# Supplementary material for: An improved scoring method for the identification of endogenous peptides based on the Mascot MS/MS ion search
Source: Royal Society of Chemistry journal article supplement (doi:10.1039/c8an02141d), 2019-01-01
Supplement: c8an02141d2.xlsx [file c8an02141d2.xlsx]

## Sheet: 工作表3
Table S-1.
Query Number	Observed m/z	Observed MW	Theoretical MW	MW Error	Before	Seq	After	Mascot Score	DS	Accession	2nd Rank Mascot Score	2nd Rank Theoretical MW[Error]	2nd Rank Seq Accession	Before	2nd Rank Seq	After	3rd Rank Mascot Score	3rd Rank Theoretical MW[Error]	3rd Rank Seq	4th Rank Seq	5th Rank Seq	6th Rank Seq	7th Rank Seq	8th Rank Seq	9th Rank Seq	10th Rank Seq
query62	409.727	817.439	817.455	-0.015514	L	TESLGKAL	R	55.16	4.69	gi|215266209|emb	50.47	817.429367[0.009633]	gi|02769	C	TESLVNR	R	25.86	817.454544[-0.015544]	TTGQSLIV	MVSLVRN	TESSLGKP	TESKPTR	ETSLNVGV	ETEAVNR	TESGLRVG	TEDRNLA
query15	403.202	804.389	804.413	-0.024302	L	FPGIDRT	T	55.32	15.2	###RND###gi|215267462|emb	40.12	804.376633[0.012075]	gi|00489	A	FPGDVDR	L	37.99	804.361359[0.027349]	EDGEVTR	EDGVETR	FPGDNKAG	PFGVERT	FAVVLTR	EDITART	ETAEVRT	ETAVERT
query66	409.73	817.445	817.429	0.016103	C	TESLVNR	R	52.13	3.8	gi|02769	48.33	817.454514[-0.009044]	gi|215266209|emb	L	TESLGKAL	R	24.76	817.447998[-0.002528]	MVSLVRN	TESKPTR	TESGLRVG	TEAERGR	ETSLNVGV	ETEAVNR	TTGQSLIV	TESSLGKP
query411	435.236	868.457	868.444	0.013157	K	FAAYLER	E	52.71	8.71	gi|00489	44	868.396683[0.060749]	###RND###gi|215264747|emb	A	FAAFEIDG	G	29.12	868.444275[0.013157]	FAAYIRE	FAADCLET	AFLYALAT	DCAYPIST	AFFSIITA	WCYLLDG	AFAEFER	MSALYER
query653	457.77	913.525	913.513	0.01186	Y	FALAHTVR	D	52.29	14.27	gi|00489	38.02	913.523239[0.002003]	gi|215264683|emb	E	RILEALAE	V	27.77	913.523239[0.002003]	LAAGKAAIAE	TSLPIALAE	RGAVAKLAE	FAIAEHIN	FALAREHA	IGLVEAIAE	QRLNALAE	EPDVAALAE
query269	423.735	845.455	845.424	0.030278	I	SDLDQLR	K	50.07	17.13	gi|00489	32.94	845.442917[0.011647]	###RND###gi|215263523|emb	G	VCLDQIR	Q	32.52	845.424286[0.030278]	SDIALDGR	SDIISGVR	SDINLER	SDLADGLR	SDLEKVR	SEVDLKR	SVEDIKR	SVEDQIR
query1609	516.27	1030.53	1030.51	0.016895	R	IGSEVYHNL	K	53.4	15.49	gi|00924	37.91	1030.519577[0.005665]	###RND###gi|215263356|emb	G	LGSDYLHAR	P	24.53	1030.493958[0.031284]	IGCIVMNANP	LGSGNNAATRA	IGYSIDHRA	IGSENAEQAL	LGSEAAAYHI	NGEVCLGGGII	LGSNNTVLVD	IGSPMVALMI
query852	471.789	941.563	941.555	0.00884	A	NELLINVK	Y	50.56	13.15	gi|00330	37.41	941.565781[-0.002391]	gi|215267746|emb	C	NELLLRGK	S	28.26	941.518188[0.045202]	STGINLLPQ	SRLILAKAA	SRLLLLEV	NELIARRA	NELIQVLN	NELLGVAIN	AATILRAAR	ENLLAGVQV
