# Supplementary material for: An improved scoring method for the identification of endogenous peptides based on the Mascot MS/MS ion search
Source: Royal Society of Chemistry journal article supplement (doi:10.1039/c8an02141d), 2019-01-01
Supplement: c8an02141d3.xlsx [file c8an02141d3.xlsx]

## Sheet: Mascot_NES_152
Table S-2. (Peptides Identified by Mascot in NES search)
Query Number	Observed m/z	Observed MW	Observed Charge State	Theoretical MW	MW Error	Residue Before	Seq	Residue After	Modification	Mod Location	Mascot Score	Unique	Missed Cleavage	Accession	DS	Contribution Fraction C1	CS	Title	Subranked Theoretical MW[Error]	Subranked Seq/Mod[Loc]	Subranked Mascot Scores	Subranked Random Matched Probabilities	Subranked DS	Subranked Contibution Fractions	Subranked CS
query7251	771.371	1540.73	2	1540.73	-0.002985	V	PSGASTGVHEALEMR	D			128.56	1	0	gi|00924	115.98	1	110.726	131007_Sam_Standard_03_p.03486.03486.2	1540.784546[-0.057154];1540.756866[-0.029474];1540.806961[-0.079569];1540.811035[-0.083643];1540.811005[-0.083613];1540.719818[0.007574];1540.762054[-0.034662];1540.736893[-0.009501];1540.751678[-0.024286]	GVVGEESRGIGTNPGI/;ALGACGRTRNAASFF/;KPSSSNSRSKGHAKA/;PGTGSGRVRQVIEW/;LAGAARAEGKFHNVT/;AALGSFAGAVVDWYD/;PSGDSNIELGPTEIL/;LQAGLNQSDDPAEIA/;KIVEYDDMITAML/	12.580000;9.850000;9.080000;6.760000;6.410000;6.310000;6.250000;5.650000;5.540000	0.055208;0.103514;0.123595;0.210863;0.228560;0.233884;0.237137;0.272270;0.000000	2.730000;0.770000;2.320000;0.350000;0.100000;0.060000;0.600000;0.110000;NA	0.000000000003;0.000000000001;0.000000000001;0.000000000001;0.000000000001;0.000000000001;0.000000000001;0.000000000001;0.000000000000	0.000000;0.000000;0.000000;0.000000;0.000000;0.000000;0.000000;0.000000;0.000000
query10135	911.469	1820.92	2	1820.92	0.008305	R	SGETEDTFIADLVVGLR	T			121.63	1	0	gi|00924	100.69	1	97.8621	131007_Sam_Standard_01_p.06434.06434.2	1820.951996[-0.028072];1820.905716[0.018208];1820.913086[0.010838];1820.974426[-0.050502];1820.904404[0.019520];1820.989212[-0.065288];1820.884109[0.039815];1820.946808[-0.022884];1820.842834[0.081090]	IEESISSHPVVAEVAVVG/;SQNVYQFIDLQRVDP/;LAKMIVDAWLGAQYEGG/;RADEGKLPLALDSRPPS/;VEQSVEVAVFDGTTVEL/;MEKLPMIEHGLVVLAAA/;ATITGVLAMPMEAPSFW/;ACRLVVEEHLGHVRGF/;GESDDALDSFELAPVRT/	20.940000;12.790000;12.760000;12.570000;12.020000;11.650000;11.220000;9.520000;7.200000	0.008054;0.052602;0.052966;0.055335;0.062806;0.068391;0.075509;0.111686;0.000000	8.150000;0.030000;0.190000;0.550000;0.370000;0.430000;1.700000;2.320000;NA	0.000000000085;0.000000000013;0.000000000013;0.000000000012;0.000000000011;0.000000000010;0.000000000009;0.000000000006;0.000000000004	0.000000;0.000000;0.000000;0.000000;0.000000;0.000000;0.000000;0.000000;0.000000
query9847	895.42	1788.83	2	1788.84	-0.011302	K	AAQDSFAAGWGVMVSHR	S			120.21	1	0	gi|00924	100.87	1	98.6704	131007_Sam_Standard_01_p.04282.04282.2	1788.865555[-0.040263];1788.922592[-0.097300];1788.880829[-0.055537];1788.896637[-0.071345];1788.821991[0.003301];1788.908676[-0.083384];1788.900650[-0.075358];1788.907806[-0.082514];1788.868958[-0.043666]	WSQAFAARGTPNEQAR/;NEAVLIGQLECKSMVR/;NRIASSWQWGQFPRG/;VTSSNTTAGGVATGSGLGPR/;WSAPWVDEKVHHDSP/;ITPQDAWTWAFLDLI/;NVGQSLSGQVSIGFAPGTA/;NRTTRQLSLTEEGER/;GGRPHDTAGPTKLCDKH/	19.340000;10.940000;10.800000;9.450000;8.360000;7.170000;6.350000;6.280000;4.420000	0.011641;0.080538;0.083176;0.113501;0.145881;0.191867;0.231739;0.235505;0.000000	8.400000;0.140000;1.350000;1.090000;1.190000;0.820000;0.070000;1.860000;NA	0.000000000082;0.000000000012;0.000000000011;0.000000000008;0.000000000007;0.000000000005;0.000000000004;0.000000000004;0.000000000003	0.000000;0.000000;0.000000;0.000000;0.000000;0.000000;0.000000;0.000000;0.000000
query7032	760.37	1518.72	2	1518.7	0.021154	Q	DSFAAGWGVMVSHR	S			117.92	1	0	gi|00924	92.85	1	89.8136	131007_Sam_Standard_03_p.04232.04232.2	1518.736145[-0.011195];1518.732071[-0.007121];1518.767792[-0.042842];1518.738831[-0.013881];1518.750046[-0.025096];1518.822800[-0.097850];1518.713669[0.011281];1518.688507[0.036443];1518.724884[0.000066]	GTIDQNRWGRICT/;KNGSNRAGSRAAEAM/;GEYAQLAQINATQI/;SSFGVASVPPAIGMEA/;SDFARMIPAALDNV/;VGEILFAQMKAKNA/;ISMAGATSNTVHAYP/;MFADDVNKEASHR/;LMGAATRAAQGAEWS/	25.070000;23.540000;15.700000;11.040000;10.410000;10.280000;10.170000;9.590000;9.180000	0.003112;0.004426;0.026915;0.078705;0.090991;0.093756;0.096161;0.109901;0.000000	1.530000;7.840000;4.660000;0.630000;0.130000;0.110000;0.580000;0.410000;NA	0.000000000519;0.000000000365;0.000000000060;0.000000000021;0.000000000018;0.000000000017;0.000000000017;0.000000000015;0.000000000013	0.000000;0.000000;0.000000;0.000000;0.000000;0.000000;0.000000;0.000000;0.000000
query8334	820.905	1639.8	2	1639.8	-0.002558	I	VPSGASTGVHEALEMR	D			117.8	1	0	gi|00924	106.38	1	100.91	131007_Sam_Standard_03_p.03493.03493.2	1639.866867[-0.070627];1639.798782[-0.002542];1639.795410[0.000830];1639.732544[0.063696];1639.890182[-0.093942];1639.722183[0.074057];1639.770477[0.025763];1639.839188[-0.042948];1639.831818[-0.035578]	KIADPGDPTIDLVLSS/;QIIGSSQMYATAQSR/;DYRRFNQILEGET/;ADRGLNADLDTSEYT/;KIMSHATRPAVMSLV/;ENQVEGMCALFLGET/;VPTMNGAWYAEFVVG/;QLAVKGEYFDAMIR/;PAHSILVDEQRQTF/	11.420000;9.080000;7.230000;6.200000;6.130000;5.620000;5.430000;5.020000;4.830000	0.072111;0.123595;0.189234;0.239883;0.243781;0.274157;0.286418;0.314775;0.000000	2.340000;1.850000;1.030000;0.070000;0.510000;0.190000;0.410000;0.190000;NA	0.000000000023;0.000000000013;0.000000000009;0.000000000007;0.000000000007;0.000000000006;0.000000000006;0.000000000005;0.000000000005	0.000000;0.000000;0.000000;0.000000;0.000000;0.000000;0.000000;0.000000;0.000000
query7656	790.91	1579.81	2	1579.82	-0.018352	R	QIIEQLSSGFFSPK	Q			110.93	1	0	gi|00489	94.57	1	88.3985	131007_Sam_Standard_01_p.05104.05104.2	1579.791580[0.014668];1579.879410[-0.073162];1579.850418[-0.044170];1579.831818[-0.025570];1579.831772[-0.025524];1579.839828[-0.033580];1579.893356[-0.087108];1579.865662[-0.059414];1579.831802[-0.025554]	KLKMVDPSSKAFDD/;LNAQGKPVDRIQNK/;AGLIKMSGNRSVGYK/;QLQGADLPKQGIQGQ/;TNIRIEELKEHQA/;IKLESAGAFWKAPY/;LIKESGIAGGVNAVPGV/;KLMSAGPLYHKKHA/;VAQKTPKSDHASLQA/	16.360000;14.600000;12.870000;12.160000;12.150000;11.850000;11.390000;11.110000;11.080000	0.023121;0.034674;0.051642;0.060814;0.060954;0.065313;0.072611;0.077446;0.000000	1.760000;1.730000;0.710000;0.010000;0.300000;0.460000;0.280000;0.030000;NA	0.000000000349;0.000000000233;0.000000000156;0.000000000133;0.000000000132;0.000000000124;0.000000000111;0.000000000104;0.000000000104	0.000000;0.000000;0.000000;0.000000;0.000000;0.000000;0.000000;0.000000;0.000000
query5322	681.875	1361.73	2	1361.73	0.004537	S	GAAGGLGSLAVQYAK	A			107.58	1	0	gi|00330	70.67	1	70.5545	131007_Sam_Standard_03_p.03532.03532.2	1361.777893[-0.043055];1361.701309[0.033529];1361.672791[0.062047];1361.705139[0.029699];1361.744232[-0.009394];1361.755432[-0.020594];1361.676132[0.058706];1361.766663[-0.031825];1361.780594[-0.045756]	KANLSVAARSFKA/;RIEDMAYGLVPV/;AGANIDGKHYFGI/;QNRPLVDLEHAA/;VTLLKEVADFDI/;IEALQGEIKSFK/;QNAPGIAAMKAAGY/;QKRAAELLGLTY/;SILLLEKGITFE/	36.910000;14.630000;12.860000;12.260000;12.130000;12.060000;11.300000;10.280000;10.240000	0.000204;0.034435;0.051761;0.059429;0.061235;0.062230;0.074131;0.093756;0.000000	22.280000;1.770000;0.600000;0.130000;0.070000;0.760000;1.020000;0.040000;NA	0.000000085704;0.000000000507;0.000000000337;0.000000000294;0.000000000285;0.000000000281;0.000000000236;0.000000000186;0.000000000185	0.000000;0.000000;0.000000;0.000000;0.000000;0.000000;0.000000;0.000000;0.000000
query10311	920.956	1839.9	2	1839.91	-0.016718	R	SIVPSGASTGVHEALEMR	D			104.85	1	0	gi|00924	87.22	1	84.831	131007_Sam_Standard_03_p.03497.03497.2	1839.904297[-0.006129];1839.900284[-0.002116];1839.987640[-0.089472];1839.871933[0.026235];1839.916214[-0.018046];1839.834930[0.063238];1839.834717[0.063451];1839.867935[0.030233];1839.886368[0.011800]	TAFDALGAKAGDYYPPAL/;DALRKESSLSAFTFDGP/;EAVRMALVNLSAVAAPAGT/;ALDNSHERPAAMLREM/;NQGKINVMHSYHSLGR/;ALDFTHTMTGSPYIDAT/;ARADEADQVNGQPAVAND/;LSVAFVESFYHALDAGD/;RYNNHSDPGTLDPQKV/	17.630000;10.540000;9.700000;8.440000;5.340000;5.160000;4.800000;4.100000;4.090000	0.017258;0.088308;0.107152;0.143219;0.292415;0.304789;0.331131;0.389045;0.000000	7.090000;0.840000;1.260000;3.100000;0.180000;0.360000;0.700000;0.010000;NA	0.000000001897;0.000000000371;0.000000000305;0.000000000229;0.000000000112;0.000000000107;0.000000000099;0.000000000084;0.000000000084	0.000000;0.000000;0.000000;0.000000;0.000000;0.000000;0.000000;0.000000;0.000000
query6621	740.4	1478.79	2	1478.79	-0.002039	K	LGEYGFQNALIVR	Y			103.63	1	0	gi|02769	81.85	1	78.4033	131007_Sam_Standard_02_p.04486.04486.2	1478.736511[0.049597];1478.725311[0.060797];1478.740524[0.045584];1478.754654[0.031454];1478.766571[0.019537];1478.740524[0.045584];1478.739868[0.046240];1478.787674[-0.001566];1478.765671[0.020437]	LADISGQQLDYRT/;LVSYQINDDGTVVG/;IWYGDKENIALGT/;GLESIKVMDLLMM/;IWCMSFILVLTGP/;LDAYSKLTTWNAP/;GESLALSSSKMDVR/;ISTICCLLIGYPLA/;SYDPEIFKILPAS/	21.780000;17.780000;14.430000;14.040000;13.330000;11.310000;10.720000;10.580000;10.480000	0.006637;0.016672;0.036058;0.039446;0.046452;0.073961;0.084723;0.087498;0.000000	4.000000;3.350000;0.390000;0.710000;2.020000;0.590000;0.140000;0.100000;NA	0.000000006531;0.000000002600;0.000000001202;0.000000001099;0.000000000933;0.000000000586;0.000000000512;0.000000000495;0.000000000484	0.000000;0.000000;0.000000;0.000000;0.000000;0.000000;0.000000;0.000000;0.000000
query8382	824.378	1646.74	2	1646.76	-0.020945	A	QDSFAAGWGVMVSHR	S			100.65	1	0	gi|00924	84.88	1	79.6303	131007_Sam_Standard_01_p.04289.04289.2	1646.838943[-0.097513];1646.778763[-0.037333];1646.805283[-0.063853];1646.819870[-0.078440];1646.823883[-0.082453];1646.803909[-0.062479];1646.779663[-0.038233];1646.790024[-0.048594];1646.837616[-0.096186]	SPHRAKRPWQGAQE/;QDQPDYLNAAVALET/;SSFGVAGARFASVAYTG/;FNHETRLMSGVTQK/;RMQGSGAPYPALWLT/;NFLEEEALIEVPGST/;MPPMYGQPGGLQGLTT/;QDYGRPPVTAIQDST/;SRSFKGGPQDKQALE/	15.770000;13.140000;12.260000;12.230000;9.190000;8.530000;8.400000;8.070000;7.640000	0.026485;0.048529;0.059429;0.059841;0.120504;0.140281;0.144544;0.155955;0.000000	2.630000;0.880000;0.030000;3.040000;0.660000;0.130000;0.330000;0.430000;NA	0.000000003251;0.000000001774;0.000000001449;0.000000001439;0.000000000714;0.000000000614;0.000000000596;0.000000000552;0.000000000500	0.000000;0.000000;0.000000;0.000000;0.000000;0.000000;0.000000;0.000000;0.000000
query7540	784.919	1567.82	2	1567.82	-0.000269	R	KLLSYVDDEAFIR	D			100.2	1	0	gi|00489	78.76	1	76.0489	131007_Sam_Standard_03_p.04051.04051.2	1567.814041[0.010275];1567.747818[0.076498];1567.818054[0.006262];1567.831787[-0.007471];1567.869507[-0.045191];1567.835861[-0.011545];1567.919830[-0.095514];1567.827957[-0.003641];1567.752045[0.072271]	QLLGDREMSPVPAR/;QPANHSTEVLSTIDG/;QLLHLMIHSLYSN/;KISIDTQNINHSAK/;QLLIGHYERRQR/;QIPDATPTGFVAPVR/;KLLSKNGVFKAHGVA/;QLIKNPLPTETMPS/;QLLLSGMSCASCVTR/	21.440000;13.700000;12.660000;12.020000;11.840000;11.390000;10.660000;10.470000;10.460000	0.007178;0.042658;0.054200;0.062806;0.065464;0.072611;0.085901;0.089743;0.000000	7.740000;1.040000;0.640000;0.180000;0.450000;0.730000;0.190000;0.010000;NA	0.000000013305;0.000000002239;0.000000001762;0.000000001521;0.000000001459;0.000000001315;0.000000001112;0.000000001064;0.000000001062	0.000000;0.000000;0.000000;0.000000;0.000000;0.000000;0.000000;0.000000;0.000000
query7037	760.383	1518.75	2	1518.77	-0.016367	V	LGIDGGEGKEELFR	S			97.53	1	0	gi|00330	66.75	1	66.0397	131007_Sam_Standard_02_p.03711.03711.2	1518.764633[-0.013193];1518.771835[-0.020395];1518.734787[0.016653];1518.786453[-0.035013];1518.792984[-0.041544];1518.721512[0.029928];1518.713699[0.037741];1518.815445[-0.064005];1518.815414[-0.063974]	LGIDENTLMAMRR/;LAVDWGLTFLAENA/;LLGDDERINATMTA/;LGDLNRFTLTGCLP/;LGIDPQSKTLVFSD/;LRENWVNFNAQE/;GLGSITFSMQVDGAH/;VIADGGTRNVAFTAK/;ILGDREKRSVFAE/	30.780000;16.970000;16.560000;15.520000;14.760000;11.960000;11.810000;10.310000;10.170000	0.000836;0.020091;0.022080;0.028054;0.033420;0.063680;0.065917;0.093111;0.000000	13.810000;0.410000;1.040000;0.760000;2.800000;0.150000;1.500000;0.140000;NA	0.000000211349;0.000000008790;0.000000007998;0.000000006295;0.000000005284;0.000000002773;0.000000002679;0.000000001897;0.000000001837	0.000001;0.000000;0.000000;0.000000;0.000000;0.000000;0.000000;0.000000;0.000000
query5800	703.852	1405.69	2	1405.68	0.005072	L	GIDGGEGKEELFR	S			96.95	1	0	gi|00330	75.39	1	72.2309	131007_Sam_Standard_02_p.03709.03709.2	1405.731339[-0.042521];1405.680573[0.008245];1405.720154[-0.031336];1405.651382[0.037436];1405.622192[0.066626];1405.720139[-0.031321];1405.760574[-0.071756];1405.687775[0.001043];1405.610977[0.077841]	TARAEGLFKEER/;GIDENTLMAMRR/;GLDFGSDSVRALAV/;VATEHEPGGLYAY/;GNNNEFLGREQE/;REGADASTVIQFL/;GINPFLGYTLVGVG/;AVDWGLTFLAENA/;QDDGAEAIPGYDR/	21.560000;17.930000;13.050000;12.110000;11.590000;10.940000;10.780000;9.020000;8.970000	0.006982;0.016106;0.049545;0.061518;0.069343;0.080538;0.083560;0.125314;0.000000	3.630000;4.880000;0.940000;0.520000;0.650000;0.160000;1.760000;0.050000;NA	0.000000028907;0.000000012531;0.000000004074;0.000000003281;0.000000002911;0.000000002506;0.000000002415;0.000000001611;0.000000001592	0.000000;0.000000;0.000000;0.000000;0.000000;0.000000;0.000000;0.000000;0.000000
query8053	809.93	1617.85	2	1617.84	0.009939	R	VLGIDGGEGKEELFR	S			95.89	1	0	gi|00330	70.4	1	68.428	131007_Sam_Standard_02_p.03710.03710.2	1617.777405[0.068761];1617.854874[-0.008708];1617.756256[0.089910];1617.807266[0.038900];1617.888550[-0.042384];1617.909012[-0.062846];1617.843597[0.002569];1617.822327[0.023839];1617.777344[0.068822]	DPGIDEILDDTGVFI/;VLGDLNRFTLTGCLP/;DPGVVSVSEIYQYY/;VLGDLGFLMGGTPNEV/;RILRTHAAMSVLGHG/;VILTALIPDDAKVGGH/;VLGIPKPKTMEENY/;ALLTVGIDDTHNRHG/;IVGIPEEEQELYEA/	25.490000;18.610000;14.500000;14.120000;12.740000;12.550000;12.330000;11.060000;10.080000	0.002825;0.013772;0.035481;0.038726;0.053211;0.055590;0.058479;0.078343;0.000000	6.880000;4.110000;0.380000;1.380000;0.190000;0.220000;1.270000;0.980000;NA	0.000000091201;0.000000018707;0.000000007261;0.000000006653;0.000000004842;0.000000004634;0.000000004406;0.000000003289;0.000000002624	0.000000;0.000000;0.000000;0.000000;0.000000;0.000000;0.000000;0.000000;0.000000
query9520	878.479	1754.94	2	1754.94	0.001775	K	TAGIQIVADDLTVTNPK	R			94.48	1	0	gi|00924	75.37	1	70.0686	131007_Sam_Standard_03_p.04297.04297.2	1755.011490[-0.068278];1754.949936[-0.006724];1754.868652[0.074560];1754.883926[0.059286];1754.950806[-0.007594];1754.941406[0.001806];1754.854691[0.088521];1754.866119[0.077093];1754.938690[0.004522]	ATGIQLKKQRSQGNKV/;GGEARLNRSIDVRKNA/;VNEVLQDADLGILNDQ/;VDGAQIIGLWGDGVENL/;FFFAALGVRYLAGNIP/;PTGKSLVEGRDELLLE/;LQTGAEAQNAEERNKP/;AAKAEIEHLMNEVFGP/;AASIQEEQGGARALAKR/	19.110000;18.040000;17.260000;12.210000;11.610000;11.270000;10.850000;10.660000;9.760000	0.012274;0.015704;0.018793;0.060117;0.069024;0.074645;0.082224;0.085901;0.000000	1.070000;0.780000;5.050000;0.600000;0.340000;0.420000;0.190000;0.900000;NA	0.000000029040;0.000000022699;0.000000018967;0.000000005929;0.000000005164;0.000000004775;0.000000004335;0.000000004150;0.000000003373	0.000000;0.000000;0.000000;0.000000;0.000000;0.000000;0.000000;0.000000;0.000000
query8159	814.395	1626.78	2	1626.79	-0.01333	L	SYVDDEAFIRDVAK	V			93.88	1	0	gi|00489	83.33	1	76.5208	131007_Sam_Standard_03_p.04680.04680.2	1626.726929[0.048681];1626.777725[-0.002115];1626.749405[0.026205];1626.683182[0.092428];1626.830048[-0.054438];1626.734802[0.040808];1626.804398[-0.028788];1626.844620[-0.069010];1626.857666[-0.082056]	AEQMTMLEETFGIQ/;SYLTPEDLSQVFTQ/;SYVDNTRIGAMGICAG/;FCDGQDSADTLITNAG/;TFTPVMAARAQHAVQ/;DGPALPEPAFAPQNCT/;MAGSLKIGRYCMIGGA/;FIALFFAEHSLVFS/;EEGEQATSPRLLGLK/	10.550000;9.050000;8.960000;8.830000;7.980000;5.710000;5.440000;5.040000;4.550000	0.088105;0.124451;0.127057;0.130918;0.159221;0.268534;0.285759;0.313329;0.000000	1.500000;0.090000;0.130000;0.850000;2.270000;0.270000;0.400000;0.490000;NA	0.000000004645;0.000000003289;0.000000003221;0.000000003126;0.000000002570;0.000000001524;0.000000001432;0.000000001306;0.000000001167	0.000000;0.000000;0.000000;0.000000;0.000000;0.000000;0.000000;0.000000;0.000000
query5868	707.376	1412.74	2	1412.71	0.027943	K	WLTGPQLADLYH	S			90.76	1	0	gi|00924	75.12	1	68.9382	131007_Sam_Standard_02_p.04880.04880.2	1412.762344[-0.025554];1412.733322[0.003468];1412.672455[0.064335];1412.678314[0.058476];1412.723434[0.013356];1412.712189[0.024601];1412.752441[-0.015651];1412.696960[0.039830];1412.762344[-0.025554]	GTIIEGGDVNGRLI/;EPKNITLSCGAPAL/;FDYEQLAFQRP/;GEIVAEIDDAERP/;EGILNRCVYIPH/;PAMQALIEQIYH/;DALRARLVTHFD/;VIVPCGNIADIADN/;SVTLGVSARAQVEP/	15.640000;12.930000;12.830000;12.050000;11.780000;11.630000;11.190000;10.060000;8.870000	0.027290;0.050933;0.052119;0.062373;0.066374;0.068707;0.076033;0.098628;0.000000	2.710000;0.100000;0.780000;0.270000;0.150000;0.440000;1.130000;1.190000;NA	0.000000030761;0.000000016482;0.000000016106;0.000000013459;0.000000012647;0.000000012218;0.000000011041;0.000000008511;0.000000006471	0.000000;0.000000;0.000000;0.000000;0.000000;0.000000;0.000000;0.000000;0.000000
query7309	775.895	1549.78	2	1549.76	0.013479	R	IGEEYISDLDQLR	K			90.71	1	0	gi|00489	68.41	1	66.0851	131007_Sam_Standard_01_p.04456.04456.2	1549.835144[-0.059290];1549.763702[0.012152];1549.803482[-0.027628];1549.810013[-0.034159];1549.798752[-0.022898];1549.766418[0.009436];1549.727509[0.048345];1549.778503[-0.002649];1549.708908[0.066946]	IADYELSALLVTRS/;WLYELGNRETNR/;TVGMALADSLNRRF/;IGSYRSQDGAVTALI/;DAIEASGLEYTILR/;WASADLEVFTELIG/;WLEYPNMLWLAD/;LMFLSLPQWMER/;LAQEFGNFLDFYS/	22.300000;14.130000;13.530000;12.390000;11.090000;10.500000;10.450000;9.990000;9.700000	0.005888;0.038637;0.044361;0.057677;0.077804;0.089125;0.090157;0.100231;0.000000	8.170000;0.600000;1.140000;1.300000;0.590000;0.050000;0.460000;0.290000;NA	0.000000144211;0.000000021979;0.000000019143;0.000000014723;0.000000010914;0.000000009528;0.000000009419;0.000000008472;0.000000007925	0.000001;0.000000;0.000000;0.000000;0.000000;0.000000;0.000000;0.000000;0.000000
query10412	927.473	1852.93	2	1852.96	-0.026424	K	LLSYVDDEAFIRDVAK	V			89.67	1	0	gi|00489	73.96	1	70.1224	131007_Sam_Standard_03_p.04682.04682.2	1852.851257[0.079381];1852.989441[-0.058803];1852.972290[-0.041652];1852.898895[0.031743];1852.910110[0.020528];1852.877747[0.052891];1852.975677[-0.045039];1852.917511[0.013127];1853.027130[-0.096492]	FADKNDDISMEKELQA/;IVSRSGTLTYEAVKQTT/;IEYAVYAELTRNIWL/;LLSQTLLGNEGHMNTPE/;LLSEKAQAIQGDNLNCH/;LISEATNYVAADYMRH/;LLSTIPPGPACIYNNPAI/;QTKETYIAPMRVSMAQ/;LLPYLIHTDSNRQRK/	15.710000;10.340000;8.680000;8.260000;8.110000;7.970000;7.570000;7.480000;5.940000	0.026853;0.092470;0.135519;0.149279;0.154525;0.159588;0.174985;0.178649;0.000000	5.370000;1.660000;0.420000;0.150000;0.140000;0.400000;0.090000;1.540000;NA	0.000000040179;0.000000011668;0.000000007962;0.000000007228;0.000000006982;0.000000006761;0.000000006166;0.000000006039;0.000000004236	0.000000;0.000000;0.000000;0.000000;0.000000;0.000000;0.000000;0.000000;0.000000
query6080	713.896	1425.78	2	1425.77	0.004872	R	HLQIIYEINQR	F			89.41	1	0	gi|00489	50.32	0.999988	49.3387	131007_Sam_Standard_03_p.03313.03313.2	1425.834366[-0.056682];1425.736450[0.041234];1425.728577[0.049107];1425.750351[0.027333];1425.753723[0.023961];1425.820450[-0.042766];1425.783569[-0.005885];1425.772827[0.004857];1425.750351[0.027333]	HIKLIDLHIDPL/;LHQGEAGELRIGF/;AEASHNIVLLQTM/;SYQLLKAYDVNI/;SYKLKLTNEVMT/;HIKLAAFDVTRR/;IKHLLCCAIAASAL/;HIEIASRQINVF/;IHLQIAPYETIE/	39.090000;27.430000;26.560000;26.560000;23.950000;22.140000;19.090000;17.170000;17.130000	0.000123;0.001807;0.002208;0.002208;0.004027;0.006109;0.012331;0.019187;0.000000	11.660000;0.870000;0.000000;2.610000;1.810000;3.050000;1.920000;0.040000;NA	0.000009289556;0.000000633862;0.000000518794;0.000000518794;0.000000284443;0.000000187497;0.000000092896;0.000000059703;0.000000059155	0.000040;0.000003;0.000002;0.000002;0.000001;0.000001;0.000000;0.000000;0.000000
query6185	720.871	1439.73	2	1439.73	-0.001872	K	LLSYVDDEAFIR	D			88.92	1	0	gi|00489	73.67	1	68.5473	131007_Sam_Standard_02_p.04404.04404.2	1439.664276[0.063482];1439.755463[-0.027705];1439.685394[0.042364];1439.685379[0.042379];1439.715225[0.012533];1439.761993[-0.034235];1439.755646[-0.027888];1439.693268[0.034490];1439.733002[-0.005244]	EALDFDPAFCLTV/;LIHLLESMQGGSR/;LLSFLECLTTEDG/;LISLDYDDTLMAA/;LIMMSVITNAYAN/;LLSVDPNNQSQII/;IICYFPQLSLML/;TPPLGPQDQPDYL/;LMAALLHDVIEDT/	15.250000;13.790000;11.990000;11.120000;6.870000;6.740000;6.590000;6.450000;6.250000	0.029854;0.041783;0.063241;0.077268;0.205589;0.211836;0.219280;0.226464;0.000000	1.460000;1.800000;0.870000;4.250000;0.130000;0.150000;0.140000;0.200000;NA	0.000000042954;0.000000030690;0.000000020277;0.000000016596;0.000000006237;0.000000006053;0.000000005848;0.000000005662;0.000000005408	0.000000;0.000000;0.000000;0.000000;0.000000;0.000000;0.000000;0.000000;0.000000
query14753	771.391	2311.15	3	2311.14	0.00927	K	ATDGGAHGVINVSVSEAAIEASTR	Y			86.95	1	0	gi|00330	82.2	1	73.7905	131007_Sam_Standard_01_p.03851.03851.3	2311.165558[-0.015877];2311.169601[-0.019920];2311.170898[-0.021217];2311.239822[-0.090141];2311.107590[0.042091];2311.133881[0.015800];2311.151810[-0.002129];2311.147781[0.001900];2311.155838[-0.006157]	DTHVERIEQLGSASLLAGLTSD/;AVSSDLGYLQVSGSQLKQDFLG/;PVHYAGAPADIDAIRAIGERYG/;KGKKIAMTWAYSPSYGKPLSV/;ISLGCTMILSNVSALEDEGGGVF/;KRTRGFDKCSDAESVDLTRQ/;DKALFGDLTDCADFAALLREK/;QCPLIQAPNSLLETGSREQVE/;PAWDAYMKAVLEGVPEQPLTP/	4.750000;4.730000;3.580000;3.510000;3.480000;3.240000;3.130000;2.890000;2.740000	0.334965;0.336512;0.438531;0.445656;0.448745;0.474242;0.486407;0.514044;0.000000	0.020000;1.150000;0.070000;0.030000;0.240000;0.110000;0.240000;0.150000;NA	0.000000006026;0.000000005998;0.000000004603;0.000000004529;0.000000004498;0.000000004256;0.000000004150;0.000000003926;0.000000003793	0.000000;0.000000;0.000000;0.000000;0.000000;0.000000;0.000000;0.000000;0.000000
query5601	693.882	1385.75	2	1385.73	0.015188	R	ANGTTVLVGMPAGAK	C			85.15	1	0	gi|00330	71.75	1	64.4801	131007_Sam_Standard_02_p.03015.03015.2	1385.817017[-0.068141];1385.780640[-0.031764];1385.726273[0.022603];1385.715042[0.033834];1385.795227[-0.046351];1385.703812[0.045064];1385.762650[-0.013774];1385.689911[0.058965];1385.817657[-0.068781]	LAYVPSVIVDVIV/;DVETVVLVTIIW/;QNEERVSKIVGQ/;KGGSPEGTVKANLE/;NATVMNTVLVLLV/;KGGEIKSLDDIDP/;GKGSITEQLLNAR/;NDGRTIVSDGKPQ/;RMKQLVADGKKI/	13.400000;12.480000;12.190000;10.850000;10.480000;10.330000;9.700000;9.450000;9.180000	0.045709;0.056494;0.060395;0.082224;0.089536;0.092683;0.107152;0.113501;0.000000	0.920000;0.290000;1.340000;0.370000;0.150000;0.630000;0.250000;0.270000;NA	0.000000066834;0.000000054075;0.000000050582;0.000000037154;0.000000034119;0.000000032961;0.000000028510;0.000000026915;0.000000025293	0.000000;0.000000;0.000000;0.000000;0.000000;0.000000;0.000000;0.000000;0.000000
query4427	643.349	1284.68	2	1284.69	-0.008357	Q	IVADDLTVTNPK	R			84.55	1	0	gi|00924	61.25	0.999997	55.608	131007_Sam_Standard_01_p.02648.02648.2	1284.590759[0.093419];1284.728897[-0.044719];1284.728897[-0.044719];1284.619766[0.064412];1284.674744[0.009434];1284.619751[0.064427];1284.635025[0.049153];1284.714966[-0.030788];1284.733612[-0.049434]	PDADDLMAEVIP/;IVAEVSEVAKGAL/;LLTADLISLNVN/;LTSPDLTGPQGEA/;LASEICLSKQPP/;SPTLAEEVTPQN/;LATIEVFSPDHG/;LLGDEGIERRK/;VLANAQMVVRKG/	23.300000;22.150000;21.710000;20.090000;16.910000;16.620000;13.640000;12.770000;12.680000	0.004677;0.006095;0.006745;0.009795;0.020370;0.021777;0.043251;0.052845;0.000000	1.150000;0.440000;1.620000;3.180000;0.290000;2.980000;0.870000;0.090000;NA	0.000000749892;0.000000575438;0.000000519995;0.000000358095;0.000000172186;0.000000161064;0.000000081096;0.000000066374;0.000000065013	0.000003;0.000002;0.000002;0.000002;0.000001;0.000001;0.000000;0.000000;0.000000
query5856	706.919	1411.82	2	1411.81	0.007924	K	LGANAILGVSLAASR	A			84.38	1	0	gi|00924	58.28	0.999996	54.2989	131007_Sam_Standard_01_p.04485.04485.2	1411.755859[0.066747];1411.807480[0.015126];1411.792206[0.030400];1411.764587[0.058019];1411.778290[0.044316];1411.858459[-0.035853];1411.862289[-0.039683];1411.785690[0.036916];1411.778305[0.044301]	LELAIVGLIDGGGEG/;ELIALLHKVEFT/;LEPSLLELKKDAG/;IGQSVFKLFMSR/;SPELLLRKDGER/;KIKGLLMSAQPKV/;IARQALRLIKSGS/;KLQGLLASCQPAAI/;LLQANLRNDVSAV/	26.100000;21.390000;21.000000;18.840000;18.300000;17.870000;17.430000;17.390000;15.090000	0.002455;0.007261;0.007943;0.013062;0.014791;0.016331;0.018072;0.018239;0.000000	4.710000;0.390000;2.160000;0.540000;0.430000;0.440000;0.040000;2.300000;NA	0.000001485930;0.000000502341;0.000000459196;0.000000279253;0.000000246603;0.000000223356;0.000000201836;0.000000199985;0.000000117760	0.000006;0.000002;0.000002;0.000001;0.000001;0.000001;0.000001;0.000001;0.000001
query5275	679.385	1356.76	2	1356.76	-0.006159	R	GLAGVENVTELKK	N			83.85	1	0	gi|00489	60.26	0.999998	56.3043	131007_Sam_Standard_02_p.02704.02704.2	1356.772507[-0.017405];1356.783737[-0.028635];1356.797623[-0.042521];1356.724915[0.030187];1356.732285[0.022817];1356.808868[-0.053766];1356.724899[0.030203];1356.761261[-0.006159];1356.728912[0.026190]	LGQVEKGSTVIRA/;AARVQLTTTRLQ/;AGLKTELEQKKI/;LGAGVGSSVLDVVNA/;KLGVDPLTCVALE/;VAKVEIRKEGKT/;AVGVATLAVVAANDS/;GLAGAKDALQLITS/;AVADDIKLVDWL/	23.590000;21.310000;18.750000;15.330000;13.760000;13.700000;12.710000;12.540000;10.640000	0.004375;0.007396;0.013335;0.029309;0.042073;0.042658;0.053580;0.055719;0.000000	2.280000;2.560000;3.420000;1.570000;0.060000;0.990000;0.170000;1.900000;NA	0.000000941887;0.000000557184;0.000000309029;0.000000140604;0.000000097949;0.000000096605;0.000000076913;0.000000073960;0.000000047753	0.000004;0.000002;0.000001;0.000001;0.000000;0.000000;0.000000;0.000000;0.000000
query1881	529.325	1056.64	2	1056.63	0.006474	N	AILGVSLAASR	A			82.86	1	0	gi|00924	51.45	0.999977	46.4135	131007_Sam_Standard_01_p.03730.03730.2	1056.640350[-0.004756];1056.654266[-0.018672];1056.676758[-0.041164];1056.571609[0.063985];1056.581482[0.054112];1056.608002[0.027592];1056.596756[0.038838];1056.596756[0.038838];1056.640350[-0.004756]	ALIRLSARTG/;ALLDKLAKSV/;VRVVSLKTR/;SPRLSLWQA/;ALLNEIEKAG/;IALSRLFHT/;LLAGWLALNS/;IAIKDALAWG/;ALRSLLGTAR/	31.410000;28.320000;27.280000;26.370000;26.370000;26.370000;22.670000;22.490000;21.820000	0.000723;0.001472;0.001871;0.002307;0.002307;0.002307;0.005408;0.005636;0.000000	3.090000;1.040000;0.910000;0.000000;0.000000;3.700000;0.180000;0.670000;NA	0.000007161271;0.000003515524;0.000002766878;0.000002243831;0.000002243831;0.000002243831;0.000000957172;0.000000918312;0.000000787028	0.000031;0.000015;0.000012;0.000010;0.000010;0.000010;0.000004;0.000004;0.000003
query3174	594.337	1186.66	2	1186.66	0.004521	L	AGVENVTELKK	N			82.02	1	0	gi|00489	49.47	0.999968	44.9786	131007_Sam_Standard_01_p.02707.02707.2	1186.619354[0.040898];1186.583008[0.077244];1186.619339[0.040913];1186.637985[0.022267];1186.666977[-0.006725];1186.584305[0.075947];1186.619370[0.040882];1186.619339[0.040913];1186.655731[0.004521]	KVEDGLGDLNK/;AGVETTTGPLGQG/;ENIDIQSLKQ/;AGLQTLTQMPK/;QVEKGSTVIRA/;ASRAYHAGQVQ/;AGVEVITDLDR/;QITQELEQAK/;KLIDASADKVQ/	32.550000;30.860000;28.820000;25.210000;24.900000;22.840000;21.860000;21.840000;21.480000	0.000556;0.000820;0.001312;0.003013;0.003236;0.005200;0.006516;0.006546;0.000000	1.690000;2.040000;3.610000;0.310000;2.060000;0.980000;0.020000;0.360000;NA	0.000011297600;0.000007655723;0.000004786149;0.000002084425;0.000001940824;0.000001207775;0.000000963798;0.000000959370;0.000000883052	0.000049;0.000033;0.000021;0.000009;0.000008;0.000005;0.000004;0.000004;0.000004
query2963	582.828	1163.64	2	1163.63	0.010854	S	ISIVGSYVGNR	A			80.89	1	0	gi|00330	47.07	0.999968	44.892	131007_Sam_Standard_01_p.03165.03165.2	1163.662415[-0.021693];1163.643784[-0.003062];1163.662415[-0.021693];1163.582245[0.058477];1163.666229[-0.025507];1163.629852[0.010870];1163.666214[-0.025492];1163.662369[-0.021647];1163.698776[-0.058054]	LSIVGTLAMFL/;LSLVLFSSGIE/;LSLVMDVFKL/;LSLREIFGDD/;LSLRLSELHP/;ISRISQQIGY/;LEARHIELIA/;IAEMYLLKAI/;LSLIFKLISM/	33.820000;27.570000;27.570000;20.270000;20.270000;18.320000;17.460000;16.670000;16.390000	0.000415;0.001750;0.001750;0.009397;0.009397;0.014723;0.017947;0.021528;0.000000	6.250000;0.000000;7.300000;0.000000;1.950000;0.860000;0.790000;0.280000;NA	0.000019632966;0.000004655710;0.000004655710;0.000000866934;0.000000866934;0.000000553332;0.000000453927;0.000000378430;0.000000354802	0.000085;0.000020;0.000020;0.000004;0.000004;0.000002;0.000002;0.000002;0.000002
query3539	615.348	1228.68	2	1228.67	0.015064	R	GLAGVENVTELK	K			80.89	1	0	gi|00489	57.81	0.999995	52.6364	131007_Sam_Standard_03_p.03280.03280.2	1228.660431[0.020939];1228.594849[0.086521];1228.713943[-0.032573];1228.725159[-0.043789];1228.677551[0.003819];1228.729187[-0.047817];1228.666306[0.015064];1228.717941[-0.036571];1228.666306[0.015064]	VAQVEWKIAW/;AARAIGYEGNAH/;AAVVGRSVGTSLL/;AARVQLTTTRL/;LGAGTSGRLGILD/;LGPFTGRLAGKL/;AKSVIDDLAGLQ/;AAKVLFEPGGLK/;GKLVENEIVTGA/	23.080000;20.510000;19.480000;19.380000;17.430000;15.580000;14.770000;14.630000;14.360000	0.004920;0.008892;0.011272;0.011535;0.018072;0.027669;0.033343;0.034435;0.000000	2.570000;1.030000;0.100000;1.950000;1.850000;0.810000;0.140000;0.270000;NA	0.000001655761;0.000000916215;0.000000722766;0.000000706314;0.000000450814;0.000000294441;0.000000244342;0.000000236591;0.000000222330	0.000007;0.000004;0.000003;0.000003;0.000002;0.000001;0.000001;0.000001;0.000001
query1969	534.249	1066.48	2	1066.47	0.01128	Y	PNDNFFEGK	E			79.27	1	0	gi|00489	38.5	0.99985	38.2426	131007_Sam_Standard_01_p.04091.04091.2	1066.435577[0.047673];1066.544739[-0.061489];1066.527664[-0.044414];1066.479172[0.004078];1066.504333[-0.021083];1066.475342[0.007908];1066.486572[-0.003322];1066.581131[-0.097881];1066.512390[-0.029140]	NPDNFFAEN/;TKPFNFEGK/;KFGFFFQF/;PRNHTEEGQ/;PSIAHATGEGQ/;PNFATTMTNA/;PNGTTRAMGY/;NGAVVFLYKG/;PVDYLFWQ/	40.770000;27.050000;19.340000;15.520000;15.030000;13.010000;12.610000;12.140000;12.010000	0.000084;0.001972;0.011641;0.028054;0.031405;0.050003;0.054828;0.061094;0.000000	13.720000;7.710000;3.820000;0.490000;2.020000;0.400000;0.470000;0.130000;NA	0.000141232584;0.000005997012;0.000001016096;0.000000421633;0.000000376647;0.000000236557;0.000000215742;0.000000193613;0.000000187904	0.000613;0.000026;0.000004;0.000002;0.000002;0.000001;0.000001;0.000001;0.000001
query2090	538.306	1074.6	2	1074.59	0.004948	N	QIGTLSESIK	A			78.39	1	0	gi|00924	31.5	0.99925	31.2488	131007_Sam_Standard_02_p.02552.02552.2	1074.592087[0.004933];1074.585541[0.011479];1074.501541[0.095479];1074.519287[0.077733];1074.628448[-0.031428];1074.555679[0.041341];1074.643723[-0.046703];1074.534561[0.062459];1074.691315[-0.094295]	QGTILDTSIK/;QDRISIICK/;AGLDGAAMELQ/;AEAQLSSELQ/;AKSLLSDTLK/;QTLGEEASKL/;KITGINIGLF/;QLEDGPAAFK/;KLRIAFSLK/	46.890000;30.180000;27.250000;24.440000;24.440000;23.740000;22.910000;22.900000;22.840000	0.000020;0.000959;0.001884;0.003597;0.003597;0.004227;0.005117;0.005129;0.000000	16.710000;2.930000;2.810000;0.000000;0.700000;0.830000;0.010000;0.060000;NA	0.000707414755;0.000015089474;0.000007685535;0.000004024150;0.000004024150;0.000003425107;0.000002829268;0.000002822761;0.000002784031	0.003073;0.000066;0.000033;0.000017;0.000017;0.000015;0.000012;0.000012;0.000012
query2559	559.294	1116.57	2	1116.56	0.016103	R	VAAAFPGDVDR	L			77.95	1	0	gi|00489	52.67	0.999986	48.4207	131007_Sam_Standard_03_p.02553.02553.2	1116.584869[-0.012385];1116.592758[-0.020274];1116.592743[-0.020259];1116.529907[0.042577];1116.581497[-0.009013];1116.523361[0.049123];1116.530762[0.041722];1116.581528[-0.009044];1116.639038[-0.066554]	VASCSLPAEIK/;AAAVFGPQKGAT/;GALAFEPSLGR/;GLAVTDPDQTT/;KIAFPNDEAL/;QPSLMGDDVR/;INTMPGTPMVG/;GIAAEITTWGV/;VALVSSTLALSG/	25.280000;20.540000;20.270000;19.150000;18.570000;18.200000;16.390000;15.840000;15.820000	0.002965;0.008831;0.009397;0.012162;0.013900;0.015136;0.022961;0.026062;0.000000	4.740000;0.270000;1.120000;0.580000;0.370000;1.810000;0.550000;0.020000;NA	0.000005407465;0.000001815490;0.000001706058;0.000001318238;0.000001153437;0.000001059238;0.000000698222;0.000000615168;0.000000612342	0.000023;0.000008;0.000007;0.000006;0.000005;0.000005;0.000003;0.000003;0.000003
query3777	623.331	1244.65	2	1244.65	-0.002436	N	PTVEVELTTEK	G			77.8	1	0	gi|00924	54.34	0.999993	51.3111	131007_Sam_Standard_02_p.02854.02854.2	1244.577225[0.070333];1244.712860[-0.065302];1244.701614[-0.054056];1244.672470[-0.024912];1244.643448[0.004110];1244.628860[0.018698];1244.643478[0.004080];1244.640060[0.007498];1244.577194[0.070364]	IPSVEEIDTQD/;PTVETKAFPKK/;PLSEVLPSIYK/;VVAAGKNGATTVAS/;SLPEDLRMAIT/;PTPTEAGFELLA/;TPVVECTDLLR/;PEAEEALIAFR/;PSLEISNEEID/	23.460000;18.960000;18.540000;15.040000;10.450000;9.330000;9.100000;8.410000;8.410000	0.004508;0.012706;0.013996;0.031333;0.090157;0.116681;0.123027;0.144212;0.000000	4.500000;0.420000;3.500000;4.590000;1.120000;0.230000;0.690000;0.000000;NA	0.000003681263;0.000001306161;0.000001185760;0.000000529660;0.000000184076;0.000000142232;0.000000134895;0.000000115079;0.000000115079	0.000016;0.000006;0.000005;0.000002;0.000001;0.000001;0.000001;0.000000;0.000000
query7202	769.378	1536.74	2	1536.75	-0.009089	R	FKVFADYEEYVK	C			77.66	1	0	gi|00489	57.9	0.999996	53.9306	131007_Sam_Standard_02_p.04059.04059.2	1536.680618[0.060324];1536.730759[0.010183];1536.739319[0.001623];1536.739487[0.001455];1536.705612[0.035330];1536.808899[-0.067957];1536.674103[0.066839];1536.720856[0.020086];1536.730759[0.010183]	LSIQYCYYEVEAG/;QVELEEFSGSGVKE/;QADSQRPAHGDVRT/;QFVAWCREEASVI/;QDAATKNYVDGVAEG/;FKFVAAEDWVAVR/;GMSDAMIAWAEWLG/;EQHFSEEIYVTR/;EVVDDKEGKYVQE/	19.760000;15.430000;15.120000;11.680000;11.310000;11.020000;10.530000;10.370000;10.370000	0.010568;0.028642;0.030761;0.067920;0.073961;0.079068;0.088512;0.091833;0.000000	4.330000;0.310000;3.440000;0.370000;0.290000;0.490000;0.160000;0.000000;NA	0.000001621804;0.000000598409;0.000000557183;0.000000252347;0.000000231739;0.000000216770;0.000000193641;0.000000186637;0.000000186637	0.000007;0.000003;0.000002;0.000001;0.000001;0.000001;0.000001;0.000001;0.000001
query3912	626.339	1250.66	2	1250.66	0.002018	K	SISIVGSYVGNR	A			77.32	1	0	gi|00330	58.68	0.999992	51.1683	131007_Sam_Standard_03_p.03286.03286.2	1250.650635[0.013279];1250.636749[0.027165];1250.618515[0.045399];1250.745880[-0.081966];1250.723434[-0.059520];1250.713531[-0.049617];1250.673340[-0.009426];1250.658066[0.005848];1250.673141[-0.009227]	EASGLEYTILR/;ATLDVRGGYRSG/;ATDIVVMRIMC/;RLIGPGEQLRL/;VSVPNLIGALPTA/;SNKAVAVFFLR/;PATLVFMGFVLG/;SLSMVEGGVLLF/;RIPDVVQRDPG/	18.640000;18.500000;18.430000;16.870000;16.660000;14.510000;14.190000;13.990000;13.830000	0.013677;0.014125;0.014355;0.020559;0.021577;0.035400;0.038107;0.039902;0.000000	0.140000;0.070000;1.560000;0.210000;2.150000;0.320000;0.200000;0.160000;NA	0.000001355179;0.000001312190;0.000001291209;0.000000901564;0.000000859007;0.000000523596;0.000000486403;0.000000464512;0.000000447710	0.000006;0.000006;0.000006;0.000004;0.000004;0.000002;0.000002;0.000002;0.000002
query9621	589.334	1764.98	3	1764.96	0.016623	K	VHINPNSLFDVQVKR	I			77.11	1	0	gi|00489	65.87	0.999998	57.8981	131007_Sam_Standard_02_p.03705.03705.3	1764.925751[0.054373];1764.886871[0.093253];1764.982086[-0.001962];1765.042969[-0.062845];1764.952240[0.027884];1764.919205[0.060919];1765.009964[-0.029840];1764.915878[0.064246];1764.977432[0.002692]	TILYVTALQSEKDER/;FWLLDSEKGEARCIV/;HLRNQILWKNILMS/;FAISFVLLIGLLEIFA/;RPAKYKFIDVNGETK/;CALSYKKPIRDEQKS/;LFVVATMLEIGSLFLI/;QTALFQAFDTLNLQR/;FAVVLSDLTISRGQLF/	11.240000;11.220000;10.580000;10.020000;9.500000;9.410000;8.080000;7.820000;7.210000	0.075162;0.075509;0.087498;0.099541;0.112202;0.114551;0.155597;0.165196;0.000000	0.020000;0.640000;0.560000;0.520000;0.090000;1.330000;0.260000;0.610000;NA	0.000000258821;0.000000257632;0.000000222331;0.000000195434;0.000000173380;0.000000169824;0.000000125026;0.000000117760;0.000000102329	0.000001;0.000001;0.000001;0.000001;0.000001;0.000001;0.000001;0.000001;0.000000
query7527	784.378	1566.74	2	1566.74	0.006231	K	DAFLGSFLYEYSR	R			76.83	1	0	gi|02769	47.1	0.999979	46.7155	131007_Sam_Standard_01_p.05797.05797.2	1566.683807[0.057867];1566.692566[0.049108];1566.717712[0.023962];1566.812927[-0.071253];1566.735489[0.006185];1566.746033[-0.004359];1566.837418[-0.095744];1566.756561[-0.014887];1566.767822[-0.026148]	VQDPNYLFQEEDA/;WFLACSTPAHTGGYG/;EGFLHVFPQIYDC/;WFIGAVTRPMYRA/;GEFGGPWIDALFTGT/;AFPMGSGSDSQLSKR/;LRHMLPNAMVATLT/;SYSIDALNISIGEW/;YVAGVNFLLSNQQD/	29.730000;13.470000;10.930000;10.700000;10.210000;10.020000;8.790000;7.970000;7.970000	0.001064;0.044978;0.080724;0.085114;0.095280;0.099541;0.132130;0.159588;0.000000	16.260000;2.540000;0.230000;0.490000;0.190000;1.230000;0.820000;0.000000;NA	0.000019498031;0.000000461308;0.000000257034;0.000000243776;0.000000217766;0.000000208445;0.000000157033;0.000000130014;0.000000130014	0.000085;0.000002;0.000001;0.000001;0.000001;0.000001;0.000001;0.000001;0.000001
query5718	700.348	1398.68	2	1398.69	-0.004589	K	TVMENFVAFVDK	C			76.78	1	0	gi|02769	64.83	0.999998	58.038	131007_Sam_Standard_01_p.05361.05361.2	1398.755417[-0.074657];1398.689163[-0.008403];1398.677948[0.002812];1398.662689[0.018071];1398.739471[-0.058711];1398.724213[-0.043453];1398.735428[-0.054668];1398.652313[0.028447];1398.612579[0.068181]	ISRFMTRFVSR/;TVSYQVANAQYR/;ISPWPGAATGSGGEI/;SISGSHVAIDDIEG/;LSGSLSYIFGKLD/;SLPNLDVAEELTV/;EALVLKSDQAPASA/;LMDTMNDAFTKL/;SATMDESVFAVGW/	11.950000;9.070000;9.000000;8.950000;8.730000;8.680000;8.570000;8.310000;8.130000	0.063826;0.123880;0.125893;0.127350;0.133968;0.135519;0.138995;0.147571;0.000000	2.880000;0.070000;0.050000;0.220000;0.050000;0.110000;0.260000;0.180000;NA	0.000000328851;0.000000169434;0.000000166724;0.000000164816;0.000000156675;0.000000154881;0.000000151008;0.000000142233;0.000000136458	0.000001;0.000001;0.000001;0.000001;0.000001;0.000001;0.000001;0.000001;0.000001
query5485	688.849	1375.68	2	1375.68	0.005742	L	DWDKAWEVTVK	T			75.45	1	0	gi|00489	39.46	0.999879	39.162	131007_Sam_Standard_01_p.04525.04525.2	1375.730698[-0.047740];1375.731552[-0.048594];1375.688446[-0.005488];1375.657913[0.025045];1375.669342[0.013616];1375.655411[0.027547];1375.719498[-0.036540];1375.676559[0.006399];1375.705536[-0.022578]	ASRDDAITISTKV/;MGKIDALCVSRAL/;KPAWFSDPTTAR/;ENDVSIRSETLN/;WDDKMLEVLDI/;QDGMLWAESRAL/;TSLDTPVSKTTGGL/;TVTENCNDILRV/;EKETGRETRATV/	35.990000;18.390000;17.970000;17.860000;13.140000;12.970000;12.960000;12.110000;11.270000	0.000252;0.014488;0.015959;0.016368;0.048529;0.050466;0.050582;0.061518;0.000000	17.600000;0.420000;0.110000;4.720000;0.170000;0.010000;0.850000;0.840000;NA	0.000113226302;0.000001967648;0.000001786271;0.000001741596;0.000000587418;0.000000564868;0.000000563569;0.000000463391;0.000000381898	0.000492;0.000009;0.000008;0.000008;0.000003;0.000002;0.000002;0.000002;0.000002
query5532	690.37	1378.73	2	1378.71	0.016225	E	EYISDLDQLRK	L			74.72	1	0	gi|00489	53.51	0.99999	49.9938	131007_Sam_Standard_02_p.03944.03944.2	1378.781967[-0.056529];1378.688095[0.037343];1378.749634[-0.024196];1378.684067[0.041371];1378.716644[0.008794];1378.713242[0.012196];1378.678192[0.047246];1378.639816[0.085622];1378.801300[-0.075862]	EYLKGDKKIKAS/;EYLSNGKVVWAN/;EYNLLVIFIQQ/;EYLRRLDDAATG/;TMEFVDIAGLVKG/;EYLQNLVPFKE/;QYNKAFSAHWK/;EATEKSMSQIQGA/;VLFVSILWFKQ/	21.210000;16.470000;14.620000;13.420000;13.050000;12.500000;11.080000;10.240000;9.090000	0.007568;0.022542;0.034514;0.045499;0.049545;0.056234;0.077983;0.094624;0.000000	4.740000;1.850000;1.200000;0.370000;0.550000;1.420000;0.840000;1.150000;NA	0.000004456518;0.000001496221;0.000000977227;0.000000741303;0.000000680763;0.000000599785;0.000000432509;0.000000356448;0.000000273524	0.000019;0.000006;0.000004;0.000003;0.000003;0.000003;0.000002;0.000002;0.000001
query5146	674.876	1347.74	2	1347.73	0.008841	V	VGLSTLPEIYEK	M			74.01	1	0	gi|00330	55.9	0.99999	49.9048	131007_Sam_Standard_03_p.04049.04049.2	1347.703430[0.033972];1347.744034[-0.006632];1347.664352[0.073050];1347.714645[0.022757];1347.751038[-0.013636];1347.746994[-0.009592];1347.653290[0.084112];1347.645279[0.092123];1347.649277[0.088125]	VAGETLINYVVNG/;RLMGLILVMMAT/;RLSQDVDHKHN/;VKTELPGRTNAY/;INHADKVITLQP/;ATAKKASSTQSRL/;PEMVIAHIFEY/;RMGVSTSGDTVAPA/;ENITIHFDMTK/	18.110000;16.660000;16.000000;15.200000;13.190000;11.450000;11.140000;11.110000;11.020000	0.015453;0.021577;0.025119;0.030200;0.047973;0.071614;0.076913;0.077446;0.000000	1.450000;0.660000;0.800000;2.010000;1.740000;0.310000;0.030000;0.090000;NA	0.000002570370;0.000001840753;0.000001581232;0.000001315211;0.000000827934;0.000000554620;0.000000516411;0.000000512856;0.000000502337	0.000011;0.000008;0.000007;0.000006;0.000004;0.000002;0.000002;0.000002;0.000002
query2491	556.258	1110.5	2	1110.48	0.017172	F	AGENFHHGDK	L			73.61	1	0	gi|00924	51.04	0.999972	45.483	131007_Sam_Standard_01_p.03282.03282.2	1110.530548[-0.029108];1110.530533[-0.029093];1110.534561[-0.033121];1110.534546[-0.033106];1110.566940[-0.065500];1110.484268[0.017172];1110.425430[0.076010];1110.553024[-0.051584];1110.465179[0.036261]	GALDVHLSNEG/;AGNEHEDLVK/;QNFEAVLQY/;KEASSLWYAG/;KIHLVSDGDQ/;NNQVHEGWQ/;QWEDFSGDQ/;AGSRVGQGHKD/;PCGETVSYQQ/	22.570000;18.540000;18.480000;18.450000;18.380000;17.210000;16.990000;16.340000;16.290000	0.005534;0.013996;0.014191;0.014289;0.014521;0.019011;0.019999;0.023227;0.000000	4.030000;0.060000;0.030000;0.070000;1.170000;0.220000;0.650000;0.050000;NA	0.000007870235;0.000003111628;0.000003068935;0.000003047809;0.000002999078;0.000002290803;0.000002177648;0.000001874941;0.000001853479	0.000034;0.000014;0.000013;0.000013;0.000013;0.000010;0.000009;0.000008;0.000008
query4671	653.359	1304.7	2	1304.71	-0.006098	K	HLVDEPQNLIK	Q			73.58	1	0	gi|02769	48.12	0.999977	46.4138	131007_Sam_Standard_03_p.02732.02732.2	1304.672424[0.030310];1304.781616[-0.078882];1304.716232[-0.013498];1304.702301[0.000433];1304.702316[0.000418];1304.691071[0.011663];1304.727448[-0.024714];1304.724091[-0.021357];1304.708847[-0.006113]	GEYLRAENILQ/;PKGITPTTHIIK/;EFMKVAIGGILAG/;AFLCRDIARLQ/;HILREAVHTVM/;LIFASMRNIPGS/;FAMGAGLREIIK/;LHLAPWQSILQ/;TRVAYIDGGILQ/	25.460000;14.910000;14.560000;12.990000;12.900000;12.670000;12.400000;12.390000;12.310000	0.002844;0.032285;0.034995;0.050234;0.051286;0.054075;0.057544;0.057677;0.000000	10.550000;0.350000;1.570000;0.090000;0.230000;0.270000;0.010000;0.080000;NA	0.000015416652;0.000001358282;0.000001253113;0.000000872951;0.000000855047;0.000000810943;0.000000762062;0.000000760309;0.000000746432	0.000067;0.000006;0.000005;0.000004;0.000004;0.000004;0.000003;0.000003;0.000003
query2024	536.328	1070.64	2	1070.63	0.007543	K	EKDIVGAVLK	A			73.18	1	0	gi|00330	33.42	0.999206	31.0035	131007_Sam_Standard_02_p.02799.02799.2	1070.597168[0.043920];1070.644760[-0.003672];1070.633545[0.007543];1070.633530[0.007558];1070.633560[0.007528];1070.633575[0.007513];1070.572006[0.069082];1070.644791[-0.003703];1070.619614[0.021474]	EAGDQLVVLK/;AIRDEKVLK/;QEVEVKVKI/;EKTLLINQL/;SVSVVINIIQ/;TSPVTVQVIK/;EQDLAVGLAR/;AAQGTGVKVIK/;KRADNKVLQ/	39.760000;34.340000;30.190000;29.020000;28.170000;27.920000;27.530000;25.340000;24.970000	0.000106;0.000368;0.000957;0.001253;0.001524;0.001614;0.001766;0.002924;0.000000	5.420000;4.150000;1.170000;0.850000;0.250000;0.390000;2.190000;0.370000;NA	0.000454626942;0.000130513420;0.000050194389;0.000038340270;0.000031525005;0.000029761524;0.000027205403;0.000016430666;0.000015088816	0.001975;0.000567;0.000218;0.000167;0.000137;0.000129;0.000118;0.000071;0.000066
query4538	646.812	1291.61	2	1291.6	0.005041	Y	DLDFKNPNSDK	S			73.18	1	0	gi|00924	49.29	0.999967	44.8132	131007_Sam_Standard_03_p.02567.02567.2	1291.604462[0.005010];1291.665939[-0.056467];1291.702362[-0.092890];1291.608475[0.000997];1291.619003[-0.009531];1291.663300[-0.053828];1291.652054[-0.042582];1291.652069[-0.042597];1291.699692[-0.090220]	AGGTGTDNTSIWL/;KKYAELSEPID/;KQSTDEFILVI/;VEDKFGSWPEV/;KSQSEMENAIR/;GARFAGGGQKKTD/;DIDGAFVAKNSR/;DIDFPRTSVRS/;QNTGLGTRVHPL/	23.890000;19.400000;18.310000;17.820000;17.780000;17.510000;17.480000;14.720000;13.860000	0.004083;0.011482;0.014757;0.016520;0.016672;0.017742;0.017865;0.033729;0.000000	4.490000;1.090000;0.490000;0.040000;0.270000;0.030000;2.760000;0.860000;NA	0.000011775671;0.000004187797;0.000003258259;0.000002910621;0.000002883936;0.000002710102;0.000002691446;0.000001425561;0.000001169461	0.000051;0.000018;0.000014;0.000013;0.000013;0.000012;0.000012;0.000006;0.000005
query423	437.264	872.514	2	872.508	0.00649	I	LGVSLAASR	A			72.8	1	0	gi|00924	29.87	0.997123	25.41	131007_Sam_Standard_02_p.03723.03723.2	872.471558[0.042882];872.507935[0.006505];872.471558[0.042882];872.471573[0.042867];872.460358[0.054082];872.471573[0.042867];872.496735[0.017705];872.533096[-0.018656];872.423935[0.090505]	IQDLASAR/;LATALAASR/;LGVAEARAS/;IGDALTQR/;IGDALTQVG/;LGADIARGT/;VAVSALSAGV/;LDKLAKSV/;LNELAEGQ/	42.930000;41.330000;36.960000;36.830000;35.270000;35.210000;34.470000;30.970000;30.970000	0.000051;0.000074;0.000201;0.000207;0.000297;0.000301;0.000357;0.000800;0.000000	1.600000;4.370000;0.130000;1.560000;0.060000;0.740000;3.500000;0.000000;NA	0.001027421301;0.000710801876;0.000259865464;0.000252202023;0.000176095625;0.000173679502;0.000146469961;0.000065425728;0.000065425728	0.004464;0.003088;0.001129;0.001095;0.000765;0.000754;0.000636;0.000284;0.000284
query5910	708.867	1415.72	2	1415.71	0.004216	R	GNPTVEVELTTEK	G			72.74	1	0	gi|00924	66.02	0.999999	59.8269	131007_Sam_Standard_02_p.02851.02851.2	1415.679337[0.039265];1415.686523[0.032079];1415.693222[0.025380];1415.707855[0.010747];1415.723114[-0.004512];1415.798386[-0.079784];1415.795853[-0.077251];1415.761993[-0.043391];1415.799713[-0.081111]	GNKQVAVSGWQEN/;NGAQARRDNLSSAG/;SLYVKENNLSSY/;LGAQVTEGLAQQAM/;NVRVMPESIPAGF/;LGSLVGAGIGALSSSK/;IGPNLKKPYMKQ/;SVGAIAVKEKGDDK/;EIKNIVRHGIHT/	6.720000;4.110000;3.700000;3.430000;3.040000;2.630000;1.180000;1.160000;1.040000	0.212814;0.388150;0.426580;0.453942;0.496592;0.545758;0.762079;0.765597;0.000000	2.610000;0.410000;0.270000;0.390000;0.410000;1.450000;0.020000;0.120000;NA	0.000000250034;0.000000137088;0.000000124738;0.000000117219;0.000000107152;0.000000097499;0.000000069823;0.000000069502;0.000000067608	0.000001;0.000001;0.000001;0.000001;0.000000;0.000000;0.000000;0.000000;0.000000
query5218	678.345	1354.68	2	1354.67	0.008413	R	DYYFALAHTVR	D			72.42	1	0	gi|00489	57.49	0.999994	52.0392	131007_Sam_Standard_01_p.03816.03816.2	1354.713242[-0.037852];1354.672821[0.002569];1354.600098[0.075292];1354.764236[-0.088846];1354.728500[-0.053110];1354.699356[-0.023966];1354.676849[-0.001459];1354.678406[-0.003016];1354.713272[-0.037882]	ADLPWIAESIQL/;EERPAAIEIDNV/;ASDTHAVDVNPTE/;NVQIGALANVIIM/;YYGKAPLVKGYP/;FRGDIQVRTYT/;QYSLPASGKYEL/;GCLLWPPFYFL/;AVDISPLAVDWGL/	14.930000;14.210000;10.710000;9.130000;8.520000;8.180000;8.140000;7.770000;7.430000	0.032137;0.037931;0.084918;0.122180;0.140605;0.152055;0.153462;0.167109;0.000000	0.720000;3.500000;1.580000;0.610000;0.340000;0.040000;0.370000;0.340000;NA	0.000001782368;0.000001510071;0.000000674524;0.000000468810;0.000000407378;0.000000376701;0.000000373248;0.000000342766;0.000000316955	0.000008;0.000007;0.000003;0.000002;0.000002;0.000002;0.000002;0.000001;0.000001
query5263	679.324	1356.63	2	1356.62	0.013021	A	VFAGENFHHGDK	L			72.36	1	0	gi|00924	55.31	0.999994	52.2807	131007_Sam_Standard_01_p.03277.03277.2	1356.635025[-0.000895];1356.546967[0.087163];1356.631882[0.002248];1356.682190[-0.048060];1356.617264[0.016866];1356.583389[0.050741];1356.605362[0.028768];1356.703735[-0.069605];1356.634995[-0.000865]	VFANWFSDATSL/;FAEDIYDEQNN/;VFASGTWCRMTV/;VFAVVMFVDMIS/;VFQHPLYTYSC/;FAVGEEDQFSTAG/;MSEHPVDLMAID/;AFLEQHKEKLD/;VFSLSWYNEAAA/	17.050000;9.730000;9.560000;9.560000;7.420000;7.030000;6.640000;6.580000;5.960000	0.019724;0.106414;0.110662;0.110662;0.181134;0.198153;0.216770;0.219786;0.000000	7.320000;0.170000;0.000000;2.140000;0.390000;0.390000;0.060000;0.620000;NA	0.000002944404;0.000000545755;0.000000524804;0.000000524804;0.000000320625;0.000000293088;0.000000267915;0.000000264239;0.000000229085	0.000013;0.000002;0.000002;0.000002;0.000001;0.000001;0.000001;0.000001;0.000001
query1846	527.757	1053.5	2	1053.48	0.022512	R	TNFDAFPDK	V			72.35	1	0	gi|00489	47.44	0.999972	45.4897	131007_Sam_Standard_03_p.02756.02756.2	1053.520309[-0.021067];1053.516479[-0.017237];1053.440353[0.058889];1053.520309[-0.021067];1053.480103[0.019139];1053.472687[0.026555];1053.436325[0.062917];1053.527725[-0.028483];1053.443710[0.055532]	TNAHAVAKDQ/;KSFDSVIMQ/;TNFDWGSDL/;TLNKHAAGDQ/;SGALFTDMNV/;QSYKNAQTD/;QSSGTFEQGN/;QSTFLVCTR/;QSDYPTCLQ/	24.910000;16.450000;14.970000;14.000000;12.380000;12.190000;11.970000;11.970000;9.810000	0.003228;0.022646;0.031842;0.039811;0.057810;0.060395;0.063533;0.063533;0.000000	8.460000;1.480000;0.970000;1.620000;0.190000;0.220000;0.000000;2.160000;NA	0.000018029668;0.000002570323;0.000001828049;0.000001462136;0.000001006903;0.000000963802;0.000000916195;0.000000916195;0.000000557170	0.000078;0.000011;0.000008;0.000006;0.000004;0.000004;0.000004;0.000004;0.000002
query2670	567.298	1132.58	2	1132.57	0.009496	S	VSEAAIEASTR	Y			70.6	1	0	gi|00330	38.85	0.999746	35.9594	131007_Sam_Standard_01_p.01775.01775.2	1132.597565[-0.015681];1132.522278[0.059606];1132.524796[0.057088];1132.562500[0.019384];1132.591019[-0.009135];1132.598419[-0.016535];1132.572403[0.009481];1132.572388[0.009496];1132.524796[0.057088]	GTEAVLKTEVS/;WEAAASIGMTP/;GETAVIENDVS/;ASEVAHQLHAA/;RMVAAELSSAV/;ALMALTGAVCLA/;LDSASALSDRV/;ARETLSASLAD/;LSVSSADGETPA/	31.750000;25.730000;25.340000;23.690000;21.440000;19.990000;19.430000;18.500000;18.330000	0.000668;0.002673;0.002924;0.004276;0.007178;0.010023;0.011402;0.014125;0.000000	6.020000;0.390000;1.650000;2.250000;1.450000;0.560000;0.930000;0.170000;NA	0.000130283636;0.000032575409;0.000029777612;0.000020365256;0.000012130812;0.000008687401;0.000007636421;0.000006164387;0.000005927750	0.000566;0.000141;0.000129;0.000088;0.000053;0.000038;0.000033;0.000027;0.000026
query2741	571.865	1141.72	2	1141.71	0.008397	K	KQTALVELLK	H			69.9	1	0	gi|02769	35.12	0.999512	33.114	131007_Sam_Standard_03_p.03484.03484.2	1141.754654[-0.039226];1141.678040[0.037388];1141.652893[0.062535];1141.620346[0.095082];1141.659409[0.056019];1141.718277[-0.002849];1141.631760[0.083668];1141.645508[0.069920];1141.671982[0.043446]	AGKTVKKGLIK/;IMLAIDLLLQ/;EPMGVIIQKK/;AGIDRAGNLQK/;ELDGILELIK/;KQTGKKVAIIG/;KFMHPELIK/;KKGDVIIGANQ/;KRGNQWLLK/	34.780000;29.100000;23.400000;23.090000;21.570000;21.220000;20.490000;18.960000;18.140000	0.000333;0.001230;0.004571;0.004909;0.006966;0.007551;0.008933;0.012706;0.000000	5.680000;5.700000;0.310000;1.520000;0.350000;0.730000;1.530000;0.820000;NA	0.000307459507;0.000083135771;0.000022376282;0.000020834732;0.000014682092;0.000013545278;0.000011449537;0.000008049853;0.000006664812	0.001335;0.000361;0.000097;0.000090;0.000064;0.000059;0.000050;0.000035;0.000029
query2049	537.281	1072.55	2	1072.54	0.006918	V	ADDLTVTNPK	R			69.88	1	0	gi|00924	41.51	0.999769	36.3663	131007_Sam_Standard_02_p.04340.04340.2	1072.612839[-0.065867];1072.577759[-0.030787];1072.585159[-0.038187];1072.598892[-0.051920];1072.511047[0.035925];1072.518921[0.028051];1072.631424[-0.084452];1072.631424[-0.084452];1072.591690[-0.044718]	TVTLTVKPTN/;SARSRTLPW/;RSVKGMLPW/;EGIDTVRRK/;ADDLMAEVIP/;SAQQFPLEGP/;TAKNLMLVIA/;ASAKAVMVLIA/;VSDLHIKVY/	28.370000;27.330000;24.770000;23.500000;21.510000;20.360000;19.980000;19.050000;18.100000	0.001455;0.001849;0.003334;0.004467;0.007063;0.009204;0.010046;0.012445;0.000000	1.040000;2.560000;1.270000;1.990000;1.150000;0.380000;0.930000;0.950000;NA	0.000070615449;0.000055577592;0.000030824761;0.000023009105;0.000014551231;0.000011166054;0.000010230567;0.000008258472;0.000006635898	0.000307;0.000241;0.000134;0.000100;0.000063;0.000048;0.000044;0.000036;0.000029
query2818	576.779	1151.54	2	1151.53	0.009892	I	VNMLMHHDR	F			69.87	1	0	gi|00489	47.54	0.999967	44.7503	131007_Sam_Standard_01_p.03979.03979.2	1151.546738[-0.004040];1151.589661[-0.046963];1151.532135[0.010563];1151.604706[-0.062008];1151.564468[-0.021770];1151.618637[-0.075939];1151.564514[-0.021816];1151.553253[-0.010555];1151.572357[-0.029659]	GRMLMFPVSD/;VNMLVTLDTF/;VNMLWFDDL/;VNELHNTGLR/;NVMIIYRED/;GILDAGPATGALP/;VGGMYGVAQGTL/;VDGYEMLVNI/;EPWVTIHDR/	22.330000;14.130000;14.130000;13.930000;13.810000;12.840000;11.200000;10.270000;10.210000	0.005848;0.038637;0.038637;0.040458;0.041591;0.052000;0.075858;0.093972;0.000000	8.200000;0.000000;0.200000;0.120000;0.970000;1.640000;0.930000;0.060000;NA	0.000017619170;0.000002666769;0.000002666769;0.000002546745;0.000002477339;0.000001981461;0.000001358268;0.000001096441;0.000001081398	0.000077;0.000012;0.000012;0.000011;0.000011;0.000009;0.000006;0.000005;0.000005
query2108	539.301	1076.59	2	1076.58	0.011036	Y	YFALAHTVR	D			69.53	1	0	gi|00489	46.25	0.999963	44.3116	131007_Sam_Standard_03_p.03760.03760.2	1076.532440[0.055302];1076.609055[-0.021313];1076.565475[0.022267];1076.517838[0.069904];1076.561447[0.026295];1076.623001[-0.035259];1076.586563[0.001179];1076.550186[0.037556];1076.575363[0.012379]	LMHLAASAYT/;GRAARALVYT/;YFAHGAVLSI/;LDWPAAIYE/;NPVALGQEIH/;VGVQAKIVTY/;NAAAALASYIL/;ALGLNNIAEY/;LPTTGIIAEY/	23.280000;13.930000;13.710000;11.290000;11.170000;10.890000;10.740000;10.330000;10.020000	0.004699;0.040458;0.042560;0.074302;0.076384;0.081470;0.084333;0.092683;0.000000	9.350000;0.220000;2.420000;0.120000;0.280000;0.150000;0.410000;0.310000;NA	0.000023712858;0.000002754127;0.000002618086;0.000001499629;0.000001458760;0.000001367678;0.000001321247;0.000001202220;0.000001119396	0.000103;0.000012;0.000011;0.000007;0.000006;0.000006;0.000006;0.000005;0.000005
query192	418.735	835.455	2	835.444	0.011526	K	IGDYAGIK	W			69.38	1	0	gi|00330	19.98	0.989612	19.8347	131007_Sam_Standard_02_p.02007.02007.2	835.418823[0.036657];835.462585[-0.007105];835.443954[0.011526];835.389816[0.065664];835.462585[-0.007105];835.407593[0.047887];835.426208[0.029272];835.407578[0.047902];835.443954[0.011526]	LGDPHGLQ/;LGAMFGKI/;IATYQQL/;IGDSKMW/;IGKMFIAG/;LGDTFVAN/;IGAMFLGQ/;AYGDGLQL/;GLDKYQI/	49.400000;32.630000;28.580000;25.930000;24.140000;23.770000;22.830000;21.380000;21.350000	0.000011;0.000546;0.001387;0.002553;0.003855;0.004198;0.005212;0.007278;0.000000	16.770000;4.050000;2.650000;1.790000;0.370000;0.940000;1.450000;0.030000;NA	0.009941798938;0.000209153423;0.000082312345;0.000044716209;0.000029611811;0.000027193492;0.000021901052;0.000015684294;0.000015576324	0.043393;0.000908;0.000357;0.000194;0.000129;0.000118;0.000095;0.000068;0.000068
query1467	507.82	1013.63	2	1013.61	0.013996	K	QTALVELLK	H			69.07	1	0	gi|02769	33.15	0.998908	29.6171	131007_Sam_Standard_01_p.04262.04262.2	1013.590942[0.035130];1013.557938[0.068134];1013.539322[0.086750];1013.594315[0.031757];1013.550568[0.075504];1013.550552[0.075520];1013.696075[-0.070003];1013.554565[0.071507];1013.612076[0.013996]	KTWPEIIK/;GGDALIPMLK/;QEGVLDIIQ/;KVGEPMILK/;KDGIVQQVGA/;GAATLNVQLQ/;KTVKKGLIK/;NWLIDLAVA/;VSNLEVIKL/	35.920000;32.910000;29.190000;27.870000;25.530000;25.260000;25.050000;24.050000;24.050000	0.000256;0.000512;0.001205;0.001633;0.002799;0.002979;0.003126;0.003936;0.000000	3.010000;3.720000;1.320000;2.340000;0.270000;0.210000;1.000000;0.000000;NA	0.000483643568;0.000241838486;0.000102689353;0.000075774908;0.000044210499;0.000041545636;0.000039584523;0.000031443104;0.000031443104	0.002101;0.001050;0.000446;0.000329;0.000192;0.000180;0.000172;0.000137;0.000137
query5784	702.864	1403.71	2	1403.68	0.036139	D	SFAAGWGVMVSHR	S			69.07	1	0	gi|00924	43.09	0.999936	41.9403	131007_Sam_Standard_01_p.04288.04288.2	1403.707840[0.005148];1403.707840[0.005148];1403.707840[0.005148];1403.729675[-0.016687];1403.623825[0.089163];1403.740845[-0.027857];1403.730301[-0.017313];1403.668106[0.044882];1403.802399[-0.089411]	ESLNIEVSVAGRM/;DVKTICEQEARI/;GTERLAEVVEKCA/;FGTGVLGTDLNTPI/;QPEAMEVSNLESA/;ERASLEIIQQAF/;EVNSKSGRAVAMR/;QSFDAVEALGRDP/;FASNTTLLILLQA/	25.980000;14.740000;12.160000;11.790000;11.370000;10.930000;10.660000;10.250000;10.200000	0.002523;0.033574;0.060814;0.066222;0.072946;0.080724;0.085901;0.094406;0.000000	11.240000;2.580000;0.370000;0.420000;0.440000;0.270000;0.410000;0.050000;NA	0.000049087647;0.000003689540;0.000002036912;0.000001870562;0.000001698135;0.000001534519;0.000001442023;0.000001312116;0.000001297096	0.000213;0.000016;0.000009;0.000008;0.000007;0.000007;0.000006;0.000006;0.000006
query8329	820.477	1638.94	2	1638.93	0.008337	R	KVPQVSTPTLVEVSR	S			69.03	1	0	gi|02769	55.16	0.999988	49.3448	131007_Sam_Standard_03_p.03103.03103.2	1638.868896[0.069922];1638.857697[0.081121];1638.861679[0.077139];1638.989273[-0.050455];1638.956955[-0.018137];1638.943024[-0.004206];1638.966827[-0.028009];1638.877640[0.061178];1638.970871[-0.032053]	NLPKVGNEVRNAIES/;QPNLLTGLNTLGGNLD/;QVDEALELYKRYL/;KPVSAAKRRGLLKSE/;KVALTIGRLVQAGAWG/;VQPGARVRWSKISR/;NLPRGTIKATLLIET/;QPVRARQCWAQLIA/;GGILATLPSGWIIKLT/	13.870000;12.980000;10.050000;9.560000;8.960000;7.920000;7.590000;7.150000;6.650000	0.041020;0.050350;0.098855;0.110662;0.127057;0.161436;0.174181;0.192752;0.000000	0.890000;2.930000;0.490000;0.600000;1.040000;0.330000;0.440000;0.500000;NA	0.000003047860;0.000002483104;0.000001264722;0.000001129783;0.000000984000;0.000000774453;0.000000717786;0.000000648627;0.000000578089	0.000013;0.000011;0.000005;0.000005;0.000004;0.000003;0.000003;0.000003;0.000003
query306	426.234	850.454	2	850.444	0.010808	A	EFVEVTK	L			68.33	1	0	gi|02769	20.54	0.988837	19.5223	131007_Sam_Standard_03_p.02119.02119.2	850.374222[0.080220];850.480011[-0.025569];850.443634[0.010808];850.443619[0.010823];850.443634[0.010808];850.443619[0.010823];850.443634[0.010808];850.407257[0.047185];850.407242[0.047200]	EMDEVTK/;YIVEVKT/;IYVDLTQ/;LYVESLQ/;YLVETVQ/;EVFELSK/;IFDEVKT/;IFDEVQT/;EFVNELT/	47.790000;40.410000;31.320000;31.160000;31.160000;30.380000;23.970000;23.970000;22.680000	0.000017;0.000091;0.000738;0.000766;0.000766;0.000916;0.004009;0.004009;0.000000	7.380000;9.090000;0.160000;0.000000;0.780000;6.410000;0.000000;1.290000;NA	0.008732222708;0.001596337822;0.000196845188;0.000189725106;0.000189725106;0.000158534871;0.000036234711;0.000036234711;0.000026923084	0.038090;0.006938;0.000855;0.000824;0.000824;0.000689;0.000157;0.000157;0.000117
query3433	609.834	1217.65	2	1217.64	0.010122	R	MSLVEEGAVKR	I			68.33	1	0	gi|00489	47.42	0.999882	39.2681	131007_Sam_Standard_02_p.02110.02110.2	1217.575027[0.078879];1217.654373[-0.000467];1217.665573[-0.011667];1217.650314[0.003592];1217.571014[0.082892];1217.643768[0.010138];1217.706009[-0.052103];1217.662430[-0.008524];1217.640427[0.013479]	MSLHFEAAAIE/;VDVVFVDLAEI/;FIAAQAGLDLLS/;IATTNSGELLSL/;SMLPETEQQR/;IASMREQALLS/;VPFSVFPIISL/;AIRVCNMVIVT/;GRGIYEGPGISI/	20.910000;20.910000;20.320000;19.640000;19.230000;18.900000;18.340000;18.210000;18.040000	0.008110;0.008110;0.009290;0.010864;0.011940;0.012882;0.014655;0.015101;0.000000	0.000000;0.590000;0.680000;0.410000;0.330000;0.560000;0.130000;0.170000;NA	0.000018111257;0.000018111257;0.000015810609;0.000013519125;0.000012301232;0.000011401148;0.000010021866;0.000009726321;0.000009352950	0.000079;0.000079;0.000069;0.000059;0.000053;0.000050;0.000044;0.000042;0.000041
query6311	724.411	1446.81	2	1446.8	0.009756	K	VVGLSTLPEIYEK	M			68.18	1	0	gi|00330	50.42	0.999977	46.3226	131007_Sam_Standard_01_p.04410.04410.2	1446.748032[0.058706];1446.833389[-0.026651];1446.783051[0.023687];1446.808243[-0.001505];1446.717712[0.089026];1446.736313[0.070425];1446.783081[0.023657];1446.783081[0.023657];1446.855804[-0.049066]	ALGVGPGRNWAHVN/;VAIATLVDILFTTA/;VRIVEAQQLASAY/;GIEVGTLPGQPAVIP/;VVQMVSTAAVQEW/;VKLCCYEGLLLGH/;AAVVIGTEIFGRNT/;GLPVSGHATATLNLP/;KEIAKQAAGPLPPK/	17.760000;14.240000;11.290000;10.850000;10.110000;9.540000;8.840000;8.750000;8.510000	0.016749;0.037670;0.074302;0.082224;0.097499;0.111173;0.130617;0.133352;0.000000	3.520000;2.950000;0.440000;0.740000;0.570000;0.700000;0.090000;0.240000;NA	0.000009077994;0.000004036360;0.000002046397;0.000001849225;0.000001559516;0.000001367697;0.000001164099;0.000001140223;0.000001078922	0.000039;0.000018;0.000009;0.000008;0.000007;0.000006;0.000005;0.000005;0.000005
query7494	783.389	1564.76	2	1564.77	-0.009868	I	GEEYISDLDQLRK	L			68.08	1	0	gi|00489	52.65	0.999976	46.2777	131007_Sam_Standard_02_p.03936.03936.2	1564.791901[-0.028499];1564.798416[-0.035014];1564.780685[-0.017283];1564.763382[0.000020];1564.693298[0.070104];1564.774124[-0.010722];1564.798431[-0.035029];1564.725632[0.037770];1564.861282[-0.097880]	ISDYLGANGKGLMLN/;DSLYLLKNTEEIQ/;YIDSLGAGEVVAIMQ/;EGEYSRITRAPTW/;GEEYSSLTEYQFI/;EGEYRVPAAKMLAM/;GEYELNTGKVIIET/;EGYELDAEEREIL/;DAKNKKAFSPYILA/	15.430000;13.490000;12.710000;12.680000;11.310000;11.220000;10.210000;10.030000;9.850000	0.028642;0.044771;0.053580;0.053951;0.073961;0.075509;0.095280;0.099312;0.000000	1.940000;0.780000;0.030000;1.370000;0.090000;1.010000;0.180000;0.180000;NA	0.000005432375;0.000003475280;0.000002903954;0.000002883964;0.000002103729;0.000002060581;0.000001633013;0.000001566714;0.000001503107	0.000024;0.000015;0.000013;0.000013;0.000009;0.000009;0.000007;0.000007;0.000007
query6721	746.4	1490.79	2	1490.79	-0.005457	K	LPLVGGHEGAGVVVGM	G			68.05	1	0	gi|00330	51.04	0.999977	46.3264	131007_Sam_Standard_01_p.04391.04391.2	1490.809311[-0.023203];1490.772934[0.013174];1490.864273[-0.078165];1490.870834[-0.084726];1490.726822[0.059286];1490.728638[0.057470];1490.787659[-0.001551];1490.755142[0.030966];1490.856918[-0.070810]	AGRISGSTPFIVVTS/;WQSREVTTVVVTS/;YLQVLGLKLSAMR/;VAYVKQTALVVITS/;SWFVYLQYVVGM/;AMAKQSEVLDIDTA/;QYLILPGLAEMLM/;RTFVLGSNAMPAVE/;RDVKRVGYLVVST/	17.010000;13.390000;13.300000;12.430000;9.900000;9.810000;8.570000;8.180000;6.690000	0.019907;0.045814;0.046774;0.057148;0.102329;0.104472;0.138995;0.152055;0.000000	3.620000;0.090000;0.870000;2.530000;0.090000;1.240000;0.390000;1.490000;NA	0.000007870275;0.000003419715;0.000003349576;0.000002741510;0.000001531052;0.000001499650;0.000001127171;0.000001030362;0.000000731122	0.000034;0.000015;0.000015;0.000012;0.000007;0.000007;0.000005;0.000004;0.000003
query2887	580.32	1158.62	2	1158.6	0.021184	R	IGSEVYHNLK	S			68	1	0	gi|00924	37.11	0.999717	35.4795	131007_Sam_Standard_02_p.01791.01791.2	1158.551651[0.072835];1158.649582[-0.025096];1158.617935[0.006551];1158.643051[-0.018565];1158.660812[-0.036326];1158.683487[-0.059001];1158.588028[0.036458];1158.614548[0.009938];1158.581528[0.042958]	IGSENAEQALQ/;VAESLTEIGKL/;IGMGVRDGGGLK/;ESGRIMIIGAI/;LGTDKGKAEKI/;IGLCFVIPGIK/;EKEVEDAARL/;LGKSRGDWLQ/;ICAVNVREQQ/	30.890000;21.220000;21.210000;18.820000;18.180000;17.430000;15.730000;15.360000;14.170000	0.000815;0.007551;0.007568;0.013122;0.015205;0.018072;0.026730;0.029107;0.000000	9.670000;0.010000;2.390000;0.640000;0.750000;1.700000;0.370000;1.190000;NA	0.000194480921;0.000020983455;0.000020935195;0.000012074718;0.000010420223;0.000008767525;0.000005927574;0.000005443485;0.000004138824	0.000845;0.000091;0.000091;0.000052;0.000045;0.000038;0.000026;0.000024;0.000018
query4816	660.345	1318.68	2	1318.67	0.003164	N	VSVSEAAIEASTR	Y			67.86	1	0	gi|00330	48.67	0.999958	43.7303	131007_Sam_Standard_03_p.02757.02757.2	1318.618698[0.057302];1318.680222[-0.004222];1318.641357[0.034643];1318.688126[-0.012126];1318.598221[0.077779];1318.724487[-0.048487];1318.688110[-0.012110];1318.676849[-0.000849];1318.625214[0.050786]	DAGEEALTQVRM/;ASSLMGSIAGIAEL/;VGLCLSAISCAWP/;SGQQTAAQIFGLV/;WAPFAPGEANYP/;LATSARATIFTPA/;ADTYQVIRPVAS/;SAFAQSEPELKL/;ASIKEDEIQEGT/	19.190000;14.740000;14.500000;14.370000;14.070000;13.050000;12.500000;11.520000;11.080000	0.012050;0.033574;0.035481;0.036559;0.039174;0.049545;0.056234;0.070469;0.000000	4.450000;0.240000;0.130000;0.300000;1.020000;0.550000;0.980000;0.440000;NA	0.000013582559;0.000004875078;0.000004612980;0.000004476943;0.000004178127;0.000003303555;0.000002910594;0.000002322638;0.000002098851	0.000059;0.000021;0.000020;0.000019;0.000018;0.000014;0.000013;0.000010;0.000009
query8797	839.932	1677.85	2	1677.86	-0.008356	R	IGEEYISDLDQLRK	L			67.52	1	0	gi|00489	54.06	0.999982	47.5645	131007_Sam_Standard_01_p.03956.03956.2	1677.791977[0.056997];1677.763458[0.085516];1677.857330[-0.008356];1677.795822[0.053152];1677.852158[-0.003184];1677.930145[-0.081171];1677.934128[-0.085154];1677.799164[0.049810];1677.767456[0.081518]	GEELETLCNAGIPFSV/;WLETDSNKDSWQGL/;GEEYISDLDQLRKL/;NEGQYLTGTVGPERSA/;DARLHHIMLDIHHA/;VSVQKVADFLAVSKST/;EIGTILKAFNYPISL/;NLSNATNQMIEGTAKS/;VSEIYQYYKEHGY/	13.460000;12.890000;12.020000;11.070000;8.030000;8.030000;7.610000;7.300000;6.800000	0.045082;0.051404;0.062806;0.078163;0.157398;0.157398;0.173380;0.186209;0.000000	0.570000;0.870000;0.950000;3.040000;0.000000;0.420000;0.310000;0.500000;NA	0.000003926381;0.000003443439;0.000002818334;0.000002264605;0.000001124585;0.000001124585;0.000001020922;0.000000950588;0.000000847213	0.000017;0.000015;0.000012;0.000010;0.000005;0.000005;0.000004;0.000004;0.000004
query5415	686.34	1370.66	2	1370.64	0.028143	V	FAGENFHHGDKL	X			67.46	1	0	gi|00924	48.32	0.999949	42.9376	131007_Sam_Standard_03_p.03653.03653.2	1370.621017[0.043875];1370.683701[-0.018809];1370.759827[-0.094935];1370.640106[0.024786];1370.729294[-0.064402];1370.690216[-0.025324];1370.683884[-0.018992];1370.665268[-0.000376];1370.613632[0.051260]	VSNLYGMVTGMAE/;SMGRHIQSQRAT/;LSFGAFFIGLKAT/;FAMVRYDRAADG/;QTLLLPESAADIT/;GRLQNQNEQLAT/;FAMFQDIKRIC/;FRAGFSGLMIDAS/;TTGDAIYMRGADT/	19.140000;18.040000;15.470000;13.870000;12.530000;12.530000;11.860000;11.480000;11.060000	0.012190;0.015704;0.028379;0.041020;0.055847;0.055847;0.065163;0.071121;0.000000	1.100000;2.570000;1.600000;1.340000;0.000000;0.670000;0.380000;0.420000;NA	0.000014722376;0.000011428202;0.000006323797;0.000004374999;0.000003213497;0.000003213497;0.000002754089;0.000002523352;0.000002290751	0.000064;0.000050;0.000027;0.000019;0.000014;0.000014;0.000012;0.000011;0.000010
query7237	770.881	1539.75	2	1539.76	-0.008646	S	YVDDEAFIRDVAK	V			67.23	1	0	gi|00489	56.63	0.99999	49.7929	131007_Sam_Standard_03_p.04687.04687.2	1539.738968[0.009298];1539.717377[0.030889];1539.723892[0.024374];1539.694885[0.053381];1539.754425[-0.006159];1539.696701[0.051565];1539.752869[-0.004603];1539.709244[0.039022];1539.710175[0.038091]	RGGSHSGNVAASELAQ/;YVDNTRIGAMGICAG/;YAQIGVESAVMSASQ/;MYNGINELIDDLM/;YVMVFSDWRQLP/;GHWEEWRDRAAQ/;KAAAAGASGYSITSATN/;YSELEEEWKAEK/;FLPDIYVPCDQCK/	10.600000;10.310000;9.340000;7.240000;6.610000;6.600000;6.250000;5.120000;4.310000	0.087096;0.093111;0.116413;0.188799;0.218273;0.218776;0.237137;0.307610;0.000000	0.290000;0.970000;2.100000;0.630000;0.010000;0.350000;1.130000;0.810000;NA	0.000002172678;0.000002032336;0.000001625532;0.000001002295;0.000000866953;0.000000864959;0.000000797986;0.000000615170;0.000000510500	0.000009;0.000009;0.000007;0.000004;0.000004;0.000004;0.000003;0.000003;0.000002
query4009	629.789	1257.56	2	1257.55	0.011129	V	FAGENFHHGDK	L			67.15	1	0	gi|00924	48.24	0.999952	43.1486	131007_Sam_Standard_01_p.03274.03274.2	1257.566605[-0.002787];1257.624115[-0.060297];1257.577850[-0.014032];1257.573807[-0.009989];1257.617584[-0.053766];1257.594894[-0.031076];1257.551315[0.012503];1257.631287[-0.067469];1257.581223[-0.017405]	FANWFSDATSL/;KYTAEDKFGVT/;AIGDVHFGWQE/;ELRGHEQDFQ/;FAGKPMYRTST/;QGANAEAAKAAGAE/;EYADKDNLYGA/;QAAERALNSVEA/;ERGNTFMFGVT/	18.910000;17.540000;15.140000;13.690000;13.130000;10.380000;9.900000;9.900000;9.850000	0.012853;0.017620;0.030620;0.042756;0.048641;0.091622;0.102329;0.102329;0.000000	1.370000;2.400000;1.450000;0.560000;2.750000;0.480000;0.000000;0.050000;NA	0.000014996122;0.000010939034;0.000006294757;0.000004507949;0.000003962588;0.000002103677;0.000001883558;0.000001883558;0.000001861997	0.000065;0.000048;0.000027;0.000020;0.000017;0.000009;0.000008;0.000008;0.000008
query3201	596.807	1191.6	2	1191.6	0.002707	L	QEFMIAPTGAK	T			67.07	1	0	gi|00924	41.41	0.999831	37.7137	131007_Sam_Standard_02_p.03063.03063.2	1191.628799[-0.030313];1191.613541[-0.015055];1191.613541[-0.015055];1191.599609[-0.001123];1191.636002[-0.037516];1191.624771[-0.026285];1191.668533[-0.070047];1191.526382[0.072104];1191.570633[0.027853]	EKFLTWLGAAG/;KTKWDELTAT/;TREDFALVIE/;QLYNRAGAAQT/;KYLGVNRANGT/;KEFTADPKRT/;KGAYKTAPLIM/;QEEMLGLQGGM/;QENRFPIMGT/	25.660000;21.370000;18.350000;17.990000;17.830000;17.400000;16.200000;15.500000;15.190000	0.002716;0.007295;0.014622;0.015885;0.016482;0.018197;0.023988;0.028184;0.000000	4.290000;3.020000;0.360000;0.160000;0.430000;1.200000;0.700000;0.310000;NA	0.000072264745;0.000026910792;0.000013425376;0.000012357382;0.000011910403;0.000010787641;0.000008183262;0.000006965086;0.000006485246	0.000314;0.000117;0.000058;0.000054;0.000052;0.000047;0.000036;0.000030;0.000028
query4741	656.842	1311.67	2	1311.67	-0.002406	R	SIGGEVFIDFTK	E			66.76	1	0	gi|00330	54.2	0.999981	47.1832	131007_Sam_Standard_02_p.04857.04857.2	1311.674423[-0.005747];1311.630676[0.038000];1311.598297[0.070379];1311.714645[-0.045969];1311.751038[-0.082362];1311.685654[-0.016978];1311.660492[0.008184];1311.634705[0.033971];1311.583893[0.084783]	EAGSVLPMEPAVL/;DGAAPLPTDQAGVT/;VEAENFLFTDQ/;ISGEVLRNAISPG/;TVVDKRAEVAPK/;EKSSGAVMFKKT/;AENMKKNPQVGP/;SLGDDVIFATQF/;GEKPMEMAYVGT/	12.560000;12.420000;11.050000;10.650000;9.460000;7.760000;7.590000;7.300000;6.960000	0.055463;0.057280;0.078524;0.086099;0.113240;0.167494;0.174181;0.186209;0.000000	0.140000;1.370000;0.400000;1.190000;1.700000;0.170000;0.290000;0.340000;NA	0.000003801821;0.000003681219;0.000002685293;0.000002449016;0.000001862052;0.000001258901;0.000001210575;0.000001132379;0.000001047109	0.000017;0.000016;0.000012;0.000011;0.000008;0.000005;0.000005;0.000005;0.000005
query1934	531.778	1061.54	2	1061.54	-0.001689	R	MSLVEEGAVK	R			66.46	1	0	gi|00489	26.65	0.997277	25.6494	131007_Sam_Standard_03_p.02509.02509.2	1061.623322[-0.082332];1061.539337[0.001653];1061.590286[-0.049296];1061.623322[-0.082332];1061.550552[-0.009562];1061.539307[0.001683];1061.634537[-0.093547];1061.553894[-0.012904];1061.489212[0.051778]	LSGARFVISL/;LDGTTWGLSI/;MSLLDSRKL/;LVHAPNVLSI/;SRDSWVISL/;YPQENVLSI/;AFLRSRLSI/;SMIVEAEKR/;AFIVMYFDG/	39.810000;26.860000;26.400000;24.520000;24.520000;24.520000;24.160000;24.080000;23.530000	0.000104;0.002061;0.002291;0.003532;0.003532;0.003532;0.003837;0.003908;0.000000	12.950000;0.460000;1.880000;0.000000;0.000000;0.360000;0.080000;0.550000;NA	0.002156829211;0.000109349237;0.000098359374;0.000063799277;0.000063799277;0.000063799277;0.000058724017;0.000057652183;0.000050794391	0.009377;0.000475;0.000427;0.000277;0.000277;0.000277;0.000255;0.000250;0.000221
query4498	644.864	1287.71	2	1287.7	0.009817	K	VNQIGTLSESIK	A			66.42	1	0	gi|00924	43.15	0.999898	39.8932	131007_Sam_Standard_02_p.03021.03021.2	1287.703430[0.009802];1287.678284[0.034948];1287.777496[-0.064264];1287.693512[0.019720];1287.741135[-0.027903];1287.649261[0.063971];1287.788742[-0.075510];1287.729889[-0.016657];1287.624115[0.089117]	VNKLDTATVASLG/;VNKVGDSTNIGGK/;NARLSAFLRLK/;GRKLALAYDPGQ/;RGKLNGIGFAQK/;VQNLGENSAMLL/;AAAKIRHVVRAP/;GRGALPEAKKVY/;VNGASMPQRIES/	23.270000;20.820000;13.410000;13.090000;13.090000;12.220000;11.140000;11.140000;10.430000	0.004710;0.008279;0.045604;0.049091;0.049091;0.059979;0.076913;0.076913;0.000000	2.450000;7.410000;0.320000;0.000000;0.870000;1.080000;0.000000;0.710000;NA	0.000048412275;0.000027539464;0.000004999833;0.000004644677;0.000004644677;0.000003801504;0.000002964528;0.000002964528;0.000002517419	0.000210;0.000120;0.000022;0.000020;0.000020;0.000017;0.000013;0.000013;0.000011
query4066	631.329	1260.64	2	1260.65	-0.007107	D	WDKAWEVTVK	T			66.39	1	0	gi|00489	45.14	0.999901	40.0253	131007_Sam_Standard_01_p.04527.04527.2	1260.705078[-0.061916];1260.634995[0.008167];1260.598618[0.044544];1260.551010[0.092152];1260.631012[0.012150];1260.630966[0.012196];1260.558228[0.084934];1260.594589[0.048573];1260.598633[0.044529]	VSDRFRAALRA/;VAKEYVAAQDPA/;WENAITTQVEA/;EGDYLPDLDPQ/;GEDVAVSRTTVGA/;EGATAAILERGSS/;ADDGSLGAANVNGT/;AETQRDLTAEQ/;DAGEKLWDAVTG/	21.250000;20.670000;17.090000;15.480000;14.020000;13.640000;13.030000;11.560000;11.380000	0.007499;0.008570;0.019543;0.028314;0.039628;0.043251;0.049774;0.069823;0.000000	0.580000;3.580000;1.610000;1.460000;0.380000;0.610000;1.470000;0.180000;NA	0.000030616590;0.000026789020;0.000011747807;0.000008108804;0.000005793711;0.000005308317;0.000004612717;0.000003288189;0.000003154691	0.000133;0.000116;0.000051;0.000035;0.000025;0.000023;0.000020;0.000014;0.000014
query3874	625.845	1249.68	2	1249.67	0.009008	E	YISDLDQLRK	L			66.37	1	0	gi|00489	48.38	0.999934	41.8131	131007_Sam_Standard_03_p.03911.03911.2	1249.696472[-0.020838];1249.677841[-0.002207];1249.655396[0.020238];1249.714249[-0.038615];1249.666611[0.009023];1249.623703[0.051931];1249.645508[0.030126];1249.702988[-0.027354];1249.685257[-0.009623]	YISLQRMAIR/;YLSIRENSLR/;YISLDVADLKN/;IYSTTLRQLR/;YLKNKAALDNT/;YLPRASMEQR/;YLLPFGEQRQ/;IYSSKLAEIAR/;FMSIVEKQLR/	17.990000;16.780000;15.840000;15.250000;14.200000;14.000000;12.700000;12.570000;11.760000	0.015885;0.020989;0.026062;0.029854;0.038019;0.039811;0.053703;0.055335;0.000000	1.210000;0.940000;0.590000;1.050000;0.200000;1.300000;0.130000;0.810000;NA	0.000014520160;0.000010989334;0.000008850573;0.000007726297;0.000006066964;0.000005793905;0.000004295081;0.000004168419;0.000003459166	0.000063;0.000048;0.000038;0.000034;0.000026;0.000025;0.000019;0.000018;0.000015
query1341	500.796	999.577	2	999.571	0.006154	S	LVEEGAVKR	I			66.01	1	0	gi|00489	36.19	0.999302	31.5631	131007_Sam_Standard_02_p.02112.02112.2	999.582489[-0.005061];999.560059[0.017369];999.534882[0.042546];999.534912[0.042516];999.571274[0.006154];999.546112[0.031316];999.546112[0.031316];999.582504[-0.005076];999.571274[0.006154]	LVEEKRRA/;LVETIAAVGQ/;LLDENLQR/;IVENDRVVG/;IVENSIVAR/;LVEAQRER/;LVEQARER/;LVESLQRR/;VIEEGKGRL/	29.820000;25.040000;23.510000;23.370000;23.370000;23.370000;23.370000;23.370000;22.940000	0.001042;0.003133;0.004457;0.004603;0.004603;0.004603;0.004603;0.004603;0.000000	4.780000;1.530000;0.140000;0.000000;0.000000;0.000000;0.000000;0.430000;NA	0.000240268519;0.000079927618;0.000056194896;0.000054412273;0.000054412273;0.000054412273;0.000054412273;0.000054412273;0.000049282970	0.001044;0.000347;0.000244;0.000236;0.000236;0.000236;0.000236;0.000236;0.000214
query6512	734.374	1466.73	2	1466.73	0.004307	C	FSALTPDETYVPK	A			65.67	1	0	gi|02769	43.65	0.999914	40.6617	131007_Sam_Standard_03_p.03443.03443.2	1466.737381[-0.003765];1466.740524[-0.006908];1466.725296[0.008320];1466.690247[0.043369];1466.684875[0.048741];1466.725281[0.008335];1466.740555[-0.006939];1466.747726[-0.014110];1466.761658[-0.028042]	LCATIFNGAISRVC/;EAAFTRLPLYADT/;AAVYDLGNGTSVIST/;HPLATNHQTQYGT/;AQSGNTKSSSLTADT/;NKVTTSSPAYLEGT/;TDFTFRLAPLDAT/;SRLNPQLANEGAPT/;IHPATGISESELLT/	22.020000;18.080000;12.690000;12.580000;12.120000;11.220000;9.850000;9.760000;9.040000	0.006281;0.015560;0.053827;0.055208;0.061376;0.075509;0.103514;0.105682;0.000000	3.940000;5.390000;0.110000;0.460000;0.900000;1.370000;0.090000;0.720000;NA	0.000043148202;0.000017416573;0.000005034574;0.000004908657;0.000004415325;0.000003588911;0.000002617958;0.000002564264;0.000002172515	0.000187;0.000076;0.000022;0.000021;0.000019;0.000016;0.000011;0.000011;0.000009
query884	472.767	943.519	2	943.497	0.021977	R	VLGIDGGEGK	E			65.64	1	0	gi|00330	36.95	0.999615	34.1459	131007_Sam_Standard_01_p.02098.02098.2	943.501480[0.017964];943.533829[-0.014385];943.522614[-0.003170];943.558990[-0.039546];943.497452[0.021992];943.533844[-0.014400];943.533829[-0.014385];943.533829[-0.014385];943.570251[-0.050807]	VLGDLYAPP/;VLGLSKQEA/;VLGISIEDV/;VLGLLLSET/;VIGNNSIDL/;VIGIAGSLTN/;VLATLNKAD/;VLTLANSNI/;VLVVGSSVKG/	28.690000;22.030000;20.060000;20.060000;19.870000;19.220000;17.010000;17.010000;14.490000	0.001352;0.006266;0.009863;0.009863;0.010304;0.011967;0.019907;0.019907;0.000000	6.660000;1.970000;0.000000;0.190000;0.650000;2.210000;0.000000;2.520000;NA	0.000201758938;0.000043534422;0.000027658765;0.000027658765;0.000026474806;0.000022794642;0.000013703540;0.000013703540;0.000007670661	0.000876;0.000189;0.000120;0.000120;0.000115;0.000099;0.000060;0.000060;0.000033
query1633	517.761	1033.51	2	1033.5	0.003941	V	SEAAIEASTR	Y			65.39	1	0	gi|00330	19.26	0.986687	18.7572	131007_Sam_Standard_01_p.01794.01794.2	1033.471619[0.036289];1033.529999[-0.022091];1033.592010[-0.084102];1033.504837[0.003071];1033.592010[-0.084102];1033.503998[0.003910];1033.544388[-0.036480];1033.492752[0.015156];1033.533844[-0.025936]	DTAALAEWSA/;LCAALAATMGL/;HPKIAEAAVV/;CIAMEAGALR/;TDAAFLKRI/;DTRVISEGAS/;ASEAILFING/;GETAILETSN/;MRAIATRDT/	46.130000;36.310000;29.700000;21.270000;21.270000;16.650000;16.490000;16.490000;16.490000	0.000024;0.000234;0.001072;0.007464;0.007464;0.021627;0.022439;0.022439;0.000000	9.820000;6.610000;8.430000;0.000000;4.620000;0.160000;0.000000;0.000000;NA	0.011699823243;0.001219492969;0.000266182378;0.000038210199;0.000038210199;0.000013188011;0.000012710988;0.000012710988;0.000012710988	0.051111;0.005299;0.001156;0.000166;0.000166;0.000057;0.000055;0.000055;0.000055
query7633	789.905	1577.8	2	1577.79	0.001317	K	AVDDFLISLDGTANK	S			64.64	1	0	gi|00924	36.48	0.999561	33.5767	131007_Sam_Standard_03_p.04990.04990.2	1577.812347[-0.017329];1577.885086[-0.090068];1577.848694[-0.053676];1577.885086[-0.090068];1577.746918[0.048100];1577.808273[-0.013255];1577.816147[-0.021129];1577.891617[-0.096599];1577.797729[-0.002711]	MPGVGYLSLLGGGLGTS/;IFMRILEVSTAVSL/;YAVLDVSLGIERMI/;YVSVLENIMVKVGK/;ACYLPLLMSPELDN/;DAIMSSLSITEKRQ/;TERHHLSISGSEIL/;TVIFSILSSLIDSAI/;AALTGELFDIVPEFG/	28.160000;21.190000;20.260000;19.950000;18.290000;17.710000;17.710000;17.630000;16.370000	0.001528;0.007603;0.009419;0.010116;0.014825;0.016943;0.016943;0.017258;0.000000	6.970000;0.930000;0.310000;1.660000;0.580000;0.000000;0.080000;1.260000;NA	0.000224806758;0.000045165764;0.000036459387;0.000033947622;0.000023163776;0.000020267928;0.000020267928;0.000019897997;0.000014887075	0.000976;0.000196;0.000158;0.000147;0.000101;0.000088;0.000088;0.000086;0.000065
query6710	745.395	1488.78	2	1488.76	0.014334	R	LDWDKAWEVTVK	T			64.57	1	0	gi|00489	30.48	0.999052	30.2301	131007_Sam_Standard_03_p.04484.04484.2	1488.732056[0.043554];1488.803558[-0.027948];1488.757248[0.018362];1488.746017[0.029593];1488.818771[-0.043161];1488.739456[0.036154];1488.782394[-0.006784];1488.841232[-0.065622];1488.757248[0.018362]	AKSQDKAWEEAAR/;ITSLDTPVSKTTGGL/;LDDGAPVYERGAVK/;LDQVPDEAFASKAV/;ASSTIGNYILPAVIA/;REENEAVCLWLK/;IDSSKWDVIEKGL/;KAFSERLRSSVPL/;FREAAVSPGIDTLN/	34.090000;19.560000;11.050000;10.580000;9.990000;9.500000;9.210000;8.370000;7.680000	0.000390;0.011066;0.078524;0.087498;0.100231;0.112202;0.119950;0.145546;0.000000	14.530000;8.510000;0.470000;0.590000;0.490000;0.290000;0.840000;0.690000;NA	0.000894515600;0.000031520124;0.000004442096;0.000003986465;0.000003480070;0.000003108765;0.000002907957;0.000002396558;0.000002044504	0.003887;0.000137;0.000019;0.000017;0.000015;0.000014;0.000013;0.000010;0.000009
query303	426.233	850.452	2	850.43	0.022222	I	VGSYVGNR	A			64.35	1	0	gi|00330	32.92	0.998327	27.7649	131007_Sam_Standard_01_p.02416.02416.2	850.454880[-0.002940];850.527649[-0.075709];850.491241[-0.039301];850.429733[0.022207];850.454880[-0.002940];850.454865[-0.002925];850.418472[0.033468];850.480011[-0.028071];850.411957[0.039983]	VGIHVPET/;VGLHVTLL/;RSYVTLI/;RSQTGFGV/;VLGHVTPE/;VSYGVAQK/;DKYVQQA/;KDYVLTL/;VGFCRQAA/	31.430000;31.430000;30.620000;21.790000;20.540000;20.540000;19.400000;19.400000;18.910000	0.000719;0.000719;0.000867;0.006622;0.008831;0.008831;0.011482;0.011482;0.000000	0.000000;0.810000;8.830000;1.250000;0.000000;1.140000;0.000000;0.490000;NA	0.000509650901;0.000509650901;0.000422934191;0.000055369780;0.000041521477;0.000041521477;0.000031935432;0.000031935432;0.000028528097	0.002214;0.002214;0.001837;0.000240;0.000180;0.000180;0.000139;0.000139;0.000124
query6848	750.902	1499.79	2	1499.81	-0.018122	Q	TAEEALDLIVDAIK	A			64.08	1	0	gi|00924	39.36	0.999781	36.59	131007_Sam_Standard_01_p.06409.06409.2	1499.838135[-0.047999];1499.751450[0.038686];1499.844650[-0.054514];1499.798370[-0.008234];1499.798370[-0.008234];1499.819504[-0.029368];1499.834778[-0.044642];1499.819473[-0.029337];1499.826889[-0.036753]	EARMGLLDLITVGL/;TMPTAIRGTDPRAN/;VTETLKLTIPEEK/;TIAVWSILDAINNA/;FEKIPNVNGAEVAL/;EIVTSKIDLNQAVA/;SAWNTLVNLATLVV/;SALEKAQSALAELGI/;VMLALGAETLAEVIA/	24.720000;18.190000;16.670000;15.940000;14.780000;13.780000;13.500000;12.640000;12.640000	0.003373;0.015171;0.021528;0.025468;0.033266;0.041879;0.044668;0.054450;0.000000	6.530000;1.520000;0.730000;1.160000;1.000000;0.280000;0.860000;0.000000;NA	0.000115852326;0.000025757562;0.000018151176;0.000015342805;0.000011746399;0.000009330497;0.000008747919;0.000007176369;0.000007176369	0.000503;0.000112;0.000079;0.000067;0.000051;0.000041;0.000038;0.000031;0.000031
query6941	754.88	1507.75	2	1507.75	-0.005367	G	EEYISDLDQLRK	L			63.57	1	0	gi|00489	48.46	0.999934	41.7996	131007_Sam_Standard_02_p.03942.03942.2	1507.726654[0.019780];1507.720779[0.025655];1507.749146[-0.002712];1507.770477[-0.024043];1507.755188[-0.008754];1507.770432[-0.023998];1507.756714[-0.010280];1507.737900[0.008534];1507.722839[0.023595]	EEYLRRLDDAATG/;EQYNKAFSAHWK/;QRHLQLQQQQSD/;TVAGSVTPNFIMSGK/;SLVNLATTSSMEKQ/;AAKPDKSLYLACTQ/;MVWLFLPSMQKE/;QRYSLNDGEGIRT/;MPTTIEATELFQQ/	15.110000;13.860000;13.620000;12.620000;12.170000;10.190000;9.550000;9.280000;8.960000	0.030832;0.041115;0.043451;0.054702;0.060674;0.095719;0.110917;0.118032;0.000000	1.250000;0.240000;1.000000;0.450000;1.980000;0.640000;0.270000;0.320000;NA	0.000014255134;0.000010689842;0.000010115126;0.000008034730;0.000007243881;0.000004591677;0.000003962518;0.000003723671;0.000003459165	0.000062;0.000046;0.000044;0.000035;0.000031;0.000020;0.000017;0.000016;0.000015
query258	423.233	844.451	2	844.429	0.021795	V	LGIDGGEGK	E			63.36	1	0	gi|00330	25.66	0.980022	16.9946	131007_Sam_Standard_02_p.02117.02117.2	844.501801[-0.050959];844.381439[0.069403];844.454208[-0.003366];844.429047[0.021795];844.469452[-0.018610];844.429062[0.021780];844.447647[0.003195];844.447678[0.003164];844.433060[0.017782]	IGIDKTKA/;IGLDDTPD/;IGLDLTVD/;IGLDQTQA/;LGIDFPLA/;IGIDVTGGN/;IGLAACLNA/;IGIGAMVGAG/;LGDLYAPP/	37.700000;37.700000;37.700000;37.700000;37.700000;36.560000;36.320000;35.340000;34.000000	0.000170;0.000170;0.000170;0.000170;0.000170;0.000221;0.000233;0.000292;0.000000	0.000000;0.000000;0.000000;0.000000;1.140000;0.240000;0.980000;1.340000;NA	0.002662171304;0.002662171304;0.002662171304;0.002662171304;0.002662171304;0.002047556987;0.001937474511;0.001546094367;0.001135627754	0.011577;0.011577;0.011577;0.011577;0.011577;0.008902;0.008423;0.006720;0.004935
query7950	805.44	1608.87	2	1608.86	0.00269	K	VHINPNSLFDVQVK	R			62.87	1	0	gi|00489	45.1	0.999894	39.7501	131007_Sam_Standard_01_p.04194.04194.2	1608.862366[0.002720];1608.888870[-0.023784];1608.814774[0.050312];1608.808243[0.056843];1608.835892[0.029194];1608.866394[-0.001308];1608.852493[0.012593];1608.891571[-0.026485];1608.826004[0.039082]	YETLRVVNERIAF/;VHLPGQYKVHRLY/;YLPVDEGGIPHDGLK/;VHKNPEGVAMGINPF/;LSRTTLSDADSLIAF/;PYLVLFSRLGNYPA/;IRVHTQYAGHPIAF/;VGEVKLFLWSTIAF/;PENTVPQSVPPARAF/	17.770000;16.490000;13.180000;11.880000;11.350000;11.250000;11.250000;11.200000;10.420000	0.016711;0.022439;0.048084;0.064863;0.073282;0.074989;0.074989;0.075858;0.000000	1.280000;3.310000;1.300000;0.530000;0.100000;0.000000;0.050000;0.780000;NA	0.000030899681;0.000023011980;0.000010738757;0.000007960750;0.000007046184;0.000006885794;0.000006885794;0.000006806972;0.000005687927	0.000134;0.000100;0.000047;0.000035;0.000031;0.000030;0.000030;0.000030;0.000025
query3702	620.838	1239.66	2	1239.64	0.022176	D	YYFALAHTVR	D			62.83	1	0	gi|00489	50.14	0.999934	41.8217	131007_Sam_Standard_01_p.03825.03825.2	1239.693512[-0.031306];1239.632187[0.030019];1239.613525[0.048681];1239.653305[0.008901];1239.729904[-0.067698];1239.657150[0.005056];1239.645889[0.016317];1239.682327[-0.020121];1239.693527[-0.031321]	NRLQALLGVEQ/;LNVFASIGAVFC/;YYPLTEGEIR/;GDPGMSIQLLLP/;RLGQQIEKLGV/;VVQQQLNNGLQ/;ELEPQVAERLG/;VGNVGVGIADGIGL/;LGRIDVLVNNAG/	12.690000;11.770000;11.750000;11.630000;11.630000;11.630000;11.510000;10.230000;9.640000	0.053827;0.066527;0.066834;0.068707;0.068707;0.068707;0.070632;0.094842;0.000000	0.920000;0.020000;0.120000;0.000000;0.000000;0.120000;1.280000;0.590000;NA	0.000009682142;0.000007833781;0.000007797788;0.000007585277;0.000007585277;0.000007585277;0.000007378557;0.000005495047;0.000004797019	0.000042;0.000034;0.000034;0.000033;0.000033;0.000033;0.000032;0.000024;0.000021
query483	444.255	886.496	2	886.487	0.008427	L	VEEGAVKR	I			62.79	1	0	gi|00489	30.02	0.998177	27.392	131007_Sam_Standard_01_p.02099.02099.2	886.498428[-0.002788];886.407242[0.088398];886.428360[0.067280];886.498428[-0.002788];886.450821[0.044819];886.523621[-0.027981];886.523590[-0.027950];886.450821[0.044819];886.512375[-0.016735]	VEEKRAR/;VEEWDIP/;VEEPLTEA/;VEEKRRA/;VEENLRQ/;VTEGVVKR/;VEDLKKR/;VENEIQR/;VEAATLKGV/	32.770000;25.310000;24.350000;22.920000;22.900000;22.530000;21.250000;21.250000;21.180000	0.000528;0.002944;0.003673;0.005105;0.005129;0.005585;0.007499;0.007499;0.000000	7.460000;0.960000;1.430000;0.020000;0.370000;1.280000;0.000000;0.070000;NA	0.000993590742;0.000178323072;0.000142957695;0.000102850767;0.000102378211;0.000094017248;0.000070017651;0.000070017651;0.000068898146	0.004317;0.000775;0.000621;0.000447;0.000445;0.000408;0.000304;0.000304;0.000299
query2477	555.799	1109.58	2	1109.58	0.008168	A	PELLYYANK	Y			62.64	1	0	gi|02769	29.06	0.9981	27.2131	131007_Sam_Standard_02_p.04922.04922.2	1109.637222[-0.053386];1109.655655[-0.071819];1109.596817[-0.012981];1109.582916[0.000920];1109.568985[0.014851];1109.550552[0.033284];1109.680817[-0.096981];1109.633209[-0.049373];1109.546524[0.037312]	LIILYFSIE/;PELIKRNAIG/;PELLELTPQA/;PQNIRIGTDP/;GADSRQRLAH/;PEIPFATAGHA/;IIILSRGLPE/;LLILDEPLQG/;KQDDNGLLHA/	33.580000;25.810000;25.810000;21.420000;18.630000;17.940000;17.780000;17.780000;17.730000	0.000439;0.002624;0.002624;0.007211;0.013709;0.016069;0.016672;0.016672;0.000000	7.770000;0.000000;4.390000;2.790000;0.690000;0.160000;0.000000;0.050000;NA	0.001239293498;0.000207097173;0.000207097173;0.000075365775;0.000039643699;0.000033820044;0.000032596740;0.000032596740;0.000032223608	0.005386;0.000900;0.000900;0.000327;0.000172;0.000147;0.000142;0.000142;0.000140
query8904	563.975	1688.9	3	1688.88	0.025673	K	ARPEFTLPVHFYGR	V			62.62	1	0	gi|00489	53.39	0.999971	45.4005	131007_Sam_Standard_03_p.04115.04115.3	1688.874695[0.029686];1688.866821[0.037560];1688.811340[0.093041];1688.841019[0.063362];1688.827042[0.077339];1688.827042[0.077339];1688.842316[0.062065];1688.876724[0.027657];1688.876694[0.027687]	LPFLAHGGSHSRSAGPV/;IVHALGANVHASCAIDV/;IPMGCVLTLPATGSESN/;PSFSLWPAGQPTTTVT/;GNYRDRILTYYQQ/;AVQATGFEAYYRASR/;WPNGLYGSHLAVYGR/;VVKAAGGTLDVAATAAACT/;ADELLLKVENTTMGR/	9.230000;8.930000;8.650000;8.150000;7.610000;7.360000;6.090000;6.040000;5.280000	0.119399;0.127938;0.136458;0.153109;0.173380;0.183654;0.246037;0.248886;0.000000	0.300000;0.280000;0.500000;0.540000;0.250000;1.270000;0.050000;0.760000;NA	0.000004581287;0.000004275506;0.000004008552;0.000003572625;0.000003154914;0.000002978431;0.000002223246;0.000002197796;0.000001844962	0.000020;0.000019;0.000017;0.000016;0.000014;0.000013;0.000010;0.000010;0.000008
query6544	735.859	1469.7	2	1469.71	-0.001216	A	VFAGENFHHGDKL	X			62.41	1	0	gi|00924	37.33	0.999725	35.6089	131007_Sam_Standard_03_p.03661.03661.2	1469.671677[0.032277];1469.719086[-0.015132];1469.762650[-0.058696];1469.697281[0.006673];1469.701340[0.002614];1469.668304[0.035650];1469.660950[0.043004];1469.762695[-0.058741];1469.791855[-0.087901]	KTCVVACPYGAMEV/;VFANWFSDATSLL/;TYATKEHAHAKLT/;AFHAAAMLAGPDAID/;FVAWCPNTLVYGT/;VFCAKTAMDDAWL/;AVFCQQTGFGDGQI/;VFSGNVKNTVPAHT/;VFKVFGAADLYQI/	25.080000;16.700000;13.860000;13.690000;13.390000;11.670000;9.910000;9.160000;8.890000	0.003105;0.021380;0.041115;0.042756;0.045814;0.068077;0.102094;0.121339;0.000000	8.380000;2.840000;0.170000;0.300000;1.720000;1.760000;0.750000;0.270000;NA	0.000184876033;0.000026846063;0.000013959846;0.000013423959;0.000012527967;0.000008431030;0.000005621868;0.000004730212;0.000004445091	0.000803;0.000117;0.000061;0.000058;0.000054;0.000037;0.000024;0.000021;0.000019
query3054	589.303	1176.59	2	1176.58	0.013922	D	LDFKNPNSDK	S			61.54	1	0	gi|00924	40	0.999721	35.5455	131007_Sam_Standard_02_p.02619.02619.2	1176.625107[-0.033701];1176.636353[-0.044947];1176.497528[0.093878];1176.621262[-0.029856];1176.632507[-0.041101];1176.625122[-0.033716];1176.621292[-0.029886];1176.581528[0.009878];1176.552322[0.039084]	IDGAFVAKNSR/;GARFAGGGQKKT/;DLFQDFYET/;IDYIIGGPKMA/;DMTARVKFLP/;GNGFKRLGDTL/;MPFQDVLVTK/;VEFQDAIGWL/;LDAFRANENGA/	21.540000;20.210000;17.690000;11.950000;11.820000;11.820000;11.820000;11.820000;11.750000	0.007015;0.009528;0.017022;0.063826;0.065766;0.065766;0.065766;0.065766;0.000000	1.330000;2.520000;5.740000;0.130000;0.000000;0.000000;0.000000;0.070000;NA	0.000099972110;0.000073600177;0.000041198258;0.000010986993;0.000010662986;0.000010662986;0.000010662986;0.000010662986;0.000010492497	0.000434;0.000320;0.000179;0.000048;0.000046;0.000046;0.000046;0.000046;0.000046
query1819	526.283	1050.55	2	1050.55	0.004705	I	SIVGSYVGNR	A			61.15	1	0	gi|00330	47.84	0.999907	40.3382	131007_Sam_Standard_03_p.02364.02364.2	1050.509415[0.041097];1050.541946[0.008566];1050.538574[0.011938];1050.523315[0.027197];1050.480423[0.070089];1050.578354[-0.027842];1050.502182[0.048330];1050.473007[0.077505];1050.534576[0.015936]	LSKDFDRGN/;ISMIYAISGP/;AEGAFYLPLA/;ATALESFLAE/;CPVGYQKEQ/;SIVGTLAMFL/;AEQELYWL/;AERYENNGV/;VTVYEADVR/	13.310000;12.400000;11.240000;10.840000;10.790000;10.790000;10.670000;10.240000;10.040000	0.046666;0.057544;0.075162;0.082414;0.083368;0.083368;0.085704;0.094624;0.000000	0.910000;1.160000;0.400000;0.050000;0.000000;0.120000;0.430000;0.200000;NA	0.000016442196;0.000013333981;0.000010208450;0.000009310217;0.000009203644;0.000009203644;0.000008952819;0.000008108860;0.000007743902	0.000071;0.000058;0.000044;0.000040;0.000040;0.000040;0.000039;0.000035;0.000034
query6173	480.621	1438.84	3	1438.8	0.035345	R	RHPEYAVSVLLR	L			61.06	1	0	gi|02769	42.62	0.999885	39.3878	131007_Sam_Standard_01_p.03227.03227.3	1438.861984[-0.022180];1438.814346[0.025458];1438.850723[-0.010919];1438.836823[0.002981];1438.796631[0.043173];1438.895203[-0.055399];1438.861969[-0.022165];1438.815674[0.024130];1438.797287[0.042517]	RTVTKPAVAEVLR/;IEALAQGAADLVLR/;ILERLEDVALLR/;LQRLTAAVNRAVQ/;PTGLQGSLVVCPIR/;FLLLPGIVWIGIV/;IRAGIAGITEGLIR/;HRFEIERIARI/;DFHQLIVWVLVA/	18.440000;15.530000;9.370000;9.190000;7.830000;7.050000;6.510000;6.490000;6.450000	0.014322;0.027990;0.115611;0.120504;0.164816;0.197242;0.223357;0.224388;0.000000	2.910000;6.160000;0.180000;1.360000;0.780000;0.540000;0.020000;0.040000;NA	0.000054695298;0.000027986590;0.000006775635;0.000006500548;0.000004752805;0.000003971458;0.000003507115;0.000003491001;0.000003458995	0.000238;0.000122;0.000029;0.000028;0.000021;0.000017;0.000015;0.000015;0.000015
query3614	618.791	1235.57	2	1235.58	-0.010249	I	DGGEGKEELFR	S			60.06	1	0	gi|00330	46.88	0.999905	40.2356	131007_Sam_Standard_01_p.02588.02588.2	1235.593475[-0.025507];1235.601563[-0.033594];1235.589447[-0.021479];1235.556427[0.011541];1235.603378[-0.035410];1235.603378[-0.035410];1235.557114[0.010854];1235.662216[-0.094248];1235.579544[-0.011576]	NWGVSEIEFR/;VRCGDRMPFR/;KTADPPATNANH/;DRSGIREEACT/;DKTAESGLPYVG/;QTLFADDSNLI/;QDDWTAPTFR/;GAGGYSSLGKIAR/;EEREHPHFR/	13.180000;11.720000;10.840000;10.120000;9.260000;8.900000;8.770000;8.760000;8.280000	0.048084;0.067298;0.082414;0.097275;0.118577;0.128825;0.132739;0.133045;0.000000	1.460000;0.880000;0.720000;0.860000;0.360000;0.130000;0.010000;0.480000;NA	0.000020509679;0.000014654090;0.000011966272;0.000010138153;0.000008316850;0.000007655241;0.000007429488;0.000007412400;0.000006636802	0.000089;0.000064;0.000052;0.000044;0.000036;0.000033;0.000032;0.000032;0.000029
query2938	582.322	1162.63	2	1162.62	0.006369	K	LVNELTEFAK	T			60.04	1	0	gi|02769	41.22	0.999643	34.4689	131007_Sam_Standard_02_p.03727.03727.2	1162.550613[0.079123];1162.598221[0.031515];1162.659760[-0.030024];1162.616852[0.012884];1162.642014[-0.012278];1162.609467[0.020269];1162.638611[-0.008875];1162.550629[0.079107];1162.634583[-0.004847]	ALVSTPSYDPN/;LVNEKDKGNF/;LAAISITFAAVS/;LVNKGWTMKS/;IVGADVLMFAK/;AIVENRPGGGPP/;YYLEIRLPP/;PDNIFTVTQE/;LAAAESARYIV/	18.820000;17.740000;17.710000;17.520000;15.400000;14.080000;13.310000;11.670000;11.230000	0.013122;0.016827;0.016943;0.017701;0.028840;0.039084;0.046666;0.068077;0.000000	1.080000;0.030000;0.190000;2.120000;1.320000;0.770000;1.640000;0.440000;NA	0.000075482238;0.000058863322;0.000058458110;0.000055955756;0.000034343517;0.000025342227;0.000021224857;0.000014549389;0.000013147548	0.000328;0.000256;0.000254;0.000243;0.000149;0.000110;0.000092;0.000063;0.000057
query3277	601.337	1200.66	2	1200.65	0.006596	N	GTTVLVGMPAGAK	C			59.97	1	0	gi|00330	36.12	0.999296	31.5243	131007_Sam_Standard_03_p.02944.02944.2	1200.660156[0.000096];1200.723038[-0.062786];1200.694031[-0.033779];1200.715195[-0.054943];1200.707764[-0.047512];1200.646255[0.013997];1200.602631[0.057621];1200.653625[0.006627];1200.625122[0.035130]	LDASDEVIVKL/;GQAINFVLVKI/;LEWMAVIVKL/;VMLSTVVLVALG/;ASISLTQLKLQ/;TRTIVNGNEVV/;PLAYEGVLENP/;VKSMKGVLENP/;HAHATLVLDPQ/	23.850000;20.160000;20.160000;19.510000;16.040000;15.460000;14.540000;14.540000;14.460000	0.004121;0.009638;0.009638;0.011194;0.024889;0.028445;0.035156;0.035156;0.000000	3.690000;0.000000;0.650000;3.470000;0.580000;0.920000;0.000000;0.080000;NA	0.000244171038;0.000104398474;0.000104398474;0.000089886433;0.000040429107;0.000035374813;0.000028621616;0.000028621616;0.000028099213	0.001061;0.000453;0.000453;0.000390;0.000176;0.000154;0.000124;0.000124;0.000122
query3446	610.809	1219.6	2	1219.6	-0.00117	V	SVSEAAIEASTR	Y			59.54	1	0	gi|00330	31.93	0.998717	28.9189	131007_Sam_Standard_03_p.02044.02044.2	1219.630890[-0.027644];1219.644836[-0.041590];1219.520447[0.082799];1219.587326[0.015920];1219.579285[0.023961];1219.667328[-0.064082];1219.640823[-0.037577];1219.572937[0.030309];1219.542892[0.060354]	RYNELAARLD/;ASFQEALTALGI/;TGETNTDDLSPA/;WSISAWDLDK/;ADSRDLTTREG/;VSRGYLVDGRV/;VSSLSTEGATRI/;GLCLSAISCAWP/;TGEETQTANRN/	27.610000;21.830000;18.580000;18.520000;17.650000;17.650000;17.510000;17.480000;17.330000	0.001734;0.006561;0.013868;0.014060;0.017179;0.017179;0.017742;0.017865;0.000000	5.780000;3.250000;0.060000;0.870000;0.000000;0.140000;0.030000;0.150000;NA	0.000640387117;0.000169216453;0.000080064978;0.000078966445;0.000064631255;0.000064631255;0.000062581013;0.000062150208;0.000060040263	0.002782;0.000735;0.000348;0.000343;0.000281;0.000281;0.000272;0.000270;0.000261
query14991	782.416	2344.23	3	2344.29	-0.063331	D	RIPELRQIIEQLSSGFFSPK	Q			59.18	1	0	gi|00489	48.85	0.999964	44.427	131007_Sam_Standard_03_p.06489.06489.3	2344.141586[0.085366];2344.216171[0.010781];2344.213486[0.013466];2344.213470[0.013482];2344.212128[0.014824];2344.202255[0.024697];2344.205658[0.021294];2344.199097[0.027855];2344.148773[0.078179]	RPNVTNMRQALLMGEHYSVE/;IEEQPDLSGKYTQPILKEAVS/;GRQLAVRSDNAEPDLTYQAIK/;KGEQRAVNLTYDNPQELKNK/;LAIELASTAVQEADKAESRETI/;ETPVDEQGLQFARGSKEAALKA/;TIEPTGLGTVKDGGLNASLMGRAS/;ARLDQMMESVSQLLQLARAGQ/;LEQPNHHLIPADSEFYPPQL/	10.330000;6.090000;5.400000;4.960000;2.940000;2.440000;2.200000;1.960000;1.670000	0.092683;0.246037;0.288403;0.319154;0.508159;0.570164;0.602560;0.636796;0.000000	4.240000;0.690000;0.440000;2.020000;0.500000;0.240000;0.240000;0.290000;NA	0.000013031198;0.000004908902;0.000004187785;0.000003784289;0.000002376755;0.000002118285;0.000002004400;0.000001896637;0.000001774125	0.000057;0.000021;0.000018;0.000016;0.000010;0.000009;0.000009;0.000008;0.000008
query3542	615.783	1229.55	2	1229.54	0.016072	L	YPNDNFFEGK	E			58.59	1	0	gi|00489	49.17	0.999914	40.6794	131007_Sam_Standard_02_p.04069.04069.2	1229.643799[-0.092433];1229.520035[0.031331];1229.596848[-0.045482];1229.560471[-0.009105];1229.506302[0.045064];1229.607407[-0.056041];1229.600006[-0.048640];1229.494873[0.056493];1229.604050[-0.052684]	KSVMPVAKGEGQ/;NIDFSDDYNK/;YPYDTTPFVK/;YPYDTTPFVQ/;YPEPDFMFNA/;AGTPAKMAAVADAG/;DAQELRQGEGK/;YQRDDEYNQ/;FLVDEHKQSQ/	9.420000;9.030000;8.940000;8.940000;8.350000;8.260000;8.000000;6.810000;6.770000	0.114288;0.125026;0.127644;0.127644;0.146218;0.149279;0.158489;0.208449;0.000000	0.390000;0.090000;0.000000;0.590000;0.090000;0.260000;1.190000;0.040000;NA	0.000012104946;0.000011065291;0.000010838342;0.000010838342;0.000009461562;0.000009267506;0.000008728967;0.000006636863;0.000006576016	0.000053;0.000048;0.000047;0.000047;0.000041;0.000040;0.000038;0.000029;0.000029
query15662	822.746	2465.22	3	2465.23	-0.017463	K	APNDFNLKDFNVGGYIQAVLDR	N			58.39	1	0	gi|00489	49.35	0.99994	42.2089	131007_Sam_Standard_01_p.06573.06573.3	2465.150757[0.065697];2465.281509[-0.065055];2465.193481[0.022973];2465.306671[-0.090217];2465.252518[-0.036064];2465.302628[-0.086174];2465.302643[-0.086189];2465.215958[0.000496];2465.184494[0.031960]	MQYANISPPELMGFSVNEPWR/;PSFEIASKLHEAQTLLGHFANR/;PFADESHRDENIQLLQNAAGAAV/;NVAPAAWVKKIKKPEQVDDGSW/;FAAQLLGLGYSKRLNGPSWEQM/;FPSKTPKNGSRNPKEPKELNPT/;VGQLFESDHKRIELLLQANQQ/;VHRVRDIEADTPARYNADPDR/;CSPLTKAHRPHVFQGDWCRDL/	9.040000;8.500000;7.860000;6.420000;5.840000;5.730000;4.670000;4.360000;4.280000	0.124738;0.141254;0.163682;0.228034;0.260615;0.267301;0.341193;0.366438;0.000000	0.540000;0.640000;1.440000;0.580000;0.110000;1.060000;0.310000;0.080000;NA	0.000011613788;0.000010255903;0.000008850624;0.000006352927;0.000005558708;0.000005419683;0.000004245940;0.000003953428;0.000003881270	0.000050;0.000045;0.000038;0.000028;0.000024;0.000024;0.000018;0.000017;0.000017
query1636	518.277	1034.54	2	1034.54	9.7e-05	C	SDVFNQVVK	S			58.37	1	0	gi|00330	34.48	0.998851	29.3961	131007_Sam_Standard_01_p.02884.02884.2	1034.524399[0.015371];1034.564819[-0.025049];1034.539658[0.000112];1034.529083[0.010687];1034.463715[0.076055];1034.488022[0.051748];1034.598495[-0.058725];1034.554916[-0.015146];1034.583435[-0.043665]	SLTSASQDVK/;STLDVAFLLG/;SAGNAVSFVAL/;SSASRGMRAI/;MAVDAMRNGA/;SDKDSGSIVQ/;AAAKVHRVPS/;FPGFRDLLA/;QLMTIFVAL/	23.890000;23.800000;17.390000;16.680000;16.670000;16.520000;16.430000;15.380000;15.380000	0.004083;0.004169;0.018239;0.021478;0.021528;0.022284;0.022751;0.028973;0.000000	0.090000;6.410000;0.710000;0.010000;0.150000;0.090000;1.050000;0.000000;NA	0.000356041501;0.000348739085;0.000079707763;0.000067686276;0.000067530602;0.000065237998;0.000063899965;0.000050176530;0.000050176530	0.001547;0.001515;0.000346;0.000294;0.000293;0.000283;0.000278;0.000218;0.000218
query5736	700.848	1399.68	2	1399.68	0.004063	I	FYESHGKLEYK	D			57.98	1	0	gi|00330	44.6	0.999887	39.4608	131007_Sam_Standard_03_p.02878.02878.2	1399.680573[0.000675];1399.745956[-0.064708];1399.734711[-0.053463];1399.745941[-0.064693];1399.757172[-0.075924];1399.661942[0.019306];1399.590530[0.090718];1399.669327[0.011921];1399.619034[0.062214]	TSCFLIQNALYGA/;KYSLATGQLPSVH/;ERISISYLVGYT/;QYSQKKKSLGFS/;QTAVQHAINKKY/;EYQETFDKVNK/;SRGGHDNYGFYQ/;EVDLNFLEMYK/;RLMFNGDEQYGA/	13.380000;12.030000;8.470000;8.410000;6.350000;6.260000;5.770000;5.580000;5.420000	0.045920;0.062661;0.142233;0.144212;0.231739;0.236592;0.264850;0.276694;0.000000	1.350000;3.560000;0.060000;2.060000;0.090000;0.490000;0.190000;0.160000;NA	0.000034669759;0.000025406850;0.000011193111;0.000011039536;0.000006869907;0.000006729005;0.000006011057;0.000005753748;0.000005545629	0.000151;0.000110;0.000049;0.000048;0.000030;0.000029;0.000026;0.000025;0.000024
query10915	630.682	1889.02	3	1889	0.022393	K	LITAIGDVVNHDPVVGDR	L			57.41	1	0	gi|00489	56	0.999995	53.3348	131007_Sam_Standard_03_p.03939.03939.3	1888.927902[0.095193];1889.037048[-0.013953]	LLGNLNGTLGPYDGTRND/;LTIINRADVLPLDSNHV/	1.410000;0.690000	0.722770;0.674528	0.720000;NA	0.000002511875;0.000002128129	0.000011;0.000009
query4165	633.84	1265.67	2	1265.66	0.004659	K	LITAIGDVVNHD	P			57.21	1	0	gi|00489	42.23	0.999802	37.0353	131007_Sam_Standard_01_p.03685.03685.2	1265.709167[-0.042933];1265.607437[0.058797];1265.643799[0.022435];1265.650330[0.015904];1265.632553[0.033681];1265.713211[-0.046977];1265.697952[-0.031718];1265.734329[-0.068095];1265.734314[-0.068080]	LLKVDEHSGLR/;VVGEVVECAQHP/;LLTPQMAQLHD/;VIDAIGEGPIEGP/;ILEQVGDYMKA/;VIWITAIGLGHS/;LLSLVGLGDKHD/;PTVKNQSLPLAV/;ILIEDGIQPLR/	14.980000;13.000000;9.350000;9.340000;8.990000;8.850000;8.230000;8.210000;8.210000	0.031769;0.050119;0.116145;0.116413;0.126183;0.130317;0.150314;0.151008;0.000000	1.980000;3.650000;0.010000;0.350000;0.140000;0.620000;0.020000;0.000000;NA	0.000059829316;0.000037923991;0.000016364926;0.000016327287;0.000015063089;0.000014585255;0.000012644860;0.000012586763;0.000012586763	0.000260;0.000165;0.000071;0.000071;0.000065;0.000063;0.000055;0.000055;0.000055
query8589	832.427	1662.84	2	1662.83	0.007725	I	TAIGDVVNHDPVVGDR	L			57.06	1	0	gi|00489	49.16	0.999929	41.507	131007_Sam_Standard_03_p.03945.03945.2	1662.857681[-0.017375];1662.850494[-0.010188];1662.808243[0.032063];1662.800186[0.040120];1662.832565[0.007741];1662.792313[0.047993];1662.912704[-0.072398];1662.771179[0.069127];1662.857681[-0.017375]	DGITAGEKDFSALIAR/;EYFVIDGPTPKAVLD/;RVCVSPMYADRNPR/;IESQLWGEVQFGDR/;GDIDGVQGQIVHALGAN/;CFLSIDEVDVPAEAR/;TLDGAVKLMLRYQVG/;TALWALYDSQGNPMP/;GIDRDLKELYNVQT/	7.900000;7.730000;6.790000;5.940000;5.500000;5.160000;4.870000;4.200000;4.140000	0.162181;0.168655;0.209411;0.254683;0.281838;0.304789;0.325837;0.380189;0.000000	0.170000;0.940000;0.850000;0.440000;0.340000;0.290000;0.670000;0.060000;NA	0.000012133031;0.000011667271;0.000009396569;0.000007726260;0.000006981831;0.000006456086;0.000006039059;0.000005175702;0.000005104689	0.000053;0.000051;0.000041;0.000034;0.000030;0.000028;0.000026;0.000022;0.000022
query2955	582.799	1163.58	2	1163.56	0.021977	M	PYDTPVPGYR	N			56.92	1	0	gi|00489	32.17	0.99747	25.9681	131007_Sam_Standard_02_p.02438.02438.2	1163.568329[0.014775];1163.607422[-0.024318];1163.582245[0.000859];1163.618622[-0.035518];1163.618637[-0.035533];1163.561096[0.022008];1163.607407[-0.024303];1163.597534[-0.014430];1163.570999[0.012105]	GGNFTNALSQR/;LDFTGGTVIEI/;VLYTPSDKNAG/;IFDTLATAAKN/;PHIQIVTLDE/;PYSLINAWNS/;IFSQLVDEIT/;YGGAAGPVIFGVG/;YPDLDKEATI/	24.750000;22.770000;22.770000;21.060000;20.790000;20.000000;19.750000;18.520000;17.640000	0.003350;0.005284;0.005284;0.007834;0.008337;0.010000;0.010593;0.014060;0.000000	1.980000;0.000000;1.710000;0.270000;0.790000;0.250000;1.230000;0.880000;NA	0.000605201057;0.000383618619;0.000383618619;0.000258761511;0.000243164223;0.000202721438;0.000191381378;0.000144178226;0.000117733398	0.002629;0.001666;0.001666;0.001124;0.001056;0.000880;0.000831;0.000626;0.000511
query3847	625.344	1248.67	2	1248.66	0.013173	V	GLSTLPEIYEK	M			56.74	1	0	gi|00330	40.39	0.999671	34.8255	131007_Sam_Standard_03_p.03616.03616.2	1248.693848[-0.020534];1248.645767[0.027547];1248.642410[0.030904];1248.678772[-0.005458];1248.707764[-0.034450];1248.635056[0.038258];1248.697876[-0.024562];1248.609848[0.063466];1248.682632[-0.009318]	GLSRHNLIAPAT/;MQVILLLSMSD/;IGSDVLLCPLYG/;GLMYELAVQIL/;INGKDYSVKII/;VATTVPAGTQGTF/;QRFFKAVEPK/;QEPVAESPKGHA/;LLNLGHGLVGEQ/	16.350000;14.240000;13.270000;12.950000;10.570000;9.690000;9.330000;9.130000;8.650000	0.023174;0.037670;0.047098;0.050699;0.087700;0.107399;0.116681;0.122180;0.000000	2.110000;0.970000;0.320000;2.380000;0.880000;0.360000;0.200000;0.480000;NA	0.000091381232;0.000056215621;0.000044963179;0.000041769282;0.000024146657;0.000019717734;0.000018149180;0.000017332332;0.000015518760	0.000397;0.000244;0.000195;0.000181;0.000105;0.000086;0.000079;0.000075;0.000067
query57	407.765	813.515	2	813.496	0.019262	K	AADALLLK	V			56.64	1	0	gi|00924	21.41	0.977714	16.5198	131007_Sam_Standard_02_p.02901.02901.2	813.459595[0.055639];813.495972[0.019262];813.495987[0.019247];813.495987[0.019247];813.459595[0.055639];813.470810[0.044424];813.482040[0.033194];813.434448[0.080786];813.474854[0.040380]	AAEVALVAA/;AADALKLL/;AASVLLAVA/;AAVSLLGLA/;EAGLAIVAA/;NNALALKA/;AARNIKAA/;AAGNGALLQ/;AWLALLQ/	35.230000;35.070000;30.690000;30.690000;26.690000;26.240000;24.540000;23.740000;23.310000	0.000300;0.000311;0.000853;0.000853;0.002143;0.002377;0.003516;0.004227;0.000000	0.160000;4.380000;0.000000;4.000000;0.450000;1.700000;0.800000;0.430000;NA	0.007066625124;0.006811018394;0.002484345842;0.002484345842;0.000989035894;0.000891686216;0.000602853870;0.000501432008;0.000454163317	0.030799;0.029681;0.010803;0.010803;0.004297;0.003874;0.002619;0.002178;0.001973
query4351	639.785	1277.56	2	1277.53	0.024388	R	GYNAQEYYDR	I			56.49	1	0	gi|00489	41.27	0.999741	35.8734	131007_Sam_Standard_03_p.01886.01886.2	1277.604050[-0.048412];1277.613907[-0.058269];1277.567001[-0.011363];1277.596161[-0.040523];1277.574417[-0.018779];1277.636398[-0.080760];1277.596863[-0.041225];1277.582901[-0.027263];1277.575729[-0.020091]	NYQQELFHVT/;YGNAEIEAGIEI/;NRNLMDVTNSD/;EILYPPSSGNAM/;LCSEVIGGGGAGGAM/;FVSAEEVDRAR/;GRMDRSIGGQMA/;HPLWEYYRD/;CMNGKHSFAQR/	15.220000;11.230000;11.200000;10.420000;10.050000;9.760000;9.590000;9.480000;8.450000	0.030061;0.075336;0.075858;0.090782;0.098855;0.105682;0.109901;0.112720;0.000000	3.990000;0.030000;0.780000;0.370000;0.290000;0.170000;0.110000;1.030000;NA	0.000074625571;0.000029777461;0.000029572475;0.000024710849;0.000022692778;0.000021226953;0.000020412099;0.000019901585;0.000015699567	0.000324;0.000129;0.000128;0.000107;0.000099;0.000092;0.000089;0.000086;0.000068
query14860	776.685	2327.03	3	2327.05	-0.010811	R	IEEELGDNAVFAGENFHHGDK	L			56.38	1	0	gi|00924	NA	NA	NA	131007_Sam_Standard_01_p.03275.03275.3
query224	420.231	838.448	2	838.434	0.013815	E	ALDFFAR	G			56.3	1	0	gi|00330	30.45	0.996045	24.0291	131007_Sam_Standard_02_p.04254.04254.2	838.502457[-0.054911];838.440918[0.006628];838.443604[0.003942];838.375534[0.072012];838.480011[-0.032465];838.389465[0.058081];838.454849[-0.007303];838.429703[0.017843];838.466080[-0.018534]	AILPQAAR/;ALSNHAAR/;ALPEEALP/;ANNMYAR/;AIDPITLP/;AIDCAAIY/;AINQLPPS/;ALDHRID/;ALDKKHQ/	25.850000;25.850000;24.470000;22.980000;21.860000;18.640000;18.640000;18.640000;18.640000	0.002600;0.002600;0.003573;0.005035;0.006516;0.013677;0.013677;0.013677;0.000000	0.000000;1.380000;1.490000;1.120000;3.220000;0.000000;0.000000;0.000000;NA	0.000898005869;0.000898005869;0.000653550536;0.000463744931;0.000358326704;0.000170717945;0.000170717945;0.000170717945;0.000170717945	0.003902;0.003902;0.002839;0.002014;0.001556;0.000741;0.000741;0.000741;0.000741
query1055	482.784	963.554	2	963.539	0.014836	W	KIGDYAGIK	W			56.12	1	0	gi|00330	25.69	0.992713	21.3742	131007_Sam_Standard_02_p.01847.01847.2	963.484787[0.068959];963.586517[-0.032771];963.575317[-0.021571];963.538910[0.014836];963.538925[0.014821];963.554153[-0.000407];963.469513[0.084233];963.586517[-0.032771];963.550156[0.003590]	QIGAMFLGQ/;KLYRSLGK/;GALIVPPLQG/;QLYTAKQL/;KSTAILFGQ/;KINWYLK/;KITSAGEMQ/;KIRSYGKI/;KIDGFRKT/	30.430000;26.060000;25.280000;24.220000;24.000000;23.990000;21.360000;21.190000;20.970000	0.000906;0.002477;0.002965;0.003784;0.003981;0.003990;0.007311;0.007603;0.000000	4.370000;0.780000;1.060000;0.220000;0.010000;2.630000;0.170000;0.220000;NA	0.002678079711;0.000979091994;0.000818132225;0.000640949037;0.000609289227;0.000607887901;0.000331759600;0.000319024105;0.000303265844	0.011646;0.004254;0.003555;0.002784;0.002647;0.002641;0.001441;0.001386;0.001317
query1023	480.778	959.541	2	959.529	0.012014	V	ENVTELKK	N			56.09	1	0	gi|00489	26.71	0.994551	22.6366	131007_Sam_Standard_03_p.02667.02667.2	959.471222[0.069524];959.539993[0.000753];959.503586[0.037160];959.455978[0.084768];959.528748[0.011998];959.492371[0.048375];959.539993[0.000753];959.492386[0.048360];959.492371[0.048375]	KPAGYEAPQ/;KDVTDRVK/;ENSIRLTQ/;EGVSAEIQQ/;EQTLKITQ/;KDTAGEVIQ/;QDVTRKLT/;KDGVVTLND/;KDDVDAVAK/	29.380000;24.700000;24.080000;23.870000;22.000000;20.870000;19.880000;19.730000;19.700000	0.001153;0.003388;0.003908;0.004102;0.006310;0.008185;0.010280;0.010641;0.000000	4.680000;0.620000;0.210000;1.870000;1.130000;0.990000;0.150000;0.030000;NA	0.002121421326;0.000722149193;0.000626075819;0.000596522639;0.000387817078;0.000298969531;0.000238027388;0.000229946567;0.000228363626	0.009223;0.003137;0.002720;0.002591;0.001685;0.001299;0.001034;0.000999;0.000992
query1902	530.312	1058.61	2	1058.6	0.012685	G	VENVTELKK	N			55.8	1	0	gi|00489	33.57	0.998379	27.9019	131007_Sam_Standard_01_p.02720.02720.2	1058.535629[0.074209];1058.524414[0.085424];1058.546860[0.062978];1058.633545[-0.023707];1058.524414[0.085424];1058.554260[0.055578];1058.535645[0.074193];1058.539642[0.070196];1058.560760[0.049078]	EVDKQEGRV/;VTTNATPEQV/;VERGLSQDR/;QTITIDLKK/;VEQSITTGPQ/;VTSCLVNPRA/;VENGRTTVPS/;VENHTLAYL/;VENLIENKT/	22.230000;22.210000;17.120000;16.560000;16.080000;15.920000;15.540000;15.540000;15.540000	0.005984;0.006012;0.019409;0.022080;0.024660;0.025586;0.027925;0.027925;0.000000	0.020000;5.090000;0.560000;0.480000;0.160000;0.380000;0.000000;0.000000;NA	0.000438829073;0.000436812837;0.000135299251;0.000118931088;0.000106486706;0.000102634978;0.000094036270;0.000094036270;0.000094036270	0.001906;0.001897;0.000588;0.000517;0.000462;0.000446;0.000408;0.000408;0.000408
query1793	525.265	1048.52	2	1048.51	0.008032	L	TPDETYVPK	A			55.78	1	0	gi|02769	35.68	0.998789	29.1683	131007_Sam_Standard_02_p.03461.03461.2	1048.555298[-0.039576];1048.518936[-0.003214];1048.540054[-0.024332];1048.518921[-0.003199];1048.507675[0.008047];1048.566528[-0.050806];1048.537537[-0.021815];1048.482544[0.033178];1048.493774[0.021948]	TPEHEVLPK/;TPPLGPQDQP/;TKITDTKDQ/;TPDKAFQDK/;TPDEVYAAIA/;TPQPRPEKP/;QAQFIMSKP/;AGDSAWTLTQ/;TPDNRSVNF/	20.100000;19.540000;18.150000;17.150000;17.020000;14.940000;13.720000;13.510000;13.400000	0.009772;0.011117;0.015311;0.019275;0.019861;0.032063;0.042462;0.044566;0.000000	0.560000;1.390000;1.000000;0.130000;2.080000;1.220000;0.210000;0.110000;NA	0.000270068367;0.000237396176;0.000172374777;0.000136922153;0.000132884314;0.000082314002;0.000062154663;0.000059220725;0.000057739593	0.001173;0.001031;0.000749;0.000595;0.000577;0.000357;0.000270;0.000257;0.000251
query1068	484.755	967.496	2	967.476	0.019628	R	EALDFFAR	G			55.61	1	0	gi|00330	16.48	0.976012	16.2001	131007_Sam_Standard_01_p.04263.04263.2	967.501495[-0.005549];967.537872[-0.041926];967.479706[0.016240];967.533844[-0.037898];967.501480[-0.005534];967.595352[-0.099406];967.556274[-0.060328];967.558990[-0.063044];967.522583[-0.026637]	SLLDFFAVG/;LSLDFVFK/;VTLDFRMS/;LSIDIIGHT/;EALFYQVV/;LSLPLALEL/;AKNPQALAR/;ELAPVDLVI/;ISLEPPLEA/	39.130000;24.850000;24.850000;15.880000;13.930000;13.550000;13.530000;13.160000;12.830000	0.000122;0.003273;0.003273;0.025823;0.040458;0.044157;0.044361;0.048306;0.000000	14.280000;0.000000;8.970000;1.950000;0.380000;0.020000;0.370000;0.330000;NA	0.021951042487;0.000819323007;0.000819323007;0.000103861634;0.000066291089;0.000060737254;0.000060458191;0.000055520728;0.000051458266	0.096394;0.003560;0.003560;0.000451;0.000288;0.000264;0.000263;0.000241;0.000223
query5852	706.887	1411.76	2	1411.77	-0.007121	V	PQVSTPTLVEVSR	S			55.58	1	0	gi|02769	27.1	0.997208	25.5404	131007_Sam_Standard_02_p.03148.03148.2	1411.755844[0.004140];1411.803467[-0.043483];1411.741913[0.018071];1411.796921[-0.036937];1411.719482[0.040502];1411.730713[0.029271];1411.793564[-0.033580];1411.760529[-0.000545];1411.851089[-0.091105]	PKVSLDDPEALTK/;KPVSQALNIATGLT/;PKVGNEVRNAIES/;APRSTCQLLPKAK/;PQVVSELDTPAAVS/;PQTVSGPLANSTLQ/;KPVKLASHREFT/;PRAAMEIIVAGRE/;RRVTELLSLVGLG/	28.480000;22.610000;15.590000;13.630000;12.550000;11.370000;11.270000;10.140000;10.080000	0.001419;0.005483;0.027606;0.043351;0.055590;0.072946;0.074645;0.096828;0.000000	5.870000;7.020000;1.960000;1.080000;1.180000;0.100000;1.130000;0.060000;NA	0.001944400093;0.000503252143;0.000099950652;0.000063648128;0.000049634727;0.000037825583;0.000036964568;0.000028496114;0.000028105132	0.008453;0.002186;0.000434;0.000276;0.000216;0.000164;0.000161;0.000124;0.000122
query574	450.766	899.518	2	899.508	0.009923	T	PTLVEVSR	S			55.52	1	0	gi|02769	34.27	0.998797	29.1972	131007_Sam_Standard_02_p.03135.03135.2	899.423615[0.093937];899.460022[0.057530];899.459991[0.057561];899.450119[0.067433];899.450119[0.067433];899.532776[-0.015224];899.460007[0.057545];899.532761[-0.015209];899.515030[0.002522]	PTIPTENE/;PLTLDVADG/;PTIEELQA/;PTINFAHT/;PTISAQHF/;PTISLSAVI/;PTLEINVD/;PTLESKII/;PTLIMGGVI/	21.250000;16.830000;15.490000;15.490000;15.490000;15.490000;15.490000;15.490000;15.490000	0.007499;0.020749;0.028249;0.028249;0.028249;0.028249;0.028249;0.028249;0.000000	4.420000;1.340000;0.000000;0.000000;0.000000;0.000000;0.000000;0.000000;NA	0.000373660515;0.000135044595;0.000099192128;0.000099192128;0.000099192128;0.000099192128;0.000099192128;0.000099192128;0.000099192128	0.001623;0.000587;0.000431;0.000431;0.000431;0.000431;0.000431;0.000431;0.000431
query15523	814.382	2440.12	3	2440.13	-0.00454	R	IEEELGDNAVFAGENFHHGDKL	X			55.13	1	0	gi|00924	52.68	0.999995	52.68	131007_Sam_Standard_01_p.03711.03711.3	2440.063477[0.061484]	AVSNGKDMRQADDCTTEWEALT/	2.45	0.058749	NA	5.39508e-06	2.3e-05
query3258	600.299	1198.58	2	1198.57	0.013494	V	MENFVAFVDK	C			55.08	1	0	gi|02769	40.22	0.999474	32.789	131007_Sam_Standard_02_p.05346.05346.2	1198.569244[0.013494];1198.569244[0.013494];1198.565216[0.017522];1198.605637[-0.022899];1198.572617[0.010121];1198.565201[0.017537];1198.613510[-0.030772];1198.569260[0.013478];1198.577148[0.005590]	MLGYNVFIDQ/;YLAACGVFIGDA/;LSHVAIGEMGEG/;TMVFKAFDAGL/;CSLAFALTGCIT/;HKLEADMLDAG/;TFSVWFGISR/;GYTSLVWATVC/;GVIFFGFGNGGQ/	14.860000;14.560000;13.710000;12.210000;11.750000;11.740000;11.320000;11.300000;11.240000	0.032659;0.034995;0.042560;0.060117;0.066834;0.066988;0.073790;0.074131;0.000000	0.300000;0.850000;1.500000;0.460000;0.010000;0.420000;0.020000;0.060000;NA	0.000095010464;0.000088668924;0.000072907371;0.000051614466;0.000046427088;0.000046320308;0.000042050527;0.000041857322;0.000041283018	0.000413;0.000385;0.000317;0.000224;0.000202;0.000201;0.000183;0.000182;0.000179
query321	428.721	855.427	2	855.413	0.013936	L	SSGFFSPK	Q			54.51	1	0	gi|00489	25.25	0.995837	23.8061	131007_Sam_Standard_01_p.05116.05116.2	855.419876[0.006734];855.419876[0.006734];855.416016[0.010594];855.419876[0.006734];855.390884[0.035726];855.408646[0.017964];855.433792[-0.007182];855.379639[0.046971];855.397415[0.029195]	SSQGPRPQ/;QDNAPRGV/;SSGIYAMK/;ENGQPRVG/;SSMLHGQP/;SSHALDVQ/;SSIPDPLQ/;SSYIMQQ/;SSYLTGTQ/	29.260000;20.850000;16.270000;15.180000;14.530000;14.480000;14.480000;14.480000;14.480000	0.001186;0.008222;0.023605;0.030339;0.035237;0.035645;0.035645;0.035645;0.000000	8.410000;4.580000;1.090000;0.650000;0.050000;0.000000;0.000000;0.000000;NA	0.002972954875;0.000428734386;0.000149344185;0.000116195235;0.000100043371;0.000098898184;0.000098898184;0.000098898184;0.000098898184	0.012931;0.001862;0.000649;0.000505;0.000435;0.000430;0.000430;0.000430;0.000430
query10876	629.639	1885.89	3	1885.9	-0.001091	R	GYNAQEYYDRIPELR	Q			53.85	1	0	gi|00489	36	0.99963	34.3164	131007_Sam_Standard_02_p.03741.03741.3	1885.985718[-0.090981];1885.964600[-0.069863];1885.961441[-0.066704];1885.883972[0.010765];1885.925049[-0.030312];1885.964569[-0.069832];1885.983246[-0.088509];1885.976028[-0.081291];1885.971786[-0.077049]	AKANELRSGDVLAGVAAASS/;NYQQADGRIEVPEVLR/;DACGRASLCRAVAVEPIR/;DGKPVAELENNGVTNGAAM/;RRESLLCHDDKMDLR/;LEVNELRNNYQEPLR/;VSSGMLHAPQFIRQKST/;VSEFYKVISWQMTLR/;NRNIAARTAAQNALNSTT/	17.850000;9.740000;9.290000;4.220000;3.490000;2.310000;1.920000;1.850000;1.210000	0.016406;0.106170;0.117761;0.378443;0.447713;0.587489;0.642688;0.653131;0.000000	8.110000;0.450000;5.070000;0.730000;1.180000;0.390000;0.070000;0.640000;NA	0.000251095669;0.000038800670;0.000034981564;0.000010885270;0.000009201089;0.000007011957;0.000006409722;0.000006307238;0.000005443011	0.001091;0.000169;0.000152;0.000047;0.000040;0.000030;0.000028;0.000027;0.000024
query251	422.26	842.506	2	842.486	0.01943	R	VLVDLER	L			53.71	1	0	gi|00489	8.65	0.76938	6.37102	131007_Sam_Standard_03_p.02749.02749.2	842.522537[-0.016947];842.522537[-0.016947];842.497391[0.008199];842.522537[-0.016947];842.522537[-0.016947];842.511337[-0.005747];842.474945[0.030645];842.474945[0.030645];842.490204[0.015386]	IVTLLER/;LVTLLER/;VLTIQNR/;LVTILRE/;LVTLLRE/;VIVDVSLV/;VLVDDGLI/;VLVDTSIP/;LVVDIVW/	45.060000;45.060000;30.720000;29.910000;29.910000;29.110000;29.110000;29.110000;28.580000	0.000031;0.000031;0.000847;0.001021;0.001021;0.001227;0.001227;0.001227;0.000000	0.000000;14.340000;0.810000;0.000000;0.800000;0.000000;0.000000;0.530000;NA	0.104988239247;0.104988239247;0.003864921276;0.003207307887;0.003207307887;0.002667722503;0.002667722503;0.002667722503;0.002361242830	0.481713;0.481713;0.016818;0.013952;0.013952;0.011601;0.011601;0.011601;0.010267
query13918	733.367	2197.08	3	2197.09	-0.016519	L	NGGSHAGGALALQEFMIAPTGAK	T			53.43	1	0	gi|00924	41.48	0.999846	38.13	131007_Sam_Standard_02_p.04711.04711.3	2197.081253[-0.002801];2197.141907[-0.063455];2197.039520[0.038932];2196.995728[0.082724];2197.139191[-0.060739];2197.149124[-0.070672];2197.110229[-0.031777];2197.149124[-0.070672];2197.157166[-0.078714]	PANMFVAGFIGSPAMNFIRGT/;AVAHLTTLQEIQAFDLWIE/;EIGITGCNFAVAETGSVCLVTN/;GDGSRAIDSSGMGVAQLDEYIG/;DNRIHAVSIKAYTPAEWAR/;RLGAPAGSQPGDSKIQFSIATP/;RTMFIGGLQGAKWEIPHQE/;SAGDTFSLVGEKLLLGRHNPS/;AGIQCAKGMLSAGGIRNRNIPA/	11.950000;5.400000;3.900000;3.480000;3.390000;3.220000;3.040000;2.820000;2.700000	0.063826;0.288403;0.407380;0.448745;0.458142;0.476431;0.496592;0.522396;0.000000	6.550000;1.500000;0.420000;0.090000;0.170000;0.180000;0.220000;0.120000;NA	0.000071110412;0.000015737408;0.000011141231;0.000010114239;0.000009906795;0.000009526496;0.000009139726;0.000008688268;0.000008451488	0.000309;0.000068;0.000048;0.000044;0.000043;0.000041;0.000040;0.000038;0.000037
query1609	516.27	1030.53	2	1030.51	0.016895	R	IGSEVYHNL	K			53.4	1	0	gi|00924	15.49	0.966278	14.7208	131007_Sam_Standard_02_p.02658.02658.2	1030.519577[0.005665];1030.493958[0.031284];1030.515549[0.009693];1030.519577[0.005665];1030.493073[0.032169];1030.508331[0.016911];1030.511734[0.013508];1030.529495[-0.004253];1030.555496[-0.030254]	LGSDYLHAR/;IGCIVMNANP/;LGSGNNAATRA/;IGYSIDHRA/;IGSENAEQAL/;LGSEAAAYHI/;NGEVCLGGGII/;LGSNNTVLVD/;IGSPMVALMI/	37.910000;25.530000;24.530000;23.270000;23.000000;23.000000;20.160000;16.940000;16.930000	0.000162;0.002799;0.003524;0.004710;0.005012;0.005012;0.009638;0.020230;0.000000	12.380000;1.000000;1.260000;0.270000;0.000000;2.840000;3.220000;0.010000;NA	0.027296185475;0.001577981693;0.001253435413;0.000937782147;0.000881255744;0.000881255744;0.000458249459;0.000218324242;0.000217822110	0.120194;0.006859;0.005447;0.004075;0.003829;0.003829;0.001991;0.000948;0.000946
query7327	776.894	1551.77	2	1551.77	0.006032	N	AQEYYDRIPELR	Q			53.08	1	0	gi|00489	30.15	0.997155	25.4587	131007_Sam_Standard_01_p.03786.03786.2	1551.750381[0.023763];1551.760254[0.013890];1551.761124[0.013020];1551.720520[0.053624];1551.827164[-0.053020];1551.848297[-0.074153];1551.793289[-0.019145];1551.782745[-0.008601];1551.829697[-0.055553]	CLYTWRDTEPLR/;CLAIIINYLSNSDN/;CALPELICRYMQL/;TDAEWLEAIDFSR/;LAWFAAFECLLLR/;LMLDQYFQLLIR/;PDTLSEYAFAGLLR/;TLALDHGKNPDCIR/;YEGAVFVTDGILLR/	22.930000;22.450000;19.100000;14.000000;13.070000;13.070000;13.070000;13.070000;13.070000	0.005093;0.005689;0.012303;0.039811;0.049317;0.049317;0.049317;0.049317;0.000000	0.480000;3.350000;5.100000;0.930000;0.000000;0.000000;0.000000;0.000000;NA	0.000963302185;0.000862506835;0.000398806791;0.000123243081;0.000099486132;0.000099486132;0.000099486132;0.000099486132;0.000099486132	0.004186;0.003747;0.001732;0.000535;0.000432;0.000432;0.000432;0.000432;0.000432
query1734	522.302	1042.59	2	1042.58	0.004705	T	TVLVGMPAGAK	C			52.74	1	0	gi|00330	25.85	0.98954	19.8048	131007_Sam_Standard_01_p.02800.02800.2	1042.565872[0.023336];1042.522934[0.066274];1042.554642[0.034566];1042.653885[-0.064677];1042.613495[-0.024287];1042.581131[0.008077];1042.642654[-0.053446];1042.565857[0.023351];1042.581116[0.008092]	EAIVGAGTVLN/;CPLRADIAAN/;VTLEVLSEPG/;LSIVAVWKK/;SLLVGAQTVR/;SLVLIGFSAH/;SLILFALIPG/;ISLVEETRP/;LSIVQAIWN/	26.890000;24.980000;24.790000;24.270000;24.230000;19.890000;19.780000;18.950000;18.950000	0.002046;0.003177;0.003319;0.003741;0.003776;0.010257;0.010520;0.012735;0.000000	1.910000;0.190000;0.520000;0.040000;4.340000;0.110000;0.830000;0.000000;NA	0.002572962702;0.001657423494;0.001586475942;0.001407451670;0.001394548075;0.000513373552;0.000500533893;0.000413459991;0.000413459991	0.011189;0.007204;0.006895;0.006117;0.006061;0.002230;0.002174;0.001796;0.001796
query411	435.236	868.457	2	868.444	0.013157	K	FAAYLER	E			52.71	1	0	gi|00489	8.71	0.792787	6.83582	131007_Sam_Standard_02_p.02558.02558.2	868.396683[0.060749];868.444275[0.013157];868.363663[0.093769];868.469437[-0.012005];868.363663[0.093769];868.469452[-0.012020];868.378922[0.078510];868.407898[0.049534];868.411255[0.046177]	FAAFEIDG/;FAAYIRE/;FAADCLET/;AFLYALAT/;DCAYPIST/;AFFSIITA/;WCYLLDG/;AFAEFER/;MSALYER/	44.000000;43.020000;29.120000;28.810000;28.450000;27.060000;25.110000;24.060000;24.060000	0.000040;0.000050;0.001225;0.001315;0.001429;0.001968;0.003083;0.003926;0.000000	0.980000;13.900000;0.310000;0.360000;1.390000;1.950000;1.050000;0.000000;NA	0.106698013073;0.085144447574;0.003468616871;0.003229656485;0.002972735929;0.002158521268;0.001377705309;0.001081823303;0.001081823303	0.490017;0.386475;0.015090;0.014049;0.012930;0.009384;0.005987;0.004701;0.004701
query726	461.756	921.498	2	921.481	0.016913	K	AEFVEVTK	L			52.71	1	0	gi|02769	26	0.988387	19.3505	131007_Sam_Standard_01_p.02147.02147.2	921.426620[0.071036];921.434464[0.063192];921.444336[0.053320];921.491989[0.005667];921.480743[0.016913];921.480759[0.016897];921.480743[0.016913];921.491974[0.005682];921.444366[0.053290]	AEVFVTCPG/;AEFVRDW/;AEFAKELD/;HPLVEVQT/;TVKVFEEA/;FSLVEVTQ/;EAVFDIKT/;AGSLFAQKT/;AEFDGALTV/	26.710000;26.430000;25.900000;25.800000;22.310000;21.240000;18.690000;18.510000;18.270000	0.002133;0.002275;0.002570;0.002630;0.005875;0.007516;0.013521;0.014093;0.000000	0.280000;0.530000;0.100000;3.490000;1.070000;2.550000;0.180000;0.240000;NA	0.002482715642;0.002327699860;0.002060283481;0.002013385703;0.000901419566;0.000704574596;0.000391676018;0.000375774219;0.000355571530	0.010796;0.010121;0.008957;0.008753;0.003917;0.003061;0.001701;0.001632;0.001545
query653	457.77	913.525	2	913.513	0.01186	Y	FALAHTVR	D			52.29	1	0	gi|00489	14.27	0.940981	12.2901	131007_Sam_Standard_03_p.03761.03761.2	913.523239[0.002003];913.523239[0.002003];913.512024[0.013218];913.534485[-0.009243];913.465744[0.059498];913.476974[0.048268];913.512024[0.013218];913.498093[0.027149];913.439255[0.085987]	RILEALAE/;LAAGKAAIAE/;TSLPIALAE/;RGAVAKLAE/;FAIAEHIN/;FALAREHA/;IGLVEAIAE/;QRLNALAE/;EPDVAALAE/	38.020000;29.850000;27.770000;27.400000;27.250000;27.250000;26.020000;25.840000;25.170000	0.000158;0.001035;0.001671;0.001820;0.001884;0.001884;0.002500;0.002606;0.000000	8.170000;2.080000;0.370000;0.150000;0.000000;1.230000;0.180000;0.670000;NA	0.035203102321;0.005365138503;0.003323387163;0.003051974762;0.002948362902;0.002948362902;0.002221165596;0.002130987675;0.001826337085	0.155641;0.023363;0.014457;0.013275;0.012823;0.012823;0.009657;0.009265;0.007939
query66	409.73	817.445	2	817.429	0.016103	C	TESLVNR	R			52.13	1	0	gi|02769	3.8	0.698723	5.21034	131007_Sam_Standard_02_p.02535.02535.2	817.454514[-0.009044];817.447998[-0.002528];817.429367[0.016103];817.429382[0.016088];817.404205[0.041265];817.418152[0.027318];817.392975[0.052495];817.454544[-0.009074];817.418137[0.027333]	TESLGKAL/;MVSLVRN/;TESKPTR/;TESGLRVG/;TEAERGR/;ETSLNVGV/;ETEAVNR/;TTGQSLIV/;TESSLGKP/	48.330000;30.580000;24.760000;23.120000;21.730000;21.700000;21.660000;21.240000;20.560000	0.000015;0.000875;0.003342;0.004875;0.006714;0.006761;0.006823;0.007516;0.000000	17.750000;5.820000;1.640000;1.390000;0.030000;0.040000;0.420000;0.680000;NA	0.291276157675;0.004889955839;0.001280279929;0.000877616818;0.000637242800;0.000632856051;0.000627053992;0.000569252487;0.000486748853	1.495230;0.021289;0.005564;0.003813;0.002768;0.002749;0.002724;0.002473;0.002114
query1509	509.769	1017.52	2	1017.49	0.034779	V	AAAFPGDVDR	L			52.04	1	0	gi|00489	34.67	0.998463	28.1343	131007_Sam_Standard_02_p.02519.02519.2	1017.549500[-0.026760];1017.462311[0.060429];1017.524338[-0.001598];1017.443695[0.079045];1017.516479[0.006261];1017.509064[0.013676];1017.491302[0.031438];1017.462784[0.059956];1017.487946[0.034794]	AAAFIPGSSVV/;AALAMGQMPE/;VNFPDRLSA/;DEANMPQTL/;LMSTQPTQL/;ASAIDEVASR/;NVALMEDRA/;DERGEAWR/;AANDSAKWGV/	17.370000;15.490000;14.750000;14.650000;14.650000;13.470000;11.960000;11.950000;11.580000	0.018323;0.028249;0.033497;0.034277;0.034277;0.044978;0.063680;0.063826;0.000000	1.880000;0.740000;0.100000;0.000000;1.180000;1.510000;0.010000;0.370000;NA	0.000340668627;0.000220969402;0.000186351177;0.000182109306;0.000182109306;0.000138781680;0.000098023937;0.000097798488;0.000089811539	0.001480;0.000960;0.000809;0.000791;0.000791;0.000603;0.000426;0.000425;0.000390
query1988	534.815	1067.61	2	1067.6	0.017125	N	PGLAEIIAER	I			51.95	1	0	gi|00489	26.01	0.995757	23.7236	131007_Sam_Standard_03_p.05497.05497.2	1067.597473[0.017125];1067.622650[-0.008052];1067.528748[0.085850];1067.677658[-0.063060];1067.586258[0.028340];1067.633865[-0.019267];1067.637909[-0.023311];1067.597504[0.017094];1067.579727[0.034871]	GPIEAIIEAR/;PGLAADLVLSL/;VAPAEYGKFS/;PGICKLLLIV/;PGIEQVALIE/;PGIIRESLAL/;PGLILIASVW/;PGLLVLADRD/;PGLPIERCAI/	25.940000;19.670000;14.580000;14.080000;14.080000;14.080000;14.080000;14.080000;14.080000	0.002547;0.010789;0.034834;0.039084;0.039084;0.039084;0.039084;0.039084;0.000000	6.270000;5.090000;0.500000;0.000000;0.000000;0.000000;0.000000;0.000000;NA	0.002495476692;0.000589051841;0.000182454054;0.000162612347;0.000162612347;0.000162612347;0.000162612347;0.000162612347;0.000162612347	0.010851;0.002559;0.000792;0.000706;0.000706;0.000706;0.000706;0.000706;0.000706
query5489	688.872	1375.73	2	1375.72	0.012761	L	ALQEFMIAPTGAK	T			51.69	1	0	gi|00924	36.86	0.999353	31.889	131007_Sam_Standard_01_p.03971.03971.2	1375.669144[0.060566];1375.782333[-0.052623];1375.673172[0.056538];1375.771103[-0.041393];1375.698380[0.031330];1375.712906[0.016804];1375.702362[0.027348];1375.640152[0.089558];1375.745956[-0.016246]	RTSKDNKNDADI/;ISGASGAIYGVRLL/;EAGKASEDFPRIG/;LAQESQIKVLTF/;GGVVEFIDAGQVVS/;EARATKMVSEAIA/;AVSEEFGLAPFLP/;QAIEKVCSDQNAA/;RGDLGFALSGISIA/	14.830000;11.140000;10.730000;9.490000;8.620000;8.460000;8.400000;7.250000;6.930000	0.032885;0.076913;0.084528;0.112460;0.137404;0.142561;0.144544;0.188365;0.000000	3.690000;0.410000;1.240000;0.870000;0.160000;0.060000;1.150000;0.320000;NA	0.000205929607;0.000088047857;0.000080115914;0.000060216955;0.000049285457;0.000047502754;0.000046850992;0.000035951647;0.000033397872	0.000894;0.000382;0.000348;0.000262;0.000214;0.000206;0.000203;0.000156;0.000145
query4587	434.259	1299.76	3	1299.74	0.015845	G	LAGVENVTELKK	N			51.36	1	0	gi|00489	35.94	0.998713	28.9033	131007_Sam_Standard_02_p.02715.02715.3	1299.751007[0.004630];1299.703415[0.052222];1299.783554[-0.027917];1299.722015[0.033622];1299.748520[0.007117];1299.710815[0.044822];1299.682251[0.073386];1299.678238[0.077399];1299.655807[0.099830]	AIKLSAARAADTL/;AIGVLEQQSDLK/;IAATAMASLLLLI/;LALIDKNAMAQL/;LAGKRILWNMV/;ALGVELPIMISGT/;IAREALAWIEE/;IARELNLTNEQ/;IAVGEAVDDGIEL/	15.420000;14.690000;12.980000;12.840000;12.650000;12.020000;11.220000;11.220000;10.830000	0.028708;0.033963;0.050350;0.052000;0.054325;0.062806;0.075509;0.075509;0.000000	0.730000;1.710000;0.140000;0.190000;0.630000;0.800000;0.000000;0.390000;NA	0.000254355176;0.000215001049;0.000145024234;0.000140423754;0.000134412785;0.000116262747;0.000096703141;0.000096703141;0.000088397621	0.001105;0.000934;0.000630;0.000610;0.000584;0.000505;0.000420;0.000420;0.000384
query1007	478.793	955.571	2	955.56	0.010259	E	PNKFVVPR	T			51.18	1	0	gi|00489	23.4	0.989912	19.962	131007_Sam_Standard_02_p.02056.02056.2	955.487564[0.083028];955.487579[0.083013];955.519913[0.050679];955.508667[0.061925];955.545059[0.025533];955.527954[0.042638];955.574234[-0.003642];955.549088[0.021504];955.502167[0.068425]	PNKFHNVT/;PNKVFHTGG/;PGGQDAKRK/;PNKQVNEK/;PNKTDIRL/;PNKWLWI/;PEIFKILP/;PNFKIQLP/;PRGICTGRP/	27.780000;26.070000;18.070000;18.070000;18.070000;18.070000;14.540000;14.190000;13.360000	0.001667;0.002472;0.015596;0.015596;0.015596;0.015596;0.035156;0.038107;0.000000	1.710000;8.000000;0.000000;0.000000;0.000000;3.530000;0.350000;0.830000;NA	0.004524771613;0.003052085272;0.000483722917;0.000483722917;0.000483722917;0.000483722917;0.000214583667;0.000197968760;0.000163529709	0.019695;0.013275;0.002101;0.002101;0.002101;0.002101;0.000932;0.000860;0.000710
query2550	558.823	1115.63	2	1115.62	0.013554	A	GVENVTELKK	N			50.79	1	0	gi|00489	20.41	0.985856	18.4944	131007_Sam_Standard_01_p.02709.02709.2	1115.579544[0.052632];1115.586945[0.045231];1115.629852[0.002324];1115.575684[0.056492];1115.568329[0.063847];1115.666229[-0.034053];1115.583572[0.048604];1115.593460[0.038716];1115.618607[0.013569]	AGGSAKQARDR/;AAMRTSVPQR/;KIASVQNTQK/;KPEEMAKQR/;VGELSGGERGR/;KLVDETKKR/;KDVEQWRR/;AGDQGAASAIKK/;AGLKTELEQK/	30.380000;20.500000;19.320000;19.060000;19.030000;19.030000;18.960000;18.460000;16.270000	0.000916;0.008913;0.011695;0.012417;0.012503;0.012503;0.012706;0.014256;0.000000	9.880000;1.180000;0.260000;0.030000;0.000000;0.070000;0.500000;2.190000;NA	0.008970437870;0.000922175633;0.000702770694;0.000661932405;0.000657375694;0.000657375694;0.000646864984;0.000576519024;0.000348187874	0.039134;0.004007;0.003053;0.002876;0.002856;0.002856;0.002810;0.002505;0.001512
query6347	728.343	1454.67	2	1454.67	0.003117	K	YDLDFKNPNSDK	S			50.73	1	0	gi|00924	35.59	0.999261	31.3107	131007_Sam_Standard_03_p.02572.02572.2	1454.617661[0.053211];1454.715378[-0.044506];1454.711548[-0.040676];1454.715561[-0.044689];1454.631363[0.039509];1454.747925[-0.077053];1454.638763[0.032109];1454.690231[-0.019359];1454.718079[-0.047207]	SDQWWVFDIME/;YDIDGAFVAKNSR/;FKGLMDVASDIYP/;LDFMEYPIPALF/;YDNNYPEDQAVK/;MLSPPLDAAPPSFI/;ADVGEKYWDIME/;DYLDRQGVYNGR/;LTDEVYLDDLLF/	15.140000;11.340000;10.890000;7.800000;7.270000;6.490000;6.430000;6.430000;6.430000	0.030620;0.073451;0.081470;0.165959;0.187499;0.224388;0.227510;0.227510;0.000000	3.800000;0.450000;3.090000;0.530000;0.780000;0.060000;0.000000;0.000000;NA	0.000275853644;0.000114994938;0.000103676117;0.000050895423;0.000045048333;0.000037642523;0.000037126048;0.000037126048;0.000037126048	0.001198;0.000499;0.000450;0.000221;0.000196;0.000163;0.000161;0.000161;0.000161
query4126	632.356	1262.7	2	1262.7	-0.000285	R	QRLPAPDEKIP	-			50.67	1	0	gi|00489	22.43	0.988749	19.4881	131007_Sam_Standard_02_p.02479.02479.2	1262.607269[0.090703];1262.723419[-0.025447];1262.661896[0.036076];1262.675781[0.022191];1262.738693[-0.040721];1262.650665[0.047307];1262.723434[-0.025462];1262.723419[-0.025447];1262.705658[-0.007686]	DQLMSCLMLLP/;LKDEVLHSLLP/;QDINVAHSGLPL/;NEIPEELPLLP/;QPVLGWLLLQP/;DQVAPVAPEPIQ/;LQVPQIDLLQP/;DLILPLQNQLP/;DKILLFIRMD/	28.240000;25.700000;19.030000;16.840000;16.440000;15.290000;14.600000;14.350000;14.340000	0.001500;0.002692;0.012503;0.020701;0.022699;0.029580;0.034674;0.036728;0.000000	2.540000;6.670000;2.190000;0.400000;1.150000;0.690000;0.250000;0.010000;NA	0.005650488857;0.003148371866;0.000677775745;0.000409341732;0.000373324097;0.000286474535;0.000244391458;0.000230720414;0.000230189772	0.024609;0.013695;0.002945;0.001778;0.001622;0.001244;0.001062;0.001002;0.001000
query915	474.247	946.479	2	946.451	0.028433	A	AAFPGDVDR	L			50.65	1	0	gi|00489	22.44	0.971195	15.4053	131007_Sam_Standard_02_p.02506.02506.2	946.471970[0.007314];946.471970[0.007314];946.471970[0.007314];946.515747[-0.036463];946.508362[-0.029078];946.515762[-0.036478];946.446823[0.032461];946.544754[-0.065470];946.491257[-0.011973]	IASDTGLDR/;ALSDGDTLR/;AATVESVDR/;MALQTLGIT/;TDARTLGIT/;ACLVTAVGLT/;NGGNTTLDR/;LRTTSVLGT/;TWALWAVT/	28.210000;26.260000;25.900000;25.730000;25.730000;25.560000;24.960000;24.390000;24.390000	0.001510;0.002366;0.002570;0.002673;0.002673;0.002780;0.003192;0.003639;0.000000	1.950000;0.360000;0.170000;0.000000;0.170000;0.600000;0.570000;0.000000;NA	0.005537405581;0.003534323791;0.003253166820;0.003128285157;0.003128285157;0.003008197418;0.002620030422;0.002297768832;0.002297768832	0.024115;0.015377;0.014151;0.013607;0.013607;0.013084;0.011394;0.009991;0.009991
query7994	807.415	1612.81	2	1612.82	-0.005976	C	AYTNHTVLPEALER	W			50.63	1	0	gi|00489	37.91	0.998995	29.9796	131007_Sam_Standard_01_p.03183.03183.2	1612.862015[-0.047099];1612.733719[0.081197];1612.901062[-0.086146];1612.791916[0.023000];1612.882462[-0.067546];1612.719147[0.095769];1612.855942[-0.041026];1612.864517[-0.049601];1612.814377[0.000539]	VLCDRTVRPYVHR/;AQVCNAAEIAMEHNL/;PVFAATLLIPCIAER/;PNMSFHLEAILGEVG/;RFLAVTVDELSVPAP/;GQIDHYLAPMPEDQ/;TAIDASEVILALAPET/;GRRSRTITVVDEQP/;APNSCRLALTHFNGL/	12.720000;12.500000;12.130000;11.750000;10.650000;10.280000;9.780000;9.720000;8.650000	0.053456;0.056234;0.061235;0.066834;0.086099;0.093756;0.105196;0.106660;0.000000	0.220000;0.370000;0.380000;1.100000;0.370000;0.500000;0.060000;1.070000;NA	0.000161645433;0.000153660924;0.000141111835;0.000129289555;0.000100360644;0.000092164451;0.000082141653;0.000081014628;0.000063323285	0.000702;0.000667;0.000613;0.000562;0.000436;0.000400;0.000357;0.000352;0.000275
query4353	639.825	1277.64	2	1277.63	0.011036	V	DDEAFIRDVAK	V			50.6	1	0	gi|00489	29	0.997265	25.6301	131007_Sam_Standard_03_p.04398.04398.2	1277.647156[-0.010952];1277.600006[0.036198];1277.580902[0.055302];1277.687576[-0.051372];1277.661545[-0.025341];1277.564484[0.071720];1277.625168[0.011036];1277.571030[0.065174];1277.636429[-0.000225]	ETMLMGKGNGIK/;DDEAFRQLRE/;DDISMEKELQA/;TAMVGKLFAPIM/;KGGLSYLEAVNQ/;ETCPYCHRAKA/;NVLYETQNGIQ/;CSLEWQNTVAQ/;ITGSVDQFGRAQ/	21.600000;16.230000;15.240000;13.020000;12.960000;12.300000;11.450000;11.000000;10.650000	0.006918;0.023823;0.029923;0.049888;0.050582;0.058884;0.071614;0.079433;0.000000	5.370000;0.990000;2.220000;0.060000;0.660000;0.850000;0.450000;0.350000;NA	0.001255482006;0.000364594819;0.000290275574;0.000174104699;0.000171715893;0.000147506274;0.000121285950;0.000109347912;0.000100881259	0.005456;0.001584;0.001261;0.000756;0.000746;0.000641;0.000527;0.000475;0.000438
query852	471.789	941.563	2	941.555	0.00884	A	NELLINVK	Y			50.56	1	0	gi|00330	13.15	0.92184	11.0702	131007_Sam_Standard_02_p.03340.03340.2	941.565781[-0.002391];941.518188[0.045202];941.602158[-0.038768];941.590942[-0.027552];941.540619[0.022771];941.518173[0.045217];941.518173[0.045217];941.577011[-0.013621];941.518188[0.045202]	NELLLRGK/;STGINLLPQ/;SRLILAKAA/;SRLLLLEV/;NELIARRA/;NELIQVLN/;NELLGVAIN/;AATILRAAR/;ENLLAGVQV/	37.410000;28.660000;28.260000;28.260000;26.640000;26.640000;26.640000;25.310000;25.310000	0.000182;0.001361;0.001493;0.001493;0.002168;0.002168;0.002168;0.002944;0.000000	8.750000;0.400000;0.000000;1.620000;0.000000;0.000000;1.330000;0.000000;NA	0.044632956823;0.005951900450;0.005428197726;0.005428197726;0.003738140829;0.003738140829;0.003738140829;0.002752045810;0.002752045810	0.198297;0.025926;0.023639;0.023639;0.016265;0.016265;0.016265;0.011968;0.011968
query1591	514.767	1027.52	2	1027.5	0.01647	A	GWGVMVSHR	S			50.38	1	0	gi|00924	22.72	0.99214	21.0457	131007_Sam_Standard_01_p.02528.02528.2	1027.584839[-0.066187];1027.500839[0.017813];1027.577408[-0.058756];1027.577408[-0.058756];1027.566193[-0.047541];1027.559677[-0.041025];1027.518600[0.000052];1027.588654[-0.070002];1027.577438[-0.058786]	GSVRMVGIPL/;LISCPDVGQP/;NERIVLER/;ENRVLERL/;EIRETGVKP/;ACGVKGIRPGA/;LTSPDLTGPQ/;KSRSVARPAG/;KDGVRVQLN/	27.660000;19.600000;17.380000;14.830000;14.420000;13.610000;13.150000;12.420000;12.090000	0.001714;0.010965;0.018281;0.032885;0.036141;0.043551;0.048417;0.057280;0.000000	8.060000;2.220000;2.550000;0.410000;0.810000;0.460000;0.730000;0.330000;NA	0.005303626259;0.000829035088;0.000497247848;0.000276422196;0.000251520225;0.000208724251;0.000187746959;0.000158698533;0.000147086533	0.023095;0.003602;0.002160;0.001201;0.001092;0.000907;0.000815;0.000689;0.000639
query10902	630.318	1887.93	3	1887.92	0.011345	R	HPYFYAPELLYYANK	Y			50.28	1	0	gi|02769	36.35	0.999296	31.5239	131007_Sam_Standard_03_p.04895.04895.3	1887.947891[-0.017021];1887.961151[-0.030281];1887.999557[-0.068687];1887.962463[-0.031593];1888.027390[-0.096520];1887.984283[-0.053413];1887.915543[0.015327];1887.994171[-0.063301];1887.917404[0.013466]	FLFTDKDGEKYGRANK/;LAGLTEEAVDITMGARIE/;IFANVFSYVVFGQRNK/;NPAPDLADAMKGYRKKN/;GMSMGGLAKREIAILLTAG/;SFPRGKLNGDFPSELPK/;FIAHQYADLLEFVADH/;RTDTAILEITLEHITY/;TPSGSDATTRVDLQQAIE/	13.930000;12.020000;8.360000;7.240000;6.880000;6.860000;6.630000;6.050000;6.020000	0.040458;0.062806;0.145881;0.188799;0.205116;0.206063;0.217270;0.248313;0.000000	1.910000;3.660000;1.120000;0.360000;0.020000;0.230000;0.580000;0.030000;NA	0.000231576305;0.000149174339;0.000064223522;0.000049624269;0.000045676637;0.000045466772;0.000043121526;0.000037730636;0.000037470900	0.001006;0.000648;0.000279;0.000216;0.000198;0.000197;0.000187;0.000164;0.000163
query982	477.76	953.506	2	953.497	0.008976	V	IFLENYR	V			50.24	1	0	gi|00489	21.07	0.964633	14.514	131007_Sam_Standard_02_p.03839.03839.2	953.558609[-0.052593];953.533463[-0.027447];953.522217[-0.016201];953.522217[-0.016201];953.518173[-0.012157];953.489197[0.016819];953.544662[-0.038646];953.533432[-0.027416];953.544662[-0.038646]	IFKFSVLT/;LFQHPVLT/;IFLYVAQT/;LFILFTSN/;LQLPELQN/;IFMEKVST/;IFIRYSR/;IFLYTAAR/;IFSRLYR/	29.170000;29.170000;28.720000;28.200000;24.020000;22.490000;21.320000;21.320000;20.660000	0.001211;0.001211;0.001343;0.001514;0.003963;0.005636;0.007379;0.007379;0.000000	0.000000;0.450000;0.520000;4.180000;1.530000;1.170000;0.000000;0.660000;NA	0.007539837231;0.007539837231;0.006797699630;0.006030620095;0.002303360795;0.001619429218;0.001236977985;0.001236977985;0.001062580815	0.032869;0.032869;0.029623;0.026270;0.010015;0.007039;0.005375;0.005375;0.004617
query2217	543.322	1084.63	2	1084.6	0.026325	K	EPNKFVVPR	T			50.16	1	0	gi|00489	27.9	0.992599	21.307	131007_Sam_Standard_01_p.02052.02052.2	1084.635284[-0.006038];1084.631439[-0.002193];1084.587662[0.041584];1084.635239[-0.005993];1084.624039[0.005207];1084.635284[-0.006038];1084.639328[-0.010082];1084.598892[0.030354];1084.646515[-0.017269]	DRVVIGASIR/;LNIKTMIPGV/;EIGAVEVVNR/;LARKEEAIR/;LLANGETVLR/;LGVAKQTVNR/;GVFIAGGIVPR/;AERLQVVDR/;DRVRVATLR/	22.260000;21.310000;19.400000;18.970000;18.960000;18.410000;18.310000;17.650000;14.790000	0.005943;0.007396;0.011482;0.012677;0.012706;0.014421;0.014757;0.017179;0.000000	0.950000;1.910000;0.430000;0.010000;0.550000;0.100000;0.660000;2.860000;NA	0.001609806949;0.001293521936;0.000833247075;0.000754699041;0.000752963281;0.000663397450;0.000648296681;0.000556895615;0.000288252975	0.006997;0.005621;0.003620;0.003279;0.003271;0.002882;0.002816;0.002419;0.001252
query2033	536.785	1071.56	2	1071.53	0.020497	R	EIWGVEPSR	Q			50.11	1	0	gi|00489	23.25	0.988401	19.3559	131007_Sam_Standard_02_p.03033.03033.2	1071.556015[-0.000621];1071.567230[-0.011836];1071.509262[0.046132];1071.556046[-0.000652];1071.538269[0.017125];1071.544800[0.010594];1071.544785[0.010609];1071.556000[-0.000606];1071.592422[-0.037028]	EIGERLIDQ/;ELRDAELRA/;EIMPNIPQM/;QGDQGDLVLK/;EMINVDRVP/;EQTDLGSPLI/;ELDQLDNII/;ELENVIERA/;DVVREDVIK/	26.860000;22.310000;20.850000;20.100000;19.490000;18.890000;18.340000;16.540000;16.480000	0.002061;0.005875;0.008222;0.009772;0.011246;0.012912;0.014655;0.022182;0.000000	4.550000;1.460000;0.750000;0.610000;0.600000;0.550000;1.800000;0.060000;NA	0.004676632550;0.001640337631;0.001172015211;0.000986127904;0.000856906127;0.000746334037;0.000657556762;0.000434443444;0.000428482657	0.020358;0.007130;0.005093;0.004285;0.003723;0.003242;0.002857;0.001887;0.001861
query269	423.735	845.455	2	845.424	0.030278	I	SDLDQLR	K			50.07	1	0	gi|00489	17.13	0.865283	8.70578	131007_Sam_Standard_03_p.04417.04417.2	845.442917[0.011647];845.424286[0.030278];845.460678[-0.006114];845.424271[0.030293];845.424286[0.030278];845.460663[-0.006099];845.460663[-0.006099];845.460663[-0.006099];845.424286[0.030278]	VCLDQIR/;SDIALDGR/;SDIISGVR/;SDINLER/;SDLADGLR/;SDLEKVR/;SEVDLKR/;SVEDIKR/;SVEDQIR/	32.940000;32.520000;32.520000;32.520000;32.520000;32.520000;32.150000;32.150000;32.150000	0.000508;0.000560;0.000560;0.000560;0.000560;0.000560;0.000610;0.000610;0.000000	0.420000;0.000000;0.000000;0.000000;0.000000;0.370000;0.000000;0.000000;NA	0.016755531546;0.015211015532;0.015211015532;0.015211015532;0.015211015532;0.015211015532;0.013968771388;0.013968771388;0.013968771388	0.073385;0.066568;0.066568;0.066568;0.066568;0.066568;0.061093;0.061093;0.061093

## Sheet: DS_NES_207
Table S-2. (Peptides Identified by DS in NES search)
Query Number	Observed m/z	Observed MW	Observed Charge State	Theoretical MW	MW Error	Residue Before	Seq	Residue After	Modification	Mod Location	Mascot Score	Unique	Missed Cleavage	Accession	DS	Contribution Fraction C1	CS	Title	Subranked Theoretical MW[Error]	Subranked Seq/Mod[Loc]	Subranked Mascot Scores	Subranked Random Matched Probabilities	Subranked MDScores	Subranked Contibution Fractions	Subranked Contribution Scores
query7251	771.371	1540.73	2	1540.73	-0.002985	V	PSGASTGVHEALEMR	D			128.56	1	0	gi|00924	115.98	1	110.726	131007_Sam_Standard_03_p.03486.03486.2	1540.784546[-0.057154];1540.756866[-0.029474];1540.806961[-0.079569];1540.811035[-0.083643];1540.811005[-0.083613];1540.719818[0.007574];1540.762054[-0.034662];1540.736893[-0.009501];1540.751678[-0.024286]	GVVGEESRGIGTNPGI/;ALGACGRTRNAASFF/;KPSSSNSRSKGHAKA/;PGTGSGRVRQVIEW/;LAGAARAEGKFHNVT/;AALGSFAGAVVDWYD/;PSGDSNIELGPTEIL/;LQAGLNQSDDPAEIA/;KIVEYDDMITAML/	12.580000;9.850000;9.080000;6.760000;6.410000;6.310000;6.250000;5.650000;5.540000	0.055208;0.103514;0.123595;0.210863;0.228560;0.233884;0.237137;0.272270;0.000000	2.730000;0.770000;2.320000;0.350000;0.100000;0.060000;0.600000;0.110000;NA	0.000000000003;0.000000000001;0.000000000001;0.000000000001;0.000000000001;0.000000000001;0.000000000001;0.000000000001;0.000000000000	0.000000;0.000000;0.000000;0.000000;0.000000;0.000000;0.000000;0.000000;0.000000
query8334	820.905	1639.8	2	1639.8	-0.002558	I	VPSGASTGVHEALEMR	D			117.8	1	0	gi|00924	106.38	1	100.91	131007_Sam_Standard_03_p.03493.03493.2	1639.866867[-0.070627];1639.798782[-0.002542];1639.795410[0.000830];1639.732544[0.063696];1639.890182[-0.093942];1639.722183[0.074057];1639.770477[0.025763];1639.839188[-0.042948];1639.831818[-0.035578]	KIADPGDPTIDLVLSS/;QIIGSSQMYATAQSR/;DYRRFNQILEGET/;ADRGLNADLDTSEYT/;KIMSHATRPAVMSLV/;ENQVEGMCALFLGET/;VPTMNGAWYAEFVVG/;QLAVKGEYFDAMIR/;PAHSILVDEQRQTF/	11.420000;9.080000;7.230000;6.200000;6.130000;5.620000;5.430000;5.020000;4.830000	0.072111;0.123595;0.189234;0.239883;0.243781;0.274157;0.286418;0.314775;0.000000	2.340000;1.850000;1.030000;0.070000;0.510000;0.190000;0.410000;0.190000;NA	0.000000000023;0.000000000013;0.000000000009;0.000000000007;0.000000000007;0.000000000006;0.000000000006;0.000000000005;0.000000000005	0.000000;0.000000;0.000000;0.000000;0.000000;0.000000;0.000000;0.000000;0.000000
query9847	895.42	1788.83	2	1788.84	-0.011302	K	AAQDSFAAGWGVMVSHR	S			120.21	1	0	gi|00924	100.87	1	98.6704	131007_Sam_Standard_01_p.04282.04282.2	1788.865555[-0.040263];1788.922592[-0.097300];1788.880829[-0.055537];1788.896637[-0.071345];1788.821991[0.003301];1788.908676[-0.083384];1788.900650[-0.075358];1788.907806[-0.082514];1788.868958[-0.043666]	WSQAFAARGTPNEQAR/;NEAVLIGQLECKSMVR/;NRIASSWQWGQFPRG/;VTSSNTTAGGVATGSGLGPR/;WSAPWVDEKVHHDSP/;ITPQDAWTWAFLDLI/;NVGQSLSGQVSIGFAPGTA/;NRTTRQLSLTEEGER/;GGRPHDTAGPTKLCDKH/	19.340000;10.940000;10.800000;9.450000;8.360000;7.170000;6.350000;6.280000;4.420000	0.011641;0.080538;0.083176;0.113501;0.145881;0.191867;0.231739;0.235505;0.000000	8.400000;0.140000;1.350000;1.090000;1.190000;0.820000;0.070000;1.860000;NA	0.000000000082;0.000000000012;0.000000000011;0.000000000008;0.000000000007;0.000000000005;0.000000000004;0.000000000004;0.000000000003	0.000000;0.000000;0.000000;0.000000;0.000000;0.000000;0.000000;0.000000;0.000000
query10135	911.469	1820.92	2	1820.92	0.008305	R	SGETEDTFIADLVVGLR	T			121.63	1	0	gi|00924	100.69	1	97.8621	131007_Sam_Standard_01_p.06434.06434.2	1820.951996[-0.028072];1820.905716[0.018208];1820.913086[0.010838];1820.974426[-0.050502];1820.904404[0.019520];1820.989212[-0.065288];1820.884109[0.039815];1820.946808[-0.022884];1820.842834[0.081090]	IEESISSHPVVAEVAVVG/;SQNVYQFIDLQRVDP/;LAKMIVDAWLGAQYEGG/;RADEGKLPLALDSRPPS/;VEQSVEVAVFDGTTVEL/;MEKLPMIEHGLVVLAAA/;ATITGVLAMPMEAPSFW/;ACRLVVEEHLGHVRGF/;GESDDALDSFELAPVRT/	20.940000;12.790000;12.760000;12.570000;12.020000;11.650000;11.220000;9.520000;7.200000	0.008054;0.052602;0.052966;0.055335;0.062806;0.068391;0.075509;0.111686;0.000000	8.150000;0.030000;0.190000;0.550000;0.370000;0.430000;1.700000;2.320000;NA	0.000000000085;0.000000000013;0.000000000013;0.000000000012;0.000000000011;0.000000000010;0.000000000009;0.000000000006;0.000000000004	0.000000;0.000000;0.000000;0.000000;0.000000;0.000000;0.000000;0.000000;0.000000
query7656	790.91	1579.81	2	1579.82	-0.018352	R	QIIEQLSSGFFSPK	Q			110.93	1	0	gi|00489	94.57	1	88.3985	131007_Sam_Standard_01_p.05104.05104.2	1579.791580[0.014668];1579.879410[-0.073162];1579.850418[-0.044170];1579.831818[-0.025570];1579.831772[-0.025524];1579.839828[-0.033580];1579.893356[-0.087108];1579.865662[-0.059414];1579.831802[-0.025554]	KLKMVDPSSKAFDD/;LNAQGKPVDRIQNK/;AGLIKMSGNRSVGYK/;QLQGADLPKQGIQGQ/;TNIRIEELKEHQA/;IKLESAGAFWKAPY/;LIKESGIAGGVNAVPGV/;KLMSAGPLYHKKHA/;VAQKTPKSDHASLQA/	16.360000;14.600000;12.870000;12.160000;12.150000;11.850000;11.390000;11.110000;11.080000	0.023121;0.034674;0.051642;0.060814;0.060954;0.065313;0.072611;0.077446;0.000000	1.760000;1.730000;0.710000;0.010000;0.300000;0.460000;0.280000;0.030000;NA	0.000000000349;0.000000000233;0.000000000156;0.000000000133;0.000000000132;0.000000000124;0.000000000111;0.000000000104;0.000000000104	0.000000;0.000000;0.000000;0.000000;0.000000;0.000000;0.000000;0.000000;0.000000
query7032	760.37	1518.72	2	1518.7	0.021154	Q	DSFAAGWGVMVSHR	S			117.92	1	0	gi|00924	92.85	1	89.8136	131007_Sam_Standard_03_p.04232.04232.2	1518.736145[-0.011195];1518.732071[-0.007121];1518.767792[-0.042842];1518.738831[-0.013881];1518.750046[-0.025096];1518.822800[-0.097850];1518.713669[0.011281];1518.688507[0.036443];1518.724884[0.000066]	GTIDQNRWGRICT/;KNGSNRAGSRAAEAM/;GEYAQLAQINATQI/;SSFGVASVPPAIGMEA/;SDFARMIPAALDNV/;VGEILFAQMKAKNA/;ISMAGATSNTVHAYP/;MFADDVNKEASHR/;LMGAATRAAQGAEWS/	25.070000;23.540000;15.700000;11.040000;10.410000;10.280000;10.170000;9.590000;9.180000	0.003112;0.004426;0.026915;0.078705;0.090991;0.093756;0.096161;0.109901;0.000000	1.530000;7.840000;4.660000;0.630000;0.130000;0.110000;0.580000;0.410000;NA	0.000000000519;0.000000000365;0.000000000060;0.000000000021;0.000000000018;0.000000000017;0.000000000017;0.000000000015;0.000000000013	0.000000;0.000000;0.000000;0.000000;0.000000;0.000000;0.000000;0.000000;0.000000
query10312	920.957	1839.9	2	1839.91	-0.01623	R	SIVPSGASTGVHEALEMR	D			103.34	1	0	gi|00924	90.96	1	85.8015	131007_Sam_Standard_02_p.03532.03532.2	1839.871933[0.026723];1839.834717[0.063939];1839.904297[-0.005641];1839.922943[-0.024287];1839.991425[-0.092769];1839.995514[-0.096858];1839.987640[-0.088984];1839.973068[-0.074412];1839.867264[0.031392]	ALDNSHERPAAMLREM/;ARADEADQVNGQPAVAND/;TAFDALGAKAGDYYPPAL/;SIVYHLCVEWKTVTY/;AARLAEEKRIADEAAAR/;LASQQSGVPHHLILAQAA/;EAVRMALVNLSAVAAPAGT/;LWQPSAGKPQTVTVSEL/;ADLDLSLRNMTFSKDD/	12.380000;12.370000;8.270000;6.160000;4.470000;3.470000;3.280000;3.230000;3.180000	0.057810;0.057943;0.148936;0.242103;0.357273;0.449780;0.469894;0.475335;0.000000	0.010000;4.100000;2.110000;1.690000;1.000000;0.190000;0.050000;0.050000;NA	0.000000000802;0.000000000800;0.000000000311;0.000000000191;0.000000000130;0.000000000103;0.000000000099;0.000000000097;0.000000000096	0.000000;0.000000;0.000000;0.000000;0.000000;0.000000;0.000000;0.000000;0.000000
query8382	824.378	1646.74	2	1646.76	-0.020945	A	QDSFAAGWGVMVSHR	S			100.65	1	0	gi|00924	84.88	1	79.6303	131007_Sam_Standard_01_p.04289.04289.2	1646.838943[-0.097513];1646.778763[-0.037333];1646.805283[-0.063853];1646.819870[-0.078440];1646.823883[-0.082453];1646.803909[-0.062479];1646.779663[-0.038233];1646.790024[-0.048594];1646.837616[-0.096186]	SPHRAKRPWQGAQE/;QDQPDYLNAAVALET/;SSFGVAGARFASVAYTG/;FNHETRLMSGVTQK/;RMQGSGAPYPALWLT/;NFLEEEALIEVPGST/;MPPMYGQPGGLQGLTT/;QDYGRPPVTAIQDST/;SRSFKGGPQDKQALE/	15.770000;13.140000;12.260000;12.230000;9.190000;8.530000;8.400000;8.070000;7.640000	0.026485;0.048529;0.059429;0.059841;0.120504;0.140281;0.144544;0.155955;0.000000	2.630000;0.880000;0.030000;3.040000;0.660000;0.130000;0.330000;0.430000;NA	0.000000003251;0.000000001774;0.000000001449;0.000000001439;0.000000000714;0.000000000614;0.000000000596;0.000000000552;0.000000000500	0.000000;0.000000;0.000000;0.000000;0.000000;0.000000;0.000000;0.000000;0.000000
query8159	814.395	1626.78	2	1626.79	-0.01333	L	SYVDDEAFIRDVAK	V			93.88	1	0	gi|00489	83.33	1	76.5208	131007_Sam_Standard_03_p.04680.04680.2	1626.726929[0.048681];1626.777725[-0.002115];1626.749405[0.026205];1626.683182[0.092428];1626.830048[-0.054438];1626.734802[0.040808];1626.804398[-0.028788];1626.844620[-0.069010];1626.857666[-0.082056]	AEQMTMLEETFGIQ/;SYLTPEDLSQVFTQ/;SYVDNTRIGAMGICAG/;FCDGQDSADTLITNAG/;TFTPVMAARAQHAVQ/;DGPALPEPAFAPQNCT/;MAGSLKIGRYCMIGGA/;FIALFFAEHSLVFS/;EEGEQATSPRLLGLK/	10.550000;9.050000;8.960000;8.830000;7.980000;5.710000;5.440000;5.040000;4.550000	0.088105;0.124451;0.127057;0.130918;0.159221;0.268534;0.285759;0.313329;0.000000	1.500000;0.090000;0.130000;0.850000;2.270000;0.270000;0.400000;0.490000;NA	0.000000004645;0.000000003289;0.000000003221;0.000000003126;0.000000002570;0.000000001524;0.000000001432;0.000000001306;0.000000001167	0.000000;0.000000;0.000000;0.000000;0.000000;0.000000;0.000000;0.000000;0.000000
query14753	771.391	2311.15	3	2311.14	0.00927	K	ATDGGAHGVINVSVSEAAIEASTR	Y			86.95	1	0	gi|00330	82.2	1	73.7905	131007_Sam_Standard_01_p.03851.03851.3	2311.165558[-0.015877];2311.169601[-0.019920];2311.170898[-0.021217];2311.239822[-0.090141];2311.107590[0.042091];2311.133881[0.015800];2311.151810[-0.002129];2311.147781[0.001900];2311.155838[-0.006157]	DTHVERIEQLGSASLLAGLTSD/;AVSSDLGYLQVSGSQLKQDFLG/;PVHYAGAPADIDAIRAIGERYG/;KGKKIAMTWAYSPSYGKPLSV/;ISLGCTMILSNVSALEDEGGGVF/;KRTRGFDKCSDAESVDLTRQ/;DKALFGDLTDCADFAALLREK/;QCPLIQAPNSLLETGSREQVE/;PAWDAYMKAVLEGVPEQPLTP/	4.750000;4.730000;3.580000;3.510000;3.480000;3.240000;3.130000;2.890000;2.740000	0.334965;0.336512;0.438531;0.445656;0.448745;0.474242;0.486407;0.514044;0.000000	0.020000;1.150000;0.070000;0.030000;0.240000;0.110000;0.240000;0.150000;NA	0.000000006026;0.000000005998;0.000000004603;0.000000004529;0.000000004498;0.000000004256;0.000000004150;0.000000003926;0.000000003793	0.000000;0.000000;0.000000;0.000000;0.000000;0.000000;0.000000;0.000000;0.000000
query6621	740.4	1478.79	2	1478.79	-0.002039	K	LGEYGFQNALIVR	Y			103.63	1	0	gi|02769	81.85	1	78.4033	131007_Sam_Standard_02_p.04486.04486.2	1478.736511[0.049597];1478.725311[0.060797];1478.740524[0.045584];1478.754654[0.031454];1478.766571[0.019537];1478.740524[0.045584];1478.739868[0.046240];1478.787674[-0.001566];1478.765671[0.020437]	LADISGQQLDYRT/;LVSYQINDDGTVVG/;IWYGDKENIALGT/;GLESIKVMDLLMM/;IWCMSFILVLTGP/;LDAYSKLTTWNAP/;GESLALSSSKMDVR/;ISTICCLLIGYPLA/;SYDPEIFKILPAS/	21.780000;17.780000;14.430000;14.040000;13.330000;11.310000;10.720000;10.580000;10.480000	0.006637;0.016672;0.036058;0.039446;0.046452;0.073961;0.084723;0.087498;0.000000	4.000000;3.350000;0.390000;0.710000;2.020000;0.590000;0.140000;0.100000;NA	0.000000006531;0.000000002600;0.000000001202;0.000000001099;0.000000000933;0.000000000586;0.000000000512;0.000000000495;0.000000000484	0.000000;0.000000;0.000000;0.000000;0.000000;0.000000;0.000000;0.000000;0.000000
query5804	703.853	1405.69	2	1405.68	0.007878	L	GIDGGEGKEELFR	S			95.14	1	0	gi|00330	79.51	1	74.0698	131007_Sam_Standard_03_p.03670.03670.2	1405.731339[-0.039715];1405.680573[0.011051];1405.720139[-0.028515];1405.720154[-0.028530];1405.651382[0.040242];1405.760574[-0.068950];1405.691147[0.000477];1405.610977[0.080647];1405.760544[-0.068920]	TARAEGLFKEER/;GIDENTLMAMRR/;REGADASTVIQFL/;GLDFGSDSVRALAV/;VATEHEPGGLYAY/;GINPFLGYTLVGVG/;GLAAFSVLSCDNLP/;QDDGAEAIPGYDR/;LATFGGLKFLEPN/	15.630000;15.220000;10.540000;9.990000;9.750000;8.770000;8.360000;8.340000;7.900000	0.027353;0.030061;0.088308;0.100231;0.105925;0.132739;0.145881;0.146555;0.000000	0.410000;4.680000;0.550000;0.240000;0.980000;0.410000;0.020000;0.440000;NA	0.000000011194;0.000000010186;0.000000003467;0.000000003055;0.000000002891;0.000000002307;0.000000002099;0.000000002089;0.000000001888	0.000000;0.000000;0.000000;0.000000;0.000000;0.000000;0.000000;0.000000;0.000000
query7540	784.919	1567.82	2	1567.82	-0.000269	R	KLLSYVDDEAFIR	D			100.2	1	0	gi|00489	78.76	1	76.0489	131007_Sam_Standard_03_p.04051.04051.2	1567.814041[0.010275];1567.747818[0.076498];1567.818054[0.006262];1567.831787[-0.007471];1567.869507[-0.045191];1567.835861[-0.011545];1567.919830[-0.095514];1567.827957[-0.003641];1567.752045[0.072271]	QLLGDREMSPVPAR/;QPANHSTEVLSTIDG/;QLLHLMIHSLYSN/;KISIDTQNINHSAK/;QLLIGHYERRQR/;QIPDATPTGFVAPVR/;KLLSKNGVFKAHGVA/;QLIKNPLPTETMPS/;QLLLSGMSCASCVTR/	21.440000;13.700000;12.660000;12.020000;11.840000;11.390000;10.660000;10.470000;10.460000	0.007178;0.042658;0.054200;0.062806;0.065464;0.072611;0.085901;0.089743;0.000000	7.740000;1.040000;0.640000;0.180000;0.450000;0.730000;0.190000;0.010000;NA	0.000000013305;0.000000002239;0.000000001762;0.000000001521;0.000000001459;0.000000001315;0.000000001112;0.000000001064;0.000000001062	0.000000;0.000000;0.000000;0.000000;0.000000;0.000000;0.000000;0.000000;0.000000
query9520	878.479	1754.94	2	1754.94	0.001775	K	TAGIQIVADDLTVTNPK	R			94.48	1	0	gi|00924	75.37	1	70.0686	131007_Sam_Standard_03_p.04297.04297.2	1755.011490[-0.068278];1754.949936[-0.006724];1754.868652[0.074560];1754.883926[0.059286];1754.950806[-0.007594];1754.941406[0.001806];1754.854691[0.088521];1754.866119[0.077093];1754.938690[0.004522]	ATGIQLKKQRSQGNKV/;GGEARLNRSIDVRKNA/;VNEVLQDADLGILNDQ/;VDGAQIIGLWGDGVENL/;FFFAALGVRYLAGNIP/;PTGKSLVEGRDELLLE/;LQTGAEAQNAEERNKP/;AAKAEIEHLMNEVFGP/;AASIQEEQGGARALAKR/	19.110000;18.040000;17.260000;12.210000;11.610000;11.270000;10.850000;10.660000;9.760000	0.012274;0.015704;0.018793;0.060117;0.069024;0.074645;0.082224;0.085901;0.000000	1.070000;0.780000;5.050000;0.600000;0.340000;0.420000;0.190000;0.900000;NA	0.000000029040;0.000000022699;0.000000018967;0.000000005929;0.000000005164;0.000000004775;0.000000004335;0.000000004150;0.000000003373	0.000000;0.000000;0.000000;0.000000;0.000000;0.000000;0.000000;0.000000;0.000000
query5868	707.376	1412.74	2	1412.71	0.027943	K	WLTGPQLADLYH	S			90.76	1	0	gi|00924	75.12	1	68.9382	131007_Sam_Standard_02_p.04880.04880.2	1412.762344[-0.025554];1412.733322[0.003468];1412.672455[0.064335];1412.678314[0.058476];1412.723434[0.013356];1412.712189[0.024601];1412.752441[-0.015651];1412.696960[0.039830];1412.762344[-0.025554]	GTIIEGGDVNGRLI/;EPKNITLSCGAPAL/;FDYEQLAFQRP/;GEIVAEIDDAERP/;EGILNRCVYIPH/;PAMQALIEQIYH/;DALRARLVTHFD/;VIVPCGNIADIADN/;SVTLGVSARAQVEP/	15.640000;12.930000;12.830000;12.050000;11.780000;11.630000;11.190000;10.060000;8.870000	0.027290;0.050933;0.052119;0.062373;0.066374;0.068707;0.076033;0.098628;0.000000	2.710000;0.100000;0.780000;0.270000;0.150000;0.440000;1.130000;1.190000;NA	0.000000030761;0.000000016482;0.000000016106;0.000000013459;0.000000012647;0.000000012218;0.000000011041;0.000000008511;0.000000006471	0.000000;0.000000;0.000000;0.000000;0.000000;0.000000;0.000000;0.000000;0.000000
query10412	927.473	1852.93	2	1852.96	-0.026424	K	LLSYVDDEAFIRDVAK	V			89.67	1	0	gi|00489	73.96	1	70.1224	131007_Sam_Standard_03_p.04682.04682.2	1852.851257[0.079381];1852.989441[-0.058803];1852.972290[-0.041652];1852.898895[0.031743];1852.910110[0.020528];1852.877747[0.052891];1852.975677[-0.045039];1852.917511[0.013127];1853.027130[-0.096492]	FADKNDDISMEKELQA/;IVSRSGTLTYEAVKQTT/;IEYAVYAELTRNIWL/;LLSQTLLGNEGHMNTPE/;LLSEKAQAIQGDNLNCH/;LISEATNYVAADYMRH/;LLSTIPPGPACIYNNPAI/;QTKETYIAPMRVSMAQ/;LLPYLIHTDSNRQRK/	15.710000;10.340000;8.680000;8.260000;8.110000;7.970000;7.570000;7.480000;5.940000	0.026853;0.092470;0.135519;0.149279;0.154525;0.159588;0.174985;0.178649;0.000000	5.370000;1.660000;0.420000;0.150000;0.140000;0.400000;0.090000;1.540000;NA	0.000000040179;0.000000011668;0.000000007962;0.000000007228;0.000000006982;0.000000006761;0.000000006166;0.000000006039;0.000000004236	0.000000;0.000000;0.000000;0.000000;0.000000;0.000000;0.000000;0.000000;0.000000
query6185	720.871	1439.73	2	1439.73	-0.001872	K	LLSYVDDEAFIR	D			88.92	1	0	gi|00489	73.67	1	68.5473	131007_Sam_Standard_02_p.04404.04404.2	1439.664276[0.063482];1439.755463[-0.027705];1439.685394[0.042364];1439.685379[0.042379];1439.715225[0.012533];1439.761993[-0.034235];1439.755646[-0.027888];1439.693268[0.034490];1439.733002[-0.005244]	EALDFDPAFCLTV/;LIHLLESMQGGSR/;LLSFLECLTTEDG/;LISLDYDDTLMAA/;LIMMSVITNAYAN/;LLSVDPNNQSQII/;IICYFPQLSLML/;TPPLGPQDQPDYL/;LMAALLHDVIEDT/	15.250000;13.790000;11.990000;11.120000;6.870000;6.740000;6.590000;6.450000;6.250000	0.029854;0.041783;0.063241;0.077268;0.205589;0.211836;0.219280;0.226464;0.000000	1.460000;1.800000;0.870000;4.250000;0.130000;0.150000;0.140000;0.200000;NA	0.000000042954;0.000000030690;0.000000020277;0.000000016596;0.000000006237;0.000000006053;0.000000005848;0.000000005662;0.000000005408	0.000000;0.000000;0.000000;0.000000;0.000000;0.000000;0.000000;0.000000;0.000000
query5601	693.882	1385.75	2	1385.73	0.015188	R	ANGTTVLVGMPAGAK	C			85.15	1	0	gi|00330	71.75	1	64.4801	131007_Sam_Standard_02_p.03015.03015.2	1385.817017[-0.068141];1385.780640[-0.031764];1385.726273[0.022603];1385.715042[0.033834];1385.795227[-0.046351];1385.703812[0.045064];1385.762650[-0.013774];1385.689911[0.058965];1385.817657[-0.068781]	LAYVPSVIVDVIV/;DVETVVLVTIIW/;QNEERVSKIVGQ/;KGGSPEGTVKANLE/;NATVMNTVLVLLV/;KGGEIKSLDDIDP/;GKGSITEQLLNAR/;NDGRTIVSDGKPQ/;RMKQLVADGKKI/	13.400000;12.480000;12.190000;10.850000;10.480000;10.330000;9.700000;9.450000;9.180000	0.045709;0.056494;0.060395;0.082224;0.089536;0.092683;0.107152;0.113501;0.000000	0.920000;0.290000;1.340000;0.370000;0.150000;0.630000;0.250000;0.270000;NA	0.000000066834;0.000000054075;0.000000050582;0.000000037154;0.000000034119;0.000000032961;0.000000028510;0.000000026915;0.000000025293	0.000000;0.000000;0.000000;0.000000;0.000000;0.000000;0.000000;0.000000;0.000000
query5322	681.875	1361.73	2	1361.73	0.004537	S	GAAGGLGSLAVQYAK	A			107.58	1	0	gi|00330	70.67	1	70.5545	131007_Sam_Standard_03_p.03532.03532.2	1361.777893[-0.043055];1361.701309[0.033529];1361.672791[0.062047];1361.705139[0.029699];1361.744232[-0.009394];1361.755432[-0.020594];1361.676132[0.058706];1361.766663[-0.031825];1361.780594[-0.045756]	KANLSVAARSFKA/;RIEDMAYGLVPV/;AGANIDGKHYFGI/;QNRPLVDLEHAA/;VTLLKEVADFDI/;IEALQGEIKSFK/;QNAPGIAAMKAAGY/;QKRAAELLGLTY/;SILLLEKGITFE/	36.910000;14.630000;12.860000;12.260000;12.130000;12.060000;11.300000;10.280000;10.240000	0.000204;0.034435;0.051761;0.059429;0.061235;0.062230;0.074131;0.093756;0.000000	22.280000;1.770000;0.600000;0.130000;0.070000;0.760000;1.020000;0.040000;NA	0.000000085704;0.000000000507;0.000000000337;0.000000000294;0.000000000285;0.000000000281;0.000000000236;0.000000000186;0.000000000185	0.000000;0.000000;0.000000;0.000000;0.000000;0.000000;0.000000;0.000000;0.000000
query8053	809.93	1617.85	2	1617.84	0.009939	R	VLGIDGGEGKEELFR	S			95.89	1	0	gi|00330	70.4	1	68.428	131007_Sam_Standard_02_p.03710.03710.2	1617.777405[0.068761];1617.854874[-0.008708];1617.756256[0.089910];1617.807266[0.038900];1617.888550[-0.042384];1617.909012[-0.062846];1617.843597[0.002569];1617.822327[0.023839];1617.777344[0.068822]	DPGIDEILDDTGVFI/;VLGDLNRFTLTGCLP/;DPGVVSVSEIYQYY/;VLGDLGFLMGGTPNEV/;RILRTHAAMSVLGHG/;VILTALIPDDAKVGGH/;VLGIPKPKTMEENY/;ALLTVGIDDTHNRHG/;IVGIPEEEQELYEA/	25.490000;18.610000;14.500000;14.120000;12.740000;12.550000;12.330000;11.060000;10.080000	0.002825;0.013772;0.035481;0.038726;0.053211;0.055590;0.058479;0.078343;0.000000	6.880000;4.110000;0.380000;1.380000;0.190000;0.220000;1.270000;0.980000;NA	0.000000091201;0.000000018707;0.000000007261;0.000000006653;0.000000004842;0.000000004634;0.000000004406;0.000000003289;0.000000002624	0.000000;0.000000;0.000000;0.000000;0.000000;0.000000;0.000000;0.000000;0.000000
query7040	760.394	1518.77	2	1518.77	0.006093	V	LGIDGGEGKEELFR	S			87.59	1	0	gi|00330	69.4	1	63.6471	131007_Sam_Standard_01_p.03724.03724.2	1518.764633[0.009267];1518.771835[0.002065];1518.734787[0.039113];1518.792984[-0.019084];1518.818100[-0.044200];1518.815414[-0.041514];1518.815445[-0.041545];1518.804214[-0.030314];1518.797668[-0.023768]	LGIDENTLMAMRR/;LAVDWGLTFLAENA/;LLGDDERINATMTA/;LGIDPQSKTLVFSD/;LGAITEEYLLDLGI/;ILGDREKRSVFAE/;VIADGGTRNVAFTAK/;IGLDFGSDSVRALAV/;AVLGDLDMRNIRF/	18.190000;16.150000;15.760000;13.920000;13.310000;11.680000;11.670000;11.600000;11.190000	0.015171;0.024266;0.026546;0.040551;0.046666;0.067920;0.068077;0.069183;0.000000	2.040000;0.390000;1.840000;0.610000;1.630000;0.010000;0.070000;0.410000;NA	0.000000114815;0.000000071779;0.000000065614;0.000000042954;0.000000037325;0.000000025645;0.000000025586;0.000000025177;0.000000022909	0.000000;0.000000;0.000000;0.000000;0.000000;0.000000;0.000000;0.000000;0.000000
query7309	775.895	1549.78	2	1549.76	0.013479	R	IGEEYISDLDQLR	K			90.71	1	0	gi|00489	68.41	1	66.0851	131007_Sam_Standard_01_p.04456.04456.2	1549.835144[-0.059290];1549.763702[0.012152];1549.803482[-0.027628];1549.810013[-0.034159];1549.798752[-0.022898];1549.766418[0.009436];1549.727509[0.048345];1549.778503[-0.002649];1549.708908[0.066946]	IADYELSALLVTRS/;WLYELGNRETNR/;TVGMALADSLNRRF/;IGSYRSQDGAVTALI/;DAIEASGLEYTILR/;WASADLEVFTELIG/;WLEYPNMLWLAD/;LMFLSLPQWMER/;LAQEFGNFLDFYS/	22.300000;14.130000;13.530000;12.390000;11.090000;10.500000;10.450000;9.990000;9.700000	0.005888;0.038637;0.044361;0.057677;0.077804;0.089125;0.090157;0.100231;0.000000	8.170000;0.600000;1.140000;1.300000;0.590000;0.050000;0.460000;0.290000;NA	0.000000144211;0.000000021979;0.000000019143;0.000000014723;0.000000010914;0.000000009528;0.000000009419;0.000000008472;0.000000007925	0.000001;0.000000;0.000000;0.000000;0.000000;0.000000;0.000000;0.000000;0.000000
query5910	708.867	1415.72	2	1415.71	0.004216	R	GNPTVEVELTTEK	G			72.74	1	0	gi|00924	66.02	0.999999	59.8269	131007_Sam_Standard_02_p.02851.02851.2	1415.679337[0.039265];1415.686523[0.032079];1415.693222[0.025380];1415.707855[0.010747];1415.723114[-0.004512];1415.798386[-0.079784];1415.795853[-0.077251];1415.761993[-0.043391];1415.799713[-0.081111]	GNKQVAVSGWQEN/;NGAQARRDNLSSAG/;SLYVKENNLSSY/;LGAQVTEGLAQQAM/;NVRVMPESIPAGF/;LGSLVGAGIGALSSSK/;IGPNLKKPYMKQ/;SVGAIAVKEKGDDK/;EIKNIVRHGIHT/	6.720000;4.110000;3.700000;3.430000;3.040000;2.630000;1.180000;1.160000;1.040000	0.212814;0.388150;0.426580;0.453942;0.496592;0.545758;0.762079;0.765597;0.000000	2.610000;0.410000;0.270000;0.390000;0.410000;1.450000;0.020000;0.120000;NA	0.000000250034;0.000000137088;0.000000124738;0.000000117219;0.000000107152;0.000000097499;0.000000069823;0.000000069502;0.000000067608	0.000001;0.000001;0.000001;0.000001;0.000000;0.000000;0.000000;0.000000;0.000000
query9621	589.334	1764.98	3	1764.96	0.016623	K	VHINPNSLFDVQVKR	I			77.11	1	0	gi|00489	65.87	0.999998	57.8981	131007_Sam_Standard_02_p.03705.03705.3	1764.925751[0.054373];1764.886871[0.093253];1764.982086[-0.001962];1765.042969[-0.062845];1764.952240[0.027884];1764.919205[0.060919];1765.009964[-0.029840];1764.915878[0.064246];1764.977432[0.002692]	TILYVTALQSEKDER/;FWLLDSEKGEARCIV/;HLRNQILWKNILMS/;FAISFVLLIGLLEIFA/;RPAKYKFIDVNGETK/;CALSYKKPIRDEQKS/;LFVVATMLEIGSLFLI/;QTALFQAFDTLNLQR/;FAVVLSDLTISRGQLF/	11.240000;11.220000;10.580000;10.020000;9.500000;9.410000;8.080000;7.820000;7.210000	0.075162;0.075509;0.087498;0.099541;0.112202;0.114551;0.155597;0.165196;0.000000	0.020000;0.640000;0.560000;0.520000;0.090000;1.330000;0.260000;0.610000;NA	0.000000258821;0.000000257632;0.000000222331;0.000000195434;0.000000173380;0.000000169824;0.000000125026;0.000000117760;0.000000102329	0.000001;0.000001;0.000001;0.000001;0.000001;0.000001;0.000001;0.000001;0.000000
query5718	700.348	1398.68	2	1398.69	-0.004589	K	TVMENFVAFVDK	C			76.78	1	0	gi|02769	64.83	0.999998	58.038	131007_Sam_Standard_01_p.05361.05361.2	1398.755417[-0.074657];1398.689163[-0.008403];1398.677948[0.002812];1398.662689[0.018071];1398.739471[-0.058711];1398.724213[-0.043453];1398.735428[-0.054668];1398.652313[0.028447];1398.612579[0.068181]	ISRFMTRFVSR/;TVSYQVANAQYR/;ISPWPGAATGSGGEI/;SISGSHVAIDDIEG/;LSGSLSYIFGKLD/;SLPNLDVAEELTV/;EALVLKSDQAPASA/;LMDTMNDAFTKL/;SATMDESVFAVGW/	11.950000;9.070000;9.000000;8.950000;8.730000;8.680000;8.570000;8.310000;8.130000	0.063826;0.123880;0.125893;0.127350;0.133968;0.135519;0.138995;0.147571;0.000000	2.880000;0.070000;0.050000;0.220000;0.050000;0.110000;0.260000;0.180000;NA	0.000000328851;0.000000169434;0.000000166724;0.000000164816;0.000000156675;0.000000154881;0.000000151008;0.000000142233;0.000000136458	0.000001;0.000001;0.000001;0.000001;0.000001;0.000001;0.000001;0.000001;0.000001
query4426	643.349	1284.68	2	1284.69	-0.008357	Q	IVADDLTVTNPK	R			84.21	1	0	gi|00924	61.52	0.999998	56.4896	131007_Sam_Standard_01_p.02647.02647.2	1284.590759[0.093419];1284.728897[-0.044719];1284.728897[-0.044719];1284.674744[0.009434];1284.762772[-0.078594];1284.733612[-0.049434];1284.714966[-0.030788];1284.744171[-0.059993];1284.707779[-0.023601]	PDADDLMAEVIP/;IVAEVSEVAKGAL/;LLTADLISLNVN/;LASEICLSKQPP/;AVMVALILWAKA/;VLANAQMVVRKG/;LLGDEGIERRK/;LVAFSTHAILTI/;LVTEAIVQHLY/	22.690000;21.790000;21.420000;13.890000;13.530000;13.120000;12.470000;11.950000;11.840000	0.005383;0.006622;0.007211;0.040832;0.044361;0.048753;0.056624;0.063826;0.000000	0.900000;0.370000;7.530000;0.360000;0.410000;0.650000;0.520000;0.110000;NA	0.000000704691;0.000000572795;0.000000526016;0.000000092896;0.000000085506;0.000000077803;0.000000066988;0.000000059429;0.000000057943	0.000003;0.000002;0.000002;0.000000;0.000000;0.000000;0.000000;0.000000;0.000000
query5275	679.385	1356.76	2	1356.76	-0.006159	R	GLAGVENVTELKK	N			83.85	1	0	gi|00489	60.26	0.999998	56.3043	131007_Sam_Standard_02_p.02704.02704.2	1356.772507[-0.017405];1356.783737[-0.028635];1356.797623[-0.042521];1356.724915[0.030187];1356.732285[0.022817];1356.808868[-0.053766];1356.724899[0.030203];1356.761261[-0.006159];1356.728912[0.026190]	LGQVEKGSTVIRA/;AARVQLTTTRLQ/;AGLKTELEQKKI/;LGAGVGSSVLDVVNA/;KLGVDPLTCVALE/;VAKVEIRKEGKT/;AVGVATLAVVAANDS/;GLAGAKDALQLITS/;AVADDIKLVDWL/	23.590000;21.310000;18.750000;15.330000;13.760000;13.700000;12.710000;12.540000;10.640000	0.004375;0.007396;0.013335;0.029309;0.042073;0.042658;0.053580;0.055719;0.000000	2.280000;2.560000;3.420000;1.570000;0.060000;0.990000;0.170000;1.900000;NA	0.000000941887;0.000000557184;0.000000309029;0.000000140604;0.000000097949;0.000000096605;0.000000076913;0.000000073960;0.000000047753	0.000004;0.000002;0.000001;0.000001;0.000000;0.000000;0.000000;0.000000;0.000000
query3912	626.339	1250.66	2	1250.66	0.002018	K	SISIVGSYVGNR	A			77.32	1	0	gi|00330	58.68	0.999992	51.1683	131007_Sam_Standard_03_p.03286.03286.2	1250.650635[0.013279];1250.636749[0.027165];1250.618515[0.045399];1250.745880[-0.081966];1250.723434[-0.059520];1250.713531[-0.049617];1250.673340[-0.009426];1250.658066[0.005848];1250.673141[-0.009227]	EASGLEYTILR/;ATLDVRGGYRSG/;ATDIVVMRIMC/;RLIGPGEQLRL/;VSVPNLIGALPTA/;SNKAVAVFFLR/;PATLVFMGFVLG/;SLSMVEGGVLLF/;RIPDVVQRDPG/	18.640000;18.500000;18.430000;16.870000;16.660000;14.510000;14.190000;13.990000;13.830000	0.013677;0.014125;0.014355;0.020559;0.021577;0.035400;0.038107;0.039902;0.000000	0.140000;0.070000;1.560000;0.210000;2.150000;0.320000;0.200000;0.160000;NA	0.000001355179;0.000001312190;0.000001291209;0.000000901564;0.000000859007;0.000000523596;0.000000486403;0.000000464512;0.000000447710	0.000006;0.000006;0.000006;0.000004;0.000004;0.000002;0.000002;0.000002;0.000002
query5857	706.919	1411.82	2	1411.81	0.007924	K	LGANAILGVSLAASR	A			81.97	1	0	gi|00924	58.39	0.999995	53.0204	131007_Sam_Standard_01_p.04486.04486.2	1411.807480[0.015126];1411.757217[0.065389];1411.778290[0.044316];1411.858459[-0.035853];1411.785690[0.036916];1411.755859[0.066747];1411.785690[0.036916];1411.864990[-0.042384];1411.851059[-0.028453]	ELIALLHKVEFT/;QLGGIALVVPDHHG/;SPELLLRKDGER/;KIKGLLMSAQPKV/;KLQGLLASCQPAAI/;LELAIVGLIDGGGEG/;NLQAILVKNLPCS/;TVLLILGSELIKN/;GKLGLALSKELRQ/	23.580000;20.430000;20.010000;19.640000;19.140000;17.720000;16.250000;15.820000;15.170000	0.004385;0.009057;0.009977;0.010864;0.012190;0.016904;0.023714;0.026182;0.000000	3.150000;0.420000;0.370000;0.500000;1.420000;1.470000;0.430000;0.650000;NA	0.000001448765;0.000000701452;0.000000636792;0.000000584787;0.000000521192;0.000000375836;0.000000267915;0.000000242660;0.000000208929	0.000006;0.000003;0.000003;0.000003;0.000002;0.000002;0.000001;0.000001;0.000001
query5224	678.349	1354.68	2	1354.67	0.016957	R	DYYFALAHTVR	D			72.4	1	0	gi|00489	58.12	0.999993	51.7302	131007_Sam_Standard_02_p.03804.03804.2	1354.672821[0.011113];1354.713242[-0.029308];1354.713272[-0.029338];1354.764236[-0.080302];1354.688095[-0.004161];1354.728500[-0.044566];1354.600098[0.083836];1354.678406[0.005528];1354.724503[-0.040569]	EERPAAIEIDNV/;ADLPWIAESIQL/;AVDISPLAVDWGL/;NVQIGALANVIIM/;DYYGKLDLVRN/;YYGKAPLVKGYP/;ASDTHAVDVNPTE/;GCLLWPPFYFL/;FVQYGTALTISR/	14.280000;13.840000;12.690000;10.550000;10.010000;8.580000;8.360000;7.740000;7.570000	0.037325;0.041305;0.053827;0.088105;0.099770;0.138676;0.145881;0.168267;0.000000	0.440000;1.150000;2.140000;0.540000;1.430000;0.220000;0.620000;0.170000;NA	0.000001541690;0.000001393147;0.000001069048;0.000000653126;0.000000576763;0.000000414951;0.000000394455;0.000000341977;0.000000328849	0.000007;0.000006;0.000005;0.000003;0.000003;0.000002;0.000002;0.000001;0.000001
query7202	769.378	1536.74	2	1536.75	-0.009089	R	FKVFADYEEYVK	C			77.66	1	0	gi|00489	57.9	0.999996	53.9306	131007_Sam_Standard_02_p.04059.04059.2	1536.680618[0.060324];1536.730759[0.010183];1536.739319[0.001623];1536.739487[0.001455];1536.705612[0.035330];1536.808899[-0.067957];1536.674103[0.066839];1536.720856[0.020086];1536.730759[0.010183]	LSIQYCYYEVEAG/;QVELEEFSGSGVKE/;QADSQRPAHGDVRT/;QFVAWCREEASVI/;QDAATKNYVDGVAEG/;FKFVAAEDWVAVR/;GMSDAMIAWAEWLG/;EQHFSEEIYVTR/;EVVDDKEGKYVQE/	19.760000;15.430000;15.120000;11.680000;11.310000;11.020000;10.530000;10.370000;10.370000	0.010568;0.028642;0.030761;0.067920;0.073961;0.079068;0.088512;0.091833;0.000000	4.330000;0.310000;3.440000;0.370000;0.290000;0.490000;0.160000;0.000000;NA	0.000001621804;0.000000598409;0.000000557183;0.000000252347;0.000000231739;0.000000216770;0.000000193641;0.000000186637;0.000000186637	0.000007;0.000003;0.000002;0.000001;0.000001;0.000001;0.000001;0.000001;0.000001
query3539	615.348	1228.68	2	1228.67	0.015064	R	GLAGVENVTELK	K			80.89	1	0	gi|00489	57.81	0.999995	52.6364	131007_Sam_Standard_03_p.03280.03280.2	1228.660431[0.020939];1228.594849[0.086521];1228.713943[-0.032573];1228.725159[-0.043789];1228.677551[0.003819];1228.729187[-0.047817];1228.666306[0.015064];1228.717941[-0.036571];1228.666306[0.015064]	VAQVEWKIAW/;AARAIGYEGNAH/;AAVVGRSVGTSLL/;AARVQLTTTRL/;LGAGTSGRLGILD/;LGPFTGRLAGKL/;AKSVIDDLAGLQ/;AAKVLFEPGGLK/;GKLVENEIVTGA/	23.080000;20.510000;19.480000;19.380000;17.430000;15.580000;14.770000;14.630000;14.360000	0.004920;0.008892;0.011272;0.011535;0.018072;0.027669;0.033343;0.034435;0.000000	2.570000;1.030000;0.100000;1.950000;1.850000;0.810000;0.140000;0.270000;NA	0.000001655761;0.000000916215;0.000000722766;0.000000706314;0.000000450814;0.000000294441;0.000000244342;0.000000236591;0.000000222330	0.000007;0.000004;0.000003;0.000003;0.000002;0.000001;0.000001;0.000001;0.000001
query5484	688.837	1375.66	2	1375.68	-0.017696	L	DWDKAWEVTVK	T			74.57	1	0	gi|00489	56.71	0.999993	51.261	131007_Sam_Standard_03_p.04479.04479.2	1375.655411[0.004109];1375.701706[-0.042186];1375.724808[-0.065288];1375.734726[-0.075206];1375.719498[-0.059978];1375.730698[-0.071178];1375.691803[-0.032283];1375.676559[-0.017039];1375.757172[-0.097652]	QDGMLWAESRAL/;GTSLSGLDAAMAVAI/;KPYVKADYKHQ/;KNEIIFGDITVQ/;TSLDTPVSKTTGGL/;ASRDDAITISTKV/;RFLQASVIEPNC/;TVTENCNDILRV/;KAFSERLRSSVP/	17.860000;15.320000;15.080000;12.270000;11.880000;11.760000;11.720000;11.040000;10.810000	0.016368;0.029376;0.031046;0.059293;0.064863;0.066681;0.067298;0.078705;0.000000	2.540000;0.240000;2.810000;0.390000;0.120000;0.040000;0.680000;0.230000;NA	0.000002133029;0.000001188493;0.000001124597;0.000000588839;0.000000538266;0.000000523597;0.000000518796;0.000000443605;0.000000420723	0.000009;0.000005;0.000005;0.000003;0.000002;0.000002;0.000002;0.000002;0.000002
query7237	770.881	1539.75	2	1539.76	-0.008646	S	YVDDEAFIRDVAK	V			67.23	1	0	gi|00489	56.63	0.99999	49.7929	131007_Sam_Standard_03_p.04687.04687.2	1539.738968[0.009298];1539.717377[0.030889];1539.723892[0.024374];1539.694885[0.053381];1539.754425[-0.006159];1539.696701[0.051565];1539.752869[-0.004603];1539.709244[0.039022];1539.710175[0.038091]	RGGSHSGNVAASELAQ/;YVDNTRIGAMGICAG/;YAQIGVESAVMSASQ/;MYNGINELIDDLM/;YVMVFSDWRQLP/;GHWEEWRDRAAQ/;KAAAAGASGYSITSATN/;YSELEEEWKAEK/;FLPDIYVPCDQCK/	10.600000;10.310000;9.340000;7.240000;6.610000;6.600000;6.250000;5.120000;4.310000	0.087096;0.093111;0.116413;0.188799;0.218273;0.218776;0.237137;0.307610;0.000000	0.290000;0.970000;2.100000;0.630000;0.010000;0.350000;1.130000;0.810000;NA	0.000002172678;0.000002032336;0.000001625532;0.000001002295;0.000000866953;0.000000864959;0.000000797986;0.000000615170;0.000000510500	0.000009;0.000009;0.000007;0.000004;0.000004;0.000004;0.000003;0.000003;0.000002
query4673	653.368	1304.72	2	1304.71	0.012578	K	HLVDEPQNLIK	Q			71.64	1	0	gi|02769	56	0.999992	50.9962	131007_Sam_Standard_01_p.02786.02786.2	1304.672424[0.048986];1304.781616[-0.060206];1304.632248[0.089162];1304.708847[0.012563];1304.628860[0.092550];1304.702301[0.019109];1304.724091[-0.002681];1304.708847[0.012563];1304.767700[-0.046290]	GEYLRAENILQ/;PKGITPTTHIIK/;TPTPAPFETLTM/;TRVAYIDGGILQ/;YSVDQAFISLY/;AFLCRDIARLQ/;LHLAPWQSILQ/;HIAGEAGIPQTVI/;IHVDQVVALRR/	15.640000;13.050000;11.310000;9.840000;9.410000;9.400000;8.720000;7.500000;7.390000	0.027290;0.049545;0.073961;0.103753;0.114551;0.114815;0.134276;0.177828;0.000000	2.590000;1.740000;1.470000;0.430000;0.010000;0.680000;1.220000;0.110000;NA	0.000002511866;0.000001383555;0.000000926822;0.000000660688;0.000000598407;0.000000597031;0.000000510501;0.000000385475;0.000000375834	0.000011;0.000006;0.000004;0.000003;0.000003;0.000003;0.000002;0.000002;0.000002
query10915	630.682	1889.02	3	1889	0.022393	K	LITAIGDVVNHDPVVGDR	L			57.41	1	0	gi|00489	56	0.999995	53.3348	131007_Sam_Standard_03_p.03939.03939.3	1888.927902[0.095193];1889.037048[-0.013953]	LLGNLNGTLGPYDGTRND/;LTIINRADVLPLDSNHV/	1.410000;0.690000	0.722770;0.674528	0.720000;NA	0.000002511875;0.000002128129	0.000011;0.000009
query5146	674.876	1347.74	2	1347.73	0.008841	V	VGLSTLPEIYEK	M			74.01	1	0	gi|00330	55.9	0.99999	49.9048	131007_Sam_Standard_03_p.04049.04049.2	1347.703430[0.033972];1347.744034[-0.006632];1347.664352[0.073050];1347.714645[0.022757];1347.751038[-0.013636];1347.746994[-0.009592];1347.653290[0.084112];1347.645279[0.092123];1347.649277[0.088125]	VAGETLINYVVNG/;RLMGLILVMMAT/;RLSQDVDHKHN/;VKTELPGRTNAY/;INHADKVITLQP/;ATAKKASSTQSRL/;PEMVIAHIFEY/;RMGVSTSGDTVAPA/;ENITIHFDMTK/	18.110000;16.660000;16.000000;15.200000;13.190000;11.450000;11.140000;11.110000;11.020000	0.015453;0.021577;0.025119;0.030200;0.047973;0.071614;0.076913;0.077446;0.000000	1.450000;0.660000;0.800000;2.010000;1.740000;0.310000;0.030000;0.090000;NA	0.000002570370;0.000001840753;0.000001581232;0.000001315211;0.000000827934;0.000000554620;0.000000516411;0.000000512856;0.000000502337	0.000011;0.000008;0.000007;0.000006;0.000004;0.000002;0.000002;0.000002;0.000002
query5263	679.324	1356.63	2	1356.62	0.013021	A	VFAGENFHHGDK	L			72.36	1	0	gi|00924	55.31	0.999994	52.2807	131007_Sam_Standard_01_p.03277.03277.2	1356.635025[-0.000895];1356.546967[0.087163];1356.631882[0.002248];1356.682190[-0.048060];1356.617264[0.016866];1356.583389[0.050741];1356.605362[0.028768];1356.703735[-0.069605];1356.634995[-0.000865]	VFANWFSDATSL/;FAEDIYDEQNN/;VFASGTWCRMTV/;VFAVVMFVDMIS/;VFQHPLYTYSC/;FAVGEEDQFSTAG/;MSEHPVDLMAID/;AFLEQHKEKLD/;VFSLSWYNEAAA/	17.050000;9.730000;9.560000;9.560000;7.420000;7.030000;6.640000;6.580000;5.960000	0.019724;0.106414;0.110662;0.110662;0.181134;0.198153;0.216770;0.219786;0.000000	7.320000;0.170000;0.000000;2.140000;0.390000;0.390000;0.060000;0.620000;NA	0.000002944404;0.000000545755;0.000000524804;0.000000524804;0.000000320625;0.000000293088;0.000000267915;0.000000264239;0.000000229085	0.000013;0.000002;0.000002;0.000002;0.000001;0.000001;0.000001;0.000001;0.000001
query8329	820.477	1638.94	2	1638.93	0.008337	R	KVPQVSTPTLVEVSR	S			69.03	1	0	gi|02769	55.16	0.999988	49.3448	131007_Sam_Standard_03_p.03103.03103.2	1638.868896[0.069922];1638.857697[0.081121];1638.861679[0.077139];1638.989273[-0.050455];1638.956955[-0.018137];1638.943024[-0.004206];1638.966827[-0.028009];1638.877640[0.061178];1638.970871[-0.032053]	NLPKVGNEVRNAIES/;QPNLLTGLNTLGGNLD/;QVDEALELYKRYL/;KPVSAAKRRGLLKSE/;KVALTIGRLVQAGAWG/;VQPGARVRWSKISR/;NLPRGTIKATLLIET/;QPVRARQCWAQLIA/;GGILATLPSGWIIKLT/	13.870000;12.980000;10.050000;9.560000;8.960000;7.920000;7.590000;7.150000;6.650000	0.041020;0.050350;0.098855;0.110662;0.127057;0.161436;0.174181;0.192752;0.000000	0.890000;2.930000;0.490000;0.600000;1.040000;0.330000;0.440000;0.500000;NA	0.000003047860;0.000002483104;0.000001264722;0.000001129783;0.000000984000;0.000000774453;0.000000717786;0.000000648627;0.000000578089	0.000013;0.000011;0.000005;0.000005;0.000004;0.000003;0.000003;0.000003;0.000003
query3777	623.331	1244.65	2	1244.65	-0.002436	N	PTVEVELTTEK	G			77.8	1	0	gi|00924	54.34	0.999993	51.3111	131007_Sam_Standard_02_p.02854.02854.2	1244.577225[0.070333];1244.712860[-0.065302];1244.701614[-0.054056];1244.672470[-0.024912];1244.643448[0.004110];1244.628860[0.018698];1244.643478[0.004080];1244.640060[0.007498];1244.577194[0.070364]	IPSVEEIDTQD/;PTVETKAFPKK/;PLSEVLPSIYK/;VVAAGKNGATTVAS/;SLPEDLRMAIT/;PTPTEAGFELLA/;TPVVECTDLLR/;PEAEEALIAFR/;PSLEISNEEID/	23.460000;18.960000;18.540000;15.040000;10.450000;9.330000;9.100000;8.410000;8.410000	0.004508;0.012706;0.013996;0.031333;0.090157;0.116681;0.123027;0.144212;0.000000	4.500000;0.420000;3.500000;4.590000;1.120000;0.230000;0.690000;0.000000;NA	0.000003681263;0.000001306161;0.000001185760;0.000000529660;0.000000184076;0.000000142232;0.000000134895;0.000000115079;0.000000115079	0.000016;0.000006;0.000005;0.000002;0.000001;0.000001;0.000001;0.000000;0.000000
query4741	656.842	1311.67	2	1311.67	-0.002406	R	SIGGEVFIDFTK	E			66.76	1	0	gi|00330	54.2	0.999981	47.1832	131007_Sam_Standard_02_p.04857.04857.2	1311.674423[-0.005747];1311.630676[0.038000];1311.598297[0.070379];1311.714645[-0.045969];1311.751038[-0.082362];1311.685654[-0.016978];1311.660492[0.008184];1311.634705[0.033971];1311.583893[0.084783]	EAGSVLPMEPAVL/;DGAAPLPTDQAGVT/;VEAENFLFTDQ/;ISGEVLRNAISPG/;TVVDKRAEVAPK/;EKSSGAVMFKKT/;AENMKKNPQVGP/;SLGDDVIFATQF/;GEKPMEMAYVGT/	12.560000;12.420000;11.050000;10.650000;9.460000;7.760000;7.590000;7.300000;6.960000	0.055463;0.057280;0.078524;0.086099;0.113240;0.167494;0.174181;0.186209;0.000000	0.140000;1.370000;0.400000;1.190000;1.700000;0.170000;0.290000;0.340000;NA	0.000003801821;0.000003681219;0.000002685293;0.000002449016;0.000001862052;0.000001258901;0.000001210575;0.000001132379;0.000001047109	0.000017;0.000016;0.000012;0.000011;0.000008;0.000005;0.000005;0.000005;0.000005
query8797	839.932	1677.85	2	1677.86	-0.008356	R	IGEEYISDLDQLRK	L			67.52	1	0	gi|00489	54.06	0.999982	47.5645	131007_Sam_Standard_01_p.03956.03956.2	1677.791977[0.056997];1677.763458[0.085516];1677.857330[-0.008356];1677.795822[0.053152];1677.852158[-0.003184];1677.930145[-0.081171];1677.934128[-0.085154];1677.799164[0.049810];1677.767456[0.081518]	GEELETLCNAGIPFSV/;WLETDSNKDSWQGL/;GEEYISDLDQLRKL/;NEGQYLTGTVGPERSA/;DARLHHIMLDIHHA/;VSVQKVADFLAVSKST/;EIGTILKAFNYPISL/;NLSNATNQMIEGTAKS/;VSEIYQYYKEHGY/	13.460000;12.890000;12.020000;11.070000;8.030000;8.030000;7.610000;7.300000;6.800000	0.045082;0.051404;0.062806;0.078163;0.157398;0.157398;0.173380;0.186209;0.000000	0.570000;0.870000;0.950000;3.040000;0.000000;0.420000;0.310000;0.500000;NA	0.000003926381;0.000003443439;0.000002818334;0.000002264605;0.000001124585;0.000001124585;0.000001020922;0.000000950588;0.000000847213	0.000017;0.000015;0.000012;0.000010;0.000005;0.000005;0.000004;0.000004;0.000004
query5532	690.37	1378.73	2	1378.71	0.016225	E	EYISDLDQLRK	L			74.72	1	0	gi|00489	53.51	0.99999	49.9938	131007_Sam_Standard_02_p.03944.03944.2	1378.781967[-0.056529];1378.688095[0.037343];1378.749634[-0.024196];1378.684067[0.041371];1378.716644[0.008794];1378.713242[0.012196];1378.678192[0.047246];1378.639816[0.085622];1378.801300[-0.075862]	EYLKGDKKIKAS/;EYLSNGKVVWAN/;EYNLLVIFIQQ/;EYLRRLDDAATG/;TMEFVDIAGLVKG/;EYLQNLVPFKE/;QYNKAFSAHWK/;EATEKSMSQIQGA/;VLFVSILWFKQ/	21.210000;16.470000;14.620000;13.420000;13.050000;12.500000;11.080000;10.240000;9.090000	0.007568;0.022542;0.034514;0.045499;0.049545;0.056234;0.077983;0.094624;0.000000	4.740000;1.850000;1.200000;0.370000;0.550000;1.420000;0.840000;1.150000;NA	0.000004456518;0.000001496221;0.000000977227;0.000000741303;0.000000680763;0.000000599785;0.000000432509;0.000000356448;0.000000273524	0.000019;0.000006;0.000004;0.000003;0.000003;0.000003;0.000002;0.000002;0.000001
query8904	563.975	1688.9	3	1688.88	0.025673	K	ARPEFTLPVHFYGR	V			62.62	1	0	gi|00489	53.39	0.999971	45.4005	131007_Sam_Standard_03_p.04115.04115.3	1688.874695[0.029686];1688.866821[0.037560];1688.811340[0.093041];1688.841019[0.063362];1688.827042[0.077339];1688.827042[0.077339];1688.842316[0.062065];1688.876724[0.027657];1688.876694[0.027687]	LPFLAHGGSHSRSAGPV/;IVHALGANVHASCAIDV/;IPMGCVLTLPATGSESN/;PSFSLWPAGQPTTTVT/;GNYRDRILTYYQQ/;AVQATGFEAYYRASR/;WPNGLYGSHLAVYGR/;VVKAAGGTLDVAATAAACT/;ADELLLKVENTTMGR/	9.230000;8.930000;8.650000;8.150000;7.610000;7.360000;6.090000;6.040000;5.280000	0.119399;0.127938;0.136458;0.153109;0.173380;0.183654;0.246037;0.248886;0.000000	0.300000;0.280000;0.500000;0.540000;0.250000;1.270000;0.050000;0.760000;NA	0.000004581287;0.000004275506;0.000004008552;0.000003572625;0.000003154914;0.000002978431;0.000002223246;0.000002197796;0.000001844962	0.000020;0.000019;0.000017;0.000016;0.000014;0.000013;0.000010;0.000010;0.000008
query15523	814.382	2440.12	3	2440.13	-0.00454	R	IEEELGDNAVFAGENFHHGDKL	X			55.13	1	0	gi|00924	52.68	0.999995	52.68	131007_Sam_Standard_01_p.03711.03711.3	2440.063477[0.061484]	AVSNGKDMRQADDCTTEWEALT/	2.45	0.058749	NA	5.39508e-06	2.3e-05
query2559	559.294	1116.57	2	1116.56	0.016103	R	VAAAFPGDVDR	L			77.95	1	0	gi|00489	52.67	0.999986	48.4207	131007_Sam_Standard_03_p.02553.02553.2	1116.584869[-0.012385];1116.592758[-0.020274];1116.592743[-0.020259];1116.529907[0.042577];1116.581497[-0.009013];1116.523361[0.049123];1116.530762[0.041722];1116.581528[-0.009044];1116.639038[-0.066554]	VASCSLPAEIK/;AAAVFGPQKGAT/;GALAFEPSLGR/;GLAVTDPDQTT/;KIAFPNDEAL/;QPSLMGDDVR/;INTMPGTPMVG/;GIAAEITTWGV/;VALVSSTLALSG/	25.280000;20.540000;20.270000;19.150000;18.570000;18.200000;16.390000;15.840000;15.820000	0.002965;0.008831;0.009397;0.012162;0.013900;0.015136;0.022961;0.026062;0.000000	4.740000;0.270000;1.120000;0.580000;0.370000;1.810000;0.550000;0.020000;NA	0.000005407465;0.000001815490;0.000001706058;0.000001318238;0.000001153437;0.000001059238;0.000000698222;0.000000615168;0.000000612342	0.000023;0.000008;0.000007;0.000006;0.000005;0.000005;0.000003;0.000003;0.000003
query7494	783.389	1564.76	2	1564.77	-0.009868	I	GEEYISDLDQLRK	L			68.08	1	0	gi|00489	52.65	0.999976	46.2777	131007_Sam_Standard_02_p.03936.03936.2	1564.791901[-0.028499];1564.798416[-0.035014];1564.780685[-0.017283];1564.763382[0.000020];1564.693298[0.070104];1564.774124[-0.010722];1564.798431[-0.035029];1564.725632[0.037770];1564.861282[-0.097880]	ISDYLGANGKGLMLN/;DSLYLLKNTEEIQ/;YIDSLGAGEVVAIMQ/;EGEYSRITRAPTW/;GEEYSSLTEYQFI/;EGEYRVPAAKMLAM/;GEYELNTGKVIIET/;EGYELDAEEREIL/;DAKNKKAFSPYILA/	15.430000;13.490000;12.710000;12.680000;11.310000;11.220000;10.210000;10.030000;9.850000	0.028642;0.044771;0.053580;0.053951;0.073961;0.075509;0.095280;0.099312;0.000000	1.940000;0.780000;0.030000;1.370000;0.090000;1.010000;0.180000;0.180000;NA	0.000005432375;0.000003475280;0.000002903954;0.000002883964;0.000002103729;0.000002060581;0.000001633013;0.000001566714;0.000001503107	0.000024;0.000015;0.000013;0.000013;0.000009;0.000009;0.000007;0.000007;0.000007
query3176	594.34	1186.67	2	1186.66	0.010259	L	AGVENVTELKK	N			77.55	1	0	gi|00489	51.89	0.999968	44.9866	131007_Sam_Standard_03_p.02657.02657.2	1186.583008[0.082982];1186.619339[0.046651];1186.619354[0.046636];1186.634613[0.031377];1186.619339[0.046651];1186.612823[0.053167];1186.630600[0.035390];1186.582962[0.083028];1186.674347[-0.008357]	AGVETTTGPLGQG/;ENIDIQSLKQ/;KVEDGLGDLNK/;QVERGLEPLF/;QITQELEQAK/;AGVLMDRNLAGA/;ARDIVQDSGVK/;QVEEGAEVAKAG/;AGGAIKMIAEVK/	25.660000;24.780000;23.510000;22.750000;22.420000;21.940000;21.360000;21.280000;20.830000	0.002716;0.003327;0.004457;0.005309;0.005728;0.006397;0.007311;0.007447;0.000000	0.880000;1.270000;0.760000;0.330000;0.480000;0.580000;0.080000;0.450000;NA	0.000006471221;0.000005284285;0.000003944448;0.000003311206;0.000003068925;0.000002747807;0.000002404287;0.000002360403;0.000002128072	0.000028;0.000023;0.000017;0.000014;0.000013;0.000012;0.000010;0.000010;0.000009
query1881	529.325	1056.64	2	1056.63	0.006474	N	AILGVSLAASR	A			82.86	1	0	gi|00924	51.45	0.999977	46.4135	131007_Sam_Standard_01_p.03730.03730.2	1056.640350[-0.004756];1056.654266[-0.018672];1056.676758[-0.041164];1056.571609[0.063985];1056.581482[0.054112];1056.608002[0.027592];1056.596756[0.038838];1056.596756[0.038838];1056.640350[-0.004756]	ALIRLSARTG/;ALLDKLAKSV/;VRVVSLKTR/;SPRLSLWQA/;ALLNEIEKAG/;IALSRLFHT/;LLAGWLALNS/;IAIKDALAWG/;ALRSLLGTAR/	31.410000;28.320000;27.280000;26.370000;26.370000;26.370000;22.670000;22.490000;21.820000	0.000723;0.001472;0.001871;0.002307;0.002307;0.002307;0.005408;0.005636;0.000000	3.090000;1.040000;0.910000;0.000000;0.000000;3.700000;0.180000;0.670000;NA	0.000007161271;0.000003515524;0.000002766878;0.000002243831;0.000002243831;0.000002243831;0.000000957172;0.000000918312;0.000000787028	0.000031;0.000015;0.000012;0.000010;0.000010;0.000010;0.000004;0.000004;0.000003
query2491	556.258	1110.5	2	1110.48	0.017172	F	AGENFHHGDK	L			73.61	1	0	gi|00924	51.04	0.999972	45.483	131007_Sam_Standard_01_p.03282.03282.2	1110.530548[-0.029108];1110.530533[-0.029093];1110.534561[-0.033121];1110.534546[-0.033106];1110.566940[-0.065500];1110.484268[0.017172];1110.425430[0.076010];1110.553024[-0.051584];1110.465179[0.036261]	GALDVHLSNEG/;AGNEHEDLVK/;QNFEAVLQY/;KEASSLWYAG/;KIHLVSDGDQ/;NNQVHEGWQ/;QWEDFSGDQ/;AGSRVGQGHKD/;PCGETVSYQQ/	22.570000;18.540000;18.480000;18.450000;18.380000;17.210000;16.990000;16.340000;16.290000	0.005534;0.013996;0.014191;0.014289;0.014521;0.019011;0.019999;0.023227;0.000000	4.030000;0.060000;0.030000;0.070000;1.170000;0.220000;0.650000;0.050000;NA	0.000007870235;0.000003111628;0.000003068935;0.000003047809;0.000002999078;0.000002290803;0.000002177648;0.000001874941;0.000001853479	0.000034;0.000014;0.000013;0.000013;0.000013;0.000010;0.000009;0.000008;0.000008
query6721	746.4	1490.79	2	1490.79	-0.005457	K	LPLVGGHEGAGVVVGM	G			68.05	1	0	gi|00330	51.04	0.999977	46.3264	131007_Sam_Standard_01_p.04391.04391.2	1490.809311[-0.023203];1490.772934[0.013174];1490.864273[-0.078165];1490.870834[-0.084726];1490.726822[0.059286];1490.728638[0.057470];1490.787659[-0.001551];1490.755142[0.030966];1490.856918[-0.070810]	AGRISGSTPFIVVTS/;WQSREVTTVVVTS/;YLQVLGLKLSAMR/;VAYVKQTALVVITS/;SWFVYLQYVVGM/;AMAKQSEVLDIDTA/;QYLILPGLAEMLM/;RTFVLGSNAMPAVE/;RDVKRVGYLVVST/	17.010000;13.390000;13.300000;12.430000;9.900000;9.810000;8.570000;8.180000;6.690000	0.019907;0.045814;0.046774;0.057148;0.102329;0.104472;0.138995;0.152055;0.000000	3.620000;0.090000;0.870000;2.530000;0.090000;1.240000;0.390000;1.490000;NA	0.000007870275;0.000003419715;0.000003349576;0.000002741510;0.000001531052;0.000001499650;0.000001127171;0.000001030362;0.000000731122	0.000034;0.000015;0.000015;0.000012;0.000007;0.000007;0.000005;0.000004;0.000003
query6311	724.411	1446.81	2	1446.8	0.009756	K	VVGLSTLPEIYEK	M			68.18	1	0	gi|00330	50.42	0.999977	46.3226	131007_Sam_Standard_01_p.04410.04410.2	1446.748032[0.058706];1446.833389[-0.026651];1446.783051[0.023687];1446.808243[-0.001505];1446.717712[0.089026];1446.736313[0.070425];1446.783081[0.023657];1446.783081[0.023657];1446.855804[-0.049066]	ALGVGPGRNWAHVN/;VAIATLVDILFTTA/;VRIVEAQQLASAY/;GIEVGTLPGQPAVIP/;VVQMVSTAAVQEW/;VKLCCYEGLLLGH/;AAVVIGTEIFGRNT/;GLPVSGHATATLNLP/;KEIAKQAAGPLPPK/	17.760000;14.240000;11.290000;10.850000;10.110000;9.540000;8.840000;8.750000;8.510000	0.016749;0.037670;0.074302;0.082224;0.097499;0.111173;0.130617;0.133352;0.000000	3.520000;2.950000;0.440000;0.740000;0.570000;0.700000;0.090000;0.240000;NA	0.000009077994;0.000004036360;0.000002046397;0.000001849225;0.000001559516;0.000001367697;0.000001164099;0.000001140223;0.000001078922	0.000039;0.000018;0.000009;0.000008;0.000007;0.000006;0.000005;0.000005;0.000005
query6080	713.896	1425.78	2	1425.77	0.004872	R	HLQIIYEINQR	F			89.41	1	0	gi|00489	50.32	0.999988	49.3387	131007_Sam_Standard_03_p.03313.03313.2	1425.834366[-0.056682];1425.736450[0.041234];1425.728577[0.049107];1425.750351[0.027333];1425.753723[0.023961];1425.820450[-0.042766];1425.783569[-0.005885];1425.772827[0.004857];1425.750351[0.027333]	HIKLIDLHIDPL/;LHQGEAGELRIGF/;AEASHNIVLLQTM/;SYQLLKAYDVNI/;SYKLKLTNEVMT/;HIKLAAFDVTRR/;IKHLLCCAIAASAL/;HIEIASRQINVF/;IHLQIAPYETIE/	39.090000;27.430000;26.560000;26.560000;23.950000;22.140000;19.090000;17.170000;17.130000	0.000123;0.001807;0.002208;0.002208;0.004027;0.006109;0.012331;0.019187;0.000000	11.660000;0.870000;0.000000;2.610000;1.810000;3.050000;1.920000;0.040000;NA	0.000009289556;0.000000633862;0.000000518794;0.000000518794;0.000000284443;0.000000187497;0.000000092896;0.000000059703;0.000000059155	0.000040;0.000003;0.000002;0.000002;0.000001;0.000001;0.000000;0.000000;0.000000
query3702	620.838	1239.66	2	1239.64	0.022176	D	YYFALAHTVR	D			62.83	1	0	gi|00489	50.14	0.999934	41.8217	131007_Sam_Standard_01_p.03825.03825.2	1239.693512[-0.031306];1239.632187[0.030019];1239.613525[0.048681];1239.653305[0.008901];1239.729904[-0.067698];1239.657150[0.005056];1239.645889[0.016317];1239.682327[-0.020121];1239.693527[-0.031321]	NRLQALLGVEQ/;LNVFASIGAVFC/;YYPLTEGEIR/;GDPGMSIQLLLP/;RLGQQIEKLGV/;VVQQQLNNGLQ/;ELEPQVAERLG/;VGNVGVGIADGIGL/;LGRIDVLVNNAG/	12.690000;11.770000;11.750000;11.630000;11.630000;11.630000;11.510000;10.230000;9.640000	0.053827;0.066527;0.066834;0.068707;0.068707;0.068707;0.070632;0.094842;0.000000	0.920000;0.020000;0.120000;0.000000;0.000000;0.120000;1.280000;0.590000;NA	0.000009682142;0.000007833781;0.000007797788;0.000007585277;0.000007585277;0.000007585277;0.000007378557;0.000005495047;0.000004797019	0.000042;0.000034;0.000034;0.000033;0.000033;0.000033;0.000032;0.000024;0.000021
query4537	646.808	1291.6	2	1291.6	-0.002161	Y	DLDFKNPNSDK	S			71.03	1	0	gi|00924	50.07	0.999971	45.3441	131007_Sam_Standard_02_p.02617.02617.2	1291.604462[-0.002192];1291.665939[-0.063669];1291.663300[-0.061030];1291.619003[-0.016733];1291.608475[-0.006205];1291.652054[-0.049784];1291.575439[0.026831];1291.652069[-0.049799];1291.564880[0.037390]	AGGTGTDNTSIWL/;KKYAELSEPID/;GARFAGGGQKKTD/;KSQSEMENAIR/;VEDKFGSWPEV/;DIDGAFVAKNSR/;DLFPSPCEKAAD/;DIDFPRTSVRS/;MPDERLGERSC/	20.960000;17.100000;16.020000;15.520000;15.090000;14.590000;13.410000;12.810000;12.200000	0.008017;0.019498;0.025003;0.028054;0.030974;0.034754;0.045604;0.052360;0.000000	3.860000;1.080000;0.500000;0.430000;0.500000;1.180000;0.600000;0.610000;NA	0.000009839824;0.000004045641;0.000003154912;0.000002811819;0.000002546756;0.000002269799;0.000001729766;0.000001506563;0.000001309144	0.000043;0.000018;0.000014;0.000012;0.000011;0.000010;0.000008;0.000007;0.000006
query15662	822.746	2465.22	3	2465.23	-0.017463	K	APNDFNLKDFNVGGYIQAVLDR	N			58.39	1	0	gi|00489	49.35	0.99994	42.2089	131007_Sam_Standard_01_p.06573.06573.3	2465.150757[0.065697];2465.281509[-0.065055];2465.193481[0.022973];2465.306671[-0.090217];2465.252518[-0.036064];2465.302628[-0.086174];2465.302643[-0.086189];2465.215958[0.000496];2465.184494[0.031960]	MQYANISPPELMGFSVNEPWR/;PSFEIASKLHEAQTLLGHFANR/;PFADESHRDENIQLLQNAAGAAV/;NVAPAAWVKKIKKPEQVDDGSW/;FAAQLLGLGYSKRLNGPSWEQM/;FPSKTPKNGSRNPKEPKELNPT/;VGQLFESDHKRIELLLQANQQ/;VHRVRDIEADTPARYNADPDR/;CSPLTKAHRPHVFQGDWCRDL/	9.040000;8.500000;7.860000;6.420000;5.840000;5.730000;4.670000;4.360000;4.280000	0.124738;0.141254;0.163682;0.228034;0.260615;0.267301;0.341193;0.366438;0.000000	0.540000;0.640000;1.440000;0.580000;0.110000;1.060000;0.310000;0.080000;NA	0.000011613788;0.000010255903;0.000008850624;0.000006352927;0.000005558708;0.000005419683;0.000004245940;0.000003953428;0.000003881270	0.000050;0.000045;0.000038;0.000028;0.000024;0.000024;0.000018;0.000017;0.000017
query3542	615.783	1229.55	2	1229.54	0.016072	L	YPNDNFFEGK	E			58.59	1	0	gi|00489	49.17	0.999914	40.6794	131007_Sam_Standard_02_p.04069.04069.2	1229.643799[-0.092433];1229.520035[0.031331];1229.596848[-0.045482];1229.560471[-0.009105];1229.506302[0.045064];1229.607407[-0.056041];1229.600006[-0.048640];1229.494873[0.056493];1229.604050[-0.052684]	KSVMPVAKGEGQ/;NIDFSDDYNK/;YPYDTTPFVK/;YPYDTTPFVQ/;YPEPDFMFNA/;AGTPAKMAAVADAG/;DAQELRQGEGK/;YQRDDEYNQ/;FLVDEHKQSQ/	9.420000;9.030000;8.940000;8.940000;8.350000;8.260000;8.000000;6.810000;6.770000	0.114288;0.125026;0.127644;0.127644;0.146218;0.149279;0.158489;0.208449;0.000000	0.390000;0.090000;0.000000;0.590000;0.090000;0.260000;1.190000;0.040000;NA	0.000012104946;0.000011065291;0.000010838342;0.000010838342;0.000009461562;0.000009267506;0.000008728967;0.000006636863;0.000006576016	0.000053;0.000048;0.000047;0.000047;0.000041;0.000040;0.000038;0.000029;0.000029
query8589	832.427	1662.84	2	1662.83	0.007725	I	TAIGDVVNHDPVVGDR	L			57.06	1	0	gi|00489	49.16	0.999929	41.507	131007_Sam_Standard_03_p.03945.03945.2	1662.857681[-0.017375];1662.850494[-0.010188];1662.808243[0.032063];1662.800186[0.040120];1662.832565[0.007741];1662.792313[0.047993];1662.912704[-0.072398];1662.771179[0.069127];1662.857681[-0.017375]	DGITAGEKDFSALIAR/;EYFVIDGPTPKAVLD/;RVCVSPMYADRNPR/;IESQLWGEVQFGDR/;GDIDGVQGQIVHALGAN/;CFLSIDEVDVPAEAR/;TLDGAVKLMLRYQVG/;TALWALYDSQGNPMP/;GIDRDLKELYNVQT/	7.900000;7.730000;6.790000;5.940000;5.500000;5.160000;4.870000;4.200000;4.140000	0.162181;0.168655;0.209411;0.254683;0.281838;0.304789;0.325837;0.380189;0.000000	0.170000;0.940000;0.850000;0.440000;0.340000;0.290000;0.670000;0.060000;NA	0.000012133031;0.000011667271;0.000009396569;0.000007726260;0.000006981831;0.000006456086;0.000006039059;0.000005175702;0.000005104689	0.000053;0.000051;0.000041;0.000034;0.000030;0.000028;0.000026;0.000022;0.000022
query3875	625.847	1249.68	2	1249.67	0.012792	E	YISDLDQLRK	L			63.35	1	0	gi|00489	48.89	0.999939	42.1521	131007_Sam_Standard_02_p.03948.03948.2	1249.655396[0.024022];1249.739380[-0.059962];1249.678040[0.001378];1249.605270[0.074148];1249.607773[0.071645];1249.696472[-0.017054];1249.619019[0.060399];1249.666611[0.012807];1249.619003[0.060415]	YISLDVADLKN/;YLKGDKKIKAS/;YLMAELVWLI/;LYKEFYASMV/;YLAPDSEILET/;YISLQRMAIR/;YLSEQAPTTIQ/;YLKNKAALDNT/;KAESQFAVLEE/	14.460000;13.390000;11.390000;11.300000;11.200000;10.670000;10.180000;9.980000;9.790000	0.035810;0.045814;0.072611;0.074131;0.075858;0.085704;0.095940;0.100462;0.000000	1.070000;2.000000;0.090000;0.100000;0.530000;0.490000;0.200000;0.190000;NA	0.000012911406;0.000010091914;0.000006367567;0.000006236968;0.000006094998;0.000005394778;0.000004819184;0.000004602285;0.000004405280	0.000056;0.000044;0.000028;0.000027;0.000026;0.000023;0.000021;0.000020;0.000019
query14991	782.416	2344.23	3	2344.29	-0.063331	D	RIPELRQIIEQLSSGFFSPK	Q			59.18	1	0	gi|00489	48.85	0.999964	44.427	131007_Sam_Standard_03_p.06489.06489.3	2344.141586[0.085366];2344.216171[0.010781];2344.213486[0.013466];2344.213470[0.013482];2344.212128[0.014824];2344.202255[0.024697];2344.205658[0.021294];2344.199097[0.027855];2344.148773[0.078179]	RPNVTNMRQALLMGEHYSVE/;IEEQPDLSGKYTQPILKEAVS/;GRQLAVRSDNAEPDLTYQAIK/;KGEQRAVNLTYDNPQELKNK/;LAIELASTAVQEADKAESRETI/;ETPVDEQGLQFARGSKEAALKA/;TIEPTGLGTVKDGGLNASLMGRAS/;ARLDQMMESVSQLLQLARAGQ/;LEQPNHHLIPADSEFYPPQL/	10.330000;6.090000;5.400000;4.960000;2.940000;2.440000;2.200000;1.960000;1.670000	0.092683;0.246037;0.288403;0.319154;0.508159;0.570164;0.602560;0.636796;0.000000	4.240000;0.690000;0.440000;2.020000;0.500000;0.240000;0.240000;0.290000;NA	0.000013031198;0.000004908902;0.000004187785;0.000003784289;0.000002376755;0.000002118285;0.000002004400;0.000001896637;0.000001774125	0.000057;0.000021;0.000018;0.000016;0.000010;0.000009;0.000009;0.000008;0.000008
query4065	631.329	1260.64	2	1260.65	-0.007229	D	WDKAWEVTVK	T			65.35	1	0	gi|00489	48.78	0.999935	41.8867	131007_Sam_Standard_01_p.04526.04526.2	1260.634995[0.008045];1260.631012[0.012028];1260.705078[-0.062038];1260.594589[0.048451];1260.576843[0.066197];1260.551010[0.092030];1260.661514[-0.018474];1260.580856[0.062184];1260.605820[0.037220]	VAKEYVAAQDPA/;GEDVAVSRTTVGA/;VSDRFRAALRA/;AETQRDLTAEQ/;QSMPGERETVAG/;EGDYLPDLDPQ/;HFFRDIVTLN/;EAAASIGMTPWQ/;GRDAGETELSAR/	16.570000;15.630000;15.550000;14.070000;13.310000;12.030000;11.790000;11.330000;10.990000	0.022029;0.027353;0.027861;0.039174;0.046666;0.062661;0.066222;0.073621;0.000000	0.940000;0.080000;1.480000;0.760000;1.280000;0.240000;0.460000;0.340000;NA	0.000013242558;0.000010665270;0.000010470607;0.000007446837;0.000006251322;0.000004655559;0.000004405263;0.000003962524;0.000003664138	0.000058;0.000046;0.000045;0.000032;0.000027;0.000020;0.000019;0.000017;0.000016
query4816	660.345	1318.68	2	1318.67	0.003164	N	VSVSEAAIEASTR	Y			67.86	1	0	gi|00330	48.67	0.999958	43.7303	131007_Sam_Standard_03_p.02757.02757.2	1318.618698[0.057302];1318.680222[-0.004222];1318.641357[0.034643];1318.688126[-0.012126];1318.598221[0.077779];1318.724487[-0.048487];1318.688110[-0.012110];1318.676849[-0.000849];1318.625214[0.050786]	DAGEEALTQVRM/;ASSLMGSIAGIAEL/;VGLCLSAISCAWP/;SGQQTAAQIFGLV/;WAPFAPGEANYP/;LATSARATIFTPA/;ADTYQVIRPVAS/;SAFAQSEPELKL/;ASIKEDEIQEGT/	19.190000;14.740000;14.500000;14.370000;14.070000;13.050000;12.500000;11.520000;11.080000	0.012050;0.033574;0.035481;0.036559;0.039174;0.049545;0.056234;0.070469;0.000000	4.450000;0.240000;0.130000;0.300000;1.020000;0.550000;0.980000;0.440000;NA	0.000013582559;0.000004875078;0.000004612980;0.000004476943;0.000004178127;0.000003303555;0.000002910594;0.000002322638;0.000002098851	0.000059;0.000021;0.000020;0.000019;0.000018;0.000014;0.000013;0.000010;0.000009
query6941	754.88	1507.75	2	1507.75	-0.005367	G	EEYISDLDQLRK	L			63.57	1	0	gi|00489	48.46	0.999934	41.7996	131007_Sam_Standard_02_p.03942.03942.2	1507.726654[0.019780];1507.720779[0.025655];1507.749146[-0.002712];1507.770477[-0.024043];1507.755188[-0.008754];1507.770432[-0.023998];1507.756714[-0.010280];1507.737900[0.008534];1507.722839[0.023595]	EEYLRRLDDAATG/;EQYNKAFSAHWK/;QRHLQLQQQQSD/;TVAGSVTPNFIMSGK/;SLVNLATTSSMEKQ/;AAKPDKSLYLACTQ/;MVWLFLPSMQKE/;QRYSLNDGEGIRT/;MPTTIEATELFQQ/	15.110000;13.860000;13.620000;12.620000;12.170000;10.190000;9.550000;9.280000;8.960000	0.030832;0.041115;0.043451;0.054702;0.060674;0.095719;0.110917;0.118032;0.000000	1.250000;0.240000;1.000000;0.450000;1.980000;0.640000;0.270000;0.320000;NA	0.000014255134;0.000010689842;0.000010115126;0.000008034730;0.000007243881;0.000004591677;0.000003962518;0.000003723671;0.000003459165	0.000062;0.000046;0.000044;0.000035;0.000031;0.000020;0.000017;0.000016;0.000015
query5415	686.34	1370.66	2	1370.64	0.028143	V	FAGENFHHGDKL	X			67.46	1	0	gi|00924	48.32	0.999949	42.9376	131007_Sam_Standard_03_p.03653.03653.2	1370.621017[0.043875];1370.683701[-0.018809];1370.759827[-0.094935];1370.640106[0.024786];1370.729294[-0.064402];1370.690216[-0.025324];1370.683884[-0.018992];1370.665268[-0.000376];1370.613632[0.051260]	VSNLYGMVTGMAE/;SMGRHIQSQRAT/;LSFGAFFIGLKAT/;FAMVRYDRAADG/;QTLLLPESAADIT/;GRLQNQNEQLAT/;FAMFQDIKRIC/;FRAGFSGLMIDAS/;TTGDAIYMRGADT/	19.140000;18.040000;15.470000;13.870000;12.530000;12.530000;11.860000;11.480000;11.060000	0.012190;0.015704;0.028379;0.041020;0.055847;0.055847;0.065163;0.071121;0.000000	1.100000;2.570000;1.600000;1.340000;0.000000;0.670000;0.380000;0.420000;NA	0.000014722376;0.000011428202;0.000006323797;0.000004374999;0.000003213497;0.000003213497;0.000002754089;0.000002523352;0.000002290751	0.000064;0.000050;0.000027;0.000019;0.000014;0.000014;0.000012;0.000011;0.000010
query4009	629.789	1257.56	2	1257.55	0.011129	V	FAGENFHHGDK	L			67.15	1	0	gi|00924	48.24	0.999952	43.1486	131007_Sam_Standard_01_p.03274.03274.2	1257.566605[-0.002787];1257.624115[-0.060297];1257.577850[-0.014032];1257.573807[-0.009989];1257.617584[-0.053766];1257.594894[-0.031076];1257.551315[0.012503];1257.631287[-0.067469];1257.581223[-0.017405]	FANWFSDATSL/;KYTAEDKFGVT/;AIGDVHFGWQE/;ELRGHEQDFQ/;FAGKPMYRTST/;QGANAEAAKAAGAE/;EYADKDNLYGA/;QAAERALNSVEA/;ERGNTFMFGVT/	18.910000;17.540000;15.140000;13.690000;13.130000;10.380000;9.900000;9.900000;9.850000	0.012853;0.017620;0.030620;0.042756;0.048641;0.091622;0.102329;0.102329;0.000000	1.370000;2.400000;1.450000;0.560000;2.750000;0.480000;0.000000;0.050000;NA	0.000014996122;0.000010939034;0.000006294757;0.000004507949;0.000003962588;0.000002103677;0.000001883558;0.000001883558;0.000001861997	0.000065;0.000048;0.000027;0.000020;0.000017;0.000009;0.000008;0.000008;0.000008
query1819	526.283	1050.55	2	1050.55	0.004705	I	SIVGSYVGNR	A			61.15	1	0	gi|00330	47.84	0.999907	40.3382	131007_Sam_Standard_03_p.02364.02364.2	1050.509415[0.041097];1050.541946[0.008566];1050.538574[0.011938];1050.523315[0.027197];1050.480423[0.070089];1050.578354[-0.027842];1050.502182[0.048330];1050.473007[0.077505];1050.534576[0.015936]	LSKDFDRGN/;ISMIYAISGP/;AEGAFYLPLA/;ATALESFLAE/;CPVGYQKEQ/;SIVGTLAMFL/;AEQELYWL/;AERYENNGV/;VTVYEADVR/	13.310000;12.400000;11.240000;10.840000;10.790000;10.790000;10.670000;10.240000;10.040000	0.046666;0.057544;0.075162;0.082414;0.083368;0.083368;0.085704;0.094624;0.000000	0.910000;1.160000;0.400000;0.050000;0.000000;0.120000;0.430000;0.200000;NA	0.000016442196;0.000013333981;0.000010208450;0.000009310217;0.000009203644;0.000009203644;0.000008952819;0.000008108860;0.000007743902	0.000071;0.000058;0.000044;0.000040;0.000040;0.000040;0.000039;0.000035;0.000034
query2818	576.779	1151.54	2	1151.53	0.009892	I	VNMLMHHDR	F			69.87	1	0	gi|00489	47.54	0.999967	44.7503	131007_Sam_Standard_01_p.03979.03979.2	1151.546738[-0.004040];1151.589661[-0.046963];1151.532135[0.010563];1151.604706[-0.062008];1151.564468[-0.021770];1151.618637[-0.075939];1151.564514[-0.021816];1151.553253[-0.010555];1151.572357[-0.029659]	GRMLMFPVSD/;VNMLVTLDTF/;VNMLWFDDL/;VNELHNTGLR/;NVMIIYRED/;GILDAGPATGALP/;VGGMYGVAQGTL/;VDGYEMLVNI/;EPWVTIHDR/	22.330000;14.130000;14.130000;13.930000;13.810000;12.840000;11.200000;10.270000;10.210000	0.005848;0.038637;0.038637;0.040458;0.041591;0.052000;0.075858;0.093972;0.000000	8.200000;0.000000;0.200000;0.120000;0.970000;1.640000;0.930000;0.060000;NA	0.000017619170;0.000002666769;0.000002666769;0.000002546745;0.000002477339;0.000001981461;0.000001358268;0.000001096441;0.000001081398	0.000077;0.000012;0.000012;0.000011;0.000011;0.000009;0.000006;0.000005;0.000005
query1846	527.757	1053.5	2	1053.48	0.022512	R	TNFDAFPDK	V			72.35	1	0	gi|00489	47.44	0.999972	45.4897	131007_Sam_Standard_03_p.02756.02756.2	1053.520309[-0.021067];1053.516479[-0.017237];1053.440353[0.058889];1053.520309[-0.021067];1053.480103[0.019139];1053.472687[0.026555];1053.436325[0.062917];1053.527725[-0.028483];1053.443710[0.055532]	TNAHAVAKDQ/;KSFDSVIMQ/;TNFDWGSDL/;TLNKHAAGDQ/;SGALFTDMNV/;QSYKNAQTD/;QSSGTFEQGN/;QSTFLVCTR/;QSDYPTCLQ/	24.910000;16.450000;14.970000;14.000000;12.380000;12.190000;11.970000;11.970000;9.810000	0.003228;0.022646;0.031842;0.039811;0.057810;0.060395;0.063533;0.063533;0.000000	8.460000;1.480000;0.970000;1.620000;0.190000;0.220000;0.000000;2.160000;NA	0.000018029668;0.000002570323;0.000001828049;0.000001462136;0.000001006903;0.000000963802;0.000000916195;0.000000916195;0.000000557170	0.000078;0.000011;0.000008;0.000006;0.000004;0.000004;0.000004;0.000004;0.000002
query3433	609.834	1217.65	2	1217.64	0.010122	R	MSLVEEGAVKR	I			68.33	1	0	gi|00489	47.42	0.999882	39.2681	131007_Sam_Standard_02_p.02110.02110.2	1217.575027[0.078879];1217.654373[-0.000467];1217.665573[-0.011667];1217.650314[0.003592];1217.571014[0.082892];1217.643768[0.010138];1217.706009[-0.052103];1217.662430[-0.008524];1217.640427[0.013479]	MSLHFEAAAIE/;VDVVFVDLAEI/;FIAAQAGLDLLS/;IATTNSGELLSL/;SMLPETEQQR/;IASMREQALLS/;VPFSVFPIISL/;AIRVCNMVIVT/;GRGIYEGPGISI/	20.910000;20.910000;20.320000;19.640000;19.230000;18.900000;18.340000;18.210000;18.040000	0.008110;0.008110;0.009290;0.010864;0.011940;0.012882;0.014655;0.015101;0.000000	0.000000;0.590000;0.680000;0.410000;0.330000;0.560000;0.130000;0.170000;NA	0.000018111257;0.000018111257;0.000015810609;0.000013519125;0.000012301232;0.000011401148;0.000010021866;0.000009726321;0.000009352950	0.000079;0.000079;0.000069;0.000059;0.000053;0.000050;0.000044;0.000042;0.000041
query7527	784.378	1566.74	2	1566.74	0.006231	K	DAFLGSFLYEYSR	R			76.83	1	0	gi|02769	47.1	0.999979	46.7155	131007_Sam_Standard_01_p.05797.05797.2	1566.683807[0.057867];1566.692566[0.049108];1566.717712[0.023962];1566.812927[-0.071253];1566.735489[0.006185];1566.746033[-0.004359];1566.837418[-0.095744];1566.756561[-0.014887];1566.767822[-0.026148]	VQDPNYLFQEEDA/;WFLACSTPAHTGGYG/;EGFLHVFPQIYDC/;WFIGAVTRPMYRA/;GEFGGPWIDALFTGT/;AFPMGSGSDSQLSKR/;LRHMLPNAMVATLT/;SYSIDALNISIGEW/;YVAGVNFLLSNQQD/	29.730000;13.470000;10.930000;10.700000;10.210000;10.020000;8.790000;7.970000;7.970000	0.001064;0.044978;0.080724;0.085114;0.095280;0.099541;0.132130;0.159588;0.000000	16.260000;2.540000;0.230000;0.490000;0.190000;1.230000;0.820000;0.000000;NA	0.000019498031;0.000000461308;0.000000257034;0.000000243776;0.000000217766;0.000000208445;0.000000157033;0.000000130014;0.000000130014	0.000085;0.000002;0.000001;0.000001;0.000001;0.000001;0.000001;0.000001;0.000001
query2963	582.828	1163.64	2	1163.63	0.010854	S	ISIVGSYVGNR	A			80.89	1	0	gi|00330	47.07	0.999968	44.892	131007_Sam_Standard_01_p.03165.03165.2	1163.662415[-0.021693];1163.643784[-0.003062];1163.662415[-0.021693];1163.582245[0.058477];1163.666229[-0.025507];1163.629852[0.010870];1163.666214[-0.025492];1163.662369[-0.021647];1163.698776[-0.058054]	LSIVGTLAMFL/;LSLVLFSSGIE/;LSLVMDVFKL/;LSLREIFGDD/;LSLRLSELHP/;ISRISQQIGY/;LEARHIELIA/;IAEMYLLKAI/;LSLIFKLISM/	33.820000;27.570000;27.570000;20.270000;20.270000;18.320000;17.460000;16.670000;16.390000	0.000415;0.001750;0.001750;0.009397;0.009397;0.014723;0.017947;0.021528;0.000000	6.250000;0.000000;7.300000;0.000000;1.950000;0.860000;0.790000;0.280000;NA	0.000019632966;0.000004655710;0.000004655710;0.000000866934;0.000000866934;0.000000553332;0.000000453927;0.000000378430;0.000000354802	0.000085;0.000020;0.000020;0.000004;0.000004;0.000002;0.000002;0.000002;0.000002
query3614	618.791	1235.57	2	1235.58	-0.010249	I	DGGEGKEELFR	S			60.06	1	0	gi|00330	46.88	0.999905	40.2356	131007_Sam_Standard_01_p.02588.02588.2	1235.593475[-0.025507];1235.601563[-0.033594];1235.589447[-0.021479];1235.556427[0.011541];1235.603378[-0.035410];1235.603378[-0.035410];1235.557114[0.010854];1235.662216[-0.094248];1235.579544[-0.011576]	NWGVSEIEFR/;VRCGDRMPFR/;KTADPPATNANH/;DRSGIREEACT/;DKTAESGLPYVG/;QTLFADDSNLI/;QDDWTAPTFR/;GAGGYSSLGKIAR/;EEREHPHFR/	13.180000;11.720000;10.840000;10.120000;9.260000;8.900000;8.770000;8.760000;8.280000	0.048084;0.067298;0.082414;0.097275;0.118577;0.128825;0.132739;0.133045;0.000000	1.460000;0.880000;0.720000;0.860000;0.360000;0.130000;0.010000;0.480000;NA	0.000020509679;0.000014654090;0.000011966272;0.000010138153;0.000008316850;0.000007655241;0.000007429488;0.000007412400;0.000006636802	0.000089;0.000064;0.000052;0.000044;0.000036;0.000033;0.000032;0.000032;0.000029
query2108	539.301	1076.59	2	1076.58	0.011036	Y	YFALAHTVR	D			69.53	1	0	gi|00489	46.25	0.999963	44.3116	131007_Sam_Standard_03_p.03760.03760.2	1076.532440[0.055302];1076.609055[-0.021313];1076.565475[0.022267];1076.517838[0.069904];1076.561447[0.026295];1076.623001[-0.035259];1076.586563[0.001179];1076.550186[0.037556];1076.575363[0.012379]	LMHLAASAYT/;GRAARALVYT/;YFAHGAVLSI/;LDWPAAIYE/;NPVALGQEIH/;VGVQAKIVTY/;NAAAALASYIL/;ALGLNNIAEY/;LPTTGIIAEY/	23.280000;13.930000;13.710000;11.290000;11.170000;10.890000;10.740000;10.330000;10.020000	0.004699;0.040458;0.042560;0.074302;0.076384;0.081470;0.084333;0.092683;0.000000	9.350000;0.220000;2.420000;0.120000;0.280000;0.150000;0.410000;0.310000;NA	0.000023712858;0.000002754127;0.000002618086;0.000001499629;0.000001458760;0.000001367678;0.000001321247;0.000001202220;0.000001119396	0.000103;0.000012;0.000011;0.000007;0.000006;0.000006;0.000006;0.000005;0.000005
query4499	644.864	1287.71	2	1287.7	0.010305	K	VNQIGTLSESIK	A			65.47	1	0	gi|00924	46.18	0.999912	40.5406	131007_Sam_Standard_03_p.02980.02980.2	1287.703430[0.010290];1287.788742[-0.075022];1287.743835[-0.030115];1287.649292[0.064428];1287.777496[-0.063776];1287.693512[0.020208];1287.741135[-0.027415];1287.620758[0.092962];1287.686340[0.027380]	VNKLDTATVASLG/;AAAKIRHVVRAP/;VLVAFALLDSLQ/;VLEMGTQNVGQL/;NARLSAFLRLK/;GRKLALAYDPGQ/;RGKLNGIGFAQK/;AAAAGVQQWGSKD/;NVGAIDPLFVFP/	19.290000;16.910000;15.790000;15.590000;14.690000;13.090000;13.090000;12.900000;11.240000	0.011776;0.020370;0.026363;0.027606;0.033963;0.049091;0.049091;0.051286;0.000000	2.380000;1.120000;0.200000;0.900000;1.600000;0.000000;0.190000;1.660000;NA	0.000024096926;0.000013930338;0.000010763702;0.000010279255;0.000008355292;0.000005780450;0.000005780450;0.000005533013;0.000003775389	0.000105;0.000060;0.000047;0.000045;0.000036;0.000025;0.000025;0.000024;0.000016
query7950	805.44	1608.87	2	1608.86	0.00269	K	VHINPNSLFDVQVK	R			62.87	1	0	gi|00489	45.1	0.999894	39.7501	131007_Sam_Standard_01_p.04194.04194.2	1608.862366[0.002720];1608.888870[-0.023784];1608.814774[0.050312];1608.808243[0.056843];1608.835892[0.029194];1608.866394[-0.001308];1608.852493[0.012593];1608.891571[-0.026485];1608.826004[0.039082]	YETLRVVNERIAF/;VHLPGQYKVHRLY/;YLPVDEGGIPHDGLK/;VHKNPEGVAMGINPF/;LSRTTLSDADSLIAF/;PYLVLFSRLGNYPA/;IRVHTQYAGHPIAF/;VGEVKLFLWSTIAF/;PENTVPQSVPPARAF/	17.770000;16.490000;13.180000;11.880000;11.350000;11.250000;11.250000;11.200000;10.420000	0.016711;0.022439;0.048084;0.064863;0.073282;0.074989;0.074989;0.075858;0.000000	1.280000;3.310000;1.300000;0.530000;0.100000;0.000000;0.050000;0.780000;NA	0.000030899681;0.000023011980;0.000010738757;0.000007960750;0.000007046184;0.000006885794;0.000006885794;0.000006806972;0.000005687927	0.000134;0.000100;0.000047;0.000035;0.000031;0.000030;0.000030;0.000030;0.000025
query5736	700.848	1399.68	2	1399.68	0.004063	I	FYESHGKLEYK	D			57.98	1	0	gi|00330	44.6	0.999887	39.4608	131007_Sam_Standard_03_p.02878.02878.2	1399.680573[0.000675];1399.745956[-0.064708];1399.734711[-0.053463];1399.745941[-0.064693];1399.757172[-0.075924];1399.661942[0.019306];1399.590530[0.090718];1399.669327[0.011921];1399.619034[0.062214]	TSCFLIQNALYGA/;KYSLATGQLPSVH/;ERISISYLVGYT/;QYSQKKKSLGFS/;QTAVQHAINKKY/;EYQETFDKVNK/;SRGGHDNYGFYQ/;EVDLNFLEMYK/;RLMFNGDEQYGA/	13.380000;12.030000;8.470000;8.410000;6.350000;6.260000;5.770000;5.580000;5.420000	0.045920;0.062661;0.142233;0.144212;0.231739;0.236592;0.264850;0.276694;0.000000	1.350000;3.560000;0.060000;2.060000;0.090000;0.490000;0.190000;0.160000;NA	0.000034669759;0.000025406850;0.000011193111;0.000011039536;0.000006869907;0.000006729005;0.000006011057;0.000005753748;0.000005545629	0.000151;0.000110;0.000049;0.000048;0.000030;0.000029;0.000026;0.000025;0.000024
query14864	582.773	2327.06	4	2327.05	0.017495	R	IEEELGDNAVFAGENFHHGDK	L			48.11	1	0	gi|00924	44.6	0.999965	44.6002	131007_Sam_Standard_01_p.03280.03280.4	2327.106339[-0.043403]	QAVVSAQSSLDAMEAGYSVGTRT/	3.51	0.178649	NA	3.46725e-05	0.000151
query6512	734.374	1466.73	2	1466.73	0.004307	C	FSALTPDETYVPK	A			65.67	1	0	gi|02769	43.65	0.999914	40.6617	131007_Sam_Standard_03_p.03443.03443.2	1466.737381[-0.003765];1466.740524[-0.006908];1466.725296[0.008320];1466.690247[0.043369];1466.684875[0.048741];1466.725281[0.008335];1466.740555[-0.006939];1466.747726[-0.014110];1466.761658[-0.028042]	LCATIFNGAISRVC/;EAAFTRLPLYADT/;AAVYDLGNGTSVIST/;HPLATNHQTQYGT/;AQSGNTKSSSLTADT/;NKVTTSSPAYLEGT/;TDFTFRLAPLDAT/;SRLNPQLANEGAPT/;IHPATGISESELLT/	22.020000;18.080000;12.690000;12.580000;12.120000;11.220000;9.850000;9.760000;9.040000	0.006281;0.015560;0.053827;0.055208;0.061376;0.075509;0.103514;0.105682;0.000000	3.940000;5.390000;0.110000;0.460000;0.900000;1.370000;0.090000;0.720000;NA	0.000043148202;0.000017416573;0.000005034574;0.000004908657;0.000004415325;0.000003588911;0.000002617958;0.000002564264;0.000002172515	0.000187;0.000076;0.000022;0.000021;0.000019;0.000016;0.000011;0.000011;0.000009
query5784	702.864	1403.71	2	1403.68	0.036139	D	SFAAGWGVMVSHR	S			69.07	1	0	gi|00924	43.09	0.999936	41.9403	131007_Sam_Standard_01_p.04288.04288.2	1403.707840[0.005148];1403.707840[0.005148];1403.707840[0.005148];1403.729675[-0.016687];1403.623825[0.089163];1403.740845[-0.027857];1403.730301[-0.017313];1403.668106[0.044882];1403.802399[-0.089411]	ESLNIEVSVAGRM/;DVKTICEQEARI/;GTERLAEVVEKCA/;FGTGVLGTDLNTPI/;QPEAMEVSNLESA/;ERASLEIIQQAF/;EVNSKSGRAVAMR/;QSFDAVEALGRDP/;FASNTTLLILLQA/	25.980000;14.740000;12.160000;11.790000;11.370000;10.930000;10.660000;10.250000;10.200000	0.002523;0.033574;0.060814;0.066222;0.072946;0.080724;0.085901;0.094406;0.000000	11.240000;2.580000;0.370000;0.420000;0.440000;0.270000;0.410000;0.050000;NA	0.000049087647;0.000003689540;0.000002036912;0.000001870562;0.000001698135;0.000001534519;0.000001442023;0.000001312116;0.000001297096	0.000213;0.000016;0.000009;0.000008;0.000007;0.000007;0.000006;0.000006;0.000006
query3198	596.806	1191.6	2	1191.6	0.002339	L	QEFMIAPTGAK	T			64.3	1	0	gi|00924	43.02	0.999857	38.4321	131007_Sam_Standard_03_p.03022.03022.2	1191.628799[-0.030681];1191.624771[-0.026653];1191.661163[-0.063045];1191.624771[-0.026653];1191.544128[0.053990];1191.613541[-0.015423];1191.573105[0.025013];1191.581161[0.016957];1191.534241[0.063877]	EKFLTWLGAAG/;KEFTADPKRT/;SGLAGSALRFTL/;QEHIIVKPDN/;EKEMSIVQDN/;TREDFALVIE/;EKSNSKDEKGA/;KEFSKLDYY/;EQSAQYCVKH/	21.280000;18.040000;15.760000;14.420000;14.200000;14.060000;14.050000;13.870000;13.300000	0.007447;0.015704;0.026546;0.036141;0.038019;0.039264;0.039355;0.041020;0.000000	3.240000;2.280000;1.340000;0.220000;0.140000;0.010000;0.180000;0.570000;NA	0.000049881291;0.000023655802;0.000013993865;0.000010278688;0.000009770970;0.000009461014;0.000009439254;0.000009056026;0.000007942143	0.000217;0.000103;0.000061;0.000045;0.000042;0.000041;0.000041;0.000039;0.000034
query6173	480.621	1438.84	3	1438.8	0.035345	R	RHPEYAVSVLLR	L			61.06	1	0	gi|02769	42.62	0.999885	39.3878	131007_Sam_Standard_01_p.03227.03227.3	1438.861984[-0.022180];1438.814346[0.025458];1438.850723[-0.010919];1438.836823[0.002981];1438.796631[0.043173];1438.895203[-0.055399];1438.861969[-0.022165];1438.815674[0.024130];1438.797287[0.042517]	RTVTKPAVAEVLR/;IEALAQGAADLVLR/;ILERLEDVALLR/;LQRLTAAVNRAVQ/;PTGLQGSLVVCPIR/;FLLLPGIVWIGIV/;IRAGIAGITEGLIR/;HRFEIERIARI/;DFHQLIVWVLVA/	18.440000;15.530000;9.370000;9.190000;7.830000;7.050000;6.510000;6.490000;6.450000	0.014322;0.027990;0.115611;0.120504;0.164816;0.197242;0.223357;0.224388;0.000000	2.910000;6.160000;0.180000;1.360000;0.780000;0.540000;0.020000;0.040000;NA	0.000054695298;0.000027986590;0.000006775635;0.000006500548;0.000004752805;0.000003971458;0.000003507115;0.000003491001;0.000003458995	0.000238;0.000122;0.000029;0.000028;0.000021;0.000017;0.000015;0.000015;0.000015
query4165	633.84	1265.67	2	1265.66	0.004659	K	LITAIGDVVNHD	P			57.21	1	0	gi|00489	42.23	0.999802	37.0353	131007_Sam_Standard_01_p.03685.03685.2	1265.709167[-0.042933];1265.607437[0.058797];1265.643799[0.022435];1265.650330[0.015904];1265.632553[0.033681];1265.713211[-0.046977];1265.697952[-0.031718];1265.734329[-0.068095];1265.734314[-0.068080]	LLKVDEHSGLR/;VVGEVVECAQHP/;LLTPQMAQLHD/;VIDAIGEGPIEGP/;ILEQVGDYMKA/;VIWITAIGLGHS/;LLSLVGLGDKHD/;PTVKNQSLPLAV/;ILIEDGIQPLR/	14.980000;13.000000;9.350000;9.340000;8.990000;8.850000;8.230000;8.210000;8.210000	0.031769;0.050119;0.116145;0.116413;0.126183;0.130317;0.150314;0.151008;0.000000	1.980000;3.650000;0.010000;0.350000;0.140000;0.620000;0.020000;0.000000;NA	0.000059829316;0.000037923991;0.000016364926;0.000016327287;0.000015063089;0.000014585255;0.000012644860;0.000012586763;0.000012586763	0.000260;0.000165;0.000071;0.000071;0.000065;0.000063;0.000055;0.000055;0.000055
query4352	639.785	1277.56	2	1277.53	0.024388	R	GYNAQEYYDR	I			55.76	1	0	gi|00489	42.08	0.99964	34.4422	131007_Sam_Standard_03_p.01885.01885.2	1277.596161[-0.040523];1277.592148[-0.036510];1277.574417[-0.018779];1277.567001[-0.011363];1277.604050[-0.048412];1277.613907[-0.058269];1277.596863[-0.041225];1277.626526[-0.070888];1277.567657[-0.012019]	EILYPPSSGNAM/;AALTAGEMAQQST/;LCSEVIGGGGAGGAM/;NRNLMDVTNSD/;NYQQELFHVT/;YGNAEIEAGIEI/;GRMDRSIGGQMA/;IPGREGFHQHT/;WDSELNKWSGG/	13.680000;13.350000;12.510000;12.230000;11.550000;11.380000;10.020000;9.920000;9.090000	0.042855;0.046238;0.056105;0.059841;0.069984;0.072778;0.099541;0.101859;0.000000	0.330000;0.840000;0.280000;0.680000;0.170000;1.360000;0.100000;0.830000;NA	0.000061921834;0.000057391003;0.000047298113;0.000044344914;0.000037917860;0.000036462279;0.000026658997;0.000026052165;0.000021520077	0.000269;0.000249;0.000205;0.000193;0.000165;0.000158;0.000116;0.000113;0.000093
query13926	733.376	2197.1	3	2197.09	0.009848	L	NGGSHAGGALALQEFMIAPTGAK	T			48.82	1	0	gi|00924	42.02	0.999657	34.6441	131007_Sam_Standard_01_p.04731.04731.3	2197.172455[-0.067636];2197.185471[-0.080652];2197.141907[-0.037088];2197.185486[-0.080667];2197.039520[0.065299];2197.110229[-0.005410];2197.139191[-0.034372];2197.149124[-0.044305];2197.189041[-0.084222]	RHHLLMCRHLPDGGKLTLT/;SPLPAGAIDALAGELSRRIQY/;AVAHLTTLQEIQAFDLWIE/;WAAIVADLRGEALLSKGDKQG/;EIGITGCNFAVAETGSVCLVTN/;RTMFIGGLQGAKWEIPHQE/;DNRIHAVSIKAYTPAEWAR/;SAGDTFSLVGEKLLLGRHNPS/;LMEVALLVGSIFAAIKMAGYT/	6.800000;5.960000;5.830000;5.670000;4.420000;2.710000;2.630000;2.390000;2.350000	0.208930;0.253513;0.261216;0.271019;0.361410;0.535797;0.545758;0.576766;0.000000	0.840000;0.130000;0.160000;1.250000;1.710000;0.080000;0.240000;0.040000;NA	0.000062784279;0.000051742917;0.000050217017;0.000048400618;0.000036295343;0.000024482226;0.000024035375;0.000022743165;0.000022534655	0.000273;0.000225;0.000218;0.000210;0.000158;0.000106;0.000104;0.000099;0.000098
query1972	534.251	1066.49	2	1066.47	0.016286	Y	PNDNFFEGK	E			71.13	1	0	gi|00489	41.83	0.999889	39.5415	131007_Sam_Standard_03_p.04040.04040.2	1066.435577[0.052679];1066.479172[0.009084];1066.544739[-0.056483];1066.504333[-0.016077];1066.512390[-0.024134];1066.494446[-0.006190];1066.527664[-0.039408];1066.456741[0.031515];1066.475342[0.012914]	NPDNFFAEN/;PRNHTEEGQ/;TKPFNFEGK/;PSIAHATGEGQ/;PVDYLFWQ/;NFGRGNFAGQ/;KFGFFFQF/;LDTSDQFGGQ/;PNFATTMTNA/	29.300000;21.800000;21.360000;21.040000;20.930000;12.630000;10.750000;10.300000;10.280000	0.001175;0.006607;0.007311;0.007870;0.008072;0.054576;0.084140;0.093325;0.000000	7.500000;0.440000;0.320000;0.110000;8.300000;1.880000;0.450000;0.020000;NA	0.000065607234;0.000011666799;0.000010542697;0.000009793811;0.000009548865;0.000001412381;0.000000916119;0.000000825946;0.000000822151	0.000285;0.000051;0.000046;0.000043;0.000041;0.000006;0.000004;0.000004;0.000004
query2049	537.281	1072.55	2	1072.54	0.006918	V	ADDLTVTNPK	R			69.88	1	0	gi|00924	41.51	0.999769	36.3663	131007_Sam_Standard_02_p.04340.04340.2	1072.612839[-0.065867];1072.577759[-0.030787];1072.585159[-0.038187];1072.598892[-0.051920];1072.511047[0.035925];1072.518921[0.028051];1072.631424[-0.084452];1072.631424[-0.084452];1072.591690[-0.044718]	TVTLTVKPTN/;SARSRTLPW/;RSVKGMLPW/;EGIDTVRRK/;ADDLMAEVIP/;SAQQFPLEGP/;TAKNLMLVIA/;ASAKAVMVLIA/;VSDLHIKVY/	28.370000;27.330000;24.770000;23.500000;21.510000;20.360000;19.980000;19.050000;18.100000	0.001455;0.001849;0.003334;0.004467;0.007063;0.009204;0.010046;0.012445;0.000000	1.040000;2.560000;1.270000;1.990000;1.150000;0.380000;0.930000;0.950000;NA	0.000070615449;0.000055577592;0.000030824761;0.000023009105;0.000014551231;0.000011166054;0.000010230567;0.000008258472;0.000006635898	0.000307;0.000241;0.000134;0.000100;0.000063;0.000048;0.000044;0.000036;0.000029
query7632	789.905	1577.8	2	1577.79	0.001317	K	AVDDFLISLDGTANK	S			62.7	1	0	gi|00924	41.44	0.999801	37.0203	131007_Sam_Standard_02_p.05013.05013.2	1577.812347[-0.017329];1577.885086[-0.090068];1577.746918[0.048100];1577.891617[-0.096599];1577.808273[-0.013255];1577.816147[-0.021129];1577.816330[-0.021312];1577.782455[0.012563];1577.848694[-0.053676]	MPGVGYLSLLGGGLGTS/;IFMRILEVSTAVSL/;ACYLPLLMSPELDN/;TVIFSILSSLIDSAI/;DAIMSSLSITEKRQ/;TERHHLSISGSEIL/;ETFIGILMLWLNE/;EEAFAGEAITLVLTD/;AVFACISLISQDIAK/	21.260000;19.070000;16.820000;13.640000;13.360000;13.360000;11.570000;11.280000;11.190000	0.007482;0.012388;0.020797;0.043251;0.046132;0.046132;0.069663;0.074473;0.000000	2.190000;2.250000;3.180000;0.280000;0.000000;1.790000;0.290000;0.090000;NA	0.000071765174;0.000043342478;0.000025817474;0.000012414057;0.000011638948;0.000011638948;0.000007707504;0.000007209643;0.000007061773	0.000312;0.000188;0.000112;0.000054;0.000051;0.000051;0.000033;0.000031;0.000031
query2938	582.322	1162.63	2	1162.62	0.006369	K	LVNELTEFAK	T			60.04	1	0	gi|02769	41.22	0.999643	34.4689	131007_Sam_Standard_02_p.03727.03727.2	1162.550613[0.079123];1162.598221[0.031515];1162.659760[-0.030024];1162.616852[0.012884];1162.642014[-0.012278];1162.609467[0.020269];1162.638611[-0.008875];1162.550629[0.079107];1162.634583[-0.004847]	ALVSTPSYDPN/;LVNEKDKGNF/;LAAISITFAAVS/;LVNKGWTMKS/;IVGADVLMFAK/;AIVENRPGGGPP/;YYLEIRLPP/;PDNIFTVTQE/;LAAAESARYIV/	18.820000;17.740000;17.710000;17.520000;15.400000;14.080000;13.310000;11.670000;11.230000	0.013122;0.016827;0.016943;0.017701;0.028840;0.039084;0.046666;0.068077;0.000000	1.080000;0.030000;0.190000;2.120000;1.320000;0.770000;1.640000;0.440000;NA	0.000075482238;0.000058863322;0.000058458110;0.000055955756;0.000034343517;0.000025342227;0.000021224857;0.000014549389;0.000013147548	0.000328;0.000256;0.000254;0.000243;0.000149;0.000110;0.000092;0.000063;0.000057
query6543	735.857	1469.7	2	1469.71	-0.005	A	VFAGENFHHGDKL	X			58.96	1	0	gi|00924	40.59	0.999522	33.2037	131007_Sam_Standard_02_p.03704.03704.2	1469.755493[-0.055323];1469.755478[-0.055308];1469.719086[-0.018916];1469.671677[0.028493];1469.697281[0.002889];1469.668304[0.031866];1469.701340[-0.001170];1469.660950[0.039220];1469.797714[-0.097544]	VYHAFSFSTLVVT/;VFAIFAYGGIEAVGG/;VFANWFSDATSLL/;KTCVVACPYGAMEV/;AFHAAAMLAGPDAID/;DMHFSGLMYAVLS/;FVAWCPNTLVYGT/;AVFCQQTGFGDGQI/;KITLIDDAPGELVS/	18.370000;18.150000;18.070000;16.370000;15.930000;15.870000;15.090000;11.300000;10.600000	0.014555;0.015311;0.015596;0.023067;0.025527;0.025882;0.030974;0.074131;0.000000	0.220000;0.080000;1.700000;0.440000;0.060000;0.780000;3.790000;0.700000;NA	0.000087255390;0.000082945392;0.000081431468;0.000055054429;0.000049749906;0.000049067312;0.000041000794;0.000017131377;0.000014581166	0.000379;0.000360;0.000354;0.000239;0.000216;0.000213;0.000178;0.000074;0.000063
query12474	682.341	2044	3	2044.02	-0.020181	R	RHPYFYAPELLYYANK	Y			43.01	1	0	gi|02769	40.42	0.999376	32.0469	131007_Sam_Standard_03_p.04426.04426.3	2044.004745[-0.004296];2043.997375[0.003074];2043.917389[0.083060];2044.044998[-0.044549];2044.067627[-0.067178];2044.012634[-0.012185];2043.929306[0.071143];2044.021194[-0.020745];2043.928146[0.072303]	VDPGRNSANQAAYLPMVLE/;RVNEWQALLASSDNQVGGT/;EFPPTEYRADINGASGGTY/;QSNHAGGILGGISSGQQIIAH/;PRSHCEHWKLLLGPASLT/;SIISRTIPGQGHGNQYYPG/;HDQLNADFGRCGSNAARNV/;EDLVDQAIVKATTDVEVAE/;SEQKVETSAFPAAMCFLAD/	2.590000;1.660000;1.580000;1.380000;1.270000;1.250000;1.240000;0.960000;0.590000	0.550808;0.682339;0.695024;0.727780;0.746449;0.749894;0.751623;0.801678;0.000000	0.930000;0.080000;0.200000;0.110000;0.020000;0.010000;0.280000;0.370000;NA	0.000090725389;0.000073236712;0.000071899992;0.000068663959;0.000066946648;0.000066639056;0.000066485791;0.000062334552;0.000057243851	0.000394;0.000318;0.000312;0.000298;0.000291;0.000289;0.000289;0.000271;0.000249
query3847	625.344	1248.67	2	1248.66	0.013173	V	GLSTLPEIYEK	M			56.74	1	0	gi|00330	40.39	0.999671	34.8255	131007_Sam_Standard_03_p.03616.03616.2	1248.693848[-0.020534];1248.645767[0.027547];1248.642410[0.030904];1248.678772[-0.005458];1248.707764[-0.034450];1248.635056[0.038258];1248.697876[-0.024562];1248.609848[0.063466];1248.682632[-0.009318]	GLSRHNLIAPAT/;MQVILLLSMSD/;IGSDVLLCPLYG/;GLMYELAVQIL/;INGKDYSVKII/;VATTVPAGTQGTF/;QRFFKAVEPK/;QEPVAESPKGHA/;LLNLGHGLVGEQ/	16.350000;14.240000;13.270000;12.950000;10.570000;9.690000;9.330000;9.130000;8.650000	0.023174;0.037670;0.047098;0.050699;0.087700;0.107399;0.116681;0.122180;0.000000	2.110000;0.970000;0.320000;2.380000;0.880000;0.360000;0.200000;0.480000;NA	0.000091381232;0.000056215621;0.000044963179;0.000041769282;0.000024146657;0.000019717734;0.000018149180;0.000017332332;0.000015518760	0.000397;0.000244;0.000195;0.000181;0.000105;0.000086;0.000079;0.000075;0.000067
query3258	600.299	1198.58	2	1198.57	0.013494	V	MENFVAFVDK	C			55.08	1	0	gi|02769	40.22	0.999474	32.789	131007_Sam_Standard_02_p.05346.05346.2	1198.569244[0.013494];1198.569244[0.013494];1198.565216[0.017522];1198.605637[-0.022899];1198.572617[0.010121];1198.565201[0.017537];1198.613510[-0.030772];1198.569260[0.013478];1198.577148[0.005590]	MLGYNVFIDQ/;YLAACGVFIGDA/;LSHVAIGEMGEG/;TMVFKAFDAGL/;CSLAFALTGCIT/;HKLEADMLDAG/;TFSVWFGISR/;GYTSLVWATVC/;GVIFFGFGNGGQ/	14.860000;14.560000;13.710000;12.210000;11.750000;11.740000;11.320000;11.300000;11.240000	0.032659;0.034995;0.042560;0.060117;0.066834;0.066988;0.073790;0.074131;0.000000	0.300000;0.850000;1.500000;0.460000;0.010000;0.420000;0.020000;0.060000;NA	0.000095010464;0.000088668924;0.000072907371;0.000051614466;0.000046427088;0.000046320308;0.000042050527;0.000041857322;0.000041283018	0.000413;0.000385;0.000317;0.000224;0.000202;0.000201;0.000183;0.000182;0.000179
query3054	589.303	1176.59	2	1176.58	0.013922	D	LDFKNPNSDK	S			61.54	1	0	gi|00924	40	0.999721	35.5455	131007_Sam_Standard_02_p.02619.02619.2	1176.625107[-0.033701];1176.636353[-0.044947];1176.497528[0.093878];1176.621262[-0.029856];1176.632507[-0.041101];1176.625122[-0.033716];1176.621292[-0.029886];1176.581528[0.009878];1176.552322[0.039084]	IDGAFVAKNSR/;GARFAGGGQKKT/;DLFQDFYET/;IDYIIGGPKMA/;DMTARVKFLP/;GNGFKRLGDTL/;MPFQDVLVTK/;VEFQDAIGWL/;LDAFRANENGA/	21.540000;20.210000;17.690000;11.950000;11.820000;11.820000;11.820000;11.820000;11.750000	0.007015;0.009528;0.017022;0.063826;0.065766;0.065766;0.065766;0.065766;0.000000	1.330000;2.520000;5.740000;0.130000;0.000000;0.000000;0.000000;0.070000;NA	0.000099972110;0.000073600177;0.000041198258;0.000010986993;0.000010662986;0.000010662986;0.000010662986;0.000010662986;0.000010492497	0.000434;0.000320;0.000179;0.000048;0.000046;0.000046;0.000046;0.000046;0.000046
query15560	816.733	2447.18	3	2447.18	-0.008248	K	VIPAADLSEQISTAGTEASGTGNMK	F			42.03	1	0	gi|00489	39.54	0.999826	37.5886	131007_Sam_Standard_03_p.03914.03914.3	2447.239975[-0.063256];2447.244476[-0.067757]	IQLDLASANVQASSMTATNLGVLM/;ASVSLKDKLNLDTQSGGKTWHY/	2.490000;0.030000	0.563638;0.540754	2.460000;NA	0.000111153802;0.000063084741	0.000483;0.000274
query6848	750.902	1499.79	2	1499.81	-0.018122	Q	TAEEALDLIVDAIK	A			64.08	1	0	gi|00924	39.36	0.999781	36.59	131007_Sam_Standard_01_p.06409.06409.2	1499.838135[-0.047999];1499.751450[0.038686];1499.844650[-0.054514];1499.798370[-0.008234];1499.798370[-0.008234];1499.819504[-0.029368];1499.834778[-0.044642];1499.819473[-0.029337];1499.826889[-0.036753]	EARMGLLDLITVGL/;TMPTAIRGTDPRAN/;VTETLKLTIPEEK/;TIAVWSILDAINNA/;FEKIPNVNGAEVAL/;EIVTSKIDLNQAVA/;SAWNTLVNLATLVV/;SALEKAQSALAELGI/;VMLALGAETLAEVIA/	24.720000;18.190000;16.670000;15.940000;14.780000;13.780000;13.500000;12.640000;12.640000	0.003373;0.015171;0.021528;0.025468;0.033266;0.041879;0.044668;0.054450;0.000000	6.530000;1.520000;0.730000;1.160000;1.000000;0.280000;0.860000;0.000000;NA	0.000115852326;0.000025757562;0.000018151176;0.000015342805;0.000011746399;0.000009330497;0.000008747919;0.000007176369;0.000007176369	0.000503;0.000112;0.000079;0.000067;0.000051;0.000041;0.000038;0.000031;0.000031
query5488	688.864	1375.71	2	1375.72	-0.002741	L	ALQEFMIAPTGAK	T			51.43	1	0	gi|00924	39.29	0.999434	32.4683	131007_Sam_Standard_02_p.03953.03953.2	1375.698380[0.015828];1375.709076[0.005132];1375.684387[0.029821];1375.712906[0.001302];1375.669144[0.045064];1375.680557[0.033651];1375.720779[-0.006571];1375.640152[0.074056];1375.694290[0.019918]	GGVVEFIDAGQVVS/;VAELMLMGLEALS/;IQAEFNQRKEN/;EARATKMVSEAIA/;RTSKDNKNDADI/;AINSDNAFALLMP/;ALGAEDYVRNLR/;QAIEKVCSDQNAA/;IAKESSLSNQTAQ/	12.140000;11.340000;10.480000;9.140000;8.160000;7.750000;7.700000;7.540000;7.290000	0.061094;0.073451;0.089536;0.121899;0.152757;0.167880;0.169824;0.176198;0.000000	0.800000;0.860000;1.340000;0.980000;0.410000;0.050000;0.160000;0.250000;NA	0.000117693891;0.000097893515;0.000080307096;0.000058986676;0.000047071054;0.000042830577;0.000042340299;0.000040808809;0.000038526000	0.000511;0.000425;0.000349;0.000256;0.000204;0.000186;0.000184;0.000177;0.000167
query2670	567.298	1132.58	2	1132.57	0.009496	S	VSEAAIEASTR	Y			70.6	1	0	gi|00330	38.85	0.999746	35.9594	131007_Sam_Standard_01_p.01775.01775.2	1132.597565[-0.015681];1132.522278[0.059606];1132.524796[0.057088];1132.562500[0.019384];1132.591019[-0.009135];1132.598419[-0.016535];1132.572403[0.009481];1132.572388[0.009496];1132.524796[0.057088]	GTEAVLKTEVS/;WEAAASIGMTP/;GETAVIENDVS/;ASEVAHQLHAA/;RMVAAELSSAV/;ALMALTGAVCLA/;LDSASALSDRV/;ARETLSASLAD/;LSVSSADGETPA/	31.750000;25.730000;25.340000;23.690000;21.440000;19.990000;19.430000;18.500000;18.330000	0.000668;0.002673;0.002924;0.004276;0.007178;0.010023;0.011402;0.014125;0.000000	6.020000;0.390000;1.650000;2.250000;1.450000;0.560000;0.930000;0.170000;NA	0.000130283636;0.000032575409;0.000029777612;0.000020365256;0.000012130812;0.000008687401;0.000007636421;0.000006164387;0.000005927750	0.000566;0.000141;0.000129;0.000088;0.000053;0.000038;0.000033;0.000027;0.000026
query8643	556.283	1665.83	3	1665.81	0.016563	Y	NAQEYYDRIPELR	Q			46.21	1	0	gi|00489	38.24	0.999442	32.5308	131007_Sam_Standard_02_p.03766.03766.3	1665.789490[0.038108];1665.886536[-0.058938];1665.872620[-0.045022];1665.846115[-0.018517];1665.793472[0.034126];1665.920197[-0.092599];1665.861374[-0.033776];1665.789459[0.038139];1665.872620[-0.045022]	GMVASQCGIPLFAPFE/;VSTPESYILAVDFLL/;YAVLEGVSFGIADGLR/;GETILYVTALQSEKD/;IAEKYCAFAPFYIM/;LAEQYQLRITLYR/;LAEKLAGDASGFLLDF/;LAEEAQMIHCIFYV/;KGQQFYGAIVASEVIG/	7.970000;6.420000;5.390000;2.660000;2.550000;2.190000;1.560000;0.970000;0.970000	0.159588;0.228034;0.289068;0.542001;0.555904;0.603949;0.698232;0.799834;0.000000	1.550000;1.030000;2.730000;0.110000;0.360000;0.630000;0.590000;0.000000;NA	0.000149884746;0.000104895640;0.000082747987;0.000044132389;0.000043028622;0.000039605677;0.000034257640;0.000029905939;0.000029905939	0.000651;0.000456;0.000359;0.000192;0.000187;0.000172;0.000149;0.000130;0.000130
query7994	807.415	1612.81	2	1612.82	-0.005976	C	AYTNHTVLPEALER	W			50.63	1	0	gi|00489	37.91	0.998995	29.9796	131007_Sam_Standard_01_p.03183.03183.2	1612.862015[-0.047099];1612.733719[0.081197];1612.901062[-0.086146];1612.791916[0.023000];1612.882462[-0.067546];1612.719147[0.095769];1612.855942[-0.041026];1612.864517[-0.049601];1612.814377[0.000539]	VLCDRTVRPYVHR/;AQVCNAAEIAMEHNL/;PVFAATLLIPCIAER/;PNMSFHLEAILGEVG/;RFLAVTVDELSVPAP/;GQIDHYLAPMPEDQ/;TAIDASEVILALAPET/;GRRSRTITVVDEQP/;APNSCRLALTHFNGL/	12.720000;12.500000;12.130000;11.750000;10.650000;10.280000;9.780000;9.720000;8.650000	0.053456;0.056234;0.061235;0.066834;0.086099;0.093756;0.105196;0.106660;0.000000	0.220000;0.370000;0.380000;1.100000;0.370000;0.500000;0.060000;1.070000;NA	0.000161645433;0.000153660924;0.000141111835;0.000129289555;0.000100360644;0.000092164451;0.000082141653;0.000081014628;0.000063323285	0.000702;0.000667;0.000613;0.000562;0.000436;0.000400;0.000357;0.000352;0.000275
query10313	614.312	1839.92	3	1839.92	-0.000221	R	VLYPNDNFFEGKELR	L			49.39	1	0	gi|00489	37.3	0.999639	34.4266	131007_Sam_Standard_01_p.04039.04039.3	1839.998856[-0.083550];1839.998871[-0.083565];1839.896240[0.019066];1839.880020[0.035286];1839.885864[0.029442];1839.908356[0.006950];1840.005386[-0.090080];1839.932617[-0.017311]	ASKALGCAGGPLREIELR/;GMVENTTLKKHATAAIR/;LDAGEEAPNKVDGEQLR/;RKDRCSKCMRGCELR/;RMENASKTALLVFCEE/;MRENSRGPQVPAGLPMT/;LTNSITEGLPREIELR/;ALLAKLEGNATGDNDNKP/	12.090000;6.930000;6.090000;1.640000;1.510000;0.620000;0.430000;0.250000	0.061802;0.202768;0.246037;0.685488;0.706318;0.866962;0.905733;0.475335	5.160000;0.840000;4.450000;0.130000;0.890000;0.190000;0.180000;NA	0.000186141519;0.000056733980;0.000046756636;0.000016781982;0.000016287081;0.000013269155;0.000012701156;0.000012185497	0.000808;0.000246;0.000203;0.000073;0.000071;0.000058;0.000055;0.000053
query2887	580.32	1158.62	2	1158.6	0.021184	R	IGSEVYHNLK	S			68	1	0	gi|00924	37.11	0.999717	35.4795	131007_Sam_Standard_02_p.01791.01791.2	1158.551651[0.072835];1158.649582[-0.025096];1158.617935[0.006551];1158.643051[-0.018565];1158.660812[-0.036326];1158.683487[-0.059001];1158.588028[0.036458];1158.614548[0.009938];1158.581528[0.042958]	IGSENAEQALQ/;VAESLTEIGKL/;IGMGVRDGGGLK/;ESGRIMIIGAI/;LGTDKGKAEKI/;IGLCFVIPGIK/;EKEVEDAARL/;LGKSRGDWLQ/;ICAVNVREQQ/	30.890000;21.220000;21.210000;18.820000;18.180000;17.430000;15.730000;15.360000;14.170000	0.000815;0.007551;0.007568;0.013122;0.015205;0.018072;0.026730;0.029107;0.000000	9.670000;0.010000;2.390000;0.640000;0.750000;1.700000;0.370000;1.190000;NA	0.000194480921;0.000020983455;0.000020935195;0.000012074718;0.000010420223;0.000008767525;0.000005927574;0.000005443485;0.000004138824	0.000845;0.000091;0.000091;0.000052;0.000045;0.000038;0.000026;0.000024;0.000018
query884	472.767	943.519	2	943.497	0.021977	R	VLGIDGGEGK	E			65.64	1	0	gi|00330	36.95	0.999615	34.1459	131007_Sam_Standard_01_p.02098.02098.2	943.501480[0.017964];943.533829[-0.014385];943.522614[-0.003170];943.558990[-0.039546];943.497452[0.021992];943.533844[-0.014400];943.533829[-0.014385];943.533829[-0.014385];943.570251[-0.050807]	VLGDLYAPP/;VLGLSKQEA/;VLGISIEDV/;VLGLLLSET/;VIGNNSIDL/;VIGIAGSLTN/;VLATLNKAD/;VLTLANSNI/;VLVVGSSVKG/	28.690000;22.030000;20.060000;20.060000;19.870000;19.220000;17.010000;17.010000;14.490000	0.001352;0.006266;0.009863;0.009863;0.010304;0.011967;0.019907;0.019907;0.000000	6.660000;1.970000;0.000000;0.190000;0.650000;2.210000;0.000000;2.520000;NA	0.000201758938;0.000043534422;0.000027658765;0.000027658765;0.000026474806;0.000022794642;0.000013703540;0.000013703540;0.000007670661	0.000876;0.000189;0.000120;0.000120;0.000115;0.000099;0.000060;0.000060;0.000033
query10902	630.318	1887.93	3	1887.92	0.011345	R	HPYFYAPELLYYANK	Y			50.28	1	0	gi|02769	36.35	0.999296	31.5239	131007_Sam_Standard_03_p.04895.04895.3	1887.947891[-0.017021];1887.961151[-0.030281];1887.999557[-0.068687];1887.962463[-0.031593];1888.027390[-0.096520];1887.984283[-0.053413];1887.915543[0.015327];1887.994171[-0.063301];1887.917404[0.013466]	FLFTDKDGEKYGRANK/;LAGLTEEAVDITMGARIE/;IFANVFSYVVFGQRNK/;NPAPDLADAMKGYRKKN/;GMSMGGLAKREIAILLTAG/;SFPRGKLNGDFPSELPK/;FIAHQYADLLEFVADH/;RTDTAILEITLEHITY/;TPSGSDATTRVDLQQAIE/	13.930000;12.020000;8.360000;7.240000;6.880000;6.860000;6.630000;6.050000;6.020000	0.040458;0.062806;0.145881;0.188799;0.205116;0.206063;0.217270;0.248313;0.000000	1.910000;3.660000;1.120000;0.360000;0.020000;0.230000;0.580000;0.030000;NA	0.000231576305;0.000149174339;0.000064223522;0.000049624269;0.000045676637;0.000045466772;0.000043121526;0.000037730636;0.000037470900	0.001006;0.000648;0.000279;0.000216;0.000198;0.000197;0.000187;0.000164;0.000163
query1341	500.796	999.577	2	999.571	0.006154	S	LVEEGAVKR	I			66.01	1	0	gi|00489	36.19	0.999302	31.5631	131007_Sam_Standard_02_p.02112.02112.2	999.582489[-0.005061];999.560059[0.017369];999.534882[0.042546];999.534912[0.042516];999.571274[0.006154];999.546112[0.031316];999.546112[0.031316];999.582504[-0.005076];999.571274[0.006154]	LVEEKRRA/;LVETIAAVGQ/;LLDENLQR/;IVENDRVVG/;IVENSIVAR/;LVEAQRER/;LVEQARER/;LVESLQRR/;VIEEGKGRL/	29.820000;25.040000;23.510000;23.370000;23.370000;23.370000;23.370000;23.370000;22.940000	0.001042;0.003133;0.004457;0.004603;0.004603;0.004603;0.004603;0.004603;0.000000	4.780000;1.530000;0.140000;0.000000;0.000000;0.000000;0.000000;0.430000;NA	0.000240268519;0.000079927618;0.000056194896;0.000054412273;0.000054412273;0.000054412273;0.000054412273;0.000054412273;0.000049282970	0.001044;0.000347;0.000244;0.000236;0.000236;0.000236;0.000236;0.000236;0.000214
query3277	601.337	1200.66	2	1200.65	0.006596	N	GTTVLVGMPAGAK	C			59.97	1	0	gi|00330	36.12	0.999296	31.5243	131007_Sam_Standard_03_p.02944.02944.2	1200.660156[0.000096];1200.723038[-0.062786];1200.694031[-0.033779];1200.715195[-0.054943];1200.707764[-0.047512];1200.646255[0.013997];1200.602631[0.057621];1200.653625[0.006627];1200.625122[0.035130]	LDASDEVIVKL/;GQAINFVLVKI/;LEWMAVIVKL/;VMLSTVVLVALG/;ASISLTQLKLQ/;TRTIVNGNEVV/;PLAYEGVLENP/;VKSMKGVLENP/;HAHATLVLDPQ/	23.850000;20.160000;20.160000;19.510000;16.040000;15.460000;14.540000;14.540000;14.460000	0.004121;0.009638;0.009638;0.011194;0.024889;0.028445;0.035156;0.035156;0.000000	3.690000;0.000000;0.650000;3.470000;0.580000;0.920000;0.000000;0.080000;NA	0.000244171038;0.000104398474;0.000104398474;0.000089886433;0.000040429107;0.000035374813;0.000028621616;0.000028621616;0.000028099213	0.001061;0.000453;0.000453;0.000390;0.000176;0.000154;0.000124;0.000124;0.000122
query10876	629.639	1885.89	3	1885.9	-0.001091	R	GYNAQEYYDRIPELR	Q			53.85	1	0	gi|00489	36	0.99963	34.3164	131007_Sam_Standard_02_p.03741.03741.3	1885.985718[-0.090981];1885.964600[-0.069863];1885.961441[-0.066704];1885.883972[0.010765];1885.925049[-0.030312];1885.964569[-0.069832];1885.983246[-0.088509];1885.976028[-0.081291];1885.971786[-0.077049]	AKANELRSGDVLAGVAAASS/;NYQQADGRIEVPEVLR/;DACGRASLCRAVAVEPIR/;DGKPVAELENNGVTNGAAM/;RRESLLCHDDKMDLR/;LEVNELRNNYQEPLR/;VSSGMLHAPQFIRQKST/;VSEFYKVISWQMTLR/;NRNIAARTAAQNALNSTT/	17.850000;9.740000;9.290000;4.220000;3.490000;2.310000;1.920000;1.850000;1.210000	0.016406;0.106170;0.117761;0.378443;0.447713;0.587489;0.642688;0.653131;0.000000	8.110000;0.450000;5.070000;0.730000;1.180000;0.390000;0.070000;0.640000;NA	0.000251095669;0.000038800670;0.000034981564;0.000010885270;0.000009201089;0.000007011957;0.000006409722;0.000006307238;0.000005443011	0.001091;0.000169;0.000152;0.000047;0.000040;0.000030;0.000028;0.000027;0.000024
query4587	434.259	1299.76	3	1299.74	0.015845	G	LAGVENVTELKK	N			51.36	1	0	gi|00489	35.94	0.998713	28.9033	131007_Sam_Standard_02_p.02715.02715.3	1299.751007[0.004630];1299.703415[0.052222];1299.783554[-0.027917];1299.722015[0.033622];1299.748520[0.007117];1299.710815[0.044822];1299.682251[0.073386];1299.678238[0.077399];1299.655807[0.099830]	AIKLSAARAADTL/;AIGVLEQQSDLK/;IAATAMASLLLLI/;LALIDKNAMAQL/;LAGKRILWNMV/;ALGVELPIMISGT/;IAREALAWIEE/;IARELNLTNEQ/;IAVGEAVDDGIEL/	15.420000;14.690000;12.980000;12.840000;12.650000;12.020000;11.220000;11.220000;10.830000	0.028708;0.033963;0.050350;0.052000;0.054325;0.062806;0.075509;0.075509;0.000000	0.730000;1.710000;0.140000;0.190000;0.630000;0.800000;0.000000;0.390000;NA	0.000254355176;0.000215001049;0.000145024234;0.000140423754;0.000134412785;0.000116262747;0.000096703141;0.000096703141;0.000088397621	0.001105;0.000934;0.000630;0.000610;0.000584;0.000505;0.000420;0.000420;0.000384
query6348	728.349	1454.68	2	1454.67	0.016057	K	YDLDFKNPNSDK	S			47.15	1	0	gi|00924	35.92	0.999131	30.6103	131007_Sam_Standard_01_p.02622.02622.2	1454.715378[-0.031566];1454.631363[0.052449];1454.617661[0.066151];1454.715561[-0.031749];1454.704147[-0.020335];1454.642593[0.041219];1454.711548[-0.027736];1454.617020[0.066792];1454.758957[-0.075145]	YDIDGAFVAKNSR/;YDNNYPEDQAVK/;SDQWWVFDIME/;LDFMEYPIPALF/;QAEGYIFQGISDK/;YDINQAESWSRS/;FKGLMDVASDIYP/;GCEVGNSVGATVCPY/;QQLQREIAERGQ/	11.230000;7.820000;6.980000;6.600000;6.580000;5.900000;5.180000;3.880000;3.120000	0.075336;0.165196;0.200447;0.218776;0.219786;0.257040;0.303389;0.409261;0.000000	3.410000;0.840000;0.380000;0.020000;0.680000;0.720000;1.300000;0.760000;NA	0.000255636271;0.000116579577;0.000096077673;0.000088028332;0.000087623879;0.000074924262;0.000063477889;0.000047056809;0.000039502308	0.001110;0.000506;0.000417;0.000382;0.000381;0.000325;0.000276;0.000204;0.000172
query1793	525.265	1048.52	2	1048.51	0.008032	L	TPDETYVPK	A			55.78	1	0	gi|02769	35.68	0.998789	29.1683	131007_Sam_Standard_02_p.03461.03461.2	1048.555298[-0.039576];1048.518936[-0.003214];1048.540054[-0.024332];1048.518921[-0.003199];1048.507675[0.008047];1048.566528[-0.050806];1048.537537[-0.021815];1048.482544[0.033178];1048.493774[0.021948]	TPEHEVLPK/;TPPLGPQDQP/;TKITDTKDQ/;TPDKAFQDK/;TPDEVYAAIA/;TPQPRPEKP/;QAQFIMSKP/;AGDSAWTLTQ/;TPDNRSVNF/	20.100000;19.540000;18.150000;17.150000;17.020000;14.940000;13.720000;13.510000;13.400000	0.009772;0.011117;0.015311;0.019275;0.019861;0.032063;0.042462;0.044566;0.000000	0.560000;1.390000;1.000000;0.130000;2.080000;1.220000;0.210000;0.110000;NA	0.000270068367;0.000237396176;0.000172374777;0.000136922153;0.000132884314;0.000082314002;0.000062154663;0.000059220725;0.000057739593	0.001173;0.001031;0.000749;0.000595;0.000577;0.000357;0.000270;0.000257;0.000251
query6437	731.885	1461.76	2	1461.74	0.020101	R	VLGIDGGEGKEELF	R			47.44	1	0	gi|00330	35.51	0.99904	30.1793	131007_Sam_Standard_03_p.04536.04536.2	1461.696045[0.059179];1461.735153[0.020071];1461.780899[-0.025675];1461.787430[-0.032206];1461.703430[0.051794];1461.721207[0.034017];1461.735794[0.019430];1461.698746[0.056478];1461.797989[-0.042765]	SNTLINQHGDINH/;AVVIDDGAFAAVVTD/;VLVWLSWHYIF/;LRECRANGGKVIF/;VVAREWERGTME/;VIGQLEHESSQHV/;VIRTSAASDARMGGA/;DGIPVSLDSYQPAT/;PDGLFAKERVALF/	11.930000;8.950000;7.530000;7.460000;6.610000;6.570000;5.430000;5.090000;4.390000	0.064121;0.127350;0.176604;0.179473;0.218273;0.220293;0.286418;0.309742;0.000000	2.980000;1.420000;0.070000;0.850000;0.040000;1.140000;0.340000;0.700000;NA	0.000280920264;0.000141443524;0.000101995983;0.000100365180;0.000082524532;0.000081767942;0.000062890213;0.000058154466;0.000049497478	0.001220;0.000614;0.000443;0.000436;0.000358;0.000355;0.000273;0.000253;0.000215
query2741	571.865	1141.72	2	1141.71	0.008397	K	KQTALVELLK	H			69.9	1	0	gi|02769	35.12	0.999512	33.114	131007_Sam_Standard_03_p.03484.03484.2	1141.754654[-0.039226];1141.678040[0.037388];1141.652893[0.062535];1141.620346[0.095082];1141.659409[0.056019];1141.718277[-0.002849];1141.631760[0.083668];1141.645508[0.069920];1141.671982[0.043446]	AGKTVKKGLIK/;IMLAIDLLLQ/;EPMGVIIQKK/;AGIDRAGNLQK/;ELDGILELIK/;KQTGKKVAIIG/;KFMHPELIK/;KKGDVIIGANQ/;KRGNQWLLK/	34.780000;29.100000;23.400000;23.090000;21.570000;21.220000;20.490000;18.960000;18.140000	0.000333;0.001230;0.004571;0.004909;0.006966;0.007551;0.008933;0.012706;0.000000	5.680000;5.700000;0.310000;1.520000;0.350000;0.730000;1.530000;0.820000;NA	0.000307459507;0.000083135771;0.000022376282;0.000020834732;0.000014682092;0.000013545278;0.000011449537;0.000008049853;0.000006664812	0.001335;0.000361;0.000097;0.000090;0.000064;0.000059;0.000050;0.000035;0.000029
query2762	573.296	1144.58	2	1144.56	0.021702	R	YEFGIFNQK	I			45.99	1	0	gi|00489	34.93	0.99843	28.0417	131007_Sam_Standard_01_p.04191.04191.2	1144.492432[0.084568];1144.518921[0.058079];1144.540039[0.036961];1144.612808[-0.035808];1144.507690[0.069310];1144.602905[-0.025905];1144.520248[0.056752];1144.624039[-0.047039];1144.551270[0.025730]	YEFEGITEGT/;YEFPQPLHD/;YSEETFTRI/;EYKLDGVKPP/;YEFDWSSIV/;YEFYRRLV/;YFERWAHH/;YEKHGGKTII/;YESNVLNHAV/	11.060000;10.990000;7.860000;7.450000;7.390000;7.390000;7.390000;6.740000;6.320000	0.078343;0.079616;0.163682;0.179887;0.182390;0.182390;0.182390;0.211836;0.000000	0.070000;3.130000;0.410000;0.060000;0.000000;0.000000;0.650000;0.420000;NA	0.000320861586;0.000315731364;0.000153574011;0.000139739031;0.000137821739;0.000137821739;0.000137821739;0.000118663656;0.000107725303	0.001394;0.001371;0.000667;0.000607;0.000599;0.000599;0.000599;0.000515;0.000468
query1509	509.769	1017.52	2	1017.49	0.034779	V	AAAFPGDVDR	L			52.04	1	0	gi|00489	34.67	0.998463	28.1343	131007_Sam_Standard_02_p.02519.02519.2	1017.549500[-0.026760];1017.462311[0.060429];1017.524338[-0.001598];1017.443695[0.079045];1017.516479[0.006261];1017.509064[0.013676];1017.491302[0.031438];1017.462784[0.059956];1017.487946[0.034794]	AAAFIPGSSVV/;AALAMGQMPE/;VNFPDRLSA/;DEANMPQTL/;LMSTQPTQL/;ASAIDEVASR/;NVALMEDRA/;DERGEAWR/;AANDSAKWGV/	17.370000;15.490000;14.750000;14.650000;14.650000;13.470000;11.960000;11.950000;11.580000	0.018323;0.028249;0.033497;0.034277;0.034277;0.044978;0.063680;0.063826;0.000000	1.880000;0.740000;0.100000;0.000000;1.180000;1.510000;0.010000;0.370000;NA	0.000340668627;0.000220969402;0.000186351177;0.000182109306;0.000182109306;0.000138781680;0.000098023937;0.000097798488;0.000089811539	0.001480;0.000960;0.000809;0.000791;0.000791;0.000603;0.000426;0.000425;0.000390
query12082	669.716	2006.13	3	2006.12	0.005591	R	LKQEYFVVAATLQDIIR	R			49.08	1	0	gi|00489	34.62	0.998687	28.8162	131007_Sam_Standard_02_p.06070.06070.3	2006.052002[0.073630];2006.171021[-0.045389];2006.079636[0.045996];2006.202682[-0.077050];2006.073761[0.051871];2006.069748[0.055884];2006.051315[0.074317];2006.185623[-0.059991];2006.057190[0.068442]	LFVRKQHGDIIIGMDHQ/;RRLLTLTNMYTKGILIT/;SYTDGLLTRAADVVLKER/;VLKPSEITPLTALKLAELA/;FLVRSDAAGAISWKKWAT/;RNPDSWLIGEGVLLPQGR/;FLVADIAQFKVTHFEEI/;TFYLFSVAAAVPGLILLLV/;IISTPTGSTAYSLSAGGPILT/	14.460000;12.890000;12.410000;12.180000;10.070000;6.830000;5.590000;5.470000;4.710000	0.035810;0.051404;0.057412;0.060534;0.098401;0.207491;0.276058;0.283792;0.000000	1.570000;0.480000;0.230000;2.110000;3.240000;1.240000;0.120000;0.760000;NA	0.000344690443;0.000240120502;0.000214995437;0.000203905642;0.000125438035;0.000059487983;0.000044712530;0.000043493989;0.000036511464	0.001497;0.001043;0.000934;0.000886;0.000545;0.000258;0.000194;0.000189;0.000159
query1636	518.277	1034.54	2	1034.54	9.7e-05	C	SDVFNQVVK	S			58.37	1	0	gi|00330	34.48	0.998851	29.3961	131007_Sam_Standard_01_p.02884.02884.2	1034.524399[0.015371];1034.564819[-0.025049];1034.539658[0.000112];1034.529083[0.010687];1034.463715[0.076055];1034.488022[0.051748];1034.598495[-0.058725];1034.554916[-0.015146];1034.583435[-0.043665]	SLTSASQDVK/;STLDVAFLLG/;SAGNAVSFVAL/;SSASRGMRAI/;MAVDAMRNGA/;SDKDSGSIVQ/;AAAKVHRVPS/;FPGFRDLLA/;QLMTIFVAL/	23.890000;23.800000;17.390000;16.680000;16.670000;16.520000;16.430000;15.380000;15.380000	0.004083;0.004169;0.018239;0.021478;0.021528;0.022284;0.022751;0.028973;0.000000	0.090000;6.410000;0.710000;0.010000;0.150000;0.090000;1.050000;0.000000;NA	0.000356041501;0.000348739085;0.000079707763;0.000067686276;0.000067530602;0.000065237998;0.000063899965;0.000050176530;0.000050176530	0.001547;0.001515;0.000346;0.000294;0.000293;0.000283;0.000278;0.000218;0.000218
query574	450.766	899.518	2	899.508	0.009923	T	PTLVEVSR	S			55.52	1	0	gi|02769	34.27	0.998797	29.1972	131007_Sam_Standard_02_p.03135.03135.2	899.423615[0.093937];899.460022[0.057530];899.459991[0.057561];899.450119[0.067433];899.450119[0.067433];899.532776[-0.015224];899.460007[0.057545];899.532761[-0.015209];899.515030[0.002522]	PTIPTENE/;PLTLDVADG/;PTIEELQA/;PTINFAHT/;PTISAQHF/;PTISLSAVI/;PTLEINVD/;PTLESKII/;PTLIMGGVI/	21.250000;16.830000;15.490000;15.490000;15.490000;15.490000;15.490000;15.490000;15.490000	0.007499;0.020749;0.028249;0.028249;0.028249;0.028249;0.028249;0.028249;0.000000	4.420000;1.340000;0.000000;0.000000;0.000000;0.000000;0.000000;0.000000;NA	0.000373660515;0.000135044595;0.000099192128;0.000099192128;0.000099192128;0.000099192128;0.000099192128;0.000099192128;0.000099192128	0.001623;0.000587;0.000431;0.000431;0.000431;0.000431;0.000431;0.000431;0.000431
query13557	541.568	2162.24	4	2162.22	0.02221	R	LKQEYFVVAATLQDIIRR	F			43.32	1	0	gi|00489	34.24	0.99805	27.0999	131007_Sam_Standard_01_p.05707.05707.4	2162.209930[0.033426];2162.217133[0.026223];2162.180740[0.062616];2162.148361[0.094995];2162.169510[0.073846];2162.173508[0.069848];2162.195969[0.047387];2162.158279[0.085077];2162.200699[0.042657]	VGRISGIAAPYAVAVLLSSYGV/;LALPGSVRNVAVLDRTKEPGA/;SYTDGLLTRAADVVLKERR/;APLLDEGILRDANGKVYYR/;IQQVLKTSLKQSFTADAER/;VSYEPILPEGIRLAYISRS/;GQSHIYKLSAALENRLHII/;VLQVPGPTGASAAPISLALNAES/;MGRFVIFRAVLEARADRR/	9.080000;8.210000;6.960000;5.810000;5.810000;5.810000;5.600000;5.600000;5.550000	0.123595;0.151008;0.201372;0.262422;0.262422;0.262422;0.275423;0.275423;0.000000	0.870000;1.250000;1.150000;0.000000;0.000000;0.210000;0.000000;0.050000;NA	0.000375969274;0.000307717612;0.000230755656;0.000177073004;0.000177073004;0.000177073004;0.000168714479;0.000168714479;0.000166783220	0.001633;0.001337;0.001002;0.000769;0.000769;0.000769;0.000733;0.000733;0.000724
query1674	519.782	1037.55	2	1037.54	0.01351	I	AGSHAVNGVAR	I			38.95	1	0	gi|00489	33.76	0.997513	26.0438	131007_Sam_Standard_01_p.03067.03067.2	1037.573044[-0.022898];1037.561768[-0.011622];1037.514160[0.035986];1037.645767[-0.095621];1037.598160[-0.048014];1037.648483[-0.098337];1037.598160[-0.048014];1037.561798[-0.011652];1037.565826[-0.015680]	TGGHLVGGKRG/;SKHTEALPR/;TNHEPTINL/;PAALKGVARR/;KHSDLVLAR/;VGAVPVAILIS/;SVLHKLDAR/;GHTGAAAAGKVV/;FAVPLQHAGV/	5.190000;4.320000;4.260000;3.470000;2.960000;2.880000;2.530000;1.760000;1.670000	0.302691;0.369828;0.374973;0.449780;0.505825;0.515229;0.558470;0.666807;0.000000	0.870000;0.060000;0.790000;0.510000;0.080000;0.350000;0.770000;0.090000;NA	0.000419680420;0.000343493646;0.000338780737;0.000282435126;0.000251141630;0.000246557778;0.000227467161;0.000190510408;0.000186603037	0.001823;0.001492;0.001472;0.001227;0.001091;0.001071;0.000988;0.000827;0.000810
query1902	530.312	1058.61	2	1058.6	0.012685	G	VENVTELKK	N			55.8	1	0	gi|00489	33.57	0.998379	27.9019	131007_Sam_Standard_01_p.02720.02720.2	1058.535629[0.074209];1058.524414[0.085424];1058.546860[0.062978];1058.633545[-0.023707];1058.524414[0.085424];1058.554260[0.055578];1058.535645[0.074193];1058.539642[0.070196];1058.560760[0.049078]	EVDKQEGRV/;VTTNATPEQV/;VERGLSQDR/;QTITIDLKK/;VEQSITTGPQ/;VTSCLVNPRA/;VENGRTTVPS/;VENHTLAYL/;VENLIENKT/	22.230000;22.210000;17.120000;16.560000;16.080000;15.920000;15.540000;15.540000;15.540000	0.005984;0.006012;0.019409;0.022080;0.024660;0.025586;0.027925;0.027925;0.000000	0.020000;5.090000;0.560000;0.480000;0.160000;0.380000;0.000000;0.000000;NA	0.000438829073;0.000436812837;0.000135299251;0.000118931088;0.000106486706;0.000102634978;0.000094036270;0.000094036270;0.000094036270	0.001906;0.001897;0.000588;0.000517;0.000462;0.000446;0.000408;0.000408;0.000408
query3485	612.8	1223.58	2	1223.57	0.016363	F	AGENFHHGDKL	X			49.24	1	0	gi|00924	33.53	0.99734	25.7513	131007_Sam_Standard_02_p.02014.02014.2	1223.579071[0.005621];1223.633224[-0.048532];1223.621994[-0.037302];1223.629868[-0.045176];1223.669617[-0.084925];1223.677475[-0.092783];1223.560471[0.024221];1223.604706[-0.020014];1223.526596[0.058096]	MKLDMSWARS/;KMSSRDFIQL/;KISCSDFLQAI/;QFASLFRDQL/;QQVMDLLHKL/;AGRPHAFVEKL/;DRTMDQAFQL/;ARYQGQNFQI/;GASNTSSTSQGDI/	15.710000;14.970000;13.970000;13.620000;13.620000;13.500000;13.230000;13.170000;13.030000	0.026853;0.031842;0.040087;0.043451;0.043451;0.044668;0.047534;0.048195;0.000000	0.740000;1.000000;0.350000;0.000000;0.120000;0.270000;0.060000;0.140000;NA	0.000442428686;0.000373115489;0.000296376168;0.000273428184;0.000273428184;0.000265976507;0.000249944323;0.000246514959;0.000238694976	0.001922;0.001621;0.001287;0.001188;0.001188;0.001155;0.001086;0.001071;0.001037
query2024	536.328	1070.64	2	1070.63	0.007543	K	EKDIVGAVLK	A			73.18	1	0	gi|00330	33.42	0.999206	31.0035	131007_Sam_Standard_02_p.02799.02799.2	1070.597168[0.043920];1070.644760[-0.003672];1070.633545[0.007543];1070.633530[0.007558];1070.633560[0.007528];1070.633575[0.007513];1070.572006[0.069082];1070.644791[-0.003703];1070.619614[0.021474]	EAGDQLVVLK/;AIRDEKVLK/;QEVEVKVKI/;EKTLLINQL/;SVSVVINIIQ/;TSPVTVQVIK/;EQDLAVGLAR/;AAQGTGVKVIK/;KRADNKVLQ/	39.760000;34.340000;30.190000;29.020000;28.170000;27.920000;27.530000;25.340000;24.970000	0.000106;0.000368;0.000957;0.001253;0.001524;0.001614;0.001766;0.002924;0.000000	5.420000;4.150000;1.170000;0.850000;0.250000;0.390000;2.190000;0.370000;NA	0.000454626942;0.000130513420;0.000050194389;0.000038340270;0.000031525005;0.000029761524;0.000027205403;0.000016430666;0.000015088816	0.001975;0.000567;0.000218;0.000167;0.000137;0.000129;0.000118;0.000071;0.000066
query1467	507.82	1013.63	2	1013.61	0.013996	K	QTALVELLK	H			69.07	1	0	gi|02769	33.15	0.998908	29.6171	131007_Sam_Standard_01_p.04262.04262.2	1013.590942[0.035130];1013.557938[0.068134];1013.539322[0.086750];1013.594315[0.031757];1013.550568[0.075504];1013.550552[0.075520];1013.696075[-0.070003];1013.554565[0.071507];1013.612076[0.013996]	KTWPEIIK/;GGDALIPMLK/;QEGVLDIIQ/;KVGEPMILK/;KDGIVQQVGA/;GAATLNVQLQ/;KTVKKGLIK/;NWLIDLAVA/;VSNLEVIKL/	35.920000;32.910000;29.190000;27.870000;25.530000;25.260000;25.050000;24.050000;24.050000	0.000256;0.000512;0.001205;0.001633;0.002799;0.002979;0.003126;0.003936;0.000000	3.010000;3.720000;1.320000;2.340000;0.270000;0.210000;1.000000;0.000000;NA	0.000483643568;0.000241838486;0.000102689353;0.000075774908;0.000044210499;0.000041545636;0.000039584523;0.000031443104;0.000031443104	0.002101;0.001050;0.000446;0.000329;0.000192;0.000180;0.000172;0.000137;0.000137
query2479	555.806	1109.6	2	1109.58	0.02123	A	PELLYYANK	Y			56.14	1	0	gi|02769	33.14	0.997967	26.9185	131007_Sam_Standard_01_p.04948.04948.2	1109.637222[-0.040324];1109.655655[-0.058757];1109.596817[0.000081];1109.633209[-0.036311];1109.546524[0.050374];1109.608078[-0.011180];1109.539337[0.057561];1109.680817[-0.083919];1109.582916[0.013982]	LIILYFSIE/;PELIKRNAIG/;PELLELTPQA/;LLILDEPLQG/;KQDDNGLLHA/;PQLGGSTIIPQ/;QDAFPVLYTG/;IIILSRGLPE/;PQNIRIGTDP/	23.000000;22.970000;22.970000;17.350000;16.370000;16.300000;16.130000;15.100000;14.480000	0.005012;0.005047;0.005047;0.018408;0.023067;0.023442;0.024378;0.030903;0.000000	0.030000;0.000000;5.620000;0.980000;0.070000;0.170000;1.030000;0.620000;NA	0.000484301874;0.000480967963;0.000480967963;0.000131860935;0.000105224325;0.000103541905;0.000099567167;0.000078544567;0.000068095145	0.002104;0.002089;0.002089;0.000573;0.000457;0.000450;0.000432;0.000341;0.000296
query303	426.233	850.452	2	850.43	0.022222	I	VGSYVGNR	A			64.35	1	0	gi|00330	32.92	0.998327	27.7649	131007_Sam_Standard_01_p.02416.02416.2	850.454880[-0.002940];850.527649[-0.075709];850.491241[-0.039301];850.429733[0.022207];850.454880[-0.002940];850.454865[-0.002925];850.418472[0.033468];850.480011[-0.028071];850.411957[0.039983]	VGIHVPET/;VGLHVTLL/;RSYVTLI/;RSQTGFGV/;VLGHVTPE/;VSYGVAQK/;DKYVQQA/;KDYVLTL/;VGFCRQAA/	31.430000;31.430000;30.620000;21.790000;20.540000;20.540000;19.400000;19.400000;18.910000	0.000719;0.000719;0.000867;0.006622;0.008831;0.008831;0.011482;0.011482;0.000000	0.000000;0.810000;8.830000;1.250000;0.000000;1.140000;0.000000;0.490000;NA	0.000509650901;0.000509650901;0.000422934191;0.000055369780;0.000041521477;0.000041521477;0.000031935432;0.000031935432;0.000028528097	0.002214;0.002214;0.001837;0.000240;0.000180;0.000180;0.000139;0.000139;0.000124
query2589	561.29	1120.56	2	1120.55	0.01328	D	GGEGKEELFR	S			48.7	1	0	gi|00330	32.87	0.997471	25.9702	131007_Sam_Standard_02_p.02603.02603.2	1120.470657[0.093893];1120.562500[0.002050];1120.562500[0.002050];1120.518921[0.045629];1120.628738[-0.064188];1120.555298[0.009252];1120.598907[-0.034357];1120.595047[-0.030497];1120.598892[-0.034342]	QDGGAEMSVID/;RSGKYPQQAS/;RSGQNIYLNG/;YEITWQGAGP/;KDRMRLFR/;KIFDPNYPQ/;SRTGDIGLFR/;QMEKYVVKP/;KSHSNPGLGKP/	15.830000;13.060000;13.060000;13.060000;13.040000;12.990000;12.580000;11.900000;11.860000	0.026122;0.049431;0.049431;0.049431;0.049659;0.050234;0.055208;0.064565;0.000000	2.770000;0.000000;0.000000;0.020000;0.050000;0.410000;0.680000;0.040000;NA	0.000515110269;0.000272207576;0.000272207576;0.000272207576;0.000270956895;0.000267855277;0.000243725072;0.000208401196;0.000206490563	0.002238;0.001182;0.001182;0.001182;0.001177;0.001163;0.001059;0.000905;0.000897
query931	474.748	947.482	2	947.46	0.021717	T	PDETYVPK	A			45.83	1	0	gi|02769	32.76	0.995989	23.9672	131007_Sam_Standard_01_p.03519.03519.2	947.515030[-0.033306];947.455978[0.025746];947.474609[0.007115];947.455978[0.025746];947.467209[0.014515];947.438202[0.043522];947.482468[-0.000744];947.471252[0.010472];947.398468[0.083256]	VLFMPVDK/;KDADSALTQ/;KDCLKVGAD/;QDSEAGKTL/;RSTENITQ/;KDNMSEPK/;ANRTDFKP/;QFTPNLQT/;QDAKWGED/	13.070000;12.990000;12.890000;12.890000;12.870000;12.260000;11.980000;10.650000;10.610000	0.049317;0.050234;0.051404;0.051404;0.051642;0.059429;0.063387;0.086099;0.000000	0.080000;0.100000;0.000000;0.020000;0.610000;0.280000;1.330000;0.040000;NA	0.000527538814;0.000517910145;0.000506121071;0.000506121071;0.000503795656;0.000437778489;0.000410444479;0.000302172139;0.000299401808	0.002292;0.002250;0.002199;0.002199;0.002189;0.001902;0.001783;0.001313;0.001300
query6888	752.311	1502.61	2	1502.59	0.017171	K	EYEATLEECCAKD	D			41.73	1	0	gi|02769	32.56	0.999064	30.286	131007_Sam_Standard_03_p.02224.02224.2	1502.638092[-0.030452];1502.693604[-0.085964];1502.637253[-0.029613];1502.641296[-0.033656];1502.652512[-0.044872];1502.707520[-0.099880]	CHAINEEMIESLD/;QMIRHETDAFGAQ/;ENTPPEENVSVSSD/;QVDPVEEPTDDYP/;EYGGKATTYEVDGN/;HIDLDLMEAQAFT/	9.170000;1.280000;0.590000;0.590000;0.190000;0.080000	0.121060;0.744732;0.872971;0.872971;0.957194;0.879023	7.890000;0.690000;0.000000;0.400000;0.110000;NA	0.000554106435;0.000090072703;0.000076841033;0.000076841033;0.000070079855;0.000068327132	0.002407;0.000391;0.000334;0.000334;0.000304;0.000297
query12836	695.03	2082.07	3	2082.06	0.011374	T	IFKDFYELEPHKFQNK	T			34.58	1	0	gi|00489	32.44	0.996998	25.2253	131007_Sam_Standard_01_p.03997.03997.3	2082.089767[-0.020959];2082.132050[-0.063242];2082.150665[-0.081857];2081.995239[0.073569];2082.161911[-0.093103];2082.144638[-0.075830];2082.136765[-0.067957]	GAKYTEAEYNWIRLKQL/;QNATRIDLSGEVPESLKIL/;GLEASPTRIEMQIATPKLK/;KMDEEHKQEFLHAVDAR/;AGKLVGDNRKVLMPTNKEI/;QQHHLALADGLRDAVGLRL/;VPNGTLRGCAASKQEGLLLR/	2.140000;1.820000;0.860000;0.300000;0.290000;0.280000;0.260000	0.610942;0.657658;0.820352;0.933254;0.935406;0.937562;0.261216	0.320000;0.960000;0.560000;0.010000;0.010000;0.020000;NA	0.000568452405;0.000528073177;0.000423344682;0.000372129507;0.000371273633;0.000370419728;0.000368717804	0.002469;0.002294;0.001839;0.001616;0.001613;0.001609;0.001602
query1936	531.784	1061.55	2	1061.54	0.011739	R	MSLVEEGAVK	R			60.4	1	0	gi|00489	32.37	0.997204	25.5345	131007_Sam_Standard_01_p.02563.02563.2	1061.623322[-0.068904];1061.506332[0.048086];1061.553894[0.000524];1061.634537[-0.080119];1061.506287[0.048131];1061.590286[-0.035868];1061.612091[-0.057673];1061.550552[0.003866];1061.539307[0.015111]	LSGARFVISL/;CPIGDVVTSTA/;MEATRAALLS/;AFLRSRLSI/;MSEAVNVIAE/;MSLLDSRKL/;LLFNVGSISL/;SRDSWVISL/;YPQENVLSI/	28.030000;27.890000;25.310000;25.310000;25.240000;23.430000;23.380000;22.710000;22.690000	0.001574;0.001626;0.002944;0.002944;0.002992;0.004539;0.004592;0.005358;0.000000	0.140000;2.580000;0.000000;0.070000;1.810000;0.050000;0.670000;0.020000;NA	0.000577808568;0.000559479242;0.000308875867;0.000308875867;0.000303937284;0.000200347523;0.000198054164;0.000169739914;0.000168960030	0.002510;0.002430;0.001342;0.001342;0.001320;0.000870;0.000860;0.000737;0.000734
query2955	582.799	1163.58	2	1163.56	0.021977	M	PYDTPVPGYR	N			56.92	1	0	gi|00489	32.17	0.99747	25.9681	131007_Sam_Standard_02_p.02438.02438.2	1163.568329[0.014775];1163.607422[-0.024318];1163.582245[0.000859];1163.618622[-0.035518];1163.618637[-0.035533];1163.561096[0.022008];1163.607407[-0.024303];1163.597534[-0.014430];1163.570999[0.012105]	GGNFTNALSQR/;LDFTGGTVIEI/;VLYTPSDKNAG/;IFDTLATAAKN/;PHIQIVTLDE/;PYSLINAWNS/;IFSQLVDEIT/;YGGAAGPVIFGVG/;YPDLDKEATI/	24.750000;22.770000;22.770000;21.060000;20.790000;20.000000;19.750000;18.520000;17.640000	0.003350;0.005284;0.005284;0.007834;0.008337;0.010000;0.010593;0.014060;0.000000	1.980000;0.000000;1.710000;0.270000;0.790000;0.250000;1.230000;0.880000;NA	0.000605201057;0.000383618619;0.000383618619;0.000258761511;0.000243164223;0.000202721438;0.000191381378;0.000144178226;0.000117733398	0.002629;0.001666;0.001666;0.001124;0.001056;0.000880;0.000831;0.000626;0.000511
query6968	756.431	1510.85	2	1510.84	0.011494	K	VPQVSTPTLVEVSR	S			42.64	1	0	gi|02769	32	0.997993	26.975	131007_Sam_Standard_03_p.03454.03454.2	1510.787903[0.059117];1510.799133[0.047887];1510.810364[0.036656];1510.902420[-0.055400];1510.835480[0.011540];1510.799133[0.047887];1510.883118[-0.036098];1510.828995[0.018025];1510.799103[0.047917]	PQVVSELDTPAAVSV/;VPQTVSGPLANSTLQ/;RAPVAAPSQSVATGTV/;KPVVRLTWGPVLF/;NLPVSQKKQDILE/;QAPTLKVQGVDLQD/;APRVLKVGIDSQKT/;ARPVAGKVIGICGDGV/;PGGIVEKEAAIQVSN/	10.640000;9.230000;6.460000;6.230000;5.420000;2.510000;0.110000;0.110000;0.110000	0.086298;0.119399;0.225944;0.238232;0.287078;0.561048;0.974990;0.974990;0.000000	1.410000;2.770000;0.230000;0.810000;2.910000;2.400000;0.000000;0.000000;NA	0.000629691157;0.000455121754;0.000240506930;0.000228101213;0.000189289966;0.000096856237;0.000055734947;0.000055734947;0.000055734947	0.002736;0.001977;0.001045;0.000991;0.000822;0.000421;0.000242;0.000242;0.000242
query3446	610.809	1219.6	2	1219.6	-0.00117	V	SVSEAAIEASTR	Y			59.54	1	0	gi|00330	31.93	0.998717	28.9189	131007_Sam_Standard_03_p.02044.02044.2	1219.630890[-0.027644];1219.644836[-0.041590];1219.520447[0.082799];1219.587326[0.015920];1219.579285[0.023961];1219.667328[-0.064082];1219.640823[-0.037577];1219.572937[0.030309];1219.542892[0.060354]	RYNELAARLD/;ASFQEALTALGI/;TGETNTDDLSPA/;WSISAWDLDK/;ADSRDLTTREG/;VSRGYLVDGRV/;VSSLSTEGATRI/;GLCLSAISCAWP/;TGEETQTANRN/	27.610000;21.830000;18.580000;18.520000;17.650000;17.650000;17.510000;17.480000;17.330000	0.001734;0.006561;0.013868;0.014060;0.017179;0.017179;0.017742;0.017865;0.000000	5.780000;3.250000;0.060000;0.870000;0.000000;0.140000;0.030000;0.150000;NA	0.000640387117;0.000169216453;0.000080064978;0.000078966445;0.000064631255;0.000064631255;0.000062581013;0.000062150208;0.000060040263	0.002782;0.000735;0.000348;0.000343;0.000281;0.000281;0.000272;0.000270;0.000261
query2090	538.306	1074.6	2	1074.59	0.004948	N	QIGTLSESIK	A			78.39	1	0	gi|00924	31.5	0.99925	31.2488	131007_Sam_Standard_02_p.02552.02552.2	1074.592087[0.004933];1074.585541[0.011479];1074.501541[0.095479];1074.519287[0.077733];1074.628448[-0.031428];1074.555679[0.041341];1074.643723[-0.046703];1074.534561[0.062459];1074.691315[-0.094295]	QGTILDTSIK/;QDRISIICK/;AGLDGAAMELQ/;AEAQLSSELQ/;AKSLLSDTLK/;QTLGEEASKL/;KITGINIGLF/;QLEDGPAAFK/;KLRIAFSLK/	46.890000;30.180000;27.250000;24.440000;24.440000;23.740000;22.910000;22.900000;22.840000	0.000020;0.000959;0.001884;0.003597;0.003597;0.004227;0.005117;0.005129;0.000000	16.710000;2.930000;2.810000;0.000000;0.700000;0.830000;0.010000;0.060000;NA	0.000707414755;0.000015089474;0.000007685535;0.000004024150;0.000004024150;0.000003425107;0.000002829268;0.000002822761;0.000002784031	0.003073;0.000066;0.000033;0.000017;0.000017;0.000015;0.000012;0.000012;0.000012
query7518	783.912	1565.81	2	1565.78	0.026465	K	DFNVGGYIQAVLDR	N			47.79	1	0	gi|00489	31.24	0.998226	27.51	131007_Sam_Standard_01_p.06339.06339.2	1565.871140[-0.060862];1565.802429[0.007849];1565.838608[-0.028330];1565.834778[-0.024500];1565.751419[0.058859];1565.896332[-0.086054];1565.841263[-0.030985];1565.740875[0.069403];1565.831406[-0.021128]	MEQARHLKGILLSA/;FGASIPKIQGMDRF/;RIRRNGILANPDGD/;KSHVEATIRNVPCL/;FTNIYNNYDKFK/;AINGIKVGLMGPLAGVG/;SSQYESALKKANLK/;AWSMPYQRAVRDS/;FALALGKNLPDDHR/	16.550000;11.760000;10.200000;9.840000;8.220000;7.650000;7.190000;6.490000;6.440000	0.022131;0.066681;0.095499;0.103753;0.150661;0.171791;0.190985;0.224388;0.000000	4.790000;1.560000;0.360000;1.620000;0.570000;0.460000;0.700000;0.050000;NA	0.000750289380;0.000249016887;0.000173871659;0.000160040095;0.000110211979;0.000096655996;0.000086941834;0.000073999502;0.000073152437	0.003260;0.001082;0.000755;0.000695;0.000479;0.000420;0.000378;0.000321;0.000318
query6802	749.404	1496.79	2	1496.84	-0.041651	K	NVPLYKHLADLSK	S			35.83	1	0	gi|00924	31.17	0.994803	22.8421	131007_Sam_Standard_01_p.03864.03864.2	1496.819839[-0.026407];1496.871506[-0.078074];1496.808609[-0.015177];1496.794693[-0.001261];1496.849701[-0.056269];1496.762344[0.031088];1496.762344[0.031088];1496.763672[0.029760];1496.767715[0.025717]	GRLPVVATLNELSE/;NVLPTRAGLVPFTL/;IPAVGAELTLADITN/;GRIPVIAGTGANATAE/;RGLPKIKTQGPSLC/;VITAWHDDNVLKS/;AAAFLTTFGSDRIQ/;RGLQVDWPHRAY/;GGVKWKYRWGFGG/	4.660000;3.830000;3.820000;3.660000;3.660000;3.260000;2.900000;2.610000;2.340000	0.341979;0.414000;0.414954;0.430527;0.430527;0.472063;0.512861;0.548277;0.000000	0.830000;0.010000;0.160000;0.000000;0.400000;0.360000;0.290000;0.270000;NA	0.000759865791;0.000627677980;0.000626234361;0.000603582852;0.000603582852;0.000550474104;0.000506683653;0.000473954764;0.000445386340	0.003301;0.002727;0.002721;0.002622;0.002622;0.002391;0.002201;0.002059;0.001935
query6710	745.395	1488.78	2	1488.76	0.014334	R	LDWDKAWEVTVK	T			64.57	1	0	gi|00489	30.48	0.999052	30.2301	131007_Sam_Standard_03_p.04484.04484.2	1488.732056[0.043554];1488.803558[-0.027948];1488.757248[0.018362];1488.746017[0.029593];1488.818771[-0.043161];1488.739456[0.036154];1488.782394[-0.006784];1488.841232[-0.065622];1488.757248[0.018362]	AKSQDKAWEEAAR/;ITSLDTPVSKTTGGL/;LDDGAPVYERGAVK/;LDQVPDEAFASKAV/;ASSTIGNYILPAVIA/;REENEAVCLWLK/;IDSSKWDVIEKGL/;KAFSERLRSSVPL/;FREAAVSPGIDTLN/	34.090000;19.560000;11.050000;10.580000;9.990000;9.500000;9.210000;8.370000;7.680000	0.000390;0.011066;0.078524;0.087498;0.100231;0.112202;0.119950;0.145546;0.000000	14.530000;8.510000;0.470000;0.590000;0.490000;0.290000;0.840000;0.690000;NA	0.000894515600;0.000031520124;0.000004442096;0.000003986465;0.000003480070;0.000003108765;0.000002907957;0.000002396558;0.000002044504	0.003887;0.000137;0.000019;0.000017;0.000015;0.000014;0.000013;0.000010;0.000009
query224	420.231	838.448	2	838.434	0.013815	E	ALDFFAR	G			56.3	1	0	gi|00330	30.45	0.996045	24.0291	131007_Sam_Standard_02_p.04254.04254.2	838.502457[-0.054911];838.440918[0.006628];838.443604[0.003942];838.375534[0.072012];838.480011[-0.032465];838.389465[0.058081];838.454849[-0.007303];838.429703[0.017843];838.466080[-0.018534]	AILPQAAR/;ALSNHAAR/;ALPEEALP/;ANNMYAR/;AIDPITLP/;AIDCAAIY/;AINQLPPS/;ALDHRID/;ALDKKHQ/	25.850000;25.850000;24.470000;22.980000;21.860000;18.640000;18.640000;18.640000;18.640000	0.002600;0.002600;0.003573;0.005035;0.006516;0.013677;0.013677;0.013677;0.000000	0.000000;1.380000;1.490000;1.120000;3.220000;0.000000;0.000000;0.000000;NA	0.000898005869;0.000898005869;0.000653550536;0.000463744931;0.000358326704;0.000170717945;0.000170717945;0.000170717945;0.000170717945	0.003902;0.003902;0.002839;0.002014;0.001556;0.000741;0.000741;0.000741;0.000741
query320	428.721	855.427	2	855.413	0.013876	L	SSGFFSPK	Q			51.5	1	0	gi|00489	30.45	0.997685	26.3538	131007_Sam_Standard_01_p.05115.05115.2	855.419876[0.006674];855.364380[0.062170];855.419876[0.006674];855.387543[0.039007];855.419876[0.006674];855.445038[-0.018488];855.397430[0.029120];855.390884[0.035666];855.416016[0.010534]	QDNAPRGV/;SSSEKMST/;ENGQPRVG/;TGDGFGFR/;SSQGPRPQ/;SSNVLVHT/;SSQVTSFT/;SSMLHGQP/;SSGIYAMK/	21.050000;14.750000;14.640000;14.640000;14.180000;13.760000;13.760000;13.660000;11.890000	0.007852;0.033497;0.034356;0.034356;0.038194;0.042073;0.042073;0.043053;0.000000	6.300000;0.110000;0.000000;0.460000;0.420000;0.000000;0.100000;1.770000;NA	0.000899483646;0.000210859548;0.000205585874;0.000205585874;0.000184923997;0.000167877801;0.000167877801;0.000164056436;0.000109142343	0.003908;0.000916;0.000893;0.000893;0.000803;0.000729;0.000729;0.000713;0.000474
query7327	776.894	1551.77	2	1551.77	0.006032	N	AQEYYDRIPELR	Q			53.08	1	0	gi|00489	30.15	0.997155	25.4587	131007_Sam_Standard_01_p.03786.03786.2	1551.750381[0.023763];1551.760254[0.013890];1551.761124[0.013020];1551.720520[0.053624];1551.827164[-0.053020];1551.848297[-0.074153];1551.793289[-0.019145];1551.782745[-0.008601];1551.829697[-0.055553]	CLYTWRDTEPLR/;CLAIIINYLSNSDN/;CALPELICRYMQL/;TDAEWLEAIDFSR/;LAWFAAFECLLLR/;LMLDQYFQLLIR/;PDTLSEYAFAGLLR/;TLALDHGKNPDCIR/;YEGAVFVTDGILLR/	22.930000;22.450000;19.100000;14.000000;13.070000;13.070000;13.070000;13.070000;13.070000	0.005093;0.005689;0.012303;0.039811;0.049317;0.049317;0.049317;0.049317;0.000000	0.480000;3.350000;5.100000;0.930000;0.000000;0.000000;0.000000;0.000000;NA	0.000963302185;0.000862506835;0.000398806791;0.000123243081;0.000099486132;0.000099486132;0.000099486132;0.000099486132;0.000099486132	0.004186;0.003747;0.001732;0.000535;0.000432;0.000432;0.000432;0.000432;0.000432
query2683	568.793	1135.57	2	1135.57	0.005422	K	GVIFYESHGK	L			47.54	1	0	gi|00330	30.03	0.997072	25.334	131007_Sam_Standard_03_p.02211.02211.2	1135.612503[-0.040873];1135.573395[-0.001765];1135.482208[0.089422];1135.587341[-0.015711];1135.642349[-0.070719];1135.638962[-0.067332];1135.625061[-0.053431];1135.562180[0.009450];1135.602585[-0.030955]	VGIFDSIATLT/;RLPEAAAGTNH/;VGPSSEPDWY/;RIFTEDGVSI/;VGLFTLISMR/;RIFFEQLAI/;RIFRFGGVNA/;RIFRIDSDD/;RLFESQLFP/	17.510000;15.730000;11.190000;10.360000;9.910000;9.900000;9.900000;9.900000;9.900000	0.017742;0.026730;0.076033;0.092045;0.102094;0.102329;0.102329;0.102329;0.000000	1.780000;4.540000;0.830000;0.450000;0.010000;0.000000;0.000000;0.000000;NA	0.000990208019;0.000657243711;0.000231060889;0.000190865063;0.000172078432;0.000171682662;0.000171682662;0.000171682662;0.000171682662	0.004303;0.002855;0.001004;0.000829;0.000747;0.000746;0.000746;0.000746;0.000746
query483	444.255	886.496	2	886.487	0.008427	L	VEEGAVKR	I			62.79	1	0	gi|00489	30.02	0.998177	27.392	131007_Sam_Standard_01_p.02099.02099.2	886.498428[-0.002788];886.407242[0.088398];886.428360[0.067280];886.498428[-0.002788];886.450821[0.044819];886.523621[-0.027981];886.523590[-0.027950];886.450821[0.044819];886.512375[-0.016735]	VEEKRAR/;VEEWDIP/;VEEPLTEA/;VEEKRRA/;VEENLRQ/;VTEGVVKR/;VEDLKKR/;VENEIQR/;VEAATLKGV/	32.770000;25.310000;24.350000;22.920000;22.900000;22.530000;21.250000;21.250000;21.180000	0.000528;0.002944;0.003673;0.005105;0.005129;0.005585;0.007499;0.007499;0.000000	7.460000;0.960000;1.430000;0.020000;0.370000;1.280000;0.000000;0.070000;NA	0.000993590742;0.000178323072;0.000142957695;0.000102850767;0.000102378211;0.000094017248;0.000070017651;0.000070017651;0.000068898146	0.004317;0.000775;0.000621;0.000447;0.000445;0.000408;0.000304;0.000304;0.000299
query1019	480.774	959.534	2	959.529	0.0053	V	ENVTELKK	N			54.56	1	0	gi|00489	30	0.993786	22.0662	131007_Sam_Standard_01_p.02722.02722.2	959.471222[0.062810];959.455978[0.078054];959.492371[0.041661];959.539993[-0.005961];959.482468[0.051564];959.471237[0.062795];959.492371[0.041661];959.539993[-0.005961];959.528748[0.005284]	KPAGYEAPQ/;EGVSAEIQQ/;KDTAGEVIQ/;QLTTTRLQ/;KDVEQWR/;AGLTPNYPQ/;AATVAEGVDK/;KDVTDRVK/;TLQEKVDK/	24.560000;24.220000;23.210000;23.050000;22.790000;22.590000;22.430000;21.460000;21.430000	0.003499;0.003784;0.004775;0.004955;0.005260;0.005508;0.005715;0.007145;0.000000	0.340000;1.010000;0.160000;0.260000;0.200000;0.160000;0.970000;0.030000;NA	0.000993785876;0.000918951985;0.000728270671;0.000701928409;0.000661139066;0.000631382907;0.000608545170;0.000486735273;0.000483384611	0.004318;0.003993;0.003164;0.003050;0.002872;0.002743;0.002644;0.002114;0.002100
query423	437.264	872.514	2	872.508	0.00649	I	LGVSLAASR	A			72.8	1	0	gi|00924	29.87	0.997123	25.41	131007_Sam_Standard_02_p.03723.03723.2	872.471558[0.042882];872.507935[0.006505];872.471558[0.042882];872.471573[0.042867];872.460358[0.054082];872.471573[0.042867];872.496735[0.017705];872.533096[-0.018656];872.423935[0.090505]	IQDLASAR/;LATALAASR/;LGVAEARAS/;IGDALTQR/;IGDALTQVG/;LGADIARGT/;VAVSALSAGV/;LDKLAKSV/;LNELAEGQ/	42.930000;41.330000;36.960000;36.830000;35.270000;35.210000;34.470000;30.970000;30.970000	0.000051;0.000074;0.000201;0.000207;0.000297;0.000301;0.000357;0.000800;0.000000	1.600000;4.370000;0.130000;1.560000;0.060000;0.740000;3.500000;0.000000;NA	0.001027421301;0.000710801876;0.000259865464;0.000252202023;0.000176095625;0.000173679502;0.000146469961;0.000065425728;0.000065425728	0.004464;0.003088;0.001129;0.001095;0.000765;0.000754;0.000636;0.000284;0.000284
query12201	673.691	2018.05	3	2018.06	-0.009896	K	LPLVGGHEGAGVVVGMGENVK	G			43.19	1	0	gi|00330	29.78	0.995255	23.2373	131007_Sam_Standard_01_p.03808.03808.3	2018.079651[-0.027627];2018.058685[-0.006661];2018.054688[-0.002663];2018.007919[0.044105];2018.127441[-0.075417];2018.077148[-0.025124];2018.069733[-0.017709];2017.979218[0.072806];2018.143829[-0.091805]	LRFKSDKLVGDLSIGDQQ/;LPIYSIGMVLAFAFISNY/;IPFFVASLILDGSATMIHS/;PLIFAMAMGKYTFGLMVE/;LDQYLLWVLCTKIQGLI/;ITAPRMTFILQGDTRWI/;LQRGNTTPYLRPAKFGAE/;LLCGHIHQELDLDWNGR/;LRFRKSDKLPNWRFR/	13.410000;12.110000;10.740000;10.490000;9.760000;8.680000;8.680000;8.430000;8.430000	0.045604;0.061518;0.084333;0.089331;0.105682;0.135519;0.135519;0.143549;0.000000	1.300000;1.370000;0.250000;0.730000;1.080000;0.000000;0.250000;0.000000;NA	0.001046969918;0.000776129523;0.000566153509;0.000534483378;0.000451787492;0.000352317490;0.000352317490;0.000332609159;0.000332609159	0.004549;0.003372;0.002459;0.002322;0.001963;0.001530;0.001530;0.001445;0.001445
query9504	585.655	1753.94	3	1753.94	0.00582	Y	YFALAHTVRDHLVGR	W			32.88	1	0	gi|00489	29.33	0.995294	23.2739	131007_Sam_Standard_02_p.04468.04468.3	1753.921051[0.022391];1753.914505[0.028937];1753.928375[0.015067];1753.995071[-0.051629];1753.941605[0.001837];1753.939621[0.003821]	PVADVLQGRVAVDSEVT/;VPNLAARGEGQIIVGCGT/;PVNALLDDAELAAMIAK/;AAKRYIRTSLKREY/;YFWPRNKKFAIER/;NVPAAIDICLIERISQ/	3.550000;2.960000;1.940000;0.720000;0.620000;0.160000	0.441570;0.505825;0.639735;0.847227;0.866962;0.119399	0.590000;1.020000;1.220000;0.100000;0.460000;NA	0.001161319166;0.001013798382;0.000801588713;0.000605273407;0.000591495702;0.000532048954	0.005046;0.004405;0.003483;0.002629;0.002570;0.002311
query4353	639.825	1277.64	2	1277.63	0.011036	V	DDEAFIRDVAK	V			50.6	1	0	gi|00489	29	0.997265	25.6301	131007_Sam_Standard_03_p.04398.04398.2	1277.647156[-0.010952];1277.600006[0.036198];1277.580902[0.055302];1277.687576[-0.051372];1277.661545[-0.025341];1277.564484[0.071720];1277.625168[0.011036];1277.571030[0.065174];1277.636429[-0.000225]	ETMLMGKGNGIK/;DDEAFRQLRE/;DDISMEKELQA/;TAMVGKLFAPIM/;KGGLSYLEAVNQ/;ETCPYCHRAKA/;NVLYETQNGIQ/;CSLEWQNTVAQ/;ITGSVDQFGRAQ/	21.600000;16.230000;15.240000;13.020000;12.960000;12.300000;11.450000;11.000000;10.650000	0.006918;0.023823;0.029923;0.049888;0.050582;0.058884;0.071614;0.079433;0.000000	5.370000;0.990000;2.220000;0.060000;0.660000;0.850000;0.450000;0.350000;NA	0.001255482006;0.000364594819;0.000290275574;0.000174104699;0.000171715893;0.000147506274;0.000121285950;0.000109347912;0.000100881259	0.005456;0.001584;0.001261;0.000756;0.000746;0.000641;0.000527;0.000475;0.000438
query4449	643.863	1285.71	2	1285.7	0.007513	K	NVNDVIAPAFVK	A			44.94	1	0	gi|00924	28.91	0.993744	22.0368	131007_Sam_Standard_03_p.03798.03798.2	1285.699020[0.011526];1285.746597[-0.036051];1285.742783[-0.032237];1285.651367[0.059179];1285.750656[-0.040110];1285.615875[0.094671];1285.699020[0.011526];1285.760529[-0.049983];1285.641510[0.069036]	TKVNVGGDRLLD/;NVLKSLARKNGS/;TLLDVILICQR/;NVNDAAAEALSIV/;GLPARHLVVIDP/;NVIPHAITSMCT/;GVGNVDSRSLVLA/;TKVNVATELKIA/;FSAHVNVGDKVN/	16.030000;15.470000;14.290000;14.220000;14.010000;10.670000;10.600000;10.140000;9.590000	0.024946;0.028379;0.037239;0.037844;0.039719;0.085704;0.087096;0.096828;0.000000	0.560000;1.180000;0.070000;0.210000;3.340000;0.070000;0.460000;0.550000;NA	0.001277245566;0.001122727612;0.000855607147;0.000841926935;0.000802184754;0.000371770053;0.000365825861;0.000329059477;0.000289917482	0.005551;0.004879;0.003717;0.003658;0.003485;0.001615;0.001589;0.001429;0.001259
query6116	716.859	1431.7	2	1431.71	-0.010188	F	YELEPHKFQNK	T			41.02	1	0	gi|00489	28.72	0.992594	21.3043	131007_Sam_Standard_03_p.02969.02969.2	1431.735794[-0.031352];1431.658981[0.045461];1431.758240[-0.053798];1431.727905[-0.023463];1431.783386[-0.078944];1431.802002[-0.097560];1431.670410[0.034032];1431.630676[0.073766];1431.699402[0.005040]	FSGNVKSQALADVP/;SNGLGRAEIESADGG/;RGSEVLRTKHYS/;IEASLTVLAEMQQ/;PRLPASILVHENS/;YKMIRRAPGIDI/;YEIQMDDAHVLV/;FPTGTAPEPEGGSW/;SQDTSIHEFIKQ/	12.300000;11.670000;11.530000;9.600000;9.430000;9.290000;9.080000;8.640000;8.250000	0.058884;0.068077;0.070307;0.109648;0.114025;0.117761;0.123595;0.136773;0.000000	0.630000;0.140000;1.930000;0.170000;0.140000;0.210000;0.440000;0.390000;NA	0.001332820710;0.001152847156;0.001116276373;0.000715767100;0.000688290432;0.000666456384;0.000634997086;0.000573814783;0.000524531691	0.005792;0.005010;0.004851;0.003110;0.002990;0.002895;0.002759;0.002493;0.002279
query11748	657.333	1968.98	3	1968.97	0.003091	I	FKDFYELEPHKFQNK	T			32.56	1	0	gi|00489	28.69	0.992508	21.2541	131007_Sam_Standard_01_p.03978.03978.3	1968.938858[0.037606];1969.060104[-0.083640];1969.055405[-0.078941];1969.052002[-0.075538];1968.959442[0.017022];1968.932983[0.043481];1969.034073[-0.057609];1969.052872[-0.076408];1969.012466[-0.036002]	ENGKVTGIVEHKDATDEQ/;QPVLGICLGMQLLGRRSE/;RDVSLVMPEQITLVELQ/;KSISATLELEVRQVYYA/;AYHIEQRAHAFPWSEK/;QEKAEFPLENVGNPFGGH/;QGAETVLQATELARAAGQR/;AMICNLAILETKSRFLF/;AKGAGLMGEAGPEAIMPLTR/	3.870000;2.790000;2.620000;1.870000;1.080000;0.740000;0.650000;0.580000;0.540000	0.410204;0.526017;0.547016;0.650130;0.779830;0.843335;0.860994;0.874984;0.000000	1.080000;0.170000;0.750000;0.790000;0.340000;0.090000;0.070000;0.040000;NA	0.001341942988;0.001046487548;0.001006315276;0.000846708784;0.000705885182;0.000652730739;0.000639343222;0.000629120831;0.000623353016	0.005832;0.004547;0.004373;0.003679;0.003067;0.002836;0.002778;0.002733;0.002708
query1781	523.784	1045.55	2	1045.52	0.033467	I	GSEVYHNLK	S			49.59	1	0	gi|00924	28.38	0.993955	22.1857	131007_Sam_Standard_01_p.01776.01776.2	1045.558990[-0.006282];1045.639633[-0.086925];1045.515213[0.037495];1045.540359[0.012349];1045.540390[0.012318];1045.592072[-0.039364];1045.511383[0.041325];1045.580811[-0.028103];1045.512741[0.039967]	ESGRIMIIGA/;RVRVYVIAA/;GSRNEEQVK/;ESGREDLLK/;SGLDTAEVVR/;RVGDFVVVVG/;EIMATQVPSA/;LLFADNVVVG/;TCNFHAVVR/	21.210000;19.000000;18.850000;18.310000;18.210000;15.350000;15.250000;15.180000;14.830000	0.007568;0.012589;0.013032;0.014757;0.015101;0.029174;0.029854;0.030339;0.000000	2.210000;0.150000;0.540000;0.100000;2.860000;0.100000;0.070000;0.350000;NA	0.001443332977;0.000867693880;0.000838236436;0.000740229748;0.000723380062;0.000374426462;0.000365903475;0.000360053083;0.000332174687	0.006273;0.003770;0.003642;0.003216;0.003143;0.001626;0.001589;0.001564;0.001443
query8683	557.291	1668.85	3	1668.85	-0.000281	K	GVIFYESHGKLEYK	D			34.17	1	0	gi|00330	28.07	0.994132	22.3154	131007_Sam_Standard_01_p.02938.02938.3	1668.931122[-0.080268];1668.872269[-0.021415];1668.914017[-0.063163];1668.883499[-0.032645];1668.851822[-0.000968];1668.927292[-0.076438];1668.844620[0.006234];1668.898788[-0.047934];1668.854507[-0.003653]	KLIFDKESHRVIGGA/;GIGAGYYNKTLDAIIT/;IRFRFFIAENLPF/;RLFTKYANGELSLTG/;HMFHKIQTQSERK/;VVVTAYYMILTRLQ/;QMLALNVNIPFSHW/;AVLQITNVFGNPFLH/;KFLPALVEATPSEHM/	6.100000;2.390000;2.130000;2.130000;1.330000;1.270000;0.910000;0.830000;0.800000	0.245471;0.576766;0.612350;0.612350;0.736207;0.746449;0.810961;0.826038;0.000000	3.710000;0.260000;0.000000;0.800000;0.060000;0.360000;0.080000;0.030000;NA	0.001550401622;0.000659848470;0.000621504409;0.000621504409;0.000516944851;0.000509852102;0.000469293149;0.000460727584;0.000457555957	0.006739;0.002867;0.002700;0.002700;0.002246;0.002215;0.002039;0.002001;0.001988
query2217	543.322	1084.63	2	1084.6	0.026325	K	EPNKFVVPR	T			50.16	1	0	gi|00489	27.9	0.992599	21.307	131007_Sam_Standard_01_p.02052.02052.2	1084.635284[-0.006038];1084.631439[-0.002193];1084.587662[0.041584];1084.635239[-0.005993];1084.624039[0.005207];1084.635284[-0.006038];1084.639328[-0.010082];1084.598892[0.030354];1084.646515[-0.017269]	DRVVIGASIR/;LNIKTMIPGV/;EIGAVEVVNR/;LARKEEAIR/;LLANGETVLR/;LGVAKQTVNR/;GVFIAGGIVPR/;AERLQVVDR/;DRVRVATLR/	22.260000;21.310000;19.400000;18.970000;18.960000;18.410000;18.310000;17.650000;14.790000	0.005943;0.007396;0.011482;0.012677;0.012706;0.014421;0.014757;0.017179;0.000000	0.950000;1.910000;0.430000;0.010000;0.550000;0.100000;0.660000;2.860000;NA	0.001609806949;0.001293521936;0.000833247075;0.000754699041;0.000752963281;0.000663397450;0.000648296681;0.000556895615;0.000288252975	0.006997;0.005621;0.003620;0.003279;0.003271;0.002882;0.002816;0.002419;0.001252
query4086	631.806	1261.6	2	1261.59	0.011463	K	VFADYEEYVK	C			44.5	1	0	gi|00489	27.79	0.994514	22.6075	131007_Sam_Standard_03_p.03496.03496.2	1261.670654[-0.072536];1261.641495[-0.043377];1261.670685[-0.072567];1261.619034[-0.020916];1261.640167[-0.042049];1261.605103[-0.006985];1261.601273[-0.003155];1261.601257[-0.003139];1261.585999[0.012119]	VFAKADLWLAE/;FVADQRGIANAT/;VFAPNVLIFDQ/;VFADGPAATETLA/;VSDETTIANIVT/;KQHDESRYVT/;MDALAPTGPVYQ/;LSLNCLWDAEV/;MSEIQLDQAID/	16.710000;14.630000;14.580000;11.390000;9.030000;8.970000;8.840000;8.320000;8.280000	0.021330;0.034435;0.034834;0.072611;0.125026;0.126765;0.130617;0.147231;0.000000	2.080000;0.050000;3.190000;2.360000;0.060000;0.130000;0.520000;0.040000;NA	0.001654287356;0.001024733538;0.001013003511;0.000485971668;0.000282235052;0.000278362642;0.000270153719;0.000239668496;0.000237471202	0.007190;0.004453;0.004402;0.002111;0.001226;0.001209;0.001173;0.001041;0.001031
query6083	714.845	1427.68	2	1427.68	-0.003459	L	NGGSHAGGALALQEF	M			48.82	1	0	gi|00924	27.66	0.996652	24.7523	131007_Sam_Standard_02_p.03844.03844.2	1427.693237[-0.017359];1427.759476[-0.083598];1427.621353[0.054525];1427.693237[-0.017359];1427.730331[-0.054453];1427.770035[-0.094157];1427.697266[-0.021388];1427.650345[0.025533];1427.617966[0.057912]	EKFSTDNAGIAYL/;YMAKILSGAARTF/;MYQLGGEPFMQQ/;YLQTSNADIYALG/;RTHQSVISDMVR/;GFYEALLVLAGYL/;YDGPIYIADAALF/;EFTQAMNGVREF/;MYQLHYFNPES/	21.160000;17.340000;11.920000;11.280000;10.180000;9.810000;9.560000;8.280000;8.080000	0.007656;0.018450;0.064269;0.074473;0.095940;0.104472;0.110662;0.148594;0.000000	3.820000;5.420000;0.640000;1.100000;0.370000;0.250000;1.280000;0.200000;NA	0.001708219166;0.000708832449;0.000203490243;0.000175607714;0.000136314982;0.000125182491;0.000118179892;0.000088012345;0.000084051137	0.007425;0.003080;0.000884;0.000763;0.000592;0.000544;0.000513;0.000382;0.000365
query1987	534.815	1067.61	2	1067.6	0.017003	N	PGLAEIIAER	I			47.49	1	0	gi|00489	27.56	0.992951	21.5187	131007_Sam_Standard_03_p.05496.05496.2	1067.597473[0.017003];1067.622650[-0.008174];1067.528748[0.085728];1067.576370[0.038106];1067.622635[-0.008159];1067.586273[0.028203];1067.597488[0.016988];1067.670258[-0.055782];1067.633881[-0.019405]	GPIEAIIEAR/;PGLAADLVLSL/;VAPAEYGKFS/;PLGAGYHIIQ/;GIPALELKEV/;PLGISSPGLID/;PIGAAKKAPDT/;PVAAKLLTAGK/;PGIVADLKAKG/	19.930000;19.170000;15.590000;15.270000;15.240000;15.100000;14.800000;14.800000;13.270000	0.010162;0.012106;0.027606;0.029717;0.029923;0.030903;0.033113;0.033113;0.000000	0.760000;3.580000;0.320000;0.030000;0.140000;0.300000;0.000000;1.530000;NA	0.001741517384;0.001461934160;0.000641103007;0.000595563144;0.000591463316;0.000572700832;0.000534475515;0.000534475515;0.000375774940	0.007570;0.006354;0.002785;0.002587;0.002569;0.002488;0.002322;0.002322;0.001632
query1227	494.78	987.545	2	987.529	0.015615	T	LPVHFYGR	V			45.89	1	0	gi|00489	27.45	0.989182	19.6587	131007_Sam_Standard_01_p.04161.04161.2	987.473373[0.071279];987.502563[0.042089];987.513763[0.030889];987.550140[-0.005488];987.466156[0.078496];987.494675[0.049977];987.546326[-0.001674];987.557541[-0.012889];987.502563[0.042089]	INQGEGTGGR/;LPVGLGGNDF/;LPERNFNV/;IPIQAAYGR/;LPVSYHEGS/;IPVDMATEL/;IPVLPFTMA/;IPVPLRYM/;IPVVDNQFG/	18.440000;17.400000;17.020000;16.770000;16.680000;15.890000;15.890000;15.890000;15.890000	0.014322;0.018197;0.019861;0.021038;0.021478;0.025763;0.025763;0.025763;0.000000	1.040000;0.380000;0.250000;0.090000;0.790000;0.000000;0.000000;0.000000;NA	0.001779411345;0.001400478207;0.001283146829;0.001211368720;0.001186523530;0.000989182342;0.000989182342;0.000989182342;0.000989182342	0.007735;0.006086;0.005576;0.005264;0.005156;0.004298;0.004298;0.004298;0.004298
query5852	706.887	1411.76	2	1411.77	-0.007121	V	PQVSTPTLVEVSR	S			55.58	1	0	gi|02769	27.1	0.997208	25.5404	131007_Sam_Standard_02_p.03148.03148.2	1411.755844[0.004140];1411.803467[-0.043483];1411.741913[0.018071];1411.796921[-0.036937];1411.719482[0.040502];1411.730713[0.029271];1411.793564[-0.033580];1411.760529[-0.000545];1411.851089[-0.091105]	PKVSLDDPEALTK/;KPVSQALNIATGLT/;PKVGNEVRNAIES/;APRSTCQLLPKAK/;PQVVSELDTPAAVS/;PQTVSGPLANSTLQ/;KPVKLASHREFT/;PRAAMEIIVAGRE/;RRVTELLSLVGLG/	28.480000;22.610000;15.590000;13.630000;12.550000;11.370000;11.270000;10.140000;10.080000	0.001419;0.005483;0.027606;0.043351;0.055590;0.072946;0.074645;0.096828;0.000000	5.870000;7.020000;1.960000;1.080000;1.180000;0.100000;1.130000;0.060000;NA	0.001944400093;0.000503252143;0.000099950652;0.000063648128;0.000049634727;0.000037825583;0.000036964568;0.000028496114;0.000028105132	0.008453;0.002186;0.000434;0.000276;0.000216;0.000164;0.000161;0.000124;0.000122
query4782	658.344	1314.67	2	1314.67	0.006368	R	VLGIDGGEGKEEL	F			37.68	1	0	gi|00330	26.82	0.991215	20.5626	131007_Sam_Standard_02_p.03441.03441.2	1314.602692[0.070378];1314.714325[-0.041255];1314.617249[0.055821];1314.678818[-0.005748];1314.588058[0.085012];1314.718353[-0.045283];1314.689163[-0.016093];1314.707794[-0.034724];1314.750717[-0.077647]	AGFSVQPLGDMHG/;LRLDKDTADAVV/;KIADCRMDNLH/;LGVLGGPDGRIMM/;QLYVAWGNYSD/;LIAYQTVGSIGPP/;VLADRDKRDDL/;LVGIQLRNNGMT/;LVIGDSVLSRGSL/	10.860000;9.710000;8.910000;8.050000;6.050000;5.630000;5.450000;4.650000;3.290000	0.082035;0.106905;0.128529;0.156675;0.248313;0.273527;0.285102;0.342768;0.000000	1.150000;0.800000;0.860000;2.000000;0.420000;0.180000;0.800000;1.360000;NA	0.002061426741;0.001581859495;0.001315733419;0.001079363942;0.000681032606;0.000618255382;0.000593154604;0.000493364510;0.000360718076	0.008962;0.006875;0.005718;0.004690;0.002959;0.002686;0.002577;0.002143;0.001567
query1951	532.784	1063.55	2	1063.54	0.015997	Q	EFMIAPTGAK	T			46.33	1	0	gi|00924	26.69	0.988401	19.3559	131007_Sam_Standard_01_p.03048.03048.2	1063.500824[0.052374];1063.482193[0.071005];1063.606613[-0.053415];1063.541031[0.012167];1063.543732[0.009466];1063.543732[0.009466];1063.627731[-0.074533];1063.525955[0.027243];1063.562347[-0.009149]	YLLMDAHTT/;DDLEALFGNA/;IFFLAQNVI/;LYNRAGAAQT/;LYILDEPTT/;YILLDEPTT/;YLLIGKIGST/;IYVPIAEEM/;YLMLSPDIL/	19.640000;19.330000;16.940000;16.860000;16.780000;16.780000;16.780000;16.650000;15.930000	0.010864;0.011668;0.020230;0.020606;0.020989;0.020989;0.020989;0.021627;0.000000	0.310000;2.390000;0.080000;0.080000;0.000000;0.000000;0.130000;0.720000;NA	0.002118035979;0.001972119981;0.001137452667;0.001116691816;0.001096309893;0.001096309893;0.001096309893;0.001063979678;0.000901432752	0.009208;0.008573;0.004943;0.004852;0.004764;0.004764;0.004764;0.004623;0.003917
query15511	610.809	2439.21	4	2439.24	-0.028875	L	KATDGGAHGVINVSVSEAAIEASTR	Y			35.91	1	0	gi|00330	26.59	0.989125	19.6358	131007_Sam_Standard_03_p.02044.02044.4	2439.258057[-0.051565];2439.235535[-0.029043];2439.133087[0.073405];2439.285126[-0.078634];2439.218231[-0.011739];2439.280670[-0.074178];2439.171509[0.034983];2439.189255[0.017237];2439.272614[-0.066122]	GTGAFATRCPIALFTDATTVGLTR/;MLGLILEPVQQALSEELFSHDA/;TGLDMASASLLDEATAAAEAMAMAK/;RQRRLFYPFSSALALFYYAA/;AWTLFRALYKGEEGAALSGDRE/;VVSSMMLGAAIGALFNGWLSFRL/;WWFRGVDMSMAVDINDIKKE/;TDRITYMAPFTNNPALANGPYL/;KSVSVMAMLGGDKRLIDAHNQAV/	9.320000;8.570000;7.930000;7.170000;6.780000;4.910000;4.300000;4.150000;4.070000	0.116950;0.138995;0.161065;0.191867;0.209894;0.322849;0.371535;0.384592;0.000000	0.750000;0.640000;0.760000;0.390000;1.870000;0.610000;0.150000;0.080000;NA	0.002168958462;0.001824951112;0.001574893661;0.001322060211;0.001208512745;0.000785690017;0.000682733534;0.000659555331;0.000647517089	0.009430;0.007933;0.006845;0.005745;0.005252;0.003414;0.002966;0.002865;0.002813
query15389	804.086	2409.24	3	2409.25	-0.011652	N	VLNGGSHAGGALALQEFMIAPTGAK	T			34.78	1	0	gi|00924	26.46	0.99002	20.0089	131007_Sam_Standard_03_p.04862.04862.3	2409.305145[-0.069345];2409.255539[-0.019739];2409.138962[0.096838];2409.206329[0.029471];2409.320877[-0.085077];2409.202316[0.033484];2409.149506[0.086294];2409.243408[-0.007608];2409.152237[0.083563]	LMLLIFYGLQIALNTVTEAMGV/;GISSGAAFGVVLMLFLVPGNAFGW/;ISYSPHYPSQGGQSTYLQLFH/;LGTAELYTNAALIAFKLDENDAG/;QRLNGITMPNNRGMVALARKLG/;TELEAINALQGTFTVSERSKES/;IFNEDNTSIAQPNRMLPHNAGA/;PGIRTVQIAGSDPKEMADAARIN/;GSLSGAAPPVIGYCAVTGEFDSGAAI/	8.320000;5.970000;5.370000;4.760000;4.450000;4.450000;4.060000;4.040000;3.920000	0.147231;0.252930;0.290402;0.334195;0.358922;0.358922;0.392645;0.394457;0.000000	2.350000;0.600000;0.610000;0.310000;0.000000;0.390000;0.020000;0.120000;NA	0.002236887602;0.001302099471;0.001134081230;0.000985471712;0.000917580472;0.000917580472;0.000838772460;0.000834918651;0.000812164799	0.009726;0.005659;0.004928;0.004282;0.003987;0.003987;0.003644;0.003628;0.003529
query2549	558.823	1115.63	2	1115.62	0.013432	A	GVENVTELKK	N			48.39	1	0	gi|00489	26.01	0.988241	19.2961	131007_Sam_Standard_01_p.02710.02710.2	1115.568329[0.063725];1115.579544[0.052510];1115.618607[0.013447];1115.629852[0.002202];1115.575684[0.056370];1115.593460[0.038594];1115.545853[0.086201];1115.586945[0.045109];1115.629837[0.002217]	VGELSGGERGR/;AGGSAKQARDR/;AGLKTELEQK/;KIASVQNTQK/;KPEEMAKQR/;AGDQGAASAIKK/;TAAGAVEEIQQ/;AAMRTSVPQR/;RSVQEKLEK/	22.380000;20.870000;20.010000;19.200000;19.140000;18.700000;18.680000;18.650000;15.970000	0.005781;0.008185;0.009977;0.012023;0.012190;0.013490;0.013552;0.013646;0.000000	1.510000;0.860000;0.810000;0.060000;0.440000;0.020000;0.030000;2.680000;NA	0.002476638729;0.001749293410;0.001435035550;0.001190865353;0.001174526067;0.001061359863;0.001056483357;0.001049210577;0.000566060251	0.010769;0.007604;0.006237;0.005175;0.005104;0.004612;0.004591;0.004559;0.002459
query726	461.756	921.498	2	921.481	0.016913	K	AEFVEVTK	L			52.71	1	0	gi|02769	26	0.988387	19.3505	131007_Sam_Standard_01_p.02147.02147.2	921.426620[0.071036];921.434464[0.063192];921.444336[0.053320];921.491989[0.005667];921.480743[0.016913];921.480759[0.016897];921.480743[0.016913];921.491974[0.005682];921.444366[0.053290]	AEVFVTCPG/;AEFVRDW/;AEFAKELD/;HPLVEVQT/;TVKVFEEA/;FSLVEVTQ/;EAVFDIKT/;AGSLFAQKT/;AEFDGALTV/	26.710000;26.430000;25.900000;25.800000;22.310000;21.240000;18.690000;18.510000;18.270000	0.002133;0.002275;0.002570;0.002630;0.005875;0.007516;0.013521;0.014093;0.000000	0.280000;0.530000;0.100000;3.490000;1.070000;2.550000;0.180000;0.240000;NA	0.002482715642;0.002327699860;0.002060283481;0.002013385703;0.000901419566;0.000704574596;0.000391676018;0.000375774219;0.000355571530	0.010796;0.010121;0.008957;0.008753;0.003917;0.003061;0.001701;0.001632;0.001545
query1734	522.302	1042.59	2	1042.58	0.004705	T	TVLVGMPAGAK	C			52.74	1	0	gi|00330	25.85	0.98954	19.8048	131007_Sam_Standard_01_p.02800.02800.2	1042.565872[0.023336];1042.522934[0.066274];1042.554642[0.034566];1042.653885[-0.064677];1042.613495[-0.024287];1042.581131[0.008077];1042.642654[-0.053446];1042.565857[0.023351];1042.581116[0.008092]	EAIVGAGTVLN/;CPLRADIAAN/;VTLEVLSEPG/;LSIVAVWKK/;SLLVGAQTVR/;SLVLIGFSAH/;SLILFALIPG/;ISLVEETRP/;LSIVQAIWN/	26.890000;24.980000;24.790000;24.270000;24.230000;19.890000;19.780000;18.950000;18.950000	0.002046;0.003177;0.003319;0.003741;0.003776;0.010257;0.010520;0.012735;0.000000	1.910000;0.190000;0.520000;0.040000;4.340000;0.110000;0.830000;0.000000;NA	0.002572962702;0.001657423494;0.001586475942;0.001407451670;0.001394548075;0.000513373552;0.000500533893;0.000413459991;0.000413459991	0.011189;0.007204;0.006895;0.006117;0.006061;0.002230;0.002174;0.001796;0.001796
query1055	482.784	963.554	2	963.539	0.014836	W	KIGDYAGIK	W			56.12	1	0	gi|00330	25.69	0.992713	21.3742	131007_Sam_Standard_02_p.01847.01847.2	963.484787[0.068959];963.586517[-0.032771];963.575317[-0.021571];963.538910[0.014836];963.538925[0.014821];963.554153[-0.000407];963.469513[0.084233];963.586517[-0.032771];963.550156[0.003590]	QIGAMFLGQ/;KLYRSLGK/;GALIVPPLQG/;QLYTAKQL/;KSTAILFGQ/;KINWYLK/;KITSAGEMQ/;KIRSYGKI/;KIDGFRKT/	30.430000;26.060000;25.280000;24.220000;24.000000;23.990000;21.360000;21.190000;20.970000	0.000906;0.002477;0.002965;0.003784;0.003981;0.003990;0.007311;0.007603;0.000000	4.370000;0.780000;1.060000;0.220000;0.010000;2.630000;0.170000;0.220000;NA	0.002678079711;0.000979091994;0.000818132225;0.000640949037;0.000609289227;0.000607887901;0.000331759600;0.000319024105;0.000303265844	0.011646;0.004254;0.003555;0.002784;0.002647;0.002641;0.001441;0.001386;0.001317
query258	423.233	844.451	2	844.429	0.021795	V	LGIDGGEGK	E			63.36	1	0	gi|00330	25.66	0.980022	16.9946	131007_Sam_Standard_02_p.02117.02117.2	844.501801[-0.050959];844.381439[0.069403];844.454208[-0.003366];844.429047[0.021795];844.469452[-0.018610];844.429062[0.021780];844.447647[0.003195];844.447678[0.003164];844.433060[0.017782]	IGIDKTKA/;IGLDDTPD/;IGLDLTVD/;IGLDQTQA/;LGIDFPLA/;IGIDVTGGN/;IGLAACLNA/;IGIGAMVGAG/;LGDLYAPP/	37.700000;37.700000;37.700000;37.700000;37.700000;36.560000;36.320000;35.340000;34.000000	0.000170;0.000170;0.000170;0.000170;0.000170;0.000221;0.000233;0.000292;0.000000	0.000000;0.000000;0.000000;0.000000;1.140000;0.240000;0.980000;1.340000;NA	0.002662171304;0.002662171304;0.002662171304;0.002662171304;0.002662171304;0.002047556987;0.001937474511;0.001546094367;0.001135627754	0.011577;0.011577;0.011577;0.011577;0.011577;0.008902;0.008423;0.006720;0.004935
query1232	495.259	988.504	2	988.498	0.006536	G	SEVYHNLK	S			46.24	1	0	gi|00924	25.01	0.984989	18.2359	131007_Sam_Standard_02_p.01793.01793.2	988.544052[-0.039744];988.507675[-0.003367];988.489929[0.014379];988.555283[-0.050975];988.507690[-0.003382];988.555298[-0.050990];988.507690[-0.003382];988.493774[0.010534];988.581772[-0.077464]	SEVSLSLIAA/;ESVAIIETQ/;DTVADPMKL/;SETAVKNLK/;DTVIPTSEK/;TDVQKASLK/;SEVLIADGSV/;TDVADGKRQ/;HPRLEPLK/	21.230000;20.380000;18.420000;18.240000;17.980000;17.960000;17.510000;16.230000;15.960000	0.007534;0.009162;0.014388;0.014997;0.015922;0.015996;0.017742;0.023823;0.000000	0.850000;1.960000;0.180000;0.260000;0.020000;0.450000;1.280000;0.270000;NA	0.003107645021;0.002555238277;0.001627164290;0.001561102447;0.001470386154;0.001463630344;0.001319566874;0.000982723643;0.000923488315	0.013517;0.011111;0.007072;0.006785;0.006391;0.006361;0.005735;0.004270;0.004013
query2373	550.773	1099.53	2	1099.52	0.012273	K	DGKYDLDFK	N			38.02	1	0	gi|00924	24.84	0.98684	18.8074	131007_Sam_Standard_01_p.02715.02715.2	1099.518600[0.012258];1099.603912[-0.073054];1099.537048[-0.006190];1099.544434[-0.013576];1099.525803[0.005055];1099.464462[0.066396];1099.566193[-0.035335];1099.478195[0.052663];1099.594742[-0.063884]	GQDYSGFTLI/;RHQWAKFK/;GDQRGDTVPR/;PDVPGSGMGRK/;QNQGIAAGTSGP/;QDGDMIFFGA/;AHKELVEFAG/;DLVTEDGNTH/;AITTVTMPLGP/	13.180000;10.520000;10.450000;9.400000;9.170000;8.630000;7.580000;7.560000;7.540000	0.048084;0.088716;0.090157;0.114815;0.121060;0.137088;0.174582;0.175388;0.000000	2.660000;0.070000;1.050000;0.230000;0.540000;1.050000;0.020000;0.020000;NA	0.003237775255;0.001754877071;0.001726818527;0.001355959442;0.001286016971;0.001135655738;0.000891757354;0.000887660101;0.000883581674	0.014084;0.007628;0.007506;0.005893;0.005589;0.004935;0.003875;0.003857;0.003839
query6336	726.864	1451.71	2	1451.71	0.005468	I	FKDFYELEPHK	F			46.18	1	0	gi|00489	24.48	0.991379	20.6444	131007_Sam_Standard_03_p.04056.04056.2	1451.723114[-0.009150];1451.672791[0.041173];1451.802399[-0.088435];1451.704483[0.009481];1451.766006[-0.052042];1451.762009[-0.048045];1451.631729[0.082235];1451.645630[0.068334];1451.641632[0.072332]	KFFDICRGLPEGA/;KCYRRAHFDAGE/;KFAGYDVIIIEGK/;QFDWNSKKVETA/;FKTPELNLFKES/;EASLHLTPTQVVSA/;QDDWTAPTFRSE/;KFDEPFSPEDIE/;SALEDEGGGVFDAVS/	21.700000;19.630000;13.440000;12.760000;12.450000;12.230000;12.090000;11.850000;11.570000	0.006761;0.010889;0.045290;0.052966;0.056885;0.059841;0.061802;0.065313;0.000000	2.070000;6.190000;0.680000;0.310000;0.220000;0.140000;0.240000;0.280000;NA	0.003533781845;0.002194015722;0.000527520978;0.000451065629;0.000419990759;0.000399245229;0.000386580315;0.000365796660;0.000342957050	0.015374;0.009539;0.002292;0.001959;0.001824;0.001734;0.001679;0.001589;0.001490
query3862	625.811	1249.61	2	1249.58	0.024388	L	GIDGGEGKEELF	R			29.32	1	0	gi|00330	24.34	0.97813	16.6015	131007_Sam_Standard_02_p.03421.03421.2	1249.634293[-0.027263];1249.509872[0.097158];1249.677872[-0.070842];1249.605118[0.001912];1249.597229[0.009801];1249.630264[-0.023234];1249.549622[0.057408];1249.681885[-0.074855];1249.664139[-0.057109]	GLDPIAQGLYGF/;QDDGAEAIPGYD/;TDARISAVRVY/;LGQTEFGGQARS/;DRATLSIAGSEM/;ADTRTALDQFI/;DKASVEGDGIME/;TWRLAIYISQ/;WTVGIRPMYK/	4.980000;4.900000;3.700000;3.190000;2.890000;2.790000;2.220000;1.670000;1.670000	0.317687;0.323594;0.426580;0.479733;0.514044;0.526017;0.599791;0.680769;0.000000	0.080000;1.200000;0.510000;0.300000;0.100000;0.570000;0.550000;0.000000;NA	0.003600780455;0.003535058805;0.002681616336;0.002384496243;0.002225341374;0.002174686420;0.001907201776;0.001680337976;0.001680337976	0.015666;0.015380;0.011662;0.010368;0.009675;0.009455;0.008291;0.007304;0.007304
query1008	478.804	955.594	2	955.56	0.033757	E	PNKFVVPR	T			42.6	1	0	gi|00489	24.31	0.979225	16.8246	131007_Sam_Standard_03_p.01999.01999.2	955.519913[0.074177];955.527954[0.066136];955.508667[0.085423];955.545059[0.049031];955.574234[0.019856];955.549088[0.045002];955.549088[0.045002];955.606598[-0.012508];955.617813[-0.023723]	PGGQDAKRK/;PNKWLWI/;PNKQVNEK/;PNKTDIRL/;PEIFKILP/;KEVLFHLA/;PNFKIQLP/;AGLEVVKLK/;KELVARIK/	18.290000;18.290000;17.760000;17.760000;16.630000;14.320000;13.760000;12.420000;12.420000	0.014825;0.014825;0.016749;0.016749;0.021727;0.036983;0.042073;0.057280;0.000000	0.000000;0.530000;0.000000;1.130000;2.310000;0.560000;1.340000;0.000000;NA	0.003629798409;0.003629798409;0.003212791232;0.003212791232;0.002476751906;0.001455065374;0.001279035227;0.000939469112;0.000939469112	0.015793;0.015793;0.013975;0.013975;0.010770;0.006324;0.005558;0.004082;0.004082
query9419	873.452	1744.89	2	1744.92	-0.028177	H	AGGALALQEFMIAPTGAK	T			32.59	1	0	gi|00924	24.25	0.979408	16.8631	131007_Sam_Standard_03_p.05220.05220.2	1744.892532[-0.002542];1744.794418[0.095572];1744.838013[0.051977];1744.878433[0.011557];1744.870575[0.019415];1744.926041[-0.036051];1744.841370[0.048620];1744.955215[-0.065225];1744.965790[-0.075800]	LAGQALEMSGMLILAMP/;GAGALALDYAFNYSTDP/;GAQIALNGQEAENQFVG/;QAGLAIPALGTTHADYF/;QQTDVSFEIIPIAMGP/;RNAVEAKGPTPALQFF/;QQALCPEKKNSTGVNE/;PIAAFVYVAIYPAITH/;QKLAFELQVRGLMNV/	8.340000;6.700000;6.700000;6.700000;5.950000;5.930000;5.290000;4.830000;4.830000	0.146555;0.213796;0.213796;0.213796;0.254097;0.255270;0.295801;0.328852;0.000000	1.640000;0.000000;0.000000;0.750000;0.020000;0.640000;0.460000;0.000000;NA	0.003680982278;0.002523270013;0.002523270013;0.002523270013;0.002123067130;0.002113312523;0.001823743372;0.001640452752;0.001640452752	0.016016;0.010972;0.010972;0.010972;0.009230;0.009188;0.007928;0.007130;0.007130
query9155	573.61	1717.81	3	1717.8	0.007728	A	AQDSFAAGWGVMVSHR	S			38.02	1	0	gi|00924	24.19	0.984721	18.1591	131007_Sam_Standard_03_p.04244.04244.3	1717.761749[0.045463];1717.847061[-0.039849];1717.884628[-0.077416];1717.757721[0.049491];1717.893341[-0.086129];1717.866882[-0.059670];1717.812714[-0.005502];1717.860535[-0.053323];1717.882111[-0.074899]	SFDTDRIDGYSPKSM/;LNGQRGEWSAKWRM/;DAIILSAVSENGSSRTV/;STIMKHSNEAGDEGSGV/;HTAGYVRAIGEAKSKM/;TLDLGERVAKACDGATV/;TADLMASLMRAHSDSI/;MKTTSLIFAFICCAGL/;DISPCRLLFLDEAAR/	13.830000;13.310000;12.710000;9.710000;7.450000;7.450000;6.660000;6.550000;6.510000	0.041400;0.046666;0.053580;0.106905;0.179887;0.179887;0.215774;0.221309;0.000000	0.520000;0.600000;3.000000;2.260000;0.000000;0.790000;0.110000;0.040000;NA	0.003752436384;0.003328996498;0.002899434741;0.001453159677;0.000863601401;0.000863601401;0.000719968239;0.000701961573;0.000695525950	0.016327;0.014482;0.012610;0.006316;0.003752;0.003752;0.003128;0.003050;0.003022
query2828	577.277	1152.54	2	1152.53	0.007817	A	GENFHHGDKL	X			34.25	1	0	gi|00924	24.18	0.979704	16.926	131007_Sam_Standard_02_p.02009.02009.2	1152.592758[-0.053722];1152.517014[0.022022];1152.578812[-0.039776];1152.513443[0.025593];1152.599976[-0.060940];1152.548508[-0.009472];1152.581512[-0.042476];1152.556381[-0.017345];1152.548477[-0.009441]	WEVLGHGDKL/;KTAFFMMMF/;WLREHGKNN/;WNFDMRER/;GSRVGQGHKDL/;KMDGDFNILT/;GFINELGYQI/;QFPPDHNLVS/;KATYCESAAPI/	10.070000;8.480000;8.240000;7.820000;7.170000;7.100000;7.080000;7.000000;6.750000	0.098401;0.141906;0.149968;0.165196;0.191867;0.194984;0.195884;0.199526;0.000000	1.590000;0.240000;0.420000;0.650000;0.070000;0.020000;0.080000;0.250000;NA	0.003741924564;0.002594747057;0.002455246089;0.002228922807;0.001919088611;0.001888404506;0.001879728075;0.001845419171;0.001742188040	0.016281;0.011283;0.010676;0.009691;0.008343;0.008209;0.008171;0.008022;0.007573
query5245	678.847	1355.68	2	1355.67	0.013708	K	SANLMAGHWVAIS	G			33.54	1	0	gi|00330	24	0.985712	18.4503	131007_Sam_Standard_01_p.04373.04373.2	1355.712555[-0.033259];1355.719772[-0.040476];1355.686737[-0.007441];1355.701981[-0.022685];1355.759491[-0.080195];1355.740845[-0.061549];1355.733643[-0.054347];1355.621811[0.057485];1355.735001[-0.055705]	LFGYTSLVWATV/;LVDPGRSGWAVTV/;QGSLFTTMKTRS/;WGAPRAPMTVAIS/;IGGIMLGLGRALGE/;ASNLRSPLVAESI/;LGYPNILEPDIL/;SAGTSFAKHHNEA/;HYAHIGKFIAVT/	9.540000;6.430000;5.970000;5.090000;4.660000;4.390000;4.340000;3.880000;1.290000	0.111173;0.227510;0.252930;0.309742;0.341979;0.363915;0.368129;0.409261;0.000000	3.110000;0.460000;0.880000;0.430000;0.270000;0.050000;0.460000;2.590000;NA	0.003924190893;0.001917565138;0.001724845204;0.001408478187;0.001275704612;0.001198809361;0.001185086704;0.001065982624;0.000587151434	0.017076;0.008336;0.007497;0.006121;0.005544;0.005209;0.005150;0.004632;0.002551
query6440	488.26	1461.76	3	1461.74	0.018806	R	PEFTLPVHFYGR	V			34.31	1	0	gi|00489	23.48	0.973783	15.8142	131007_Sam_Standard_02_p.04616.04616.3	1461.792618[-0.033318];1461.728592[0.030708];1461.782730[-0.023430];1461.793976[-0.034676];1461.819122[-0.059822];1461.753555[0.005745];1461.688843[0.070457];1461.764984[-0.005684];1461.830368[-0.071068]	IILSDTSASVSELK/;EPLTFRGVAGCELA/;LLLFTTDGELANR/;LQSVHNPVLQQLS/;IISQVAGGGVKYAIS/;ETTKGSDRITQAR/;PETFLWGGATAANQ/;LGAPVPIVGAMTEHA/;TILTIHVPSTPGRA/	10.830000;10.270000;10.270000;9.440000;8.510000;8.010000;7.810000;7.430000;7.370000	0.082604;0.093972;0.093972;0.113763;0.140929;0.158125;0.165577;0.180717;0.000000	0.560000;0.000000;0.830000;0.930000;0.500000;0.200000;0.380000;0.060000;NA	0.004369808319;0.003841159907;0.003841159907;0.003172943853;0.002561311428;0.002282771213;0.002180029584;0.001997387774;0.001969982586	0.019019;0.016714;0.016714;0.013802;0.011138;0.009925;0.009478;0.008683;0.008564
query2033	536.785	1071.56	2	1071.53	0.020497	R	EIWGVEPSR	Q			50.11	1	0	gi|00489	23.25	0.988401	19.3559	131007_Sam_Standard_02_p.03033.03033.2	1071.556015[-0.000621];1071.567230[-0.011836];1071.509262[0.046132];1071.556046[-0.000652];1071.538269[0.017125];1071.544800[0.010594];1071.544785[0.010609];1071.556000[-0.000606];1071.592422[-0.037028]	EIGERLIDQ/;ELRDAELRA/;EIMPNIPQM/;QGDQGDLVLK/;EMINVDRVP/;EQTDLGSPLI/;ELDQLDNII/;ELENVIERA/;DVVREDVIK/	26.860000;22.310000;20.850000;20.100000;19.490000;18.890000;18.340000;16.540000;16.480000	0.002061;0.005875;0.008222;0.009772;0.011246;0.012912;0.014655;0.022182;0.000000	4.550000;1.460000;0.750000;0.610000;0.600000;0.550000;1.800000;0.060000;NA	0.004676632550;0.001640337631;0.001172015211;0.000986127904;0.000856906127;0.000746334037;0.000657556762;0.000434443444;0.000428482657	0.020358;0.007130;0.005093;0.004285;0.003723;0.003242;0.002857;0.001887;0.001861
query979	477.232	952.449	2	952.429	0.019963	T	NFDAFPDK	V			45.67	1	0	gi|00489	23.06	0.981612	17.3546	131007_Sam_Standard_03_p.02768.02768.2	952.450165[-0.001155];952.407257[0.041753];952.388626[0.060384];952.450180[-0.001170];952.450165[-0.001155];952.429047[0.019963];952.432419[0.016591];952.425003[0.024007];952.491928[-0.042918]	NFLDSTEK/;NFDCRAVE/;EDNFADRS/;SKVYVDDQ/;YNVSLDDK/;NFGLYPAGD/;GFIMGADDK/;DRAYADDK/;GGFWFAIR/	22.610000;20.700000;19.280000;18.130000;17.680000;17.600000;16.750000;16.720000;14.930000	0.005483;0.008511;0.011803;0.015382;0.017061;0.017378;0.021135;0.021281;0.000000	1.910000;1.420000;1.150000;0.450000;0.080000;0.850000;0.030000;1.790000;NA	0.004852211857;0.003125645748;0.002253926526;0.001729576416;0.001559336177;0.001530875084;0.001258750786;0.001250085606;0.000827827320	0.021124;0.013596;0.009800;0.007518;0.006777;0.006654;0.005470;0.005432;0.003597
query1596	514.771	1027.53	2	1027.5	0.02477	A	GWGVMVSHR	S			48.3	1	0	gi|00924	22.89	0.992935	21.5088	131007_Sam_Standard_03_p.02479.02479.2	1027.584839[-0.057887];1027.500839[0.026113];1027.588654[-0.061702];1027.577408[-0.050456];1027.570877[-0.043925];1027.523270[0.003682];1027.560349[-0.033397];1027.554977[-0.028025];1027.518600[0.008352]	GSVRMVGIPL/;LISCPDVGQP/;KSRSVARPAG/;NERIVLER/;AQRAAMRKP/;ENRMHTIK/;GWRFLGVPP/;VLDGEITGKP/;LTSPDLTGPQ/	25.410000;13.790000;13.670000;12.280000;11.630000;11.630000;11.440000;11.230000;11.170000	0.002877;0.041783;0.042954;0.059156;0.068707;0.068707;0.071779;0.075336;0.000000	11.620000;0.120000;1.390000;0.650000;0.000000;0.190000;0.210000;0.060000;NA	0.005104118589;0.000351496299;0.000341917049;0.000248268006;0.000213757202;0.000213757202;0.000204607127;0.000194948885;0.000192274086	0.022224;0.001527;0.001485;0.001078;0.000928;0.000928;0.000889;0.000847;0.000835
query3245	599.308	1196.6	2	1196.58	0.023075	K	ATDGGAHGVINVS	V			40.71	1	0	gi|00330	22.85	0.980984	17.2087	131007_Sam_Standard_01_p.01982.01982.2	1196.655350[-0.053692];1196.550201[0.051457];1196.640091[-0.038433];1196.505768[0.095890];1196.557449[0.044209];1196.553589[0.048069];1196.626190[-0.024532];1196.561493[0.040165];1196.614960[-0.013302]	AWPIGLQLNVS/;ASPYPYSLNW/;GITPVAQALAAEG/;AIANAEHNDGAD/;QGRPVPADGDW/;IGIQYMDTAW/;GGAQAGRGQIPVS/;GVGGWFGFANVS/;VSAIHGNSGIGVS/	17.860000;17.720000;12.810000;12.710000;12.080000;11.960000;11.530000;11.420000;10.140000	0.016368;0.016904;0.052360;0.053580;0.061944;0.063680;0.070307;0.072111;0.000000	0.140000;4.910000;0.100000;0.630000;0.120000;0.430000;0.110000;1.280000;NA	0.005089343699;0.004927898806;0.001590969233;0.001554754352;0.001344812636;0.001308162758;0.001184845657;0.001155212238;0.000860323490	0.022159;0.021454;0.006915;0.006757;0.005844;0.005685;0.005149;0.005020;0.003738
query12340	678.356	2032.05	3	2032.03	0.019248	R	DYYFALAHTVRDHLVGR	W			26.39	1	0	gi|00489	22.62	0.967052	14.8217	131007_Sam_Standard_01_p.04497.04497.3	2032.092773[-0.045632];2032.127808[-0.080667];2032.107361[-0.060220];2032.016647[0.030494];2031.986984[0.060157];2032.051712[-0.004571];2031.958023[0.089118];2032.012146[0.034995];2032.132980[-0.085839]	IGKDSSVMLHLARKAFYP/;GGTLLSMLALLYVKEPAKE/;AILAFIFLGAVAISGFYPY/;WSNIRDLFEAVHATNLF/;GAAANGMSLIMLNWGGLATAN/;GSTLIQTKSNDVSIFYIF/;PRSTFAGTMLVNMAVTCYA/;GEWCIADTDLALMINRLV/;RDTKRAKLLQYAERVW/	3.770000;2.720000;2.430000;2.010000;1.950000;1.730000;1.610000;1.370000;1.370000	0.419759;0.534564;0.571479;0.629506;0.638263;0.671429;0.690240;0.729458;0.000000	1.050000;0.290000;0.420000;0.060000;0.220000;0.120000;0.240000;0.000000;NA	0.005289929860;0.004153841430;0.003885526844;0.003527361039;0.003478963831;0.003307119695;0.003216991502;0.003044036907;0.003044036907	0.023035;0.018077;0.016907;0.015346;0.015135;0.014386;0.013994;0.013240;0.013240
query915	474.247	946.479	2	946.451	0.028433	A	AAFPGDVDR	L			50.65	1	0	gi|00489	22.44	0.971195	15.4053	131007_Sam_Standard_02_p.02506.02506.2	946.471970[0.007314];946.471970[0.007314];946.471970[0.007314];946.515747[-0.036463];946.508362[-0.029078];946.515762[-0.036478];946.446823[0.032461];946.544754[-0.065470];946.491257[-0.011973]	IASDTGLDR/;ALSDGDTLR/;AATVESVDR/;MALQTLGIT/;TDARTLGIT/;ACLVTAVGLT/;NGGNTTLDR/;LRTTSVLGT/;TWALWAVT/	28.210000;26.260000;25.900000;25.730000;25.730000;25.560000;24.960000;24.390000;24.390000	0.001510;0.002366;0.002570;0.002673;0.002673;0.002780;0.003192;0.003639;0.000000	1.950000;0.360000;0.170000;0.000000;0.170000;0.600000;0.570000;0.000000;NA	0.005537405581;0.003534323791;0.003253166820;0.003128285157;0.003128285157;0.003008197418;0.002620030422;0.002297768832;0.002297768832	0.024115;0.015377;0.014151;0.013607;0.013607;0.013084;0.011394;0.009991;0.009991
query4126	632.356	1262.7	2	1262.7	-0.000285	R	QRLPAPDEKIP	-			50.67	1	0	gi|00489	22.43	0.988749	19.4881	131007_Sam_Standard_02_p.02479.02479.2	1262.607269[0.090703];1262.723419[-0.025447];1262.661896[0.036076];1262.675781[0.022191];1262.738693[-0.040721];1262.650665[0.047307];1262.723434[-0.025462];1262.723419[-0.025447];1262.705658[-0.007686]	DQLMSCLMLLP/;LKDEVLHSLLP/;QDINVAHSGLPL/;NEIPEELPLLP/;QPVLGWLLLQP/;DQVAPVAPEPIQ/;LQVPQIDLLQP/;DLILPLQNQLP/;DKILLFIRMD/	28.240000;25.700000;19.030000;16.840000;16.440000;15.290000;14.600000;14.350000;14.340000	0.001500;0.002692;0.012503;0.020701;0.022699;0.029580;0.034674;0.036728;0.000000	2.540000;6.670000;2.190000;0.400000;1.150000;0.690000;0.250000;0.010000;NA	0.005650488857;0.003148371866;0.000677775745;0.000409341732;0.000373324097;0.000286474535;0.000244391458;0.000230720414;0.000230189772	0.024609;0.013695;0.002945;0.001778;0.001622;0.001244;0.001062;0.001002;0.001000
query3624	618.836	1235.66	2	1235.65	0.01328	E	FTLPVHFYGR	V			44.09	1	0	gi|00489	22.37	0.987993	19.2056	131007_Sam_Standard_02_p.04150.04150.2	1235.571014[0.087408];1235.588120[0.070302];1235.698624[-0.040202];1235.651001[0.007421];1235.585617[0.072805];1235.695435[-0.037013];1235.658386[0.000036];1235.647156[0.011266];1235.578232[0.080190]	YTPIGYASYTT/;KSKDVDTIESD/;VLETVHVNVRA/;KQTIAHPVIDD/;EMTPVEQKQF/;TFLPPLAFALF/;PFMGVSKKLET/;PLLSFLECLTT/;WSGNLKGDSATT/	21.720000;16.000000;15.900000;13.720000;13.440000;10.880000;9.590000;9.390000;9.390000	0.006730;0.025119;0.025704;0.042462;0.045290;0.081658;0.109901;0.115080;0.000000	5.720000;0.100000;2.180000;0.280000;2.560000;1.290000;0.200000;0.000000;NA	0.005724714047;0.001533747254;0.001498834904;0.000907306032;0.000850655664;0.000471795504;0.000350553089;0.000334775601;0.000334775601	0.024934;0.006666;0.006514;0.003942;0.003696;0.002049;0.001523;0.001454;0.001454
query5343	682.867	1363.72	2	1363.72	-0.00233	N	VLNGGSHAGGALALQ	E			48.8	1	0	gi|00924	22.37	0.967563	14.8896	131007_Sam_Standard_01_p.02665.02665.2	1363.666168[0.052312];1363.782333[-0.063853];1363.772415[-0.053935];1363.771072[-0.052592];1363.789719[-0.071239];1363.720795[-0.002315];1363.782333[-0.063853];1363.786362[-0.067882];1363.753326[-0.034846]	KMGELCGMAILAQ/;NVNNVPGLLLALQ/;PRNFYSRLALK/;TEIAYNKTLAIK/;QIPLPLMQIAIGA/;LNNQGHSIGIALGA/;LPQAGQNLVLAGAI/;FFEKLAGNVVLK/;LAKQFDSLMALK/	26.430000;26.430000;26.430000;26.430000;23.050000;22.490000;22.300000;20.780000;20.650000	0.002275;0.002275;0.002275;0.002275;0.004955;0.005636;0.005888;0.008356;0.000000	0.000000;0.000000;0.000000;3.380000;0.560000;0.190000;1.520000;0.130000;NA	0.005606339316;0.005606339316;0.005606339316;0.005606339316;0.002574419873;0.002262973036;0.002166104374;0.001526438739;0.001481424011	0.024417;0.024417;0.024417;0.024417;0.011195;0.009839;0.009417;0.006634;0.006439
query14828	581.286	2321.12	4	2321.13	-0.010717	R	RHPYFYAPELLYYANKYN	G			31.64	1	0	gi|02769	22.3	0.981752	17.3878	131007_Sam_Standard_01_p.04475.04475.4	2321.111664[0.004496];2321.161316[-0.045156];2321.201569[-0.085409];2321.071289[0.044871];2321.144699[-0.028539];2321.144073[-0.027913];2321.115051[0.001109];2321.144241[-0.028081];2321.168549[-0.052389]	SEHFAEYTPWFIKPGREDL/;ILAVYYLVCVDEEVSATAHLN/;GHINITVTAGVSRAFPEEPLDV/;YFAAGNDGYLTDVALHHGTVSN/;LGQARHSNAVYQYMSEGVRR/;PADGSKDVFVHFSAIQGNGFKT/;PAFDMKQPQESKAPTWNFVT/;IAGMIAGNAMVAVGVCYNNLGQR/;QVLTQAMEDKTRGYGGQDIVL/	9.340000;5.960000;4.470000;3.460000;3.220000;2.900000;2.900000;2.510000;2.510000	0.116413;0.253513;0.357273;0.450817;0.476431;0.512861;0.512861;0.561048;0.000000	3.380000;1.490000;1.010000;0.240000;0.320000;0.000000;0.390000;0.000000;NA	0.005780984243;0.002654616476;0.001883656834;0.001492800547;0.001412543352;0.001312205294;0.001312205294;0.001199504235;0.001199504235	0.025179;0.011544;0.008188;0.006488;0.006139;0.005703;0.005703;0.005213;0.005213
query13801	546.786	2183.11	4	2183.11	0.009578	K	TIFKDFYELEPHKFQNK	T			26.53	1	0	gi|00489	22.28	0.968926	15.0761	131007_Sam_Standard_03_p.03923.03923.4	2183.194977[-0.080281];2183.138336[-0.023640];2183.192688[-0.077992];2183.087189[0.027507];2183.158585[-0.043889];2183.177933[-0.063237];2183.110992[0.003704];2183.210266[-0.095570];2183.059357[0.055339]	KEDVKQGLITYKIAAHAADL/;RMFLGFYRSKKGSMLSYL/;KLMPAFLPLVYTLTMFWL/;QDFHLRTLQASQAGAGNWAI/;GATKKAALASALGEYFERLST/;MRVCTREAPRAVGLATVPRT/;EDKLYTDFQTVLEGRKEL/;REPQFGVGVSTKYSKFIKL/;TIGTGGVAPSKEDPEALAEDNL/	4.250000;3.920000;1.660000;1.660000;1.410000;1.380000;1.000000;0.770000;0.630000	0.375837;0.405509;0.682339;0.682339;0.722770;0.727780;0.794328;0.837529;0.000000	0.330000;2.260000;0.000000;0.250000;0.030000;0.380000;0.230000;0.140000;NA	0.005731796923;0.005312400330;0.003157117860;0.003157117860;0.002980511453;0.002959993756;0.002712006930;0.002572117445;0.002490524366	0.024964;0.023133;0.013733;0.013733;0.012964;0.012874;0.011794;0.011185;0.010830
query5507	689.356	1376.7	2	1376.69	0.00353	Y	VDDEAFIRDVAK	V			35.3	1	0	gi|00489	22.12	0.97593	16.1852	131007_Sam_Standard_03_p.04688.04688.2	1376.720062[-0.022944];1376.603058[0.094060];1376.690399[0.006719];1376.727264[-0.030146];1376.685715[0.011403];1376.685715[0.011403];1376.700974[-0.003856];1376.687042[0.010076];1376.685715[0.011403]	GNSALSFLRLYH/;EMGYTHVENAGGL/;MPETMSIERRK/;ELSNYRRQGVR/;NQDTSMLTELLL/;TLDPMEDKKLTS/;ICELAKAYVGVDP/;VCNAAPAYRVKDA/;SIEEVTKLDGCIA/	13.180000;11.630000;10.960000;8.170000;7.820000;7.740000;7.720000;7.540000;7.480000	0.048084;0.068707;0.080168;0.152405;0.165196;0.168267;0.169044;0.176198;0.000000	1.550000;0.670000;2.790000;0.350000;0.080000;0.020000;0.180000;0.060000;NA	0.005989886737;0.004191974290;0.003592680613;0.001889812035;0.001743486586;0.001711664370;0.001703799986;0.001634626783;0.001612198863	0.026092;0.018244;0.015631;0.008215;0.007578;0.007440;0.007406;0.007105;0.007007
query10005	602.331	1803.97	3	1803.97	0.004983	R	YVRANGTTVLVGMPAGAK	C			38.57	1	0	gi|00330	22.1	0.975677	16.1399	131007_Sam_Standard_01_p.02957.02957.3	1803.940018[0.031502];1803.951935[0.019585];1803.977951[-0.006431];1803.984283[-0.012763];1803.959320[0.012200];1803.900284[0.071236];1804.038605[-0.067085];1803.918915[0.052605];1803.951935[0.019585]	LAEEMGVLQERITSTK/;YWTELLGVIVNVGADR/;VVMWLTLFIAREVMP/;KGSKVTDFVINRQEIA/;HAIEVPLCVISVFKYS/;DGYSLLDTPLKRTDNP/;EFILINLVVDVLYAAI/;VTELVYSLGICHREVS/;LGAGVAGGYNLAYNVAVVP/	16.470000;16.270000;13.240000;11.480000;11.230000;11.180000;10.480000;10.210000;9.740000	0.022542;0.023605;0.047424;0.071121;0.075336;0.076208;0.089536;0.095280;0.000000	0.200000;3.030000;1.760000;0.250000;0.050000;0.700000;0.270000;0.470000;NA	0.006015978217;0.005745214595;0.002859606365;0.001906804882;0.001800139887;0.001779533857;0.001514628956;0.001423332136;0.001277339243	0.026206;0.025023;0.012437;0.008289;0.007825;0.007735;0.006583;0.006186;0.005551
query8650	556.29	1665.85	3	1665.84	0.008415	K	TIFKDFYELEPHK	F			30.24	1	0	gi|00489	22.01	0.977492	16.4766	131007_Sam_Standard_01_p.04085.04085.3	1665.916183[-0.067528];1665.875977[-0.027322];1665.799850[0.048805];1665.872589[-0.023934];1665.872620[-0.023965];1665.807236[0.041419];1665.902466[-0.053811];1665.930145[-0.081490];1665.796661[0.051994]	EGPLGAARAQQNLLTK/;TEIKIDKSFVDRCL/;NVNIVGSQDGYFKPE/;VSHWLNLEEAEKVL/;TRLTNPLFTIFSQE/;WDAIGAIYLGDGSLLC/;KTFNHKQCGLPLLAP/;SVLTITSNVVYGKKTG/;WRRMLSEMSATELG/	8.230000;4.060000;4.000000;3.880000;3.440000;3.310000;3.030000;2.830000;2.790000	0.150314;0.392645;0.398107;0.409261;0.452898;0.466659;0.497737;0.521195;0.000000	4.170000;0.060000;0.120000;0.440000;0.130000;0.280000;0.200000;0.040000;NA	0.006153372333;0.002355663184;0.002323342273;0.002260024746;0.002042270172;0.001982043558;0.001858288736;0.001774651966;0.001758381859	0.026806;0.010243;0.010102;0.009826;0.008879;0.008616;0.008078;0.007714;0.007643
query5574	692.348	1382.68	2	1382.68	0.001485	K	ATDGGAHGVINVSVS	E			46.43	1	0	gi|00330	21.85	0.984129	17.994	131007_Sam_Standard_02_p.02690.02690.2	1382.715408[-0.034892];1382.595871[0.084645];1382.621017[0.059499];1382.713562[-0.033046];1382.708176[-0.027660];1382.646652[0.033864];1382.638779[0.041737];1382.676483[0.004033];1382.729309[-0.048793]	VSAIHGNSGIGVSSV/;FGSVAAISCNPCQS/;CTVSNLDKMPEF/;FLRFTTIGGWW/;ANYSIPVFISSSV/;GFSVNASVNNLFD/;ASYGMLDNDVLSV/;GKRYCGEKAWVS/;ADLKTYSVTLSVS/	24.580000;20.760000;19.390000;18.990000;16.960000;15.020000;14.140000;11.930000;11.310000	0.003483;0.008395;0.011508;0.012618;0.020137;0.031477;0.038548;0.064121;0.000000	3.820000;1.370000;0.400000;2.030000;1.940000;0.880000;2.210000;0.620000;NA	0.006427648925;0.002667178906;0.001945593684;0.001774402529;0.001111865226;0.000711298918;0.000580834157;0.000349182241;0.000302727691	0.028005;0.011599;0.008458;0.007713;0.004831;0.003090;0.002523;0.001517;0.001315
query57	407.765	813.515	2	813.496	0.019262	K	AADALLLK	V			56.64	1	0	gi|00924	21.41	0.977714	16.5198	131007_Sam_Standard_02_p.02901.02901.2	813.459595[0.055639];813.495972[0.019262];813.495987[0.019247];813.495987[0.019247];813.459595[0.055639];813.470810[0.044424];813.482040[0.033194];813.434448[0.080786];813.474854[0.040380]	AAEVALVAA/;AADALKLL/;AASVLLAVA/;AAVSLLGLA/;EAGLAIVAA/;NNALALKA/;AARNIKAA/;AAGNGALLQ/;AWLALLQ/	35.230000;35.070000;30.690000;30.690000;26.690000;26.240000;24.540000;23.740000;23.310000	0.000300;0.000311;0.000853;0.000853;0.002143;0.002377;0.003516;0.004227;0.000000	0.160000;4.380000;0.000000;4.000000;0.450000;1.700000;0.800000;0.430000;NA	0.007066625124;0.006811018394;0.002484345842;0.002484345842;0.000989035894;0.000891686216;0.000602853870;0.000501432008;0.000454163317	0.030799;0.029681;0.010803;0.010803;0.004297;0.003874;0.002619;0.002178;0.001973
query2468	555.779	1109.54	2	1109.55	-0.003001	K	ATDGGAHGVINV	S			34.75	1	0	gi|00330	21.37	0.964829	14.5381	131007_Sam_Standard_03_p.02381.02381.2	1109.605392[-0.061838];1109.557785[-0.014231];1109.587616[-0.044062];1109.630508[-0.086954];1109.571686[-0.028132];1109.619278[-0.075724];1109.557770[-0.014216];1109.601547[-0.057993];1109.612091[-0.068537]	VTGSQHLRGR/;GHGGIDTGAIGR/;GMAHRGRLNV/;LRQDPRLAAA/;ATLVDEHLVN/;LPTNPSRLAAA/;TDQHRQLVN/;AIHVMDVLRG/;LFATYAVLVN/	13.380000;11.500000;11.360000;11.360000;11.300000;10.930000;9.280000;7.490000;7.490000	0.045920;0.070795;0.073114;0.073114;0.074131;0.080724;0.118032;0.178238;0.000000	1.880000;0.140000;0.000000;0.060000;0.370000;1.650000;1.790000;0.000000;NA	0.007038014300;0.004565098419;0.004420283710;0.004420283710;0.004359635144;0.004003595062;0.002738105294;0.001813218514;0.001813218514	0.030674;0.019871;0.019240;0.019240;0.018975;0.017422;0.011908;0.007882;0.007882
query982	477.76	953.506	2	953.497	0.008976	V	IFLENYR	V			50.24	1	0	gi|00489	21.07	0.964633	14.514	131007_Sam_Standard_02_p.03839.03839.2	953.558609[-0.052593];953.533463[-0.027447];953.522217[-0.016201];953.522217[-0.016201];953.518173[-0.012157];953.489197[0.016819];953.544662[-0.038646];953.533432[-0.027416];953.544662[-0.038646]	IFKFSVLT/;LFQHPVLT/;IFLYVAQT/;LFILFTSN/;LQLPELQN/;IFMEKVST/;IFIRYSR/;IFLYTAAR/;IFSRLYR/	29.170000;29.170000;28.720000;28.200000;24.020000;22.490000;21.320000;21.320000;20.660000	0.001211;0.001211;0.001343;0.001514;0.003963;0.005636;0.007379;0.007379;0.000000	0.000000;0.450000;0.520000;4.180000;1.530000;1.170000;0.000000;0.660000;NA	0.007539837231;0.007539837231;0.006797699630;0.006030620095;0.002303360795;0.001619429218;0.001236977985;0.001236977985;0.001062580815	0.032869;0.032869;0.029623;0.026270;0.010015;0.007039;0.005375;0.005375;0.004617
query308	426.236	850.457	2	850.444	0.01331	A	EFVEVTK	L			68.22	1	0	gi|02769	20.81	0.984136	17.9959	131007_Sam_Standard_02_p.02169.02169.2	850.374222[0.082722];850.480011[-0.023067];850.443634[0.013310];850.443634[0.013310];850.407257[0.049687];850.443619[0.013325];850.443634[0.013310];850.443619[0.013325];850.382095[0.074849]	EMDEVTK/;YIVEVKT/;IYVDLTQ/;IFDEVKT/;IFDEVQT/;LYVESLQ/;YLVETVQ/;EVFELSK/;FEQAQTQ/	47.410000;46.450000;31.190000;30.840000;30.840000;30.750000;30.750000;29.540000;28.670000	0.000018;0.000023;0.000760;0.000824;0.000824;0.000841;0.000841;0.001112;0.000000	0.960000;15.260000;0.350000;0.000000;0.090000;0.000000;1.210000;0.870000;NA	0.008166861385;0.006547193619;0.000195009238;0.000179909951;0.000179909951;0.000176219995;0.000176219995;0.000133369089;0.000109157903	0.035614;0.028528;0.000847;0.000781;0.000781;0.000765;0.000765;0.000579;0.000474
query193	418.736	835.457	2	835.444	0.012746	K	IGDYAGIK	W			69.35	1	0	gi|00330	19.99	0.988984	19.5797	131007_Sam_Standard_03_p.01950.01950.2	835.418823[0.037877];835.462585[-0.005885];835.443954[0.012746];835.462585[-0.005885];835.389816[0.066884];835.426208[0.030492];835.407593[0.049107];835.502808[-0.046108];835.407578[0.049122]	LGDPHGLQ/;LGAMFGKI/;IATYQQL/;IGKMFIAG/;IGDSKMW/;IGAMFLGQ/;LGDTFVAN/;LHRLGIQ/;IGYGADLQ/	49.360000;38.680000;28.400000;26.320000;25.810000;24.630000;23.740000;20.680000;19.160000	0.000012;0.000136;0.001445;0.002333;0.002624;0.003443;0.004227;0.008551;0.000000	10.680000;10.280000;2.080000;0.510000;1.180000;0.890000;3.060000;1.520000;NA	0.009912637120;0.000847596604;0.000079467437;0.000049225395;0.000043771276;0.000033357171;0.000027176230;0.000013433501;0.000009466495	0.043265;0.003683;0.000345;0.000214;0.000190;0.000145;0.000118;0.000058;0.000041
query1070	484.757	967.5	2	967.476	0.024022	R	EALDFFAR	G			48.71	1	0	gi|00330	19.92	0.979764	16.9387	131007_Sam_Standard_02_p.04247.04247.2	967.501495[-0.001155];967.537872[-0.037532];967.479706[0.020634];967.413467[0.086873];967.533844[-0.033504];967.522583[-0.022243];967.501480[-0.001140];967.479691[0.020649];967.497482[0.002858]	SLLDFFAVG/;LSLDFVFK/;VTLDFRMS/;TPDPEPTPD/;LSIDIIGHT/;ISLEPPLEA/;EALFYQVV/;TVIDMARY/;VTLDGHEVV/	28.790000;24.790000;24.790000;16.270000;15.720000;15.370000;13.790000;12.690000;12.690000	0.001321;0.003319;0.003319;0.023605;0.026792;0.029040;0.041783;0.053827;0.000000	4.000000;0.000000;8.520000;0.550000;0.350000;1.580000;1.100000;0.000000;NA	0.009979789176;0.003973025632;0.003973025632;0.000558626285;0.000492177059;0.000454068492;0.000315588644;0.000244974775;0.000244974775	0.043559;0.017289;0.017289;0.002427;0.002138;0.001972;0.001371;0.001064;0.001064
query14233	746.021	2235.04	3	2235.03	0.007942	I	PAADLSEQISTAGTEASGTGNMK	F			26.76	1	0	gi|00489	19.83	0.957078	13.6732	131007_Sam_Standard_02_p.03961.03961.3	2235.036499[0.003929];2235.135773[-0.095345];2235.060333[-0.019905];2235.110611[-0.070183];2235.101913[-0.061485];2235.085510[-0.045082];2235.055817[-0.015389];2235.110626[-0.070198];2235.129227[-0.088799]	QYSPMSAPEGDDSLLIERDI/;ESWVMNGIVAQKQAVYVSLN/;MHGDDAPQRGDRLYVGLQHA/;NHCLTYIAKDKRDATFKPD/;GVHSSIIGLEPPQSINDGVSET/;ASRTYDAHRDGFVIAGGGGMVV/;GDLFFLPFLYGSNAGLEMTSG/;TNILHLTYRTNGSAMPFNVS/;LRTPMAIAITFYSERHINC/	6.930000;3.730000;3.610000;3.610000;3.580000;2.560000;2.560000;2.560000;2.290000	0.202768;0.423643;0.435512;0.435512;0.438531;0.554626;0.554626;0.554626;0.000000	3.200000;0.120000;0.000000;0.030000;1.020000;0.000000;0.000000;0.270000;NA	0.009952848038;0.004763732575;0.004633907637;0.004633907637;0.004602008042;0.003638709404;0.003638709404;0.003638709404;0.003419380048	0.043441;0.020738;0.020172;0.020172;0.020032;0.015832;0.015832;0.015832;0.014876
query6482	733.352	1464.69	2	1464.7	-0.010294	Y	PNDNFFEGKELR	L			28.03	1	0	gi|00489	19.78	0.961321	14.1252	131007_Sam_Standard_01_p.04045.04045.2	1464.776535[-0.087107];1464.765961[-0.076533];1464.762619[-0.073191];1464.695694[-0.006266];1464.783768[-0.094340];1464.747360[-0.057932];1464.736145[-0.046717];1464.728241[-0.038813];1464.732956[-0.043528]	ERPEPGIVFFKF/;ARNVFYPQMARL/;FWQLRFRTNTP/;HESSEKAKQHGLD/;GLRGVTFDLQGRF/;RGIGGTPIWKHDE/;NGRLFSLTVGDWT/;DIVIEMYQRGEL/;VELFLFFEFFQ/	8.250000;8.230000;4.640000;2.310000;2.010000;1.970000;1.770000;1.690000;1.680000	0.149624;0.150314;0.343558;0.587489;0.629506;0.635331;0.665273;0.677642;0.000000	0.020000;3.590000;2.330000;0.300000;0.040000;0.200000;0.080000;0.010000;NA	0.010112729915;0.010066266142;0.004404213954;0.002575540648;0.002403634387;0.002381597735;0.002274408179;0.002232895552;0.002227760034	0.044143;0.043939;0.019170;0.011200;0.010451;0.010355;0.009889;0.009708;0.009686
query6137	478.62	1432.84	3	1432.77	0.072028	K	HLVDEPQNLIKQ	N			30.38	1	0	gi|02769	19.68	0.95665	13.6301	131007_Sam_Standard_02_p.02335.02335.3	1432.759537[0.079901];1432.805130[0.034308];1432.876526[-0.037088];1432.851410[-0.011972];1432.792557[0.046881];1432.803787[0.035651];1432.760864[0.078574];1432.814529[0.024909];1432.748291[0.091147]	KKLMDSIAKGDEV/;NWHRKPGGQILK/;HAKKEIILKKEP/;HIQAVAAGKLGIKQ/;YLSVLENVLAQGK/;KHLVDEPQNLIK/;HLHTIARAAEALM/;LSCGKAELMLLKK/;CETLEEEVKIIK/	10.700000;10.560000;9.450000;5.700000;5.260000;4.690000;4.630000;4.090000;3.090000	0.085114;0.087902;0.113501;0.269153;0.297852;0.339625;0.344350;0.389942;0.000000	0.140000;1.110000;3.750000;0.440000;0.570000;0.060000;0.540000;1.000000;NA	0.010297999992;0.009971325356;0.007722410562;0.003256513532;0.002942746739;0.002580791307;0.002545381523;0.002247775261;0.001785471356	0.044956;0.043522;0.033668;0.014166;0.012799;0.011223;0.011069;0.009773;0.007761
query4223	635.342	1268.67	2	1268.65	0.017492	Y	ELEPHKFQNK	T			34.1	1	0	gi|00489	19.66	0.952866	13.2667	131007_Sam_Standard_02_p.03966.03966.2	1268.756424[-0.087626];1268.672424[-0.003626];1268.697586[-0.028788];1268.672455[-0.003657];1268.683685[-0.014887];1268.613602[0.055196];1268.756454[-0.087656];1268.629517[0.039281];1268.589798[0.079000]	ELKPRTREKL/;QNEIRSLLPEA/;ELEGKQPLDKI/;TIVGSSGHAAEIK/;KNKTIQGHKDT/;EIEPVTEQDLP/;KSRGAGIIQVGAL/;QSRMALNEAHL/;QNEDHPRVFAG/	14.440000;13.660000;11.880000;11.250000;10.650000;9.740000;9.530000;9.440000;9.330000	0.035975;0.043053;0.064863;0.074989;0.086099;0.106170;0.111429;0.113763;0.000000	0.780000;1.780000;0.630000;0.600000;0.910000;0.210000;0.090000;0.110000;NA	0.010304620017;0.008610571588;0.005715207224;0.004943470898;0.004305583160;0.003491660274;0.003326840515;0.003258606968;0.003177108027	0.044985;0.037557;0.024892;0.021522;0.018739;0.015191;0.014472;0.014175;0.013820
query250	422.26	842.505	2	842.486	0.018514	R	VLVDLER	L			48.51	1	0	gi|00489	19.46	0.918287	10.8771	131007_Sam_Standard_01_p.02798.02798.2	842.511337[-0.006663];842.474945[0.029729];842.474945[0.029729];842.490204[0.014470];842.547699[-0.043025];842.547699[-0.043025];842.511322[-0.006648];842.547699[-0.043025];842.522537[-0.017863]	VIVDVSLV/;VLVDDGLI/;VLVDTSIP/;LVVDIVW/;VILTIATI/;VILTILTA/;VITILVAD/;VLITILTA/;IVTLLER/	29.050000;29.050000;29.050000;28.620000;28.250000;28.250000;28.250000;28.250000;27.010000	0.001245;0.001245;0.001245;0.001374;0.001496;0.001496;0.001496;0.001496;0.000000	0.000000;0.000000;0.430000;0.370000;0.000000;0.000000;0.000000;1.240000;NA	0.010398690967;0.010398690967;0.010398690967;0.009418433416;0.008649254414;0.008649254414;0.008649254414;0.008649254414;0.006500977633	0.045397;0.045397;0.045397;0.041098;0.037727;0.037727;0.037727;0.037727;0.028326
query6820	500.259	1497.75	3	1497.75	0.007454	C	FLSHKDDSPDLPK	L			31.09	1	0	gi|02769	19.45	0.95159	13.1506	131007_Sam_Standard_03_p.02406.02406.3	1497.778702[-0.024895];1497.750381[0.003426];1497.767456[-0.013649];1497.782730[-0.028923];1497.808548[-0.054741];1497.756226[-0.002419];1497.735779[0.018028];1497.739822[0.013985];1497.778687[-0.024880]	NAGLRGKDTVEPLE/;KDLYQFWGDIIT/;DLRLDEPINAELT/;WGDQLLKAPQETL/;LHTIRNSLICSNK/;VADPGEIKAEDLLE/;AVLRNVCSEEHNK/;QDIHPMFLENRV/;KIENKNPGNSSPIT/	11.640000;10.660000;8.710000;7.640000;7.470000;7.420000;7.400000;6.940000;6.410000	0.068549;0.085901;0.134586;0.172187;0.179061;0.181134;0.181970;0.202302;0.000000	0.980000;1.950000;1.070000;0.170000;0.050000;0.020000;0.460000;0.530000;NA	0.010800646344;0.008618858402;0.005501102610;0.004299814756;0.004134754664;0.004087424519;0.004068644509;0.003659735896;0.003239289370	0.047162;0.037593;0.023957;0.018714;0.017994;0.017788;0.017706;0.015923;0.014091
query387	434.217	866.42	2	866.392	0.0277	I	FYESHGK	L			39.16	1	0	gi|00330	19.31	0.952995	13.2785	131007_Sam_Standard_03_p.02212.02212.2	866.376999[0.042959];866.340607[0.079351];866.402145[0.017813];866.465012[-0.045054];866.402130[0.017828];866.402130[0.017828];866.417419[0.002539];866.376999[0.042959];866.413361[0.006597]	EAAGGAAGYT/;QNGAGEYE/;SVQIEYE/;AWAKKYT/;KIADEYE/;DKALEYE/;FYEPVNV/;GKQGGEYE/;SRIAEYE/	19.850000;19.240000;16.770000;15.690000;15.110000;14.350000;14.350000;14.350000;14.350000	0.010351;0.011912;0.021038;0.026977;0.030832;0.036728;0.036728;0.036728;0.000000	0.610000;2.470000;1.080000;0.580000;0.760000;0.000000;0.000000;0.000000;NA	0.011170961474;0.009707123478;0.005496554697;0.004286378857;0.003750511954;0.003148404714;0.003148404714;0.003148404714;0.003148404714	0.048788;0.042363;0.023937;0.018656;0.016319;0.013695;0.013695;0.013695;0.013695
query7110	509.293	1524.86	3	1524.83	0.025353	K	NFNRHLHFTLVK	D			31.61	1	0	gi|00489	19.28	0.96545	14.6156	131007_Sam_Standard_02_p.02683.02683.3	1524.909973[-0.053260];1524.896072[-0.039359];1524.764450[0.092263];1524.775864[0.080849];1524.852478[0.004235];1524.837189[0.019524];1524.826004[0.030709];1524.862396[-0.005683];1524.873596[-0.016883]	AIQSRLLAISRAVQ/;KVNKRVGRRDAVQ/;SLGHKIQDNRTEQ/;FALAKAAMFNNTVQ/;GRIARDLTHFIIN/;RLGINDLNAEAIAR/;QLVSLQTQPERVQ/;LIIGGSAGLIGGRVDQ/;QVIVQKVREAERA/	12.330000;7.510000;6.560000;6.490000;6.320000;6.320000;6.160000;5.720000;5.670000	0.058479;0.177419;0.220800;0.224388;0.233346;0.233346;0.242103;0.267917;0.000000	4.820000;0.950000;0.070000;0.170000;0.000000;0.160000;0.440000;0.050000;NA	0.011395409892;0.003756037775;0.003018074468;0.002969818794;0.002855814217;0.002855814217;0.002752516629;0.002487310203;0.002458838198	0.049774;0.016343;0.013127;0.012917;0.012420;0.012420;0.011971;0.010816;0.010692
query1633	517.761	1033.51	2	1033.5	0.003941	V	SEAAIEASTR	Y			65.39	1	0	gi|00330	19.26	0.986687	18.7572	131007_Sam_Standard_01_p.01794.01794.2	1033.471619[0.036289];1033.529999[-0.022091];1033.592010[-0.084102];1033.504837[0.003071];1033.592010[-0.084102];1033.503998[0.003910];1033.544388[-0.036480];1033.492752[0.015156];1033.533844[-0.025936]	DTAALAEWSA/;LCAALAATMGL/;HPKIAEAAVV/;CIAMEAGALR/;TDAAFLKRI/;DTRVISEGAS/;ASEAILFING/;GETAILETSN/;MRAIATRDT/	46.130000;36.310000;29.700000;21.270000;21.270000;16.650000;16.490000;16.490000;16.490000	0.000024;0.000234;0.001072;0.007464;0.007464;0.021627;0.022439;0.022439;0.000000	9.820000;6.610000;8.430000;0.000000;4.620000;0.160000;0.000000;0.000000;NA	0.011699823243;0.001219492969;0.000266182378;0.000038210199;0.000038210199;0.000013188011;0.000012710988;0.000012710988;0.000012710988	0.051111;0.005299;0.001156;0.000166;0.000166;0.000057;0.000055;0.000055;0.000055
query6022	712.868	1423.72	2	1423.73	-0.008693	R	SIVPSGASTGVHEAL	E			36.61	1	0	gi|00924	19.17	0.963118	14.3318	131007_Sam_Standard_02_p.03198.03198.2	1423.741928[-0.019908];1423.669159[0.052861];1423.673187[0.048833];1423.644196[0.077824];1423.775146[-0.053126];1423.757187[-0.035167];1423.728195[-0.006175];1423.759857[-0.037837];1423.698334[0.023686]	AEVIAGGDVPNLNR/;EAVNGETQQAHLQ/;YGQITYSQSIHQ/;SLVTYFPESNHM/;WIGLEITLFSVF/;WLTSHNDLGIIR/;FHNCTPIQALALP/;AEVAILASLYDFI/;SLVSQPKNFEFE/	17.440000;14.060000;13.880000;13.280000;11.690000;10.270000;9.710000;8.500000;8.430000	0.018030;0.039264;0.040926;0.046989;0.067764;0.093972;0.106905;0.141254;0.000000	3.380000;0.180000;0.600000;1.590000;1.420000;0.560000;1.210000;0.070000;NA	0.011659482939;0.005354011396;0.005136641915;0.004473828082;0.003102267844;0.002237068545;0.001966433623;0.001488261651;0.001464465993	0.050934;0.023315;0.022366;0.019473;0.013494;0.009726;0.008549;0.006468;0.006365

## Sheet: CS_NES_210
Table S-2. (Peptides Identified by CS in NES search)
Query Number	Observed m/z	Observed MW	Observed Charge State	Theoretical MW	MW Error	Residue Before	Seq	Residue After	Modification	Mod Location	Mascot Score	Unique	Missed Cleavage	Accession	DS	Contribution Fraction C1	CS	Title	Subranked Theoretical MW[Error]	Subranked Seq/Mod[Loc]	Subranked Mascot Scores	Subranked Random Matched Probabilities	Subranked MDScores	Subranked Contibution Fractions	Subranked Contribution Scores
query7251	771.371	1540.73	2	1540.73	-0.002985	V	PSGASTGVHEALEMR	D			128.56	1	0	gi|00924	115.98	1	110.726	131007_Sam_Standard_03_p.03486.03486.2	1540.784546[-0.057154];1540.756866[-0.029474];1540.806961[-0.079569];1540.811035[-0.083643];1540.811005[-0.083613];1540.719818[0.007574];1540.762054[-0.034662];1540.736893[-0.009501];1540.751678[-0.024286]	GVVGEESRGIGTNPGI/;ALGACGRTRNAASFF/;KPSSSNSRSKGHAKA/;PGTGSGRVRQVIEW/;LAGAARAEGKFHNVT/;AALGSFAGAVVDWYD/;PSGDSNIELGPTEIL/;LQAGLNQSDDPAEIA/;KIVEYDDMITAML/	12.580000;9.850000;9.080000;6.760000;6.410000;6.310000;6.250000;5.650000;5.540000	0.055208;0.103514;0.123595;0.210863;0.228560;0.233884;0.237137;0.272270;0.000000	2.730000;0.770000;2.320000;0.350000;0.100000;0.060000;0.600000;0.110000;NA	0.000000000003;0.000000000001;0.000000000001;0.000000000001;0.000000000001;0.000000000001;0.000000000001;0.000000000001;0.000000000000	0.000000;0.000000;0.000000;0.000000;0.000000;0.000000;0.000000;0.000000;0.000000
query8334	820.905	1639.8	2	1639.8	-0.002558	I	VPSGASTGVHEALEMR	D			117.8	1	0	gi|00924	106.38	1	100.91	131007_Sam_Standard_03_p.03493.03493.2	1639.866867[-0.070627];1639.798782[-0.002542];1639.795410[0.000830];1639.732544[0.063696];1639.890182[-0.093942];1639.722183[0.074057];1639.770477[0.025763];1639.839188[-0.042948];1639.831818[-0.035578]	KIADPGDPTIDLVLSS/;QIIGSSQMYATAQSR/;DYRRFNQILEGET/;ADRGLNADLDTSEYT/;KIMSHATRPAVMSLV/;ENQVEGMCALFLGET/;VPTMNGAWYAEFVVG/;QLAVKGEYFDAMIR/;PAHSILVDEQRQTF/	11.420000;9.080000;7.230000;6.200000;6.130000;5.620000;5.430000;5.020000;4.830000	0.072111;0.123595;0.189234;0.239883;0.243781;0.274157;0.286418;0.314775;0.000000	2.340000;1.850000;1.030000;0.070000;0.510000;0.190000;0.410000;0.190000;NA	0.000000000023;0.000000000013;0.000000000009;0.000000000007;0.000000000007;0.000000000006;0.000000000006;0.000000000005;0.000000000005	0.000000;0.000000;0.000000;0.000000;0.000000;0.000000;0.000000;0.000000;0.000000
query9847	895.42	1788.83	2	1788.84	-0.011302	K	AAQDSFAAGWGVMVSHR	S			120.21	1	0	gi|00924	100.87	1	98.6704	131007_Sam_Standard_01_p.04282.04282.2	1788.865555[-0.040263];1788.922592[-0.097300];1788.880829[-0.055537];1788.896637[-0.071345];1788.821991[0.003301];1788.908676[-0.083384];1788.900650[-0.075358];1788.907806[-0.082514];1788.868958[-0.043666]	WSQAFAARGTPNEQAR/;NEAVLIGQLECKSMVR/;NRIASSWQWGQFPRG/;VTSSNTTAGGVATGSGLGPR/;WSAPWVDEKVHHDSP/;ITPQDAWTWAFLDLI/;NVGQSLSGQVSIGFAPGTA/;NRTTRQLSLTEEGER/;GGRPHDTAGPTKLCDKH/	19.340000;10.940000;10.800000;9.450000;8.360000;7.170000;6.350000;6.280000;4.420000	0.011641;0.080538;0.083176;0.113501;0.145881;0.191867;0.231739;0.235505;0.000000	8.400000;0.140000;1.350000;1.090000;1.190000;0.820000;0.070000;1.860000;NA	0.000000000082;0.000000000012;0.000000000011;0.000000000008;0.000000000007;0.000000000005;0.000000000004;0.000000000004;0.000000000003	0.000000;0.000000;0.000000;0.000000;0.000000;0.000000;0.000000;0.000000;0.000000
query10135	911.469	1820.92	2	1820.92	0.008305	R	SGETEDTFIADLVVGLR	T			121.63	1	0	gi|00924	100.69	1	97.8621	131007_Sam_Standard_01_p.06434.06434.2	1820.951996[-0.028072];1820.905716[0.018208];1820.913086[0.010838];1820.974426[-0.050502];1820.904404[0.019520];1820.989212[-0.065288];1820.884109[0.039815];1820.946808[-0.022884];1820.842834[0.081090]	IEESISSHPVVAEVAVVG/;SQNVYQFIDLQRVDP/;LAKMIVDAWLGAQYEGG/;RADEGKLPLALDSRPPS/;VEQSVEVAVFDGTTVEL/;MEKLPMIEHGLVVLAAA/;ATITGVLAMPMEAPSFW/;ACRLVVEEHLGHVRGF/;GESDDALDSFELAPVRT/	20.940000;12.790000;12.760000;12.570000;12.020000;11.650000;11.220000;9.520000;7.200000	0.008054;0.052602;0.052966;0.055335;0.062806;0.068391;0.075509;0.111686;0.000000	8.150000;0.030000;0.190000;0.550000;0.370000;0.430000;1.700000;2.320000;NA	0.000000000085;0.000000000013;0.000000000013;0.000000000012;0.000000000011;0.000000000010;0.000000000009;0.000000000006;0.000000000004	0.000000;0.000000;0.000000;0.000000;0.000000;0.000000;0.000000;0.000000;0.000000
query7032	760.37	1518.72	2	1518.7	0.021154	Q	DSFAAGWGVMVSHR	S			117.92	1	0	gi|00924	92.85	1	89.8136	131007_Sam_Standard_03_p.04232.04232.2	1518.736145[-0.011195];1518.732071[-0.007121];1518.767792[-0.042842];1518.738831[-0.013881];1518.750046[-0.025096];1518.822800[-0.097850];1518.713669[0.011281];1518.688507[0.036443];1518.724884[0.000066]	GTIDQNRWGRICT/;KNGSNRAGSRAAEAM/;GEYAQLAQINATQI/;SSFGVASVPPAIGMEA/;SDFARMIPAALDNV/;VGEILFAQMKAKNA/;ISMAGATSNTVHAYP/;MFADDVNKEASHR/;LMGAATRAAQGAEWS/	25.070000;23.540000;15.700000;11.040000;10.410000;10.280000;10.170000;9.590000;9.180000	0.003112;0.004426;0.026915;0.078705;0.090991;0.093756;0.096161;0.109901;0.000000	1.530000;7.840000;4.660000;0.630000;0.130000;0.110000;0.580000;0.410000;NA	0.000000000519;0.000000000365;0.000000000060;0.000000000021;0.000000000018;0.000000000017;0.000000000017;0.000000000015;0.000000000013	0.000000;0.000000;0.000000;0.000000;0.000000;0.000000;0.000000;0.000000;0.000000
query7656	790.91	1579.81	2	1579.82	-0.018352	R	QIIEQLSSGFFSPK	Q			110.93	1	0	gi|00489	94.57	1	88.3985	131007_Sam_Standard_01_p.05104.05104.2	1579.791580[0.014668];1579.879410[-0.073162];1579.850418[-0.044170];1579.831818[-0.025570];1579.831772[-0.025524];1579.839828[-0.033580];1579.893356[-0.087108];1579.865662[-0.059414];1579.831802[-0.025554]	KLKMVDPSSKAFDD/;LNAQGKPVDRIQNK/;AGLIKMSGNRSVGYK/;QLQGADLPKQGIQGQ/;TNIRIEELKEHQA/;IKLESAGAFWKAPY/;LIKESGIAGGVNAVPGV/;KLMSAGPLYHKKHA/;VAQKTPKSDHASLQA/	16.360000;14.600000;12.870000;12.160000;12.150000;11.850000;11.390000;11.110000;11.080000	0.023121;0.034674;0.051642;0.060814;0.060954;0.065313;0.072611;0.077446;0.000000	1.760000;1.730000;0.710000;0.010000;0.300000;0.460000;0.280000;0.030000;NA	0.000000000349;0.000000000233;0.000000000156;0.000000000133;0.000000000132;0.000000000124;0.000000000111;0.000000000104;0.000000000104	0.000000;0.000000;0.000000;0.000000;0.000000;0.000000;0.000000;0.000000;0.000000
query10312	920.957	1839.9	2	1839.91	-0.01623	R	SIVPSGASTGVHEALEMR	D			103.34	1	0	gi|00924	90.96	1	85.8015	131007_Sam_Standard_02_p.03532.03532.2	1839.871933[0.026723];1839.834717[0.063939];1839.904297[-0.005641];1839.922943[-0.024287];1839.991425[-0.092769];1839.995514[-0.096858];1839.987640[-0.088984];1839.973068[-0.074412];1839.867264[0.031392]	ALDNSHERPAAMLREM/;ARADEADQVNGQPAVAND/;TAFDALGAKAGDYYPPAL/;SIVYHLCVEWKTVTY/;AARLAEEKRIADEAAAR/;LASQQSGVPHHLILAQAA/;EAVRMALVNLSAVAAPAGT/;LWQPSAGKPQTVTVSEL/;ADLDLSLRNMTFSKDD/	12.380000;12.370000;8.270000;6.160000;4.470000;3.470000;3.280000;3.230000;3.180000	0.057810;0.057943;0.148936;0.242103;0.357273;0.449780;0.469894;0.475335;0.000000	0.010000;4.100000;2.110000;1.690000;1.000000;0.190000;0.050000;0.050000;NA	0.000000000802;0.000000000800;0.000000000311;0.000000000191;0.000000000130;0.000000000103;0.000000000099;0.000000000097;0.000000000096	0.000000;0.000000;0.000000;0.000000;0.000000;0.000000;0.000000;0.000000;0.000000
query8382	824.378	1646.74	2	1646.76	-0.020945	A	QDSFAAGWGVMVSHR	S			100.65	1	0	gi|00924	84.88	1	79.6303	131007_Sam_Standard_01_p.04289.04289.2	1646.838943[-0.097513];1646.778763[-0.037333];1646.805283[-0.063853];1646.819870[-0.078440];1646.823883[-0.082453];1646.803909[-0.062479];1646.779663[-0.038233];1646.790024[-0.048594];1646.837616[-0.096186]	SPHRAKRPWQGAQE/;QDQPDYLNAAVALET/;SSFGVAGARFASVAYTG/;FNHETRLMSGVTQK/;RMQGSGAPYPALWLT/;NFLEEEALIEVPGST/;MPPMYGQPGGLQGLTT/;QDYGRPPVTAIQDST/;SRSFKGGPQDKQALE/	15.770000;13.140000;12.260000;12.230000;9.190000;8.530000;8.400000;8.070000;7.640000	0.026485;0.048529;0.059429;0.059841;0.120504;0.140281;0.144544;0.155955;0.000000	2.630000;0.880000;0.030000;3.040000;0.660000;0.130000;0.330000;0.430000;NA	0.000000003251;0.000000001774;0.000000001449;0.000000001439;0.000000000714;0.000000000614;0.000000000596;0.000000000552;0.000000000500	0.000000;0.000000;0.000000;0.000000;0.000000;0.000000;0.000000;0.000000;0.000000
query6621	740.4	1478.79	2	1478.79	-0.002039	K	LGEYGFQNALIVR	Y			103.63	1	0	gi|02769	81.85	1	78.4033	131007_Sam_Standard_02_p.04486.04486.2	1478.736511[0.049597];1478.725311[0.060797];1478.740524[0.045584];1478.754654[0.031454];1478.766571[0.019537];1478.740524[0.045584];1478.739868[0.046240];1478.787674[-0.001566];1478.765671[0.020437]	LADISGQQLDYRT/;LVSYQINDDGTVVG/;IWYGDKENIALGT/;GLESIKVMDLLMM/;IWCMSFILVLTGP/;LDAYSKLTTWNAP/;GESLALSSSKMDVR/;ISTICCLLIGYPLA/;SYDPEIFKILPAS/	21.780000;17.780000;14.430000;14.040000;13.330000;11.310000;10.720000;10.580000;10.480000	0.006637;0.016672;0.036058;0.039446;0.046452;0.073961;0.084723;0.087498;0.000000	4.000000;3.350000;0.390000;0.710000;2.020000;0.590000;0.140000;0.100000;NA	0.000000006531;0.000000002600;0.000000001202;0.000000001099;0.000000000933;0.000000000586;0.000000000512;0.000000000495;0.000000000484	0.000000;0.000000;0.000000;0.000000;0.000000;0.000000;0.000000;0.000000;0.000000
query8159	814.395	1626.78	2	1626.79	-0.01333	L	SYVDDEAFIRDVAK	V			93.88	1	0	gi|00489	83.33	1	76.5208	131007_Sam_Standard_03_p.04680.04680.2	1626.726929[0.048681];1626.777725[-0.002115];1626.749405[0.026205];1626.683182[0.092428];1626.830048[-0.054438];1626.734802[0.040808];1626.804398[-0.028788];1626.844620[-0.069010];1626.857666[-0.082056]	AEQMTMLEETFGIQ/;SYLTPEDLSQVFTQ/;SYVDNTRIGAMGICAG/;FCDGQDSADTLITNAG/;TFTPVMAARAQHAVQ/;DGPALPEPAFAPQNCT/;MAGSLKIGRYCMIGGA/;FIALFFAEHSLVFS/;EEGEQATSPRLLGLK/	10.550000;9.050000;8.960000;8.830000;7.980000;5.710000;5.440000;5.040000;4.550000	0.088105;0.124451;0.127057;0.130918;0.159221;0.268534;0.285759;0.313329;0.000000	1.500000;0.090000;0.130000;0.850000;2.270000;0.270000;0.400000;0.490000;NA	0.000000004645;0.000000003289;0.000000003221;0.000000003126;0.000000002570;0.000000001524;0.000000001432;0.000000001306;0.000000001167	0.000000;0.000000;0.000000;0.000000;0.000000;0.000000;0.000000;0.000000;0.000000
query7540	784.919	1567.82	2	1567.82	-0.000269	R	KLLSYVDDEAFIR	D			100.2	1	0	gi|00489	78.76	1	76.0489	131007_Sam_Standard_03_p.04051.04051.2	1567.814041[0.010275];1567.747818[0.076498];1567.818054[0.006262];1567.831787[-0.007471];1567.869507[-0.045191];1567.835861[-0.011545];1567.919830[-0.095514];1567.827957[-0.003641];1567.752045[0.072271]	QLLGDREMSPVPAR/;QPANHSTEVLSTIDG/;QLLHLMIHSLYSN/;KISIDTQNINHSAK/;QLLIGHYERRQR/;QIPDATPTGFVAPVR/;KLLSKNGVFKAHGVA/;QLIKNPLPTETMPS/;QLLLSGMSCASCVTR/	21.440000;13.700000;12.660000;12.020000;11.840000;11.390000;10.660000;10.470000;10.460000	0.007178;0.042658;0.054200;0.062806;0.065464;0.072611;0.085901;0.089743;0.000000	7.740000;1.040000;0.640000;0.180000;0.450000;0.730000;0.190000;0.010000;NA	0.000000013305;0.000000002239;0.000000001762;0.000000001521;0.000000001459;0.000000001315;0.000000001112;0.000000001064;0.000000001062	0.000000;0.000000;0.000000;0.000000;0.000000;0.000000;0.000000;0.000000;0.000000
query5804	703.853	1405.69	2	1405.68	0.007878	L	GIDGGEGKEELFR	S			95.14	1	0	gi|00330	79.51	1	74.0698	131007_Sam_Standard_03_p.03670.03670.2	1405.731339[-0.039715];1405.680573[0.011051];1405.720139[-0.028515];1405.720154[-0.028530];1405.651382[0.040242];1405.760574[-0.068950];1405.691147[0.000477];1405.610977[0.080647];1405.760544[-0.068920]	TARAEGLFKEER/;GIDENTLMAMRR/;REGADASTVIQFL/;GLDFGSDSVRALAV/;VATEHEPGGLYAY/;GINPFLGYTLVGVG/;GLAAFSVLSCDNLP/;QDDGAEAIPGYDR/;LATFGGLKFLEPN/	15.630000;15.220000;10.540000;9.990000;9.750000;8.770000;8.360000;8.340000;7.900000	0.027353;0.030061;0.088308;0.100231;0.105925;0.132739;0.145881;0.146555;0.000000	0.410000;4.680000;0.550000;0.240000;0.980000;0.410000;0.020000;0.440000;NA	0.000000011194;0.000000010186;0.000000003467;0.000000003055;0.000000002891;0.000000002307;0.000000002099;0.000000002089;0.000000001888	0.000000;0.000000;0.000000;0.000000;0.000000;0.000000;0.000000;0.000000;0.000000
query14753	771.391	2311.15	3	2311.14	0.00927	K	ATDGGAHGVINVSVSEAAIEASTR	Y			86.95	1	0	gi|00330	82.2	1	73.7905	131007_Sam_Standard_01_p.03851.03851.3	2311.165558[-0.015877];2311.169601[-0.019920];2311.170898[-0.021217];2311.239822[-0.090141];2311.107590[0.042091];2311.133881[0.015800];2311.151810[-0.002129];2311.147781[0.001900];2311.155838[-0.006157]	DTHVERIEQLGSASLLAGLTSD/;AVSSDLGYLQVSGSQLKQDFLG/;PVHYAGAPADIDAIRAIGERYG/;KGKKIAMTWAYSPSYGKPLSV/;ISLGCTMILSNVSALEDEGGGVF/;KRTRGFDKCSDAESVDLTRQ/;DKALFGDLTDCADFAALLREK/;QCPLIQAPNSLLETGSREQVE/;PAWDAYMKAVLEGVPEQPLTP/	4.750000;4.730000;3.580000;3.510000;3.480000;3.240000;3.130000;2.890000;2.740000	0.334965;0.336512;0.438531;0.445656;0.448745;0.474242;0.486407;0.514044;0.000000	0.020000;1.150000;0.070000;0.030000;0.240000;0.110000;0.240000;0.150000;NA	0.000000006026;0.000000005998;0.000000004603;0.000000004529;0.000000004498;0.000000004256;0.000000004150;0.000000003926;0.000000003793	0.000000;0.000000;0.000000;0.000000;0.000000;0.000000;0.000000;0.000000;0.000000
query5322	681.875	1361.73	2	1361.73	0.004537	S	GAAGGLGSLAVQYAK	A			107.58	1	0	gi|00330	70.67	1	70.5545	131007_Sam_Standard_03_p.03532.03532.2	1361.777893[-0.043055];1361.701309[0.033529];1361.672791[0.062047];1361.705139[0.029699];1361.744232[-0.009394];1361.755432[-0.020594];1361.676132[0.058706];1361.766663[-0.031825];1361.780594[-0.045756]	KANLSVAARSFKA/;RIEDMAYGLVPV/;AGANIDGKHYFGI/;QNRPLVDLEHAA/;VTLLKEVADFDI/;IEALQGEIKSFK/;QNAPGIAAMKAAGY/;QKRAAELLGLTY/;SILLLEKGITFE/	36.910000;14.630000;12.860000;12.260000;12.130000;12.060000;11.300000;10.280000;10.240000	0.000204;0.034435;0.051761;0.059429;0.061235;0.062230;0.074131;0.093756;0.000000	22.280000;1.770000;0.600000;0.130000;0.070000;0.760000;1.020000;0.040000;NA	0.000000085704;0.000000000507;0.000000000337;0.000000000294;0.000000000285;0.000000000281;0.000000000236;0.000000000186;0.000000000185	0.000000;0.000000;0.000000;0.000000;0.000000;0.000000;0.000000;0.000000;0.000000
query10412	927.473	1852.93	2	1852.96	-0.026424	K	LLSYVDDEAFIRDVAK	V			89.67	1	0	gi|00489	73.96	1	70.1224	131007_Sam_Standard_03_p.04682.04682.2	1852.851257[0.079381];1852.989441[-0.058803];1852.972290[-0.041652];1852.898895[0.031743];1852.910110[0.020528];1852.877747[0.052891];1852.975677[-0.045039];1852.917511[0.013127];1853.027130[-0.096492]	FADKNDDISMEKELQA/;IVSRSGTLTYEAVKQTT/;IEYAVYAELTRNIWL/;LLSQTLLGNEGHMNTPE/;LLSEKAQAIQGDNLNCH/;LISEATNYVAADYMRH/;LLSTIPPGPACIYNNPAI/;QTKETYIAPMRVSMAQ/;LLPYLIHTDSNRQRK/	15.710000;10.340000;8.680000;8.260000;8.110000;7.970000;7.570000;7.480000;5.940000	0.026853;0.092470;0.135519;0.149279;0.154525;0.159588;0.174985;0.178649;0.000000	5.370000;1.660000;0.420000;0.150000;0.140000;0.400000;0.090000;1.540000;NA	0.000000040179;0.000000011668;0.000000007962;0.000000007228;0.000000006982;0.000000006761;0.000000006166;0.000000006039;0.000000004236	0.000000;0.000000;0.000000;0.000000;0.000000;0.000000;0.000000;0.000000;0.000000
query9520	878.479	1754.94	2	1754.94	0.001775	K	TAGIQIVADDLTVTNPK	R			94.48	1	0	gi|00924	75.37	1	70.0686	131007_Sam_Standard_03_p.04297.04297.2	1755.011490[-0.068278];1754.949936[-0.006724];1754.868652[0.074560];1754.883926[0.059286];1754.950806[-0.007594];1754.941406[0.001806];1754.854691[0.088521];1754.866119[0.077093];1754.938690[0.004522]	ATGIQLKKQRSQGNKV/;GGEARLNRSIDVRKNA/;VNEVLQDADLGILNDQ/;VDGAQIIGLWGDGVENL/;FFFAALGVRYLAGNIP/;PTGKSLVEGRDELLLE/;LQTGAEAQNAEERNKP/;AAKAEIEHLMNEVFGP/;AASIQEEQGGARALAKR/	19.110000;18.040000;17.260000;12.210000;11.610000;11.270000;10.850000;10.660000;9.760000	0.012274;0.015704;0.018793;0.060117;0.069024;0.074645;0.082224;0.085901;0.000000	1.070000;0.780000;5.050000;0.600000;0.340000;0.420000;0.190000;0.900000;NA	0.000000029040;0.000000022699;0.000000018967;0.000000005929;0.000000005164;0.000000004775;0.000000004335;0.000000004150;0.000000003373	0.000000;0.000000;0.000000;0.000000;0.000000;0.000000;0.000000;0.000000;0.000000
query5868	707.376	1412.74	2	1412.71	0.027943	K	WLTGPQLADLYH	S			90.76	1	0	gi|00924	75.12	1	68.9382	131007_Sam_Standard_02_p.04880.04880.2	1412.762344[-0.025554];1412.733322[0.003468];1412.672455[0.064335];1412.678314[0.058476];1412.723434[0.013356];1412.712189[0.024601];1412.752441[-0.015651];1412.696960[0.039830];1412.762344[-0.025554]	GTIIEGGDVNGRLI/;EPKNITLSCGAPAL/;FDYEQLAFQRP/;GEIVAEIDDAERP/;EGILNRCVYIPH/;PAMQALIEQIYH/;DALRARLVTHFD/;VIVPCGNIADIADN/;SVTLGVSARAQVEP/	15.640000;12.930000;12.830000;12.050000;11.780000;11.630000;11.190000;10.060000;8.870000	0.027290;0.050933;0.052119;0.062373;0.066374;0.068707;0.076033;0.098628;0.000000	2.710000;0.100000;0.780000;0.270000;0.150000;0.440000;1.130000;1.190000;NA	0.000000030761;0.000000016482;0.000000016106;0.000000013459;0.000000012647;0.000000012218;0.000000011041;0.000000008511;0.000000006471	0.000000;0.000000;0.000000;0.000000;0.000000;0.000000;0.000000;0.000000;0.000000
query6185	720.871	1439.73	2	1439.73	-0.001872	K	LLSYVDDEAFIR	D			88.92	1	0	gi|00489	73.67	1	68.5473	131007_Sam_Standard_02_p.04404.04404.2	1439.664276[0.063482];1439.755463[-0.027705];1439.685394[0.042364];1439.685379[0.042379];1439.715225[0.012533];1439.761993[-0.034235];1439.755646[-0.027888];1439.693268[0.034490];1439.733002[-0.005244]	EALDFDPAFCLTV/;LIHLLESMQGGSR/;LLSFLECLTTEDG/;LISLDYDDTLMAA/;LIMMSVITNAYAN/;LLSVDPNNQSQII/;IICYFPQLSLML/;TPPLGPQDQPDYL/;LMAALLHDVIEDT/	15.250000;13.790000;11.990000;11.120000;6.870000;6.740000;6.590000;6.450000;6.250000	0.029854;0.041783;0.063241;0.077268;0.205589;0.211836;0.219280;0.226464;0.000000	1.460000;1.800000;0.870000;4.250000;0.130000;0.150000;0.140000;0.200000;NA	0.000000042954;0.000000030690;0.000000020277;0.000000016596;0.000000006237;0.000000006053;0.000000005848;0.000000005662;0.000000005408	0.000000;0.000000;0.000000;0.000000;0.000000;0.000000;0.000000;0.000000;0.000000
query8053	809.93	1617.85	2	1617.84	0.009939	R	VLGIDGGEGKEELFR	S			95.89	1	0	gi|00330	70.4	1	68.428	131007_Sam_Standard_02_p.03710.03710.2	1617.777405[0.068761];1617.854874[-0.008708];1617.756256[0.089910];1617.807266[0.038900];1617.888550[-0.042384];1617.909012[-0.062846];1617.843597[0.002569];1617.822327[0.023839];1617.777344[0.068822]	DPGIDEILDDTGVFI/;VLGDLNRFTLTGCLP/;DPGVVSVSEIYQYY/;VLGDLGFLMGGTPNEV/;RILRTHAAMSVLGHG/;VILTALIPDDAKVGGH/;VLGIPKPKTMEENY/;ALLTVGIDDTHNRHG/;IVGIPEEEQELYEA/	25.490000;18.610000;14.500000;14.120000;12.740000;12.550000;12.330000;11.060000;10.080000	0.002825;0.013772;0.035481;0.038726;0.053211;0.055590;0.058479;0.078343;0.000000	6.880000;4.110000;0.380000;1.380000;0.190000;0.220000;1.270000;0.980000;NA	0.000000091201;0.000000018707;0.000000007261;0.000000006653;0.000000004842;0.000000004634;0.000000004406;0.000000003289;0.000000002624	0.000000;0.000000;0.000000;0.000000;0.000000;0.000000;0.000000;0.000000;0.000000
query7309	775.895	1549.78	2	1549.76	0.013479	R	IGEEYISDLDQLR	K			90.71	1	0	gi|00489	68.41	1	66.0851	131007_Sam_Standard_01_p.04456.04456.2	1549.835144[-0.059290];1549.763702[0.012152];1549.803482[-0.027628];1549.810013[-0.034159];1549.798752[-0.022898];1549.766418[0.009436];1549.727509[0.048345];1549.778503[-0.002649];1549.708908[0.066946]	IADYELSALLVTRS/;WLYELGNRETNR/;TVGMALADSLNRRF/;IGSYRSQDGAVTALI/;DAIEASGLEYTILR/;WASADLEVFTELIG/;WLEYPNMLWLAD/;LMFLSLPQWMER/;LAQEFGNFLDFYS/	22.300000;14.130000;13.530000;12.390000;11.090000;10.500000;10.450000;9.990000;9.700000	0.005888;0.038637;0.044361;0.057677;0.077804;0.089125;0.090157;0.100231;0.000000	8.170000;0.600000;1.140000;1.300000;0.590000;0.050000;0.460000;0.290000;NA	0.000000144211;0.000000021979;0.000000019143;0.000000014723;0.000000010914;0.000000009528;0.000000009419;0.000000008472;0.000000007925	0.000001;0.000000;0.000000;0.000000;0.000000;0.000000;0.000000;0.000000;0.000000
query7037	760.383	1518.75	2	1518.77	-0.016367	V	LGIDGGEGKEELFR	S			97.53	1	0	gi|00330	66.75	1	66.0397	131007_Sam_Standard_02_p.03711.03711.2	1518.764633[-0.013193];1518.771835[-0.020395];1518.734787[0.016653];1518.786453[-0.035013];1518.792984[-0.041544];1518.721512[0.029928];1518.713699[0.037741];1518.815445[-0.064005];1518.815414[-0.063974]	LGIDENTLMAMRR/;LAVDWGLTFLAENA/;LLGDDERINATMTA/;LGDLNRFTLTGCLP/;LGIDPQSKTLVFSD/;LRENWVNFNAQE/;GLGSITFSMQVDGAH/;VIADGGTRNVAFTAK/;ILGDREKRSVFAE/	30.780000;16.970000;16.560000;15.520000;14.760000;11.960000;11.810000;10.310000;10.170000	0.000836;0.020091;0.022080;0.028054;0.033420;0.063680;0.065917;0.093111;0.000000	13.810000;0.410000;1.040000;0.760000;2.800000;0.150000;1.500000;0.140000;NA	0.000000211349;0.000000008790;0.000000007998;0.000000006295;0.000000005284;0.000000002773;0.000000002679;0.000000001897;0.000000001837	0.000001;0.000000;0.000000;0.000000;0.000000;0.000000;0.000000;0.000000;0.000000
query5601	693.882	1385.75	2	1385.73	0.015188	R	ANGTTVLVGMPAGAK	C			85.15	1	0	gi|00330	71.75	1	64.4801	131007_Sam_Standard_02_p.03015.03015.2	1385.817017[-0.068141];1385.780640[-0.031764];1385.726273[0.022603];1385.715042[0.033834];1385.795227[-0.046351];1385.703812[0.045064];1385.762650[-0.013774];1385.689911[0.058965];1385.817657[-0.068781]	LAYVPSVIVDVIV/;DVETVVLVTIIW/;QNEERVSKIVGQ/;KGGSPEGTVKANLE/;NATVMNTVLVLLV/;KGGEIKSLDDIDP/;GKGSITEQLLNAR/;NDGRTIVSDGKPQ/;RMKQLVADGKKI/	13.400000;12.480000;12.190000;10.850000;10.480000;10.330000;9.700000;9.450000;9.180000	0.045709;0.056494;0.060395;0.082224;0.089536;0.092683;0.107152;0.113501;0.000000	0.920000;0.290000;1.340000;0.370000;0.150000;0.630000;0.250000;0.270000;NA	0.000000066834;0.000000054075;0.000000050582;0.000000037154;0.000000034119;0.000000032961;0.000000028510;0.000000026915;0.000000025293	0.000000;0.000000;0.000000;0.000000;0.000000;0.000000;0.000000;0.000000;0.000000
query5910	708.867	1415.72	2	1415.71	0.004216	R	GNPTVEVELTTEK	G			72.74	1	0	gi|00924	66.02	0.999999	59.8269	131007_Sam_Standard_02_p.02851.02851.2	1415.679337[0.039265];1415.686523[0.032079];1415.693222[0.025380];1415.707855[0.010747];1415.723114[-0.004512];1415.798386[-0.079784];1415.795853[-0.077251];1415.761993[-0.043391];1415.799713[-0.081111]	GNKQVAVSGWQEN/;NGAQARRDNLSSAG/;SLYVKENNLSSY/;LGAQVTEGLAQQAM/;NVRVMPESIPAGF/;LGSLVGAGIGALSSSK/;IGPNLKKPYMKQ/;SVGAIAVKEKGDDK/;EIKNIVRHGIHT/	6.720000;4.110000;3.700000;3.430000;3.040000;2.630000;1.180000;1.160000;1.040000	0.212814;0.388150;0.426580;0.453942;0.496592;0.545758;0.762079;0.765597;0.000000	2.610000;0.410000;0.270000;0.390000;0.410000;1.450000;0.020000;0.120000;NA	0.000000250034;0.000000137088;0.000000124738;0.000000117219;0.000000107152;0.000000097499;0.000000069823;0.000000069502;0.000000067608	0.000001;0.000001;0.000001;0.000001;0.000000;0.000000;0.000000;0.000000;0.000000
query5718	700.348	1398.68	2	1398.69	-0.004589	K	TVMENFVAFVDK	C			76.78	1	0	gi|02769	64.83	0.999998	58.038	131007_Sam_Standard_01_p.05361.05361.2	1398.755417[-0.074657];1398.689163[-0.008403];1398.677948[0.002812];1398.662689[0.018071];1398.739471[-0.058711];1398.724213[-0.043453];1398.735428[-0.054668];1398.652313[0.028447];1398.612579[0.068181]	ISRFMTRFVSR/;TVSYQVANAQYR/;ISPWPGAATGSGGEI/;SISGSHVAIDDIEG/;LSGSLSYIFGKLD/;SLPNLDVAEELTV/;EALVLKSDQAPASA/;LMDTMNDAFTKL/;SATMDESVFAVGW/	11.950000;9.070000;9.000000;8.950000;8.730000;8.680000;8.570000;8.310000;8.130000	0.063826;0.123880;0.125893;0.127350;0.133968;0.135519;0.138995;0.147571;0.000000	2.880000;0.070000;0.050000;0.220000;0.050000;0.110000;0.260000;0.180000;NA	0.000000328851;0.000000169434;0.000000166724;0.000000164816;0.000000156675;0.000000154881;0.000000151008;0.000000142233;0.000000136458	0.000001;0.000001;0.000001;0.000001;0.000001;0.000001;0.000001;0.000001;0.000001
query9621	589.334	1764.98	3	1764.96	0.016623	K	VHINPNSLFDVQVKR	I			77.11	1	0	gi|00489	65.87	0.999998	57.8981	131007_Sam_Standard_02_p.03705.03705.3	1764.925751[0.054373];1764.886871[0.093253];1764.982086[-0.001962];1765.042969[-0.062845];1764.952240[0.027884];1764.919205[0.060919];1765.009964[-0.029840];1764.915878[0.064246];1764.977432[0.002692]	TILYVTALQSEKDER/;FWLLDSEKGEARCIV/;HLRNQILWKNILMS/;FAISFVLLIGLLEIFA/;RPAKYKFIDVNGETK/;CALSYKKPIRDEQKS/;LFVVATMLEIGSLFLI/;QTALFQAFDTLNLQR/;FAVVLSDLTISRGQLF/	11.240000;11.220000;10.580000;10.020000;9.500000;9.410000;8.080000;7.820000;7.210000	0.075162;0.075509;0.087498;0.099541;0.112202;0.114551;0.155597;0.165196;0.000000	0.020000;0.640000;0.560000;0.520000;0.090000;1.330000;0.260000;0.610000;NA	0.000000258821;0.000000257632;0.000000222331;0.000000195434;0.000000173380;0.000000169824;0.000000125026;0.000000117760;0.000000102329	0.000001;0.000001;0.000001;0.000001;0.000001;0.000001;0.000001;0.000001;0.000000
query4426	643.349	1284.68	2	1284.69	-0.008357	Q	IVADDLTVTNPK	R			84.21	1	0	gi|00924	61.52	0.999998	56.4896	131007_Sam_Standard_01_p.02647.02647.2	1284.590759[0.093419];1284.728897[-0.044719];1284.728897[-0.044719];1284.674744[0.009434];1284.762772[-0.078594];1284.733612[-0.049434];1284.714966[-0.030788];1284.744171[-0.059993];1284.707779[-0.023601]	PDADDLMAEVIP/;IVAEVSEVAKGAL/;LLTADLISLNVN/;LASEICLSKQPP/;AVMVALILWAKA/;VLANAQMVVRKG/;LLGDEGIERRK/;LVAFSTHAILTI/;LVTEAIVQHLY/	22.690000;21.790000;21.420000;13.890000;13.530000;13.120000;12.470000;11.950000;11.840000	0.005383;0.006622;0.007211;0.040832;0.044361;0.048753;0.056624;0.063826;0.000000	0.900000;0.370000;7.530000;0.360000;0.410000;0.650000;0.520000;0.110000;NA	0.000000704691;0.000000572795;0.000000526016;0.000000092896;0.000000085506;0.000000077803;0.000000066988;0.000000059429;0.000000057943	0.000003;0.000002;0.000002;0.000000;0.000000;0.000000;0.000000;0.000000;0.000000
query5275	679.385	1356.76	2	1356.76	-0.006159	R	GLAGVENVTELKK	N			83.85	1	0	gi|00489	60.26	0.999998	56.3043	131007_Sam_Standard_02_p.02704.02704.2	1356.772507[-0.017405];1356.783737[-0.028635];1356.797623[-0.042521];1356.724915[0.030187];1356.732285[0.022817];1356.808868[-0.053766];1356.724899[0.030203];1356.761261[-0.006159];1356.728912[0.026190]	LGQVEKGSTVIRA/;AARVQLTTTRLQ/;AGLKTELEQKKI/;LGAGVGSSVLDVVNA/;KLGVDPLTCVALE/;VAKVEIRKEGKT/;AVGVATLAVVAANDS/;GLAGAKDALQLITS/;AVADDIKLVDWL/	23.590000;21.310000;18.750000;15.330000;13.760000;13.700000;12.710000;12.540000;10.640000	0.004375;0.007396;0.013335;0.029309;0.042073;0.042658;0.053580;0.055719;0.000000	2.280000;2.560000;3.420000;1.570000;0.060000;0.990000;0.170000;1.900000;NA	0.000000941887;0.000000557184;0.000000309029;0.000000140604;0.000000097949;0.000000096605;0.000000076913;0.000000073960;0.000000047753	0.000004;0.000002;0.000001;0.000001;0.000000;0.000000;0.000000;0.000000;0.000000
query5856	706.919	1411.82	2	1411.81	0.007924	K	LGANAILGVSLAASR	A			84.38	1	0	gi|00924	58.28	0.999996	54.2989	131007_Sam_Standard_01_p.04485.04485.2	1411.755859[0.066747];1411.807480[0.015126];1411.792206[0.030400];1411.764587[0.058019];1411.778290[0.044316];1411.858459[-0.035853];1411.862289[-0.039683];1411.785690[0.036916];1411.778305[0.044301]	LELAIVGLIDGGGEG/;ELIALLHKVEFT/;LEPSLLELKKDAG/;IGQSVFKLFMSR/;SPELLLRKDGER/;KIKGLLMSAQPKV/;IARQALRLIKSGS/;KLQGLLASCQPAAI/;LLQANLRNDVSAV/	26.100000;21.390000;21.000000;18.840000;18.300000;17.870000;17.430000;17.390000;15.090000	0.002455;0.007261;0.007943;0.013062;0.014791;0.016331;0.018072;0.018239;0.000000	4.710000;0.390000;2.160000;0.540000;0.430000;0.440000;0.040000;2.300000;NA	0.000001485930;0.000000502341;0.000000459196;0.000000279253;0.000000246603;0.000000223356;0.000000201836;0.000000199985;0.000000117760	0.000006;0.000002;0.000002;0.000001;0.000001;0.000001;0.000001;0.000001;0.000001
query7202	769.378	1536.74	2	1536.75	-0.009089	R	FKVFADYEEYVK	C			77.66	1	0	gi|00489	57.9	0.999996	53.9306	131007_Sam_Standard_02_p.04059.04059.2	1536.680618[0.060324];1536.730759[0.010183];1536.739319[0.001623];1536.739487[0.001455];1536.705612[0.035330];1536.808899[-0.067957];1536.674103[0.066839];1536.720856[0.020086];1536.730759[0.010183]	LSIQYCYYEVEAG/;QVELEEFSGSGVKE/;QADSQRPAHGDVRT/;QFVAWCREEASVI/;QDAATKNYVDGVAEG/;FKFVAAEDWVAVR/;GMSDAMIAWAEWLG/;EQHFSEEIYVTR/;EVVDDKEGKYVQE/	19.760000;15.430000;15.120000;11.680000;11.310000;11.020000;10.530000;10.370000;10.370000	0.010568;0.028642;0.030761;0.067920;0.073961;0.079068;0.088512;0.091833;0.000000	4.330000;0.310000;3.440000;0.370000;0.290000;0.490000;0.160000;0.000000;NA	0.000001621804;0.000000598409;0.000000557183;0.000000252347;0.000000231739;0.000000216770;0.000000193641;0.000000186637;0.000000186637	0.000007;0.000003;0.000002;0.000001;0.000001;0.000001;0.000001;0.000001;0.000001
query10915	630.682	1889.02	3	1889	0.022393	K	LITAIGDVVNHDPVVGDR	L			57.41	1	0	gi|00489	56	0.999995	53.3348	131007_Sam_Standard_03_p.03939.03939.3	1888.927902[0.095193];1889.037048[-0.013953]	LLGNLNGTLGPYDGTRND/;LTIINRADVLPLDSNHV/	1.410000;0.690000	0.722770;0.674528	0.720000;NA	0.000002511875;0.000002128129	0.000011;0.000009
query15523	814.382	2440.12	3	2440.13	-0.00454	R	IEEELGDNAVFAGENFHHGDKL	X			55.13	1	0	gi|00924	52.68	0.999995	52.68	131007_Sam_Standard_01_p.03711.03711.3	2440.063477[0.061484]	AVSNGKDMRQADDCTTEWEALT/	2.45	0.058749	NA	5.39508e-06	2.3e-05
query3539	615.348	1228.68	2	1228.67	0.015064	R	GLAGVENVTELK	K			80.89	1	0	gi|00489	57.81	0.999995	52.6364	131007_Sam_Standard_03_p.03280.03280.2	1228.660431[0.020939];1228.594849[0.086521];1228.713943[-0.032573];1228.725159[-0.043789];1228.677551[0.003819];1228.729187[-0.047817];1228.666306[0.015064];1228.717941[-0.036571];1228.666306[0.015064]	VAQVEWKIAW/;AARAIGYEGNAH/;AAVVGRSVGTSLL/;AARVQLTTTRL/;LGAGTSGRLGILD/;LGPFTGRLAGKL/;AKSVIDDLAGLQ/;AAKVLFEPGGLK/;GKLVENEIVTGA/	23.080000;20.510000;19.480000;19.380000;17.430000;15.580000;14.770000;14.630000;14.360000	0.004920;0.008892;0.011272;0.011535;0.018072;0.027669;0.033343;0.034435;0.000000	2.570000;1.030000;0.100000;1.950000;1.850000;0.810000;0.140000;0.270000;NA	0.000001655761;0.000000916215;0.000000722766;0.000000706314;0.000000450814;0.000000294441;0.000000244342;0.000000236591;0.000000222330	0.000007;0.000004;0.000003;0.000003;0.000002;0.000001;0.000001;0.000001;0.000001
query5263	679.324	1356.63	2	1356.62	0.013021	A	VFAGENFHHGDK	L			72.36	1	0	gi|00924	55.31	0.999994	52.2807	131007_Sam_Standard_01_p.03277.03277.2	1356.635025[-0.000895];1356.546967[0.087163];1356.631882[0.002248];1356.682190[-0.048060];1356.617264[0.016866];1356.583389[0.050741];1356.605362[0.028768];1356.703735[-0.069605];1356.634995[-0.000865]	VFANWFSDATSL/;FAEDIYDEQNN/;VFASGTWCRMTV/;VFAVVMFVDMIS/;VFQHPLYTYSC/;FAVGEEDQFSTAG/;MSEHPVDLMAID/;AFLEQHKEKLD/;VFSLSWYNEAAA/	17.050000;9.730000;9.560000;9.560000;7.420000;7.030000;6.640000;6.580000;5.960000	0.019724;0.106414;0.110662;0.110662;0.181134;0.198153;0.216770;0.219786;0.000000	7.320000;0.170000;0.000000;2.140000;0.390000;0.390000;0.060000;0.620000;NA	0.000002944404;0.000000545755;0.000000524804;0.000000524804;0.000000320625;0.000000293088;0.000000267915;0.000000264239;0.000000229085	0.000013;0.000002;0.000002;0.000002;0.000001;0.000001;0.000001;0.000001;0.000001
query5218	678.345	1354.68	2	1354.67	0.008413	R	DYYFALAHTVR	D			72.42	1	0	gi|00489	57.49	0.999994	52.0392	131007_Sam_Standard_01_p.03816.03816.2	1354.713242[-0.037852];1354.672821[0.002569];1354.600098[0.075292];1354.764236[-0.088846];1354.728500[-0.053110];1354.699356[-0.023966];1354.676849[-0.001459];1354.678406[-0.003016];1354.713272[-0.037882]	ADLPWIAESIQL/;EERPAAIEIDNV/;ASDTHAVDVNPTE/;NVQIGALANVIIM/;YYGKAPLVKGYP/;FRGDIQVRTYT/;QYSLPASGKYEL/;GCLLWPPFYFL/;AVDISPLAVDWGL/	14.930000;14.210000;10.710000;9.130000;8.520000;8.180000;8.140000;7.770000;7.430000	0.032137;0.037931;0.084918;0.122180;0.140605;0.152055;0.153462;0.167109;0.000000	0.720000;3.500000;1.580000;0.610000;0.340000;0.040000;0.370000;0.340000;NA	0.000001782368;0.000001510071;0.000000674524;0.000000468810;0.000000407378;0.000000376701;0.000000373248;0.000000342766;0.000000316955	0.000008;0.000007;0.000003;0.000002;0.000002;0.000002;0.000002;0.000001;0.000001
query3777	623.331	1244.65	2	1244.65	-0.002436	N	PTVEVELTTEK	G			77.8	1	0	gi|00924	54.34	0.999993	51.3111	131007_Sam_Standard_02_p.02854.02854.2	1244.577225[0.070333];1244.712860[-0.065302];1244.701614[-0.054056];1244.672470[-0.024912];1244.643448[0.004110];1244.628860[0.018698];1244.643478[0.004080];1244.640060[0.007498];1244.577194[0.070364]	IPSVEEIDTQD/;PTVETKAFPKK/;PLSEVLPSIYK/;VVAAGKNGATTVAS/;SLPEDLRMAIT/;PTPTEAGFELLA/;TPVVECTDLLR/;PEAEEALIAFR/;PSLEISNEEID/	23.460000;18.960000;18.540000;15.040000;10.450000;9.330000;9.100000;8.410000;8.410000	0.004508;0.012706;0.013996;0.031333;0.090157;0.116681;0.123027;0.144212;0.000000	4.500000;0.420000;3.500000;4.590000;1.120000;0.230000;0.690000;0.000000;NA	0.000003681263;0.000001306161;0.000001185760;0.000000529660;0.000000184076;0.000000142232;0.000000134895;0.000000115079;0.000000115079	0.000016;0.000006;0.000005;0.000002;0.000001;0.000001;0.000001;0.000000;0.000000
query5484	688.837	1375.66	2	1375.68	-0.017696	L	DWDKAWEVTVK	T			74.57	1	0	gi|00489	56.71	0.999993	51.261	131007_Sam_Standard_03_p.04479.04479.2	1375.655411[0.004109];1375.701706[-0.042186];1375.724808[-0.065288];1375.734726[-0.075206];1375.719498[-0.059978];1375.730698[-0.071178];1375.691803[-0.032283];1375.676559[-0.017039];1375.757172[-0.097652]	QDGMLWAESRAL/;GTSLSGLDAAMAVAI/;KPYVKADYKHQ/;KNEIIFGDITVQ/;TSLDTPVSKTTGGL/;ASRDDAITISTKV/;RFLQASVIEPNC/;TVTENCNDILRV/;KAFSERLRSSVP/	17.860000;15.320000;15.080000;12.270000;11.880000;11.760000;11.720000;11.040000;10.810000	0.016368;0.029376;0.031046;0.059293;0.064863;0.066681;0.067298;0.078705;0.000000	2.540000;0.240000;2.810000;0.390000;0.120000;0.040000;0.680000;0.230000;NA	0.000002133029;0.000001188493;0.000001124597;0.000000588839;0.000000538266;0.000000523597;0.000000518796;0.000000443605;0.000000420723	0.000009;0.000005;0.000005;0.000003;0.000002;0.000002;0.000002;0.000002;0.000002
query3912	626.339	1250.66	2	1250.66	0.002018	K	SISIVGSYVGNR	A			77.32	1	0	gi|00330	58.68	0.999992	51.1683	131007_Sam_Standard_03_p.03286.03286.2	1250.650635[0.013279];1250.636749[0.027165];1250.618515[0.045399];1250.745880[-0.081966];1250.723434[-0.059520];1250.713531[-0.049617];1250.673340[-0.009426];1250.658066[0.005848];1250.673141[-0.009227]	EASGLEYTILR/;ATLDVRGGYRSG/;ATDIVVMRIMC/;RLIGPGEQLRL/;VSVPNLIGALPTA/;SNKAVAVFFLR/;PATLVFMGFVLG/;SLSMVEGGVLLF/;RIPDVVQRDPG/	18.640000;18.500000;18.430000;16.870000;16.660000;14.510000;14.190000;13.990000;13.830000	0.013677;0.014125;0.014355;0.020559;0.021577;0.035400;0.038107;0.039902;0.000000	0.140000;0.070000;1.560000;0.210000;2.150000;0.320000;0.200000;0.160000;NA	0.000001355179;0.000001312190;0.000001291209;0.000000901564;0.000000859007;0.000000523596;0.000000486403;0.000000464512;0.000000447710	0.000006;0.000006;0.000006;0.000004;0.000004;0.000002;0.000002;0.000002;0.000002
query4673	653.368	1304.72	2	1304.71	0.012578	K	HLVDEPQNLIK	Q			71.64	1	0	gi|02769	56	0.999992	50.9962	131007_Sam_Standard_01_p.02786.02786.2	1304.672424[0.048986];1304.781616[-0.060206];1304.632248[0.089162];1304.708847[0.012563];1304.628860[0.092550];1304.702301[0.019109];1304.724091[-0.002681];1304.708847[0.012563];1304.767700[-0.046290]	GEYLRAENILQ/;PKGITPTTHIIK/;TPTPAPFETLTM/;TRVAYIDGGILQ/;YSVDQAFISLY/;AFLCRDIARLQ/;LHLAPWQSILQ/;HIAGEAGIPQTVI/;IHVDQVVALRR/	15.640000;13.050000;11.310000;9.840000;9.410000;9.400000;8.720000;7.500000;7.390000	0.027290;0.049545;0.073961;0.103753;0.114551;0.114815;0.134276;0.177828;0.000000	2.590000;1.740000;1.470000;0.430000;0.010000;0.680000;1.220000;0.110000;NA	0.000002511866;0.000001383555;0.000000926822;0.000000660688;0.000000598407;0.000000597031;0.000000510501;0.000000385475;0.000000375834	0.000011;0.000006;0.000004;0.000003;0.000003;0.000003;0.000002;0.000002;0.000002
query5532	690.37	1378.73	2	1378.71	0.016225	E	EYISDLDQLRK	L			74.72	1	0	gi|00489	53.51	0.99999	49.9938	131007_Sam_Standard_02_p.03944.03944.2	1378.781967[-0.056529];1378.688095[0.037343];1378.749634[-0.024196];1378.684067[0.041371];1378.716644[0.008794];1378.713242[0.012196];1378.678192[0.047246];1378.639816[0.085622];1378.801300[-0.075862]	EYLKGDKKIKAS/;EYLSNGKVVWAN/;EYNLLVIFIQQ/;EYLRRLDDAATG/;TMEFVDIAGLVKG/;EYLQNLVPFKE/;QYNKAFSAHWK/;EATEKSMSQIQGA/;VLFVSILWFKQ/	21.210000;16.470000;14.620000;13.420000;13.050000;12.500000;11.080000;10.240000;9.090000	0.007568;0.022542;0.034514;0.045499;0.049545;0.056234;0.077983;0.094624;0.000000	4.740000;1.850000;1.200000;0.370000;0.550000;1.420000;0.840000;1.150000;NA	0.000004456518;0.000001496221;0.000000977227;0.000000741303;0.000000680763;0.000000599785;0.000000432509;0.000000356448;0.000000273524	0.000019;0.000006;0.000004;0.000003;0.000003;0.000003;0.000002;0.000002;0.000001
query5146	674.876	1347.74	2	1347.73	0.008841	V	VGLSTLPEIYEK	M			74.01	1	0	gi|00330	55.9	0.99999	49.9048	131007_Sam_Standard_03_p.04049.04049.2	1347.703430[0.033972];1347.744034[-0.006632];1347.664352[0.073050];1347.714645[0.022757];1347.751038[-0.013636];1347.746994[-0.009592];1347.653290[0.084112];1347.645279[0.092123];1347.649277[0.088125]	VAGETLINYVVNG/;RLMGLILVMMAT/;RLSQDVDHKHN/;VKTELPGRTNAY/;INHADKVITLQP/;ATAKKASSTQSRL/;PEMVIAHIFEY/;RMGVSTSGDTVAPA/;ENITIHFDMTK/	18.110000;16.660000;16.000000;15.200000;13.190000;11.450000;11.140000;11.110000;11.020000	0.015453;0.021577;0.025119;0.030200;0.047973;0.071614;0.076913;0.077446;0.000000	1.450000;0.660000;0.800000;2.010000;1.740000;0.310000;0.030000;0.090000;NA	0.000002570370;0.000001840753;0.000001581232;0.000001315211;0.000000827934;0.000000554620;0.000000516411;0.000000512856;0.000000502337	0.000011;0.000008;0.000007;0.000006;0.000004;0.000002;0.000002;0.000002;0.000002
query7237	770.881	1539.75	2	1539.76	-0.008646	S	YVDDEAFIRDVAK	V			67.23	1	0	gi|00489	56.63	0.99999	49.7929	131007_Sam_Standard_03_p.04687.04687.2	1539.738968[0.009298];1539.717377[0.030889];1539.723892[0.024374];1539.694885[0.053381];1539.754425[-0.006159];1539.696701[0.051565];1539.752869[-0.004603];1539.709244[0.039022];1539.710175[0.038091]	RGGSHSGNVAASELAQ/;YVDNTRIGAMGICAG/;YAQIGVESAVMSASQ/;MYNGINELIDDLM/;YVMVFSDWRQLP/;GHWEEWRDRAAQ/;KAAAAGASGYSITSATN/;YSELEEEWKAEK/;FLPDIYVPCDQCK/	10.600000;10.310000;9.340000;7.240000;6.610000;6.600000;6.250000;5.120000;4.310000	0.087096;0.093111;0.116413;0.188799;0.218273;0.218776;0.237137;0.307610;0.000000	0.290000;0.970000;2.100000;0.630000;0.010000;0.350000;1.130000;0.810000;NA	0.000002172678;0.000002032336;0.000001625532;0.000001002295;0.000000866953;0.000000864959;0.000000797986;0.000000615170;0.000000510500	0.000009;0.000009;0.000007;0.000004;0.000004;0.000004;0.000003;0.000003;0.000002
query8329	820.477	1638.94	2	1638.93	0.008337	R	KVPQVSTPTLVEVSR	S			69.03	1	0	gi|02769	55.16	0.999988	49.3448	131007_Sam_Standard_03_p.03103.03103.2	1638.868896[0.069922];1638.857697[0.081121];1638.861679[0.077139];1638.989273[-0.050455];1638.956955[-0.018137];1638.943024[-0.004206];1638.966827[-0.028009];1638.877640[0.061178];1638.970871[-0.032053]	NLPKVGNEVRNAIES/;QPNLLTGLNTLGGNLD/;QVDEALELYKRYL/;KPVSAAKRRGLLKSE/;KVALTIGRLVQAGAWG/;VQPGARVRWSKISR/;NLPRGTIKATLLIET/;QPVRARQCWAQLIA/;GGILATLPSGWIIKLT/	13.870000;12.980000;10.050000;9.560000;8.960000;7.920000;7.590000;7.150000;6.650000	0.041020;0.050350;0.098855;0.110662;0.127057;0.161436;0.174181;0.192752;0.000000	0.890000;2.930000;0.490000;0.600000;1.040000;0.330000;0.440000;0.500000;NA	0.000003047860;0.000002483104;0.000001264722;0.000001129783;0.000000984000;0.000000774453;0.000000717786;0.000000648627;0.000000578089	0.000013;0.000011;0.000005;0.000005;0.000004;0.000003;0.000003;0.000003;0.000003
query6080	713.896	1425.78	2	1425.77	0.004872	R	HLQIIYEINQR	F			89.41	1	0	gi|00489	50.32	0.999988	49.3387	131007_Sam_Standard_03_p.03313.03313.2	1425.834366[-0.056682];1425.736450[0.041234];1425.728577[0.049107];1425.750351[0.027333];1425.753723[0.023961];1425.820450[-0.042766];1425.783569[-0.005885];1425.772827[0.004857];1425.750351[0.027333]	HIKLIDLHIDPL/;LHQGEAGELRIGF/;AEASHNIVLLQTM/;SYQLLKAYDVNI/;SYKLKLTNEVMT/;HIKLAAFDVTRR/;IKHLLCCAIAASAL/;HIEIASRQINVF/;IHLQIAPYETIE/	39.090000;27.430000;26.560000;26.560000;23.950000;22.140000;19.090000;17.170000;17.130000	0.000123;0.001807;0.002208;0.002208;0.004027;0.006109;0.012331;0.019187;0.000000	11.660000;0.870000;0.000000;2.610000;1.810000;3.050000;1.920000;0.040000;NA	0.000009289556;0.000000633862;0.000000518794;0.000000518794;0.000000284443;0.000000187497;0.000000092896;0.000000059703;0.000000059155	0.000040;0.000003;0.000002;0.000002;0.000001;0.000001;0.000000;0.000000;0.000000
query2559	559.294	1116.57	2	1116.56	0.016103	R	VAAAFPGDVDR	L			77.95	1	0	gi|00489	52.67	0.999986	48.4207	131007_Sam_Standard_03_p.02553.02553.2	1116.584869[-0.012385];1116.592758[-0.020274];1116.592743[-0.020259];1116.529907[0.042577];1116.581497[-0.009013];1116.523361[0.049123];1116.530762[0.041722];1116.581528[-0.009044];1116.639038[-0.066554]	VASCSLPAEIK/;AAAVFGPQKGAT/;GALAFEPSLGR/;GLAVTDPDQTT/;KIAFPNDEAL/;QPSLMGDDVR/;INTMPGTPMVG/;GIAAEITTWGV/;VALVSSTLALSG/	25.280000;20.540000;20.270000;19.150000;18.570000;18.200000;16.390000;15.840000;15.820000	0.002965;0.008831;0.009397;0.012162;0.013900;0.015136;0.022961;0.026062;0.000000	4.740000;0.270000;1.120000;0.580000;0.370000;1.810000;0.550000;0.020000;NA	0.000005407465;0.000001815490;0.000001706058;0.000001318238;0.000001153437;0.000001059238;0.000000698222;0.000000615168;0.000000612342	0.000023;0.000008;0.000007;0.000006;0.000005;0.000005;0.000003;0.000003;0.000003
query8797	839.932	1677.85	2	1677.86	-0.008356	R	IGEEYISDLDQLRK	L			67.52	1	0	gi|00489	54.06	0.999982	47.5645	131007_Sam_Standard_01_p.03956.03956.2	1677.791977[0.056997];1677.763458[0.085516];1677.857330[-0.008356];1677.795822[0.053152];1677.852158[-0.003184];1677.930145[-0.081171];1677.934128[-0.085154];1677.799164[0.049810];1677.767456[0.081518]	GEELETLCNAGIPFSV/;WLETDSNKDSWQGL/;GEEYISDLDQLRKL/;NEGQYLTGTVGPERSA/;DARLHHIMLDIHHA/;VSVQKVADFLAVSKST/;EIGTILKAFNYPISL/;NLSNATNQMIEGTAKS/;VSEIYQYYKEHGY/	13.460000;12.890000;12.020000;11.070000;8.030000;8.030000;7.610000;7.300000;6.800000	0.045082;0.051404;0.062806;0.078163;0.157398;0.157398;0.173380;0.186209;0.000000	0.570000;0.870000;0.950000;3.040000;0.000000;0.420000;0.310000;0.500000;NA	0.000003926381;0.000003443439;0.000002818334;0.000002264605;0.000001124585;0.000001124585;0.000001020922;0.000000950588;0.000000847213	0.000017;0.000015;0.000012;0.000010;0.000005;0.000005;0.000004;0.000004;0.000004
query4741	656.842	1311.67	2	1311.67	-0.002406	R	SIGGEVFIDFTK	E			66.76	1	0	gi|00330	54.2	0.999981	47.1832	131007_Sam_Standard_02_p.04857.04857.2	1311.674423[-0.005747];1311.630676[0.038000];1311.598297[0.070379];1311.714645[-0.045969];1311.751038[-0.082362];1311.685654[-0.016978];1311.660492[0.008184];1311.634705[0.033971];1311.583893[0.084783]	EAGSVLPMEPAVL/;DGAAPLPTDQAGVT/;VEAENFLFTDQ/;ISGEVLRNAISPG/;TVVDKRAEVAPK/;EKSSGAVMFKKT/;AENMKKNPQVGP/;SLGDDVIFATQF/;GEKPMEMAYVGT/	12.560000;12.420000;11.050000;10.650000;9.460000;7.760000;7.590000;7.300000;6.960000	0.055463;0.057280;0.078524;0.086099;0.113240;0.167494;0.174181;0.186209;0.000000	0.140000;1.370000;0.400000;1.190000;1.700000;0.170000;0.290000;0.340000;NA	0.000003801821;0.000003681219;0.000002685293;0.000002449016;0.000001862052;0.000001258901;0.000001210575;0.000001132379;0.000001047109	0.000017;0.000016;0.000012;0.000011;0.000008;0.000005;0.000005;0.000005;0.000005
query7527	784.378	1566.74	2	1566.74	0.006231	K	DAFLGSFLYEYSR	R			76.83	1	0	gi|02769	47.1	0.999979	46.7155	131007_Sam_Standard_01_p.05797.05797.2	1566.683807[0.057867];1566.692566[0.049108];1566.717712[0.023962];1566.812927[-0.071253];1566.735489[0.006185];1566.746033[-0.004359];1566.837418[-0.095744];1566.756561[-0.014887];1566.767822[-0.026148]	VQDPNYLFQEEDA/;WFLACSTPAHTGGYG/;EGFLHVFPQIYDC/;WFIGAVTRPMYRA/;GEFGGPWIDALFTGT/;AFPMGSGSDSQLSKR/;LRHMLPNAMVATLT/;SYSIDALNISIGEW/;YVAGVNFLLSNQQD/	29.730000;13.470000;10.930000;10.700000;10.210000;10.020000;8.790000;7.970000;7.970000	0.001064;0.044978;0.080724;0.085114;0.095280;0.099541;0.132130;0.159588;0.000000	16.260000;2.540000;0.230000;0.490000;0.190000;1.230000;0.820000;0.000000;NA	0.000019498031;0.000000461308;0.000000257034;0.000000243776;0.000000217766;0.000000208445;0.000000157033;0.000000130014;0.000000130014	0.000085;0.000002;0.000001;0.000001;0.000001;0.000001;0.000001;0.000001;0.000001
query1881	529.325	1056.64	2	1056.63	0.006474	N	AILGVSLAASR	A			82.86	1	0	gi|00924	51.45	0.999977	46.4135	131007_Sam_Standard_01_p.03730.03730.2	1056.640350[-0.004756];1056.654266[-0.018672];1056.676758[-0.041164];1056.571609[0.063985];1056.581482[0.054112];1056.608002[0.027592];1056.596756[0.038838];1056.596756[0.038838];1056.640350[-0.004756]	ALIRLSARTG/;ALLDKLAKSV/;VRVVSLKTR/;SPRLSLWQA/;ALLNEIEKAG/;IALSRLFHT/;LLAGWLALNS/;IAIKDALAWG/;ALRSLLGTAR/	31.410000;28.320000;27.280000;26.370000;26.370000;26.370000;22.670000;22.490000;21.820000	0.000723;0.001472;0.001871;0.002307;0.002307;0.002307;0.005408;0.005636;0.000000	3.090000;1.040000;0.910000;0.000000;0.000000;3.700000;0.180000;0.670000;NA	0.000007161271;0.000003515524;0.000002766878;0.000002243831;0.000002243831;0.000002243831;0.000000957172;0.000000918312;0.000000787028	0.000031;0.000015;0.000012;0.000010;0.000010;0.000010;0.000004;0.000004;0.000003
query6721	746.4	1490.79	2	1490.79	-0.005457	K	LPLVGGHEGAGVVVGM	G			68.05	1	0	gi|00330	51.04	0.999977	46.3264	131007_Sam_Standard_01_p.04391.04391.2	1490.809311[-0.023203];1490.772934[0.013174];1490.864273[-0.078165];1490.870834[-0.084726];1490.726822[0.059286];1490.728638[0.057470];1490.787659[-0.001551];1490.755142[0.030966];1490.856918[-0.070810]	AGRISGSTPFIVVTS/;WQSREVTTVVVTS/;YLQVLGLKLSAMR/;VAYVKQTALVVITS/;SWFVYLQYVVGM/;AMAKQSEVLDIDTA/;QYLILPGLAEMLM/;RTFVLGSNAMPAVE/;RDVKRVGYLVVST/	17.010000;13.390000;13.300000;12.430000;9.900000;9.810000;8.570000;8.180000;6.690000	0.019907;0.045814;0.046774;0.057148;0.102329;0.104472;0.138995;0.152055;0.000000	3.620000;0.090000;0.870000;2.530000;0.090000;1.240000;0.390000;1.490000;NA	0.000007870275;0.000003419715;0.000003349576;0.000002741510;0.000001531052;0.000001499650;0.000001127171;0.000001030362;0.000000731122	0.000034;0.000015;0.000015;0.000012;0.000007;0.000007;0.000005;0.000004;0.000003
query6311	724.411	1446.81	2	1446.8	0.009756	K	VVGLSTLPEIYEK	M			68.18	1	0	gi|00330	50.42	0.999977	46.3226	131007_Sam_Standard_01_p.04410.04410.2	1446.748032[0.058706];1446.833389[-0.026651];1446.783051[0.023687];1446.808243[-0.001505];1446.717712[0.089026];1446.736313[0.070425];1446.783081[0.023657];1446.783081[0.023657];1446.855804[-0.049066]	ALGVGPGRNWAHVN/;VAIATLVDILFTTA/;VRIVEAQQLASAY/;GIEVGTLPGQPAVIP/;VVQMVSTAAVQEW/;VKLCCYEGLLLGH/;AAVVIGTEIFGRNT/;GLPVSGHATATLNLP/;KEIAKQAAGPLPPK/	17.760000;14.240000;11.290000;10.850000;10.110000;9.540000;8.840000;8.750000;8.510000	0.016749;0.037670;0.074302;0.082224;0.097499;0.111173;0.130617;0.133352;0.000000	3.520000;2.950000;0.440000;0.740000;0.570000;0.700000;0.090000;0.240000;NA	0.000009077994;0.000004036360;0.000002046397;0.000001849225;0.000001559516;0.000001367697;0.000001164099;0.000001140223;0.000001078922	0.000039;0.000018;0.000009;0.000008;0.000007;0.000006;0.000005;0.000005;0.000005
query7494	783.389	1564.76	2	1564.77	-0.009868	I	GEEYISDLDQLRK	L			68.08	1	0	gi|00489	52.65	0.999976	46.2777	131007_Sam_Standard_02_p.03936.03936.2	1564.791901[-0.028499];1564.798416[-0.035014];1564.780685[-0.017283];1564.763382[0.000020];1564.693298[0.070104];1564.774124[-0.010722];1564.798431[-0.035029];1564.725632[0.037770];1564.861282[-0.097880]	ISDYLGANGKGLMLN/;DSLYLLKNTEEIQ/;YIDSLGAGEVVAIMQ/;EGEYSRITRAPTW/;GEEYSSLTEYQFI/;EGEYRVPAAKMLAM/;GEYELNTGKVIIET/;EGYELDAEEREIL/;DAKNKKAFSPYILA/	15.430000;13.490000;12.710000;12.680000;11.310000;11.220000;10.210000;10.030000;9.850000	0.028642;0.044771;0.053580;0.053951;0.073961;0.075509;0.095280;0.099312;0.000000	1.940000;0.780000;0.030000;1.370000;0.090000;1.010000;0.180000;0.180000;NA	0.000005432375;0.000003475280;0.000002903954;0.000002883964;0.000002103729;0.000002060581;0.000001633013;0.000001566714;0.000001503107	0.000024;0.000015;0.000013;0.000013;0.000009;0.000009;0.000007;0.000007;0.000007
query1846	527.757	1053.5	2	1053.48	0.022512	R	TNFDAFPDK	V			72.35	1	0	gi|00489	47.44	0.999972	45.4897	131007_Sam_Standard_03_p.02756.02756.2	1053.520309[-0.021067];1053.516479[-0.017237];1053.440353[0.058889];1053.520309[-0.021067];1053.480103[0.019139];1053.472687[0.026555];1053.436325[0.062917];1053.527725[-0.028483];1053.443710[0.055532]	TNAHAVAKDQ/;KSFDSVIMQ/;TNFDWGSDL/;TLNKHAAGDQ/;SGALFTDMNV/;QSYKNAQTD/;QSSGTFEQGN/;QSTFLVCTR/;QSDYPTCLQ/	24.910000;16.450000;14.970000;14.000000;12.380000;12.190000;11.970000;11.970000;9.810000	0.003228;0.022646;0.031842;0.039811;0.057810;0.060395;0.063533;0.063533;0.000000	8.460000;1.480000;0.970000;1.620000;0.190000;0.220000;0.000000;2.160000;NA	0.000018029668;0.000002570323;0.000001828049;0.000001462136;0.000001006903;0.000000963802;0.000000916195;0.000000916195;0.000000557170	0.000078;0.000011;0.000008;0.000006;0.000004;0.000004;0.000004;0.000004;0.000002
query2491	556.258	1110.5	2	1110.48	0.017172	F	AGENFHHGDK	L			73.61	1	0	gi|00924	51.04	0.999972	45.483	131007_Sam_Standard_01_p.03282.03282.2	1110.530548[-0.029108];1110.530533[-0.029093];1110.534561[-0.033121];1110.534546[-0.033106];1110.566940[-0.065500];1110.484268[0.017172];1110.425430[0.076010];1110.553024[-0.051584];1110.465179[0.036261]	GALDVHLSNEG/;AGNEHEDLVK/;QNFEAVLQY/;KEASSLWYAG/;KIHLVSDGDQ/;NNQVHEGWQ/;QWEDFSGDQ/;AGSRVGQGHKD/;PCGETVSYQQ/	22.570000;18.540000;18.480000;18.450000;18.380000;17.210000;16.990000;16.340000;16.290000	0.005534;0.013996;0.014191;0.014289;0.014521;0.019011;0.019999;0.023227;0.000000	4.030000;0.060000;0.030000;0.070000;1.170000;0.220000;0.650000;0.050000;NA	0.000007870235;0.000003111628;0.000003068935;0.000003047809;0.000002999078;0.000002290803;0.000002177648;0.000001874941;0.000001853479	0.000034;0.000014;0.000013;0.000013;0.000013;0.000010;0.000009;0.000008;0.000008
query8904	563.975	1688.9	3	1688.88	0.025673	K	ARPEFTLPVHFYGR	V			62.62	1	0	gi|00489	53.39	0.999971	45.4005	131007_Sam_Standard_03_p.04115.04115.3	1688.874695[0.029686];1688.866821[0.037560];1688.811340[0.093041];1688.841019[0.063362];1688.827042[0.077339];1688.827042[0.077339];1688.842316[0.062065];1688.876724[0.027657];1688.876694[0.027687]	LPFLAHGGSHSRSAGPV/;IVHALGANVHASCAIDV/;IPMGCVLTLPATGSESN/;PSFSLWPAGQPTTTVT/;GNYRDRILTYYQQ/;AVQATGFEAYYRASR/;WPNGLYGSHLAVYGR/;VVKAAGGTLDVAATAAACT/;ADELLLKVENTTMGR/	9.230000;8.930000;8.650000;8.150000;7.610000;7.360000;6.090000;6.040000;5.280000	0.119399;0.127938;0.136458;0.153109;0.173380;0.183654;0.246037;0.248886;0.000000	0.300000;0.280000;0.500000;0.540000;0.250000;1.270000;0.050000;0.760000;NA	0.000004581287;0.000004275506;0.000004008552;0.000003572625;0.000003154914;0.000002978431;0.000002223246;0.000002197796;0.000001844962	0.000020;0.000019;0.000017;0.000016;0.000014;0.000013;0.000010;0.000010;0.000008
query4537	646.808	1291.6	2	1291.6	-0.002161	Y	DLDFKNPNSDK	S			71.03	1	0	gi|00924	50.07	0.999971	45.3441	131007_Sam_Standard_02_p.02617.02617.2	1291.604462[-0.002192];1291.665939[-0.063669];1291.663300[-0.061030];1291.619003[-0.016733];1291.608475[-0.006205];1291.652054[-0.049784];1291.575439[0.026831];1291.652069[-0.049799];1291.564880[0.037390]	AGGTGTDNTSIWL/;KKYAELSEPID/;GARFAGGGQKKTD/;KSQSEMENAIR/;VEDKFGSWPEV/;DIDGAFVAKNSR/;DLFPSPCEKAAD/;DIDFPRTSVRS/;MPDERLGERSC/	20.960000;17.100000;16.020000;15.520000;15.090000;14.590000;13.410000;12.810000;12.200000	0.008017;0.019498;0.025003;0.028054;0.030974;0.034754;0.045604;0.052360;0.000000	3.860000;1.080000;0.500000;0.430000;0.500000;1.180000;0.600000;0.610000;NA	0.000009839824;0.000004045641;0.000003154912;0.000002811819;0.000002546756;0.000002269799;0.000001729766;0.000001506563;0.000001309144	0.000043;0.000018;0.000014;0.000012;0.000011;0.000010;0.000008;0.000007;0.000006
query3176	594.34	1186.67	2	1186.66	0.010259	L	AGVENVTELKK	N			77.55	1	0	gi|00489	51.89	0.999968	44.9866	131007_Sam_Standard_03_p.02657.02657.2	1186.583008[0.082982];1186.619339[0.046651];1186.619354[0.046636];1186.634613[0.031377];1186.619339[0.046651];1186.612823[0.053167];1186.630600[0.035390];1186.582962[0.083028];1186.674347[-0.008357]	AGVETTTGPLGQG/;ENIDIQSLKQ/;KVEDGLGDLNK/;QVERGLEPLF/;QITQELEQAK/;AGVLMDRNLAGA/;ARDIVQDSGVK/;QVEEGAEVAKAG/;AGGAIKMIAEVK/	25.660000;24.780000;23.510000;22.750000;22.420000;21.940000;21.360000;21.280000;20.830000	0.002716;0.003327;0.004457;0.005309;0.005728;0.006397;0.007311;0.007447;0.000000	0.880000;1.270000;0.760000;0.330000;0.480000;0.580000;0.080000;0.450000;NA	0.000006471221;0.000005284285;0.000003944448;0.000003311206;0.000003068925;0.000002747807;0.000002404287;0.000002360403;0.000002128072	0.000028;0.000023;0.000017;0.000014;0.000013;0.000012;0.000010;0.000010;0.000009
query2963	582.828	1163.64	2	1163.63	0.010854	S	ISIVGSYVGNR	A			80.89	1	0	gi|00330	47.07	0.999968	44.892	131007_Sam_Standard_01_p.03165.03165.2	1163.662415[-0.021693];1163.643784[-0.003062];1163.662415[-0.021693];1163.582245[0.058477];1163.666229[-0.025507];1163.629852[0.010870];1163.666214[-0.025492];1163.662369[-0.021647];1163.698776[-0.058054]	LSIVGTLAMFL/;LSLVLFSSGIE/;LSLVMDVFKL/;LSLREIFGDD/;LSLRLSELHP/;ISRISQQIGY/;LEARHIELIA/;IAEMYLLKAI/;LSLIFKLISM/	33.820000;27.570000;27.570000;20.270000;20.270000;18.320000;17.460000;16.670000;16.390000	0.000415;0.001750;0.001750;0.009397;0.009397;0.014723;0.017947;0.021528;0.000000	6.250000;0.000000;7.300000;0.000000;1.950000;0.860000;0.790000;0.280000;NA	0.000019632966;0.000004655710;0.000004655710;0.000000866934;0.000000866934;0.000000553332;0.000000453927;0.000000378430;0.000000354802	0.000085;0.000020;0.000020;0.000004;0.000004;0.000002;0.000002;0.000002;0.000002
query2818	576.779	1151.54	2	1151.53	0.009892	I	VNMLMHHDR	F			69.87	1	0	gi|00489	47.54	0.999967	44.7503	131007_Sam_Standard_01_p.03979.03979.2	1151.546738[-0.004040];1151.589661[-0.046963];1151.532135[0.010563];1151.604706[-0.062008];1151.564468[-0.021770];1151.618637[-0.075939];1151.564514[-0.021816];1151.553253[-0.010555];1151.572357[-0.029659]	GRMLMFPVSD/;VNMLVTLDTF/;VNMLWFDDL/;VNELHNTGLR/;NVMIIYRED/;GILDAGPATGALP/;VGGMYGVAQGTL/;VDGYEMLVNI/;EPWVTIHDR/	22.330000;14.130000;14.130000;13.930000;13.810000;12.840000;11.200000;10.270000;10.210000	0.005848;0.038637;0.038637;0.040458;0.041591;0.052000;0.075858;0.093972;0.000000	8.200000;0.000000;0.200000;0.120000;0.970000;1.640000;0.930000;0.060000;NA	0.000017619170;0.000002666769;0.000002666769;0.000002546745;0.000002477339;0.000001981461;0.000001358268;0.000001096441;0.000001081398	0.000077;0.000012;0.000012;0.000011;0.000011;0.000009;0.000006;0.000005;0.000005
query14864	582.773	2327.06	4	2327.05	0.017495	R	IEEELGDNAVFAGENFHHGDK	L			48.11	1	0	gi|00924	44.6	0.999965	44.6002	131007_Sam_Standard_01_p.03280.03280.4	2327.106339[-0.043403]	QAVVSAQSSLDAMEAGYSVGTRT/	3.51	0.178649	NA	3.46725e-05	0.000151
query14991	782.416	2344.23	3	2344.29	-0.063331	D	RIPELRQIIEQLSSGFFSPK	Q			59.18	1	0	gi|00489	48.85	0.999964	44.427	131007_Sam_Standard_03_p.06489.06489.3	2344.141586[0.085366];2344.216171[0.010781];2344.213486[0.013466];2344.213470[0.013482];2344.212128[0.014824];2344.202255[0.024697];2344.205658[0.021294];2344.199097[0.027855];2344.148773[0.078179]	RPNVTNMRQALLMGEHYSVE/;IEEQPDLSGKYTQPILKEAVS/;GRQLAVRSDNAEPDLTYQAIK/;KGEQRAVNLTYDNPQELKNK/;LAIELASTAVQEADKAESRETI/;ETPVDEQGLQFARGSKEAALKA/;TIEPTGLGTVKDGGLNASLMGRAS/;ARLDQMMESVSQLLQLARAGQ/;LEQPNHHLIPADSEFYPPQL/	10.330000;6.090000;5.400000;4.960000;2.940000;2.440000;2.200000;1.960000;1.670000	0.092683;0.246037;0.288403;0.319154;0.508159;0.570164;0.602560;0.636796;0.000000	4.240000;0.690000;0.440000;2.020000;0.500000;0.240000;0.240000;0.290000;NA	0.000013031198;0.000004908902;0.000004187785;0.000003784289;0.000002376755;0.000002118285;0.000002004400;0.000001896637;0.000001774125	0.000057;0.000021;0.000018;0.000016;0.000010;0.000009;0.000009;0.000008;0.000008
query2108	539.301	1076.59	2	1076.58	0.011036	Y	YFALAHTVR	D			69.53	1	0	gi|00489	46.25	0.999963	44.3116	131007_Sam_Standard_03_p.03760.03760.2	1076.532440[0.055302];1076.609055[-0.021313];1076.565475[0.022267];1076.517838[0.069904];1076.561447[0.026295];1076.623001[-0.035259];1076.586563[0.001179];1076.550186[0.037556];1076.575363[0.012379]	LMHLAASAYT/;GRAARALVYT/;YFAHGAVLSI/;LDWPAAIYE/;NPVALGQEIH/;VGVQAKIVTY/;NAAAALASYIL/;ALGLNNIAEY/;LPTTGIIAEY/	23.280000;13.930000;13.710000;11.290000;11.170000;10.890000;10.740000;10.330000;10.020000	0.004699;0.040458;0.042560;0.074302;0.076384;0.081470;0.084333;0.092683;0.000000	9.350000;0.220000;2.420000;0.120000;0.280000;0.150000;0.410000;0.310000;NA	0.000023712858;0.000002754127;0.000002618086;0.000001499629;0.000001458760;0.000001367678;0.000001321247;0.000001202220;0.000001119396	0.000103;0.000012;0.000011;0.000007;0.000006;0.000006;0.000006;0.000005;0.000005
query4816	660.345	1318.68	2	1318.67	0.003164	N	VSVSEAAIEASTR	Y			67.86	1	0	gi|00330	48.67	0.999958	43.7303	131007_Sam_Standard_03_p.02757.02757.2	1318.618698[0.057302];1318.680222[-0.004222];1318.641357[0.034643];1318.688126[-0.012126];1318.598221[0.077779];1318.724487[-0.048487];1318.688110[-0.012110];1318.676849[-0.000849];1318.625214[0.050786]	DAGEEALTQVRM/;ASSLMGSIAGIAEL/;VGLCLSAISCAWP/;SGQQTAAQIFGLV/;WAPFAPGEANYP/;LATSARATIFTPA/;ADTYQVIRPVAS/;SAFAQSEPELKL/;ASIKEDEIQEGT/	19.190000;14.740000;14.500000;14.370000;14.070000;13.050000;12.500000;11.520000;11.080000	0.012050;0.033574;0.035481;0.036559;0.039174;0.049545;0.056234;0.070469;0.000000	4.450000;0.240000;0.130000;0.300000;1.020000;0.550000;0.980000;0.440000;NA	0.000013582559;0.000004875078;0.000004612980;0.000004476943;0.000004178127;0.000003303555;0.000002910594;0.000002322638;0.000002098851	0.000059;0.000021;0.000020;0.000019;0.000018;0.000014;0.000013;0.000010;0.000009
query4009	629.789	1257.56	2	1257.55	0.011129	V	FAGENFHHGDK	L			67.15	1	0	gi|00924	48.24	0.999952	43.1486	131007_Sam_Standard_01_p.03274.03274.2	1257.566605[-0.002787];1257.624115[-0.060297];1257.577850[-0.014032];1257.573807[-0.009989];1257.617584[-0.053766];1257.594894[-0.031076];1257.551315[0.012503];1257.631287[-0.067469];1257.581223[-0.017405]	FANWFSDATSL/;KYTAEDKFGVT/;AIGDVHFGWQE/;ELRGHEQDFQ/;FAGKPMYRTST/;QGANAEAAKAAGAE/;EYADKDNLYGA/;QAAERALNSVEA/;ERGNTFMFGVT/	18.910000;17.540000;15.140000;13.690000;13.130000;10.380000;9.900000;9.900000;9.850000	0.012853;0.017620;0.030620;0.042756;0.048641;0.091622;0.102329;0.102329;0.000000	1.370000;2.400000;1.450000;0.560000;2.750000;0.480000;0.000000;0.050000;NA	0.000014996122;0.000010939034;0.000006294757;0.000004507949;0.000003962588;0.000002103677;0.000001883558;0.000001883558;0.000001861997	0.000065;0.000048;0.000027;0.000020;0.000017;0.000009;0.000008;0.000008;0.000008
query5415	686.34	1370.66	2	1370.64	0.028143	V	FAGENFHHGDKL	X			67.46	1	0	gi|00924	48.32	0.999949	42.9376	131007_Sam_Standard_03_p.03653.03653.2	1370.621017[0.043875];1370.683701[-0.018809];1370.759827[-0.094935];1370.640106[0.024786];1370.729294[-0.064402];1370.690216[-0.025324];1370.683884[-0.018992];1370.665268[-0.000376];1370.613632[0.051260]	VSNLYGMVTGMAE/;SMGRHIQSQRAT/;LSFGAFFIGLKAT/;FAMVRYDRAADG/;QTLLLPESAADIT/;GRLQNQNEQLAT/;FAMFQDIKRIC/;FRAGFSGLMIDAS/;TTGDAIYMRGADT/	19.140000;18.040000;15.470000;13.870000;12.530000;12.530000;11.860000;11.480000;11.060000	0.012190;0.015704;0.028379;0.041020;0.055847;0.055847;0.065163;0.071121;0.000000	1.100000;2.570000;1.600000;1.340000;0.000000;0.670000;0.380000;0.420000;NA	0.000014722376;0.000011428202;0.000006323797;0.000004374999;0.000003213497;0.000003213497;0.000002754089;0.000002523352;0.000002290751	0.000064;0.000050;0.000027;0.000019;0.000014;0.000014;0.000012;0.000011;0.000010
query15662	822.746	2465.22	3	2465.23	-0.017463	K	APNDFNLKDFNVGGYIQAVLDR	N			58.39	1	0	gi|00489	49.35	0.99994	42.2089	131007_Sam_Standard_01_p.06573.06573.3	2465.150757[0.065697];2465.281509[-0.065055];2465.193481[0.022973];2465.306671[-0.090217];2465.252518[-0.036064];2465.302628[-0.086174];2465.302643[-0.086189];2465.215958[0.000496];2465.184494[0.031960]	MQYANISPPELMGFSVNEPWR/;PSFEIASKLHEAQTLLGHFANR/;PFADESHRDENIQLLQNAAGAAV/;NVAPAAWVKKIKKPEQVDDGSW/;FAAQLLGLGYSKRLNGPSWEQM/;FPSKTPKNGSRNPKEPKELNPT/;VGQLFESDHKRIELLLQANQQ/;VHRVRDIEADTPARYNADPDR/;CSPLTKAHRPHVFQGDWCRDL/	9.040000;8.500000;7.860000;6.420000;5.840000;5.730000;4.670000;4.360000;4.280000	0.124738;0.141254;0.163682;0.228034;0.260615;0.267301;0.341193;0.366438;0.000000	0.540000;0.640000;1.440000;0.580000;0.110000;1.060000;0.310000;0.080000;NA	0.000011613788;0.000010255903;0.000008850624;0.000006352927;0.000005558708;0.000005419683;0.000004245940;0.000003953428;0.000003881270	0.000050;0.000045;0.000038;0.000028;0.000024;0.000024;0.000018;0.000017;0.000017
query3875	625.847	1249.68	2	1249.67	0.012792	E	YISDLDQLRK	L			63.35	1	0	gi|00489	48.89	0.999939	42.1521	131007_Sam_Standard_02_p.03948.03948.2	1249.655396[0.024022];1249.739380[-0.059962];1249.678040[0.001378];1249.605270[0.074148];1249.607773[0.071645];1249.696472[-0.017054];1249.619019[0.060399];1249.666611[0.012807];1249.619003[0.060415]	YISLDVADLKN/;YLKGDKKIKAS/;YLMAELVWLI/;LYKEFYASMV/;YLAPDSEILET/;YISLQRMAIR/;YLSEQAPTTIQ/;YLKNKAALDNT/;KAESQFAVLEE/	14.460000;13.390000;11.390000;11.300000;11.200000;10.670000;10.180000;9.980000;9.790000	0.035810;0.045814;0.072611;0.074131;0.075858;0.085704;0.095940;0.100462;0.000000	1.070000;2.000000;0.090000;0.100000;0.530000;0.490000;0.200000;0.190000;NA	0.000012911406;0.000010091914;0.000006367567;0.000006236968;0.000006094998;0.000005394778;0.000004819184;0.000004602285;0.000004405280	0.000056;0.000044;0.000028;0.000027;0.000026;0.000023;0.000021;0.000020;0.000019
query5784	702.864	1403.71	2	1403.68	0.036139	D	SFAAGWGVMVSHR	S			69.07	1	0	gi|00924	43.09	0.999936	41.9403	131007_Sam_Standard_01_p.04288.04288.2	1403.707840[0.005148];1403.707840[0.005148];1403.707840[0.005148];1403.729675[-0.016687];1403.623825[0.089163];1403.740845[-0.027857];1403.730301[-0.017313];1403.668106[0.044882];1403.802399[-0.089411]	ESLNIEVSVAGRM/;DVKTICEQEARI/;GTERLAEVVEKCA/;FGTGVLGTDLNTPI/;QPEAMEVSNLESA/;ERASLEIIQQAF/;EVNSKSGRAVAMR/;QSFDAVEALGRDP/;FASNTTLLILLQA/	25.980000;14.740000;12.160000;11.790000;11.370000;10.930000;10.660000;10.250000;10.200000	0.002523;0.033574;0.060814;0.066222;0.072946;0.080724;0.085901;0.094406;0.000000	11.240000;2.580000;0.370000;0.420000;0.440000;0.270000;0.410000;0.050000;NA	0.000049087647;0.000003689540;0.000002036912;0.000001870562;0.000001698135;0.000001534519;0.000001442023;0.000001312116;0.000001297096	0.000213;0.000016;0.000009;0.000008;0.000007;0.000007;0.000006;0.000006;0.000006
query4065	631.329	1260.64	2	1260.65	-0.007229	D	WDKAWEVTVK	T			65.35	1	0	gi|00489	48.78	0.999935	41.8867	131007_Sam_Standard_01_p.04526.04526.2	1260.634995[0.008045];1260.631012[0.012028];1260.705078[-0.062038];1260.594589[0.048451];1260.576843[0.066197];1260.551010[0.092030];1260.661514[-0.018474];1260.580856[0.062184];1260.605820[0.037220]	VAKEYVAAQDPA/;GEDVAVSRTTVGA/;VSDRFRAALRA/;AETQRDLTAEQ/;QSMPGERETVAG/;EGDYLPDLDPQ/;HFFRDIVTLN/;EAAASIGMTPWQ/;GRDAGETELSAR/	16.570000;15.630000;15.550000;14.070000;13.310000;12.030000;11.790000;11.330000;10.990000	0.022029;0.027353;0.027861;0.039174;0.046666;0.062661;0.066222;0.073621;0.000000	0.940000;0.080000;1.480000;0.760000;1.280000;0.240000;0.460000;0.340000;NA	0.000013242558;0.000010665270;0.000010470607;0.000007446837;0.000006251322;0.000004655559;0.000004405263;0.000003962524;0.000003664138	0.000058;0.000046;0.000045;0.000032;0.000027;0.000020;0.000019;0.000017;0.000016
query3702	620.838	1239.66	2	1239.64	0.022176	D	YYFALAHTVR	D			62.83	1	0	gi|00489	50.14	0.999934	41.8217	131007_Sam_Standard_01_p.03825.03825.2	1239.693512[-0.031306];1239.632187[0.030019];1239.613525[0.048681];1239.653305[0.008901];1239.729904[-0.067698];1239.657150[0.005056];1239.645889[0.016317];1239.682327[-0.020121];1239.693527[-0.031321]	NRLQALLGVEQ/;LNVFASIGAVFC/;YYPLTEGEIR/;GDPGMSIQLLLP/;RLGQQIEKLGV/;VVQQQLNNGLQ/;ELEPQVAERLG/;VGNVGVGIADGIGL/;LGRIDVLVNNAG/	12.690000;11.770000;11.750000;11.630000;11.630000;11.630000;11.510000;10.230000;9.640000	0.053827;0.066527;0.066834;0.068707;0.068707;0.068707;0.070632;0.094842;0.000000	0.920000;0.020000;0.120000;0.000000;0.000000;0.120000;1.280000;0.590000;NA	0.000009682142;0.000007833781;0.000007797788;0.000007585277;0.000007585277;0.000007585277;0.000007378557;0.000005495047;0.000004797019	0.000042;0.000034;0.000034;0.000033;0.000033;0.000033;0.000032;0.000024;0.000021
query6941	754.88	1507.75	2	1507.75	-0.005367	G	EEYISDLDQLRK	L			63.57	1	0	gi|00489	48.46	0.999934	41.7996	131007_Sam_Standard_02_p.03942.03942.2	1507.726654[0.019780];1507.720779[0.025655];1507.749146[-0.002712];1507.770477[-0.024043];1507.755188[-0.008754];1507.770432[-0.023998];1507.756714[-0.010280];1507.737900[0.008534];1507.722839[0.023595]	EEYLRRLDDAATG/;EQYNKAFSAHWK/;QRHLQLQQQQSD/;TVAGSVTPNFIMSGK/;SLVNLATTSSMEKQ/;AAKPDKSLYLACTQ/;MVWLFLPSMQKE/;QRYSLNDGEGIRT/;MPTTIEATELFQQ/	15.110000;13.860000;13.620000;12.620000;12.170000;10.190000;9.550000;9.280000;8.960000	0.030832;0.041115;0.043451;0.054702;0.060674;0.095719;0.110917;0.118032;0.000000	1.250000;0.240000;1.000000;0.450000;1.980000;0.640000;0.270000;0.320000;NA	0.000014255134;0.000010689842;0.000010115126;0.000008034730;0.000007243881;0.000004591677;0.000003962518;0.000003723671;0.000003459165	0.000062;0.000046;0.000044;0.000035;0.000031;0.000020;0.000017;0.000016;0.000015
query8589	832.427	1662.84	2	1662.83	0.007725	I	TAIGDVVNHDPVVGDR	L			57.06	1	0	gi|00489	49.16	0.999929	41.507	131007_Sam_Standard_03_p.03945.03945.2	1662.857681[-0.017375];1662.850494[-0.010188];1662.808243[0.032063];1662.800186[0.040120];1662.832565[0.007741];1662.792313[0.047993];1662.912704[-0.072398];1662.771179[0.069127];1662.857681[-0.017375]	DGITAGEKDFSALIAR/;EYFVIDGPTPKAVLD/;RVCVSPMYADRNPR/;IESQLWGEVQFGDR/;GDIDGVQGQIVHALGAN/;CFLSIDEVDVPAEAR/;TLDGAVKLMLRYQVG/;TALWALYDSQGNPMP/;GIDRDLKELYNVQT/	7.900000;7.730000;6.790000;5.940000;5.500000;5.160000;4.870000;4.200000;4.140000	0.162181;0.168655;0.209411;0.254683;0.281838;0.304789;0.325837;0.380189;0.000000	0.170000;0.940000;0.850000;0.440000;0.340000;0.290000;0.670000;0.060000;NA	0.000012133031;0.000011667271;0.000009396569;0.000007726260;0.000006981831;0.000006456086;0.000006039059;0.000005175702;0.000005104689	0.000053;0.000051;0.000041;0.000034;0.000030;0.000028;0.000026;0.000022;0.000022
[truncated: 139 more rows]

## Sheet: Mascot_sTPS_242
Table S-2, (Peptides Identified by Mascot in sTPS search)
[truncated: 243 more rows]

## Sheet: DS_sTPS_247
Table S-2, (Peptides Identified by DS in sTPS search)
[truncated: 248 more rows]

## Sheet: CS_sTPS_245
Table S-2, (Peptides Identified by CS in sTPS search)
[truncated: 246 more rows]
