# Supplementary material for: An improved scoring method for the identification of endogenous peptides based on the Mascot MS/MS ion search
Source: Royal Society of Chemistry journal article supplement (doi:10.1039/c8an02141d), 2019-01-01
Supplement: c8an02141d4.xlsx [file c8an02141d4.xlsx]

## Sheet: Mascot_ peptides_38
Table S-4, (Peptides Identified by Mascot)
Query Number	Observed m/z	Observed MW	Observed Charge State	Theoretical MW	MW Error	Residue Before	Seq	Residue After	Protein Length	From	to	Modification	Mod Location	Mascot Score	Unique	Missed Cleavage	Accession	DS	Contribution Fraction C1	CS	Title	Subranked Theoretical MW[Error]	Subranked Seq/Mod[Loc]	Subranked Mascot Scores	Subranked Random Matched Probabilities	Subranked MDScores	Subranked Contibution Fractions	Subranked Contribution Scores
query8278	856.968	1711.92	2	1711.94	-0.014109	D	INSPISGEIVEVNTKL	S	162	99	114			131.56	1	0	Solyc08g007040.2.1	104.53	1	98.2699	cyr_090307_meja_05_2_bi4_p.01798.01798.2_42.788mins	1711.916779[0.004705];1711.899216[0.022268];1711.886154[0.035330];1711.890976[0.030508];1711.966095[-0.044611];1711.822220[0.099264];1711.827271[0.094213];1711.899185[0.022299];1711.846710[0.074774]	QVSNKVMKSRSIKK/Phospho (ST)[0000000002000000];QVSVVRELEIESLPD/;ARSKEMKRGGSMFLV/Oxidation (M)[00000000000010000];QVSVFKILLDRDLS/Phospho (ST)[0000000000000020];NLSLPLEGWFKLPKA/;GADAIINFIETPFPK/Phospho (ST)[00000000000200000];YSPAMALNMNEKSKI/Oxidation (M)[00000000010000000];SINPIEKELDELQGK/;KVKAMELIDQLEVT/Oxidation (M) Phospho (ST)[0000010000000020]	27.030000;26.750000;24.930000;24.440000;22.070000;20.760000;20.350000;19.950000;18.960000	0.001982;0.002113;0.003214;0.003597;0.006209;0.008395;0.009226;0.010116;0.000000	0.280000;1.820000;0.490000;2.370000;1.310000;0.410000;0.400000;0.990000;NA	0.000000000035;0.000000000033;0.000000000022;0.000000000019;0.000000000011;0.000000000008;0.000000000008;0.000000000007;0.000000000005	0.000000;0.000000;0.000000;0.000000;0.000000;0.000000;0.000000;0.000000;0.000000
query6876	802.47	1602.93	2	1602.93	-0.009241	M	VLGLGTGSTAAFVVAKL	G	294	82	98			125.72	1	0	Solyc01g097460.2.1	106.06	1	99.3468	cyr_090307_meja_05_2_bi3_p.02062.02062.2_49.447mins	1602.838196[0.087072];1602.920578[0.004690];1602.838196[0.087072];1602.838196[0.087072];1602.825333[0.099935];1602.872955[0.052313];1602.872955[0.052313];1602.898087[0.027181];1602.925278[-0.000010]	VLGLITIESKSLHN/Phospho (ST)[0000002000000000];VLGAVARDIIVNGIGH/;VLGLITIESKSLHN/Phospho (ST)[0000000002000000];VLGLITIESKSLHN/Phospho (ST)[0000000000020000];PDVASQPSPATLLNPP/;PKTITGSGDAPRXPPP/;PKTITGSGDAPRXPPP/;IVGLGYSNISIINQL/;LVRAFRQMGVVRR/Oxidation (M)[000000001000000]	19.660000;18.590000;17.660000;16.570000;15.540000;15.310000;15.310000;15.190000;14.560000	0.010814;0.013836;0.017140;0.022029;0.027925;0.029444;0.029444;0.030269;0.000000	1.070000;0.930000;1.090000;1.030000;0.230000;0.000000;0.120000;0.630000;NA	0.000000000025;0.000000000019;0.000000000016;0.000000000012;0.000000000010;0.000000000009;0.000000000009;0.000000000009;0.000000000008	0.000000;0.000000;0.000000;0.000000;0.000000;0.000000;0.000000;0.000000;0.000000
query16738	1296.64	2591.26	2	2591.31	-0.050823	A	LEVLLGGDDGSLAFIPGNFSVSAGEK	I	171	72	97			120.16	1	0	Solyc04g082010.1.1	102.1	1	95.655	cyr_090307_meja_05_2_bi3_p.02153.02153.2_51.815mins	2591.272263[-0.011181];2591.338364[-0.077282];2591.322296[-0.061214];2591.322296[-0.061214];2591.286560[-0.025478];2591.301239[-0.040157];2591.301239[-0.040157];2591.301239[-0.040157];2591.301239[-0.040157]	SASQVMAVLQLPFAVASIILTEK/Oxidation (M) 2 Phospho (ST)[0202001000000000000000000];NLNNSVYTWLFKLSNLTHLDLS/;QVFGMSLVTLIFALVGFLSPSNR/Oxidation (M) Phospho (ST)[0000010000000000000002000];QVFGMSLVTLIFALVGFLSPSNR/Oxidation (M) Phospho (ST)[0000010000000000000200000];VATMSGLHLCRAGVSSRLFELHK/Phospho (ST)[0000000000000000200000000];QALKVSSSPPTLIATLKELLDHA/2 Phospho (ST)[0000000000020002000000000];QALKVSSSP…	18.060000;15.870000;14.280000;14.280000;14.180000;14.060000;13.940000;13.940000;13.940000	0.015631;0.025882;0.037325;0.037325;0.038194;0.039264;0.040365;0.040365;0.000000	2.190000;1.590000;0.000000;0.100000;0.120000;0.120000;0.000000;0.000000;NA	0.000000000062;0.000000000037;0.000000000026;0.000000000026;0.000000000025;0.000000000025;0.000000000024;0.000000000024;0.000000000024	0.000000;0.000000;0.000000;0.000000;0.000000;0.000000;0.000000;0.000000;0.000000
query6812	800.439	1598.86	2	1598.85	0.012334	D	INSPISGEIVEVNTK	L	162	99	113			106.71	1	0	Solyc08g007040.2.1	75.12	1	70.5099	cyr_090307_meja_05_2_bi4_p.01600.01600.2_37.628mins	1598.843277[0.020589];1598.837601[0.026265];1598.843277[0.020589];1598.885239[-0.021373];1598.780411[0.083455];1598.822556[0.041310];1598.895325[-0.031459];1598.829346[0.034520];1598.899124[-0.035258]	VQSPLSKKSFKISA/Phospho (ST)[0000000002000000];NISPLTGSNGEIRKN/;VQSPLSKKSFKISA/Phospho (ST)[0000000000000200];VQSPLSTQATAGKRR/;LNSSLSLSGTDLSLL/Phospho (ST)[00000000000002000];VVQKSSMLYSLDTL/Oxidation (M)[0000000100000000];QVSPLVTLGLLESLM/;RASSILQRFSKLN/Phospho (ST)[000020000000000];NLISPSKANITSLKN/	31.590000;27.780000;27.580000;27.580000;25.150000;23.060000;22.280000;21.600000;21.400000	0.000693;0.001667;0.001746;0.001746;0.003055;0.004943;0.005916;0.006918;0.000000	3.810000;0.200000;0.000000;2.430000;2.090000;0.780000;0.680000;0.200000;NA	0.000000030761;0.000000012794;0.000000012218;0.000000012218;0.000000006982;0.000000004315;0.000000003606;0.000000003083;0.000000002944	0.000000;0.000000;0.000000;0.000000;0.000000;0.000000;0.000000;0.000000;0.000000
query5776	745.94	1489.86	2	1489.85	0.014027	M	VLGLGTGSTAAFVVAK	L	294	82	97			98.86	1	0	Solyc01g097460.2.1	72.75	1	71.41	cyr_090307_meja_05_2_bi5_p.01782.01782.2_42.234mins	1489.788895[0.075581];1489.927216[-0.062740];1489.814026[0.050450];1489.902100[-0.037624];1489.794571[0.069905];1489.898026[-0.033550];1489.797913[0.066563];1489.934402[-0.069926];1489.871552[-0.007076]	PKTITGSGDAPRXPP/;VIGLSFLAFLLVAK/;IVGLGYSNISIINQ/;VIGIGGFGKVFKGVL/;VIGLLXFPGIVAPT/Phospho (ST)[0000000000000020];LAGLNKKVHEIGIV/;IGLGSLIIMPLLGN/Phospho (ST)[0000020000000000];LRLLLSSKGKFKT/;LGVIKSSLGISKTST/	26.110000;14.830000;13.780000;13.070000;12.360000;12.130000;11.410000;11.230000;10.920000	0.002449;0.032885;0.041879;0.049317;0.058076;0.061235;0.072277;0.075336;0.000000	11.280000;1.050000;0.710000;0.710000;0.230000;0.720000;0.180000;0.310000;NA	0.000000053088;0.000000003954;0.000000003105;0.000000002636;0.000000002239;0.000000002123;0.000000001799;0.000000001726;0.000000001607	0.000000;0.000000;0.000000;0.000000;0.000000;0.000000;0.000000;0.000000;0.000000
query17240	887.462	2659.36	3	2659.28	0.087013	R	FNKVNYANVSTNNYALDEVEEVK	-	141	118	140			91.04	1	0	Solyc09g063130.2.1	74.01	1	66.689	cyr_090307_meja_05_2_bi3_p.01650.01650.3_38.703mins	2659.286911[0.076637];2659.286942[0.076606];2659.271667[0.091881];2659.271667[0.091881];2659.271667[0.091881];2659.355515[0.008033];2659.355515[0.008033];2659.317932[0.045616];2659.417877[-0.054329]	KSYKDIVGSAYYVAPEVLRRCY/Phospho (ST)[002000000000000000000000];KYNTNGNLLPPNFINVVGCLYGIG/Phospho (ST)[00002000000000000000000000];KVMGTNSELAYDSNPLIWVSRIS/Phospho (ST)[0000000000000000000000020];KVMGTNSELAYDSNPLIWVSRIS/Phospho (ST)[0000000000000000000020000];KVMGTNSELAYDSNPLIWVSRIS/Phospho (ST)[0000000000000200000000000];VSTKKLNVVGFRGRSSSSSNNTRV/Phospho (ST)[00020000000000000000000000];VSTKKLNVVGFRG…	17.030000;15.950000;15.510000;15.510000;15.510000;12.950000;12.950000;12.920000;12.250000	0.019815;0.025410;0.028119;0.028119;0.028119;0.050699;0.050699;0.051050;0.000000	1.080000;0.440000;0.000000;0.000000;2.560000;0.000000;0.030000;0.670000;NA	0.000000039719;0.000000030974;0.000000027990;0.000000027990;0.000000027990;0.000000015524;0.000000015524;0.000000015417;0.000000013213	0.000000;0.000000;0.000000;0.000000;0.000000;0.000000;0.000000;0.000000;0.000000
query6336	779.894	1557.77	2	1557.79	-0.016932	L	IMVTSTSLMLFAGR	F	131	56	69	2 Oxidation (M)	[0010000001000000]	90.48	1	0	Solyc08g006930.2.1	63.27	0.999999	58.9029	cyr_090307_meja_05_2_bi3_p.01812.01812.2_42.927mins	1557.768341[0.004217];1557.791565[-0.019007];1557.807220[-0.034662];1557.774902[-0.002344];1557.786102[-0.013544];1557.818436[-0.045878];1557.780396[-0.007838];1557.780396[-0.007838];1557.807907[-0.035349]	FIVMNDEFLMRK/Oxidation (M)[00000000001000];LLYKKNSNGTVKN/Phospho (ST)[000000020000000];LMAELLVQIDGLNN/Oxidation (M)[0010000000000000];IFVTFAGMKVSDVE/Oxidation (M)[0000000010000000];MLSLSHHYTIVEL/Oxidation (M)[010000000000000];IMAEVLVANKNLNN/Oxidation (M)[0010000000000000];SLVVSFGASVATVGGK/Phospho (ST)[000002000000000000];SLVVSFGASVATVGGK/Phospho (ST)[020000000000000000];LFVTSPFGSFSEKI/	27.210000;23.610000;21.660000;20.800000;19.930000;19.490000;18.840000;18.840000;18.750000	0.001901;0.004355;0.006823;0.008318;0.010162;0.011246;0.013062;0.013062;0.000000	3.600000;1.950000;0.860000;0.870000;0.440000;0.650000;0.000000;0.090000;NA	0.000000470977;0.000000205589;0.000000131220;0.000000107646;0.000000088105;0.000000079616;0.000000068549;0.000000068549;0.000000067143	0.000002;0.000001;0.000001;0.000000;0.000000;0.000000;0.000000;0.000000;0.000000
query7343	818.924	1635.83	2	1635.8	0.034306	M	EGVESFDIDIKEQK	V	114	28	41			87.43	1	0	Solyc11g007200.1.1	63.99	0.999998	56.6634	cyr_090307_meja_05_2_bi5_p.01551.01551.2_36.214mins	1635.781387[0.052083];1635.805511[0.027959];1635.805511[0.027959];1635.805511[0.027959];1635.772202[0.061268];1635.862045[-0.028575];1635.772980[0.060490];1635.769135[0.064335];1635.769135[0.064335]	REESFPMLEELQI/Oxidation (M)[000000010000000];KFKKIMQKSTSNT/Oxidation (M) Phospho (ST)[000000100000020];KFKKIMQKSTSNT/Oxidation (M) Phospho (ST)[000000100002000];KFKKIMQKSTSNT/Oxidation (M) Phospho (ST)[000000100020000];WPFTLDEFVQAFH/;FGPLVHIIEASSQAAP/;VSAAGQAQPSAGTQRK/Phospho (ST)[000000000020000000];VYRILMAQSGSSKT/Oxidation (M) Phospho (ST)[0000001000000020];VYRILMAQSGSSKT/Oxidation (M) Phospho …	23.440000;21.670000;21.670000;21.670000;20.490000;20.340000;20.190000;20.150000;20.150000	0.004529;0.006808;0.006808;0.006808;0.008933;0.009247;0.009572;0.009661;0.000000	1.770000;0.000000;0.000000;1.180000;0.150000;0.150000;0.040000;0.000000;NA	0.000000399024;0.000000265460;0.000000265460;0.000000265460;0.000000202301;0.000000195434;0.000000188799;0.000000187068;0.000000187068	0.000002;0.000001;0.000001;0.000001;0.000001;0.000001;0.000001;0.000001;0.000001
query3961	650.383	1298.75	2	1298.72	0.032873	L	LTVIGGASERVPT	L	287	273	285			86.53	1	0	Solyc06g063370.2.1	50.3	0.999985	48.2108	cyr_090307_meja_05_2_bi5_p.01493.01493.2_34.706mins	1298.780945[-0.028651];1298.663544[0.088750];1298.688705[0.063589];1298.759827[-0.007533];1298.755798[-0.003504];1298.738037[0.014257];1298.654037[0.098257];1298.652313[0.099981];1298.708221[0.044073]	LTVLNLSITLNV/;ITVLNFQKSGL/Phospho (ST)[0000000002000];LTVISVSLAVFA/Phospho (ST)[00000200000000];ITVGIGFKLSPAP/;TLVQVAIRGLTE/;ITVRAMVIINPG/Oxidation (M)[00000010000000];DTPINCQPVLIS/;VDVIKGEXLSI/Phospho (ST)[0000000000200];VDVIGVVQSVSPT/	36.230000;26.270000;26.190000;25.450000;25.080000;24.970000;24.630000;23.790000;23.750000	0.000238;0.002360;0.002404;0.002851;0.003105;0.003184;0.003443;0.004178;0.000000	9.960000;0.080000;0.740000;0.370000;0.110000;0.340000;0.840000;0.040000;NA	0.000009332402;0.000000941875;0.000000924684;0.000000779818;0.000000716133;0.000000698222;0.000000645644;0.000000532100;0.000000527222	0.000041;0.000004;0.000004;0.000003;0.000003;0.000003;0.000003;0.000002;0.000002
query13107	1079.01	2156	2	2156	-0.000345	F	NKVNYANVSTNNYALDEVE	E	141	119	137			86.34	1	0	Solyc09g063130.2.1	67.76	0.999999	59.6842	cyr_090307_meja_05_2_bi3_p.01559.01559.2_36.335mins	2155.928970[0.072836];2155.928970[0.072836];2156.074966[-0.073160];2156.030319[-0.028513];2156.058823[-0.057017];2156.058823[-0.057017];2156.058823[-0.057017];2155.940170[0.061636];2156.015732[-0.013926]	MIFMGFMVMVPSKMAVPE/2 Oxidation (M) Phospho (ST)[00000000010020100000];MIFMGFMVMVPSKMAVPE/2 Oxidation (M) Phospho (ST)[00000001000020100000];FPSPSSSSITLTNVLNADAVH/;LYVDLATHFRGEIVNSDK/Phospho (ST)[00000002000000000000];EATLTSRLSSKDLAFIPMP/Phospho (ST)[000000200000000000000];EATLTSRLSSKDLAFIPMP/Phospho (ST)[000002000000000000000];EATLTSRLSSKDLAFIPMP/Phospho (ST)[000200000000000000000];TTANCQEFLMDVNA…	18.580000;18.580000;17.750000;16.990000;16.380000;16.380000;16.380000;16.120000;15.790000	0.013868;0.013868;0.016788;0.019999;0.023014;0.023014;0.023014;0.024434;0.000000	0.000000;0.830000;0.760000;0.610000;0.000000;0.000000;0.260000;0.330000;NA	0.000000167494;0.000000167494;0.000000138356;0.000000116145;0.000000100925;0.000000100925;0.000000100925;0.000000095060;0.000000088105	0.000001;0.000001;0.000001;0.000001;0.000000;0.000000;0.000000;0.000000;0.000000
query3813	644.384	1286.75	2	1286.73	0.018849	L;L	LSIAVGLPNIGPH	F;F	839	540	552			84.17	0	0	Solyc03g121540.2.1;Solyc06g062580.2.1	50.66	0.999988	49.1011	cyr_090307_meja_05_2_bi4_p.01874.01874.2_44.753mins	1286.687088[0.066426];1286.771027[-0.017513];1286.674759[0.078755];1286.705658[0.047856];1286.701630[0.051884];1286.673111[0.080403];1286.674744[0.078770];1286.682983[0.070531];1286.687042[0.066472]	DVVAVGIGGSFLGP/;TVIRALNPKYI/;SKKVIIQPSAX/Phospho (ST)[0000000002000];CPLAVAKIVPYN/;NAKLGGLNSMLAV/;LLSIGRQSHXN/;NKLSIPHKALS/Phospho (ST)[0000000000020];LEKLGLESREN/;PSGIVSIPYLQN/	33.510000;24.220000;22.930000;22.400000;19.730000;19.520000;17.350000;17.000000;16.690000	0.000446;0.003784;0.005093;0.005754;0.010641;0.011169;0.018408;0.019953;0.000000	9.290000;1.290000;0.530000;2.670000;0.210000;2.170000;0.350000;0.310000;NA	0.000008590030;0.000001011567;0.000000751614;0.000000665265;0.000000359745;0.000000342764;0.000000207967;0.000000191865;0.000000178647	0.000037;0.000004;0.000003;0.000003;0.000002;0.000001;0.000001;0.000001;0.000001
query16023	1251.64	2501.27	2	2501.24	0.027623	F;F	ASGSDENDVVVIGGGPGGYVAAIKAAQ	L;L	501	31	57			83.05	0	0	Solyc05g053300.2.1;Solyc12g099100.1.1	61.46	0.999998	57.1043	cyr_090307_meja_05_2_bi3_p.01806.01806.2_42.779mins	2501.292023[-0.024593];2501.350479[-0.083049];2501.291397[-0.023967];2501.284424[-0.016994];2501.258972[0.008458];2501.333664[-0.066234];2501.267471[-0.000041];2501.267471[-0.000041];2501.212082[0.055348]	QLYALTVGRSARLVATALRPVS/2 Phospho (ST)[000000000000000020000020];KLNYLRFKGVPLVGFVMVEYGG/Oxidation (M)[000000000000000001000000];QLFESNRANKXLSEYTSVFLQ/;KMSLTLFMKYGLVMNVNPRDL/2 Oxidation (M)[00000000100000100000000];KLIKKTKEHSRVMKEQKSQ/Oxidation (M) 2 Phospho (ST)[000000200000010000200];SRDQLGETSVIKTLASEIQVAEK/;MTSIAMKVVLDVIREQFTLVP/2 Oxidation (M) Phospho (ST)[01020010000000000000000];MTSIAMKVVLDVI…	21.590000;17.020000;16.460000;16.160000;14.090000;13.920000;13.370000;13.370000;12.850000	0.006934;0.019861;0.022594;0.024210;0.038994;0.040551;0.046026;0.046026;0.000000	4.570000;0.560000;0.300000;2.070000;0.170000;0.550000;0.000000;0.520000;NA	0.000000714495;0.000000249459;0.000000219280;0.000000204644;0.000000127057;0.000000122180;0.000000107646;0.000000107646;0.000000095499	0.000003;0.000001;0.000001;0.000001;0.000001;0.000001;0.000000;0.000000;0.000000
query15759	824.449	2470.33	3	2470.31	0.011849	K	AVEYVKSGMVLGLGTGSTAAFVVAK	L	294	73	97	Oxidation (M)	[000000000100000000000000000]	79.66	1	0	Solyc01g097460.2.1	72.26	1	64.4987	cyr_090307_meja_05_2_bi3_p.01765.01765.3_41.708mins	2470.248383[0.077629];2470.248383[0.077629];2470.270981[0.055031];2470.283279[0.042733];2470.333450[-0.007438];2470.302505[0.023507];2470.240555[0.085457];2470.270981[0.055031];2470.294434[0.031578]	SIASAWLTLAVGLKAFSHCGFLV/Phospho (ST)[0000200000000000000000000];SIASAWLTLAVGLKAFSHCGFLV/Phospho (ST)[0200000000000000000000000];QVVLVSQSGTVNRIKVRDISI/2 Phospho (ST)[00000000200000000000200];STKGVITDVVVALDGTGNFTRIK/Phospho (ST)[0000000200000000000000000];LINVQIPFTPMVYPAGPVVFATP/;KLYVVTNYLTKPHYLTKPVN/Phospho (ST)[0000000000200000000000];VKSTCLMVSVLSFTLLHGPPFV/Oxidation (M) Phospho (ST)[000000010200…	7.400000;7.400000;6.760000;5.630000;5.100000;4.530000;4.290000;4.020000;3.320000	0.181970;0.181970;0.210863;0.273527;0.309030;0.352371;0.372392;0.396278;0.000000	0.000000;0.640000;1.130000;0.530000;0.570000;0.240000;0.270000;0.700000;NA	0.000000059429;0.000000059429;0.000000051286;0.000000039537;0.000000034995;0.000000030690;0.000000029040;0.000000027290;0.000000023227	0.000000;0.000000;0.000000;0.000000;0.000000;0.000000;0.000000;0.000000;0.000000
query5311	719.445	1436.87	2	1436.84	0.035863	F	LEIAGLISPHFLK	-	147	134	146			78.24	1	0	Solyc01g107330.2.1	29.64	0.998599	28.5347	cyr_090307_meja_05_2_bi3_p.01956.01956.2_46.676mins	1436.857544[0.017430];1436.775177[0.099797];1436.885376[-0.010402];1436.787476[0.087498];1436.871445[0.003529];1436.932983[-0.058009];1436.782578[0.092396];1436.804367[0.070607];1436.792160[0.082814]	KINQIISPRXVN/;KNLSRELIGSKI/Phospho (ST)[00000000002000];IELKIILIDLPSA/;ELLEALTAIGATHV/;EIIERSLPKKPK/;ELQILIILKLNK/;GANKILLLLAKXT/Phospho (ST)[000000000000020];FELLPKLLKLSG/Phospho (ST)[00000000000200];NKLQLIIRAHEC/	48.600000;40.680000;36.160000;32.490000;31.140000;30.010000;28.060000;24.660000;24.660000	0.000014;0.000086;0.000242;0.000564;0.000769;0.000998;0.001563;0.003420;0.000000	7.920000;4.520000;3.670000;1.350000;1.130000;1.950000;3.400000;0.000000;NA	0.001084903223;0.000175142280;0.000061857306;0.000026569966;0.000019471123;0.000015010356;0.000009580562;0.000004379162;0.000004379162	0.004714;0.000761;0.000269;0.000115;0.000085;0.000065;0.000042;0.000019;0.000019
query4818	692.858	1383.7	2	1383.7	-0.002757	K	KFVENAATSFSIA	-	259	246	258			78.22	1	0	Solyc07g044860.2.1	52.23	0.999971	45.357	cyr_090307_meja_05_2_bi4_p.01650.01650.2_38.924mins	1383.639511[0.061147];1383.728577[-0.027919];1383.645279[0.055379];1383.639511[0.061147];1383.639511[0.061147];1383.611862[0.088796];1383.628296[0.072362];1383.628296[0.072362];1383.652649[0.048009]	VEKSSSVRGASPT/Phospho (ST)[000020000000000];VELAFLSTSFSAL/;QDMQVAATRFTT/Oxidation (M)[00010000000000];VEKSSSVRGASPT/Phospho (ST)[000000200000000];VEKSSSVRGASPT/Phospho (ST)[000002000000000];RFSFRRMSTT/Oxidation (M) Phospho (ST)[000200010000];TTAGLTAPGNSITT/Phospho (ST)[0020000000000000];TTAGLTAPGNSITT/Phospho (ST)[0200000000000000];KFNILSGTSMACP/Oxidation (M)[000000000010000]	25.990000;24.660000;24.270000;23.680000;23.680000;21.390000;21.010000;21.010000;20.780000	0.002518;0.003420;0.003741;0.004285;0.004285;0.007261;0.007925;0.007925;0.000000	1.330000;0.390000;0.590000;0.000000;2.290000;0.380000;0.000000;0.230000;NA	0.000005983942;0.000004405420;0.000004027053;0.000003515502;0.000003515502;0.000002074853;0.000001901023;0.000001901023;0.000001802965	0.000026;0.000019;0.000017;0.000015;0.000015;0.000009;0.000008;0.000008;0.000008
query10442	952.045	1902.08	2	1902.08	-0.006602	M	VLGLGTGSTAAFVVAKLGEL	L	294	82	101			75.72	1	0	Solyc01g097460.2.1	59.18	0.999995	52.6808	cyr_090307_meja_05_2_bi3_p.02287.02287.2_55.319mins	1902.047882[0.028142];1902.028442[0.047582];1902.021042[0.054982];1901.986343[0.089681];1902.070328[0.005696];1901.987183[0.088841];1902.106720[-0.030696];1902.008804[0.067220];1902.017899[0.058125]	LAVIGVTELVVGLLLEGQ/Phospho (ST)[00000002000000000000];ALDKAVVAAAEIMTLKXG/Oxidation (M)[00000000000001000000];DPGAAGYTIKEAVALARSL/;IGGAELGAGVAPTAVGAILVS/Phospho (ST)[00000000000002000000000];IGIVGLGSIGLKVAQRLE/Phospho (ST)[00000000200000000000];KVISMLRMDKLPKTF/Oxidation (M) Phospho (ST)[00000000100000200];KVVLVLSGVAGLGSLARAL/Phospho (ST)[000000020000000000000];KKVGKVTSFTTGKRASQ/Phospho (ST)[000000…	16.540000;14.900000;14.350000;13.900000;13.010000;12.810000;11.520000;10.830000;9.130000	0.022182;0.032359;0.036728;0.040738;0.050003;0.052360;0.070469;0.082604;0.000000	1.640000;0.550000;0.450000;0.890000;0.200000;1.290000;0.690000;1.700000;NA	0.000001207807;0.000000827938;0.000000729454;0.000000657654;0.000000535794;0.000000511679;0.000000380187;0.000000324338;0.000000219279	0.000005;0.000004;0.000003;0.000003;0.000002;0.000002;0.000002;0.000001;0.000001
query4790	692.374	1382.73	2	1382.79	-0.059535	F	LLYQEPVLGPVR	G	222	204	215			74.14	1	0	caseinbeta	46.91	0.999904	40.1768	cyr_090306_meja_005_bi9_2_p.01809.01809.2_39.624mins	1382.641769[0.090871];1382.648285[0.084355];1382.648285[0.084355];1382.648285[0.084355];1382.778244[-0.045604];1382.765671[-0.033031];1382.824509[-0.091869];1382.641754[0.090886];1382.641769[0.090871]	YKCGPPVRVSPT/Phospho (ST)[00000000000020];QSTSYPVLLAQP/Phospho (ST)[00002000000000];QSTSYPVLLAQP/Phospho (ST)[00020000000000];QSTSYPVLLAQP/Phospho (ST)[00200000000000];LLYKHGGPKRTN/;LIDALPNLEIVSS/;PTGLALAIEKKSR/;SWPGLKSQKCVA/Phospho (ST)[00000002000000];YKCGPPVRVSPT/Phospho (ST)[00000000002000]	27.230000;26.180000;26.180000;26.180000;24.040000;22.460000;20.250000;19.600000;19.580000	0.001892;0.002410;0.002410;0.002410;0.003945;0.005675;0.009441;0.010965;0.000000	1.050000;0.000000;0.000000;2.140000;1.580000;2.210000;0.650000;0.020000;NA	0.000020368465;0.000015994045;0.000015994045;0.000015994045;0.000009771434;0.000006791384;0.000004082802;0.000003515267;0.000003499116	0.000088;0.000069;0.000069;0.000069;0.000042;0.000029;0.000018;0.000015;0.000015
query4086	656.354	1310.69	2	1310.67	0.021932	A;A	SSYADELVKTAK	T;T	396	46	57			73.52	0	0	Solyc02g062340.2.1;Solyc02g084440.2.1	31.99	0.999329	31.734	cyr_090307_meja_05_2_bi4_p.01357.01357.2_31.278mins	1310.611877[0.081823];1310.672668[0.021032];1310.688690[0.005010];1310.667557[0.026143];1310.672668[0.021032];1310.623108[0.070592];1310.617615[0.076085];1310.616608[0.077092];1310.692062[0.001638]	QSLDELINTAK/Phospho (ST)[0020000000000];GAMFVMIVKGDK/Oxidation (M)[00000010000000];SVAAPIFILLTS/Phospho (ST)[02000000000000];HSILLIFEFL/Phospho (ST)[002000000000];GAMFVMIVKGDK/Oxidation (M)[00010000000000];NLDTELARATK/Phospho (ST)[0000200000000];MYNEDIKSIAQ/;NVGLQRVQSCK/Phospho (ST)[0000000002000];CLVGSLILLLTS/Phospho (ST)[00000200000000]	41.530000;25.000000;21.870000;19.490000;19.000000;18.710000;18.020000;17.640000;15.980000	0.000070;0.003162;0.006501;0.011246;0.012589;0.013459;0.015776;0.017219;0.000000	16.530000;3.130000;2.380000;0.490000;0.290000;0.690000;0.380000;1.660000;NA	0.000631987621;0.000014051043;0.000006834529;0.000003951014;0.000003529462;0.000003301479;0.000002816492;0.000002580528;0.000001760794	0.002746;0.000061;0.000030;0.000017;0.000015;0.000014;0.000012;0.000011;0.000008
query6462	786.369	1570.72	2	1570.74	-0.015041	F;F	NKVNYANVSTNNYA	L;L	139	118	131			73.19	0	0	Solyc06g083680.2.1;Solyc09g063130.2.1	48.79	0.999977	46.4643	cyr_090307_meja_05_2_bi3_p.01271.01271.2_28.817mins	1570.702820[0.019688];1570.642471[0.080037];1570.642471[0.080037];1570.683456[0.039052];1570.702835[0.019673];1570.642471[0.080037];1570.724808[-0.002300];1570.798050[-0.075542];1570.770126[-0.047618]	QNVTLNNDLLNYA/Phospho (ST)[000020000000000];ELVMVAKTSLSSM/Oxidation (M) 2 Phospho (ST)[000000000202010];ELVMVAKTSLSSM/Oxidation (M) 2 Phospho (ST)[000000002002010];KNSAGFGGMSTTHNF/Oxidation (M)[00000000010000000];ATNNVPIIDAPETH/Phospho (ST)[0020000000000000];ELVMVAKTSLSSM/Oxidation (M) 2 Phospho (ST)[000000002200010];ATERMVEKKISCP/Phospho (ST)[002000000000000];KNTRAILLNTPHN/Phospho (ST)[000200000…	24.400000;15.480000;15.480000;14.800000;13.890000;12.930000;12.880000;11.870000;11.860000	0.003631;0.028314;0.028314;0.033113;0.040832;0.050933;0.051523;0.065013;0.000000	8.920000;0.000000;0.680000;0.910000;0.960000;0.050000;1.010000;0.010000;NA	0.000013212658;0.000001694300;0.000001694300;0.000001448739;0.000001174871;0.000000941868;0.000000931087;0.000000737888;0.000000736190	0.000057;0.000007;0.000007;0.000006;0.000005;0.000004;0.000004;0.000003;0.000003
query7494	825.918	1649.82	2	1649.81	0.006933	M	EGVETFDIDLKEQK	V	82	28	41			72.53	1	0	Solyc05g055310.2.1	51.21	0.999959	43.823	cyr_090306_meja_005_bi6_2_p.01559.01559.2_36.661mins	1649.723251[0.098501];1649.858612[-0.036860];1649.724899[0.096853];1649.724899[0.096853];1649.921265[-0.099513];1649.864075[-0.042323];1649.827698[-0.005946];1649.897751[-0.075999];1649.829437[-0.007685]	KGCRSIDIDDPHSK/Phospho (ST)[0000000000000200];CLSIVFDLDETLIVA/;SPMSVKTDIQRTK/2 Phospho (ST)[020000020000000];SPMSVKTDIQRTK/2 Phospho (ST)[020020000000000];KRKHVEEVLQEKQ/;ISLTSVPVIEXEGAK/Phospho (ST)[00000200000000000];ISLTSVPVIEXEGAK/Phospho (ST)[00000200000000000];REVLLSRKGKEKQ/Phospho (ST)[000000200000000];LDLSSMTNQTIKLGGG/Oxidation (M)[000000100000000000]	21.320000;20.010000;19.240000;19.240000;18.950000;18.390000;18.390000;18.260000;17.430000	0.007379;0.009977;0.011912;0.011912;0.012735;0.014488;0.014488;0.014928;0.000000	1.310000;0.770000;0.000000;0.290000;0.560000;0.000000;0.130000;0.830000;NA	0.000007568015;0.000005597344;0.000004687939;0.000004687939;0.000004385125;0.000003854624;0.000003854624;0.000003740951;0.000003090167	0.000033;0.000024;0.000020;0.000020;0.000019;0.000017;0.000017;0.000016;0.000013
query3359	626.304	1250.59	2	1250.6	-0.009685	M	EGVESFDIDIK	E	114	28	38			72.3	1	0	Solyc11g007200.1.1	44.12	0.999872	38.9438	cyr_090307_meja_05_2_bi5_p.01707.01707.2_40.281mins	1250.581238[0.012120];1250.566650[0.026708];1250.614258[-0.020900];1250.615128[-0.021770];1250.570023[0.023335];1250.621658[-0.028300];1250.661865[-0.068507];1250.566681[0.026677];1250.658051[-0.064693]	EERSMELTQL/Oxidation (M)[000001000000];ELQDYDLDLQ/;ERESYEVVIQ/;ERFICDMPIK/;VEVSSMDLENL/Oxidation (M)[0000001000000];EKLMFDLQVE/;ERSFEGKASKL/;TDDFGLDLDAVA/;MVALSYLVDGLA/	28.180000;25.090000;24.890000;24.320000;23.660000;22.760000;18.110000;17.850000;17.790000	0.001521;0.003097;0.003243;0.003698;0.004305;0.005297;0.015453;0.016406;0.000000	3.090000;0.200000;0.570000;0.660000;0.900000;4.650000;0.260000;0.060000;NA	0.000038720826;0.000019008358;0.000018152841;0.000015920057;0.000013675544;0.000011115899;0.000003810172;0.000003588762;0.000003539522	0.000168;0.000083;0.000079;0.000069;0.000059;0.000048;0.000017;0.000016;0.000015
query4993	467.987	1400.94	3	1400.89	0.053536	Q	KVQLILNHVIPK	F	248	103	114			70.46	1	0	Solyc07g053540.1.1	48.23	0.999949	42.8942	cyr_090307_meja_05_2_bi3_p.01546.01546.3_36.005mins	1400.853683[0.086587];1400.886719[0.053551];1400.850342[0.089928];1400.911865[0.028405];1400.875488[0.064782];1400.890076[0.050194];1400.853699[0.086571];1400.875504[0.064766];1400.886734[0.053536]	KNLIIIREKMK/Oxidation (M)[0000000000100];KSHLIKLLPQPX/;KSHLIKLLPQPX/;NKILLLLAKXTF/;NKILLLLAKXTF/;KDLLKKMRXLI/Oxidation (M)[0000000100000];KDLLKKMRXLI/Oxidation (M)[0000000100000];KDPPIPAVKVPLK/;KQILVNLHIVPK/	22.230000;19.260000;19.260000;17.500000;17.500000;15.350000;15.350000;14.820000;13.770000	0.005984;0.011858;0.011858;0.017783;0.017783;0.029174;0.029174;0.032961;0.000000	2.970000;0.000000;1.760000;0.000000;2.150000;0.000000;0.530000;1.050000;NA	0.000015030648;0.000007585386;0.000007585386;0.000005057987;0.000005057987;0.000003083030;0.000003083030;0.000002728838;0.000002142781	0.000065;0.000033;0.000033;0.000022;0.000022;0.000013;0.000013;0.000012;0.000009
query6227	770.961	1539.91	2	1539.89	0.020879	K;K	ENLELIVGLVKEGK	L;L	275	227	240			69.64	0	0	Solyc09g059020.2.1;Solyc09g059030.2.1	31	0.998577	28.4667	cyr_090307_meja_05_2_bi5_p.01856.01856.2_44.166mins	1539.825653[0.082403];1539.898422[0.009634];1539.817413[0.090643];1539.858200[0.049856];1539.946030[-0.037974];1539.895920[0.012136];1539.873230[0.034826];1539.852127[0.055929];1539.840912[0.067144]	EGVAEIVLDRVINN/;GALEDLLRVIVTNK/;TRFNIVLGTAKGLA/Phospho (ST)[0200000000000000];DLQELLPSAIIMVV/;KQSAALIGGRSKIVL/;LRSFVLLMLXIAQ/;EARNKLQLEIKAQ/;SRLEIIRXEAHVF/;QFQKIPSLLDSHK/	38.640000;35.850000;27.860000;24.580000;24.160000;23.470000;23.290000;22.810000;22.500000	0.000137;0.000260;0.001637;0.003483;0.003837;0.004498;0.004688;0.005236;0.000000	2.790000;7.990000;3.280000;0.420000;0.690000;0.180000;0.480000;0.310000;NA	0.000793197585;0.000417235625;0.000066279830;0.000031144501;0.000028273618;0.000024120227;0.000023140961;0.000020719601;0.000019292183	0.003446;0.001812;0.000288;0.000135;0.000123;0.000105;0.000101;0.000090;0.000084
query6590	789.869	1577.72	2	1577.72	-0.000849	A;A;A	KYGDKSVYFDLED	L;L;L	146	51	63			68.21	0	0	Solyc03g120640.2.1;Solyc06g066640.2.1;Solyc12g044280.1.1	40.8	0.999776	36.4968	cyr_090306_meja_005_bi6_2_p.01582.01582.2_37.276mins	1577.772568[-0.048472];1577.655548[0.068548];1577.746078[-0.021982];1577.823547[-0.099451];1577.712662[0.011434];1577.703171[0.020925];1577.775940[-0.051844];1577.699371[0.024725];1577.783798[-0.059702]	KNGKDIWVFDIDE/;EVFQGESCPPELED/;SLTSDLIAWTDIED/;KQLAKRFDTDLMP/Oxidation (M)[000000000000100];QDGYHNLLLSLEP/Phospho (ST)[000000000020000];QAQCNFVSLPDLED/;KGLSSMISGNPDIPF/Oxidation (M)[00000010000000000];DFIDMVTVTFMDL/2 Oxidation (M)[000001000001000];KERSTHVFXFIED/	27.410000;25.350000;22.460000;19.500000;19.160000;18.860000;17.680000;17.660000;16.880000	0.001816;0.002917;0.005675;0.011220;0.012134;0.013002;0.017061;0.017140;0.000000	2.060000;2.890000;2.960000;0.340000;0.300000;1.180000;0.020000;0.780000;NA	0.000083157743;0.000051749087;0.000026601290;0.000013455588;0.000012442358;0.000011611884;0.000008849173;0.000008808515;0.000007360422	0.000361;0.000225;0.000116;0.000058;0.000054;0.000050;0.000038;0.000038;0.000032
query10727	644.011	1929.01	3	1928.96	0.050666	L	EGRSTPVKFSAHLKEDE	F	172	150	166			67.73	1	0	Solyc01g087520.2.1	50.91	0.999945	42.6286	cyr_090307_meja_05_2_bi4_p.01182.01182.3_26.690mins	1929.019653[-0.009804];1929.002960[0.006889];1928.911392[0.098457];1929.037613[-0.027764];1928.918976[0.090873];1928.928497[0.081352];1929.002975[0.006874];1928.913239[0.096610];1928.955124[0.054725]	KDKVKKSNKFSKNGKN/Phospho (ST)[000000000002000000];KMFLHALSELIQGASTPS/;KYGQSNHLMRRMVLT/Oxidation (M) Phospho (ST)[00000000010000020];GAQTKKIKIEYTLIFP/Phospho (ST)[000000000000200000];KLLQEDKMDVYGTTSW/Oxidation (M)[000000001000000000];LASFIENFGTHIITSVT/Phospho (ST)[0002000000000000000];IEGNTLVKMGTYRYIGV/Oxidation (M)[0000000001000000000];KATIGVEFQTQTLEIDG/Phospho (ST)[0000000000002000000];KAEEIKRIS…	16.820000;16.480000;15.940000;15.750000;15.720000;15.500000;14.410000;14.410000;14.200000	0.020797;0.022491;0.025468;0.026607;0.026792;0.028184;0.036224;0.036224;0.000000	0.340000;0.540000;0.190000;0.030000;0.220000;1.090000;0.000000;0.210000;NA	0.000008109168;0.000007498533;0.000006621804;0.000006338351;0.000006294718;0.000005983789;0.000004655607;0.000004655607;0.000004435844	0.000035;0.000033;0.000029;0.000028;0.000027;0.000026;0.000020;0.000020;0.000019
query10052	934.017	1866.02	2	1866.05	-0.027643	E	LAAVKINAADIDIIANEL	E	111	66	83			67.04	1	0	Solyc12g099240.1.1	35.38	0.999577	33.7384	cyr_090307_meja_05_2_bi3_p.02117.02117.2_50.870mins	1866.093842[-0.075312];1865.949951[0.068579];1866.046204[-0.027674];1866.068634[-0.050104];1866.068695[-0.050165];1866.068649[-0.050119];1865.990356[0.028174];1865.990356[0.028174];1866.015671[0.002859]	GVVVLAGTNRLDILDKAL/;QSAIGAKTEVIDKQVTV/Phospho (ST)[0000000020000000000];LEVSVAPAAVSNGLLGLEK/;LAAAGEGVRELKLLANKX/;AVLQRSGRDVILINVDV/;RSIALIAERSPNLQVLS/;ATSLLTWLVLDIAVSGK/Phospho (ST)[0002000000000000000];ATSLLTWLVLDIAVSGK/Phospho (ST)[0020000000000000000];SRSPARGRGSPRRRSPS/	31.660000;25.230000;18.440000;16.910000;16.890000;16.660000;16.320000;16.320000;16.110000	0.000682;0.002999;0.014322;0.020370;0.020464;0.021577;0.023335;0.023335;0.000000	6.430000;6.790000;1.530000;0.020000;0.230000;0.340000;0.000000;0.210000;NA	0.000289611853;0.000065889518;0.000013798006;0.000009700996;0.000009656424;0.000009158331;0.000008468692;0.000008468692;0.000008068937	0.001258;0.000286;0.000060;0.000042;0.000042;0.000040;0.000037;0.000037;0.000035
query8795	876.015	1750.01	2	1750	0.011586	D	PPLAVFQLDKVLVPSQ	F	248	170	185			66.99	1	0	Solyc07g053540.1.1	28.55	0.998417	28.0051	cyr_090307_meja_05_2_bi3_p.02145.02145.2_51.602mins	1749.944717[0.069783];1750.000504[0.013996];1749.921219[0.093281];1750.024033[-0.009533];1749.984940[0.029560];1750.024002[-0.009502];1749.925049[0.089451];1750.032562[-0.018062];1749.998901[0.015599]	IARIKSTDIKMFPSQ/Oxidation (M)[00000000000100000];KTTPKSLQTIKLLSI/Phospho (ST)[00000020000000000];SSLMPRTKGGLLVPSK/Phospho (ST)[000000020000000000];IVLLVSDKIEGPGVSPK/;SSRVNLISHLREVLQ/;TKLSSIVSFLKESIAK/;RKRKVSEDKVQLGQ/Phospho (ST)[0000002000000000];ERRNLRVKGVLVTNP/;REEGVVPDKVVLVNVV/	38.440000;25.020000;21.900000;20.720000;18.830000;18.750000;18.370000;18.300000;18.300000	0.000143;0.003148;0.006457;0.008472;0.013092;0.013335;0.014555;0.014791;0.000000	13.420000;3.120000;1.180000;1.890000;0.080000;0.380000;0.070000;0.000000;NA	0.001394157875;0.000063432519;0.000030925160;0.000023567415;0.000015251479;0.000014973108;0.000013718668;0.000013499322;0.000013499322	0.006059;0.000275;0.000134;0.000102;0.000066;0.000065;0.000060;0.000059;0.000059
query8183	853.472	1704.93	2	1704.86	0.071142	L	IMVTSTSLMLFAGRF	G	131	56	70	2 Oxidation (M)	[00100000010000000]	66.89	1	0	Solyc08g006930.2.1	42.36	0.99984	37.9635	cyr_090307_meja_05_2_bi4_p.02014.02014.2_48.404mins	1704.941025[-0.011973];1704.865082[0.063970];1704.868256[0.060796];1704.912689[0.016363];1704.977417[-0.048365];1704.872299[0.056753];1704.840912[0.088140];1704.937836[-0.008784];1704.879486[0.049566]	PVYSTSLREIVTVKN/;KMQSPIDISSCRVKN/;SDGIVERYLDPTVKN/;IEQISKRCMRTVKN/;TGYILTIVDLRTVNK/;FILSSTSTFRFTGIE/;SSSTSATLLCLFLLLG/Phospho (ST)[000000020000000000];LNKGNMMKIKSTVKN/;DKVETRKLSTSQQW/	24.530000;21.390000;19.470000;18.710000;16.790000;16.570000;15.760000;15.370000;14.990000	0.003524;0.007261;0.011298;0.013459;0.020941;0.022029;0.026546;0.029040;0.000000	3.140000;1.920000;0.760000;1.920000;0.220000;0.810000;0.390000;0.380000;NA	0.000058067160;0.000028179325;0.000018110506;0.000015203045;0.000009770810;0.000009288179;0.000007707803;0.000007045804;0.000006455510	0.000252;0.000122;0.000079;0.000066;0.000042;0.000040;0.000033;0.000031;0.000028
query8259	856.516	1711.02	2	1711.02	-0.001536	Q	KVQLILNHVIPKFY	T	248	103	116			66.04	1	0	Solyc07g053540.1.1	42.59	0.999816	37.3456	cyr_090307_meja_05_2_bi4_p.01825.01825.2_43.478mins	1710.921738[0.095204];1711.003876[0.013066];1710.991974[0.024968];1710.982101[0.034841];1710.923920[0.093022];1710.926437[0.090505];1711.014450[0.002492];1711.014465[0.002477];1710.981430[0.035512]	KTFPLVLACLMAVII/Phospho (ST)[00200000000000000];QPEAKLRRRKMLLG/Oxidation (M)[0000000000010000];KKYNLSIVVLASIYT/;FRYSIVPFGGSKILK/;QPKAELRMPHPLPPT/;QPVTQLSATISAPRKD/;VKTKVSRFLIAAELH/;ANVRLTPPVLPPKPVN/;QVLKKAMAAALTSHKV/Oxidation (M)[000000010000000000]	23.450000;20.690000;19.270000;18.820000;18.100000;18.100000;16.160000;16.040000;14.860000	0.004519;0.008531;0.011830;0.013122;0.015488;0.015488;0.024210;0.024889;0.000000	2.760000;1.420000;0.450000;0.720000;0.000000;1.940000;0.120000;1.180000;NA	0.000055070620;0.000029168894;0.000021033908;0.000018963564;0.000016066451;0.000016066451;0.000010278269;0.000009998157;0.000007619386	0.000239;0.000127;0.000091;0.000082;0.000070;0.000070;0.000045;0.000043;0.000033
query5178	712.398	1422.78	2	1422.71	0.066167	L	AFIPGNFSVSAGEK	I	171	84	97			65.32	1	0	Solyc04g082010.1.1	44.01	0.999851	38.2753	cyr_090307_meja_05_2_bi3_p.01687.01687.2_39.669mins	1422.748337[0.032155];1422.752365[0.028127];1422.755722[0.024770];1422.826843[-0.046351];1422.775864[0.004628];1422.754074[0.026418];1422.771820[0.008672];1422.808228[-0.027736];1422.773453[0.007039]	SAVAQKVISQLVT/Phospho (ST)[020000000000000];KFQTLPSIPLXT/Phospho (ST)[00000002000000];KTXAALILMPIVT/Oxidation (M) Phospho (ST)[002000000100000];KTXAALILMPIVT/Oxidation (M)[000000000100000];LGFTKYLDGPLLS/;MSPSKVLKGVQYX/Oxidation (M)[010000000000000];IEAELGPEPRIVT/;AGVAPALSPLSAGLVT/;ELTLKIVSKIEA/Phospho (ST)[00020000000000]	21.310000;18.060000;17.360000;17.360000;16.630000;16.490000;16.240000;15.460000;14.850000	0.007396;0.015631;0.018365;0.018365;0.021727;0.022439;0.023768;0.028445;0.000000	3.250000;0.700000;0.000000;0.730000;0.140000;0.250000;0.780000;0.610000;NA	0.000039713247;0.000018790373;0.000015993201;0.000015993201;0.000013518714;0.000013089872;0.000012357636;0.000010326078;0.000008972953	0.000172;0.000082;0.000069;0.000069;0.000059;0.000057;0.000054;0.000045;0.000039
query14358	1152.56	2303.11	2	2303.07	0.042074	R	FNKVNYANVSTNNYALDEVE	E	141	118	137			64.74	1	0	Solyc09g063130.2.1	48.41	0.999927	41.3567	cyr_090307_meja_05_2_bi5_p.01616.01616.2_37.913mins	2303.105469[0.007177];2303.105469[0.007177];2303.111984[0.000662];2303.111984[0.000662];2303.053238[0.059408];2303.202393[-0.089747];2303.111984[0.000662];2303.111984[0.000662];2303.107635[0.005011]	IVNLHGLTKNLPSACTSVMEP/Phospho (ST)[00000000000002000000000];IVNLHGLTKNLPSACTSVMEP/Phospho (ST)[00000000200000000000000];SSPTALSLLLRSSMFQELVE/Oxidation (M) Phospho (ST)[0000000200000010000000];SSPTALSLLLRSSMFQELVE/Oxidation (M) Phospho (ST)[0000200000000010000000];KRSQKRANVNSNTLGGQSGAA/2 Phospho (ST)[00020000000000000020000];MPIAVYVLFYFINPKSTRE/Oxidation (M)[010000000000000000000];SSPTALSLLLRSSMFQ…	16.330000;16.330000;14.030000;14.030000;13.340000;11.900000;11.790000;11.790000;11.520000	0.023281;0.023281;0.039537;0.039537;0.046345;0.064565;0.066222;0.066222;0.000000	0.000000;2.300000;0.000000;0.690000;1.440000;0.110000;0.000000;0.270000;NA	0.000014420098;0.000014420098;0.000008491183;0.000008491183;0.000007243830;0.000005199579;0.000005069536;0.000005069536;0.000004763961	0.000063;0.000063;0.000037;0.000037;0.000031;0.000023;0.000022;0.000022;0.000021
query6984	806.915	1611.82	2	1611.79	0.022588	Q;Q	APQEKGFAAFATDFL	M;M	387	77	91			64.73	0	0	Solyc11g062130.1.1;Solyc11g062190.1.1	44.72	0.99986	38.538	cyr_090307_meja_05_2_bi3_p.02154.02154.2_51.836mins	1611.732346[0.083546];1611.855835[-0.039943];1611.739182[0.076710];1611.800049[0.015843];1611.848328[-0.032436];1611.784393[0.031499];1611.887177[-0.071285];1611.740585[0.075307];1611.719421[0.096471]	RAAAFAKRSQSFI/2 Phospho (ST)[000000000202000];IISTALMTIGIAIVT/Oxidation (M) Phospho (ST)[00020001000000000];HPTVMFADNSSFLF/;KXQIGAVTAMETGLF/Oxidation (M)[00000000001000000];QVWKSVTFAALCFL/;IISATQHMLSRIF/Oxidation (M) Phospho (ST)[000200001000000];KKKXLSELGATDFL/;EARINEANVTRXY/Phospho (ST)[000000000020000];MAVEAVVEDGLTMMT/Oxidation (M)[00000000000000100]	20.010000;18.110000;17.920000;15.770000;15.620000;15.460000;15.460000;13.580000;13.410000	0.009977;0.015453;0.016144;0.026485;0.027416;0.028445;0.028445;0.043853;0.000000	1.900000;0.190000;2.150000;0.150000;0.160000;0.000000;1.880000;0.170000;NA	0.000033724008;0.000021774048;0.000020841990;0.000012703962;0.000012272674;0.000011828759;0.000011828759;0.000007672540;0.000007378009	0.000146;0.000095;0.000091;0.000055;0.000053;0.000051;0.000051;0.000033;0.000032
query10702	964.983	1927.95	2	1927.89	0.059758	F;F	NKVNYANVSTNNYALDE	I;V	139	118	134			63.34	0	0	Solyc06g083680.2.1;Solyc09g063130.2.1	47.62	0.999944	42.5203	cyr_090307_meja_05_2_bi5_p.01452.01452.2_33.634mins	1927.919327[0.031575];1927.871033[0.079869];1927.928238[0.022664];1927.892853[0.058049];1927.918610[0.032292];1927.929214[0.021688];1927.929214[0.021688];1927.918610[0.032292];1927.919693[0.031209]	PPTGPGPAPSNVASRSFIP/Phospho (ST)[000200000000000000000];QTKATNRVVTMINEDE/Phospho (ST)[000002000000000000];DMLSRGQVEHVRSERN/Oxidation (M)[001000000000000000];VSFGSLAAAVSSGASGPPTSV/Phospho (ST)[00000000000000000002000];KLSKNLQSIMARNSEN/Oxidation (M) Phospho (ST)[000000002010000000];IDLSKNDFSGKIPSTLGG/Phospho (ST)[00000000000000020000];IDLSKNDFSGKIPSTLGG/Phospho (ST)[00000000000000200000];KLSKNLQSIM…	15.720000;11.860000;10.750000;10.720000;9.850000;9.440000;9.440000;9.360000;9.320000	0.026792;0.065163;0.084140;0.084723;0.103514;0.113763;0.113763;0.115878;0.000000	3.860000;1.110000;0.030000;0.870000;0.410000;0.000000;0.080000;0.040000;NA	0.000017297195;0.000007111737;0.000005507769;0.000005469853;0.000004476882;0.000004073575;0.000004073575;0.000003999224;0.000003962559	0.000075;0.000031;0.000024;0.000024;0.000019;0.000018;0.000018;0.000017;0.000017
query9553	913.023	1824.03	2	1824.05	-0.015407	M	VLNEANLTNAVLVRSVL	T	265	159	175			62.46	1	0	Solyc08g079110.2.1	36.27	0.999518	33.1699	cyr_090307_meja_05_2_bi3_p.01996.01996.2_47.727mins	1823.962891[0.068577];1824.021713[0.009755];1823.963745[0.067723];1823.952133[0.079335];1823.966919[0.064549];1823.946777[0.084691];1823.946777[0.084691];1824.083237[-0.051769];1824.060806[-0.029338]	KSVLVDDVKSLTSRXD/;GLERGQLSLANLLDIGR/;FMTMITLITSLVRANN/;PIFQGLMKSGIRVWI/Phospho (ST)[00000000020000000];ISLSGYFSGLNIVVGIDA/;ASMLLGLGGASILQTVTI/Phospho (ST)[00000000000000000200];ASMLLGLGGASILQTVTI/Phospho (ST)[00000000000000020000];LLDQKEAGKRLLLITN/;VITEDIKAGLVLVDIIN/	26.190000;21.130000;20.460000;18.010000;16.160000;13.770000;13.770000;13.150000;13.000000	0.002404;0.007709;0.008995;0.015812;0.024210;0.041976;0.041976;0.048417;0.000000	5.060000;0.670000;2.450000;1.850000;2.390000;0.000000;0.620000;0.150000;NA	0.000235934059;0.000073585228;0.000063065325;0.000035874895;0.000023430990;0.000013514209;0.000013514209;0.000011716304;0.000011318546	0.001025;0.000320;0.000274;0.000156;0.000102;0.000059;0.000059;0.000051;0.000049
query7782	834.908	1667.8	2	1667.78	0.018697	L	VGDYGFDPFGLGKPAE	Y	286	67	82			61.53	1	0	Solyc09g014520.2.1	40.32	0.999698	35.2025	cyr_090307_meja_05_2_bi7_p.01931.01931.2_46.000mins	1667.718735[0.083119];1667.730469[0.071385];1667.730469[0.071385];1667.837952[-0.036098];1667.851852[-0.049998];1667.830780[-0.028926];1667.708649[0.093205];1667.847031[-0.045177];1667.807632[-0.005778]	VCLEKLMDSYSSTI/Phospho (ST)[0000000002000000];QGISDVAFSSDGRHL/Phospho (ST)[00000000020000000];QGISDVAFSSDGRHL/Phospho (ST)[00000000002000000];QGGSNGIGYGLKYQAR/;KGFRSIPEDESYLK/;FSTGGRVLDPFWSSL/;KCASESNRGLSGKHD/Phospho (ST)[00002000000000000];PTGRIVMGLFGKTVP/Oxidation (M) Phospho (ST)[00200001000000000];SPSNALTFLVMSESLG/Oxidation (M)[000000000001000000]	21.210000;19.170000;17.690000;14.900000;14.460000;14.140000;14.070000;13.960000;13.170000	0.007568;0.012106;0.017022;0.032359;0.035810;0.038548;0.039174;0.040179;0.000000	2.040000;1.480000;2.790000;0.440000;0.320000;0.070000;0.110000;0.790000;NA	0.000092868601;0.000058058913;0.000041292284;0.000021720454;0.000019627677;0.000018233452;0.000017941919;0.000017493185;0.000014583740	0.000403;0.000252;0.000179;0.000094;0.000085;0.000079;0.000078;0.000076;0.000063
query3534	633.335	1264.66	2	1264.62	0.037648	M	EGVETFDIDLK	E	82	28	38			60.28	1	0	Solyc05g055310.2.1	31.4	0.997741	26.46	cyr_090307_meja_05_2_bi8_p.01831.01831.2_40.932mins	1264.624069[0.032277];1264.589508[0.066838];1264.652573[0.003773];1264.608124[0.048222];1264.563507[0.092839];1264.574066[0.082280];1264.666306[-0.009960];1264.667938[-0.011592];1264.582993[0.073353]	NNWTFFPVLQ/;SNAAATSSTTNQL/;CIFWLDIDIK/;REETQMQLSK/Oxidation (M)[000000100000];MANTGKHVSIQ/Phospho (ST)[0000000002000];KTSSXFLDLQ/Phospho (ST)[000020000000];SKAKTFDIQDL/;TLAETLSPIKI/Phospho (ST)[0000000200000];SMRQGSGAQLSQ/Oxidation (M)[00100000000000]	28.880000;27.310000;24.260000;24.020000;22.060000;21.560000;20.330000;19.400000;19.370000	0.001294;0.001858;0.003750;0.003963;0.006223;0.006982;0.009268;0.011482;0.000000	1.570000;3.050000;0.240000;1.960000;0.500000;1.230000;0.930000;0.030000;NA	0.000722799129;0.000503521037;0.000249469594;0.000236057400;0.000150320295;0.000133973104;0.000100929383;0.000081473734;0.000080912873	0.003140;0.002187;0.001084;0.001025;0.000653;0.000582;0.000438;0.000354;0.000351
query13420	1093.59	2185.17	2	2185.16	0.011678	R	DMPIQAFLLYQEPVLGPVR	G	222	197	215			59.23	1	0	caseinbeta	42.69	0.99966	34.6852	cyr_090306_meja_005_bi9_2_p.02490.02490.2_55.032mins	2185.192902[-0.020686];2185.129639[0.042577];2185.129608[0.042608];2185.129608[0.042608];2185.272171[-0.099955];2185.107162[0.065054];2185.200775[-0.028559];2185.151154[0.021062];2185.125809[0.046407]	RKSGQVMGFTILLQKITYS/Oxidation (M)[000000010000000000000];RLTGAYRLFGSEVLGGLLPS/Phospho (ST)[0000000000000000000020];VKVRSSNLKYLLGENWIS/Phospho (ST)[00000020000000000000];VKVRSSNLKYLLGENWIS/Phospho (ST)[00000200000000000000];ETKLALLPYIGALTNVATKAV/;ELKNGYVSFLALVPELTVN/Phospho (ST)[000000000000000002000];LLGVDGTVHHKLLADHYGLK/;LMLGLQMLLIMSLRLVMV/2 Oxidation (M) Phospho (ST)[00000001000020000100];FGATL…	16.540000;16.540000;16.540000;16.540000;14.060000;13.150000;13.060000;13.060000;12.540000	0.022182;0.022182;0.022182;0.022182;0.039264;0.048417;0.049431;0.049431;0.000000	0.000000;0.000000;0.000000;2.480000;0.910000;0.090000;0.000000;0.520000;NA	0.000053808677;0.000053808677;0.000053808677;0.000053808677;0.000030398511;0.000024652009;0.000024146396;0.000024146396;0.000021421620	0.000234;0.000234;0.000234;0.000234;0.000132;0.000107;0.000105;0.000105;0.000093
query7243	815.948	1629.88	2	1629.88	0.00057	S	MTNLNLPSIFVPLVG	L	73	37	51	Oxidation (M)	[01000000000000000]	58.97	1	0	Solyc01g007350.2.1	36.78	0.999482	32.8528	cyr_090307_meja_05_2_bi4_p.02394.02394.2_58.174mins	1629.807907[0.072683];1629.846130[0.034460];1629.945374[-0.064784];1629.850815[0.029775];1629.909653[-0.029063];1629.783737[0.096853];1629.891235[-0.010645];1629.849106[0.031484];1629.808594[0.071996]	REVVMMSRVKHEN/Oxidation (M)[000001000000000];LSALVEVTDLDQLNT/;LVLSAFLALRAAVETG/;NNRMDLLALLTSGVN/;KKARMKTRTEHKT/Oxidation (M)[000001000000000];ITQVMLEKGTNFIG/Phospho (ST)[0000000000200000];PIFNTLDKAMLPVR/Oxidation (M)[0000000000100000];KILHGPTTLKSASPT/Phospho (ST)[00000000200000000];TAHMAGGFNIFVHKT/	22.190000;17.610000;15.560000;15.270000;14.570000;14.430000;13.740000;12.920000;12.230000	0.006039;0.017338;0.027797;0.029717;0.034914;0.036058;0.042267;0.051050;0.000000	4.580000;2.050000;0.290000;0.700000;0.140000;0.690000;0.820000;0.690000;NA	0.000209785164;0.000073076001;0.000045580047;0.000042635835;0.000036288981;0.000035137817;0.000029976075;0.000024818457;0.000021172628	0.000911;0.000317;0.000198;0.000185;0.000158;0.000153;0.000130;0.000108;0.000092

## Sheet: DS_unique peptides_105
Table S-4, (Peptides Identified by DS)
Query Number	Observed m/z	Observed MW	Observed Charge State	Theoretical MW	MW Error	Residue Before	Seq	Residue After	Protein Length	From	to	Modification	Mod Location	Mascot Score	Unique	Missed Cleavage	Accession	DS	Contribution Fraction C1	CS	Title	Subranked Theoretical MW[Error]	Subranked Seq/Mod[Loc]	Subranked Mascot Scores	Subranked Random Matched Probabilities	Subranked MDScores	Subranked Contibution Fractions	Subranked Contribution Scores
query6876	802.47	1602.93	2	1602.93	-0.009241	M	VLGLGTGSTAAFVVAKL	G	294	82	98			125.72	1	0	Solyc01g097460.2.1	106.06	1	99.3468	cyr_090307_meja_05_2_bi3_p.02062.02062.2_49.447mins	1602.838196[0.087072];1602.920578[0.004690];1602.838196[0.087072];1602.838196[0.087072];1602.825333[0.099935];1602.872955[0.052313];1602.872955[0.052313];1602.898087[0.027181];1602.925278[-0.000010]	VLGLITIESKSLHN/Phospho (ST)[0000002000000000];VLGAVARDIIVNGIGH/;VLGLITIESKSLHN/Phospho (ST)[0000000002000000];VLGLITIESKSLHN/Phospho (ST)[0000000000020000];PDVASQPSPATLLNPP/;PKTITGSGDAPRXPPP/;PKTITGSGDAPRXPPP/;IVGLGYSNISIINQL/;LVRAFRQMGVVRR/Oxidation (M)[000000001000000]	19.660000;18.590000;17.660000;16.570000;15.540000;15.310000;15.310000;15.190000;14.560000	0.010814;0.013836;0.017140;0.022029;0.027925;0.029444;0.029444;0.030269;0.000000	1.070000;0.930000;1.090000;1.030000;0.230000;0.000000;0.120000;0.630000;NA	0.000000000025;0.000000000019;0.000000000016;0.000000000012;0.000000000010;0.000000000009;0.000000000009;0.000000000009;0.000000000008	0.000000;0.000000;0.000000;0.000000;0.000000;0.000000;0.000000;0.000000;0.000000
query8278	856.968	1711.92	2	1711.94	-0.014109	D	INSPISGEIVEVNTKL	S	162	99	114			131.56	1	0	Solyc08g007040.2.1	104.53	1	98.2699	cyr_090307_meja_05_2_bi4_p.01798.01798.2_42.788mins	1711.916779[0.004705];1711.899216[0.022268];1711.886154[0.035330];1711.890976[0.030508];1711.966095[-0.044611];1711.822220[0.099264];1711.827271[0.094213];1711.899185[0.022299];1711.846710[0.074774]	QVSNKVMKSRSIKK/Phospho (ST)[0000000002000000];QVSVVRELEIESLPD/;ARSKEMKRGGSMFLV/Oxidation (M)[00000000000010000];QVSVFKILLDRDLS/Phospho (ST)[0000000000000020];NLSLPLEGWFKLPKA/;GADAIINFIETPFPK/Phospho (ST)[00000000000200000];YSPAMALNMNEKSKI/Oxidation (M)[00000000010000000];SINPIEKELDELQGK/;KVKAMELIDQLEVT/Oxidation (M) Phospho (ST)[0000010000000020]	27.030000;26.750000;24.930000;24.440000;22.070000;20.760000;20.350000;19.950000;18.960000	0.001982;0.002113;0.003214;0.003597;0.006209;0.008395;0.009226;0.010116;0.000000	0.280000;1.820000;0.490000;2.370000;1.310000;0.410000;0.400000;0.990000;NA	0.000000000035;0.000000000033;0.000000000022;0.000000000019;0.000000000011;0.000000000008;0.000000000008;0.000000000007;0.000000000005	0.000000;0.000000;0.000000;0.000000;0.000000;0.000000;0.000000;0.000000;0.000000
query16738	1296.64	2591.26	2	2591.31	-0.050823	A	LEVLLGGDDGSLAFIPGNFSVSAGEK	I	171	72	97			120.16	1	0	Solyc04g082010.1.1	102.1	1	95.655	cyr_090307_meja_05_2_bi3_p.02153.02153.2_51.815mins	2591.272263[-0.011181];2591.338364[-0.077282];2591.322296[-0.061214];2591.322296[-0.061214];2591.286560[-0.025478];2591.301239[-0.040157];2591.301239[-0.040157];2591.301239[-0.040157];2591.301239[-0.040157]	SASQVMAVLQLPFAVASIILTEK/Oxidation (M) 2 Phospho (ST)[0202001000000000000000000];NLNNSVYTWLFKLSNLTHLDLS/;QVFGMSLVTLIFALVGFLSPSNR/Oxidation (M) Phospho (ST)[0000010000000000000002000];QVFGMSLVTLIFALVGFLSPSNR/Oxidation (M) Phospho (ST)[0000010000000000000200000];VATMSGLHLCRAGVSSRLFELHK/Phospho (ST)[0000000000000000200000000];QALKVSSSPPTLIATLKELLDHA/2 Phospho (ST)[0000000000020002000000000];QALKVSSSP…	18.060000;15.870000;14.280000;14.280000;14.180000;14.060000;13.940000;13.940000;13.940000	0.015631;0.025882;0.037325;0.037325;0.038194;0.039264;0.040365;0.040365;0.000000	2.190000;1.590000;0.000000;0.100000;0.120000;0.120000;0.000000;0.000000;NA	0.000000000062;0.000000000037;0.000000000026;0.000000000026;0.000000000025;0.000000000025;0.000000000024;0.000000000024;0.000000000024	0.000000;0.000000;0.000000;0.000000;0.000000;0.000000;0.000000;0.000000;0.000000
query6812	800.439	1598.86	2	1598.85	0.012334	D	INSPISGEIVEVNTK	L	162	99	113			106.71	1	0	Solyc08g007040.2.1	75.12	1	70.5099	cyr_090307_meja_05_2_bi4_p.01600.01600.2_37.628mins	1598.843277[0.020589];1598.837601[0.026265];1598.843277[0.020589];1598.885239[-0.021373];1598.780411[0.083455];1598.822556[0.041310];1598.895325[-0.031459];1598.829346[0.034520];1598.899124[-0.035258]	VQSPLSKKSFKISA/Phospho (ST)[0000000002000000];NISPLTGSNGEIRKN/;VQSPLSKKSFKISA/Phospho (ST)[0000000000000200];VQSPLSTQATAGKRR/;LNSSLSLSGTDLSLL/Phospho (ST)[00000000000002000];VVQKSSMLYSLDTL/Oxidation (M)[0000000100000000];QVSPLVTLGLLESLM/;RASSILQRFSKLN/Phospho (ST)[000020000000000];NLISPSKANITSLKN/	31.590000;27.780000;27.580000;27.580000;25.150000;23.060000;22.280000;21.600000;21.400000	0.000693;0.001667;0.001746;0.001746;0.003055;0.004943;0.005916;0.006918;0.000000	3.810000;0.200000;0.000000;2.430000;2.090000;0.780000;0.680000;0.200000;NA	0.000000030761;0.000000012794;0.000000012218;0.000000012218;0.000000006982;0.000000004315;0.000000003606;0.000000003083;0.000000002944	0.000000;0.000000;0.000000;0.000000;0.000000;0.000000;0.000000;0.000000;0.000000
query17240	887.462	2659.36	3	2659.28	0.087013	R	FNKVNYANVSTNNYALDEVEEVK	-	141	118	140			91.04	1	0	Solyc09g063130.2.1	74.01	1	66.689	cyr_090307_meja_05_2_bi3_p.01650.01650.3_38.703mins	2659.286911[0.076637];2659.286942[0.076606];2659.271667[0.091881];2659.271667[0.091881];2659.271667[0.091881];2659.355515[0.008033];2659.355515[0.008033];2659.317932[0.045616];2659.417877[-0.054329]	KSYKDIVGSAYYVAPEVLRRCY/Phospho (ST)[002000000000000000000000];KYNTNGNLLPPNFINVVGCLYGIG/Phospho (ST)[00002000000000000000000000];KVMGTNSELAYDSNPLIWVSRIS/Phospho (ST)[0000000000000000000000020];KVMGTNSELAYDSNPLIWVSRIS/Phospho (ST)[0000000000000000000020000];KVMGTNSELAYDSNPLIWVSRIS/Phospho (ST)[0000000000000200000000000];VSTKKLNVVGFRGRSSSSSNNTRV/Phospho (ST)[00020000000000000000000000];VSTKKLNVVGFRG…	17.030000;15.950000;15.510000;15.510000;15.510000;12.950000;12.950000;12.920000;12.250000	0.019815;0.025410;0.028119;0.028119;0.028119;0.050699;0.050699;0.051050;0.000000	1.080000;0.440000;0.000000;0.000000;2.560000;0.000000;0.030000;0.670000;NA	0.000000039719;0.000000030974;0.000000027990;0.000000027990;0.000000027990;0.000000015524;0.000000015524;0.000000015417;0.000000013213	0.000000;0.000000;0.000000;0.000000;0.000000;0.000000;0.000000;0.000000;0.000000
query5779	745.96	1489.9	2	1489.85	0.054189	M	VLGLGTGSTAAFVVAK	L	294	82	97			93.19	1	0	Solyc01g097460.2.1	73.45	1	69.293	cyr_090307_meja_05_2_bi3_p.01790.01790.2_42.356mins	1489.902100[0.002538];1489.840530[0.064108];1489.835159[0.069479];1489.871552[0.033086];1489.814026[0.090612];1489.872879[0.031759];1489.886795[0.017843];1489.813004[0.091634];1489.858948[0.045690]	VIGIGGFGKVFKGVL/;VPWSQSRPLKVPP/;VLGGLKKTESLSSAT/;LGVIKSSLGISKTST/;IVGLGYSNISIINQ/;IRLGGHAKLQVIAD/;LVGLKAYSATKQVI/;LVGATVGGLLARQR/Phospho (ST)[0000020000000000];LRGLNLEGLRRHG/	19.740000;14.200000;13.210000;13.120000;12.710000;12.450000;12.290000;11.870000;11.700000	0.010617;0.038019;0.047753;0.048753;0.053580;0.056885;0.059020;0.065013;0.000000	5.540000;0.990000;0.090000;0.410000;0.260000;0.160000;0.420000;0.170000;NA	0.000000045186;0.000000012618;0.000000010046;0.000000009840;0.000000008954;0.000000008433;0.000000008128;0.000000007379;0.000000007096	0.000000;0.000000;0.000000;0.000000;0.000000;0.000000;0.000000;0.000000;0.000000
query15759	824.449	2470.33	3	2470.31	0.011849	K	AVEYVKSGMVLGLGTGSTAAFVVAK	L	294	73	97	Oxidation (M)	[000000000100000000000000000]	79.66	1	0	Solyc01g097460.2.1	72.26	1	64.4987	cyr_090307_meja_05_2_bi3_p.01765.01765.3_41.708mins	2470.248383[0.077629];2470.248383[0.077629];2470.270981[0.055031];2470.283279[0.042733];2470.333450[-0.007438];2470.302505[0.023507];2470.240555[0.085457];2470.270981[0.055031];2470.294434[0.031578]	SIASAWLTLAVGLKAFSHCGFLV/Phospho (ST)[0000200000000000000000000];SIASAWLTLAVGLKAFSHCGFLV/Phospho (ST)[0200000000000000000000000];QVVLVSQSGTVNRIKVRDISI/2 Phospho (ST)[00000000200000000000200];STKGVITDVVVALDGTGNFTRIK/Phospho (ST)[0000000200000000000000000];LINVQIPFTPMVYPAGPVVFATP/;KLYVVTNYLTKPHYLTKPVN/Phospho (ST)[0000000000200000000000];VKSTCLMVSVLSFTLLHGPPFV/Oxidation (M) Phospho (ST)[000000010200…	7.400000;7.400000;6.760000;5.630000;5.100000;4.530000;4.290000;4.020000;3.320000	0.181970;0.181970;0.210863;0.273527;0.309030;0.352371;0.372392;0.396278;0.000000	0.000000;0.640000;1.130000;0.530000;0.570000;0.240000;0.270000;0.700000;NA	0.000000059429;0.000000059429;0.000000051286;0.000000039537;0.000000034995;0.000000030690;0.000000029040;0.000000027290;0.000000023227	0.000000;0.000000;0.000000;0.000000;0.000000;0.000000;0.000000;0.000000;0.000000
query13107	1079.01	2156	2	2156	-0.000345	F	NKVNYANVSTNNYALDEVE	E	141	119	137			86.34	1	0	Solyc09g063130.2.1	67.76	0.999999	59.6842	cyr_090307_meja_05_2_bi3_p.01559.01559.2_36.335mins	2155.928970[0.072836];2155.928970[0.072836];2156.074966[-0.073160];2156.030319[-0.028513];2156.058823[-0.057017];2156.058823[-0.057017];2156.058823[-0.057017];2155.940170[0.061636];2156.015732[-0.013926]	MIFMGFMVMVPSKMAVPE/2 Oxidation (M) Phospho (ST)[00000000010020100000];MIFMGFMVMVPSKMAVPE/2 Oxidation (M) Phospho (ST)[00000001000020100000];FPSPSSSSITLTNVLNADAVH/;LYVDLATHFRGEIVNSDK/Phospho (ST)[00000002000000000000];EATLTSRLSSKDLAFIPMP/Phospho (ST)[000000200000000000000];EATLTSRLSSKDLAFIPMP/Phospho (ST)[000002000000000000000];EATLTSRLSSKDLAFIPMP/Phospho (ST)[000200000000000000000];TTANCQEFLMDVNA…	18.580000;18.580000;17.750000;16.990000;16.380000;16.380000;16.380000;16.120000;15.790000	0.013868;0.013868;0.016788;0.019999;0.023014;0.023014;0.023014;0.024434;0.000000	0.000000;0.830000;0.760000;0.610000;0.000000;0.000000;0.260000;0.330000;NA	0.000000167494;0.000000167494;0.000000138356;0.000000116145;0.000000100925;0.000000100925;0.000000100925;0.000000095060;0.000000088105	0.000001;0.000001;0.000001;0.000001;0.000000;0.000000;0.000000;0.000000;0.000000
query7332	818.892	1635.77	2	1635.8	-0.028926	M	EGVESFDIDIKEQK	V	114	28	41			84.9	1	0	Solyc11g007200.1.1	64.67	0.999998	56.9723	cyr_090307_meja_05_2_bi3_p.01561.01561.2_36.377mins	1635.772202[-0.001964];1635.805511[-0.035273];1635.805511[-0.035273];1635.805511[-0.035273];1635.859634[-0.089396];1635.859634[-0.089396];1635.824310[-0.054072];1635.748856[0.021382];1635.848434[-0.078196]	WPFTLDEFVQAFH/;KFKKIMQKSTSNT/Oxidation (M) Phospho (ST)[000000100000020];KFKKIMQKSTSNT/Oxidation (M) Phospho (ST)[000000100002000];KFKKIMQKSTSNT/Oxidation (M) Phospho (ST)[000000100020000];KKEKTPKSKSPVEA/Phospho (ST)[0000000020000000];KKEKTPKSKSPVEA/Phospho (ST)[0000020000000000];TIAESFEIISLIADD/;AGQEYEDQAAQRAXV/;KSGIKSTDVILEIGP/Phospho (ST)[00000002000000000]	20.230000;19.090000;19.090000;19.090000;17.780000;17.780000;17.230000;17.060000;16.830000	0.009484;0.012331;0.012331;0.012331;0.016672;0.016672;0.018923;0.019679;0.000000	1.140000;0.000000;0.000000;1.310000;0.000000;0.550000;0.170000;0.230000;NA	0.000000341192;0.000000262421;0.000000262421;0.000000262421;0.000000194088;0.000000194088;0.000000171001;0.000000164437;0.000000155955	0.000001;0.000001;0.000001;0.000001;0.000001;0.000001;0.000001;0.000001;0.000001
query6336	779.894	1557.77	2	1557.79	-0.016932	L	IMVTSTSLMLFAGR	F	131	56	69	2 Oxidation (M)	[0010000001000000]	90.48	1	0	Solyc08g006930.2.1	63.27	0.999999	58.9029	cyr_090307_meja_05_2_bi3_p.01812.01812.2_42.927mins	1557.768341[0.004217];1557.791565[-0.019007];1557.807220[-0.034662];1557.774902[-0.002344];1557.786102[-0.013544];1557.818436[-0.045878];1557.780396[-0.007838];1557.780396[-0.007838];1557.807907[-0.035349]	FIVMNDEFLMRK/Oxidation (M)[00000000001000];LLYKKNSNGTVKN/Phospho (ST)[000000020000000];LMAELLVQIDGLNN/Oxidation (M)[0010000000000000];IFVTFAGMKVSDVE/Oxidation (M)[0000000010000000];MLSLSHHYTIVEL/Oxidation (M)[010000000000000];IMAEVLVANKNLNN/Oxidation (M)[0010000000000000];SLVVSFGASVATVGGK/Phospho (ST)[000002000000000000];SLVVSFGASVATVGGK/Phospho (ST)[020000000000000000];LFVTSPFGSFSEKI/	27.210000;23.610000;21.660000;20.800000;19.930000;19.490000;18.840000;18.840000;18.750000	0.001901;0.004355;0.006823;0.008318;0.010162;0.011246;0.013062;0.013062;0.000000	3.600000;1.950000;0.860000;0.870000;0.440000;0.650000;0.000000;0.090000;NA	0.000000470977;0.000000205589;0.000000131220;0.000000107646;0.000000088105;0.000000079616;0.000000068549;0.000000068549;0.000000067143	0.000002;0.000001;0.000001;0.000000;0.000000;0.000000;0.000000;0.000000;0.000000
query16023	1251.64	2501.27	2	2501.24	0.027623	F;F	ASGSDENDVVVIGGGPGGYVAAIKAAQ	L;L	501	31	57			83.05	0	0	Solyc05g053300.2.1;Solyc12g099100.1.1	61.46	0.999998	57.1043	cyr_090307_meja_05_2_bi3_p.01806.01806.2_42.779mins	2501.292023[-0.024593];2501.350479[-0.083049];2501.291397[-0.023967];2501.284424[-0.016994];2501.258972[0.008458];2501.333664[-0.066234];2501.267471[-0.000041];2501.267471[-0.000041];2501.212082[0.055348]	QLYALTVGRSARLVATALRPVS/2 Phospho (ST)[000000000000000020000020];KLNYLRFKGVPLVGFVMVEYGG/Oxidation (M)[000000000000000001000000];QLFESNRANKXLSEYTSVFLQ/;KMSLTLFMKYGLVMNVNPRDL/2 Oxidation (M)[00000000100000100000000];KLIKKTKEHSRVMKEQKSQ/Oxidation (M) 2 Phospho (ST)[000000200000010000200];SRDQLGETSVIKTLASEIQVAEK/;MTSIAMKVVLDVIREQFTLVP/2 Oxidation (M) Phospho (ST)[01020010000000000000000];MTSIAMKVVLDVI…	21.590000;17.020000;16.460000;16.160000;14.090000;13.920000;13.370000;13.370000;12.850000	0.006934;0.019861;0.022594;0.024210;0.038994;0.040551;0.046026;0.046026;0.000000	4.570000;0.560000;0.300000;2.070000;0.170000;0.550000;0.000000;0.520000;NA	0.000000714495;0.000000249459;0.000000219280;0.000000204644;0.000000127057;0.000000122180;0.000000107646;0.000000107646;0.000000095499	0.000003;0.000001;0.000001;0.000001;0.000001;0.000001;0.000000;0.000000;0.000000
query10442	952.045	1902.08	2	1902.08	-0.006602	M	VLGLGTGSTAAFVVAKLGEL	L	294	82	101			75.72	1	0	Solyc01g097460.2.1	59.18	0.999995	52.6808	cyr_090307_meja_05_2_bi3_p.02287.02287.2_55.319mins	1902.047882[0.028142];1902.028442[0.047582];1902.021042[0.054982];1901.986343[0.089681];1902.070328[0.005696];1901.987183[0.088841];1902.106720[-0.030696];1902.008804[0.067220];1902.017899[0.058125]	LAVIGVTELVVGLLLEGQ/Phospho (ST)[00000002000000000000];ALDKAVVAAAEIMTLKXG/Oxidation (M)[00000000000001000000];DPGAAGYTIKEAVALARSL/;IGGAELGAGVAPTAVGAILVS/Phospho (ST)[00000000000002000000000];IGIVGLGSIGLKVAQRLE/Phospho (ST)[00000000200000000000];KVISMLRMDKLPKTF/Oxidation (M) Phospho (ST)[00000000100000200];KVVLVLSGVAGLGSLARAL/Phospho (ST)[000000020000000000000];KKVGKVTSFTTGKRASQ/Phospho (ST)[000000…	16.540000;14.900000;14.350000;13.900000;13.010000;12.810000;11.520000;10.830000;9.130000	0.022182;0.032359;0.036728;0.040738;0.050003;0.052360;0.070469;0.082604;0.000000	1.640000;0.550000;0.450000;0.890000;0.200000;1.290000;0.690000;1.700000;NA	0.000001207807;0.000000827938;0.000000729454;0.000000657654;0.000000535794;0.000000511679;0.000000380187;0.000000324338;0.000000219279	0.000005;0.000004;0.000003;0.000003;0.000002;0.000002;0.000002;0.000001;0.000001
query6474	786.399	1570.78	2	1570.74	0.046849	F;F	NKVNYANVSTNNYA	L;L	139	118	131			72.2	0	0	Solyc06g083680.2.1;Solyc09g063130.2.1	59.03	0.999992	51.0495	cyr_090307_meja_05_2_bi4_p.01255.01255.2_28.614mins	1570.702820[0.081578];1570.714081[0.070317];1570.784744[-0.000346];1570.698608[0.085790];1570.786377[-0.001979];1570.786377[-0.001979];1570.701019[0.083379];1570.829651[-0.045253];1570.742615[0.041783]	QNVTLNNDLLNYA/Phospho (ST)[000020000000000];QTDPLNVNAGTPKH/Phospho (ST)[0000000000020000];QLRSMTAVAMVVFS/2 Oxidation (M)[0000010000100000];RLFYSGVLALWS/2 Phospho (ST)[00000200000020];KVIGMMKVATVEGI/Oxidation (M) Phospho (ST)[0000001000200000];KVIGMMKVATVEGI/Oxidation (M) Phospho (ST)[0000010000200000];TAFCKAHGGGRRCK/Phospho (ST)[0200000000000000];YAFVVQIVVYHHP/;VVMVTGASSGIGREI/Oxidation (M) Phosp…	13.170000;12.910000;12.070000;12.020000;11.250000;11.250000;10.630000;10.080000;9.820000	0.048195;0.051168;0.062087;0.062806;0.074989;0.074989;0.086497;0.098175;0.000000	0.260000;0.840000;0.050000;0.770000;0.000000;0.620000;0.550000;0.260000;NA	0.000001250249;0.000001177597;0.000000970502;0.000000959393;0.000000803520;0.000000803520;0.000000696621;0.000000613757;0.000000578092	0.000005;0.000005;0.000004;0.000004;0.000003;0.000003;0.000003;0.000003;0.000003
query3814	644.384	1286.75	2	1286.73	0.018849	L;L	LSIAVGLPNIGPH	F;F	839	540	552			83	0	0	Solyc03g121540.2.1;Solyc06g062580.2.1	57.22	0.999994	52.3457	cyr_090307_meja_05_2_bi3_p.01886.01886.2_44.850mins	1286.712875[0.040639];1286.687088[0.066426];1286.705658[0.047856];1286.682983[0.070531];1286.736298[0.017216];1286.759811[-0.006297];1286.674759[0.078755];1286.759811[-0.006297];1286.723419[0.030095]	RDLVGKGGKMLN/;DVVAVGIGGSFLGP/;CPLAVAKIVPYN/;LEKLGLESREN/;SIIPLLSIRVP/Phospho (ST)[0000000200000];SLLLPINQPPPV/;SKKVIIQPSAX/Phospho (ST)[0000000002000];TIVIPKVQIXY/;LXPITQNIYLN/	25.780000;22.290000;22.120000;20.300000;20.250000;18.420000;17.650000;17.620000;17.260000	0.002642;0.005902;0.006138;0.009333;0.009441;0.014388;0.017179;0.017298;0.000000	3.490000;0.170000;1.820000;0.050000;1.830000;0.770000;0.030000;0.360000;NA	0.000001896695;0.000000849176;0.000000816578;0.000000537029;0.000000530881;0.000000348335;0.000000291741;0.000000289733;0.000000266684	0.000008;0.000004;0.000004;0.000002;0.000002;0.000002;0.000001;0.000001;0.000001
query4818	692.858	1383.7	2	1383.7	-0.002757	K	KFVENAATSFSIA	-	259	246	258			78.22	1	0	Solyc07g044860.2.1	52.23	0.999971	45.357	cyr_090307_meja_05_2_bi4_p.01650.01650.2_38.924mins	1383.639511[0.061147];1383.728577[-0.027919];1383.645279[0.055379];1383.639511[0.061147];1383.639511[0.061147];1383.611862[0.088796];1383.628296[0.072362];1383.628296[0.072362];1383.652649[0.048009]	VEKSSSVRGASPT/Phospho (ST)[000020000000000];VELAFLSTSFSAL/;QDMQVAATRFTT/Oxidation (M)[00010000000000];VEKSSSVRGASPT/Phospho (ST)[000000200000000];VEKSSSVRGASPT/Phospho (ST)[000002000000000];RFSFRRMSTT/Oxidation (M) Phospho (ST)[000200010000];TTAGLTAPGNSITT/Phospho (ST)[0020000000000000];TTAGLTAPGNSITT/Phospho (ST)[0200000000000000];KFNILSGTSMACP/Oxidation (M)[000000000010000]	25.990000;24.660000;24.270000;23.680000;23.680000;21.390000;21.010000;21.010000;20.780000	0.002518;0.003420;0.003741;0.004285;0.004285;0.007261;0.007925;0.007925;0.000000	1.330000;0.390000;0.590000;0.000000;2.290000;0.380000;0.000000;0.230000;NA	0.000005983942;0.000004405420;0.000004027053;0.000003515502;0.000003515502;0.000002074853;0.000001901023;0.000001901023;0.000001802965	0.000026;0.000019;0.000017;0.000015;0.000015;0.000009;0.000008;0.000008;0.000008
query7494	825.918	1649.82	2	1649.81	0.006933	M	EGVETFDIDLKEQK	V	82	28	41			72.53	1	0	Solyc05g055310.2.1	51.21	0.999959	43.823	cyr_090306_meja_005_bi6_2_p.01559.01559.2_36.661mins	1649.723251[0.098501];1649.858612[-0.036860];1649.724899[0.096853];1649.724899[0.096853];1649.921265[-0.099513];1649.864075[-0.042323];1649.827698[-0.005946];1649.897751[-0.075999];1649.829437[-0.007685]	KGCRSIDIDDPHSK/Phospho (ST)[0000000000000200];CLSIVFDLDETLIVA/;SPMSVKTDIQRTK/2 Phospho (ST)[020000020000000];SPMSVKTDIQRTK/2 Phospho (ST)[020020000000000];KRKHVEEVLQEKQ/;ISLTSVPVIEXEGAK/Phospho (ST)[00000200000000000];ISLTSVPVIEXEGAK/Phospho (ST)[00000200000000000];REVLLSRKGKEKQ/Phospho (ST)[000000200000000];LDLSSMTNQTIKLGGG/Oxidation (M)[000000100000000000]	21.320000;20.010000;19.240000;19.240000;18.950000;18.390000;18.390000;18.260000;17.430000	0.007379;0.009977;0.011912;0.011912;0.012735;0.014488;0.014488;0.014928;0.000000	1.310000;0.770000;0.000000;0.290000;0.560000;0.000000;0.130000;0.830000;NA	0.000007568015;0.000005597344;0.000004687939;0.000004687939;0.000004385125;0.000003854624;0.000003854624;0.000003740951;0.000003090167	0.000033;0.000024;0.000020;0.000020;0.000019;0.000017;0.000017;0.000016;0.000013
query10727	644.011	1929.01	3	1928.96	0.050666	L	EGRSTPVKFSAHLKEDE	F	172	150	166			67.73	1	0	Solyc01g087520.2.1	50.91	0.999945	42.6286	cyr_090307_meja_05_2_bi4_p.01182.01182.3_26.690mins	1929.019653[-0.009804];1929.002960[0.006889];1928.911392[0.098457];1929.037613[-0.027764];1928.918976[0.090873];1928.928497[0.081352];1929.002975[0.006874];1928.913239[0.096610];1928.955124[0.054725]	KDKVKKSNKFSKNGKN/Phospho (ST)[000000000002000000];KMFLHALSELIQGASTPS/;KYGQSNHLMRRMVLT/Oxidation (M) Phospho (ST)[00000000010000020];GAQTKKIKIEYTLIFP/Phospho (ST)[000000000000200000];KLLQEDKMDVYGTTSW/Oxidation (M)[000000001000000000];LASFIENFGTHIITSVT/Phospho (ST)[0002000000000000000];IEGNTLVKMGTYRYIGV/Oxidation (M)[0000000001000000000];KATIGVEFQTQTLEIDG/Phospho (ST)[0000000000002000000];KAEEIKRIS…	16.820000;16.480000;15.940000;15.750000;15.720000;15.500000;14.410000;14.410000;14.200000	0.020797;0.022491;0.025468;0.026607;0.026792;0.028184;0.036224;0.036224;0.000000	0.340000;0.540000;0.190000;0.030000;0.220000;1.090000;0.000000;0.210000;NA	0.000008109168;0.000007498533;0.000006621804;0.000006338351;0.000006294718;0.000005983789;0.000004655607;0.000004655607;0.000004435844	0.000035;0.000033;0.000029;0.000028;0.000027;0.000026;0.000020;0.000020;0.000019
query3961	650.383	1298.75	2	1298.72	0.032873	L	LTVIGGASERVPT	L	287	273	285			86.53	1	0	Solyc06g063370.2.1	50.3	0.999985	48.2108	cyr_090307_meja_05_2_bi5_p.01493.01493.2_34.706mins	1298.780945[-0.028651];1298.663544[0.088750];1298.688705[0.063589];1298.759827[-0.007533];1298.755798[-0.003504];1298.738037[0.014257];1298.654037[0.098257];1298.652313[0.099981];1298.708221[0.044073]	LTVLNLSITLNV/;ITVLNFQKSGL/Phospho (ST)[0000000002000];LTVISVSLAVFA/Phospho (ST)[00000200000000];ITVGIGFKLSPAP/;TLVQVAIRGLTE/;ITVRAMVIINPG/Oxidation (M)[00000010000000];DTPINCQPVLIS/;VDVIKGEXLSI/Phospho (ST)[0000000000200];VDVIGVVQSVSPT/	36.230000;26.270000;26.190000;25.450000;25.080000;24.970000;24.630000;23.790000;23.750000	0.000238;0.002360;0.002404;0.002851;0.003105;0.003184;0.003443;0.004178;0.000000	9.960000;0.080000;0.740000;0.370000;0.110000;0.340000;0.840000;0.040000;NA	0.000009332402;0.000000941875;0.000000924684;0.000000779818;0.000000716133;0.000000698222;0.000000645644;0.000000532100;0.000000527222	0.000041;0.000004;0.000004;0.000003;0.000003;0.000003;0.000003;0.000002;0.000002
query14358	1152.56	2303.11	2	2303.07	0.042074	R	FNKVNYANVSTNNYALDEVE	E	141	118	137			64.74	1	0	Solyc09g063130.2.1	48.41	0.999927	41.3567	cyr_090307_meja_05_2_bi5_p.01616.01616.2_37.913mins	2303.105469[0.007177];2303.105469[0.007177];2303.111984[0.000662];2303.111984[0.000662];2303.053238[0.059408];2303.202393[-0.089747];2303.111984[0.000662];2303.111984[0.000662];2303.107635[0.005011]	IVNLHGLTKNLPSACTSVMEP/Phospho (ST)[00000000000002000000000];IVNLHGLTKNLPSACTSVMEP/Phospho (ST)[00000000200000000000000];SSPTALSLLLRSSMFQELVE/Oxidation (M) Phospho (ST)[0000000200000010000000];SSPTALSLLLRSSMFQELVE/Oxidation (M) Phospho (ST)[0000200000000010000000];KRSQKRANVNSNTLGGQSGAA/2 Phospho (ST)[00020000000000000020000];MPIAVYVLFYFINPKSTRE/Oxidation (M)[010000000000000000000];SSPTALSLLLRSSMFQ…	16.330000;16.330000;14.030000;14.030000;13.340000;11.900000;11.790000;11.790000;11.520000	0.023281;0.023281;0.039537;0.039537;0.046345;0.064565;0.066222;0.066222;0.000000	0.000000;2.300000;0.000000;0.690000;1.440000;0.110000;0.000000;0.270000;NA	0.000014420098;0.000014420098;0.000008491183;0.000008491183;0.000007243830;0.000005199579;0.000005069536;0.000005069536;0.000004763961	0.000063;0.000063;0.000037;0.000037;0.000031;0.000023;0.000022;0.000022;0.000021
query4993	467.987	1400.94	3	1400.89	0.053536	Q	KVQLILNHVIPK	F	248	103	114			70.46	1	0	Solyc07g053540.1.1	48.23	0.999949	42.8942	cyr_090307_meja_05_2_bi3_p.01546.01546.3_36.005mins	1400.853683[0.086587];1400.886719[0.053551];1400.850342[0.089928];1400.911865[0.028405];1400.875488[0.064782];1400.890076[0.050194];1400.853699[0.086571];1400.875504[0.064766];1400.886734[0.053536]	KNLIIIREKMK/Oxidation (M)[0000000000100];KSHLIKLLPQPX/;KSHLIKLLPQPX/;NKILLLLAKXTF/;NKILLLLAKXTF/;KDLLKKMRXLI/Oxidation (M)[0000000100000];KDLLKKMRXLI/Oxidation (M)[0000000100000];KDPPIPAVKVPLK/;KQILVNLHIVPK/	22.230000;19.260000;19.260000;17.500000;17.500000;15.350000;15.350000;14.820000;13.770000	0.005984;0.011858;0.011858;0.017783;0.017783;0.029174;0.029174;0.032961;0.000000	2.970000;0.000000;1.760000;0.000000;2.150000;0.000000;0.530000;1.050000;NA	0.000015030648;0.000007585386;0.000007585386;0.000005057987;0.000005057987;0.000003083030;0.000003083030;0.000002728838;0.000002142781	0.000065;0.000033;0.000033;0.000022;0.000022;0.000013;0.000013;0.000012;0.000009
query4085	656.345	1310.67	2	1310.67	0.003134	A;A	SSYADELVKTAK	T;T	396	46	57			69.39	0	0	Solyc02g062340.2.1;Solyc02g084440.2.1	48.08	0.999943	42.4626	cyr_090307_meja_05_2_bi3_p.01366.01366.2_31.291mins	1310.611877[0.063025];1310.586746[0.088156];1310.688690[-0.013788];1310.601990[0.072912];1310.671768[0.003134];1310.667755[0.007147];1310.644165[0.030737];1310.586746[0.088156];1310.613220[0.061682]	QSLDELINTAK/Phospho (ST)[0020000000000];AQLQSASVQTAQ/Phospho (ST)[00000002000000];SVAAPIFILLTS/Phospho (ST)[02000000000000];AVSAFEVARAPN/Phospho (ST)[00020000000000];SSYEIVSTNALK/;SSSSSLISRSLST/;LHVPVMGHSYGV/Oxidation (M)[00000010000000];AQLQSASVQTAQ/Phospho (ST)[00000200000000];SSINPPRFRAS/Phospho (ST)[0000000000020]	21.310000;20.430000;17.810000;17.530000;15.350000;15.010000;13.610000;13.320000;12.980000	0.007396;0.009057;0.016558;0.017660;0.029174;0.031550;0.043551;0.046559;0.000000	0.880000;2.620000;0.280000;2.180000;0.340000;1.400000;0.290000;0.340000;NA	0.000015558774;0.000012705020;0.000006949849;0.000006515914;0.000003944349;0.000003647333;0.000002642259;0.000002471584;0.000002285469	0.000068;0.000055;0.000030;0.000028;0.000017;0.000016;0.000011;0.000011;0.000010
query10702	964.983	1927.95	2	1927.89	0.059758	F;F	NKVNYANVSTNNYALDE	I;V	139	118	134			63.34	0	0	Solyc06g083680.2.1;Solyc09g063130.2.1	47.62	0.999944	42.5203	cyr_090307_meja_05_2_bi5_p.01452.01452.2_33.634mins	1927.919327[0.031575];1927.871033[0.079869];1927.928238[0.022664];1927.892853[0.058049];1927.918610[0.032292];1927.929214[0.021688];1927.929214[0.021688];1927.918610[0.032292];1927.919693[0.031209]	PPTGPGPAPSNVASRSFIP/Phospho (ST)[000200000000000000000];QTKATNRVVTMINEDE/Phospho (ST)[000002000000000000];DMLSRGQVEHVRSERN/Oxidation (M)[001000000000000000];VSFGSLAAAVSSGASGPPTSV/Phospho (ST)[00000000000000000002000];KLSKNLQSIMARNSEN/Oxidation (M) Phospho (ST)[000000002010000000];IDLSKNDFSGKIPSTLGG/Phospho (ST)[00000000000000020000];IDLSKNDFSGKIPSTLGG/Phospho (ST)[00000000000000200000];KLSKNLQSIM…	15.720000;11.860000;10.750000;10.720000;9.850000;9.440000;9.440000;9.360000;9.320000	0.026792;0.065163;0.084140;0.084723;0.103514;0.113763;0.113763;0.115878;0.000000	3.860000;1.110000;0.030000;0.870000;0.410000;0.000000;0.080000;0.040000;NA	0.000017297195;0.000007111737;0.000005507769;0.000005469853;0.000004476882;0.000004073575;0.000004073575;0.000003999224;0.000003962559	0.000075;0.000031;0.000024;0.000024;0.000019;0.000018;0.000018;0.000017;0.000017
query4790	692.374	1382.73	2	1382.79	-0.059535	F	LLYQEPVLGPVR	G	222	204	215			74.14	1	0	caseinbeta	46.91	0.999904	40.1768	cyr_090306_meja_005_bi9_2_p.01809.01809.2_39.624mins	1382.641769[0.090871];1382.648285[0.084355];1382.648285[0.084355];1382.648285[0.084355];1382.778244[-0.045604];1382.765671[-0.033031];1382.824509[-0.091869];1382.641754[0.090886];1382.641769[0.090871]	YKCGPPVRVSPT/Phospho (ST)[00000000000020];QSTSYPVLLAQP/Phospho (ST)[00002000000000];QSTSYPVLLAQP/Phospho (ST)[00020000000000];QSTSYPVLLAQP/Phospho (ST)[00200000000000];LLYKHGGPKRTN/;LIDALPNLEIVSS/;PTGLALAIEKKSR/;SWPGLKSQKCVA/Phospho (ST)[00000002000000];YKCGPPVRVSPT/Phospho (ST)[00000000002000]	27.230000;26.180000;26.180000;26.180000;24.040000;22.460000;20.250000;19.600000;19.580000	0.001892;0.002410;0.002410;0.002410;0.003945;0.005675;0.009441;0.010965;0.000000	1.050000;0.000000;0.000000;2.140000;1.580000;2.210000;0.650000;0.020000;NA	0.000020368465;0.000015994045;0.000015994045;0.000015994045;0.000009771434;0.000006791384;0.000004082802;0.000003515267;0.000003499116	0.000088;0.000069;0.000069;0.000069;0.000042;0.000029;0.000018;0.000015;0.000015
query6984	806.915	1611.82	2	1611.79	0.022588	Q;Q	APQEKGFAAFATDFL	M;M	387	77	91			64.73	0	0	Solyc11g062130.1.1;Solyc11g062190.1.1	44.72	0.99986	38.538	cyr_090307_meja_05_2_bi3_p.02154.02154.2_51.836mins	1611.732346[0.083546];1611.855835[-0.039943];1611.739182[0.076710];1611.800049[0.015843];1611.848328[-0.032436];1611.784393[0.031499];1611.887177[-0.071285];1611.740585[0.075307];1611.719421[0.096471]	RAAAFAKRSQSFI/2 Phospho (ST)[000000000202000];IISTALMTIGIAIVT/Oxidation (M) Phospho (ST)[00020001000000000];HPTVMFADNSSFLF/;KXQIGAVTAMETGLF/Oxidation (M)[00000000001000000];QVWKSVTFAALCFL/;IISATQHMLSRIF/Oxidation (M) Phospho (ST)[000200001000000];KKKXLSELGATDFL/;EARINEANVTRXY/Phospho (ST)[000000000020000];MAVEAVVEDGLTMMT/Oxidation (M)[00000000000000100]	20.010000;18.110000;17.920000;15.770000;15.620000;15.460000;15.460000;13.580000;13.410000	0.009977;0.015453;0.016144;0.026485;0.027416;0.028445;0.028445;0.043853;0.000000	1.900000;0.190000;2.150000;0.150000;0.160000;0.000000;1.880000;0.170000;NA	0.000033724008;0.000021774048;0.000020841990;0.000012703962;0.000012272674;0.000011828759;0.000011828759;0.000007672540;0.000007378009	0.000146;0.000095;0.000091;0.000055;0.000053;0.000051;0.000051;0.000033;0.000032
query3359	626.304	1250.59	2	1250.6	-0.009685	M	EGVESFDIDIK	E	114	28	38			72.3	1	0	Solyc11g007200.1.1	44.12	0.999872	38.9438	cyr_090307_meja_05_2_bi5_p.01707.01707.2_40.281mins	1250.581238[0.012120];1250.566650[0.026708];1250.614258[-0.020900];1250.615128[-0.021770];1250.570023[0.023335];1250.621658[-0.028300];1250.661865[-0.068507];1250.566681[0.026677];1250.658051[-0.064693]	EERSMELTQL/Oxidation (M)[000001000000];ELQDYDLDLQ/;ERESYEVVIQ/;ERFICDMPIK/;VEVSSMDLENL/Oxidation (M)[0000001000000];EKLMFDLQVE/;ERSFEGKASKL/;TDDFGLDLDAVA/;MVALSYLVDGLA/	28.180000;25.090000;24.890000;24.320000;23.660000;22.760000;18.110000;17.850000;17.790000	0.001521;0.003097;0.003243;0.003698;0.004305;0.005297;0.015453;0.016406;0.000000	3.090000;0.200000;0.570000;0.660000;0.900000;4.650000;0.260000;0.060000;NA	0.000038720826;0.000019008358;0.000018152841;0.000015920057;0.000013675544;0.000011115899;0.000003810172;0.000003588762;0.000003539522	0.000168;0.000083;0.000079;0.000069;0.000059;0.000048;0.000017;0.000016;0.000015
query5178	712.398	1422.78	2	1422.71	0.066167	L	AFIPGNFSVSAGEK	I	171	84	97			65.32	1	0	Solyc04g082010.1.1	44.01	0.999851	38.2753	cyr_090307_meja_05_2_bi3_p.01687.01687.2_39.669mins	1422.748337[0.032155];1422.752365[0.028127];1422.755722[0.024770];1422.826843[-0.046351];1422.775864[0.004628];1422.754074[0.026418];1422.771820[0.008672];1422.808228[-0.027736];1422.773453[0.007039]	SAVAQKVISQLVT/Phospho (ST)[020000000000000];KFQTLPSIPLXT/Phospho (ST)[00000002000000];KTXAALILMPIVT/Oxidation (M) Phospho (ST)[002000000100000];KTXAALILMPIVT/Oxidation (M)[000000000100000];LGFTKYLDGPLLS/;MSPSKVLKGVQYX/Oxidation (M)[010000000000000];IEAELGPEPRIVT/;AGVAPALSPLSAGLVT/;ELTLKIVSKIEA/Phospho (ST)[00020000000000]	21.310000;18.060000;17.360000;17.360000;16.630000;16.490000;16.240000;15.460000;14.850000	0.007396;0.015631;0.018365;0.018365;0.021727;0.022439;0.023768;0.028445;0.000000	3.250000;0.700000;0.000000;0.730000;0.140000;0.250000;0.780000;0.610000;NA	0.000039713247;0.000018790373;0.000015993201;0.000015993201;0.000013518714;0.000013089872;0.000012357636;0.000010326078;0.000008972953	0.000172;0.000082;0.000069;0.000069;0.000059;0.000057;0.000054;0.000045;0.000039
query13420	1093.59	2185.17	2	2185.16	0.011678	R	DMPIQAFLLYQEPVLGPVR	G	222	197	215			59.23	1	0	caseinbeta	42.69	0.99966	34.6852	cyr_090306_meja_005_bi9_2_p.02490.02490.2_55.032mins	2185.192902[-0.020686];2185.129639[0.042577];2185.129608[0.042608];2185.129608[0.042608];2185.272171[-0.099955];2185.107162[0.065054];2185.200775[-0.028559];2185.151154[0.021062];2185.125809[0.046407]	RKSGQVMGFTILLQKITYS/Oxidation (M)[000000010000000000000];RLTGAYRLFGSEVLGGLLPS/Phospho (ST)[0000000000000000000020];VKVRSSNLKYLLGENWIS/Phospho (ST)[00000020000000000000];VKVRSSNLKYLLGENWIS/Phospho (ST)[00000200000000000000];ETKLALLPYIGALTNVATKAV/;ELKNGYVSFLALVPELTVN/Phospho (ST)[000000000000000002000];LLGVDGTVHHKLLADHYGLK/;LMLGLQMLLIMSLRLVMV/2 Oxidation (M) Phospho (ST)[00000001000020000100];FGATL…	16.540000;16.540000;16.540000;16.540000;14.060000;13.150000;13.060000;13.060000;12.540000	0.022182;0.022182;0.022182;0.022182;0.039264;0.048417;0.049431;0.049431;0.000000	0.000000;0.000000;0.000000;2.480000;0.910000;0.090000;0.000000;0.520000;NA	0.000053808677;0.000053808677;0.000053808677;0.000053808677;0.000030398511;0.000024652009;0.000024146396;0.000024146396;0.000021421620	0.000234;0.000234;0.000234;0.000234;0.000132;0.000107;0.000105;0.000105;0.000093
query8259	856.516	1711.02	2	1711.02	-0.001536	Q	KVQLILNHVIPKFY	T	248	103	116			66.04	1	0	Solyc07g053540.1.1	42.59	0.999816	37.3456	cyr_090307_meja_05_2_bi4_p.01825.01825.2_43.478mins	1710.921738[0.095204];1711.003876[0.013066];1710.991974[0.024968];1710.982101[0.034841];1710.923920[0.093022];1710.926437[0.090505];1711.014450[0.002492];1711.014465[0.002477];1710.981430[0.035512]	KTFPLVLACLMAVII/Phospho (ST)[00200000000000000];QPEAKLRRRKMLLG/Oxidation (M)[0000000000010000];KKYNLSIVVLASIYT/;FRYSIVPFGGSKILK/;QPKAELRMPHPLPPT/;QPVTQLSATISAPRKD/;VKTKVSRFLIAAELH/;ANVRLTPPVLPPKPVN/;QVLKKAMAAALTSHKV/Oxidation (M)[000000010000000000]	23.450000;20.690000;19.270000;18.820000;18.100000;18.100000;16.160000;16.040000;14.860000	0.004519;0.008531;0.011830;0.013122;0.015488;0.015488;0.024210;0.024889;0.000000	2.760000;1.420000;0.450000;0.720000;0.000000;1.940000;0.120000;1.180000;NA	0.000055070620;0.000029168894;0.000021033908;0.000018963564;0.000016066451;0.000016066451;0.000010278269;0.000009998157;0.000007619386	0.000239;0.000127;0.000091;0.000082;0.000070;0.000070;0.000045;0.000043;0.000033
query8183	853.472	1704.93	2	1704.86	0.071142	L	IMVTSTSLMLFAGRF	G	131	56	70	2 Oxidation (M)	[00100000010000000]	66.89	1	0	Solyc08g006930.2.1	42.36	0.99984	37.9635	cyr_090307_meja_05_2_bi4_p.02014.02014.2_48.404mins	1704.941025[-0.011973];1704.865082[0.063970];1704.868256[0.060796];1704.912689[0.016363];1704.977417[-0.048365];1704.872299[0.056753];1704.840912[0.088140];1704.937836[-0.008784];1704.879486[0.049566]	PVYSTSLREIVTVKN/;KMQSPIDISSCRVKN/;SDGIVERYLDPTVKN/;IEQISKRCMRTVKN/;TGYILTIVDLRTVNK/;FILSSTSTFRFTGIE/;SSSTSATLLCLFLLLG/Phospho (ST)[000000020000000000];LNKGNMMKIKSTVKN/;DKVETRKLSTSQQW/	24.530000;21.390000;19.470000;18.710000;16.790000;16.570000;15.760000;15.370000;14.990000	0.003524;0.007261;0.011298;0.013459;0.020941;0.022029;0.026546;0.029040;0.000000	3.140000;1.920000;0.760000;1.920000;0.220000;0.810000;0.390000;0.380000;NA	0.000058067160;0.000028179325;0.000018110506;0.000015203045;0.000009770810;0.000009288179;0.000007707803;0.000007045804;0.000006455510	0.000252;0.000122;0.000079;0.000066;0.000042;0.000040;0.000033;0.000031;0.000028
query6590	789.869	1577.72	2	1577.72	-0.000849	A;A;A	KYGDKSVYFDLED	L;L;L	146	51	63			68.21	0	0	Solyc03g120640.2.1;Solyc06g066640.2.1;Solyc12g044280.1.1	40.8	0.999776	36.4968	cyr_090306_meja_005_bi6_2_p.01582.01582.2_37.276mins	1577.772568[-0.048472];1577.655548[0.068548];1577.746078[-0.021982];1577.823547[-0.099451];1577.712662[0.011434];1577.703171[0.020925];1577.775940[-0.051844];1577.699371[0.024725];1577.783798[-0.059702]	KNGKDIWVFDIDE/;EVFQGESCPPELED/;SLTSDLIAWTDIED/;KQLAKRFDTDLMP/Oxidation (M)[000000000000100];QDGYHNLLLSLEP/Phospho (ST)[000000000020000];QAQCNFVSLPDLED/;KGLSSMISGNPDIPF/Oxidation (M)[00000010000000000];DFIDMVTVTFMDL/2 Oxidation (M)[000001000001000];KERSTHVFXFIED/	27.410000;25.350000;22.460000;19.500000;19.160000;18.860000;17.680000;17.660000;16.880000	0.001816;0.002917;0.005675;0.011220;0.012134;0.013002;0.017061;0.017140;0.000000	2.060000;2.890000;2.960000;0.340000;0.300000;1.180000;0.020000;0.780000;NA	0.000083157743;0.000051749087;0.000026601290;0.000013455588;0.000012442358;0.000011611884;0.000008849173;0.000008808515;0.000007360422	0.000361;0.000225;0.000116;0.000058;0.000054;0.000050;0.000038;0.000038;0.000032
query7782	834.908	1667.8	2	1667.78	0.018697	L	VGDYGFDPFGLGKPAE	Y	286	67	82			61.53	1	0	Solyc09g014520.2.1	40.32	0.999698	35.2025	cyr_090307_meja_05_2_bi7_p.01931.01931.2_46.000mins	1667.718735[0.083119];1667.730469[0.071385];1667.730469[0.071385];1667.837952[-0.036098];1667.851852[-0.049998];1667.830780[-0.028926];1667.708649[0.093205];1667.847031[-0.045177];1667.807632[-0.005778]	VCLEKLMDSYSSTI/Phospho (ST)[0000000002000000];QGISDVAFSSDGRHL/Phospho (ST)[00000000020000000];QGISDVAFSSDGRHL/Phospho (ST)[00000000002000000];QGGSNGIGYGLKYQAR/;KGFRSIPEDESYLK/;FSTGGRVLDPFWSSL/;KCASESNRGLSGKHD/Phospho (ST)[00002000000000000];PTGRIVMGLFGKTVP/Oxidation (M) Phospho (ST)[00200001000000000];SPSNALTFLVMSESLG/Oxidation (M)[000000000001000000]	21.210000;19.170000;17.690000;14.900000;14.460000;14.140000;14.070000;13.960000;13.170000	0.007568;0.012106;0.017022;0.032359;0.035810;0.038548;0.039174;0.040179;0.000000	2.040000;1.480000;2.790000;0.440000;0.320000;0.070000;0.110000;0.790000;NA	0.000092868601;0.000058058913;0.000041292284;0.000021720454;0.000019627677;0.000018233452;0.000017941919;0.000017493185;0.000014583740	0.000403;0.000252;0.000179;0.000094;0.000085;0.000079;0.000078;0.000076;0.000063
query17144	1324.71	2647.41	2	2647.37	0.032124	T	APTKIGNGYSLIAIEESPDGGLIGYL	K	929	27	52			54.21	1	0	Solyc05g009470.2.1	37.72	0.999391	32.1514	cyr_090307_meja_05_2_bi3_p.02199.02199.2_53.014mins	2647.453979[-0.047389];2647.367966[0.038624];2647.317596[0.088994];2647.317596[0.088994];2647.411545[-0.004955];2647.401962[0.004628];2647.478439[-0.071849];2647.463821[-0.057231];2647.434662[-0.028072]	KVVLISSCIIETLDSATKKVLMDAA/;VARLALRFFDPLMPTDEPLTKSD/Oxidation (M)[0000000000000100000000000];VVQLIRGLASVPAANSAQSVVVFY/2 Phospho (ST)[00000000002000002000000000];VVQLIRGLASVPAANSAQSVVVFY/2 Phospho (ST)[00000000002000000002000000];SMRLLSNSQIPSVFTKDILNNRV/Oxidation (M)[0010000000000000000000000];PTQLVKKCLSALVTSASLIASHTSL/Phospho (ST)[000000000020000000000000000];IVKIDRAPPAPGAILPDRRMLFX/Oxidation (M)[…	16.490000;14.680000;13.730000;13.380000;11.160000;10.240000;7.950000;7.640000;7.590000	0.022439;0.034041;0.042364;0.045920;0.076560;0.094624;0.160325;0.172187;0.000000	1.810000;0.950000;0.350000;2.220000;0.920000;2.290000;0.310000;0.050000;NA	0.000168941088;0.000111361555;0.000089481918;0.000082553461;0.000049514829;0.000040062245;0.000023644780;0.000022015841;0.000021763828	0.000734;0.000484;0.000389;0.000359;0.000215;0.000174;0.000103;0.000096;0.000095
query7243	815.948	1629.88	2	1629.88	0.00057	S	MTNLNLPSIFVPLVG	L	73	37	51	Oxidation (M)	[01000000000000000]	58.97	1	0	Solyc01g007350.2.1	36.78	0.999482	32.8528	cyr_090307_meja_05_2_bi4_p.02394.02394.2_58.174mins	1629.807907[0.072683];1629.846130[0.034460];1629.945374[-0.064784];1629.850815[0.029775];1629.909653[-0.029063];1629.783737[0.096853];1629.891235[-0.010645];1629.849106[0.031484];1629.808594[0.071996]	REVVMMSRVKHEN/Oxidation (M)[000001000000000];LSALVEVTDLDQLNT/;LVLSAFLALRAAVETG/;NNRMDLLALLTSGVN/;KKARMKTRTEHKT/Oxidation (M)[000001000000000];ITQVMLEKGTNFIG/Phospho (ST)[0000000000200000];PIFNTLDKAMLPVR/Oxidation (M)[0000000000100000];KILHGPTTLKSASPT/Phospho (ST)[00000000200000000];TAHMAGGFNIFVHKT/	22.190000;17.610000;15.560000;15.270000;14.570000;14.430000;13.740000;12.920000;12.230000	0.006039;0.017338;0.027797;0.029717;0.034914;0.036058;0.042267;0.051050;0.000000	4.580000;2.050000;0.290000;0.700000;0.140000;0.690000;0.820000;0.690000;NA	0.000209785164;0.000073076001;0.000045580047;0.000042635835;0.000036288981;0.000035137817;0.000029976075;0.000024818457;0.000021172628	0.000911;0.000317;0.000198;0.000185;0.000158;0.000153;0.000130;0.000108;0.000092
query13461	730.747	2189.22	3	2189.19	0.029624	Q	KVQLILNHVIPKFYTFDD	L	248	103	120			50.98	1	0	Solyc07g053540.1.1	36.34	0.998373	27.8865	cyr_090307_meja_05_2_bi5_p.01905.01905.3_45.437mins	2189.223541[-0.005440];2189.190521[0.027580];2189.173782[0.044319];2189.127808[0.090293];2189.145691[0.072410];2189.145691[0.072410];2189.145691[0.072410];2189.126190[0.091911];2189.126190[0.091911]	LVLSXLVSSVFTLSSITLTY/;LVLSXLVSSVFTLSSITLTY/Oxidation (M)[0000010000000000000000];KIASREGLPIVRLSAIPXL/2 Phospho (ST)[000020000000002000000];QFIMYMAFLVRVHLSTHP/;KKHIASTVSIVDVKDVGISN/Phospho (ST)[0000000002000000000000];KKHIASTVSIVDVKDVGISN/Phospho (ST)[0000000200000000000000];KKHIASTVSIVDVKDVGISN/Phospho (ST)[0000002000000000000000];TITKEISVLVLKWSSGLR/2 Phospho (ST)[00020002000000000000];TITKEISVLV…	14.640000;14.640000;14.390000;14.390000;12.630000;12.630000;12.630000;12.560000;12.560000	0.034356;0.034356;0.036392;0.036392;0.054576;0.054576;0.054576;0.055463;0.000000	0.000000;0.250000;0.000000;1.760000;0.000000;0.000000;0.070000;0.000000;NA	0.000231895801;0.000231895801;0.000218923753;0.000218923753;0.000145979840;0.000145979840;0.000145979840;0.000143645784;0.000143645784	0.001007;0.001007;0.000951;0.000951;0.000634;0.000634;0.000634;0.000624;0.000624
query9553	913.023	1824.03	2	1824.05	-0.015407	M	VLNEANLTNAVLVRSVL	T	265	159	175			62.46	1	0	Solyc08g079110.2.1	36.27	0.999518	33.1699	cyr_090307_meja_05_2_bi3_p.01996.01996.2_47.727mins	1823.962891[0.068577];1824.021713[0.009755];1823.963745[0.067723];1823.952133[0.079335];1823.966919[0.064549];1823.946777[0.084691];1823.946777[0.084691];1824.083237[-0.051769];1824.060806[-0.029338]	KSVLVDDVKSLTSRXD/;GLERGQLSLANLLDIGR/;FMTMITLITSLVRANN/;PIFQGLMKSGIRVWI/Phospho (ST)[00000000020000000];ISLSGYFSGLNIVVGIDA/;ASMLLGLGGASILQTVTI/Phospho (ST)[00000000000000000200];ASMLLGLGGASILQTVTI/Phospho (ST)[00000000000000020000];LLDQKEAGKRLLLITN/;VITEDIKAGLVLVDIIN/	26.190000;21.130000;20.460000;18.010000;16.160000;13.770000;13.770000;13.150000;13.000000	0.002404;0.007709;0.008995;0.015812;0.024210;0.041976;0.041976;0.048417;0.000000	5.060000;0.670000;2.450000;1.850000;2.390000;0.000000;0.620000;0.150000;NA	0.000235934059;0.000073585228;0.000063065325;0.000035874895;0.000023430990;0.000013514209;0.000013514209;0.000011716304;0.000011318546	0.001025;0.000320;0.000274;0.000156;0.000102;0.000059;0.000059;0.000051;0.000049
query10052	934.017	1866.02	2	1866.05	-0.027643	E	LAAVKINAADIDIIANEL	E	111	66	83			67.04	1	0	Solyc12g099240.1.1	35.38	0.999577	33.7384	cyr_090307_meja_05_2_bi3_p.02117.02117.2_50.870mins	1866.093842[-0.075312];1865.949951[0.068579];1866.046204[-0.027674];1866.068634[-0.050104];1866.068695[-0.050165];1866.068649[-0.050119];1865.990356[0.028174];1865.990356[0.028174];1866.015671[0.002859]	GVVVLAGTNRLDILDKAL/;QSAIGAKTEVIDKQVTV/Phospho (ST)[0000000020000000000];LEVSVAPAAVSNGLLGLEK/;LAAAGEGVRELKLLANKX/;AVLQRSGRDVILINVDV/;RSIALIAERSPNLQVLS/;ATSLLTWLVLDIAVSGK/Phospho (ST)[0002000000000000000];ATSLLTWLVLDIAVSGK/Phospho (ST)[0020000000000000000];SRSPARGRGSPRRRSPS/	31.660000;25.230000;18.440000;16.910000;16.890000;16.660000;16.320000;16.320000;16.110000	0.000682;0.002999;0.014322;0.020370;0.020464;0.021577;0.023335;0.023335;0.000000	6.430000;6.790000;1.530000;0.020000;0.230000;0.340000;0.000000;0.210000;NA	0.000289611853;0.000065889518;0.000013798006;0.000009700996;0.000009656424;0.000009158331;0.000008468692;0.000008468692;0.000008068937	0.001258;0.000286;0.000060;0.000042;0.000042;0.000040;0.000037;0.000037;0.000035
query18818	983.803	2948.39	3	2948.4	-0.012246	A	AYGEAANVFGKPKENTDFLPYNGDGFK	L	259	73	99			43.6	1	0	Solyc07g044860.2.1	34.82	0.998571	28.4482	cyr_090307_meja_05_2_bi4_p.01699.01699.3_40.208mins	2948.480072[-0.094247];2948.380371[0.005454];2948.380432[0.005393];2948.377243[0.008582];2948.377243[0.008582];2948.448883[-0.063058];2948.364304[0.021521];2948.402054[-0.016229];2948.442474[-0.056649]	VDNAYPDGLLNGLEIMKISNVKGSLDAS/Oxidation (M)[000000000000000010000000000000];VDYLATISPFSWGMWSGRGGFSDIGGIG/Oxidation (M)[000000000000001000000000000000];TYSGLIHSCCLQCIIYSVILRKLY/2 Phospho (ST)[00000000200000000200000000];MERVGKLMENYLAEIASDRNLSVTN/Oxidation (M) Phospho (ST)[000000001000000000000020000];MERVGKLMENYLAEIASDRNLSVTN/Oxidation (M) Phospho (ST)[000000001000000002000000000];SQKSSHNQGQTEIHRQQ…	8.780000;6.840000;5.740000;5.160000;5.160000;4.720000;4.410000;3.440000;3.360000	0.132434;0.207014;0.266686;0.304789;0.304789;0.337287;0.362243;0.452898;0.000000	1.940000;1.100000;0.580000;0.000000;0.440000;0.310000;0.970000;0.080000;NA	0.000329138543;0.000210561392;0.000163447673;0.000143014062;0.000143014062;0.000129234582;0.000120331337;0.000096245125;0.000094488454	0.001430;0.000915;0.000710;0.000621;0.000621;0.000561;0.000523;0.000418;0.000410
query2480	582.318	1162.62	2	1162.62	0.001118	K	RLATSGANFAR	A	164	99	109			52.93	1	0	Solyc08g013670.2.1	34.41	0.99765	26.289	cyr_090307_meja_05_2_bi4_p.01120.01120.2_25.068mins	1162.576416[0.045384];1162.643143[-0.021343];1162.704681[-0.082881];1162.553589[0.068211];1162.573059[0.048741];1162.557800[0.064000];1162.551285[0.070515];1162.576431[0.045369];1162.565216[0.056584]	RIEEIMSNR/Oxidation (M)[00000010000];RLPQHRSNR/;RHVNGLKALR/;RLTVEYFR/Phospho (ST)[0002000000];ENPTHPIEAR/;EQASIQSSSAR/;DRSVQANMAR/Oxidation (M)[000000001000];KISIQSNCDR/;RSPTCESTALV/	18.520000;18.520000;18.370000;17.810000;17.620000;16.520000;15.620000;14.840000;13.330000	0.014060;0.014060;0.014555;0.016558;0.017298;0.022284;0.027416;0.032810;0.000000	0.000000;0.150000;0.560000;0.190000;1.100000;0.900000;0.780000;1.510000;NA	0.000361391665;0.000361391665;0.000349122735;0.000306886745;0.000293750173;0.000228022725;0.000185343829;0.000154873863;0.000109390128	0.001570;0.001570;0.001516;0.001333;0.001276;0.000990;0.000805;0.000673;0.000475
query5690	494.575	1480.7	3	1480.75	-0.041727	C	APHQGAGMVGKVTVN	-	171	156	170	Oxidation (M)	[00000000100000000]	50.76	1	0	Solyc04g082010.1.1	33.76	0.997662	26.3116	cyr_090307_meja_05_2_bi3_p.01081.01081.3_23.870mins	1480.684128[0.019812];1480.772415[-0.068475];1480.772415[-0.068475];1480.693619[0.010321];1480.685760[0.018180];1480.753815[-0.049875];1480.709244[-0.005304];1480.672867[0.031073];1480.678558[0.025382]	DCRGGAGYGISGVRGG/;KATAIVNSGLLLMA/Phospho (ST)[0000000020000000];KATALVNSGLLLMA/Phospho (ST)[0000000020000000];ITHQGRRVTYGN/Phospho (ST)[00200000000000];CPRQNSGVKVSQV/Phospho (ST)[000000200000000];DTKLIDVGVISKN/Phospho (ST)[002000000000000];FAGARGGSMXAEAVN/Oxidation (M)[00000000010000000];FAGARGGSMXAEAVN/Oxidation (M)[00000000010000000];TVGMNVFKTFKX/Oxidation (M) Phospho (ST)[00001000020000]	17.000000;16.020000;16.020000;15.090000;14.570000;13.700000;13.360000;13.360000;13.290000	0.019953;0.025003;0.025003;0.030974;0.034914;0.042658;0.046132;0.046132;0.000000	0.980000;0.000000;0.930000;0.520000;0.870000;0.340000;0.000000;0.070000;NA	0.000419742983;0.000334952671;0.000334952671;0.000270385529;0.000239874148;0.000196328543;0.000181544646;0.000181544646;0.000178641948	0.001823;0.001455;0.001455;0.001174;0.001042;0.000853;0.000789;0.000789;0.000776
query12989	714.726	2141.16	3	2141.11	0.051291	D	SHNDPLFHFGFGLTTKPVK	A	630	608	626			46.63	1	0	Solyc11g071640.1.1	32.09	0.998664	28.7429	cyr_090307_meja_05_2_bi3_p.01767.01767.3_41.750mins	2141.136826[0.020300];2141.149109[0.008017];2141.072052[0.085074];2141.065689[0.091437];2141.126266[0.030860];2141.148926[0.008200];2141.098907[0.058219];2141.060883[0.096243];2141.190094[-0.032968]	KIIVSFSSKGFDERETVSL/;KIPFIGFMLFCVLAMVIEA/;KLPRTLGLSMSLGPPKGTL/Oxidation (M) 2 Phospho (ST)[000000000212000000000];GSGEVSITVNAYPAKELILT/Phospho (ST)[0020000000000000000000];KDIPIPMSARKGGKVGSSSNP/Oxidation (M)[00000001000000000000000];LHPTVYVPVRLMMTERIS/;LKLPLTMSDRGLSKISCSL/Phospho (ST)[000000002000000000000];DCMVSLLKKAEVNQSSFRS/;KLDPLLTAYVHLLKELVP/Phospho (ST)[00000002000000000000]	14.540000;7.290000;6.940000;6.890000;6.560000;6.440000;4.950000;4.840000;4.500000	0.035156;0.186638;0.202302;0.204644;0.220800;0.226986;0.319890;0.328095;0.000000	7.250000;0.350000;0.050000;0.330000;0.120000;1.490000;0.110000;0.340000;NA	0.000617190910;0.000116257110;0.000107255488;0.000106027744;0.000098269675;0.000095591554;0.000067829641;0.000066133198;0.000061153247	0.002681;0.000505;0.000466;0.000460;0.000427;0.000415;0.000295;0.000287;0.000266
query6665	792.477	1582.94	2	1582.92	0.015417	K	VQLILNHVIPKFY	T	248	104	116			52.84	1	0	Solyc07g053540.1.1	31.87	0.996887	25.0677	cyr_090307_meja_05_2_bi3_p.01953.01953.2_46.591mins	1582.884750[0.054190];1583.009552[-0.070612];1582.861496[0.077444];1582.842712[0.096228];1582.904236[0.034704];1582.862000[0.076940];1583.017410[-0.078470];1582.884750[0.054190];1582.904251[0.034689]	DKYLGLKLVSRLV/Phospho (ST)[000000000020000];KVLIILLTLAVAIMG/Oxidation (M)[00000000000000100];NLILMGFKIGLMYA/;RATTHQAQLITSLSG/;QPLSKVITSRLIND/;KVLTIQPHIDPHW/;ARVVKLSYIPLVLL/;KVIDLNTHLKLPL/Phospho (ST)[000000020000000];KPGLSALVTGGASGIGKA/	20.970000;19.760000;18.920000;18.730000;17.640000;16.460000;16.400000;16.220000;16.070000	0.007998;0.010568;0.012823;0.013397;0.017219;0.022594;0.022909;0.023878;0.000000	1.210000;0.840000;0.190000;1.090000;1.180000;0.060000;0.180000;0.150000;NA	0.000648105590;0.000490507630;0.000404246034;0.000386941907;0.000301054946;0.000229427656;0.000226279790;0.000217092974;0.000209722858	0.002816;0.002131;0.001756;0.001681;0.001308;0.000997;0.000983;0.000943;0.000911
query3731	642.881	1283.75	2	1283.73	0.013403	M;M	ASLFLHVQKNK	I;I	73	60	70			56.85	0	0	Solyc01g007350.2.1;Solyc07g024040.1.1	31.72	0.998263	27.6011	cyr_090307_meja_05_2_bi4_p.01271.01271.2_29.038mins	1283.723770[0.024618];1283.687393[0.060995];1283.673462[0.074926];1283.658401[0.089987];1283.760162[-0.011774];1283.712524[0.035864];1283.756119[-0.007731];1283.687363[0.061025];1283.662231[0.086157]	QLFVKHIAEVT/;QIFKVHEGVVE/;RDFLHPRSLSG/;LFFTGCVKAGLE/;SAFILVHKVATV/;KFKLVXSITEG/;QRIAVGKIGTLE/;FLKEIHQEQI/;KQLFVHVNADN/	25.130000;22.790000;19.500000;18.330000;16.440000;16.130000;15.700000;13.750000;13.720000	0.003069;0.005260;0.011220;0.014689;0.022699;0.024378;0.026915;0.042170;0.000000	2.340000;3.290000;1.170000;1.890000;0.310000;0.430000;1.950000;0.030000;NA	0.000671807461;0.000391962774;0.000183757394;0.000140360473;0.000090833244;0.000084575548;0.000076602831;0.000048892790;0.000048556215	0.002919;0.001703;0.000798;0.000610;0.000395;0.000367;0.000333;0.000212;0.000211
query5055	705.903	1409.79	2	1409.79	-0.000606	E	FLSKVDYLLGKQ	A	259	152	163			54.1	1	0	Solyc07g044860.2.1	31.55	0.996751	24.8819	cyr_090307_meja_05_2_bi3_p.01658.01658.2_38.915mins	1409.766190[0.025044];1409.766190[0.025044];1409.799026[-0.007792];1409.787827[0.003407];1409.716660[0.074574];1409.750366[0.040868];1409.713989[0.077245];1409.751419[0.039815];1409.829865[-0.038631]	MAIVMKYIIALE/Oxidation (M)[01000000000000];MAIVMKYIIALE/Oxidation (M)[00000100000000];SATLPRLNILAQN/;QRLPQDDLLVLT/;KASEVLKDKALE/Phospho (ST)[00020000000000];KKRKQSVSXNQ/Phospho (ST)[0000002000000];KKRKQSVSXNQ/Phospho (ST)[0000002000000];QLRIPLDAAGDEL/;LFIALKSVILIT/Phospho (ST)[00000002000000]	22.550000;20.460000;20.300000;20.240000;18.420000;18.280000;18.280000;18.280000;17.970000	0.005559;0.008995;0.009333;0.009462;0.014388;0.014859;0.014859;0.014859;0.000000	2.090000;0.160000;0.060000;1.820000;0.140000;0.000000;0.000000;0.310000;NA	0.000697567920;0.000431108415;0.000415514802;0.000409813726;0.000269517208;0.000260967545;0.000260967545;0.000260967545;0.000242988936	0.003031;0.001873;0.001805;0.001780;0.001171;0.001134;0.001134;0.001134;0.001055
query3534	633.335	1264.66	2	1264.62	0.037648	M	EGVETFDIDLK	E	82	28	38			60.28	1	0	Solyc05g055310.2.1	31.4	0.997741	26.46	cyr_090307_meja_05_2_bi8_p.01831.01831.2_40.932mins	1264.624069[0.032277];1264.589508[0.066838];1264.652573[0.003773];1264.608124[0.048222];1264.563507[0.092839];1264.574066[0.082280];1264.666306[-0.009960];1264.667938[-0.011592];1264.582993[0.073353]	NNWTFFPVLQ/;SNAAATSSTTNQL/;CIFWLDIDIK/;REETQMQLSK/Oxidation (M)[000000100000];MANTGKHVSIQ/Phospho (ST)[0000000002000];KTSSXFLDLQ/Phospho (ST)[000020000000];SKAKTFDIQDL/;TLAETLSPIKI/Phospho (ST)[0000000200000];SMRQGSGAQLSQ/Oxidation (M)[00100000000000]	28.880000;27.310000;24.260000;24.020000;22.060000;21.560000;20.330000;19.400000;19.370000	0.001294;0.001858;0.003750;0.003963;0.006223;0.006982;0.009268;0.011482;0.000000	1.570000;3.050000;0.240000;1.960000;0.500000;1.230000;0.930000;0.030000;NA	0.000722799129;0.000503521037;0.000249469594;0.000236057400;0.000150320295;0.000133973104;0.000100929383;0.000081473734;0.000080912873	0.003140;0.002187;0.001084;0.001025;0.000653;0.000582;0.000438;0.000354;0.000351
query6227	770.961	1539.91	2	1539.89	0.020879	K;K	ENLELIVGLVKEGK	L;L	275	227	240			69.64	0	0	Solyc09g059020.2.1;Solyc09g059030.2.1	31	0.998577	28.4667	cyr_090307_meja_05_2_bi5_p.01856.01856.2_44.166mins	1539.825653[0.082403];1539.898422[0.009634];1539.817413[0.090643];1539.858200[0.049856];1539.946030[-0.037974];1539.895920[0.012136];1539.873230[0.034826];1539.852127[0.055929];1539.840912[0.067144]	EGVAEIVLDRVINN/;GALEDLLRVIVTNK/;TRFNIVLGTAKGLA/Phospho (ST)[0200000000000000];DLQELLPSAIIMVV/;KQSAALIGGRSKIVL/;LRSFVLLMLXIAQ/;EARNKLQLEIKAQ/;SRLEIIRXEAHVF/;QFQKIPSLLDSHK/	38.640000;35.850000;27.860000;24.580000;24.160000;23.470000;23.290000;22.810000;22.500000	0.000137;0.000260;0.001637;0.003483;0.003837;0.004498;0.004688;0.005236;0.000000	2.790000;7.990000;3.280000;0.420000;0.690000;0.180000;0.480000;0.310000;NA	0.000793197585;0.000417235625;0.000066279830;0.000031144501;0.000028273618;0.000024120227;0.000023140961;0.000020719601;0.000019292183	0.003446;0.001812;0.000288;0.000135;0.000123;0.000105;0.000101;0.000090;0.000084
query5640	737.894	1473.77	2	1473.79	-0.017085	S	MTNLNLPSIFVPL	V	73	37	49	Oxidation (M)	[010000000000000]	51.89	1	0	Solyc01g007350.2.1	30.89	0.994442	22.551	cyr_090307_meja_05_2_bi3_p.02372.02372.2_57.539mins	1473.820450[-0.047404];1473.676102[0.096944];1473.768829[0.004217];1473.702103[0.070943];1473.746368[0.026678];1473.706802[0.066244];1473.706802[0.066244];1473.719009[0.054037];1473.709961[0.063085]	NWSGVRYRKVLP/;GLCGINKMVSFPL/Oxidation (M) Phospho (ST)[000000001020000];QLGARITFGGQVNN/;MPTVDEVAASSAPIS/;LDVSVKFSDTHLN/;EVVMMSRVKHEN/Oxidation (M)[00000100000000];EVVMMSRVKHEN/Oxidation (M)[00001000000000];LDVTLLVTXIYN/Phospho (ST)[00000000200000];LDVTNQPNAFLEN/	21.000000;20.590000;20.210000;19.460000;19.380000;19.370000;19.370000;19.300000;19.300000	0.007943;0.008730;0.009528;0.011324;0.011535;0.011561;0.011561;0.011749;0.000000	0.410000;0.380000;0.750000;0.080000;0.010000;0.000000;0.070000;0.000000;NA	0.000810176310;0.000737190177;0.000675428746;0.000568302465;0.000557929776;0.000556646573;0.000556646573;0.000547746410;0.000547746410	0.003520;0.003203;0.002934;0.002469;0.002424;0.002418;0.002418;0.002379;0.002379
query5281	717.916	1433.82	2	1433.8	0.014761	L;L	LSIAVGLPNIGPHF	E;E	839	540	553			55.29	0	0	Solyc03g121540.2.1;Solyc06g062580.2.1	30.47	0.997556	26.1198	cyr_090307_meja_05_2_bi3_p.02079.02079.2_49.883mins	1433.748260[0.069586];1433.776596[0.041250];1433.857895[-0.040049];1433.795212[0.022634];1433.779968[0.037878];1433.811905[0.005941];1433.752747[0.065099];1433.753067[0.064779];1433.751434[0.066412]	IISAVGCCALRKSN/;SLLGLGLFLSNVDS/;DRLRIGGIPGPRK/;LISGIGLGAVKFEM/;LVMVKIEVSVTSN/Oxidation (M)[000100000000000];KKGARLGKISLSP/Phospho (ST)[000000000000200];GKKRKFHAEGYN/;ELAGLAVGATILLN/Phospho (ST)[0000000000200000];DFGSAKVLVKGEAN/	24.820000;21.640000;20.050000;17.380000;16.990000;16.730000;16.620000;16.180000;15.850000	0.003296;0.006855;0.009886;0.018281;0.019999;0.021232;0.021777;0.024099;0.000000	3.180000;1.590000;2.670000;0.390000;0.260000;0.110000;0.440000;0.330000;NA	0.000895235872;0.000430464634;0.000298495285;0.000161412616;0.000147549410;0.000138975254;0.000135499432;0.000122443991;0.000113484742	0.003890;0.001870;0.001297;0.000701;0.000641;0.000604;0.000589;0.000532;0.000493
query9142	892.982	1783.95	2	1783.97	-0.017527	K	RTEEQALSLNIPLSTL	D	294	118	133			51.57	1	0	Solyc01g097460.2.1	30.24	0.995404	23.3767	cyr_090307_meja_05_2_bi4_p.02001.02001.2_48.065mins	1783.938980[0.011434];1783.959717[-0.009303];1783.959717[-0.009303];1783.965469[-0.015055];1783.896835[0.053579];1783.972000[-0.021586];1783.860260[0.090154];1783.886948[0.063466];1783.932434[0.017980]	MKEVVEVNXNILPSVD/;TYRIVRVSSLPLSTI/Phospho (ST)[00000000020000000];TYRIVRVSSLPLSTI/Phospho (ST)[00000000200000000];TTAGKAIVKSKGCFIFN/;VAGLSSLSISLSLGSNSL/Phospho (ST)[00000000000000000200];IPTISKDGGSWLLSPTI/;XGGFGGGLGGGGGGVGGGLGGLGGG/;SAFKNLGKSIAVGEAGVG/Phospho (ST)[02000000000000000000];MREILNMPLVQDLVN/	21.330000;20.230000;20.230000;18.690000;17.680000;16.910000;16.810000;16.530000;16.170000	0.007362;0.009484;0.009484;0.013521;0.017061;0.020370;0.020845;0.022233;0.000000	1.100000;0.000000;1.540000;1.010000;0.770000;0.100000;0.280000;0.360000;NA	0.000941888726;0.000731138407;0.000731138407;0.000512860910;0.000406442953;0.000340407875;0.000332659246;0.000311888670;0.000287077793	0.004092;0.003176;0.003176;0.002228;0.001766;0.001479;0.001445;0.001355;0.001247
query11136	984.46	1966.91	2	1966.93	-0.021144	G	GDDGSLAFIPGNFSVSAGEK	I	171	78	97			54.07	1	0	Solyc04g082010.1.1	29.82	0.997206	25.5376	cyr_090307_meja_05_2_bi4_p.01873.01873.2_44.732mins	1966.961090[-0.054988];1967.002487[-0.096385];1966.933578[-0.027476];1966.948822[-0.042720];1966.945877[-0.039775];1966.963409[-0.057307];1966.989639[-0.083537];1966.924667[-0.018565];1966.923981[-0.017879]	EFLEPFLPRQLNACAGY/;CCPKIAFISLLKLVPEN/Phospho (ST)[0000000002000000000];IQLSGRGHYLMSPQSIT/Phospho (ST)[0000200000000000000];KRRKQSMPIFGTYEF/Phospho (ST)[00000020000000000];GDRLCALFTDTANVPDFL/;KETWAFITWIVFAIY/Phospho (ST)[00000000200000000];IGQVFSMLPGFSAELMPK/Oxidation (M)[00000000000000001000];SVWVSGFLYALVPIVSA/2 Phospho (ST)[0200000000000000200];KMEVGAELSVKKTFLQ/2 Phospho (ST)[000000000200020000]	24.250000;19.680000;19.640000;16.660000;16.650000;16.610000;16.460000;16.140000;16.070000	0.003758;0.010765;0.010864;0.021577;0.021627;0.021827;0.022594;0.024322;0.000000	4.570000;0.040000;2.980000;0.010000;0.040000;0.150000;0.320000;0.070000;NA	0.001039405116;0.000362898230;0.000359571159;0.000181044297;0.000180627907;0.000178971901;0.000172895962;0.000160614537;0.000158046488	0.004516;0.001576;0.001562;0.000786;0.000785;0.000777;0.000751;0.000698;0.000686
query5311	719.445	1436.87	2	1436.84	0.035863	F	LEIAGLISPHFLK	-	147	134	146			78.24	1	0	Solyc01g107330.2.1	29.64	0.998599	28.5347	cyr_090307_meja_05_2_bi3_p.01956.01956.2_46.676mins	1436.857544[0.017430];1436.775177[0.099797];1436.885376[-0.010402];1436.787476[0.087498];1436.871445[0.003529];1436.932983[-0.058009];1436.782578[0.092396];1436.804367[0.070607];1436.792160[0.082814]	KINQIISPRXVN/;KNLSRELIGSKI/Phospho (ST)[00000000002000];IELKIILIDLPSA/;ELLEALTAIGATHV/;EIIERSLPKKPK/;ELQILIILKLNK/;GANKILLLLAKXT/Phospho (ST)[000000000000020];FELLPKLLKLSG/Phospho (ST)[00000000000200];NKLQLIIRAHEC/	48.600000;40.680000;36.160000;32.490000;31.140000;30.010000;28.060000;24.660000;24.660000	0.000014;0.000086;0.000242;0.000564;0.000769;0.000998;0.001563;0.003420;0.000000	7.920000;4.520000;3.670000;1.350000;1.130000;1.950000;3.400000;0.000000;NA	0.001084903223;0.000175142280;0.000061857306;0.000026569966;0.000019471123;0.000015010356;0.000009580562;0.000004379162;0.000004379162	0.004714;0.000761;0.000269;0.000115;0.000085;0.000065;0.000042;0.000019;0.000019
query3794	643.858	1285.7	2	1285.66	0.04549	D	PVGNWIGQRPY	-	160	149	159			53.37	1	0	Solyc00g174340.1.1	29.39	0.994686	22.7458	cyr_090307_meja_05_2_bi10_p.01776.01776.2_36.844mins	1285.696487[0.005757];1285.643143[0.059101];1285.633636[0.068608];1285.678558[0.023686];1285.725494[-0.023250];1285.658768[0.043476];1285.633636[0.068608];1285.681229[0.021015];1285.728851[-0.026607]	PRNWLMVKNI/Oxidation (M)[000000100000];PKKVSLVSHDP/Phospho (ST)[0000020000000];PVGVNSTSANMPL/;PVGGGSRKNRRC/;PVGNVHALPLXN/;PVNENLMELLV/Oxidation (M)[0000000100000];PVGNSLPLSQGSM/;PRRGSIEMLEV/;PRRGSIVMLNK/Oxidation (M)[0000000010000]	23.980000;23.380000;21.860000;20.240000;20.100000;19.860000;19.680000;19.320000;17.500000	0.003999;0.004592;0.006516;0.009462;0.009772;0.010328;0.010765;0.011695;0.000000	0.600000;1.520000;1.620000;0.140000;0.240000;0.180000;0.360000;1.820000;NA	0.001144685026;0.000996978979;0.000702564177;0.000483822434;0.000468474549;0.000443288027;0.000425290813;0.000391458747;0.000257445913	0.004974;0.004332;0.003052;0.002102;0.002035;0.001926;0.001847;0.001700;0.001118
query5047	704.926	1407.84	2	1407.84	-0.007686	E;E;E;E;E;E;E;E;E;E;E	IQTAVRLVLPGEL	A;A;A;A;A;A;A;A;A;A;A	135	104	116			46.42	0	0	Solyc02g038690.1.1;Solyc03g071620.1.1;Solyc05g055440.1.1;Solyc06g005390.1.1;Solyc06g074780.1.1;Solyc06g074790.1.1;Solyc06g075800.1.1;Solyc11g007920.1.1;Solyc11g007930.1.1;Solyc11g066430.1.1;Solyc12g013510.1.1	29.31	0.993223	21.6894	cyr_090307_meja_05_2_bi5_p.01936.01936.2_46.233mins	1407.870087[-0.032833];1407.781219[0.056035];1407.759888[0.077366];1407.759888[0.077366];1407.842422[-0.005168];1407.833694[0.003560];1407.906464[-0.069210];1407.863556[-0.026302];1407.892517[-0.055263]	STLLLVIIPQAVAA/;TGCTILVLLLVAL/Phospho (ST)[020000000000000];AVARRDLVLKTS/Phospho (ST)[00000000000020];AVARRDLVLKTS/Phospho (ST)[00000000000200];KLVHKFKMLPAP/;ELLSIAVGLPNIGL/;KILTGLAIALIXVP/;STLLLLVRLMHL/;IRLEKIKLPGKN/	17.110000;16.130000;15.920000;15.920000;14.410000;14.220000;14.150000;13.980000;13.730000	0.019454;0.024378;0.025586;0.025586;0.036224;0.037844;0.038459;0.039994;0.000000	0.980000;0.210000;0.000000;1.510000;0.190000;0.070000;0.170000;0.250000;NA	0.001164251066;0.000929066165;0.000885210678;0.000885210678;0.000625239841;0.000598475869;0.000588906902;0.000566300108;0.000534621776	0.005059;0.004037;0.003846;0.003846;0.002716;0.002600;0.002558;0.002460;0.002322
query8795	876.015	1750.01	2	1750	0.011586	D	PPLAVFQLDKVLVPSQ	F	248	170	185			66.99	1	0	Solyc07g053540.1.1	28.55	0.998417	28.0051	cyr_090307_meja_05_2_bi3_p.02145.02145.2_51.602mins	1749.944717[0.069783];1750.000504[0.013996];1749.921219[0.093281];1750.024033[-0.009533];1749.984940[0.029560];1750.024002[-0.009502];1749.925049[0.089451];1750.032562[-0.018062];1749.998901[0.015599]	IARIKSTDIKMFPSQ/Oxidation (M)[00000000000100000];KTTPKSLQTIKLLSI/Phospho (ST)[00000020000000000];SSLMPRTKGGLLVPSK/Phospho (ST)[000000020000000000];IVLLVSDKIEGPGVSPK/;SSRVNLISHLREVLQ/;TKLSSIVSFLKESIAK/;RKRKVSEDKVQLGQ/Phospho (ST)[0000002000000000];ERRNLRVKGVLVTNP/;REEGVVPDKVVLVNVV/	38.440000;25.020000;21.900000;20.720000;18.830000;18.750000;18.370000;18.300000;18.300000	0.000143;0.003148;0.006457;0.008472;0.013092;0.013335;0.014555;0.014791;0.000000	13.420000;3.120000;1.180000;1.890000;0.080000;0.380000;0.070000;0.000000;NA	0.001394157875;0.000063432519;0.000030925160;0.000023567415;0.000015251479;0.000014973108;0.000013718668;0.000013499322;0.000013499322	0.006059;0.000275;0.000134;0.000102;0.000066;0.000065;0.000060;0.000059;0.000059
query16163	1259.1	2516.18	2	2516.19	-0.015529	E	FYVITWESPKEQIFEMPTGGAA	I	209	97	118	Oxidation (M)	[000000000000000010000000]	39.52	1	0	Solyc06g054260.1.1	28.48	0.995013	23.0215	cyr_090307_meja_05_2_bi4_p.01951.01951.2_46.768mins	2516.174088[0.003742];2516.142990[0.034840];2516.080978[0.096852];2516.087296[0.090534];2516.209442[-0.031612];2516.094711[0.083119];2516.087296[0.090534];2516.097229[0.080601];2516.087296[0.090534]	VFLLDGVQSMAGAGESGVISYENAS/Oxidation (M)[000000000010000000000000000];FTTLLPYQFQHLSSFNLIST/2 Phospho (ST)[0000000000000000000220];TPSKAMLPLQAPSPFMPFTYT/2 Oxidation (M) 2 Phospho (ST)[02020010000000001000000];TYQVLRSDEVEFEVISAERS/2 Phospho (ST)[0000000200000000000020];IGGMVLDVNAISSIHANPRTTTPG/Oxidation (M) Phospho (ST)[00001000000000000000002000];QDNDFLPLVATPMLDQPSLLN/Oxidation (M) 2 Phospho (ST)[0…	11.040000;7.300000;6.960000;6.770000;5.830000;5.550000;5.120000;5.080000;5.040000	0.078705;0.186209;0.201372;0.210378;0.261216;0.278612;0.307610;0.310456;0.000000	3.740000;0.340000;0.190000;0.940000;0.280000;0.430000;0.040000;0.040000;NA	0.001411980581;0.000596799875;0.000551859755;0.000528236886;0.000425430600;0.000398867567;0.000361267359;0.000357955240;0.000354673486	0.006136;0.002593;0.002397;0.002295;0.001848;0.001733;0.001569;0.001555;0.001541
query6307	776.886	1551.76	2	1551.74	0.019216	A	RTSAFTFGLVYGSM	K	54	19	32	Oxidation (M)	[0000000000000010]	46.03	1	0	Solyc01g110540.2.1	28.22	0.992002	20.97	cyr_090307_meja_05_2_bi5_p.01885.01885.2_44.916mins	1551.758575[-0.000177];1551.850815[-0.092417];1551.697006[0.061392];1551.763931[-0.005533];1551.660660[0.097738];1551.777206[-0.018808];1551.772171[-0.013773];1551.664017[0.094381];1551.760925[-0.002527]	YVKTLEKVTTGSF/Phospho (ST)[000020000000000];KTPQDIKAVVVPEE/;TKYVRIEAYNDT/Phospho (ST)[02000000000000];KTYVFRHLYVF/Phospho (ST)[0020000000000];DHGFQPISVVSASE/Phospho (ST)[0000000000020000];DKMVLSPLVPVQF/Phospho (ST)[000000200000000];TNAWVLPEGKYGAF/;DGHTLQCLLVSASE/Phospho (ST)[0000000000020000];PKTKSYYLFDGYA/	17.810000;16.860000;16.610000;16.220000;14.470000;14.000000;14.000000;13.880000;13.790000	0.016558;0.020606;0.021827;0.023878;0.035727;0.039811;0.039811;0.040926;0.000000	0.950000;0.250000;0.390000;1.750000;0.470000;0.000000;0.120000;0.090000;NA	0.001494556701;0.001200915350;0.001133737198;0.001036364185;0.000692647699;0.000621601990;0.000621601990;0.000604661610;0.000592259991	0.006496;0.005219;0.004927;0.004503;0.003009;0.002700;0.002700;0.002627;0.002573
query6409	784.399	1566.78	2	1566.78	0.006703	D	LLNAAGETYSVTLSE	K	171	133	147			48.05	1	0	Solyc04g082010.1.1	28.2	0.992348	21.1622	cyr_090307_meja_05_2_bi3_p.01728.01728.2_40.742mins	1566.721848[0.062550];1566.740494[0.043904];1566.726898[0.057500];1566.721848[0.062550];1566.787888[-0.003490];1566.696686[0.087712];1566.809189[-0.024791];1566.758209[0.026189];1566.758209[0.026189]	YTTTFVLNSLISX/Phospho (ST)[000000000200000];FSIPVESVVVMPPA/Oxidation (M) Phospho (ST)[0000000200010000];SLMEANSNLMLLSE/Oxidation (M)[0001000000000000];YTTTFVLNSLISX/Phospho (ST)[000020000000000];DRSGIRISRVLSE/Phospho (ST)[000000002000000];FSNPKSGPEPVLSE/Phospho (ST)[0000002000000000];MSLAAISPLTKINL/Oxidation (M) Phospho (ST)[0100000200000000];LFSSITKYSIISE/Phospho (ST)[000000000200000];LFSSITKYSI…	19.850000;18.150000;18.150000;18.150000;16.060000;16.060000;16.060000;15.940000;15.940000	0.010351;0.015311;0.015311;0.015311;0.024774;0.024774;0.024774;0.025468;0.000000	1.700000;0.000000;0.000000;2.090000;0.000000;0.000000;0.120000;0.000000;NA	0.001501979441;0.001015462729;0.001015462729;0.001015462729;0.000627572620;0.000627572620;0.000627572620;0.000610469524;0.000610469524	0.006528;0.004412;0.004412;0.004412;0.002726;0.002726;0.002726;0.002652;0.002652
query5827	750.357	1498.7	2	1498.71	-0.010662	Q;Q	APQEKGFAAFATDF	L;L	387	77	90			48.58	0	0	Solyc11g062130.1.1;Solyc11g062190.1.1	27.78	0.990398	20.1763	cyr_090307_meja_05_2_bi5_p.01896.01896.2_45.213mins	1498.708603[-0.010021];1498.672226[0.026356];1498.744995[-0.046413];1498.664993[0.033589];1498.660126[0.038456];1498.677856[0.020726];1498.716446[-0.017864];1498.658295[0.040287];1498.771774[-0.073192]	LHDSHLVTSXTDM/Oxidation (M)[000000000000010];LHDSHLVTSXTDM/Oxidation (M)[000000000000010];GVVGLKSTYGRTDM/Oxidation (M)[0000000000000010];DVFPPEYKAATDM/Oxidation (M)[000000000000010];SITAFKMFGITGM/Oxidation (M) Phospho (ST)[020000000000010];ISTKTMALSAAYF/Oxidation (M) Phospho (ST)[002000100000000];ESDRRKAGFADTF/;DTHGTNRKHATDM/Oxidation (M)[000000000000010];ISTALMTIGIAIVT/Oxidation (M) Phospho (ST)…	20.800000;20.800000;20.310000;18.990000;18.260000;17.610000;17.230000;16.770000;16.720000	0.008318;0.008318;0.009311;0.012618;0.014928;0.017338;0.018923;0.021038;0.000000	0.000000;0.490000;1.320000;0.730000;0.650000;0.380000;0.460000;0.050000;NA	0.001651237983;0.001651237983;0.001475059946;0.001088452974;0.000920046272;0.000792154092;0.000725787811;0.000652844380;0.000645371333	0.007177;0.007177;0.006411;0.004730;0.003998;0.003442;0.003153;0.002836;0.002804
query7290	817.409	1632.8	2	1632.78	0.024801	A	YAVGASFKGTDFSNAV	L	234	152	167			49.05	1	0	Solyc03g082890.2.1	27.24	0.990889	20.4044	cyr_090307_meja_05_2_bi4_p.01654.01654.2_39.030mins	1632.791290[0.011908];1632.714859[0.088339];1632.745377[0.057821];1632.800201[0.002997];1632.814133[-0.010935];1632.712845[0.090353];1632.739594[0.063604];1632.825348[-0.022150];1632.710663[0.092535]	NFTAGIVGLGGSKVSF/Phospho (ST)[000000000000000200];TSSVSSSSSSSLSVNSM/;MWQPATPQESQTIT/Oxidation (M)[0100000000000000];AGGMTRHTRTSKSDL/Oxidation (M)[00001000000000000];SRSVPVLTNMSQVDT/;DDSSGHVHSYSVRST/;RTIQLEYTDAKES/Phospho (ST)[002000000000000];NLGRCSIAVNGKSVDT/;FSVIGLCVADSQVDT/Phospho (ST)[00200000000000000]	21.810000;20.760000;20.360000;20.320000;18.010000;17.200000;16.990000;16.590000;16.060000	0.006592;0.008395;0.009204;0.009290;0.015812;0.019055;0.019999;0.021928;0.000000	1.050000;0.400000;0.040000;2.310000;0.810000;0.210000;0.400000;0.530000;NA	0.001870790140;0.001469011083;0.001339754031;0.001327471092;0.000779875132;0.000647179977;0.000616630600;0.000562373791;0.000497765821	0.008132;0.006385;0.005822;0.005769;0.003388;0.002812;0.002679;0.002443;0.002162
query3635	637.409	1272.8	2	1272.79	0.011663	Q	KVQLILNHVIP	K	248	103	113			39.38	1	0	Solyc07g053540.1.1	26.26	0.989927	19.9684	cyr_090307_meja_05_2_bi4_p.01745.01745.2_41.398mins	1272.755386[0.048056];1272.714981[0.088461];1272.737640[0.065802];1272.791763[0.011679];1272.707779[0.095663];1272.737625[0.065817];1272.744171[0.059271];1272.744141[0.059301];1272.707748[0.095694]	QINLNIIHLPV/;DLVRGRLESTK/;KKACHLKVFTV/;ILTHPKLKNLP/;DLVHIVYSLSK/;KAKHAMFVTLK/;LXVQAAVLVFIS/;LNKILLTPAYQ/;QKAAYAIDAIPL/	13.120000;10.180000;9.960000;9.950000;9.250000;9.140000;8.900000;8.460000;7.850000	0.048753;0.095940;0.100925;0.101158;0.118850;0.121899;0.128825;0.142561;0.000000	2.940000;0.220000;0.010000;0.700000;0.110000;0.240000;0.440000;0.610000;NA	0.002342087569;0.001190153914;0.001131366015;0.001128763946;0.000960733930;0.000936705627;0.000886345673;0.000800945801;0.000695990207	0.010183;0.005172;0.004916;0.004905;0.004174;0.004070;0.003851;0.003480;0.003024
query13136	1080	2157.98	2	2158	-0.014978	K	ISMSEEDLLNAAGETYSVTL	S	171	126	145	Oxidation (M)	[0001000000000000000000]	42.76	1	0	Solyc04g082010.1.1	25.74	0.985366	18.3464	cyr_090307_meja_05_2_bi3_p.02014.02014.2_48.184mins	2158.009979[-0.026239];2157.912842[0.070898];2157.912842[0.070898];2157.922333[0.061407];2158.005951[-0.022211];2158.038086[-0.054346];2158.038086[-0.054346];2158.038086[-0.054346];2158.038086[-0.054346]	TMVTELDLSDNSFSKGLTNS/;SYTVVSDKSCGGKLCIPEI/2 Phospho (ST)[020000000200000000000];SYTVVSDKSCGGKLCIPEI/2 Phospho (ST)[020000200000000000000];TMTLYPTIDSHILKAKS/3 Phospho (ST)[0000000200200000020];DSMVMLMEPKCRGLSGVLL/Phospho (ST)[000000000000000200000];CINLSLTPANLLSSISFQAS/Phospho (ST)[0000000000000000200000];CINLSLTPANLLSSISFQAS/Phospho (ST)[0000000000000020000000];CINLSLTPANLLSSISFQAS/Phospho (ST)[0…	17.020000;16.680000;16.680000;15.010000;14.690000;13.110000;13.110000;13.110000;11.580000	0.019861;0.021478;0.021478;0.031550;0.033963;0.048865;0.048865;0.048865;0.000000	0.340000;0.000000;1.670000;0.320000;1.580000;0.000000;0.000000;1.530000;NA	0.002627832323;0.002429951751;0.002429951751;0.001654236695;0.001536730285;0.001068064918;0.001068064918;0.001068064918;0.000750926880	0.011428;0.010566;0.010566;0.007190;0.006679;0.004641;0.004641;0.004641;0.003262
query15418	811.111	2430.31	3	2430.33	-0.020607	Q	KVQLILNHVIPKFYTFDDLQ	T	248	103	122			43.83	1	0	Solyc07g053540.1.1	25.62	0.986781	18.7879	cyr_090307_meja_05_2_bi3_p.01968.01968.3_46.994mins	2430.409729[-0.099220];2430.329102[-0.018593];2430.309494[0.001015];2430.210648[0.099861];2430.303772[0.006737];2430.328674[-0.018165];2430.366180[-0.055671];2430.333160[-0.022651];2430.257706[0.052803]	KLTNFSLLKLATSSTAALPTLLQ/;DSLCAVVIDEDIIVTKSKLELK/;LNLYCLLLVICYWSFLLXLQ/;SSIKRLPLDCIVRESQSVLK/2 Phospho (ST)[0220000000000000000000];NFLTFLLVPIMATILIQFLQ/Oxidation (M) Phospho (ST)[0000000000010200000000];IRKKYDLKLQEVEATYLLK/Phospho (ST)[000000000000000200000];LVLSXLVSSVFTLSSITLTYLAG/;LVLSXLVSSVFTLSSITLTYLAG/Oxidation (M)[0000010000000000000000000];PSGVATRSMDRDVLFEEVPVVK/	18.210000;16.880000;16.880000;16.880000;14.750000;13.180000;13.050000;13.050000;13.030000	0.015101;0.020512;0.020512;0.020512;0.033497;0.048084;0.049545;0.049545;0.000000	1.330000;0.000000;0.000000;2.130000;1.570000;0.130000;0.000000;0.020000;NA	0.002705331964;0.001991684593;0.001991684593;0.001991684593;0.001219608841;0.000849611855;0.000824556774;0.000824556774;0.000820768280	0.011765;0.008658;0.008658;0.008658;0.005300;0.003691;0.003582;0.003582;0.003566
query9979	931.436	1860.86	2	1860.89	-0.028788	E	NNSLSYEISFTSKRSE	D	777	721	736			46.94	1	0	Solyc06g062950.1.1	25.3	0.986985	18.8556	cyr_090307_meja_05_2_bi7_p.01547.01547.2_35.762mins	1860.863342[-0.006800];1860.853149[0.003393];1860.784866[0.071676];1860.836212[0.020330];1860.836212[0.020330];1860.836700[0.019842];1860.900635[-0.044093];1860.929169[-0.072627];1860.815598[0.040944]	DLSKLEMAALWRYW/Phospho (ST)[0002000000000000];DLSMTVVKSLVMLIH/Oxidation (M) 2 Phospho (ST)[00021200000000000];FTAEEFHRTLGPSPL/2 Phospho (ST)[00000000020002000];MSSMEKIRSLETGSPI/Oxidation (M) Phospho (ST)[000010000000002000];MSSMEKIRSLETGSPI/Oxidation (M) Phospho (ST)[010000000000002000];NNSKVGGSSKYGANNVSV/Phospho (ST)[00020000000000000000];NEFGFPKTHPTTNTSIA/;VESISAFMGTLKPGTPGPG/Oxidation (M)[0000…	21.640000;18.570000;18.570000;18.570000;18.570000;18.250000;17.900000;17.130000;15.800000	0.006855;0.013900;0.013900;0.013900;0.013900;0.014962;0.016218;0.019364;0.000000	3.070000;0.000000;0.000000;0.000000;0.320000;0.350000;0.770000;1.330000;NA	0.002912800019;0.001436516666;0.001436516666;0.001436516666;0.001436516666;0.001334475697;0.001231149148;0.001031123462;0.000759120411	0.012669;0.006243;0.006243;0.006243;0.006243;0.005799;0.005350;0.004480;0.003298
query3128	617.808	1233.6	2	1233.57	0.029669	S	SLSVDAGVDEKD	A	172	74	85			49.76	1	0	Solyc01g087520.2.1	25.12	0.98986	19.9397	cyr_090307_meja_05_2_bi5_p.01275.01275.2_28.982mins	1233.681625[-0.079477];1233.554688[0.047460];1233.583725[0.018423];1233.510071[0.092077];1233.653976[-0.051828];1233.606354[-0.004206];1233.700241[-0.098093];1233.589371[0.012777];1233.608841[-0.006693]	SLISTIASVTATA/;EEKDKVPMNE/Oxidation (M)[000000001000];ISVSDDSTRTPG/;KFMTNLDAQA/Oxidation (M) Phospho (ST)[000120000000];LSSVWRSMGIV/;VTWDIKECIQ/;KMSLXSLVAISL/Oxidation (M)[00100000000000];SIADDIPTPLI/Phospho (ST)[0000000020000];ISSVNIEETDK/	24.640000;21.250000;20.660000;20.090000;19.900000;18.630000;17.770000;17.100000;16.490000	0.003436;0.007499;0.008590;0.009795;0.010233;0.013709;0.016711;0.019498;0.000000	3.390000;0.590000;0.570000;0.190000;1.270000;0.860000;0.670000;0.610000;NA	0.003044905847;0.001394998909;0.001217794107;0.001068006432;0.001022289425;0.000763086672;0.000625999330;0.000536505117;0.000466201716	0.013244;0.006063;0.005292;0.004641;0.004442;0.003315;0.002720;0.002331;0.002025
query15849	1240.11	2478.21	2	2478.18	0.026296	A	RAFFVFGDSLVDSGNNNYLATTA	R	363	24	46			44.93	1	0	Solyc11g006250.1.1	23.58	0.969986	15.2268	cyr_090307_meja_05_2_bi4_p.02077.02077.2_50.039mins	2478.215118[-0.007258];2478.284531[-0.076671];2478.284531[-0.076671];2478.136261[0.071599];2478.172821[0.035039];2478.163910[0.043950];2478.113632[0.094228];2478.113632[0.094228];2478.120316[0.087544]	TVEIIMSTIGDVRLMSVSAFVV/2 Oxidation (M) Phospho (ST)[000000100000000120000000];TKNVFVVIATSVTLSFAVSLGMV/Oxidation (M) Phospho (ST)[0000000000020000000000100];TKNVFVVIATSVTLSFAVSLGMV/Oxidation (M) Phospho (ST)[0000000000200000000000100];PISNFSRNAKSGGVDTMVNFKN/Oxidation (M) Phospho (ST)[000200000000000001000000];MGAVFLMREITGKYFYIDTK/Oxidation (M) Phospho (ST)[0100000000000000000200];GNDDTNEGQTKVPKILD…	21.350000;21.300000;21.300000;20.630000;20.220000;19.680000;19.280000;19.280000;18.660000	0.007328;0.007413;0.007413;0.008650;0.009506;0.010765;0.011803;0.011803;0.000000	0.050000;0.000000;0.670000;0.410000;0.540000;0.400000;0.000000;0.620000;NA	0.004253686069;0.004204994527;0.004204994527;0.003603839449;0.003279181347;0.002895779137;0.002640981961;0.002640981961;0.002289630675	0.018513;0.018301;0.018301;0.015680;0.014265;0.012594;0.011485;0.011485;0.009955
query5557	732.378	1462.74	2	1462.7	0.044164	A;A;A	KYGDKSVYFDLE	D;D;D	146	51	62			37.1	0	0	Solyc03g120640.2.1;Solyc06g066640.2.1;Solyc12g044280.1.1	23.38	0.971977	15.5248	cyr_090307_meja_05_2_bi5_p.01612.01612.2_37.807mins	1462.659225[0.082937];1462.659225[0.082937];1462.803131[-0.060969];1462.647217[0.094945];1462.710892[0.031270];1462.704742[0.037420];1462.716614[0.025548];1462.677841[0.064321];1462.682770[0.059392]	KSIDSAYSGTLLE/Phospho (ST)[000000002000000];KSIDSAYSGTLLE/Phospho (ST)[000000000020000];TVVAKGYLKAGDIE/;KLLEMMGAFYDN/2 Oxidation (M)[00000110000000];FLDFDKKLVTAS/Phospho (ST)[00000000000020];MIDMGPLVIDKAE/2 Oxidation (M)[010010000000000];MLDFYLKNYQL/Oxidation (M)[0100000000000];KSMIEKKFDIE/Oxidation (M) Phospho (ST)[0021000000000];FIDTIDDEPIQGT/	13.720000;12.890000;12.360000;12.200000;12.020000;11.830000;11.640000;11.500000;10.480000	0.042462;0.051404;0.058076;0.060256;0.062806;0.065615;0.068549;0.070795;0.000000	0.830000;0.530000;0.160000;0.180000;0.190000;0.190000;0.140000;1.020000;NA	0.004463298467;0.003686853914;0.003263291951;0.003145255495;0.003017560108;0.002888390645;0.002764750401;0.002677046591;0.002116683526	0.019427;0.016041;0.014195;0.013681;0.013125;0.012562;0.012024;0.011642;0.009202
query3524	633.308	1264.6	2	1264.62	-0.015407	A	FTFGLVYGSMK	L	54	23	33	Oxidation (M)	[0000000000100]	52.22	1	0	Solyc01g110540.2.1	23.33	0.991456	20.6835	cyr_090307_meja_05_2_bi11_p.02040.02040.2_41.748mins	1264.667969[-0.067165];1264.667969[-0.067165];1264.640686[-0.039882];1264.541061[0.059743];1264.541061[0.059743];1264.667969[-0.067165];1264.631592[-0.030788];1264.631592[-0.030788];1264.541046[0.059758]	LAGLIVSPTLTT/Phospho (ST)[00000000020000];LAGLIVSPTLTT/Phospho (ST)[00000002000000];MKLIEVMAPTT/2 Oxidation (M)[0100000100000];TFITSCIAQTT/Phospho (ST)[0000020000000];TFITSCIAQTT/Phospho (ST)[0000200000000];LAGLIVSPTLTT/Phospho (ST)[00000000000200];KEPITVTVPTT/Phospho (ST)[0000000200000];KEPITVTVPTT/Phospho (ST)[0000020000000];LTFISSISNCT/Phospho (ST)[0000002000000]	28.890000;23.550000;21.290000;18.110000;18.110000;18.030000;15.600000;15.600000;15.520000	0.001291;0.004416;0.007430;0.015453;0.015453;0.015740;0.027542;0.027542;0.000000	5.340000;2.260000;3.180000;0.000000;0.080000;2.430000;0.000000;0.080000;NA	0.004605465586;0.001346708314;0.000800338191;0.000384834094;0.000384834094;0.000377810081;0.000215910390;0.000215910390;0.000211969581	0.020047;0.005853;0.003477;0.001672;0.001672;0.001641;0.000938;0.000938;0.000921
query4434	673.866	1345.72	2	1345.7	0.020467	L	VEEDKLELATSL	L	483	318	329			54.57	1	0	Solyc07g066610.2.1	23.29	0.983236	17.7563	cyr_090307_meja_05_2_bi5_p.01700.01700.2_40.099mins	1345.697662[0.020452];1345.669998[0.048116];1345.752670[-0.034556];1345.734940[-0.016826];1345.631226[0.086888];1345.631226[0.086888];1345.654755[0.063359];1345.708893[0.009221];1345.695175[0.022939]	GLDDISLELATSL/;MVLEKGNAIADW/;TMSSIIVELQLL/;PCTVTVLLMLAGL/Oxidation (M)[000000000100000];MSSSNKKAITLS/Phospho (ST)[00002000000000];MSSSNKKAITLS/Phospho (ST)[00020000000000];VTRMDEELSGPI/;KKVAGDDXLATIS/;WTTLLMPLDGSI/	31.280000;28.640000;28.220000;27.880000;26.150000;26.150000;24.520000;24.120000;22.210000	0.000745;0.001368;0.001507;0.001629;0.002427;0.002427;0.003532;0.003873;0.000000	2.640000;0.420000;0.340000;1.730000;0.000000;1.630000;0.400000;1.910000;NA	0.004609542930;0.002509908354;0.002278546332;0.002106967633;0.001414678861;0.001414678861;0.000971981198;0.000886457388;0.000571028605	0.020065;0.010914;0.009907;0.009160;0.006148;0.006148;0.004223;0.003852;0.002481
query12285	692.412	2074.21	3	2074.16	0.053335	Q	KVQLILNHVIPKFYTFD	D	248	103	119			32.2	1	0	Solyc07g053540.1.1	22.96	0.963506	14.3777	cyr_090307_meja_05_2_bi5_p.01909.01909.3_45.543mins	2074.154343[0.060522];2074.237427[-0.022562];2074.201279[0.013586];2074.145538[0.069327];2074.193848[0.021017];2074.160812[0.054053];2074.136368[0.078497];2074.160873[0.053992];2074.150986[0.063879]	IGAFLGRSPMVKSCARVLIG/;KASKFLKNLKVNSKREKG/;KKYGPVMLLQFGSKPVIVA/;KRVKEEMIKAEELAKKE/Oxidation (M)[0000000100000000000];KLLDYKRLIGDAKKLWD/;LKHEKIPLAVEACKAPAEK/;KKVKIDSFVLHNLYWGQ/;LAGLAFKTDLLTGAMVRKGP/Oxidation (M)[0000000000000001000000];KILLGIGGGHYVPRHMDIV/	9.240000;9.200000;9.200000;9.200000;9.010000;7.660000;7.530000;7.170000;6.850000	0.119124;0.120226;0.120226;0.120226;0.125603;0.171396;0.176604;0.191867;0.000000	0.040000;0.000000;0.000000;0.190000;1.350000;0.130000;0.360000;0.320000;NA	0.004873649037;0.004828967154;0.004828967154;0.004828967154;0.004622258730;0.003387304596;0.003287412872;0.003025897771;0.002810957319	0.021218;0.021023;0.021023;0.021023;0.020121;0.014736;0.014301;0.013161;0.012225
query2987	612.304	1222.59	2	1222.59	-0.001079	F;F	NKVNYANVSTN	N;N	139	118	128			47.81	0	0	Solyc06g083680.2.1;Solyc09g063130.2.1	22.91	0.972041	15.5348	cyr_090307_meja_05_2_bi7_p.01035.01035.2_23.516mins	1222.540054[0.053060];1222.637970[-0.044856];1222.622711[-0.029597];1222.586334[0.006780];1222.637970[-0.044856];1222.557831[0.035283];1222.527100[0.066014];1222.524811[0.068303];1222.539993[0.053121]	STKCNAAWGATN/;NIKNLLMFTN/Oxidation (M)[000000010000];CESTLKKLXTN/;ECSTLKKEATGG/;IPYGCKSLKXN/;GNYAGAAGSAAVTGG/;KNGSSYLEFV/Phospho (ST)[000020000000];QNVNSATTMQN/Oxidation (M)[0000000001000];KNVPTPPLPT/2 Phospho (ST)[000002000020]	24.900000;23.410000;23.050000;23.050000;23.050000;22.480000;21.950000;21.450000;21.140000	0.003236;0.004560;0.004955;0.004955;0.004955;0.005649;0.006383;0.007161;0.000000	1.490000;0.360000;0.000000;0.000000;0.570000;0.530000;0.500000;0.310000;NA	0.004973756365;0.003529266940;0.003248512243;0.003248512243;0.003248512243;0.002848947905;0.002521648262;0.002247421379;0.002092591746	0.021655;0.015355;0.014131;0.014131;0.014131;0.012390;0.010965;0.009771;0.009098
query5163	711.985	1421.96	2	1421.9	0.058918	H	IIGVGVVLGLKNIGA	L	131	115	129			35.58	1	0	Solyc08g006930.2.1	22.85	0.97866	16.7081	cyr_090307_meja_05_2_bi3_p.02080.02080.2_49.904mins	1421.885712[0.070194];1421.885727[0.070179];1421.919418[0.036488];1421.958496[-0.002590];1421.896988[0.058918];1421.860687[0.095219];1421.908188[0.047718];1421.860657[0.095249];1421.860657[0.095249]	KAIVDAIPLEILK/;ILQLAVLGADLAIL/;LRIGVKARNVAII/;IIQLIGSIVLLLK/;IGVGVVLGLKNIGAL/;VVGGVIVVVVVGGGVGG/;ILGNVKRLVLLAN/;VVVGGGGVAAAVVIVVG/;VVAAAVVVVIVVGGGGG/	12.730000;9.510000;9.490000;8.990000;8.870000;8.700000;8.540000;7.840000;7.750000	0.053333;0.111944;0.112460;0.126183;0.129718;0.134896;0.139959;0.164437;0.000000	3.220000;0.020000;0.500000;0.120000;0.170000;0.160000;0.700000;0.090000;NA	0.005077290525;0.002418978535;0.002407864338;0.002146011350;0.002087526583;0.002007391194;0.001934781895;0.001646766466;0.001612991262	0.022107;0.010518;0.010470;0.009330;0.009075;0.008727;0.008411;0.007158;0.007011
query15424	1216.52	2431.02	2	2431.04	-0.019968	K	IEKFQSEEQQQTEDELQDK	I	222	45	63	Phospho (ST)	[000000200000000000000]	51.6	1	0	caseinbeta	22.82	0.992976	21.5339	cyr_090307_meja_05_2_bi4_p.01321.01321.2_30.333mins	2431.042770[-0.019968];2431.120285[-0.097483];2430.953903[0.068899];2430.970581[0.052221];2431.120926[-0.098124];2431.120926[-0.098124];2431.120926[-0.098124];2430.987778[0.035024];2430.987778[0.035024]	IEKFQSEEQQQTEDELQDK/Phospho (ST)[000000000000200000000];YAGDRVAVVVADSQMSADVAART/Phospho (ST)[0000000000000000200000000];DVEKQTMSVYNDVDELKEN/Oxidation (M) 2 Phospho (ST)[000000212000000000000];SSERRKLNEDTEDEKIDK/3 Phospho (ST)[02200000000200000000];KIGFSIHRTSWYDEEGGIAVS/Phospho (ST)[00000000002000000000000];KIGFSIHRTSWYDEEGGIAVS/Phospho (ST)[00000000020000000000000];KIGFSIHRTSWYDEEGGIAVS/Phospho (…	28.780000;18.570000;16.020000;15.630000;13.850000;13.850000;13.850000;13.630000;13.630000	0.001324;0.013900;0.025003;0.027353;0.041210;0.041210;0.041210;0.043351;0.000000	10.210000;2.550000;0.390000;1.780000;0.000000;0.000000;0.220000;0.000000;NA	0.005187266441;0.000494240757;0.000274750541;0.000251153107;0.000166701135;0.000166701135;0.000166701135;0.000158466898;0.000158466898	0.022587;0.002147;0.001193;0.001091;0.000724;0.000724;0.000724;0.000688;0.000688
query8355	859.457	1716.9	2	1716.85	0.045597	-;-	MIYDVNSPLFRSFL	S;S	49	1	14	Oxidation (M)	[0100000000000000]	38.29	0	0	Solyc06g063390.2.1;Solyc06g083340.2.1	22.75	0.966546	14.7555	cyr_090307_meja_05_2_bi3_p.02170.02170.2_52.260mins	1716.842606[0.057514];1716.850510[0.049610];1716.822296[0.077824];1716.842041[0.058079];1716.819641[0.080479];1716.916046[-0.015926];1716.842041[0.058079];1716.904602[-0.004482];1716.981430[-0.081310]	KDMMLEKVSIKSXN/2 Oxidation (M)[0001100000000000];PGLQAELIGSMVGGFAGN/;KTGGLTVYDDIEITL/Phospho (ST)[00200000000000000];NAANPRVRSITSKHS/Phospho (ST)[00000000000000020];KGGTGRAVLGSTSGSGFV/Phospho (ST)[00002000000000000000];LFYSLQMISFALALT/;NAANPRVRSITSKHS/Phospho (ST)[00000000000020000];AIARASGLPENTLYIE/;VVILLVSIIASYWAGN/	15.540000;14.640000;14.580000;14.240000;14.050000;14.030000;13.320000;13.150000;13.110000	0.027925;0.034356;0.034834;0.037670;0.039355;0.039537;0.046559;0.048417;0.000000	0.900000;0.060000;0.340000;0.190000;0.020000;0.710000;0.170000;0.040000;NA	0.005131240210;0.004170828629;0.004113602715;0.003803840918;0.003641013975;0.003624285036;0.003077672088;0.002959527269;0.002932394160	0.022342;0.018152;0.017902;0.016551;0.015842;0.015769;0.013387;0.012872;0.012754
query13848	1116.61	2231.2	2	2231.11	0.093038	F;F	ASGSDENDVVVIGGGPGGYVAAIK	A;A	501	31	54			53.55	0	0	Solyc05g053300.2.1;Solyc12g099100.1.1	22.75	0.98498	18.2334	cyr_090307_meja_05_2_bi4_p.01739.01739.2_41.228mins	2231.157913[0.042135];2231.157913[0.042135];2231.157913[0.042135];2231.274979[-0.074931];2231.131958[0.068090];2231.114975[0.085073];2231.114975[0.085073];2231.257172[-0.057124];2231.163269[0.036779]	TTKSLIIGVLGTTEKKVQGV/2 Phospho (ST)[0020200000000000000000];TTKSLIIGVLGTTEKKVQGV/2 Phospho (ST)[0200200000000000000000];TTKSLIIGVLGTTEKKVQGV/2 Phospho (ST)[0220000000000000000000];VYRNGKDRGLVVDSKKIAXL/;GVLGSAYKAKMGNGMSVVVKR/Phospho (ST)[00000200000000000000000];SPLKAKSIRTLVVSMAAVGAG/Oxidation (M) 2 Phospho (ST)[02000000002000010000000];SPLKAKSIRTLVVSMAAVGAG/Oxidation (M) 2 Phospho (ST)[0200000200…	30.800000;30.800000;27.260000;22.820000;18.440000;18.310000;18.310000;18.270000;17.220000	0.000832;0.000832;0.001879;0.005224;0.014322;0.014757;0.014757;0.014894;0.000000	0.000000;3.540000;4.440000;4.380000;0.130000;0.000000;0.040000;1.050000;NA	0.005229107536;0.005229107536;0.002314342193;0.000832583065;0.000303687959;0.000294732191;0.000294732191;0.000292030070;0.000229312418	0.022769;0.022769;0.010063;0.003617;0.001319;0.001280;0.001280;0.001268;0.000996
query1629	524.767	1047.52	2	1047.54	-0.018306	Q	GAGMVGKVTVN	-	171	160	170	Oxidation (M)	[0000100000000]	42.97	1	0	Solyc04g082010.1.1	22.67	0.972625	15.6265	cyr_090307_meja_05_2_bi3_p.01123.01123.2_24.963mins	1047.538269[-0.018275];1047.553528[-0.033534];1047.449875[0.070119];1047.618896[-0.098902];1047.618896[-0.098902];1047.500153[0.019841];1047.513107[0.006887];1047.501892[0.018102];1047.589920[-0.069926]	QGMVEKKNV/Oxidation (M)[00010000000];KGKCSIVQX/;QTRVVHND/Phospho (ST)[0020000000];KGKSFLRVN/;KGVFRKKEG/;SKKSGYVIS/Phospho (ST)[00000000020];KRMGEAQVN/Oxidation (M)[00010000000];ANTNVGLMVN/Oxidation (M)[000000001000];KMRVVWTI/Oxidation (M)[0010000000]	20.300000;19.450000;18.750000;17.270000;16.780000;16.780000;16.750000;16.650000;16.560000	0.009333;0.011350;0.013335;0.018750;0.020989;0.020989;0.021135;0.021627;0.000000	0.850000;0.700000;1.480000;0.490000;0.000000;0.030000;0.100000;0.090000;NA	0.005259512103;0.004324595169;0.003680827448;0.002617854223;0.002338543533;0.002338543533;0.002322445112;0.002269579807;0.002223030692	0.022902;0.018822;0.016015;0.011384;0.010168;0.010168;0.010098;0.009868;0.009665
query10349	947.952	1893.89	2	1893.9	-0.010309	R;R	MVSAHASQQIYTRATNT	-;-	109	92	108	Oxidation (M)	[0100000000000000000]	45.28	0	0	Solyc02g069850.2.1;Solyc10g052660.1.1	22.5	0.985614	18.4206	cyr_090307_meja_05_2_bi4_p.01170.01170.2_26.372mins	1893.934189[-0.044199];1893.948090[-0.058100];1893.901917[-0.011927];1893.808060[0.081930];1893.875061[0.014929];1893.909348[-0.019358];1893.909348[-0.019358];1893.869431[0.020559];1893.967331[-0.077341]	FTRHATNMFKGVNKMP/Oxidation (M)[000000001000000000];KPHYSSKKLFEVMGMP/Oxidation (M)[000000000000010000];PDSIRQEIQKSAPKSM/Phospho (ST)[000000000000000200];FVFGNTQENATRLMNG/Oxidation (M) Phospho (ST)[000000000002001000];FSKVASQASKRLGQVE/2 Phospho (ST)[002000000200000000];VMPGLVAPNSVLRMSXI/Oxidation (M) Phospho (ST)[0010000000000002000];VMPGLVAPNSVLRMSXI/Oxidation (M) Phospho (ST)[0010000000200000000]…	22.780000;19.410000;16.790000;15.740000;14.550000;14.240000;14.240000;13.890000;13.800000	0.005272;0.011455;0.020941;0.026669;0.035075;0.037670;0.037670;0.040832;0.000000	3.370000;2.620000;1.050000;1.190000;0.310000;0.000000;0.350000;0.090000;NA	0.005542515573;0.002550979227;0.001395426358;0.001095738502;0.000833118776;0.000775723453;0.000775723453;0.000715660293;0.000700982090	0.024138;0.011093;0.006064;0.004761;0.003620;0.003370;0.003370;0.003109;0.003045
query7519	551.31	1650.91	3	1650.91	-0.001365	L	VTFGDTNLAIFRVAK	F	203	169	183			32.5	1	0	Solyc01g009080.2.1	22.41	0.96418	14.4587	cyr_090307_meja_05_2_bi3_p.01860.01860.3_44.181mins	1650.932098[-0.024115];1650.945709[-0.037726];1650.832047[0.075936];1650.909302[-0.001319];1650.847321[0.060662];1650.868912[0.039071];1650.861725[0.046258];1650.824677[0.083306];1650.817078[0.090905]	VVKALSGLIAKASTLT/Phospho (ST)[000000200000000000];YRSITNLQIGKVIF/;TAMTEERIAAMSLLV/Oxidation (M)[00010000000000000];YDIKGSALAIRNLAF/;IKKCMAIHEVYVTT/Oxidation (M)[0000010000000000];SGHIPENITSLRNLT/;GYVTAQDIILPPHVE/;MTNSVDSRIKLSVDS/;NAITFFKLNTGAKF/Phospho (ST)[0000200000000000]	10.090000;10.010000;9.310000;8.520000;7.970000;7.920000;7.890000;7.700000;7.550000	0.097949;0.099770;0.117220;0.140605;0.159588;0.161436;0.162555;0.169824;0.000000	0.080000;0.700000;0.790000;0.550000;0.050000;0.030000;0.190000;0.150000;NA	0.005535514688;0.005434480158;0.004625492780;0.003856186301;0.003397488594;0.003358597864;0.003335477439;0.003192699229;0.003084309897	0.024107;0.023666;0.020135;0.016780;0.014780;0.014611;0.014510;0.013888;0.013416
query9316	600.973	1799.9	3	1799.92	-0.019174	L	EGRSTPVKFSAHLKED	E	172	150	165			39.74	1	0	Solyc01g087520.2.1	21.99	0.958719	13.8425	cyr_090307_meja_05_2_bi4_p.01178.01178.3_26.584mins	1799.806992[0.090429];1799.864105[0.033316];1799.800858[0.096563];1799.908722[-0.011301];1799.872345[0.025076];1799.978119[-0.080698];1799.878693[0.018728];1799.859390[0.038031];1799.924011[-0.026590]	QMGDVMIQFTSESIAQ/Oxidation (M)[000000100000000000];QMVRTLKEHTYSVL/Oxidation (M) Phospho (ST)[0010020000000000];AGDFALTSKFSGKRVG/2 Phospho (ST)[000000022000000000];KLDSDGDSKXEHCLLL/;KLDSDGDSKXEHCLLL/;KSDGILIQREWETIL/;KDTDAVSRALRMKVM/Phospho (ST)[00000002000000000];FADLGLSLVGEAEISLS/Phospho (ST)[0000000000000002000];KIMGTNVDSPFHITQI/	17.750000;17.750000;17.490000;16.640000;16.640000;16.640000;15.190000;14.750000;14.630000	0.016788;0.016788;0.017824;0.021677;0.021677;0.021677;0.030269;0.033497;0.000000	0.000000;0.260000;0.850000;0.000000;0.000000;1.450000;0.440000;0.120000;NA	0.006063052581;0.006063052581;0.005710726149;0.004695602602;0.004695602602;0.004695602602;0.003362724861;0.003038724551;0.002955910870	0.026412;0.026412;0.024872;0.020441;0.020441;0.020441;0.014629;0.013217;0.012856
query6833	534.333	1599.98	3	1599.94	0.033715	Q	PIAIFTINKVLMPK	E	416	317	330	Oxidation (M)	[0000000000001000]	36.86	1	0	Solyc10g005960.1.1	21.83	0.98457	18.1163	cyr_090307_meja_05_2_bi3_p.01914.01914.3_45.583mins	1599.909653[0.066262];1599.916824[0.059091];1599.876617[0.099298];1599.884491[0.091424];1599.894440[0.081475];1599.959961[0.015954];1599.878937[0.096978];1599.919540[0.056375];1599.886124[0.089791]	RLLGIFGLKTSANPN/;IQKRKSEKSNLRN/;IPAAKGRSISLACSLN/;GRIPNSRIGKLFEN/;PSSVKVKGSKIVGSGGGG/;PLLAALIQLVKTGYT/;ISNIKPKSLKFFV/Phospho (ST)[002000000000000];ALKSSASLSLPITGKQ/;SLKILNKRQIPPN/Phospho (ST)[020000000000000]	15.030000;9.100000;9.020000;8.770000;7.420000;7.260000;5.800000;5.140000;4.250000	0.031405;0.123027;0.125314;0.132739;0.181134;0.187932;0.263027;0.306196;0.000000	5.930000;0.080000;0.250000;1.350000;0.160000;1.460000;0.660000;0.890000;NA	0.006460208641;0.001649098301;0.001618998865;0.001528433487;0.001120073557;0.001079559403;0.000771341227;0.000662592544;0.000539816984	0.028147;0.007168;0.007037;0.006643;0.004867;0.004691;0.003351;0.002879;0.002345
query11304	992.023	1982.03	2	1981.96	0.07491	L	TGAVTPPGFRFVVTSNGEM	L	389	320	338	Oxidation (M)	[000000000000000000010]	37.69	1	0	Solyc05g005480.2.1	20.92	0.955141	13.4815	cyr_090307_meja_05_2_bi3_p.01771.01771.2_41.856mins	1981.948059[0.083653];1981.996429[0.035283];1981.996979[0.034733];1981.977875[0.053837];1982.090866[-0.059154];1981.993149[0.038563];1982.087677[-0.055965];1982.025528[0.006184];1982.044800[-0.013088]	MSINKGTTCVLLVMVFF/Phospho (ST)[0020000000000000000];TKTLLLAIFTMQIKVS/Oxidation (M) 2 Phospho (ST)[000000000021000020];SSLKRNFSRGSFGEVTPN/;DTNVMHNLKDEILLTPN/Oxidation (M)[0000010000000000000];RQQLSKTSPTKILNGTPN/;KTAEPVACDGPFISPPPRT/;LSVLIQPAYFPILNPSPN/;TIRGLTPMQQPVQSVTPN/Oxidation (M)[00000000100000000000];TKTMGWSRFAXKLPVTP/Oxidation (M)[0000100000000000000]	16.770000;15.740000;15.110000;14.890000;14.490000;14.090000;14.060000;13.970000;13.700000	0.021038;0.026669;0.030832;0.032434;0.035563;0.038994;0.039264;0.040087;0.000000	1.030000;0.630000;0.220000;0.400000;0.400000;0.030000;0.090000;0.270000;NA	0.007728009505;0.006096318487;0.005273119914;0.005012653068;0.004571593932;0.004169343219;0.004140641662;0.004055717041;0.003811251845	0.033693;0.026557;0.022961;0.021824;0.019900;0.018145;0.018020;0.017650;0.016584
query23814	1240.11	4956.42	4	4956.4	0.018915	A	RAFFVFGDSLVDSGNNNYLATTARADSPPYGIDYPTRRATGRFSN	G	363	24	68			40.33	1	0	Solyc11g006250.1.1	20.76	0.957533	13.7195	cyr_090307_meja_05_2_bi4_p.02077.02077.4_50.039mins	4956.319443[0.096277];4956.319443[0.096277];4956.319443[0.096277];4956.436600[-0.020880];4956.336624[0.079096];4956.336624[0.079096];4956.489380[-0.073660];4956.489380[-0.073660];4956.489380[-0.073660]	QVMQTALNSDQGRAVFFKPRAPNQIEITESSDVNIKFYLDNP/Oxidation (M) 2 Phospho (ST)[00010200000000000000000000000002000000000000];QVMQTALNSDQGRAVFFKPRAPNQIEITESSDVNIKFYLDNP/Oxidation (M) 2 Phospho (ST)[00010200000000000000000000000020000000000000];QVMQTALNSDQGRAVFFKPRAPNQIEITESSDVNIKFYLDNP/Oxidation (M) 2 Phospho (ST)[00010200000000000000000000002000000000000000];SQFLKGLLSIRFVSDDQKKYLRLYMWILAAGENIYVPEYN/Oxid…	19.570000;19.570000;19.570000;17.040000;15.320000;15.320000;14.680000;14.680000;14.680000	0.011041;0.011041;0.011041;0.019770;0.029376;0.029376;0.034041;0.034041;0.000000	0.000000;0.000000;2.530000;1.720000;0.000000;0.640000;0.000000;0.000000;NA	0.008038109341;0.008038109341;0.008038109341;0.004489044489;0.003021022150;0.003021022150;0.002607077308;0.002607077308;0.002607077308	0.035050;0.035050;0.035050;0.019540;0.013140;0.013140;0.011337;0.011337;0.011337
query8371	859.932	1717.85	2	1717.81	0.043371	R;R	FNKVNYANVSTNNYA	L;L	139	117	131			34.82	0	0	Solyc06g083680.2.1;Solyc09g063130.2.1	20.72	0.946751	12.7368	cyr_090306_meja_005_bi9_2_p.01530.01530.2_32.413mins	1717.840012[0.009328];1717.841660[0.007680];1717.776276[0.073064];1717.787506[0.061834];1717.757660[0.091680];1717.856888[-0.007548];1717.846420[0.002920];1717.841660[0.007680];1717.816483[0.032857]	IDTLEGKGGHNVKTVA/Phospho (ST)[000200000000000000];RATAATVISVVLSVTA/2 Phospho (ST)[000200000000000200];AESGMLVGKPLVGSIT/2 Phospho (ST)[000200000000002000];KRPTMASVVQTLLD/2 Phospho (ST)[0000200000020000];KSEATVPALVVAGTDT/2 Phospho (ST)[002002000000000000];SAKNIPGKVKFLVSA/2 Phospho (ST)[02000000000000200];SFFWTQSSTVRXLP/;RATAATVISVVLSVTA/2 Phospho (ST)[000000200000000200];KKTDKRGGVIVASEA/2 Phospho (…	14.100000;13.940000;13.640000;13.270000;12.380000;11.940000;11.650000;11.590000;11.410000	0.038905;0.040365;0.043251;0.047098;0.057810;0.063973;0.068391;0.069343;0.000000	0.160000;0.300000;0.370000;0.890000;0.440000;0.290000;0.060000;0.180000;NA	0.008021130194;0.007730998083;0.007214987210;0.006625757939;0.005398033377;0.004877930021;0.004562843419;0.004500238861;0.004317532005	0.034976;0.033706;0.031448;0.028871;0.023507;0.021236;0.019862;0.019588;0.018791
query17884	693.875	2771.47	4	2771.42	0.049449	K	VFVRADLNVPLDDSQNITDDTRIR	A	483	95	118			31.26	1	0	Solyc07g066610.2.1	20.69	0.951074	13.1046	cyr_090307_meja_05_2_bi3_p.01697.01697.4_39.924mins	2771.404083[0.065593];2771.396454[0.073222];2771.475220[-0.005544];2771.449356[0.020320];2771.418671[0.051005];2771.399811[0.069865];2771.374252[0.095424];2771.374252[0.095424];2771.374252[0.095424]	RERFKSLSVNLMKDGSLQLQDVL/Oxidation (M) Phospho (ST)[0000002000001000000000000];RFAYLSKSNNKFKIPKIPISFN/2 Phospho (ST)[000000202000000000000000];GDKKTKEKVIPTEPATLKQHGVHCQ/;HPLFSYITTLIPAASSSALSXESPIN/;YKSYVKFSLGVSDEGVLIIVSFKN/Phospho (ST)[00000000000000000000020000];ADVPKYLKLMKPLYARASKRYT/2 Phospho (ST)[000000000000000000200020];ASFSGKVSVSIADAGETAVVVSIVERN/Phospho (ST)[00000000200000000000000000000];…	10.570000;9.660000;8.640000;8.510000;8.390000;8.380000;8.220000;8.220000;8.220000	0.087700;0.108143;0.136773;0.140929;0.144877;0.145211;0.150661;0.150661;0.000000	0.910000;1.020000;0.130000;0.120000;0.010000;0.160000;0.000000;0.000000;NA	0.008113616159;0.006579826744;0.005202528382;0.005049105650;0.004911503503;0.004900207359;0.004722962074;0.004722962074;0.004722962074	0.035381;0.028670;0.022653;0.021984;0.021383;0.021334;0.020560;0.020560;0.020560
query4529	677.375	1352.74	2	1352.69	0.045094	L	MLFAGRFGLAPSA	N	131	64	76	Oxidation (M)	[010000000000000]	36.62	1	0	Solyc08g006930.2.1	20.1	0.9414	12.321	cyr_090307_meja_05_2_bi3_p.01803.01803.2_42.694mins	1352.708847[0.027333];1352.686584[0.049596];1352.716232[0.019948];1352.664612[0.071568];1352.639435[0.096745];1352.679840[0.056340];1352.716232[0.019948];1352.691071[0.045109];1352.683868[0.052312]	SWKFLKVGXSSN/;VMLGLMALTMKN/2 Oxidation (M)[00000010001000];FIFNLCLLVSAN/;MEFLVSTVVGASN/;EMFSIASRSATGP/;FLMAIFPEGKAN/Oxidation (M)[00010000000000];FLMFLLLVNNN/Oxidation (M)[0001000000000];FLMKTWAKAQN/Oxidation (M)[0001000000000];IFYLYFVKMN/Oxidation (M)[000000000100]	16.520000;15.710000;15.190000;15.190000;14.470000;14.380000;14.380000;14.380000;14.380000	0.022284;0.026853;0.030269;0.030269;0.035727;0.036475;0.036475;0.036475;0.000000	0.810000;0.520000;0.000000;0.720000;0.090000;0.000000;0.000000;0.000000;NA	0.009199710968;0.007634387207;0.006772892509;0.006772892509;0.005738180207;0.005620490047;0.005620490047;0.005620490047;0.005620490047	0.040139;0.033283;0.029514;0.029514;0.024992;0.024478;0.024478;0.024478;0.024478
query4138	657.353	1312.69	2	1312.67	0.026052	K	KFVENAATSFSI	A	259	246	257			49.38	1	0	Solyc07g044860.2.1	20.08	0.973539	15.7739	cyr_090307_meja_05_2_bi5_p.01704.01704.2_40.196mins	1312.627563[0.064795];1312.713928[-0.021570];1312.701660[-0.009302];1312.627563[0.064795];1312.627563[0.064795];1312.723816[-0.031458];1312.691452[0.000906];1312.629929[0.062429];1312.602402[0.089956]	ALTSTAVLTGQAT/Phospho (ST)[000002000000000];KQTRFISSFSL/;RKVVASFRAVT/Phospho (ST)[0000002000000];ALTSTAVLTGQAT/Phospho (ST)[000200000000000];ALTSTAVLTGQAT/Phospho (ST)[000020000000000];QAALGLGELIEVT/;FSSIEILASFLS/;SFSNQSLPSFLS/;REAVAANTTTTV/Phospho (ST)[00000000002000]	29.300000;27.390000;22.380000;22.350000;22.190000;21.770000;20.000000;20.000000;19.840000	0.001175;0.001824;0.005781;0.005821;0.006039;0.006653;0.010000;0.010000;0.000000	1.910000;5.010000;0.030000;0.160000;0.420000;1.770000;0.000000;0.160000;NA	0.009557694761;0.006156773214;0.001942464796;0.001929092962;0.001859315786;0.001687925043;0.001122931221;0.001122931221;0.001082313702	0.041708;0.026821;0.008444;0.008386;0.008082;0.007337;0.004880;0.004880;0.004703
query10231	941.53	1881.05	2	1881	0.042118	L;L	IFYFEAGQGKTPLGALGL	-;-	257	239	256			35.12	0	0	Solyc01g105030.2.1;Solyc01g105050.2.1	19.93	0.949393	12.9579	cyr_090307_meja_05_2_bi3_p.02232.02232.2_53.874mins	1881.000259[0.045491];1880.982498[0.063252];1880.998520[0.047230];1880.960052[0.085698];1880.963806[0.081944];1880.963806[0.081944];1880.979462[0.066288];1880.951965[0.093785];1880.969971[0.075779]	SQKKGKNTKFKRSCAGX/;HESQFALIKYTLFWV/;LNLEAVRISKNFXKN/Phospho (ST)[00000000020000000];FLSCLSKGLRAMGIRDD/;YTKKSGRIITTLRGK/2 Phospho (ST)[00000200000200000];YTKKSGRIITTLRGK/2 Phospho (ST)[00000200002000000];RILGLVERLTISMDVA/Oxidation (M) Phospho (ST)[000000000020010000];NILLDADYNAKLSDFGL/;TDCKKTLLSGVGGTLMKN/Oxidation (M)[00000000000000001000]	15.190000;14.970000;14.450000;11.920000;11.910000;11.910000;11.320000;10.380000;9.960000	0.030269;0.031842;0.035892;0.064269;0.064417;0.064417;0.073790;0.091622;0.000000	0.220000;0.520000;2.530000;0.010000;0.000000;0.590000;0.940000;0.420000;NA	0.009648197247;0.009171622553;0.008136660088;0.004544082144;0.004533631045;0.004533631045;0.003957730097;0.003187470496;0.002893651156	0.042105;0.040016;0.035482;0.019780;0.019734;0.019734;0.017222;0.013865;0.012585
query11980	1025.55	2049.09	2	2049.03	0.062261	L	LEASSATVGGKEYYYLSVL	T	259	186	204			29.65	1	0	Solyc07g044860.2.1	19.78	0.932264	11.6918	cyr_090307_meja_05_2_bi3_p.01961.01961.2_46.803mins	2049.054733[0.038137];2049.099823[-0.006953];2049.148346[-0.055476];2049.008438[0.084432];2049.014481[0.078389];2049.014481[0.078389];2049.016907[0.075963];2049.016907[0.075963];2049.019958[0.072912]	IARSLTVYGISYKIDITG/Phospho (ST)[00000000000000000200];NRWKYLLSXLMILAVI/Phospho (ST)[000000002000000000];VNGGRVDYLRVFKIQTKG/;PERLYYSIRVAGNLFTA/Phospho (ST)[0000000000000000200];NIAELSLYIIYCEXITV/Phospho (ST)[0000000000000000200];NIAELSLYIIYCEXITV/Phospho (ST)[0000000000000000200];AGNKGMMVDLNNKMNVAKV/Oxidation (M)[000000010000000000000];AGNKGMMVDLNNKMNVAKV/Oxidation (M)[000000100000000000000];ISAAE…	9.870000;9.620000;9.620000;9.560000;9.000000;9.000000;6.790000;6.790000;6.560000	0.103039;0.109144;0.109144;0.110662;0.125893;0.125893;0.209411;0.209411;0.000000	0.250000;0.000000;0.060000;0.560000;0.000000;2.210000;0.000000;0.230000;NA	0.009807058191;0.009258459949;0.009258459949;0.009131429116;0.008026731804;0.008026731804;0.004825460359;0.004825460359;0.004576555698	0.042802;0.040396;0.040396;0.039839;0.035000;0.035000;0.021007;0.021007;0.019921
query2881	405.594	1213.76	3	1213.73	0.031546	D;D	PKTRYPVVVR	F;F	139	107	116			32.76	0	0	Solyc06g083680.2.1;Solyc09g063130.2.1	19.29	0.930303	11.5678	cyr_090307_meja_05_2_bi8_p.01262.01262.3_26.743mins	1213.693130[0.067939];1213.681915[0.079154];1213.718262[0.042807];1213.674011[0.087058];1213.669601[0.091468];1213.669601[0.091468];1213.674026[0.087043];1213.707047[0.054022];1213.677856[0.083213]	PLHAAVIQKHT/;PQTLVPPPKTH/;PKTRYNPLLI/;PKLMQEVKIE/;KKFRGKAATK/Phospho (ST)[000000000200];KKFRGKTAAK/Phospho (ST)[000000020000];KPMAVISATLAP/Oxidation (M)[00010000000000];KGIIADFPQLL/;PKDERSTIRI/	13.470000;13.470000;12.820000;12.310000;11.480000;11.480000;10.680000;10.340000;10.080000	0.044978;0.044978;0.052240;0.058749;0.071121;0.071121;0.085507;0.092470;0.000000	0.000000;0.650000;0.510000;0.830000;0.000000;0.800000;0.340000;0.260000;NA	0.010955299015;0.010955299015;0.009432444005;0.008387339754;0.006928260932;0.006928260932;0.005762676440;0.005328736381;0.005019081360	0.047841;0.047841;0.041159;0.036579;0.030194;0.030194;0.025099;0.023204;0.021852
query3230	621.875	1241.73	2	1241.71	0.021505	K	VFVRADLNVPL	D	483	95	105			47.42	1	0	Solyc07g066610.2.1	18.37	0.941802	12.351	cyr_090307_meja_05_2_bi5_p.01827.01827.2_43.412mins	1241.655045[0.079671];1241.642105[0.092611];1241.686722[0.047994];1241.713196[0.021520];1241.636368[0.098348];1241.709183[0.025533];1241.672760[0.061956];1241.643799[0.090917];1241.650314[0.084402]	GNGVCGSLIGRIX/;EVVVFRTLVT/Phospho (ST)[000000020000];DLVNTSGTLLPI/;GAKAKTNFPVLP/;GKAANNLAEGALN/;DIGRLSVVRDL/;EVAAALSQALRN/;GAKTXPAQCAVLP/;NTLLIDASDALP/	29.050000;28.800000;27.020000;26.110000;25.320000;23.040000;21.230000;21.220000;21.160000	0.001245;0.001318;0.001986;0.002449;0.002938;0.004966;0.007534;0.007551;0.000000	0.250000;1.780000;0.910000;0.790000;2.280000;1.810000;0.010000;0.060000;NA	0.013707549551;0.012940761241;0.008589340599;0.006965620739;0.005807106949;0.003435261677;0.002264434821;0.002259226765;0.002228229012	0.059943;0.056568;0.037464;0.030357;0.025293;0.014945;0.009845;0.009823;0.009688
query5850	751.375	1500.73	2	1500.75	-0.018641	D;D	DQQDIARGKGLVDS	L;L	440	82	95			36.16	0	0	Solyc09g011080.2.1;Solyc10g086580.1.1	18.28	0.918643	10.896	cyr_090307_meja_05_2_bi3_p.01217.01217.2_27.415mins	1500.725876[0.008718];1500.743332[-0.008738];1500.798325[-0.063731];1500.760590[-0.025996];1500.770126[-0.035532];1500.722504[0.012090];1500.713852[0.020742];1500.704544[0.030050];1500.729706[0.004888]	TGQISLILMTKNS/Oxidation (M) Phospho (ST)[000000000120000];GQWDLARQGLDRS/;LTSNAPGIRKWRC/;ENKDVLKANKMPD/;QDSRVKITFSLK/Phospho (ST)[00000000200000];LDFARSAIVTELS/Phospho (ST)[000000000020000];KQVMKFMCAALES/Oxidation (M)[000000010000000];RRSSKDDTKKNS/Phospho (ST)[00000000200000];RVSGSTSLSKANKS/Phospho (ST)[0000000002000000]	17.880000;17.700000;17.350000;16.760000;16.630000;15.920000;13.760000;12.420000;12.420000	0.016293;0.016982;0.018408;0.021086;0.021727;0.025586;0.042073;0.057280;0.000000	0.180000;0.350000;0.590000;0.130000;0.710000;2.160000;1.340000;0.000000;NA	0.013650441824;0.013096242506;0.012082219139;0.010547431375;0.010236387279;0.008692540212;0.005286237953;0.003882815087;0.003882815087	0.059691;0.057252;0.052792;0.046050;0.044685;0.037916;0.023019;0.016896;0.016896
query13471	1096.54	2191.06	2	2191.01	0.056875	Q	AYFGKTDSEGGFESGAVATANL	L	259	164	185			30.57	1	0	Solyc07g044860.2.1	18.19	0.942744	12.4218	cyr_090307_meja_05_2_bi3_p.01695.01695.2_39.881mins	2191.017090[0.046728];2191.017090[0.046728];2191.023163[0.040655];2191.007523[0.056295];2191.091583[-0.027765];2191.111008[-0.047190];2191.120346[-0.056528];2191.032303[0.031515];2191.057907[0.005911]	KRGENERFSLRDGYSALN/Phospho (ST)[00000000000000020000];KRGENERFSLRDGYSALN/Phospho (ST)[00000000020000000000];MLISPSLQQAEIHSLEAGST/Phospho (ST)[0000000000000000000200];VEPRTISGETRFASLAALN/2 Phospho (ST)[000000000020002000000];NLALNGPDHRMVAAEANTAAR/;LRLSPRPQNTKNTSTTLAN/Phospho (ST)[000000000000020000000];KIFVFVAMTSLSSTMLGCRT/;TEMGNKVCSAKVMLFTSSLN/2 Oxidation (M)[0001000000000100000000];AGGTPPGNSIEMF…	12.380000;10.890000;8.770000;8.310000;7.880000;6.980000;6.950000;6.940000;6.380000	0.057810;0.081470;0.132739;0.147571;0.162930;0.200447;0.201837;0.202302;0.000000	1.490000;2.120000;0.460000;0.430000;0.900000;0.030000;0.010000;0.560000;NA	0.014301895230;0.010148306895;0.006228645189;0.005602651284;0.005074503919;0.004124711640;0.004096317325;0.004086896056;0.003592473657	0.062561;0.044299;0.027135;0.024400;0.022094;0.017950;0.017827;0.017786;0.015630
query11567	1005.53	2009.05	2	2009.04	0.012532	L	AVQSKPPSKRDPPKMQTD	N	202	180	197			37.27	1	0	Solyc05g051750.2.1	18.14	0.9562	13.5853	cyr_090307_meja_05_2_bi4_p.00977.00977.2_21.341mins	2009.038696[0.010228];2009.038696[0.010228];2009.113846[-0.064922];2009.097931[-0.049007];2009.054153[-0.005229];2009.107437[-0.058513];2008.951996[0.096928];2009.002502[0.046422];2008.994431[0.054493]	QIYAQLVQGLWVPKSSL/Phospho (ST)[0000000000000000200];QIYAQLVQGLWVPKSSL/Phospho (ST)[0000000000000002000];KSLGKPIHRQCKQCKQK/;QSIGKMTLVLTDQRLYK/Oxidation (M)[0000001000000000000];EGLLTSGASHKLDADAVXLG/;TRKKSVWIDLKISLGSV/Phospho (ST)[0000020000000000000];SKYGRGGFENPRFKSSL/Phospho (ST)[0000000000000000200];AKVSKSVGKDSSRSGASEET/;KVASAEVMSKYFIGSLLS/Phospho (ST)[00000000000000000020]	19.130000;14.110000;13.520000;13.300000;12.970000;12.950000;12.630000;12.430000;12.420000	0.012218;0.038815;0.044463;0.046774;0.050466;0.050699;0.054576;0.057148;0.000000	5.020000;0.590000;0.220000;0.330000;0.020000;0.320000;0.200000;0.010000;NA	0.014674012545;0.004619009825;0.004032263327;0.003833088848;0.003552621060;0.003536298249;0.003285102207;0.003137248252;0.003130032781	0.064201;0.020107;0.017547;0.016679;0.015456;0.015385;0.014291;0.013646;0.013615
query1777	531.284	1060.55	2	1060.57	-0.012492	G	VSNFDPVKR	T	112	102	110			40.69	1	0	Solyc05g025600.1.1	17.94	0.939431	12.1775	cyr_090307_meja_05_2_bi4_p.01162.01162.2_26.161mins	1060.577759[-0.023707];1060.581131[-0.027079];1060.569901[-0.015849];1060.595032[-0.040980];1060.558655[-0.004603];1060.581787[-0.027735];1060.459030[0.095022];1060.544754[0.009298];1060.508377[0.045675]	GENFRLGLR/;GKDMLRGLR/Oxidation (M)[00001000000];TQAMIVNLR/Oxidation (M)[00001000000];DANMIKKLL/Oxidation (M)[00001000000];DANMLLQKI/Oxidation (M)[00001000000];WNFPRKTL/;FDSDIKTR/Phospho (ST)[0000000200];DGAGMALVRR/Oxidation (M)[000001000000];GRSMGPLGDR/Oxidation (M)[000010000000]	22.750000;19.670000;19.670000;18.980000;18.980000;18.980000;16.950000;16.780000;16.780000	0.005309;0.010789;0.010789;0.012647;0.012647;0.012647;0.020184;0.020989;0.000000	3.080000;0.000000;0.690000;0.000000;0.000000;2.030000;0.170000;0.000000;NA	0.015096100810;0.007427878433;0.007427878433;0.006336723938;0.006336723938;0.006336723938;0.003970679076;0.003818253753;0.003818253753	0.066061;0.032379;0.032379;0.027608;0.027608;0.027608;0.017279;0.016614;0.016614
query16230	843.09	2526.25	3	2526.22	0.032905	S	TDEAMNDYITKVKQLLEEAAASA	-	91	68	90	Oxidation (M)	[0000010000000000000000000]	26.85	1	0	Solyc08g075690.2.1	17.6	0.919282	10.9303	cyr_090307_meja_05_2_bi3_p.02245.02245.3_54.204mins	2526.281311[-0.032509];2526.153534[0.095268];2526.164764[0.084038];2526.291672[-0.042870];2526.157379[0.091423];2526.157379[0.091423];2526.309662[-0.060860];2526.302917[-0.054115];2526.215897[0.032905]	LANALDPGSTISLTVNDIVSSSAAPN/;CLLSFATEKDADCDRYKSLVGI/Phospho (ST)[000000000000000000200000];CIAEDIKSHAMTVGKYQIVNPN/Oxidation (M) Phospho (ST)[000000002001000000000000];SHKLSELIISDVKHLSNSLVPM/Phospho (ST)[000000000000000020000000];PASDSAAFLKIGGDGNLRIMDGNQ/Phospho (ST)[00000200000000000000000000];PASDSAAFLKIGGDGNLRIMDGNQ/Phospho (ST)[00020000000000000000000000];SFVTSAMSFILYGLTVLIGSVLI/Oxidation (M) P…	9.250000;8.510000;6.990000;6.090000;5.680000;5.680000;5.610000;5.580000;5.170000	0.118850;0.140929;0.199986;0.246037;0.270396;0.270396;0.274789;0.276694;0.000000	0.740000;1.520000;0.900000;0.410000;0.000000;0.070000;0.030000;0.410000;NA	0.015975294823;0.013472521390;0.009493992445;0.007717006780;0.007021806894;0.007021806894;0.006909535966;0.006861971055;0.006243798539	0.069940;0.058908;0.041429;0.033645;0.030603;0.030603;0.030112;0.029904;0.027201
query10101	936.964	1871.91	2	1871.96	-0.050182	K	RLATSGANFARAYTVQF	G	164	99	115			35.6	1	0	Solyc08g013670.2.1	17.45	0.908145	10.369	cyr_090307_meja_05_2_bi4_p.01688.01688.2_39.911mins	1871.901306[0.012730];1871.887741[0.026295];1871.950607[-0.036571];1871.887741[0.026295];1871.927124[-0.013088];1871.932846[-0.018810];1871.912857[0.001179];1871.883499[0.030537];1871.864105[0.049931]	SKLLHESEEYKSHTAN/;QLADTKAVSSKSTDTLGA/Phospho (ST)[00000000000002000000];FTISKLQGVIKRSDSN/Phospho (ST)[002000000000000000];QLADTKAVSSKSTDTLGA/Phospho (ST)[00000000000000020000];RLAVQLVTGGSGIQSVK/2 Phospho (ST)[0000000020020000000];FGLMPGTTAALRQSKKX/Phospho (ST)[0000000000000000020];SKLLDESESKVKSLTE/Phospho (ST)[000000000000000200];FTAEKLLVHTLAIGAE/2 Phospho (ST)[002000000020000000];MFFSSVVQKQYREK/…	18.150000;17.770000;17.410000;16.400000;16.060000;14.830000;14.400000;13.550000;13.500000	0.015311;0.016711;0.018155;0.022909;0.024774;0.032885;0.036308;0.044157;0.000000	0.380000;0.360000;1.010000;0.340000;1.230000;0.430000;0.850000;0.050000;NA	0.016336364830;0.014967712191;0.013777024277;0.010918310069;0.010096141384;0.007605984284;0.006888987928;0.005664419689;0.005599579613	0.071534;0.065495;0.060249;0.047678;0.044070;0.033159;0.030022;0.024670;0.024387
query7149	812.002	1621.99	2	1621.94	0.044164	D	PPLAVFQLDKVLVPS	Q	248	170	184			34.54	1	0	Solyc07g053540.1.1	17.41	0.953169	13.2947	cyr_090307_meja_05_2_bi4_p.02166.02166.2_52.355mins	1621.907944[0.080556];1621.905533[0.082967];1621.940262[0.048238];1621.922516[0.065984];1621.926361[0.062139];1621.999115[-0.010615];1621.899002[0.089498];1621.926376[0.062124];1621.915146[0.073354]	YTVKNFLDVIQGLI/;ASIEKIDLKKIVVS/Phospho (ST)[0000000000000020];AGNAPVDKLELKLALA/;QAIMTKKLGLVKYN/Oxidation (M)[0000100000000000];ILLSSKDLQRQGHK/;GRIIDLLKRGALNLA/;LTMAKKDIRGLLAI/Phospho (ST)[0020000000000000];QTRSGARIQLVPLPS/;RITGLTDIVLSHNAL/	17.130000;12.770000;10.450000;10.110000;9.880000;9.790000;9.790000;9.790000;9.790000	0.019364;0.052845;0.090157;0.097499;0.102802;0.104954;0.104954;0.104954;0.000000	4.360000;2.320000;0.340000;0.230000;0.090000;0.000000;0.000000;0.000000;NA	0.017304938910;0.006341179843;0.003716807514;0.003436925121;0.003259643242;0.003192787912;0.003192787912;0.003192787912;0.003192787912	0.075812;0.027627;0.016172;0.014952;0.014180;0.013888;0.013888;0.013888;0.013888
query2997	612.353	1222.69	2	1222.7	-0.008373	-	MKVIASYLLAV	L	114	1	11	Oxidation (M)	[0100000000000]	33.81	1	0	Solyc11g067100.1.1	17.2	0.934619	11.8455	cyr_090306_meja_005_bi6_2_p.01887.01887.2_45.220mins	1222.696136[-0.005000];1222.630585[0.060551];1222.655746[0.035390];1222.637970[0.053166];1222.618286[0.072850];1222.604126[0.087010];1222.595840[0.095296];1222.595810[0.095326];1222.643433[0.047703]	LFNIAYSLALV/;ETALHIAANVGQ/;VDSIHLADLGAL/;TLRMKYLPDA/Oxidation (M)[000010000000];RKIGRSELAN/Phospho (ST)[000000200000];TSSXALSVTGTSN/;GLVDSINKLAN/Phospho (ST)[0000020000000];KLELAASNLAN/Phospho (ST)[0000000200000];KNKQKSLLAN/Phospho (ST)[000000200000]	16.610000;13.480000;13.480000;11.700000;11.650000;11.330000;10.890000;10.520000;10.520000	0.021827;0.044875;0.044875;0.067608;0.068391;0.073621;0.081470;0.088716;0.000000	3.130000;0.000000;1.780000;0.050000;0.320000;0.440000;0.370000;0.000000;NA	0.017808792898;0.008662325190;0.008662325190;0.005749558319;0.005683743669;0.005280006819;0.004771275384;0.004381617712;0.004381617712	0.078040;0.037784;0.037784;0.025042;0.024755;0.022992;0.020771;0.019071;0.019071
query12086	1031.43	2060.84	2	2060.82	0.021703	K	FQSEEQQQTEDELQDK	I	222	48	63	Phospho (ST)	[000200000000000000]	31.23	1	0	caseinbeta	17.05	0.905465	10.2441	cyr_090307_meja_05_2_bi4_p.01320.01320.2_30.313mins	2060.924011[-0.081141];2060.924011[-0.081141];2060.812927[0.029943];2060.859100[-0.016230];2060.906723[-0.063853];2060.931183[-0.088313];2060.898651[-0.055781];2060.916595[-0.073725];2060.883575[-0.040705]	YTFLICSTDLVMSFNVI/Oxidation (M) Phospho (ST)[0000000020001000000];YTFLICSTDLVMSFNVI/Oxidation (M) Phospho (ST)[0000000200001000000];PSEPKSFNPAEGSVGEVGN/2 Phospho (ST)[002000000000020000000];SDMHTIGAKMSRMSRGSN/Oxidation (M) Phospho (ST)[02000000000001000000];PSNTTIHYTLLSCTXFF/Phospho (ST)[0020000000000000000];GVFLVCNNAQLLMEASEK/Oxidation (M) Phospho (ST)[00000000000001002000];SPDRMKSALPENHDVGVN/Ox…	14.180000;14.180000;11.500000;11.400000;10.820000;10.810000;10.710000;10.490000;10.490000	0.038194;0.038194;0.070795;0.072444;0.082794;0.082985;0.084918;0.089331;0.000000	0.000000;2.680000;0.100000;0.580000;0.010000;0.100000;0.220000;0.000000;NA	0.017859601395;0.017859601395;0.009635444666;0.009416115169;0.008238947998;0.008219998944;0.008032888924;0.007636102718;0.007636102718	0.078264;0.078264;0.042049;0.041087;0.035930;0.035847;0.035027;0.033290;0.033290
query10931	974.077	1946.14	2	1946.07	0.07317	K	VQLILNHVIPKFYTFD	D	248	104	119			36.7	1	0	Solyc07g053540.1.1	16.99	0.894785	9.77922	cyr_090307_meja_05_2_bi3_p.02056.02056.2_49.277mins	1946.094910[0.044834];1946.054672[0.085072];1946.125732[0.014012];1946.167862[-0.028118];1946.062515[0.077229];1946.080963[0.058781];1946.054672[0.085072];1946.041412[0.098332];1946.055298[0.084446]	INLVQHLLVTLQRGDVE/;LNILLTKSFDIGPTNMLG/;QVLLVSIPVVYVAILLQ/Phospho (ST)[0000002000000000000];AGVILALFVCLLVVYIIQ/;KVLLYERQLSIEWNVG/;INILAHRDATQRGLIQQ/;VKILVGSSVLEETMQWK/;KVKIDSFVLHNLYWGQ/;INILSALFYKYVFEXN/	19.710000;19.710000;18.800000;18.260000;17.210000;16.520000;16.520000;16.240000;15.520000	0.010691;0.010691;0.013183;0.014928;0.019011;0.022284;0.022284;0.023768;0.000000	0.000000;0.910000;0.540000;1.050000;0.690000;0.000000;0.280000;0.720000;NA	0.017894461800;0.017894461800;0.014511711671;0.012815000897;0.010062795362;0.008584571871;0.008584571871;0.008048568432;0.006818967820	0.078418;0.078418;0.063485;0.056015;0.043924;0.037443;0.037443;0.035096;0.029716
query14598	1168.06	2334.11	2	2334.08	0.028158	L	VGDYGFDPFGLGKPAEYLQFD	L	286	67	87			29.43	1	0	Solyc09g014520.2.1	16.69	0.9419	12.3582	cyr_090307_meja_05_2_bi3_p.02227.02227.2_53.747mins	2334.200165[-0.087519];2334.109390[0.003256];2334.065781[0.046865];2334.065781[0.046865];2334.152176[-0.039530];2334.100937[0.011709];2334.100937[0.011709];2334.100937[0.011709];2334.100937[0.011709]	DRDVNMVSINAGLLIHPDLNI/Oxidation (M)[00000010000000000000000];QRGTSTNARPGTIKKSTTTGI/2 Phospho (ST)[00000000000020002000000];FAGDIQGGLGLRAEVLSSNIAS/2 Phospho (ST)[000000000000000000200020];FAGDIQGGLGLRAEVLSSNIAS/2 Phospho (ST)[000000000000000002000020];DHRTYVDLKDKWKTLVHT/Phospho (ST)[00002000000000000000];HLRLMMLMSFMVVGLGSIAT/3 Oxidation (M) Phospho (ST)[0000001012010000000000];HLRLMMLMSFMVVGLGSIAT…	12.740000;7.510000;6.510000;6.510000;6.340000;6.130000;6.130000;6.130000;6.130000	0.053211;0.177419;0.223357;0.223357;0.232274;0.243781;0.243781;0.243781;0.000000	5.230000;1.000000;0.000000;0.170000;0.210000;0.000000;0.000000;0.000000;NA	0.020183876362;0.006053472547;0.004808444162;0.004808444162;0.004623858947;0.004405595067;0.004405595067;0.004405595067;0.004405595067	0.088554;0.026370;0.020933;0.020933;0.020128;0.019176;0.019176;0.019176;0.019176
query13322	1088.14	2174.26	2	2174.18	0.084234	K	VQLILNHVIPKFYTFDDL	Q	248	104	121			38.58	1	0	Solyc07g053540.1.1	16.64	0.93236	11.698	cyr_090306_meja_005_bi6_2_p.02119.02119.2_51.343mins	2174.246323[0.015493];2174.200989[0.060827];2174.202057[0.059759];2174.188766[0.073050];2174.212234[0.049582];2174.293884[-0.032068];2174.199570[0.062246];2174.267395[-0.005579];2174.256821[0.004995]	KFLQAQSKVDVLAGIGFAAVL/;ENPTKKCKLKLSVQIRXI/Phospho (ST)[00000000000020000000];INLTMTLSAVTLNISLLATW/;ILNYWNLLQADKSKLWIG/;RAIAGVLLLAGKKGMRTDPK/Phospho (ST)[0000000000000000020000];RAIINSYKYTLIQIRIPL/;WIKALTWVMIQVLMAGLVA/2 Oxidation (M)[000000000100001000000];YKKAAKKVILIDELTKGQE/;ARAKREKLKMEKILKSTE/Oxidation (M)[00000000001000000000]	21.940000;19.030000;17.990000;16.310000;15.620000;15.620000;15.620000;15.620000;15.470000	0.006397;0.012503;0.015885;0.023388;0.027416;0.027416;0.027416;0.027416;0.000000	2.910000;1.040000;1.680000;0.690000;0.000000;0.000000;0.000000;0.150000;NA	0.020210802574;0.010341500559;0.008139234474;0.005528197621;0.004716106021;0.004716106021;0.004716106021;0.004716106021;0.004555998367	0.088674;0.045146;0.035493;0.024075;0.020530;0.020530;0.020530;0.020530;0.019832
query4502	676.361	1350.71	2	1350.7	0.004171	D	LLNAAGETYSVTL	S	171	133	145			35.59	1	0	Solyc04g082010.1.1	16.37	0.935635	11.9135	cyr_090307_meja_05_2_bi3_p.01840.01840.2_43.660mins	1350.654434[0.052816];1350.633316[0.073934];1350.639053[0.068197];1350.619675[0.087575];1350.654434[0.052816];1350.619659[0.087591];1350.703110[0.004140];1350.665848[0.041402];1350.636673[0.070577]	RLTLTADAASVGP/Phospho (ST)[000000000020000];AHFKTVSSQPGL/Phospho (ST)[00000000200000];RDYTMWHLLT/Oxidation (M)[000001000000];KEKTSLSGKTL/2 Phospho (ST)[0000020200000];PQTPASTSLRTL/Phospho (ST)[00000000200000];SAKKSKSELTL/2 Phospho (ST)[0200000200000];TIDVNGVLGYSTI/;WTSLMIPPITI/Phospho (ST)[0020000000000];SVLDSMRLXLH/Phospho (ST)[0200000000000]	19.220000;15.540000;14.500000;13.740000;12.350000;12.280000;12.060000;11.450000;11.420000	0.011967;0.027925;0.035481;0.042267;0.058210;0.059156;0.062230;0.071614;0.000000	3.680000;1.040000;0.760000;1.390000;0.070000;0.220000;0.610000;0.030000;NA	0.021582735007;0.009249249153;0.007279582604;0.006110918315;0.004437174194;0.004366228685;0.004150557918;0.003606670590;0.003581842444	0.094759;0.040356;0.031730;0.026621;0.019313;0.019004;0.018063;0.015692;0.015584
query15492	815.128	2442.36	3	2442.31	0.051033	Q	IPLTGPNSVVGRALVVHELEDDL	G	218	167	189			24.02	1	0	Solyc11g066390.1.1	16.36	0.867203	8.76813	cyr_090307_meja_05_2_bi4_p.02018.02018.3_48.510mins	2442.365753[-0.002876];2442.272308[0.090569];2442.340363[0.022514];2442.279602[0.083275];2442.299759[0.063118];2442.299759[0.063118];2442.299759[0.063118];2442.273911[0.088966];2442.277100[0.085777]	LPLSIRKNPEKARGIRITIGM/Phospho (ST)[00002000000000000000000];PIITPCTRDGINKVTLTGCDARV/;PIITSVGGSIEIVGKLVXLAMNSGA/Oxidation (M)[000000000000000000000100000];LPLTIMVVNIMALVIGISRTI/Oxidation (M) 2 Phospho (ST)[00000000000100000020200];PLGPIPAVHSLSMVLISLTIFTG/Phospho (ST)[0000000000000000000200000];PLGPIPAVHSLSMVLISLTIFTG/Phospho (ST)[0000000000000000020000000];PLGPIPAVHSLSMVLISLTIFTG/Phospho (ST)[0000…	7.660000;7.090000;6.920000;6.760000;5.940000;5.940000;5.940000;5.270000;4.600000	0.171396;0.195434;0.203236;0.210863;0.254683;0.254683;0.254683;0.297167;0.000000	0.570000;0.170000;0.160000;0.820000;0.000000;0.000000;0.670000;0.670000;NA	0.020050303678;0.017584132790;0.016909117996;0.016297498688;0.013493386327;0.013493386327;0.013493386327;0.011564342743;0.009911079386	0.087962;0.077046;0.074063;0.071362;0.059000;0.059000;0.059000;0.050516;0.043258
query10766	967.521	1933.03	2	1932.98	0.044499	A	LEVLLGGDDGSLAFIPGNF	S	171	72	90			38.87	1	0	Solyc04g082010.1.1	16.33	0.954279	13.3988	cyr_090307_meja_05_2_bi3_p.02348.02348.2_56.912mins	1932.963165[0.064641];1933.078705[-0.050899];1932.991318[0.036488];1933.009781[0.018025];1933.070663[-0.042857];1932.958115[0.069691];1932.955734[0.072072];1932.931427[0.096379];1932.962830[0.064976]	ASVGHMVGIEILVETLLG/Oxidation (M) Phospho (ST)[00200010000000000000];SKAFLFLGIFLAIFSMI/Oxidation (M)[0000000000000000100];YAAKMLHDAMLNSILRA/Oxidation (M)[0000000000100000000];QASFFLLNFQGLLHEGL/;VGMSQIAKAFAIATALVLGG/Oxidation (M)[0001000000000000000000];AFQSLKHEDAENIGYVI/;SQKLLDLNPNPSLSSLQ/Phospho (ST)[0200000000000000000];LYXISYIIFALFTNE/Phospho (ST)[00000200000000000];LANLRTPGNFLRMDWN/Oxidation (…	22.540000;15.260000;14.760000;14.080000;13.790000;13.220000;12.880000;12.870000;12.330000	0.005572;0.029785;0.033420;0.039084;0.041783;0.047643;0.051523;0.051642;0.000000	7.280000;0.500000;0.680000;0.290000;0.570000;0.340000;0.010000;0.540000;NA	0.022216487339;0.004155998609;0.003704037659;0.003167199305;0.002962616201;0.002598216841;0.002402566369;0.002397040619;0.002116778391	0.097573;0.018087;0.016116;0.013777;0.012886;0.011299;0.010447;0.010423;0.009203
query6718	795.431	1588.85	2	1588.75	0.093083	I	SPSITYRFDPLLT	L	346	115	127	Phospho (ST)	[020000000000000]	35.37	1	0	Solyc05g009000.2.1	16.32	0.894663	9.77419	cyr_090307_meja_05_2_bi4_p.02019.02019.2_48.531mins	1588.753815[0.093083];1588.779663[0.067235];1588.762634[0.084264];1588.835709[0.011189];1588.893692[-0.046794];1588.797592[0.049306];1588.762634[0.084264];1588.893646[-0.046748];1588.809494[0.037404]	SPSITYRFDPLLT/Phospho (ST)[000200000000000];QVVAGKVHVMQLSN/Phospho (ST)[0000000000000200];LRGLSSELLSKIN/2 Phospho (ST)[000002200000000];TFPPPVLMLLMGKN/2 Oxidation (M)[0000000010010000];LGRDVTGFGILKSLN/;YTPVISFKPMLLT/Phospho (ST)[002000000000000];LRGLSSELLSKIN/2 Phospho (ST)[000000200020000];NAQKIGKYINNLTI/;KSFIFFFKISFX/Phospho (ST)[00200000000000]	19.050000;17.940000;17.640000;16.840000;16.640000;14.790000;14.530000;14.200000;14.070000	0.012445;0.016069;0.017219;0.020701;0.021677;0.033189;0.035237;0.038019;0.000000	1.110000;0.300000;0.800000;0.200000;1.850000;0.260000;0.330000;0.130000;NA	0.020876583475;0.016168116370;0.015088964138;0.012550453714;0.011985590248;0.007828155182;0.007373257926;0.006833755342;0.006632227673	0.091626;0.070791;0.066030;0.054851;0.052367;0.034131;0.032140;0.029780;0.028899
query844	460.742	919.47	2	919.48	-0.009715	A	GMVGKVTVN	-	171	162	170	Oxidation (M)	[00100000000]	33.51	1	0	Solyc04g082010.1.1	16.21	0.893944	9.74463	cyr_090307_meja_05_2_bi5_p.01085.01085.2_23.978mins	919.440002[0.030004];919.392929[0.077077];919.458572[0.011434];919.392929[0.077077];919.440811[0.029195];919.490921[-0.020915];919.392929[0.077077];919.454529[0.015477];919.506180[-0.036174]	GFVGGGVDVGG/;KRISGXV/2 Phospho (ST)[000020200];KXLQSGVW/;KRVTGLS/2 Phospho (ST)[000020020];KKCPCGVW/;KRSLGMXN/Oxidation (M)[0000001000];KRVTASV/2 Phospho (ST)[000020200];SLCASARXN/;KRMGKVW/Oxidation (M)[000100000]	17.300000;16.460000;16.060000;14.910000;13.930000;13.910000;12.740000;12.050000;11.060000	0.018621;0.022594;0.024774;0.032285;0.040458;0.040644;0.053211;0.062373;0.000000	0.840000;0.400000;1.150000;0.980000;0.020000;1.170000;0.690000;0.990000;NA	0.021394891260;0.017632345354;0.016080890086;0.012339855767;0.009847139343;0.009801895848;0.007487038796;0.006387193650;0.005085223947	0.093925;0.077259;0.070406;0.053925;0.042978;0.042779;0.032638;0.027828;0.022141

## Sheet: CS_unique peptides_108
Table S-4, (Peptides Identified by CS)
Query Number	Observed m/z	Observed MW	Observed Charge State	Theoretical MW	MW Error	Residue Before	Seq	Residue After	Protein Length	From	to	Modification	Mod Location	Mascot Score	Unique	Missed Cleavage	Accession	DS	Contribution Fraction C1	CS	Title	Subranked Theoretical MW[Error]	Subranked Seq/Mod[Loc]	Subranked Mascot Scores	Subranked Random Matched Probabilities	Subranked MDScores	Subranked Contibution Fractions	Subranked Contribution Scores
query6876	802.47	1602.93	2	1602.93	-0.009241	M	VLGLGTGSTAAFVVAKL	G	294	82	98			125.72	1	0	Solyc01g097460.2.1	106.06	1	99.3468	cyr_090307_meja_05_2_bi3_p.02062.02062.2_49.447mins	1602.838196[0.087072];1602.920578[0.004690];1602.838196[0.087072];1602.838196[0.087072];1602.825333[0.099935];1602.872955[0.052313];1602.872955[0.052313];1602.898087[0.027181];1602.925278[-0.000010]	VLGLITIESKSLHN/Phospho (ST)[0000002000000000];VLGAVARDIIVNGIGH/;VLGLITIESKSLHN/Phospho (ST)[0000000002000000];VLGLITIESKSLHN/Phospho (ST)[0000000000020000];PDVASQPSPATLLNPP/;PKTITGSGDAPRXPPP/;PKTITGSGDAPRXPPP/;IVGLGYSNISIINQL/;LVRAFRQMGVVRR/Oxidation (M)[000000001000000]	19.660000;18.590000;17.660000;16.570000;15.540000;15.310000;15.310000;15.190000;14.560000	0.010814;0.013836;0.017140;0.022029;0.027925;0.029444;0.029444;0.030269;0.000000	1.070000;0.930000;1.090000;1.030000;0.230000;0.000000;0.120000;0.630000;NA	0.000000000025;0.000000000019;0.000000000016;0.000000000012;0.000000000010;0.000000000009;0.000000000009;0.000000000009;0.000000000008	0.000000;0.000000;0.000000;0.000000;0.000000;0.000000;0.000000;0.000000;0.000000
query8278	856.968	1711.92	2	1711.94	-0.014109	D	INSPISGEIVEVNTKL	S	162	99	114			131.56	1	0	Solyc08g007040.2.1	104.53	1	98.2699	cyr_090307_meja_05_2_bi4_p.01798.01798.2_42.788mins	1711.916779[0.004705];1711.899216[0.022268];1711.886154[0.035330];1711.890976[0.030508];1711.966095[-0.044611];1711.822220[0.099264];1711.827271[0.094213];1711.899185[0.022299];1711.846710[0.074774]	QVSNKVMKSRSIKK/Phospho (ST)[0000000002000000];QVSVVRELEIESLPD/;ARSKEMKRGGSMFLV/Oxidation (M)[00000000000010000];QVSVFKILLDRDLS/Phospho (ST)[0000000000000020];NLSLPLEGWFKLPKA/;GADAIINFIETPFPK/Phospho (ST)[00000000000200000];YSPAMALNMNEKSKI/Oxidation (M)[00000000010000000];SINPIEKELDELQGK/;KVKAMELIDQLEVT/Oxidation (M) Phospho (ST)[0000010000000020]	27.030000;26.750000;24.930000;24.440000;22.070000;20.760000;20.350000;19.950000;18.960000	0.001982;0.002113;0.003214;0.003597;0.006209;0.008395;0.009226;0.010116;0.000000	0.280000;1.820000;0.490000;2.370000;1.310000;0.410000;0.400000;0.990000;NA	0.000000000035;0.000000000033;0.000000000022;0.000000000019;0.000000000011;0.000000000008;0.000000000008;0.000000000007;0.000000000005	0.000000;0.000000;0.000000;0.000000;0.000000;0.000000;0.000000;0.000000;0.000000
query16738	1296.64	2591.26	2	2591.31	-0.050823	A	LEVLLGGDDGSLAFIPGNFSVSAGEK	I	171	72	97			120.16	1	0	Solyc04g082010.1.1	102.1	1	95.655	cyr_090307_meja_05_2_bi3_p.02153.02153.2_51.815mins	2591.272263[-0.011181];2591.338364[-0.077282];2591.322296[-0.061214];2591.322296[-0.061214];2591.286560[-0.025478];2591.301239[-0.040157];2591.301239[-0.040157];2591.301239[-0.040157];2591.301239[-0.040157]	SASQVMAVLQLPFAVASIILTEK/Oxidation (M) 2 Phospho (ST)[0202001000000000000000000];NLNNSVYTWLFKLSNLTHLDLS/;QVFGMSLVTLIFALVGFLSPSNR/Oxidation (M) Phospho (ST)[0000010000000000000002000];QVFGMSLVTLIFALVGFLSPSNR/Oxidation (M) Phospho (ST)[0000010000000000000200000];VATMSGLHLCRAGVSSRLFELHK/Phospho (ST)[0000000000000000200000000];QALKVSSSPPTLIATLKELLDHA/2 Phospho (ST)[0000000000020002000000000];QALKVSSSP…	18.060000;15.870000;14.280000;14.280000;14.180000;14.060000;13.940000;13.940000;13.940000	0.015631;0.025882;0.037325;0.037325;0.038194;0.039264;0.040365;0.040365;0.000000	2.190000;1.590000;0.000000;0.100000;0.120000;0.120000;0.000000;0.000000;NA	0.000000000062;0.000000000037;0.000000000026;0.000000000026;0.000000000025;0.000000000025;0.000000000024;0.000000000024;0.000000000024	0.000000;0.000000;0.000000;0.000000;0.000000;0.000000;0.000000;0.000000;0.000000
query5776	745.94	1489.86	2	1489.85	0.014027	M	VLGLGTGSTAAFVVAK	L	294	82	97			98.86	1	0	Solyc01g097460.2.1	72.75	1	71.41	cyr_090307_meja_05_2_bi5_p.01782.01782.2_42.234mins	1489.788895[0.075581];1489.927216[-0.062740];1489.814026[0.050450];1489.902100[-0.037624];1489.794571[0.069905];1489.898026[-0.033550];1489.797913[0.066563];1489.934402[-0.069926];1489.871552[-0.007076]	PKTITGSGDAPRXPP/;VIGLSFLAFLLVAK/;IVGLGYSNISIINQ/;VIGIGGFGKVFKGVL/;VIGLLXFPGIVAPT/Phospho (ST)[0000000000000020];LAGLNKKVHEIGIV/;IGLGSLIIMPLLGN/Phospho (ST)[0000020000000000];LRLLLSSKGKFKT/;LGVIKSSLGISKTST/	26.110000;14.830000;13.780000;13.070000;12.360000;12.130000;11.410000;11.230000;10.920000	0.002449;0.032885;0.041879;0.049317;0.058076;0.061235;0.072277;0.075336;0.000000	11.280000;1.050000;0.710000;0.710000;0.230000;0.720000;0.180000;0.310000;NA	0.000000053088;0.000000003954;0.000000003105;0.000000002636;0.000000002239;0.000000002123;0.000000001799;0.000000001726;0.000000001607	0.000000;0.000000;0.000000;0.000000;0.000000;0.000000;0.000000;0.000000;0.000000
query6812	800.439	1598.86	2	1598.85	0.012334	D	INSPISGEIVEVNTK	L	162	99	113			106.71	1	0	Solyc08g007040.2.1	75.12	1	70.5099	cyr_090307_meja_05_2_bi4_p.01600.01600.2_37.628mins	1598.843277[0.020589];1598.837601[0.026265];1598.843277[0.020589];1598.885239[-0.021373];1598.780411[0.083455];1598.822556[0.041310];1598.895325[-0.031459];1598.829346[0.034520];1598.899124[-0.035258]	VQSPLSKKSFKISA/Phospho (ST)[0000000002000000];NISPLTGSNGEIRKN/;VQSPLSKKSFKISA/Phospho (ST)[0000000000000200];VQSPLSTQATAGKRR/;LNSSLSLSGTDLSLL/Phospho (ST)[00000000000002000];VVQKSSMLYSLDTL/Oxidation (M)[0000000100000000];QVSPLVTLGLLESLM/;RASSILQRFSKLN/Phospho (ST)[000020000000000];NLISPSKANITSLKN/	31.590000;27.780000;27.580000;27.580000;25.150000;23.060000;22.280000;21.600000;21.400000	0.000693;0.001667;0.001746;0.001746;0.003055;0.004943;0.005916;0.006918;0.000000	3.810000;0.200000;0.000000;2.430000;2.090000;0.780000;0.680000;0.200000;NA	0.000000030761;0.000000012794;0.000000012218;0.000000012218;0.000000006982;0.000000004315;0.000000003606;0.000000003083;0.000000002944	0.000000;0.000000;0.000000;0.000000;0.000000;0.000000;0.000000;0.000000;0.000000
query17240	887.462	2659.36	3	2659.28	0.087013	R	FNKVNYANVSTNNYALDEVEEVK	-	141	118	140			91.04	1	0	Solyc09g063130.2.1	74.01	1	66.689	cyr_090307_meja_05_2_bi3_p.01650.01650.3_38.703mins	2659.286911[0.076637];2659.286942[0.076606];2659.271667[0.091881];2659.271667[0.091881];2659.271667[0.091881];2659.355515[0.008033];2659.355515[0.008033];2659.317932[0.045616];2659.417877[-0.054329]	KSYKDIVGSAYYVAPEVLRRCY/Phospho (ST)[002000000000000000000000];KYNTNGNLLPPNFINVVGCLYGIG/Phospho (ST)[00002000000000000000000000];KVMGTNSELAYDSNPLIWVSRIS/Phospho (ST)[0000000000000000000000020];KVMGTNSELAYDSNPLIWVSRIS/Phospho (ST)[0000000000000000000020000];KVMGTNSELAYDSNPLIWVSRIS/Phospho (ST)[0000000000000200000000000];VSTKKLNVVGFRGRSSSSSNNTRV/Phospho (ST)[00020000000000000000000000];VSTKKLNVVGFRG…	17.030000;15.950000;15.510000;15.510000;15.510000;12.950000;12.950000;12.920000;12.250000	0.019815;0.025410;0.028119;0.028119;0.028119;0.050699;0.050699;0.051050;0.000000	1.080000;0.440000;0.000000;0.000000;2.560000;0.000000;0.030000;0.670000;NA	0.000000039719;0.000000030974;0.000000027990;0.000000027990;0.000000027990;0.000000015524;0.000000015524;0.000000015417;0.000000013213	0.000000;0.000000;0.000000;0.000000;0.000000;0.000000;0.000000;0.000000;0.000000
query15759	824.449	2470.33	3	2470.31	0.011849	K	AVEYVKSGMVLGLGTGSTAAFVVAK	L	294	73	97	Oxidation (M)	[000000000100000000000000000]	79.66	1	0	Solyc01g097460.2.1	72.26	1	64.4987	cyr_090307_meja_05_2_bi3_p.01765.01765.3_41.708mins	2470.248383[0.077629];2470.248383[0.077629];2470.270981[0.055031];2470.283279[0.042733];2470.333450[-0.007438];2470.302505[0.023507];2470.240555[0.085457];2470.270981[0.055031];2470.294434[0.031578]	SIASAWLTLAVGLKAFSHCGFLV/Phospho (ST)[0000200000000000000000000];SIASAWLTLAVGLKAFSHCGFLV/Phospho (ST)[0200000000000000000000000];QVVLVSQSGTVNRIKVRDISI/2 Phospho (ST)[00000000200000000000200];STKGVITDVVVALDGTGNFTRIK/Phospho (ST)[0000000200000000000000000];LINVQIPFTPMVYPAGPVVFATP/;KLYVVTNYLTKPHYLTKPVN/Phospho (ST)[0000000000200000000000];VKSTCLMVSVLSFTLLHGPPFV/Oxidation (M) Phospho (ST)[000000010200…	7.400000;7.400000;6.760000;5.630000;5.100000;4.530000;4.290000;4.020000;3.320000	0.181970;0.181970;0.210863;0.273527;0.309030;0.352371;0.372392;0.396278;0.000000	0.000000;0.640000;1.130000;0.530000;0.570000;0.240000;0.270000;0.700000;NA	0.000000059429;0.000000059429;0.000000051286;0.000000039537;0.000000034995;0.000000030690;0.000000029040;0.000000027290;0.000000023227	0.000000;0.000000;0.000000;0.000000;0.000000;0.000000;0.000000;0.000000;0.000000
query13107	1079.01	2156	2	2156	-0.000345	F	NKVNYANVSTNNYALDEVE	E	141	119	137			86.34	1	0	Solyc09g063130.2.1	67.76	0.999999	59.6842	cyr_090307_meja_05_2_bi3_p.01559.01559.2_36.335mins	2155.928970[0.072836];2155.928970[0.072836];2156.074966[-0.073160];2156.030319[-0.028513];2156.058823[-0.057017];2156.058823[-0.057017];2156.058823[-0.057017];2155.940170[0.061636];2156.015732[-0.013926]	MIFMGFMVMVPSKMAVPE/2 Oxidation (M) Phospho (ST)[00000000010020100000];MIFMGFMVMVPSKMAVPE/2 Oxidation (M) Phospho (ST)[00000001000020100000];FPSPSSSSITLTNVLNADAVH/;LYVDLATHFRGEIVNSDK/Phospho (ST)[00000002000000000000];EATLTSRLSSKDLAFIPMP/Phospho (ST)[000000200000000000000];EATLTSRLSSKDLAFIPMP/Phospho (ST)[000002000000000000000];EATLTSRLSSKDLAFIPMP/Phospho (ST)[000200000000000000000];TTANCQEFLMDVNA…	18.580000;18.580000;17.750000;16.990000;16.380000;16.380000;16.380000;16.120000;15.790000	0.013868;0.013868;0.016788;0.019999;0.023014;0.023014;0.023014;0.024434;0.000000	0.000000;0.830000;0.760000;0.610000;0.000000;0.000000;0.260000;0.330000;NA	0.000000167494;0.000000167494;0.000000138356;0.000000116145;0.000000100925;0.000000100925;0.000000100925;0.000000095060;0.000000088105	0.000001;0.000001;0.000001;0.000001;0.000000;0.000000;0.000000;0.000000;0.000000
query6336	779.894	1557.77	2	1557.79	-0.016932	L	IMVTSTSLMLFAGR	F	131	56	69	2 Oxidation (M)	[0010000001000000]	90.48	1	0	Solyc08g006930.2.1	63.27	0.999999	58.9029	cyr_090307_meja_05_2_bi3_p.01812.01812.2_42.927mins	1557.768341[0.004217];1557.791565[-0.019007];1557.807220[-0.034662];1557.774902[-0.002344];1557.786102[-0.013544];1557.818436[-0.045878];1557.780396[-0.007838];1557.780396[-0.007838];1557.807907[-0.035349]	FIVMNDEFLMRK/Oxidation (M)[00000000001000];LLYKKNSNGTVKN/Phospho (ST)[000000020000000];LMAELLVQIDGLNN/Oxidation (M)[0010000000000000];IFVTFAGMKVSDVE/Oxidation (M)[0000000010000000];MLSLSHHYTIVEL/Oxidation (M)[010000000000000];IMAEVLVANKNLNN/Oxidation (M)[0010000000000000];SLVVSFGASVATVGGK/Phospho (ST)[000002000000000000];SLVVSFGASVATVGGK/Phospho (ST)[020000000000000000];LFVTSPFGSFSEKI/	27.210000;23.610000;21.660000;20.800000;19.930000;19.490000;18.840000;18.840000;18.750000	0.001901;0.004355;0.006823;0.008318;0.010162;0.011246;0.013062;0.013062;0.000000	3.600000;1.950000;0.860000;0.870000;0.440000;0.650000;0.000000;0.090000;NA	0.000000470977;0.000000205589;0.000000131220;0.000000107646;0.000000088105;0.000000079616;0.000000068549;0.000000068549;0.000000067143	0.000002;0.000001;0.000001;0.000000;0.000000;0.000000;0.000000;0.000000;0.000000
query16023	1251.64	2501.27	2	2501.24	0.027623	F;F	ASGSDENDVVVIGGGPGGYVAAIKAAQ	L;L	501	31	57			83.05	0	0	Solyc05g053300.2.1;Solyc12g099100.1.1	61.46	0.999998	57.1043	cyr_090307_meja_05_2_bi3_p.01806.01806.2_42.779mins	2501.292023[-0.024593];2501.350479[-0.083049];2501.291397[-0.023967];2501.284424[-0.016994];2501.258972[0.008458];2501.333664[-0.066234];2501.267471[-0.000041];2501.267471[-0.000041];2501.212082[0.055348]	QLYALTVGRSARLVATALRPVS/2 Phospho (ST)[000000000000000020000020];KLNYLRFKGVPLVGFVMVEYGG/Oxidation (M)[000000000000000001000000];QLFESNRANKXLSEYTSVFLQ/;KMSLTLFMKYGLVMNVNPRDL/2 Oxidation (M)[00000000100000100000000];KLIKKTKEHSRVMKEQKSQ/Oxidation (M) 2 Phospho (ST)[000000200000010000200];SRDQLGETSVIKTLASEIQVAEK/;MTSIAMKVVLDVIREQFTLVP/2 Oxidation (M) Phospho (ST)[01020010000000000000000];MTSIAMKVVLDVI…	21.590000;17.020000;16.460000;16.160000;14.090000;13.920000;13.370000;13.370000;12.850000	0.006934;0.019861;0.022594;0.024210;0.038994;0.040551;0.046026;0.046026;0.000000	4.570000;0.560000;0.300000;2.070000;0.170000;0.550000;0.000000;0.520000;NA	0.000000714495;0.000000249459;0.000000219280;0.000000204644;0.000000127057;0.000000122180;0.000000107646;0.000000107646;0.000000095499	0.000003;0.000001;0.000001;0.000001;0.000001;0.000001;0.000000;0.000000;0.000000
query7332	818.892	1635.77	2	1635.8	-0.028926	M	EGVESFDIDIKEQK	V	114	28	41			84.9	1	0	Solyc11g007200.1.1	64.67	0.999998	56.9723	cyr_090307_meja_05_2_bi3_p.01561.01561.2_36.377mins	1635.772202[-0.001964];1635.805511[-0.035273];1635.805511[-0.035273];1635.805511[-0.035273];1635.859634[-0.089396];1635.859634[-0.089396];1635.824310[-0.054072];1635.748856[0.021382];1635.848434[-0.078196]	WPFTLDEFVQAFH/;KFKKIMQKSTSNT/Oxidation (M) Phospho (ST)[000000100000020];KFKKIMQKSTSNT/Oxidation (M) Phospho (ST)[000000100002000];KFKKIMQKSTSNT/Oxidation (M) Phospho (ST)[000000100020000];KKEKTPKSKSPVEA/Phospho (ST)[0000000020000000];KKEKTPKSKSPVEA/Phospho (ST)[0000020000000000];TIAESFEIISLIADD/;AGQEYEDQAAQRAXV/;KSGIKSTDVILEIGP/Phospho (ST)[00000002000000000]	20.230000;19.090000;19.090000;19.090000;17.780000;17.780000;17.230000;17.060000;16.830000	0.009484;0.012331;0.012331;0.012331;0.016672;0.016672;0.018923;0.019679;0.000000	1.140000;0.000000;0.000000;1.310000;0.000000;0.550000;0.170000;0.230000;NA	0.000000341192;0.000000262421;0.000000262421;0.000000262421;0.000000194088;0.000000194088;0.000000171001;0.000000164437;0.000000155955	0.000001;0.000001;0.000001;0.000001;0.000001;0.000001;0.000001;0.000001;0.000001
query10442	952.045	1902.08	2	1902.08	-0.006602	M	VLGLGTGSTAAFVVAKLGEL	L	294	82	101			75.72	1	0	Solyc01g097460.2.1	59.18	0.999995	52.6808	cyr_090307_meja_05_2_bi3_p.02287.02287.2_55.319mins	1902.047882[0.028142];1902.028442[0.047582];1902.021042[0.054982];1901.986343[0.089681];1902.070328[0.005696];1901.987183[0.088841];1902.106720[-0.030696];1902.008804[0.067220];1902.017899[0.058125]	LAVIGVTELVVGLLLEGQ/Phospho (ST)[00000002000000000000];ALDKAVVAAAEIMTLKXG/Oxidation (M)[00000000000001000000];DPGAAGYTIKEAVALARSL/;IGGAELGAGVAPTAVGAILVS/Phospho (ST)[00000000000002000000000];IGIVGLGSIGLKVAQRLE/Phospho (ST)[00000000200000000000];KVISMLRMDKLPKTF/Oxidation (M) Phospho (ST)[00000000100000200];KVVLVLSGVAGLGSLARAL/Phospho (ST)[000000020000000000000];KKVGKVTSFTTGKRASQ/Phospho (ST)[000000…	16.540000;14.900000;14.350000;13.900000;13.010000;12.810000;11.520000;10.830000;9.130000	0.022182;0.032359;0.036728;0.040738;0.050003;0.052360;0.070469;0.082604;0.000000	1.640000;0.550000;0.450000;0.890000;0.200000;1.290000;0.690000;1.700000;NA	0.000001207807;0.000000827938;0.000000729454;0.000000657654;0.000000535794;0.000000511679;0.000000380187;0.000000324338;0.000000219279	0.000005;0.000004;0.000003;0.000003;0.000002;0.000002;0.000002;0.000001;0.000001
query3814	644.384	1286.75	2	1286.73	0.018849	L;L	LSIAVGLPNIGPH	F;F	839	540	552			83	0	0	Solyc03g121540.2.1;Solyc06g062580.2.1	57.22	0.999994	52.3457	cyr_090307_meja_05_2_bi3_p.01886.01886.2_44.850mins	1286.712875[0.040639];1286.687088[0.066426];1286.705658[0.047856];1286.682983[0.070531];1286.736298[0.017216];1286.759811[-0.006297];1286.674759[0.078755];1286.759811[-0.006297];1286.723419[0.030095]	RDLVGKGGKMLN/;DVVAVGIGGSFLGP/;CPLAVAKIVPYN/;LEKLGLESREN/;SIIPLLSIRVP/Phospho (ST)[0000000200000];SLLLPINQPPPV/;SKKVIIQPSAX/Phospho (ST)[0000000002000];TIVIPKVQIXY/;LXPITQNIYLN/	25.780000;22.290000;22.120000;20.300000;20.250000;18.420000;17.650000;17.620000;17.260000	0.002642;0.005902;0.006138;0.009333;0.009441;0.014388;0.017179;0.017298;0.000000	3.490000;0.170000;1.820000;0.050000;1.830000;0.770000;0.030000;0.360000;NA	0.000001896695;0.000000849176;0.000000816578;0.000000537029;0.000000530881;0.000000348335;0.000000291741;0.000000289733;0.000000266684	0.000008;0.000004;0.000004;0.000002;0.000002;0.000002;0.000001;0.000001;0.000001
query6474	786.399	1570.78	2	1570.74	0.046849	F;F	NKVNYANVSTNNYA	L;L	139	118	131			72.2	0	0	Solyc06g083680.2.1;Solyc09g063130.2.1	59.03	0.999992	51.0495	cyr_090307_meja_05_2_bi4_p.01255.01255.2_28.614mins	1570.702820[0.081578];1570.714081[0.070317];1570.784744[-0.000346];1570.698608[0.085790];1570.786377[-0.001979];1570.786377[-0.001979];1570.701019[0.083379];1570.829651[-0.045253];1570.742615[0.041783]	QNVTLNNDLLNYA/Phospho (ST)[000020000000000];QTDPLNVNAGTPKH/Phospho (ST)[0000000000020000];QLRSMTAVAMVVFS/2 Oxidation (M)[0000010000100000];RLFYSGVLALWS/2 Phospho (ST)[00000200000020];KVIGMMKVATVEGI/Oxidation (M) Phospho (ST)[0000001000200000];KVIGMMKVATVEGI/Oxidation (M) Phospho (ST)[0000010000200000];TAFCKAHGGGRRCK/Phospho (ST)[0200000000000000];YAFVVQIVVYHHP/;VVMVTGASSGIGREI/Oxidation (M) Phosp…	13.170000;12.910000;12.070000;12.020000;11.250000;11.250000;10.630000;10.080000;9.820000	0.048195;0.051168;0.062087;0.062806;0.074989;0.074989;0.086497;0.098175;0.000000	0.260000;0.840000;0.050000;0.770000;0.000000;0.620000;0.550000;0.260000;NA	0.000001250249;0.000001177597;0.000000970502;0.000000959393;0.000000803520;0.000000803520;0.000000696621;0.000000613757;0.000000578092	0.000005;0.000005;0.000004;0.000004;0.000003;0.000003;0.000003;0.000003;0.000003
query3961	650.383	1298.75	2	1298.72	0.032873	L	LTVIGGASERVPT	L	287	273	285			86.53	1	0	Solyc06g063370.2.1	50.3	0.999985	48.2108	cyr_090307_meja_05_2_bi5_p.01493.01493.2_34.706mins	1298.780945[-0.028651];1298.663544[0.088750];1298.688705[0.063589];1298.759827[-0.007533];1298.755798[-0.003504];1298.738037[0.014257];1298.654037[0.098257];1298.652313[0.099981];1298.708221[0.044073]	LTVLNLSITLNV/;ITVLNFQKSGL/Phospho (ST)[0000000002000];LTVISVSLAVFA/Phospho (ST)[00000200000000];ITVGIGFKLSPAP/;TLVQVAIRGLTE/;ITVRAMVIINPG/Oxidation (M)[00000010000000];DTPINCQPVLIS/;VDVIKGEXLSI/Phospho (ST)[0000000000200];VDVIGVVQSVSPT/	36.230000;26.270000;26.190000;25.450000;25.080000;24.970000;24.630000;23.790000;23.750000	0.000238;0.002360;0.002404;0.002851;0.003105;0.003184;0.003443;0.004178;0.000000	9.960000;0.080000;0.740000;0.370000;0.110000;0.340000;0.840000;0.040000;NA	0.000009332402;0.000000941875;0.000000924684;0.000000779818;0.000000716133;0.000000698222;0.000000645644;0.000000532100;0.000000527222	0.000041;0.000004;0.000004;0.000003;0.000003;0.000003;0.000003;0.000002;0.000002
query4818	692.858	1383.7	2	1383.7	-0.002757	K	KFVENAATSFSIA	-	259	246	258			78.22	1	0	Solyc07g044860.2.1	52.23	0.999971	45.357	cyr_090307_meja_05_2_bi4_p.01650.01650.2_38.924mins	1383.639511[0.061147];1383.728577[-0.027919];1383.645279[0.055379];1383.639511[0.061147];1383.639511[0.061147];1383.611862[0.088796];1383.628296[0.072362];1383.628296[0.072362];1383.652649[0.048009]	VEKSSSVRGASPT/Phospho (ST)[000020000000000];VELAFLSTSFSAL/;QDMQVAATRFTT/Oxidation (M)[00010000000000];VEKSSSVRGASPT/Phospho (ST)[000000200000000];VEKSSSVRGASPT/Phospho (ST)[000002000000000];RFSFRRMSTT/Oxidation (M) Phospho (ST)[000200010000];TTAGLTAPGNSITT/Phospho (ST)[0020000000000000];TTAGLTAPGNSITT/Phospho (ST)[0200000000000000];KFNILSGTSMACP/Oxidation (M)[000000000010000]	25.990000;24.660000;24.270000;23.680000;23.680000;21.390000;21.010000;21.010000;20.780000	0.002518;0.003420;0.003741;0.004285;0.004285;0.007261;0.007925;0.007925;0.000000	1.330000;0.390000;0.590000;0.000000;2.290000;0.380000;0.000000;0.230000;NA	0.000005983942;0.000004405420;0.000004027053;0.000003515502;0.000003515502;0.000002074853;0.000001901023;0.000001901023;0.000001802965	0.000026;0.000019;0.000017;0.000015;0.000015;0.000009;0.000008;0.000008;0.000008
query7494	825.918	1649.82	2	1649.81	0.006933	M	EGVETFDIDLKEQK	V	82	28	41			72.53	1	0	Solyc05g055310.2.1	51.21	0.999959	43.823	cyr_090306_meja_005_bi6_2_p.01559.01559.2_36.661mins	1649.723251[0.098501];1649.858612[-0.036860];1649.724899[0.096853];1649.724899[0.096853];1649.921265[-0.099513];1649.864075[-0.042323];1649.827698[-0.005946];1649.897751[-0.075999];1649.829437[-0.007685]	KGCRSIDIDDPHSK/Phospho (ST)[0000000000000200];CLSIVFDLDETLIVA/;SPMSVKTDIQRTK/2 Phospho (ST)[020000020000000];SPMSVKTDIQRTK/2 Phospho (ST)[020020000000000];KRKHVEEVLQEKQ/;ISLTSVPVIEXEGAK/Phospho (ST)[00000200000000000];ISLTSVPVIEXEGAK/Phospho (ST)[00000200000000000];REVLLSRKGKEKQ/Phospho (ST)[000000200000000];LDLSSMTNQTIKLGGG/Oxidation (M)[000000100000000000]	21.320000;20.010000;19.240000;19.240000;18.950000;18.390000;18.390000;18.260000;17.430000	0.007379;0.009977;0.011912;0.011912;0.012735;0.014488;0.014488;0.014928;0.000000	1.310000;0.770000;0.000000;0.290000;0.560000;0.000000;0.130000;0.830000;NA	0.000007568015;0.000005597344;0.000004687939;0.000004687939;0.000004385125;0.000003854624;0.000003854624;0.000003740951;0.000003090167	0.000033;0.000024;0.000020;0.000020;0.000019;0.000017;0.000017;0.000016;0.000013
query4993	467.987	1400.94	3	1400.89	0.053536	Q	KVQLILNHVIPK	F	248	103	114			70.46	1	0	Solyc07g053540.1.1	48.23	0.999949	42.8942	cyr_090307_meja_05_2_bi3_p.01546.01546.3_36.005mins	1400.853683[0.086587];1400.886719[0.053551];1400.850342[0.089928];1400.911865[0.028405];1400.875488[0.064782];1400.890076[0.050194];1400.853699[0.086571];1400.875504[0.064766];1400.886734[0.053536]	KNLIIIREKMK/Oxidation (M)[0000000000100];KSHLIKLLPQPX/;KSHLIKLLPQPX/;NKILLLLAKXTF/;NKILLLLAKXTF/;KDLLKKMRXLI/Oxidation (M)[0000000100000];KDLLKKMRXLI/Oxidation (M)[0000000100000];KDPPIPAVKVPLK/;KQILVNLHIVPK/	22.230000;19.260000;19.260000;17.500000;17.500000;15.350000;15.350000;14.820000;13.770000	0.005984;0.011858;0.011858;0.017783;0.017783;0.029174;0.029174;0.032961;0.000000	2.970000;0.000000;1.760000;0.000000;2.150000;0.000000;0.530000;1.050000;NA	0.000015030648;0.000007585386;0.000007585386;0.000005057987;0.000005057987;0.000003083030;0.000003083030;0.000002728838;0.000002142781	0.000065;0.000033;0.000033;0.000022;0.000022;0.000013;0.000013;0.000012;0.000009
query10727	644.011	1929.01	3	1928.96	0.050666	L	EGRSTPVKFSAHLKEDE	F	172	150	166			67.73	1	0	Solyc01g087520.2.1	50.91	0.999945	42.6286	cyr_090307_meja_05_2_bi4_p.01182.01182.3_26.690mins	1929.019653[-0.009804];1929.002960[0.006889];1928.911392[0.098457];1929.037613[-0.027764];1928.918976[0.090873];1928.928497[0.081352];1929.002975[0.006874];1928.913239[0.096610];1928.955124[0.054725]	KDKVKKSNKFSKNGKN/Phospho (ST)[000000000002000000];KMFLHALSELIQGASTPS/;KYGQSNHLMRRMVLT/Oxidation (M) Phospho (ST)[00000000010000020];GAQTKKIKIEYTLIFP/Phospho (ST)[000000000000200000];KLLQEDKMDVYGTTSW/Oxidation (M)[000000001000000000];LASFIENFGTHIITSVT/Phospho (ST)[0002000000000000000];IEGNTLVKMGTYRYIGV/Oxidation (M)[0000000001000000000];KATIGVEFQTQTLEIDG/Phospho (ST)[0000000000002000000];KAEEIKRIS…	16.820000;16.480000;15.940000;15.750000;15.720000;15.500000;14.410000;14.410000;14.200000	0.020797;0.022491;0.025468;0.026607;0.026792;0.028184;0.036224;0.036224;0.000000	0.340000;0.540000;0.190000;0.030000;0.220000;1.090000;0.000000;0.210000;NA	0.000008109168;0.000007498533;0.000006621804;0.000006338351;0.000006294718;0.000005983789;0.000004655607;0.000004655607;0.000004435844	0.000035;0.000033;0.000029;0.000028;0.000027;0.000026;0.000020;0.000020;0.000019
query10702	964.983	1927.95	2	1927.89	0.059758	F;F	NKVNYANVSTNNYALDE	I;V	139	118	134			63.34	0	0	Solyc06g083680.2.1;Solyc09g063130.2.1	47.62	0.999944	42.5203	cyr_090307_meja_05_2_bi5_p.01452.01452.2_33.634mins	1927.919327[0.031575];1927.871033[0.079869];1927.928238[0.022664];1927.892853[0.058049];1927.918610[0.032292];1927.929214[0.021688];1927.929214[0.021688];1927.918610[0.032292];1927.919693[0.031209]	PPTGPGPAPSNVASRSFIP/Phospho (ST)[000200000000000000000];QTKATNRVVTMINEDE/Phospho (ST)[000002000000000000];DMLSRGQVEHVRSERN/Oxidation (M)[001000000000000000];VSFGSLAAAVSSGASGPPTSV/Phospho (ST)[00000000000000000002000];KLSKNLQSIMARNSEN/Oxidation (M) Phospho (ST)[000000002010000000];IDLSKNDFSGKIPSTLGG/Phospho (ST)[00000000000000020000];IDLSKNDFSGKIPSTLGG/Phospho (ST)[00000000000000200000];KLSKNLQSIM…	15.720000;11.860000;10.750000;10.720000;9.850000;9.440000;9.440000;9.360000;9.320000	0.026792;0.065163;0.084140;0.084723;0.103514;0.113763;0.113763;0.115878;0.000000	3.860000;1.110000;0.030000;0.870000;0.410000;0.000000;0.080000;0.040000;NA	0.000017297195;0.000007111737;0.000005507769;0.000005469853;0.000004476882;0.000004073575;0.000004073575;0.000003999224;0.000003962559	0.000075;0.000031;0.000024;0.000024;0.000019;0.000018;0.000018;0.000017;0.000017
query4085	656.345	1310.67	2	1310.67	0.003134	A;A	SSYADELVKTAK	T;T	396	46	57			69.39	0	0	Solyc02g062340.2.1;Solyc02g084440.2.1	48.08	0.999943	42.4626	cyr_090307_meja_05_2_bi3_p.01366.01366.2_31.291mins	1310.611877[0.063025];1310.586746[0.088156];1310.688690[-0.013788];1310.601990[0.072912];1310.671768[0.003134];1310.667755[0.007147];1310.644165[0.030737];1310.586746[0.088156];1310.613220[0.061682]	QSLDELINTAK/Phospho (ST)[0020000000000];AQLQSASVQTAQ/Phospho (ST)[00000002000000];SVAAPIFILLTS/Phospho (ST)[02000000000000];AVSAFEVARAPN/Phospho (ST)[00020000000000];SSYEIVSTNALK/;SSSSSLISRSLST/;LHVPVMGHSYGV/Oxidation (M)[00000010000000];AQLQSASVQTAQ/Phospho (ST)[00000200000000];SSINPPRFRAS/Phospho (ST)[0000000000020]	21.310000;20.430000;17.810000;17.530000;15.350000;15.010000;13.610000;13.320000;12.980000	0.007396;0.009057;0.016558;0.017660;0.029174;0.031550;0.043551;0.046559;0.000000	0.880000;2.620000;0.280000;2.180000;0.340000;1.400000;0.290000;0.340000;NA	0.000015558774;0.000012705020;0.000006949849;0.000006515914;0.000003944349;0.000003647333;0.000002642259;0.000002471584;0.000002285469	0.000068;0.000055;0.000030;0.000028;0.000017;0.000016;0.000011;0.000011;0.000010
query4800	692.393	1382.77	2	1382.79	-0.020961	F	LLYQEPVLGPVR	G	222	204	215			72.62	1	0	caseinbeta	44.42	0.999927	41.3634	cyr_090307_meja_05_2_bi4_p.01695.01695.2_40.102mins	1382.778244[-0.007030];1382.765671[0.005543];1382.835754[-0.064540];1382.792160[-0.020946];1382.755783[0.015431];1382.824509[-0.053295];1382.776917[-0.005703];1382.763153[0.008061];1382.780930[-0.009716]	LLYKHGGPKRTN/;LIDALPNLEIVSS/;LIKLTPATRQRX/;LLFILHQEKKD/;LLYSFLSLRNTG/;PTGLALAIEKKSR/;ITVLNVPLGSENK/;LLYKAMQYLLQ/;IIYQTKILQTY/	28.200000;22.190000;19.410000;19.410000;19.410000;19.010000;17.890000;17.670000;16.800000	0.001514;0.006039;0.011455;0.011455;0.011455;0.012560;0.016255;0.017100;0.000000	6.010000;2.780000;0.000000;0.000000;0.400000;1.120000;0.220000;0.870000;NA	0.000036138346;0.000009056664;0.000004774944;0.000004774944;0.000004774944;0.000004354801;0.000003364870;0.000003198661;0.000002617992	0.000157;0.000039;0.000021;0.000021;0.000021;0.000019;0.000015;0.000014;0.000011
query14358	1152.56	2303.11	2	2303.07	0.042074	R	FNKVNYANVSTNNYALDEVE	E	141	118	137			64.74	1	0	Solyc09g063130.2.1	48.41	0.999927	41.3567	cyr_090307_meja_05_2_bi5_p.01616.01616.2_37.913mins	2303.105469[0.007177];2303.105469[0.007177];2303.111984[0.000662];2303.111984[0.000662];2303.053238[0.059408];2303.202393[-0.089747];2303.111984[0.000662];2303.111984[0.000662];2303.107635[0.005011]	IVNLHGLTKNLPSACTSVMEP/Phospho (ST)[00000000000002000000000];IVNLHGLTKNLPSACTSVMEP/Phospho (ST)[00000000200000000000000];SSPTALSLLLRSSMFQELVE/Oxidation (M) Phospho (ST)[0000000200000010000000];SSPTALSLLLRSSMFQELVE/Oxidation (M) Phospho (ST)[0000200000000010000000];KRSQKRANVNSNTLGGQSGAA/2 Phospho (ST)[00020000000000000020000];MPIAVYVLFYFINPKSTRE/Oxidation (M)[010000000000000000000];SSPTALSLLLRSSMFQ…	16.330000;16.330000;14.030000;14.030000;13.340000;11.900000;11.790000;11.790000;11.520000	0.023281;0.023281;0.039537;0.039537;0.046345;0.064565;0.066222;0.066222;0.000000	0.000000;2.300000;0.000000;0.690000;1.440000;0.110000;0.000000;0.270000;NA	0.000014420098;0.000014420098;0.000008491183;0.000008491183;0.000007243830;0.000005199579;0.000005069536;0.000005069536;0.000004763961	0.000063;0.000063;0.000037;0.000037;0.000031;0.000023;0.000022;0.000022;0.000021
query3359	626.304	1250.59	2	1250.6	-0.009685	M	EGVESFDIDIK	E	114	28	38			72.3	1	0	Solyc11g007200.1.1	44.12	0.999872	38.9438	cyr_090307_meja_05_2_bi5_p.01707.01707.2_40.281mins	1250.581238[0.012120];1250.566650[0.026708];1250.614258[-0.020900];1250.615128[-0.021770];1250.570023[0.023335];1250.621658[-0.028300];1250.661865[-0.068507];1250.566681[0.026677];1250.658051[-0.064693]	EERSMELTQL/Oxidation (M)[000001000000];ELQDYDLDLQ/;ERESYEVVIQ/;ERFICDMPIK/;VEVSSMDLENL/Oxidation (M)[0000001000000];EKLMFDLQVE/;ERSFEGKASKL/;TDDFGLDLDAVA/;MVALSYLVDGLA/	28.180000;25.090000;24.890000;24.320000;23.660000;22.760000;18.110000;17.850000;17.790000	0.001521;0.003097;0.003243;0.003698;0.004305;0.005297;0.015453;0.016406;0.000000	3.090000;0.200000;0.570000;0.660000;0.900000;4.650000;0.260000;0.060000;NA	0.000038720826;0.000019008358;0.000018152841;0.000015920057;0.000013675544;0.000011115899;0.000003810172;0.000003588762;0.000003539522	0.000168;0.000083;0.000079;0.000069;0.000059;0.000048;0.000017;0.000016;0.000015
query6984	806.915	1611.82	2	1611.79	0.022588	Q;Q	APQEKGFAAFATDFL	M;M	387	77	91			64.73	0	0	Solyc11g062130.1.1;Solyc11g062190.1.1	44.72	0.99986	38.538	cyr_090307_meja_05_2_bi3_p.02154.02154.2_51.836mins	1611.732346[0.083546];1611.855835[-0.039943];1611.739182[0.076710];1611.800049[0.015843];1611.848328[-0.032436];1611.784393[0.031499];1611.887177[-0.071285];1611.740585[0.075307];1611.719421[0.096471]	RAAAFAKRSQSFI/2 Phospho (ST)[000000000202000];IISTALMTIGIAIVT/Oxidation (M) Phospho (ST)[00020001000000000];HPTVMFADNSSFLF/;KXQIGAVTAMETGLF/Oxidation (M)[00000000001000000];QVWKSVTFAALCFL/;IISATQHMLSRIF/Oxidation (M) Phospho (ST)[000200001000000];KKKXLSELGATDFL/;EARINEANVTRXY/Phospho (ST)[000000000020000];MAVEAVVEDGLTMMT/Oxidation (M)[00000000000000100]	20.010000;18.110000;17.920000;15.770000;15.620000;15.460000;15.460000;13.580000;13.410000	0.009977;0.015453;0.016144;0.026485;0.027416;0.028445;0.028445;0.043853;0.000000	1.900000;0.190000;2.150000;0.150000;0.160000;0.000000;1.880000;0.170000;NA	0.000033724008;0.000021774048;0.000020841990;0.000012703962;0.000012272674;0.000011828759;0.000011828759;0.000007672540;0.000007378009	0.000146;0.000095;0.000091;0.000055;0.000053;0.000051;0.000051;0.000033;0.000032
query5178	712.398	1422.78	2	1422.71	0.066167	L	AFIPGNFSVSAGEK	I	171	84	97			65.32	1	0	Solyc04g082010.1.1	44.01	0.999851	38.2753	cyr_090307_meja_05_2_bi3_p.01687.01687.2_39.669mins	1422.748337[0.032155];1422.752365[0.028127];1422.755722[0.024770];1422.826843[-0.046351];1422.775864[0.004628];1422.754074[0.026418];1422.771820[0.008672];1422.808228[-0.027736];1422.773453[0.007039]	SAVAQKVISQLVT/Phospho (ST)[020000000000000];KFQTLPSIPLXT/Phospho (ST)[00000002000000];KTXAALILMPIVT/Oxidation (M) Phospho (ST)[002000000100000];KTXAALILMPIVT/Oxidation (M)[000000000100000];LGFTKYLDGPLLS/;MSPSKVLKGVQYX/Oxidation (M)[010000000000000];IEAELGPEPRIVT/;AGVAPALSPLSAGLVT/;ELTLKIVSKIEA/Phospho (ST)[00020000000000]	21.310000;18.060000;17.360000;17.360000;16.630000;16.490000;16.240000;15.460000;14.850000	0.007396;0.015631;0.018365;0.018365;0.021727;0.022439;0.023768;0.028445;0.000000	3.250000;0.700000;0.000000;0.730000;0.140000;0.250000;0.780000;0.610000;NA	0.000039713247;0.000018790373;0.000015993201;0.000015993201;0.000013518714;0.000013089872;0.000012357636;0.000010326078;0.000008972953	0.000172;0.000082;0.000069;0.000069;0.000059;0.000057;0.000054;0.000045;0.000039
query8183	853.472	1704.93	2	1704.86	0.071142	L	IMVTSTSLMLFAGRF	G	131	56	70	2 Oxidation (M)	[00100000010000000]	66.89	1	0	Solyc08g006930.2.1	42.36	0.99984	37.9635	cyr_090307_meja_05_2_bi4_p.02014.02014.2_48.404mins	1704.941025[-0.011973];1704.865082[0.063970];1704.868256[0.060796];1704.912689[0.016363];1704.977417[-0.048365];1704.872299[0.056753];1704.840912[0.088140];1704.937836[-0.008784];1704.879486[0.049566]	PVYSTSLREIVTVKN/;KMQSPIDISSCRVKN/;SDGIVERYLDPTVKN/;IEQISKRCMRTVKN/;TGYILTIVDLRTVNK/;FILSSTSTFRFTGIE/;SSSTSATLLCLFLLLG/Phospho (ST)[000000020000000000];LNKGNMMKIKSTVKN/;DKVETRKLSTSQQW/	24.530000;21.390000;19.470000;18.710000;16.790000;16.570000;15.760000;15.370000;14.990000	0.003524;0.007261;0.011298;0.013459;0.020941;0.022029;0.026546;0.029040;0.000000	3.140000;1.920000;0.760000;1.920000;0.220000;0.810000;0.390000;0.380000;NA	0.000058067160;0.000028179325;0.000018110506;0.000015203045;0.000009770810;0.000009288179;0.000007707803;0.000007045804;0.000006455510	0.000252;0.000122;0.000079;0.000066;0.000042;0.000040;0.000033;0.000031;0.000028
query8259	856.516	1711.02	2	1711.02	-0.001536	Q	KVQLILNHVIPKFY	T	248	103	116			66.04	1	0	Solyc07g053540.1.1	42.59	0.999816	37.3456	cyr_090307_meja_05_2_bi4_p.01825.01825.2_43.478mins	1710.921738[0.095204];1711.003876[0.013066];1710.991974[0.024968];1710.982101[0.034841];1710.923920[0.093022];1710.926437[0.090505];1711.014450[0.002492];1711.014465[0.002477];1710.981430[0.035512]	KTFPLVLACLMAVII/Phospho (ST)[00200000000000000];QPEAKLRRRKMLLG/Oxidation (M)[0000000000010000];KKYNLSIVVLASIYT/;FRYSIVPFGGSKILK/;QPKAELRMPHPLPPT/;QPVTQLSATISAPRKD/;VKTKVSRFLIAAELH/;ANVRLTPPVLPPKPVN/;QVLKKAMAAALTSHKV/Oxidation (M)[000000010000000000]	23.450000;20.690000;19.270000;18.820000;18.100000;18.100000;16.160000;16.040000;14.860000	0.004519;0.008531;0.011830;0.013122;0.015488;0.015488;0.024210;0.024889;0.000000	2.760000;1.420000;0.450000;0.720000;0.000000;1.940000;0.120000;1.180000;NA	0.000055070620;0.000029168894;0.000021033908;0.000018963564;0.000016066451;0.000016066451;0.000010278269;0.000009998157;0.000007619386	0.000239;0.000127;0.000091;0.000082;0.000070;0.000070;0.000045;0.000043;0.000033
query6590	789.869	1577.72	2	1577.72	-0.000849	A;A;A	KYGDKSVYFDLED	L;L;L	146	51	63			68.21	0	0	Solyc03g120640.2.1;Solyc06g066640.2.1;Solyc12g044280.1.1	40.8	0.999776	36.4968	cyr_090306_meja_005_bi6_2_p.01582.01582.2_37.276mins	1577.772568[-0.048472];1577.655548[0.068548];1577.746078[-0.021982];1577.823547[-0.099451];1577.712662[0.011434];1577.703171[0.020925];1577.775940[-0.051844];1577.699371[0.024725];1577.783798[-0.059702]	KNGKDIWVFDIDE/;EVFQGESCPPELED/;SLTSDLIAWTDIED/;KQLAKRFDTDLMP/Oxidation (M)[000000000000100];QDGYHNLLLSLEP/Phospho (ST)[000000000020000];QAQCNFVSLPDLED/;KGLSSMISGNPDIPF/Oxidation (M)[00000010000000000];DFIDMVTVTFMDL/2 Oxidation (M)[000001000001000];KERSTHVFXFIED/	27.410000;25.350000;22.460000;19.500000;19.160000;18.860000;17.680000;17.660000;16.880000	0.001816;0.002917;0.005675;0.011220;0.012134;0.013002;0.017061;0.017140;0.000000	2.060000;2.890000;2.960000;0.340000;0.300000;1.180000;0.020000;0.780000;NA	0.000083157743;0.000051749087;0.000026601290;0.000013455588;0.000012442358;0.000011611884;0.000008849173;0.000008808515;0.000007360422	0.000361;0.000225;0.000116;0.000058;0.000054;0.000050;0.000038;0.000038;0.000032
query7782	834.908	1667.8	2	1667.78	0.018697	L	VGDYGFDPFGLGKPAE	Y	286	67	82			61.53	1	0	Solyc09g014520.2.1	40.32	0.999698	35.2025	cyr_090307_meja_05_2_bi7_p.01931.01931.2_46.000mins	1667.718735[0.083119];1667.730469[0.071385];1667.730469[0.071385];1667.837952[-0.036098];1667.851852[-0.049998];1667.830780[-0.028926];1667.708649[0.093205];1667.847031[-0.045177];1667.807632[-0.005778]	VCLEKLMDSYSSTI/Phospho (ST)[0000000002000000];QGISDVAFSSDGRHL/Phospho (ST)[00000000020000000];QGISDVAFSSDGRHL/Phospho (ST)[00000000002000000];QGGSNGIGYGLKYQAR/;KGFRSIPEDESYLK/;FSTGGRVLDPFWSSL/;KCASESNRGLSGKHD/Phospho (ST)[00002000000000000];PTGRIVMGLFGKTVP/Oxidation (M) Phospho (ST)[00200001000000000];SPSNALTFLVMSESLG/Oxidation (M)[000000000001000000]	21.210000;19.170000;17.690000;14.900000;14.460000;14.140000;14.070000;13.960000;13.170000	0.007568;0.012106;0.017022;0.032359;0.035810;0.038548;0.039174;0.040179;0.000000	2.040000;1.480000;2.790000;0.440000;0.320000;0.070000;0.110000;0.790000;NA	0.000092868601;0.000058058913;0.000041292284;0.000021720454;0.000019627677;0.000018233452;0.000017941919;0.000017493185;0.000014583740	0.000403;0.000252;0.000179;0.000094;0.000085;0.000079;0.000078;0.000076;0.000063
query13420	1093.59	2185.17	2	2185.16	0.011678	R	DMPIQAFLLYQEPVLGPVR	G	222	197	215			59.23	1	0	caseinbeta	42.69	0.99966	34.6852	cyr_090306_meja_005_bi9_2_p.02490.02490.2_55.032mins	2185.192902[-0.020686];2185.129639[0.042577];2185.129608[0.042608];2185.129608[0.042608];2185.272171[-0.099955];2185.107162[0.065054];2185.200775[-0.028559];2185.151154[0.021062];2185.125809[0.046407]	RKSGQVMGFTILLQKITYS/Oxidation (M)[000000010000000000000];RLTGAYRLFGSEVLGGLLPS/Phospho (ST)[0000000000000000000020];VKVRSSNLKYLLGENWIS/Phospho (ST)[00000020000000000000];VKVRSSNLKYLLGENWIS/Phospho (ST)[00000200000000000000];ETKLALLPYIGALTNVATKAV/;ELKNGYVSFLALVPELTVN/Phospho (ST)[000000000000000002000];LLGVDGTVHHKLLADHYGLK/;LMLGLQMLLIMSLRLVMV/2 Oxidation (M) Phospho (ST)[00000001000020000100];FGATL…	16.540000;16.540000;16.540000;16.540000;14.060000;13.150000;13.060000;13.060000;12.540000	0.022182;0.022182;0.022182;0.022182;0.039264;0.048417;0.049431;0.049431;0.000000	0.000000;0.000000;0.000000;2.480000;0.910000;0.090000;0.000000;0.520000;NA	0.000053808677;0.000053808677;0.000053808677;0.000053808677;0.000030398511;0.000024652009;0.000024146396;0.000024146396;0.000021421620	0.000234;0.000234;0.000234;0.000234;0.000132;0.000107;0.000105;0.000105;0.000093
query10052	934.017	1866.02	2	1866.05	-0.027643	E	LAAVKINAADIDIIANEL	E	111	66	83			67.04	1	0	Solyc12g099240.1.1	35.38	0.999577	33.7384	cyr_090307_meja_05_2_bi3_p.02117.02117.2_50.870mins	1866.093842[-0.075312];1865.949951[0.068579];1866.046204[-0.027674];1866.068634[-0.050104];1866.068695[-0.050165];1866.068649[-0.050119];1865.990356[0.028174];1865.990356[0.028174];1866.015671[0.002859]	GVVVLAGTNRLDILDKAL/;QSAIGAKTEVIDKQVTV/Phospho (ST)[0000000020000000000];LEVSVAPAAVSNGLLGLEK/;LAAAGEGVRELKLLANKX/;AVLQRSGRDVILINVDV/;RSIALIAERSPNLQVLS/;ATSLLTWLVLDIAVSGK/Phospho (ST)[0002000000000000000];ATSLLTWLVLDIAVSGK/Phospho (ST)[0020000000000000000];SRSPARGRGSPRRRSPS/	31.660000;25.230000;18.440000;16.910000;16.890000;16.660000;16.320000;16.320000;16.110000	0.000682;0.002999;0.014322;0.020370;0.020464;0.021577;0.023335;0.023335;0.000000	6.430000;6.790000;1.530000;0.020000;0.230000;0.340000;0.000000;0.210000;NA	0.000289611853;0.000065889518;0.000013798006;0.000009700996;0.000009656424;0.000009158331;0.000008468692;0.000008468692;0.000008068937	0.001258;0.000286;0.000060;0.000042;0.000042;0.000040;0.000037;0.000037;0.000035
query9553	913.023	1824.03	2	1824.05	-0.015407	M	VLNEANLTNAVLVRSVL	T	265	159	175			62.46	1	0	Solyc08g079110.2.1	36.27	0.999518	33.1699	cyr_090307_meja_05_2_bi3_p.01996.01996.2_47.727mins	1823.962891[0.068577];1824.021713[0.009755];1823.963745[0.067723];1823.952133[0.079335];1823.966919[0.064549];1823.946777[0.084691];1823.946777[0.084691];1824.083237[-0.051769];1824.060806[-0.029338]	KSVLVDDVKSLTSRXD/;GLERGQLSLANLLDIGR/;FMTMITLITSLVRANN/;PIFQGLMKSGIRVWI/Phospho (ST)[00000000020000000];ISLSGYFSGLNIVVGIDA/;ASMLLGLGGASILQTVTI/Phospho (ST)[00000000000000000200];ASMLLGLGGASILQTVTI/Phospho (ST)[00000000000000020000];LLDQKEAGKRLLLITN/;VITEDIKAGLVLVDIIN/	26.190000;21.130000;20.460000;18.010000;16.160000;13.770000;13.770000;13.150000;13.000000	0.002404;0.007709;0.008995;0.015812;0.024210;0.041976;0.041976;0.048417;0.000000	5.060000;0.670000;2.450000;1.850000;2.390000;0.000000;0.620000;0.150000;NA	0.000235934059;0.000073585228;0.000063065325;0.000035874895;0.000023430990;0.000013514209;0.000013514209;0.000011716304;0.000011318546	0.001025;0.000320;0.000274;0.000156;0.000102;0.000059;0.000059;0.000051;0.000049
query7243	815.948	1629.88	2	1629.88	0.00057	S	MTNLNLPSIFVPLVG	L	73	37	51	Oxidation (M)	[01000000000000000]	58.97	1	0	Solyc01g007350.2.1	36.78	0.999482	32.8528	cyr_090307_meja_05_2_bi4_p.02394.02394.2_58.174mins	1629.807907[0.072683];1629.846130[0.034460];1629.945374[-0.064784];1629.850815[0.029775];1629.909653[-0.029063];1629.783737[0.096853];1629.891235[-0.010645];1629.849106[0.031484];1629.808594[0.071996]	REVVMMSRVKHEN/Oxidation (M)[000001000000000];LSALVEVTDLDQLNT/;LVLSAFLALRAAVETG/;NNRMDLLALLTSGVN/;KKARMKTRTEHKT/Oxidation (M)[000001000000000];ITQVMLEKGTNFIG/Phospho (ST)[0000000000200000];PIFNTLDKAMLPVR/Oxidation (M)[0000000000100000];KILHGPTTLKSASPT/Phospho (ST)[00000000200000000];TAHMAGGFNIFVHKT/	22.190000;17.610000;15.560000;15.270000;14.570000;14.430000;13.740000;12.920000;12.230000	0.006039;0.017338;0.027797;0.029717;0.034914;0.036058;0.042267;0.051050;0.000000	4.580000;2.050000;0.290000;0.700000;0.140000;0.690000;0.820000;0.690000;NA	0.000209785164;0.000073076001;0.000045580047;0.000042635835;0.000036288981;0.000035137817;0.000029976075;0.000024818457;0.000021172628	0.000911;0.000317;0.000198;0.000185;0.000158;0.000153;0.000130;0.000108;0.000092
query17144	1324.71	2647.41	2	2647.37	0.032124	T	APTKIGNGYSLIAIEESPDGGLIGYL	K	929	27	52			54.21	1	0	Solyc05g009470.2.1	37.72	0.999391	32.1514	cyr_090307_meja_05_2_bi3_p.02199.02199.2_53.014mins	2647.453979[-0.047389];2647.367966[0.038624];2647.317596[0.088994];2647.317596[0.088994];2647.411545[-0.004955];2647.401962[0.004628];2647.478439[-0.071849];2647.463821[-0.057231];2647.434662[-0.028072]	KVVLISSCIIETLDSATKKVLMDAA/;VARLALRFFDPLMPTDEPLTKSD/Oxidation (M)[0000000000000100000000000];VVQLIRGLASVPAANSAQSVVVFY/2 Phospho (ST)[00000000002000002000000000];VVQLIRGLASVPAANSAQSVVVFY/2 Phospho (ST)[00000000002000000002000000];SMRLLSNSQIPSVFTKDILNNRV/Oxidation (M)[0010000000000000000000000];PTQLVKKCLSALVTSASLIASHTSL/Phospho (ST)[000000000020000000000000000];IVKIDRAPPAPGAILPDRRMLFX/Oxidation (M)[…	16.490000;14.680000;13.730000;13.380000;11.160000;10.240000;7.950000;7.640000;7.590000	0.022439;0.034041;0.042364;0.045920;0.076560;0.094624;0.160325;0.172187;0.000000	1.810000;0.950000;0.350000;2.220000;0.920000;2.290000;0.310000;0.050000;NA	0.000168941088;0.000111361555;0.000089481918;0.000082553461;0.000049514829;0.000040062245;0.000023644780;0.000022015841;0.000021763828	0.000734;0.000484;0.000389;0.000359;0.000215;0.000174;0.000103;0.000096;0.000095
query12989	714.726	2141.16	3	2141.11	0.051291	D	SHNDPLFHFGFGLTTKPVK	A	630	608	626			46.63	1	0	Solyc11g071640.1.1	32.09	0.998664	28.7429	cyr_090307_meja_05_2_bi3_p.01767.01767.3_41.750mins	2141.136826[0.020300];2141.149109[0.008017];2141.072052[0.085074];2141.065689[0.091437];2141.126266[0.030860];2141.148926[0.008200];2141.098907[0.058219];2141.060883[0.096243];2141.190094[-0.032968]	KIIVSFSSKGFDERETVSL/;KIPFIGFMLFCVLAMVIEA/;KLPRTLGLSMSLGPPKGTL/Oxidation (M) 2 Phospho (ST)[000000000212000000000];GSGEVSITVNAYPAKELILT/Phospho (ST)[0020000000000000000000];KDIPIPMSARKGGKVGSSSNP/Oxidation (M)[00000001000000000000000];LHPTVYVPVRLMMTERIS/;LKLPLTMSDRGLSKISCSL/Phospho (ST)[000000002000000000000];DCMVSLLKKAEVNQSSFRS/;KLDPLLTAYVHLLKELVP/Phospho (ST)[00000002000000000000]	14.540000;7.290000;6.940000;6.890000;6.560000;6.440000;4.950000;4.840000;4.500000	0.035156;0.186638;0.202302;0.204644;0.220800;0.226986;0.319890;0.328095;0.000000	7.250000;0.350000;0.050000;0.330000;0.120000;1.490000;0.110000;0.340000;NA	0.000617190910;0.000116257110;0.000107255488;0.000106027744;0.000098269675;0.000095591554;0.000067829641;0.000066133198;0.000061153247	0.002681;0.000505;0.000466;0.000460;0.000427;0.000415;0.000295;0.000287;0.000266
query5311	719.445	1436.87	2	1436.84	0.035863	F	LEIAGLISPHFLK	-	147	134	146			78.24	1	0	Solyc01g107330.2.1	29.64	0.998599	28.5347	cyr_090307_meja_05_2_bi3_p.01956.01956.2_46.676mins	1436.857544[0.017430];1436.775177[0.099797];1436.885376[-0.010402];1436.787476[0.087498];1436.871445[0.003529];1436.932983[-0.058009];1436.782578[0.092396];1436.804367[0.070607];1436.792160[0.082814]	KINQIISPRXVN/;KNLSRELIGSKI/Phospho (ST)[00000000002000];IELKIILIDLPSA/;ELLEALTAIGATHV/;EIIERSLPKKPK/;ELQILIILKLNK/;GANKILLLLAKXT/Phospho (ST)[000000000000020];FELLPKLLKLSG/Phospho (ST)[00000000000200];NKLQLIIRAHEC/	48.600000;40.680000;36.160000;32.490000;31.140000;30.010000;28.060000;24.660000;24.660000	0.000014;0.000086;0.000242;0.000564;0.000769;0.000998;0.001563;0.003420;0.000000	7.920000;4.520000;3.670000;1.350000;1.130000;1.950000;3.400000;0.000000;NA	0.001084903223;0.000175142280;0.000061857306;0.000026569966;0.000019471123;0.000015010356;0.000009580562;0.000004379162;0.000004379162	0.004714;0.000761;0.000269;0.000115;0.000085;0.000065;0.000042;0.000019;0.000019
query6227	770.961	1539.91	2	1539.89	0.020879	K;K	ENLELIVGLVKEGK	L;L	275	227	240			69.64	0	0	Solyc09g059020.2.1;Solyc09g059030.2.1	31	0.998577	28.4667	cyr_090307_meja_05_2_bi5_p.01856.01856.2_44.166mins	1539.825653[0.082403];1539.898422[0.009634];1539.817413[0.090643];1539.858200[0.049856];1539.946030[-0.037974];1539.895920[0.012136];1539.873230[0.034826];1539.852127[0.055929];1539.840912[0.067144]	EGVAEIVLDRVINN/;GALEDLLRVIVTNK/;TRFNIVLGTAKGLA/Phospho (ST)[0200000000000000];DLQELLPSAIIMVV/;KQSAALIGGRSKIVL/;LRSFVLLMLXIAQ/;EARNKLQLEIKAQ/;SRLEIIRXEAHVF/;QFQKIPSLLDSHK/	38.640000;35.850000;27.860000;24.580000;24.160000;23.470000;23.290000;22.810000;22.500000	0.000137;0.000260;0.001637;0.003483;0.003837;0.004498;0.004688;0.005236;0.000000	2.790000;7.990000;3.280000;0.420000;0.690000;0.180000;0.480000;0.310000;NA	0.000793197585;0.000417235625;0.000066279830;0.000031144501;0.000028273618;0.000024120227;0.000023140961;0.000020719601;0.000019292183	0.003446;0.001812;0.000288;0.000135;0.000123;0.000105;0.000101;0.000090;0.000084
query18818	983.803	2948.39	3	2948.4	-0.012246	A	AYGEAANVFGKPKENTDFLPYNGDGFK	L	259	73	99			43.6	1	0	Solyc07g044860.2.1	34.82	0.998571	28.4482	cyr_090307_meja_05_2_bi4_p.01699.01699.3_40.208mins	2948.480072[-0.094247];2948.380371[0.005454];2948.380432[0.005393];2948.377243[0.008582];2948.377243[0.008582];2948.448883[-0.063058];2948.364304[0.021521];2948.402054[-0.016229];2948.442474[-0.056649]	VDNAYPDGLLNGLEIMKISNVKGSLDAS/Oxidation (M)[000000000000000010000000000000];VDYLATISPFSWGMWSGRGGFSDIGGIG/Oxidation (M)[000000000000001000000000000000];TYSGLIHSCCLQCIIYSVILRKLY/2 Phospho (ST)[00000000200000000200000000];MERVGKLMENYLAEIASDRNLSVTN/Oxidation (M) Phospho (ST)[000000001000000000000020000];MERVGKLMENYLAEIASDRNLSVTN/Oxidation (M) Phospho (ST)[000000001000000002000000000];SQKSSHNQGQTEIHRQQ…	8.780000;6.840000;5.740000;5.160000;5.160000;4.720000;4.410000;3.440000;3.360000	0.132434;0.207014;0.266686;0.304789;0.304789;0.337287;0.362243;0.452898;0.000000	1.940000;1.100000;0.580000;0.000000;0.440000;0.310000;0.970000;0.080000;NA	0.000329138543;0.000210561392;0.000163447673;0.000143014062;0.000143014062;0.000129234582;0.000120331337;0.000096245125;0.000094488454	0.001430;0.000915;0.000710;0.000621;0.000621;0.000561;0.000523;0.000418;0.000410
query8795	876.015	1750.01	2	1750	0.011586	D	PPLAVFQLDKVLVPSQ	F	248	170	185			66.99	1	0	Solyc07g053540.1.1	28.55	0.998417	28.0051	cyr_090307_meja_05_2_bi3_p.02145.02145.2_51.602mins	1749.944717[0.069783];1750.000504[0.013996];1749.921219[0.093281];1750.024033[-0.009533];1749.984940[0.029560];1750.024002[-0.009502];1749.925049[0.089451];1750.032562[-0.018062];1749.998901[0.015599]	IARIKSTDIKMFPSQ/Oxidation (M)[00000000000100000];KTTPKSLQTIKLLSI/Phospho (ST)[00000020000000000];SSLMPRTKGGLLVPSK/Phospho (ST)[000000020000000000];IVLLVSDKIEGPGVSPK/;SSRVNLISHLREVLQ/;TKLSSIVSFLKESIAK/;RKRKVSEDKVQLGQ/Phospho (ST)[0000002000000000];ERRNLRVKGVLVTNP/;REEGVVPDKVVLVNVV/	38.440000;25.020000;21.900000;20.720000;18.830000;18.750000;18.370000;18.300000;18.300000	0.000143;0.003148;0.006457;0.008472;0.013092;0.013335;0.014555;0.014791;0.000000	13.420000;3.120000;1.180000;1.890000;0.080000;0.380000;0.070000;0.000000;NA	0.001394157875;0.000063432519;0.000030925160;0.000023567415;0.000015251479;0.000014973108;0.000013718668;0.000013499322;0.000013499322	0.006059;0.000275;0.000134;0.000102;0.000066;0.000065;0.000060;0.000059;0.000059
query13461	730.747	2189.22	3	2189.19	0.029624	Q	KVQLILNHVIPKFYTFDD	L	248	103	120			50.98	1	0	Solyc07g053540.1.1	36.34	0.998373	27.8865	cyr_090307_meja_05_2_bi5_p.01905.01905.3_45.437mins	2189.223541[-0.005440];2189.190521[0.027580];2189.173782[0.044319];2189.127808[0.090293];2189.145691[0.072410];2189.145691[0.072410];2189.145691[0.072410];2189.126190[0.091911];2189.126190[0.091911]	LVLSXLVSSVFTLSSITLTY/;LVLSXLVSSVFTLSSITLTY/Oxidation (M)[0000010000000000000000];KIASREGLPIVRLSAIPXL/2 Phospho (ST)[000020000000002000000];QFIMYMAFLVRVHLSTHP/;KKHIASTVSIVDVKDVGISN/Phospho (ST)[0000000002000000000000];KKHIASTVSIVDVKDVGISN/Phospho (ST)[0000000200000000000000];KKHIASTVSIVDVKDVGISN/Phospho (ST)[0000002000000000000000];TITKEISVLVLKWSSGLR/2 Phospho (ST)[00020002000000000000];TITKEISVLV…	14.640000;14.640000;14.390000;14.390000;12.630000;12.630000;12.630000;12.560000;12.560000	0.034356;0.034356;0.036392;0.036392;0.054576;0.054576;0.054576;0.055463;0.000000	0.000000;0.250000;0.000000;1.760000;0.000000;0.000000;0.070000;0.000000;NA	0.000231895801;0.000231895801;0.000218923753;0.000218923753;0.000145979840;0.000145979840;0.000145979840;0.000143645784;0.000143645784	0.001007;0.001007;0.000951;0.000951;0.000634;0.000634;0.000634;0.000624;0.000624
query3731	642.881	1283.75	2	1283.73	0.013403	M;M	ASLFLHVQKNK	I;I	73	60	70			56.85	0	0	Solyc01g007350.2.1;Solyc07g024040.1.1	31.72	0.998263	27.6011	cyr_090307_meja_05_2_bi4_p.01271.01271.2_29.038mins	1283.723770[0.024618];1283.687393[0.060995];1283.673462[0.074926];1283.658401[0.089987];1283.760162[-0.011774];1283.712524[0.035864];1283.756119[-0.007731];1283.687363[0.061025];1283.662231[0.086157]	QLFVKHIAEVT/;QIFKVHEGVVE/;RDFLHPRSLSG/;LFFTGCVKAGLE/;SAFILVHKVATV/;KFKLVXSITEG/;QRIAVGKIGTLE/;FLKEIHQEQI/;KQLFVHVNADN/	25.130000;22.790000;19.500000;18.330000;16.440000;16.130000;15.700000;13.750000;13.720000	0.003069;0.005260;0.011220;0.014689;0.022699;0.024378;0.026915;0.042170;0.000000	2.340000;3.290000;1.170000;1.890000;0.310000;0.430000;1.950000;0.030000;NA	0.000671807461;0.000391962774;0.000183757394;0.000140360473;0.000090833244;0.000084575548;0.000076602831;0.000048892790;0.000048556215	0.002919;0.001703;0.000798;0.000610;0.000395;0.000367;0.000333;0.000212;0.000211
query3534	633.335	1264.66	2	1264.62	0.037648	M	EGVETFDIDLK	E	82	28	38			60.28	1	0	Solyc05g055310.2.1	31.4	0.997741	26.46	cyr_090307_meja_05_2_bi8_p.01831.01831.2_40.932mins	1264.624069[0.032277];1264.589508[0.066838];1264.652573[0.003773];1264.608124[0.048222];1264.563507[0.092839];1264.574066[0.082280];1264.666306[-0.009960];1264.667938[-0.011592];1264.582993[0.073353]	NNWTFFPVLQ/;SNAAATSSTTNQL/;CIFWLDIDIK/;REETQMQLSK/Oxidation (M)[000000100000];MANTGKHVSIQ/Phospho (ST)[0000000002000];KTSSXFLDLQ/Phospho (ST)[000020000000];SKAKTFDIQDL/;TLAETLSPIKI/Phospho (ST)[0000000200000];SMRQGSGAQLSQ/Oxidation (M)[00100000000000]	28.880000;27.310000;24.260000;24.020000;22.060000;21.560000;20.330000;19.400000;19.370000	0.001294;0.001858;0.003750;0.003963;0.006223;0.006982;0.009268;0.011482;0.000000	1.570000;3.050000;0.240000;1.960000;0.500000;1.230000;0.930000;0.030000;NA	0.000722799129;0.000503521037;0.000249469594;0.000236057400;0.000150320295;0.000133973104;0.000100929383;0.000081473734;0.000080912873	0.003140;0.002187;0.001084;0.001025;0.000653;0.000582;0.000438;0.000354;0.000351
query5690	494.575	1480.7	3	1480.75	-0.041727	C	APHQGAGMVGKVTVN	-	171	156	170	Oxidation (M)	[00000000100000000]	50.76	1	0	Solyc04g082010.1.1	33.76	0.997662	26.3116	cyr_090307_meja_05_2_bi3_p.01081.01081.3_23.870mins	1480.684128[0.019812];1480.772415[-0.068475];1480.772415[-0.068475];1480.693619[0.010321];1480.685760[0.018180];1480.753815[-0.049875];1480.709244[-0.005304];1480.672867[0.031073];1480.678558[0.025382]	DCRGGAGYGISGVRGG/;KATAIVNSGLLLMA/Phospho (ST)[0000000020000000];KATALVNSGLLLMA/Phospho (ST)[0000000020000000];ITHQGRRVTYGN/Phospho (ST)[00200000000000];CPRQNSGVKVSQV/Phospho (ST)[000000200000000];DTKLIDVGVISKN/Phospho (ST)[002000000000000];FAGARGGSMXAEAVN/Oxidation (M)[00000000010000000];FAGARGGSMXAEAVN/Oxidation (M)[00000000010000000];TVGMNVFKTFKX/Oxidation (M) Phospho (ST)[00001000020000]	17.000000;16.020000;16.020000;15.090000;14.570000;13.700000;13.360000;13.360000;13.290000	0.019953;0.025003;0.025003;0.030974;0.034914;0.042658;0.046132;0.046132;0.000000	0.980000;0.000000;0.930000;0.520000;0.870000;0.340000;0.000000;0.070000;NA	0.000419742983;0.000334952671;0.000334952671;0.000270385529;0.000239874148;0.000196328543;0.000181544646;0.000181544646;0.000178641948	0.001823;0.001455;0.001455;0.001174;0.001042;0.000853;0.000789;0.000789;0.000776
query2480	582.318	1162.62	2	1162.62	0.001118	K	RLATSGANFAR	A	164	99	109			52.93	1	0	Solyc08g013670.2.1	34.41	0.99765	26.289	cyr_090307_meja_05_2_bi4_p.01120.01120.2_25.068mins	1162.576416[0.045384];1162.643143[-0.021343];1162.704681[-0.082881];1162.553589[0.068211];1162.573059[0.048741];1162.557800[0.064000];1162.551285[0.070515];1162.576431[0.045369];1162.565216[0.056584]	RIEEIMSNR/Oxidation (M)[00000010000];RLPQHRSNR/;RHVNGLKALR/;RLTVEYFR/Phospho (ST)[0002000000];ENPTHPIEAR/;EQASIQSSSAR/;DRSVQANMAR/Oxidation (M)[000000001000];KISIQSNCDR/;RSPTCESTALV/	18.520000;18.520000;18.370000;17.810000;17.620000;16.520000;15.620000;14.840000;13.330000	0.014060;0.014060;0.014555;0.016558;0.017298;0.022284;0.027416;0.032810;0.000000	0.000000;0.150000;0.560000;0.190000;1.100000;0.900000;0.780000;1.510000;NA	0.000361391665;0.000361391665;0.000349122735;0.000306886745;0.000293750173;0.000228022725;0.000185343829;0.000154873863;0.000109390128	0.001570;0.001570;0.001516;0.001333;0.001276;0.000990;0.000805;0.000673;0.000475
query5281	717.916	1433.82	2	1433.8	0.014761	L;L	LSIAVGLPNIGPHF	E;E	839	540	553			55.29	0	0	Solyc03g121540.2.1;Solyc06g062580.2.1	30.47	0.997556	26.1198	cyr_090307_meja_05_2_bi3_p.02079.02079.2_49.883mins	1433.748260[0.069586];1433.776596[0.041250];1433.857895[-0.040049];1433.795212[0.022634];1433.779968[0.037878];1433.811905[0.005941];1433.752747[0.065099];1433.753067[0.064779];1433.751434[0.066412]	IISAVGCCALRKSN/;SLLGLGLFLSNVDS/;DRLRIGGIPGPRK/;LISGIGLGAVKFEM/;LVMVKIEVSVTSN/Oxidation (M)[000100000000000];KKGARLGKISLSP/Phospho (ST)[000000000000200];GKKRKFHAEGYN/;ELAGLAVGATILLN/Phospho (ST)[0000000000200000];DFGSAKVLVKGEAN/	24.820000;21.640000;20.050000;17.380000;16.990000;16.730000;16.620000;16.180000;15.850000	0.003296;0.006855;0.009886;0.018281;0.019999;0.021232;0.021777;0.024099;0.000000	3.180000;1.590000;2.670000;0.390000;0.260000;0.110000;0.440000;0.330000;NA	0.000895235872;0.000430464634;0.000298495285;0.000161412616;0.000147549410;0.000138975254;0.000135499432;0.000122443991;0.000113484742	0.003890;0.001870;0.001297;0.000701;0.000641;0.000604;0.000589;0.000532;0.000493
query11136	984.46	1966.91	2	1966.93	-0.021144	G	GDDGSLAFIPGNFSVSAGEK	I	171	78	97			54.07	1	0	Solyc04g082010.1.1	29.82	0.997206	25.5376	cyr_090307_meja_05_2_bi4_p.01873.01873.2_44.732mins	1966.961090[-0.054988];1967.002487[-0.096385];1966.933578[-0.027476];1966.948822[-0.042720];1966.945877[-0.039775];1966.963409[-0.057307];1966.989639[-0.083537];1966.924667[-0.018565];1966.923981[-0.017879]	EFLEPFLPRQLNACAGY/;CCPKIAFISLLKLVPEN/Phospho (ST)[0000000002000000000];IQLSGRGHYLMSPQSIT/Phospho (ST)[0000200000000000000];KRRKQSMPIFGTYEF/Phospho (ST)[00000020000000000];GDRLCALFTDTANVPDFL/;KETWAFITWIVFAIY/Phospho (ST)[00000000200000000];IGQVFSMLPGFSAELMPK/Oxidation (M)[00000000000000001000];SVWVSGFLYALVPIVSA/2 Phospho (ST)[0200000000000000200];KMEVGAELSVKKTFLQ/2 Phospho (ST)[000000000200020000]	24.250000;19.680000;19.640000;16.660000;16.650000;16.610000;16.460000;16.140000;16.070000	0.003758;0.010765;0.010864;0.021577;0.021627;0.021827;0.022594;0.024322;0.000000	4.570000;0.040000;2.980000;0.010000;0.040000;0.150000;0.320000;0.070000;NA	0.001039405116;0.000362898230;0.000359571159;0.000181044297;0.000180627907;0.000178971901;0.000172895962;0.000160614537;0.000158046488	0.004516;0.001576;0.001562;0.000786;0.000785;0.000777;0.000751;0.000698;0.000686
query6665	792.477	1582.94	2	1582.92	0.015417	K	VQLILNHVIPKFY	T	248	104	116			52.84	1	0	Solyc07g053540.1.1	31.87	0.996887	25.0677	cyr_090307_meja_05_2_bi3_p.01953.01953.2_46.591mins	1582.884750[0.054190];1583.009552[-0.070612];1582.861496[0.077444];1582.842712[0.096228];1582.904236[0.034704];1582.862000[0.076940];1583.017410[-0.078470];1582.884750[0.054190];1582.904251[0.034689]	DKYLGLKLVSRLV/Phospho (ST)[000000000020000];KVLIILLTLAVAIMG/Oxidation (M)[00000000000000100];NLILMGFKIGLMYA/;RATTHQAQLITSLSG/;QPLSKVITSRLIND/;KVLTIQPHIDPHW/;ARVVKLSYIPLVLL/;KVIDLNTHLKLPL/Phospho (ST)[000000020000000];KPGLSALVTGGASGIGKA/	20.970000;19.760000;18.920000;18.730000;17.640000;16.460000;16.400000;16.220000;16.070000	0.007998;0.010568;0.012823;0.013397;0.017219;0.022594;0.022909;0.023878;0.000000	1.210000;0.840000;0.190000;1.090000;1.180000;0.060000;0.180000;0.150000;NA	0.000648105590;0.000490507630;0.000404246034;0.000386941907;0.000301054946;0.000229427656;0.000226279790;0.000217092974;0.000209722858	0.002816;0.002131;0.001756;0.001681;0.001308;0.000997;0.000983;0.000943;0.000911
query5055	705.903	1409.79	2	1409.79	-0.000606	E	FLSKVDYLLGKQ	A	259	152	163			54.1	1	0	Solyc07g044860.2.1	31.55	0.996751	24.8819	cyr_090307_meja_05_2_bi3_p.01658.01658.2_38.915mins	1409.766190[0.025044];1409.766190[0.025044];1409.799026[-0.007792];1409.787827[0.003407];1409.716660[0.074574];1409.750366[0.040868];1409.713989[0.077245];1409.751419[0.039815];1409.829865[-0.038631]	MAIVMKYIIALE/Oxidation (M)[01000000000000];MAIVMKYIIALE/Oxidation (M)[00000100000000];SATLPRLNILAQN/;QRLPQDDLLVLT/;KASEVLKDKALE/Phospho (ST)[00020000000000];KKRKQSVSXNQ/Phospho (ST)[0000002000000];KKRKQSVSXNQ/Phospho (ST)[0000002000000];QLRIPLDAAGDEL/;LFIALKSVILIT/Phospho (ST)[00000002000000]	22.550000;20.460000;20.300000;20.240000;18.420000;18.280000;18.280000;18.280000;17.970000	0.005559;0.008995;0.009333;0.009462;0.014388;0.014859;0.014859;0.014859;0.000000	2.090000;0.160000;0.060000;1.820000;0.140000;0.000000;0.000000;0.310000;NA	0.000697567920;0.000431108415;0.000415514802;0.000409813726;0.000269517208;0.000260967545;0.000260967545;0.000260967545;0.000242988936	0.003031;0.001873;0.001805;0.001780;0.001171;0.001134;0.001134;0.001134;0.001055
query9142	892.982	1783.95	2	1783.97	-0.017527	K	RTEEQALSLNIPLSTL	D	294	118	133			51.57	1	0	Solyc01g097460.2.1	30.24	0.995404	23.3767	cyr_090307_meja_05_2_bi4_p.02001.02001.2_48.065mins	1783.938980[0.011434];1783.959717[-0.009303];1783.959717[-0.009303];1783.965469[-0.015055];1783.896835[0.053579];1783.972000[-0.021586];1783.860260[0.090154];1783.886948[0.063466];1783.932434[0.017980]	MKEVVEVNXNILPSVD/;TYRIVRVSSLPLSTI/Phospho (ST)[00000000020000000];TYRIVRVSSLPLSTI/Phospho (ST)[00000000200000000];TTAGKAIVKSKGCFIFN/;VAGLSSLSISLSLGSNSL/Phospho (ST)[00000000000000000200];IPTISKDGGSWLLSPTI/;XGGFGGGLGGGGGGVGGGLGGLGGG/;SAFKNLGKSIAVGEAGVG/Phospho (ST)[02000000000000000000];MREILNMPLVQDLVN/	21.330000;20.230000;20.230000;18.690000;17.680000;16.910000;16.810000;16.530000;16.170000	0.007362;0.009484;0.009484;0.013521;0.017061;0.020370;0.020845;0.022233;0.000000	1.100000;0.000000;1.540000;1.010000;0.770000;0.100000;0.280000;0.360000;NA	0.000941888726;0.000731138407;0.000731138407;0.000512860910;0.000406442953;0.000340407875;0.000332659246;0.000311888670;0.000287077793	0.004092;0.003176;0.003176;0.002228;0.001766;0.001479;0.001445;0.001355;0.001247
query16163	1259.1	2516.18	2	2516.19	-0.015529	E	FYVITWESPKEQIFEMPTGGAA	I	209	97	118	Oxidation (M)	[000000000000000010000000]	39.52	1	0	Solyc06g054260.1.1	28.48	0.995013	23.0215	cyr_090307_meja_05_2_bi4_p.01951.01951.2_46.768mins	2516.174088[0.003742];2516.142990[0.034840];2516.080978[0.096852];2516.087296[0.090534];2516.209442[-0.031612];2516.094711[0.083119];2516.087296[0.090534];2516.097229[0.080601];2516.087296[0.090534]	VFLLDGVQSMAGAGESGVISYENAS/Oxidation (M)[000000000010000000000000000];FTTLLPYQFQHLSSFNLIST/2 Phospho (ST)[0000000000000000000220];TPSKAMLPLQAPSPFMPFTYT/2 Oxidation (M) 2 Phospho (ST)[02020010000000001000000];TYQVLRSDEVEFEVISAERS/2 Phospho (ST)[0000000200000000000020];IGGMVLDVNAISSIHANPRTTTPG/Oxidation (M) Phospho (ST)[00001000000000000000002000];QDNDFLPLVATPMLDQPSLLN/Oxidation (M) 2 Phospho (ST)[0…	11.040000;7.300000;6.960000;6.770000;5.830000;5.550000;5.120000;5.080000;5.040000	0.078705;0.186209;0.201372;0.210378;0.261216;0.278612;0.307610;0.310456;0.000000	3.740000;0.340000;0.190000;0.940000;0.280000;0.430000;0.040000;0.040000;NA	0.001411980581;0.000596799875;0.000551859755;0.000528236886;0.000425430600;0.000398867567;0.000361267359;0.000357955240;0.000354673486	0.006136;0.002593;0.002397;0.002295;0.001848;0.001733;0.001569;0.001555;0.001541
query3794	643.858	1285.7	2	1285.66	0.04549	D	PVGNWIGQRPY	-	160	149	159			53.37	1	0	Solyc00g174340.1.1	29.39	0.994686	22.7458	cyr_090307_meja_05_2_bi10_p.01776.01776.2_36.844mins	1285.696487[0.005757];1285.643143[0.059101];1285.633636[0.068608];1285.678558[0.023686];1285.725494[-0.023250];1285.658768[0.043476];1285.633636[0.068608];1285.681229[0.021015];1285.728851[-0.026607]	PRNWLMVKNI/Oxidation (M)[000000100000];PKKVSLVSHDP/Phospho (ST)[0000020000000];PVGVNSTSANMPL/;PVGGGSRKNRRC/;PVGNVHALPLXN/;PVNENLMELLV/Oxidation (M)[0000000100000];PVGNSLPLSQGSM/;PRRGSIEMLEV/;PRRGSIVMLNK/Oxidation (M)[0000000010000]	23.980000;23.380000;21.860000;20.240000;20.100000;19.860000;19.680000;19.320000;17.500000	0.003999;0.004592;0.006516;0.009462;0.009772;0.010328;0.010765;0.011695;0.000000	0.600000;1.520000;1.620000;0.140000;0.240000;0.180000;0.360000;1.820000;NA	0.001144685026;0.000996978979;0.000702564177;0.000483822434;0.000468474549;0.000443288027;0.000425290813;0.000391458747;0.000257445913	0.004974;0.004332;0.003052;0.002102;0.002035;0.001926;0.001847;0.001700;0.001118
query5640	737.894	1473.77	2	1473.79	-0.017085	S	MTNLNLPSIFVPL	V	73	37	49	Oxidation (M)	[010000000000000]	51.89	1	0	Solyc01g007350.2.1	30.89	0.994442	22.551	cyr_090307_meja_05_2_bi3_p.02372.02372.2_57.539mins	1473.820450[-0.047404];1473.676102[0.096944];1473.768829[0.004217];1473.702103[0.070943];1473.746368[0.026678];1473.706802[0.066244];1473.706802[0.066244];1473.719009[0.054037];1473.709961[0.063085]	NWSGVRYRKVLP/;GLCGINKMVSFPL/Oxidation (M) Phospho (ST)[000000001020000];QLGARITFGGQVNN/;MPTVDEVAASSAPIS/;LDVSVKFSDTHLN/;EVVMMSRVKHEN/Oxidation (M)[00000100000000];EVVMMSRVKHEN/Oxidation (M)[00001000000000];LDVTLLVTXIYN/Phospho (ST)[00000000200000];LDVTNQPNAFLEN/	21.000000;20.590000;20.210000;19.460000;19.380000;19.370000;19.370000;19.300000;19.300000	0.007943;0.008730;0.009528;0.011324;0.011535;0.011561;0.011561;0.011749;0.000000	0.410000;0.380000;0.750000;0.080000;0.010000;0.000000;0.070000;0.000000;NA	0.000810176310;0.000737190177;0.000675428746;0.000568302465;0.000557929776;0.000556646573;0.000556646573;0.000547746410;0.000547746410	0.003520;0.003203;0.002934;0.002469;0.002424;0.002418;0.002418;0.002379;0.002379
query5047	704.926	1407.84	2	1407.84	-0.007686	E;E;E;E;E;E;E;E;E;E;E	IQTAVRLVLPGEL	A;A;A;A;A;A;A;A;A;A;A	135	104	116			46.42	0	0	Solyc02g038690.1.1;Solyc03g071620.1.1;Solyc05g055440.1.1;Solyc06g005390.1.1;Solyc06g074780.1.1;Solyc06g074790.1.1;Solyc06g075800.1.1;Solyc11g007920.1.1;Solyc11g007930.1.1;Solyc11g066430.1.1;Solyc12g013510.1.1	29.31	0.993223	21.6894	cyr_090307_meja_05_2_bi5_p.01936.01936.2_46.233mins	1407.870087[-0.032833];1407.781219[0.056035];1407.759888[0.077366];1407.759888[0.077366];1407.842422[-0.005168];1407.833694[0.003560];1407.906464[-0.069210];1407.863556[-0.026302];1407.892517[-0.055263]	STLLLVIIPQAVAA/;TGCTILVLLLVAL/Phospho (ST)[020000000000000];AVARRDLVLKTS/Phospho (ST)[00000000000020];AVARRDLVLKTS/Phospho (ST)[00000000000200];KLVHKFKMLPAP/;ELLSIAVGLPNIGL/;KILTGLAIALIXVP/;STLLLLVRLMHL/;IRLEKIKLPGKN/	17.110000;16.130000;15.920000;15.920000;14.410000;14.220000;14.150000;13.980000;13.730000	0.019454;0.024378;0.025586;0.025586;0.036224;0.037844;0.038459;0.039994;0.000000	0.980000;0.210000;0.000000;1.510000;0.190000;0.070000;0.170000;0.250000;NA	0.001164251066;0.000929066165;0.000885210678;0.000885210678;0.000625239841;0.000598475869;0.000588906902;0.000566300108;0.000534621776	0.005059;0.004037;0.003846;0.003846;0.002716;0.002600;0.002558;0.002460;0.002322
query15424	1216.52	2431.02	2	2431.04	-0.019968	K	IEKFQSEEQQQTEDELQDK	I	222	45	63	Phospho (ST)	[000000200000000000000]	51.6	1	0	caseinbeta	22.82	0.992976	21.5339	cyr_090307_meja_05_2_bi4_p.01321.01321.2_30.333mins	2431.042770[-0.019968];2431.120285[-0.097483];2430.953903[0.068899];2430.970581[0.052221];2431.120926[-0.098124];2431.120926[-0.098124];2431.120926[-0.098124];2430.987778[0.035024];2430.987778[0.035024]	IEKFQSEEQQQTEDELQDK/Phospho (ST)[000000000000200000000];YAGDRVAVVVADSQMSADVAART/Phospho (ST)[0000000000000000200000000];DVEKQTMSVYNDVDELKEN/Oxidation (M) 2 Phospho (ST)[000000212000000000000];SSERRKLNEDTEDEKIDK/3 Phospho (ST)[02200000000200000000];KIGFSIHRTSWYDEEGGIAVS/Phospho (ST)[00000000002000000000000];KIGFSIHRTSWYDEEGGIAVS/Phospho (ST)[00000000020000000000000];KIGFSIHRTSWYDEEGGIAVS/Phospho (…	28.780000;18.570000;16.020000;15.630000;13.850000;13.850000;13.850000;13.630000;13.630000	0.001324;0.013900;0.025003;0.027353;0.041210;0.041210;0.041210;0.043351;0.000000	10.210000;2.550000;0.390000;1.780000;0.000000;0.000000;0.220000;0.000000;NA	0.005187266441;0.000494240757;0.000274750541;0.000251153107;0.000166701135;0.000166701135;0.000166701135;0.000158466898;0.000158466898	0.022587;0.002147;0.001193;0.001091;0.000724;0.000724;0.000724;0.000688;0.000688
query6409	784.399	1566.78	2	1566.78	0.006703	D	LLNAAGETYSVTLSE	K	171	133	147			48.05	1	0	Solyc04g082010.1.1	28.2	0.992348	21.1622	cyr_090307_meja_05_2_bi3_p.01728.01728.2_40.742mins	1566.721848[0.062550];1566.740494[0.043904];1566.726898[0.057500];1566.721848[0.062550];1566.787888[-0.003490];1566.696686[0.087712];1566.809189[-0.024791];1566.758209[0.026189];1566.758209[0.026189]	YTTTFVLNSLISX/Phospho (ST)[000000000200000];FSIPVESVVVMPPA/Oxidation (M) Phospho (ST)[0000000200010000];SLMEANSNLMLLSE/Oxidation (M)[0001000000000000];YTTTFVLNSLISX/Phospho (ST)[000020000000000];DRSGIRISRVLSE/Phospho (ST)[000000002000000];FSNPKSGPEPVLSE/Phospho (ST)[0000002000000000];MSLAAISPLTKINL/Oxidation (M) Phospho (ST)[0100000200000000];LFSSITKYSIISE/Phospho (ST)[000000000200000];LFSSITKYSI…	19.850000;18.150000;18.150000;18.150000;16.060000;16.060000;16.060000;15.940000;15.940000	0.010351;0.015311;0.015311;0.015311;0.024774;0.024774;0.024774;0.025468;0.000000	1.700000;0.000000;0.000000;2.090000;0.000000;0.000000;0.120000;0.000000;NA	0.001501979441;0.001015462729;0.001015462729;0.001015462729;0.000627572620;0.000627572620;0.000627572620;0.000610469524;0.000610469524	0.006528;0.004412;0.004412;0.004412;0.002726;0.002726;0.002726;0.002652;0.002652
query6307	776.886	1551.76	2	1551.74	0.019216	A	RTSAFTFGLVYGSM	K	54	19	32	Oxidation (M)	[0000000000000010]	46.03	1	0	Solyc01g110540.2.1	28.22	0.992002	20.97	cyr_090307_meja_05_2_bi5_p.01885.01885.2_44.916mins	1551.758575[-0.000177];1551.850815[-0.092417];1551.697006[0.061392];1551.763931[-0.005533];1551.660660[0.097738];1551.777206[-0.018808];1551.772171[-0.013773];1551.664017[0.094381];1551.760925[-0.002527]	YVKTLEKVTTGSF/Phospho (ST)[000020000000000];KTPQDIKAVVVPEE/;TKYVRIEAYNDT/Phospho (ST)[02000000000000];KTYVFRHLYVF/Phospho (ST)[0020000000000];DHGFQPISVVSASE/Phospho (ST)[0000000000020000];DKMVLSPLVPVQF/Phospho (ST)[000000200000000];TNAWVLPEGKYGAF/;DGHTLQCLLVSASE/Phospho (ST)[0000000000020000];PKTKSYYLFDGYA/	17.810000;16.860000;16.610000;16.220000;14.470000;14.000000;14.000000;13.880000;13.790000	0.016558;0.020606;0.021827;0.023878;0.035727;0.039811;0.039811;0.040926;0.000000	0.950000;0.250000;0.390000;1.750000;0.470000;0.000000;0.120000;0.090000;NA	0.001494556701;0.001200915350;0.001133737198;0.001036364185;0.000692647699;0.000621601990;0.000621601990;0.000604661610;0.000592259991	0.006496;0.005219;0.004927;0.004503;0.003009;0.002700;0.002700;0.002627;0.002573
query3524	633.308	1264.6	2	1264.62	-0.015407	A	FTFGLVYGSMK	L	54	23	33	Oxidation (M)	[0000000000100]	52.22	1	0	Solyc01g110540.2.1	23.33	0.991456	20.6835	cyr_090307_meja_05_2_bi11_p.02040.02040.2_41.748mins	1264.667969[-0.067165];1264.667969[-0.067165];1264.640686[-0.039882];1264.541061[0.059743];1264.541061[0.059743];1264.667969[-0.067165];1264.631592[-0.030788];1264.631592[-0.030788];1264.541046[0.059758]	LAGLIVSPTLTT/Phospho (ST)[00000000020000];LAGLIVSPTLTT/Phospho (ST)[00000002000000];MKLIEVMAPTT/2 Oxidation (M)[0100000100000];TFITSCIAQTT/Phospho (ST)[0000020000000];TFITSCIAQTT/Phospho (ST)[0000200000000];LAGLIVSPTLTT/Phospho (ST)[00000000000200];KEPITVTVPTT/Phospho (ST)[0000000200000];KEPITVTVPTT/Phospho (ST)[0000020000000];LTFISSISNCT/Phospho (ST)[0000002000000]	28.890000;23.550000;21.290000;18.110000;18.110000;18.030000;15.600000;15.600000;15.520000	0.001291;0.004416;0.007430;0.015453;0.015453;0.015740;0.027542;0.027542;0.000000	5.340000;2.260000;3.180000;0.000000;0.080000;2.430000;0.000000;0.080000;NA	0.004605465586;0.001346708314;0.000800338191;0.000384834094;0.000384834094;0.000377810081;0.000215910390;0.000215910390;0.000211969581	0.020047;0.005853;0.003477;0.001672;0.001672;0.001641;0.000938;0.000938;0.000921
query7290	817.409	1632.8	2	1632.78	0.024801	A	YAVGASFKGTDFSNAV	L	234	152	167			49.05	1	0	Solyc03g082890.2.1	27.24	0.990889	20.4044	cyr_090307_meja_05_2_bi4_p.01654.01654.2_39.030mins	1632.791290[0.011908];1632.714859[0.088339];1632.745377[0.057821];1632.800201[0.002997];1632.814133[-0.010935];1632.712845[0.090353];1632.739594[0.063604];1632.825348[-0.022150];1632.710663[0.092535]	NFTAGIVGLGGSKVSF/Phospho (ST)[000000000000000200];TSSVSSSSSSSLSVNSM/;MWQPATPQESQTIT/Oxidation (M)[0100000000000000];AGGMTRHTRTSKSDL/Oxidation (M)[00001000000000000];SRSVPVLTNMSQVDT/;DDSSGHVHSYSVRST/;RTIQLEYTDAKES/Phospho (ST)[002000000000000];NLGRCSIAVNGKSVDT/;FSVIGLCVADSQVDT/Phospho (ST)[00200000000000000]	21.810000;20.760000;20.360000;20.320000;18.010000;17.200000;16.990000;16.590000;16.060000	0.006592;0.008395;0.009204;0.009290;0.015812;0.019055;0.019999;0.021928;0.000000	1.050000;0.400000;0.040000;2.310000;0.810000;0.210000;0.400000;0.530000;NA	0.001870790140;0.001469011083;0.001339754031;0.001327471092;0.000779875132;0.000647179977;0.000616630600;0.000562373791;0.000497765821	0.008132;0.006385;0.005822;0.005769;0.003388;0.002812;0.002679;0.002443;0.002162
query5827	750.357	1498.7	2	1498.71	-0.010662	Q;Q	APQEKGFAAFATDF	L;L	387	77	90			48.58	0	0	Solyc11g062130.1.1;Solyc11g062190.1.1	27.78	0.990398	20.1763	cyr_090307_meja_05_2_bi5_p.01896.01896.2_45.213mins	1498.708603[-0.010021];1498.672226[0.026356];1498.744995[-0.046413];1498.664993[0.033589];1498.660126[0.038456];1498.677856[0.020726];1498.716446[-0.017864];1498.658295[0.040287];1498.771774[-0.073192]	LHDSHLVTSXTDM/Oxidation (M)[000000000000010];LHDSHLVTSXTDM/Oxidation (M)[000000000000010];GVVGLKSTYGRTDM/Oxidation (M)[0000000000000010];DVFPPEYKAATDM/Oxidation (M)[000000000000010];SITAFKMFGITGM/Oxidation (M) Phospho (ST)[020000000000010];ISTKTMALSAAYF/Oxidation (M) Phospho (ST)[002000100000000];ESDRRKAGFADTF/;DTHGTNRKHATDM/Oxidation (M)[000000000000010];ISTALMTIGIAIVT/Oxidation (M) Phospho (ST)…	20.800000;20.800000;20.310000;18.990000;18.260000;17.610000;17.230000;16.770000;16.720000	0.008318;0.008318;0.009311;0.012618;0.014928;0.017338;0.018923;0.021038;0.000000	0.000000;0.490000;1.320000;0.730000;0.650000;0.380000;0.460000;0.050000;NA	0.001651237983;0.001651237983;0.001475059946;0.001088452974;0.000920046272;0.000792154092;0.000725787811;0.000652844380;0.000645371333	0.007177;0.007177;0.006411;0.004730;0.003998;0.003442;0.003153;0.002836;0.002804
query3635	637.409	1272.8	2	1272.79	0.011663	Q	KVQLILNHVIP	K	248	103	113			39.38	1	0	Solyc07g053540.1.1	26.26	0.989927	19.9684	cyr_090307_meja_05_2_bi4_p.01745.01745.2_41.398mins	1272.755386[0.048056];1272.714981[0.088461];1272.737640[0.065802];1272.791763[0.011679];1272.707779[0.095663];1272.737625[0.065817];1272.744171[0.059271];1272.744141[0.059301];1272.707748[0.095694]	QINLNIIHLPV/;DLVRGRLESTK/;KKACHLKVFTV/;ILTHPKLKNLP/;DLVHIVYSLSK/;KAKHAMFVTLK/;LXVQAAVLVFIS/;LNKILLTPAYQ/;QKAAYAIDAIPL/	13.120000;10.180000;9.960000;9.950000;9.250000;9.140000;8.900000;8.460000;7.850000	0.048753;0.095940;0.100925;0.101158;0.118850;0.121899;0.128825;0.142561;0.000000	2.940000;0.220000;0.010000;0.700000;0.110000;0.240000;0.440000;0.610000;NA	0.002342087569;0.001190153914;0.001131366015;0.001128763946;0.000960733930;0.000936705627;0.000886345673;0.000800945801;0.000695990207	0.010183;0.005172;0.004916;0.004905;0.004174;0.004070;0.003851;0.003480;0.003024
query3128	617.808	1233.6	2	1233.57	0.029669	S	SLSVDAGVDEKD	A	172	74	85			49.76	1	0	Solyc01g087520.2.1	25.12	0.98986	19.9397	cyr_090307_meja_05_2_bi5_p.01275.01275.2_28.982mins	1233.681625[-0.079477];1233.554688[0.047460];1233.583725[0.018423];1233.510071[0.092077];1233.653976[-0.051828];1233.606354[-0.004206];1233.700241[-0.098093];1233.589371[0.012777];1233.608841[-0.006693]	SLISTIASVTATA/;EEKDKVPMNE/Oxidation (M)[000000001000];ISVSDDSTRTPG/;KFMTNLDAQA/Oxidation (M) Phospho (ST)[000120000000];LSSVWRSMGIV/;VTWDIKECIQ/;KMSLXSLVAISL/Oxidation (M)[00100000000000];SIADDIPTPLI/Phospho (ST)[0000000020000];ISSVNIEETDK/	24.640000;21.250000;20.660000;20.090000;19.900000;18.630000;17.770000;17.100000;16.490000	0.003436;0.007499;0.008590;0.009795;0.010233;0.013709;0.016711;0.019498;0.000000	3.390000;0.590000;0.570000;0.190000;1.270000;0.860000;0.670000;0.610000;NA	0.003044905847;0.001394998909;0.001217794107;0.001068006432;0.001022289425;0.000763086672;0.000625999330;0.000536505117;0.000466201716	0.013244;0.006063;0.005292;0.004641;0.004442;0.003315;0.002720;0.002331;0.002025
query9979	931.436	1860.86	2	1860.89	-0.028788	E	NNSLSYEISFTSKRSE	D	777	721	736			46.94	1	0	Solyc06g062950.1.1	25.3	0.986985	18.8556	cyr_090307_meja_05_2_bi7_p.01547.01547.2_35.762mins	1860.863342[-0.006800];1860.853149[0.003393];1860.784866[0.071676];1860.836212[0.020330];1860.836212[0.020330];1860.836700[0.019842];1860.900635[-0.044093];1860.929169[-0.072627];1860.815598[0.040944]	DLSKLEMAALWRYW/Phospho (ST)[0002000000000000];DLSMTVVKSLVMLIH/Oxidation (M) 2 Phospho (ST)[00021200000000000];FTAEEFHRTLGPSPL/2 Phospho (ST)[00000000020002000];MSSMEKIRSLETGSPI/Oxidation (M) Phospho (ST)[000010000000002000];MSSMEKIRSLETGSPI/Oxidation (M) Phospho (ST)[010000000000002000];NNSKVGGSSKYGANNVSV/Phospho (ST)[00020000000000000000];NEFGFPKTHPTTNTSIA/;VESISAFMGTLKPGTPGPG/Oxidation (M)[0000…	21.640000;18.570000;18.570000;18.570000;18.570000;18.250000;17.900000;17.130000;15.800000	0.006855;0.013900;0.013900;0.013900;0.013900;0.014962;0.016218;0.019364;0.000000	3.070000;0.000000;0.000000;0.000000;0.320000;0.350000;0.770000;1.330000;NA	0.002912800019;0.001436516666;0.001436516666;0.001436516666;0.001436516666;0.001334475697;0.001231149148;0.001031123462;0.000759120411	0.012669;0.006243;0.006243;0.006243;0.006243;0.005799;0.005350;0.004480;0.003298
query15418	811.111	2430.31	3	2430.33	-0.020607	Q	KVQLILNHVIPKFYTFDDLQ	T	248	103	122			43.83	1	0	Solyc07g053540.1.1	25.62	0.986781	18.7879	cyr_090307_meja_05_2_bi3_p.01968.01968.3_46.994mins	2430.409729[-0.099220];2430.329102[-0.018593];2430.309494[0.001015];2430.210648[0.099861];2430.303772[0.006737];2430.328674[-0.018165];2430.366180[-0.055671];2430.333160[-0.022651];2430.257706[0.052803]	KLTNFSLLKLATSSTAALPTLLQ/;DSLCAVVIDEDIIVTKSKLELK/;LNLYCLLLVICYWSFLLXLQ/;SSIKRLPLDCIVRESQSVLK/2 Phospho (ST)[0220000000000000000000];NFLTFLLVPIMATILIQFLQ/Oxidation (M) Phospho (ST)[0000000000010200000000];IRKKYDLKLQEVEATYLLK/Phospho (ST)[000000000000000200000];LVLSXLVSSVFTLSSITLTYLAG/;LVLSXLVSSVFTLSSITLTYLAG/Oxidation (M)[0000010000000000000000000];PSGVATRSMDRDVLFEEVPVVK/	18.210000;16.880000;16.880000;16.880000;14.750000;13.180000;13.050000;13.050000;13.030000	0.015101;0.020512;0.020512;0.020512;0.033497;0.048084;0.049545;0.049545;0.000000	1.330000;0.000000;0.000000;2.130000;1.570000;0.130000;0.000000;0.020000;NA	0.002705331964;0.001991684593;0.001991684593;0.001991684593;0.001219608841;0.000849611855;0.000824556774;0.000824556774;0.000820768280	0.011765;0.008658;0.008658;0.008658;0.005300;0.003691;0.003582;0.003582;0.003566
query10349	947.952	1893.89	2	1893.9	-0.010309	R;R	MVSAHASQQIYTRATNT	-;-	109	92	108	Oxidation (M)	[0100000000000000000]	45.28	0	0	Solyc02g069850.2.1;Solyc10g052660.1.1	22.5	0.985614	18.4206	cyr_090307_meja_05_2_bi4_p.01170.01170.2_26.372mins	1893.934189[-0.044199];1893.948090[-0.058100];1893.901917[-0.011927];1893.808060[0.081930];1893.875061[0.014929];1893.909348[-0.019358];1893.909348[-0.019358];1893.869431[0.020559];1893.967331[-0.077341]	FTRHATNMFKGVNKMP/Oxidation (M)[000000001000000000];KPHYSSKKLFEVMGMP/Oxidation (M)[000000000000010000];PDSIRQEIQKSAPKSM/Phospho (ST)[000000000000000200];FVFGNTQENATRLMNG/Oxidation (M) Phospho (ST)[000000000002001000];FSKVASQASKRLGQVE/2 Phospho (ST)[002000000200000000];VMPGLVAPNSVLRMSXI/Oxidation (M) Phospho (ST)[0010000000000002000];VMPGLVAPNSVLRMSXI/Oxidation (M) Phospho (ST)[0010000000200000000]…	22.780000;19.410000;16.790000;15.740000;14.550000;14.240000;14.240000;13.890000;13.800000	0.005272;0.011455;0.020941;0.026669;0.035075;0.037670;0.037670;0.040832;0.000000	3.370000;2.620000;1.050000;1.190000;0.310000;0.000000;0.350000;0.090000;NA	0.005542515573;0.002550979227;0.001395426358;0.001095738502;0.000833118776;0.000775723453;0.000775723453;0.000715660293;0.000700982090	0.024138;0.011093;0.006064;0.004761;0.003620;0.003370;0.003370;0.003109;0.003045
query1631	524.776	1047.54	2	1047.54	-0.00146	Q	GAGMVGKVTVN	-	171	160	170	Oxidation (M)	[0000100000000]	46.93	1	0	Solyc04g082010.1.1	22.6	0.985466	18.3761	cyr_090307_meja_05_2_bi4_p.01103.01103.2_24.632mins	1047.538269[-0.001429];1047.475006[0.061834];1047.501892[0.034948];1047.493637[0.043203];1047.499115[0.037725];1047.513107[0.023733];1047.574661[-0.037821];1047.596466[-0.059626];1047.476669[0.060171]	QGMVEKKNV/Oxidation (M)[00010000000];QGLSHLSLN/Phospho (ST)[00000002000];ANTNVGLMVN/Oxidation (M)[000000001000];KGFVKRMS/Oxidation (M) Phospho (ST)[0000000120];KRTRKTV/2 Phospho (ST)[000200200];KRMGEAQVN/Oxidation (M)[00010000000];KGKGMSLVVN/Oxidation (M)[000001000000];LTVVIFGSVN/;KGVGISKTX/2 Phospho (ST)[00000020200]	24.330000;18.470000;18.220000;17.870000;17.590000;17.210000;17.180000;16.870000;16.770000	0.003690;0.014223;0.015066;0.016331;0.017418;0.019011;0.019143;0.020559;0.000000	5.860000;0.250000;0.350000;0.280000;0.380000;0.030000;0.310000;0.100000;NA	0.005415537076;0.001404887452;0.001326299279;0.001223605818;0.001147206327;0.001051093943;0.001043858263;0.000971944650;0.000949820488	0.023583;0.006106;0.005764;0.005317;0.004985;0.004567;0.004536;0.004223;0.004127
query13136	1080	2157.98	2	2158	-0.014978	K	ISMSEEDLLNAAGETYSVTL	S	171	126	145	Oxidation (M)	[0001000000000000000000]	42.76	1	0	Solyc04g082010.1.1	25.74	0.985366	18.3464	cyr_090307_meja_05_2_bi3_p.02014.02014.2_48.184mins	2158.009979[-0.026239];2157.912842[0.070898];2157.912842[0.070898];2157.922333[0.061407];2158.005951[-0.022211];2158.038086[-0.054346];2158.038086[-0.054346];2158.038086[-0.054346];2158.038086[-0.054346]	TMVTELDLSDNSFSKGLTNS/;SYTVVSDKSCGGKLCIPEI/2 Phospho (ST)[020000000200000000000];SYTVVSDKSCGGKLCIPEI/2 Phospho (ST)[020000200000000000000];TMTLYPTIDSHILKAKS/3 Phospho (ST)[0000000200200000020];DSMVMLMEPKCRGLSGVLL/Phospho (ST)[000000000000000200000];CINLSLTPANLLSSISFQAS/Phospho (ST)[0000000000000000200000];CINLSLTPANLLSSISFQAS/Phospho (ST)[0000000000000020000000];CINLSLTPANLLSSISFQAS/Phospho (ST)[0…	17.020000;16.680000;16.680000;15.010000;14.690000;13.110000;13.110000;13.110000;11.580000	0.019861;0.021478;0.021478;0.031550;0.033963;0.048865;0.048865;0.048865;0.000000	0.340000;0.000000;1.670000;0.320000;1.580000;0.000000;0.000000;1.530000;NA	0.002627832323;0.002429951751;0.002429951751;0.001654236695;0.001536730285;0.001068064918;0.001068064918;0.001068064918;0.000750926880	0.011428;0.010566;0.010566;0.007190;0.006679;0.004641;0.004641;0.004641;0.003262
query13848	1116.61	2231.2	2	2231.11	0.093038	F;F	ASGSDENDVVVIGGGPGGYVAAIK	A;A	501	31	54			53.55	0	0	Solyc05g053300.2.1;Solyc12g099100.1.1	22.75	0.98498	18.2334	cyr_090307_meja_05_2_bi4_p.01739.01739.2_41.228mins	2231.157913[0.042135];2231.157913[0.042135];2231.157913[0.042135];2231.274979[-0.074931];2231.131958[0.068090];2231.114975[0.085073];2231.114975[0.085073];2231.257172[-0.057124];2231.163269[0.036779]	TTKSLIIGVLGTTEKKVQGV/2 Phospho (ST)[0020200000000000000000];TTKSLIIGVLGTTEKKVQGV/2 Phospho (ST)[0200200000000000000000];TTKSLIIGVLGTTEKKVQGV/2 Phospho (ST)[0220000000000000000000];VYRNGKDRGLVVDSKKIAXL/;GVLGSAYKAKMGNGMSVVVKR/Phospho (ST)[00000200000000000000000];SPLKAKSIRTLVVSMAAVGAG/Oxidation (M) 2 Phospho (ST)[02000000002000010000000];SPLKAKSIRTLVVSMAAVGAG/Oxidation (M) 2 Phospho (ST)[0200000200…	30.800000;30.800000;27.260000;22.820000;18.440000;18.310000;18.310000;18.270000;17.220000	0.000832;0.000832;0.001879;0.005224;0.014322;0.014757;0.014757;0.014894;0.000000	0.000000;3.540000;4.440000;4.380000;0.130000;0.000000;0.040000;1.050000;NA	0.005229107536;0.005229107536;0.002314342193;0.000832583065;0.000303687959;0.000294732191;0.000294732191;0.000292030070;0.000229312418	0.022769;0.022769;0.010063;0.003617;0.001319;0.001280;0.001280;0.001268;0.000996
query6833	534.333	1599.98	3	1599.94	0.033715	Q	PIAIFTINKVLMPK	E	416	317	330	Oxidation (M)	[0000000000001000]	36.86	1	0	Solyc10g005960.1.1	21.83	0.98457	18.1163	cyr_090307_meja_05_2_bi3_p.01914.01914.3_45.583mins	1599.909653[0.066262];1599.916824[0.059091];1599.876617[0.099298];1599.884491[0.091424];1599.894440[0.081475];1599.959961[0.015954];1599.878937[0.096978];1599.919540[0.056375];1599.886124[0.089791]	RLLGIFGLKTSANPN/;IQKRKSEKSNLRN/;IPAAKGRSISLACSLN/;GRIPNSRIGKLFEN/;PSSVKVKGSKIVGSGGGG/;PLLAALIQLVKTGYT/;ISNIKPKSLKFFV/Phospho (ST)[002000000000000];ALKSSASLSLPITGKQ/;SLKILNKRQIPPN/Phospho (ST)[020000000000000]	15.030000;9.100000;9.020000;8.770000;7.420000;7.260000;5.800000;5.140000;4.250000	0.031405;0.123027;0.125314;0.132739;0.181134;0.187932;0.263027;0.306196;0.000000	5.930000;0.080000;0.250000;1.350000;0.160000;1.460000;0.660000;0.890000;NA	0.006460208641;0.001649098301;0.001618998865;0.001528433487;0.001120073557;0.001079559403;0.000771341227;0.000662592544;0.000539816984	0.028147;0.007168;0.007037;0.006643;0.004867;0.004691;0.003351;0.002879;0.002345
query4434	673.866	1345.72	2	1345.7	0.020467	L	VEEDKLELATSL	L	483	318	329			54.57	1	0	Solyc07g066610.2.1	23.29	0.983236	17.7563	cyr_090307_meja_05_2_bi5_p.01700.01700.2_40.099mins	1345.697662[0.020452];1345.669998[0.048116];1345.752670[-0.034556];1345.734940[-0.016826];1345.631226[0.086888];1345.631226[0.086888];1345.654755[0.063359];1345.708893[0.009221];1345.695175[0.022939]	GLDDISLELATSL/;MVLEKGNAIADW/;TMSSIIVELQLL/;PCTVTVLLMLAGL/Oxidation (M)[000000000100000];MSSSNKKAITLS/Phospho (ST)[00002000000000];MSSSNKKAITLS/Phospho (ST)[00020000000000];VTRMDEELSGPI/;KKVAGDDXLATIS/;WTTLLMPLDGSI/	31.280000;28.640000;28.220000;27.880000;26.150000;26.150000;24.520000;24.120000;22.210000	0.000745;0.001368;0.001507;0.001629;0.002427;0.002427;0.003532;0.003873;0.000000	2.640000;0.420000;0.340000;1.730000;0.000000;1.630000;0.400000;1.910000;NA	0.004609542930;0.002509908354;0.002278546332;0.002106967633;0.001414678861;0.001414678861;0.000971981198;0.000886457388;0.000571028605	0.020065;0.010914;0.009907;0.009160;0.006148;0.006148;0.004223;0.003852;0.002481
query5163	711.985	1421.96	2	1421.9	0.058918	H	IIGVGVVLGLKNIGA	L	131	115	129			35.58	1	0	Solyc08g006930.2.1	22.85	0.97866	16.7081	cyr_090307_meja_05_2_bi3_p.02080.02080.2_49.904mins	1421.885712[0.070194];1421.885727[0.070179];1421.919418[0.036488];1421.958496[-0.002590];1421.896988[0.058918];1421.860687[0.095219];1421.908188[0.047718];1421.860657[0.095249];1421.860657[0.095249]	KAIVDAIPLEILK/;ILQLAVLGADLAIL/;LRIGVKARNVAII/;IIQLIGSIVLLLK/;IGVGVVLGLKNIGAL/;VVGGVIVVVVVGGGVGG/;ILGNVKRLVLLAN/;VVVGGGGVAAAVVIVVG/;VVAAAVVVVIVVGGGGG/	12.730000;9.510000;9.490000;8.990000;8.870000;8.700000;8.540000;7.840000;7.750000	0.053333;0.111944;0.112460;0.126183;0.129718;0.134896;0.139959;0.164437;0.000000	3.220000;0.020000;0.500000;0.120000;0.170000;0.160000;0.700000;0.090000;NA	0.005077290525;0.002418978535;0.002407864338;0.002146011350;0.002087526583;0.002007391194;0.001934781895;0.001646766466;0.001612991262	0.022107;0.010518;0.010470;0.009330;0.009075;0.008727;0.008411;0.007158;0.007011
query4138	657.353	1312.69	2	1312.67	0.026052	K	KFVENAATSFSI	A	259	246	257			49.38	1	0	Solyc07g044860.2.1	20.08	0.973539	15.7739	cyr_090307_meja_05_2_bi5_p.01704.01704.2_40.196mins	1312.627563[0.064795];1312.713928[-0.021570];1312.701660[-0.009302];1312.627563[0.064795];1312.627563[0.064795];1312.723816[-0.031458];1312.691452[0.000906];1312.629929[0.062429];1312.602402[0.089956]	ALTSTAVLTGQAT/Phospho (ST)[000002000000000];KQTRFISSFSL/;RKVVASFRAVT/Phospho (ST)[0000002000000];ALTSTAVLTGQAT/Phospho (ST)[000200000000000];ALTSTAVLTGQAT/Phospho (ST)[000020000000000];QAALGLGELIEVT/;FSSIEILASFLS/;SFSNQSLPSFLS/;REAVAANTTTTV/Phospho (ST)[00000000002000]	29.300000;27.390000;22.380000;22.350000;22.190000;21.770000;20.000000;20.000000;19.840000	0.001175;0.001824;0.005781;0.005821;0.006039;0.006653;0.010000;0.010000;0.000000	1.910000;5.010000;0.030000;0.160000;0.420000;1.770000;0.000000;0.160000;NA	0.009557694761;0.006156773214;0.001942464796;0.001929092962;0.001859315786;0.001687925043;0.001122931221;0.001122931221;0.001082313702	0.041708;0.026821;0.008444;0.008386;0.008082;0.007337;0.004880;0.004880;0.004703
query2987	612.304	1222.59	2	1222.59	-0.001079	F;F	NKVNYANVSTN	N;N	139	118	128			47.81	0	0	Solyc06g083680.2.1;Solyc09g063130.2.1	22.91	0.972041	15.5348	cyr_090307_meja_05_2_bi7_p.01035.01035.2_23.516mins	1222.540054[0.053060];1222.637970[-0.044856];1222.622711[-0.029597];1222.586334[0.006780];1222.637970[-0.044856];1222.557831[0.035283];1222.527100[0.066014];1222.524811[0.068303];1222.539993[0.053121]	STKCNAAWGATN/;NIKNLLMFTN/Oxidation (M)[000000010000];CESTLKKLXTN/;ECSTLKKEATGG/;IPYGCKSLKXN/;GNYAGAAGSAAVTGG/;KNGSSYLEFV/Phospho (ST)[000020000000];QNVNSATTMQN/Oxidation (M)[0000000001000];KNVPTPPLPT/2 Phospho (ST)[000002000020]	24.900000;23.410000;23.050000;23.050000;23.050000;22.480000;21.950000;21.450000;21.140000	0.003236;0.004560;0.004955;0.004955;0.004955;0.005649;0.006383;0.007161;0.000000	1.490000;0.360000;0.000000;0.000000;0.570000;0.530000;0.500000;0.310000;NA	0.004973756365;0.003529266940;0.003248512243;0.003248512243;0.003248512243;0.002848947905;0.002521648262;0.002247421379;0.002092591746	0.021655;0.015355;0.014131;0.014131;0.014131;0.012390;0.010965;0.009771;0.009098
query5557	732.378	1462.74	2	1462.7	0.044164	A;A;A	KYGDKSVYFDLE	D;D;D	146	51	62			37.1	0	0	Solyc03g120640.2.1;Solyc06g066640.2.1;Solyc12g044280.1.1	23.38	0.971977	15.5248	cyr_090307_meja_05_2_bi5_p.01612.01612.2_37.807mins	1462.659225[0.082937];1462.659225[0.082937];1462.803131[-0.060969];1462.647217[0.094945];1462.710892[0.031270];1462.704742[0.037420];1462.716614[0.025548];1462.677841[0.064321];1462.682770[0.059392]	KSIDSAYSGTLLE/Phospho (ST)[000000002000000];KSIDSAYSGTLLE/Phospho (ST)[000000000020000];TVVAKGYLKAGDIE/;KLLEMMGAFYDN/2 Oxidation (M)[00000110000000];FLDFDKKLVTAS/Phospho (ST)[00000000000020];MIDMGPLVIDKAE/2 Oxidation (M)[010010000000000];MLDFYLKNYQL/Oxidation (M)[0100000000000];KSMIEKKFDIE/Oxidation (M) Phospho (ST)[0021000000000];FIDTIDDEPIQGT/	13.720000;12.890000;12.360000;12.200000;12.020000;11.830000;11.640000;11.500000;10.480000	0.042462;0.051404;0.058076;0.060256;0.062806;0.065615;0.068549;0.070795;0.000000	0.830000;0.530000;0.160000;0.180000;0.190000;0.190000;0.140000;1.020000;NA	0.004463298467;0.003686853914;0.003263291951;0.003145255495;0.003017560108;0.002888390645;0.002764750401;0.002677046591;0.002116683526	0.019427;0.016041;0.014195;0.013681;0.013125;0.012562;0.012024;0.011642;0.009202
query15849	1240.11	2478.21	2	2478.18	0.026296	A	RAFFVFGDSLVDSGNNNYLATTA	R	363	24	46			44.93	1	0	Solyc11g006250.1.1	23.58	0.969986	15.2268	cyr_090307_meja_05_2_bi4_p.02077.02077.2_50.039mins	2478.215118[-0.007258];2478.284531[-0.076671];2478.284531[-0.076671];2478.136261[0.071599];2478.172821[0.035039];2478.163910[0.043950];2478.113632[0.094228];2478.113632[0.094228];2478.120316[0.087544]	TVEIIMSTIGDVRLMSVSAFVV/2 Oxidation (M) Phospho (ST)[000000100000000120000000];TKNVFVVIATSVTLSFAVSLGMV/Oxidation (M) Phospho (ST)[0000000000020000000000100];TKNVFVVIATSVTLSFAVSLGMV/Oxidation (M) Phospho (ST)[0000000000200000000000100];PISNFSRNAKSGGVDTMVNFKN/Oxidation (M) Phospho (ST)[000200000000000001000000];MGAVFLMREITGKYFYIDTK/Oxidation (M) Phospho (ST)[0100000000000000000200];GNDDTNEGQTKVPKILD…	21.350000;21.300000;21.300000;20.630000;20.220000;19.680000;19.280000;19.280000;18.660000	0.007328;0.007413;0.007413;0.008650;0.009506;0.010765;0.011803;0.011803;0.000000	0.050000;0.000000;0.670000;0.410000;0.540000;0.400000;0.000000;0.620000;NA	0.004253686069;0.004204994527;0.004204994527;0.003603839449;0.003279181347;0.002895779137;0.002640981961;0.002640981961;0.002289630675	0.018513;0.018301;0.018301;0.015680;0.014265;0.012594;0.011485;0.011485;0.009955
query191	414.241	826.467	2	826.455	0.011679	D	PVENIGAK	L	600	119	126			56.38	1	0	Solyc01g028810.2.1	15.76	0.9675	14.8811	cyr_090307_meja_05_2_bi5_p.01057.01057.2_23.237mins	826.491226[-0.024698];826.527618[-0.061090];826.491241[-0.024713];826.491226[-0.024698];826.466095[0.000433];826.527618[-0.061090];826.491226[-0.024698];826.466080[0.000448];826.429718[0.036810]	PVENIKK/;PVDKIKK/;PVDKLKQ/;PVNEIKK/;KDVPVRN/;PVEKVKK/;PDLNLKK/;PNNGGIKK/;DVRNVPQ/	40.620000;27.240000;27.240000;27.240000;25.910000;24.480000;24.400000;24.400000;24.000000	0.000087;0.001888;0.001888;0.001888;0.002564;0.003565;0.003631;0.003631;0.000000	13.380000;0.000000;0.000000;1.330000;1.430000;0.080000;0.000000;0.400000;NA	0.025683303553;0.001179372195;0.001179372195;0.001179372195;0.000868262181;0.000624670339;0.000613268820;0.000613268820;0.000559307811	0.112999;0.005125;0.005125;0.005125;0.003772;0.002714;0.002664;0.002664;0.002430
query8355	859.457	1716.9	2	1716.85	0.045597	-;-	MIYDVNSPLFRSFL	S;S	49	1	14	Oxidation (M)	[0100000000000000]	38.29	0	0	Solyc06g063390.2.1;Solyc06g083340.2.1	22.75	0.966546	14.7555	cyr_090307_meja_05_2_bi3_p.02170.02170.2_52.260mins	1716.842606[0.057514];1716.850510[0.049610];1716.822296[0.077824];1716.842041[0.058079];1716.819641[0.080479];1716.916046[-0.015926];1716.842041[0.058079];1716.904602[-0.004482];1716.981430[-0.081310]	KDMMLEKVSIKSXN/2 Oxidation (M)[0001100000000000];PGLQAELIGSMVGGFAGN/;KTGGLTVYDDIEITL/Phospho (ST)[00200000000000000];NAANPRVRSITSKHS/Phospho (ST)[00000000000000020];KGGTGRAVLGSTSGSGFV/Phospho (ST)[00002000000000000000];LFYSLQMISFALALT/;NAANPRVRSITSKHS/Phospho (ST)[00000000000020000];AIARASGLPENTLYIE/;VVILLVSIIASYWAGN/	15.540000;14.640000;14.580000;14.240000;14.050000;14.030000;13.320000;13.150000;13.110000	0.027925;0.034356;0.034834;0.037670;0.039355;0.039537;0.046559;0.048417;0.000000	0.900000;0.060000;0.340000;0.190000;0.020000;0.710000;0.170000;0.040000;NA	0.005131240210;0.004170828629;0.004113602715;0.003803840918;0.003641013975;0.003624285036;0.003077672088;0.002959527269;0.002932394160	0.022342;0.018152;0.017902;0.016551;0.015842;0.015769;0.013387;0.012872;0.012754
query7519	551.31	1650.91	3	1650.91	-0.001365	L	VTFGDTNLAIFRVAK	F	203	169	183			32.5	1	0	Solyc01g009080.2.1	22.41	0.96418	14.4587	cyr_090307_meja_05_2_bi3_p.01860.01860.3_44.181mins	1650.932098[-0.024115];1650.945709[-0.037726];1650.832047[0.075936];1650.909302[-0.001319];1650.847321[0.060662];1650.868912[0.039071];1650.861725[0.046258];1650.824677[0.083306];1650.817078[0.090905]	VVKALSGLIAKASTLT/Phospho (ST)[000000200000000000];YRSITNLQIGKVIF/;TAMTEERIAAMSLLV/Oxidation (M)[00010000000000000];YDIKGSALAIRNLAF/;IKKCMAIHEVYVTT/Oxidation (M)[0000010000000000];SGHIPENITSLRNLT/;GYVTAQDIILPPHVE/;MTNSVDSRIKLSVDS/;NAITFFKLNTGAKF/Phospho (ST)[0000200000000000]	10.090000;10.010000;9.310000;8.520000;7.970000;7.920000;7.890000;7.700000;7.550000	0.097949;0.099770;0.117220;0.140605;0.159588;0.161436;0.162555;0.169824;0.000000	0.080000;0.700000;0.790000;0.550000;0.050000;0.030000;0.190000;0.150000;NA	0.005535514688;0.005434480158;0.004625492780;0.003856186301;0.003397488594;0.003358597864;0.003335477439;0.003192699229;0.003084309897	0.024107;0.023666;0.020135;0.016780;0.014780;0.014611;0.014510;0.013888;0.013416
query12285	692.412	2074.21	3	2074.16	0.053335	Q	KVQLILNHVIPKFYTFD	D	248	103	119			32.2	1	0	Solyc07g053540.1.1	22.96	0.963506	14.3777	cyr_090307_meja_05_2_bi5_p.01909.01909.3_45.543mins	2074.154343[0.060522];2074.237427[-0.022562];2074.201279[0.013586];2074.145538[0.069327];2074.193848[0.021017];2074.160812[0.054053];2074.136368[0.078497];2074.160873[0.053992];2074.150986[0.063879]	IGAFLGRSPMVKSCARVLIG/;KASKFLKNLKVNSKREKG/;KKYGPVMLLQFGSKPVIVA/;KRVKEEMIKAEELAKKE/Oxidation (M)[0000000100000000000];KLLDYKRLIGDAKKLWD/;LKHEKIPLAVEACKAPAEK/;KKVKIDSFVLHNLYWGQ/;LAGLAFKTDLLTGAMVRKGP/Oxidation (M)[0000000000000001000000];KILLGIGGGHYVPRHMDIV/	9.240000;9.200000;9.200000;9.200000;9.010000;7.660000;7.530000;7.170000;6.850000	0.119124;0.120226;0.120226;0.120226;0.125603;0.171396;0.176604;0.191867;0.000000	0.040000;0.000000;0.000000;0.190000;1.350000;0.130000;0.360000;0.320000;NA	0.004873649037;0.004828967154;0.004828967154;0.004828967154;0.004622258730;0.003387304596;0.003287412872;0.003025897771;0.002810957319	0.021218;0.021023;0.021023;0.021023;0.020121;0.014736;0.014301;0.013161;0.012225
query9316	600.973	1799.9	3	1799.92	-0.019174	L	EGRSTPVKFSAHLKED	E	172	150	165			39.74	1	0	Solyc01g087520.2.1	21.99	0.958719	13.8425	cyr_090307_meja_05_2_bi4_p.01178.01178.3_26.584mins	1799.806992[0.090429];1799.864105[0.033316];1799.800858[0.096563];1799.908722[-0.011301];1799.872345[0.025076];1799.978119[-0.080698];1799.878693[0.018728];1799.859390[0.038031];1799.924011[-0.026590]	QMGDVMIQFTSESIAQ/Oxidation (M)[000000100000000000];QMVRTLKEHTYSVL/Oxidation (M) Phospho (ST)[0010020000000000];AGDFALTSKFSGKRVG/2 Phospho (ST)[000000022000000000];KLDSDGDSKXEHCLLL/;KLDSDGDSKXEHCLLL/;KSDGILIQREWETIL/;KDTDAVSRALRMKVM/Phospho (ST)[00000002000000000];FADLGLSLVGEAEISLS/Phospho (ST)[0000000000000002000];KIMGTNVDSPFHITQI/	17.750000;17.750000;17.490000;16.640000;16.640000;16.640000;15.190000;14.750000;14.630000	0.016788;0.016788;0.017824;0.021677;0.021677;0.021677;0.030269;0.033497;0.000000	0.000000;0.260000;0.850000;0.000000;0.000000;1.450000;0.440000;0.120000;NA	0.006063052581;0.006063052581;0.005710726149;0.004695602602;0.004695602602;0.004695602602;0.003362724861;0.003038724551;0.002955910870	0.026412;0.026412;0.024872;0.020441;0.020441;0.020441;0.014629;0.013217;0.012856
query23814	1240.11	4956.42	4	4956.4	0.018915	A	RAFFVFGDSLVDSGNNNYLATTARADSPPYGIDYPTRRATGRFSN	G	363	24	68			40.33	1	0	Solyc11g006250.1.1	20.76	0.957533	13.7195	cyr_090307_meja_05_2_bi4_p.02077.02077.4_50.039mins	4956.319443[0.096277];4956.319443[0.096277];4956.319443[0.096277];4956.436600[-0.020880];4956.336624[0.079096];4956.336624[0.079096];4956.489380[-0.073660];4956.489380[-0.073660];4956.489380[-0.073660]	QVMQTALNSDQGRAVFFKPRAPNQIEITESSDVNIKFYLDNP/Oxidation (M) 2 Phospho (ST)[00010200000000000000000000000002000000000000];QVMQTALNSDQGRAVFFKPRAPNQIEITESSDVNIKFYLDNP/Oxidation (M) 2 Phospho (ST)[00010200000000000000000000000020000000000000];QVMQTALNSDQGRAVFFKPRAPNQIEITESSDVNIKFYLDNP/Oxidation (M) 2 Phospho (ST)[00010200000000000000000000002000000000000000];SQFLKGLLSIRFVSDDQKKYLRLYMWILAAGENIYVPEYN/Oxid…	19.570000;19.570000;19.570000;17.040000;15.320000;15.320000;14.680000;14.680000;14.680000	0.011041;0.011041;0.011041;0.019770;0.029376;0.029376;0.034041;0.034041;0.000000	0.000000;0.000000;2.530000;1.720000;0.000000;0.640000;0.000000;0.000000;NA	0.008038109341;0.008038109341;0.008038109341;0.004489044489;0.003021022150;0.003021022150;0.002607077308;0.002607077308;0.002607077308	0.035050;0.035050;0.035050;0.019540;0.013140;0.013140;0.011337;0.011337;0.011337
query11567	1005.53	2009.05	2	2009.04	0.012532	L	AVQSKPPSKRDPPKMQTD	N	202	180	197			37.27	1	0	Solyc05g051750.2.1	18.14	0.9562	13.5853	cyr_090307_meja_05_2_bi4_p.00977.00977.2_21.341mins	2009.038696[0.010228];2009.038696[0.010228];2009.113846[-0.064922];2009.097931[-0.049007];2009.054153[-0.005229];2009.107437[-0.058513];2008.951996[0.096928];2009.002502[0.046422];2008.994431[0.054493]	QIYAQLVQGLWVPKSSL/Phospho (ST)[0000000000000000200];QIYAQLVQGLWVPKSSL/Phospho (ST)[0000000000000002000];KSLGKPIHRQCKQCKQK/;QSIGKMTLVLTDQRLYK/Oxidation (M)[0000001000000000000];EGLLTSGASHKLDADAVXLG/;TRKKSVWIDLKISLGSV/Phospho (ST)[0000020000000000000];SKYGRGGFENPRFKSSL/Phospho (ST)[0000000000000000200];AKVSKSVGKDSSRSGASEET/;KVASAEVMSKYFIGSLLS/Phospho (ST)[00000000000000000020]	19.130000;14.110000;13.520000;13.300000;12.970000;12.950000;12.630000;12.430000;12.420000	0.012218;0.038815;0.044463;0.046774;0.050466;0.050699;0.054576;0.057148;0.000000	5.020000;0.590000;0.220000;0.330000;0.020000;0.320000;0.200000;0.010000;NA	0.014674012545;0.004619009825;0.004032263327;0.003833088848;0.003552621060;0.003536298249;0.003285102207;0.003137248252;0.003130032781	0.064201;0.020107;0.017547;0.016679;0.015456;0.015385;0.014291;0.013646;0.013615
query6610	790.428	1578.84	2	1578.79	0.051823	H	TTRTPSFLGLDVSAD	Y	772	114	128			45.69	1	0	Solyc03g044150.2.1	14.19	0.955446	13.5111	cyr_090307_meja_05_2_bi3_p.01858.01858.2_44.118mins	1578.792313[0.048481];1578.744980[0.095814];1578.744720[0.096074];1578.804169[0.036625];1578.788940[0.051854];1578.782410[0.058384];1578.745972[0.094822];1578.791916[0.048878];1578.756592[0.084202]	LSTADRMIGLTISGE/Oxidation (M)[00000001000000000];EVDRRMRAPTRX/Oxidation (M) Phospho (ST)[00000010002000];MVGSDLATISGDLVGE/Oxidation (M)[010000000000000000];YAGEEELRLKVSX/;ASISIFTSPRDLSGE/;NLVDMSKRSLSWQ/Oxidation (M)[000001000000000];TLLLGFSKGGTVLN/2 Phospho (ST)[0200000200000000];SRFDGLHLSKLLN/Phospho (ST)[000000000200000];QYVYPVLNPVDDAS/	31.500000;20.550000;16.770000;16.470000;16.430000;12.700000;12.570000;11.830000;11.680000	0.000708;0.008810;0.021038;0.022542;0.022751;0.053703;0.055335;0.065615;0.000000	10.950000;3.780000;0.300000;0.040000;3.730000;0.130000;0.740000;0.150000;NA	0.036408782625;0.002925540792;0.001225197658;0.001143420984;0.001132938037;0.000479961230;0.000465807158;0.000392831367;0.000379495087	0.161072;0.012724;0.005324;0.004969;0.004923;0.002085;0.002023;0.001706;0.001648
query11304	992.023	1982.03	2	1981.96	0.07491	L	TGAVTPPGFRFVVTSNGEM	L	389	320	338	Oxidation (M)	[000000000000000000010]	37.69	1	0	Solyc05g005480.2.1	20.92	0.955141	13.4815	cyr_090307_meja_05_2_bi3_p.01771.01771.2_41.856mins	1981.948059[0.083653];1981.996429[0.035283];1981.996979[0.034733];1981.977875[0.053837];1982.090866[-0.059154];1981.993149[0.038563];1982.087677[-0.055965];1982.025528[0.006184];1982.044800[-0.013088]	MSINKGTTCVLLVMVFF/Phospho (ST)[0020000000000000000];TKTLLLAIFTMQIKVS/Oxidation (M) 2 Phospho (ST)[000000000021000020];SSLKRNFSRGSFGEVTPN/;DTNVMHNLKDEILLTPN/Oxidation (M)[0000010000000000000];RQQLSKTSPTKILNGTPN/;KTAEPVACDGPFISPPPRT/;LSVLIQPAYFPILNPSPN/;TIRGLTPMQQPVQSVTPN/Oxidation (M)[00000000100000000000];TKTMGWSRFAXKLPVTP/Oxidation (M)[0000100000000000000]	16.770000;15.740000;15.110000;14.890000;14.490000;14.090000;14.060000;13.970000;13.700000	0.021038;0.026669;0.030832;0.032434;0.035563;0.038994;0.039264;0.040087;0.000000	1.030000;0.630000;0.220000;0.400000;0.400000;0.030000;0.090000;0.270000;NA	0.007728009505;0.006096318487;0.005273119914;0.005012653068;0.004571593932;0.004169343219;0.004140641662;0.004055717041;0.003811251845	0.033693;0.026557;0.022961;0.021824;0.019900;0.018145;0.018020;0.017650;0.016584
query10766	967.521	1933.03	2	1932.98	0.044499	A	LEVLLGGDDGSLAFIPGNF	S	171	72	90			38.87	1	0	Solyc04g082010.1.1	16.33	0.954279	13.3988	cyr_090307_meja_05_2_bi3_p.02348.02348.2_56.912mins	1932.963165[0.064641];1933.078705[-0.050899];1932.991318[0.036488];1933.009781[0.018025];1933.070663[-0.042857];1932.958115[0.069691];1932.955734[0.072072];1932.931427[0.096379];1932.962830[0.064976]	ASVGHMVGIEILVETLLG/Oxidation (M) Phospho (ST)[00200010000000000000];SKAFLFLGIFLAIFSMI/Oxidation (M)[0000000000000000100];YAAKMLHDAMLNSILRA/Oxidation (M)[0000000000100000000];QASFFLLNFQGLLHEGL/;VGMSQIAKAFAIATALVLGG/Oxidation (M)[0001000000000000000000];AFQSLKHEDAENIGYVI/;SQKLLDLNPNPSLSSLQ/Phospho (ST)[0200000000000000000];LYXISYIIFALFTNE/Phospho (ST)[00000200000000000];LANLRTPGNFLRMDWN/Oxidation (…	22.540000;15.260000;14.760000;14.080000;13.790000;13.220000;12.880000;12.870000;12.330000	0.005572;0.029785;0.033420;0.039084;0.041783;0.047643;0.051523;0.051642;0.000000	7.280000;0.500000;0.680000;0.290000;0.570000;0.340000;0.010000;0.540000;NA	0.022216487339;0.004155998609;0.003704037659;0.003167199305;0.002962616201;0.002598216841;0.002402566369;0.002397040619;0.002116778391	0.097573;0.018087;0.016116;0.013777;0.012886;0.011299;0.010447;0.010423;0.009203
query7149	812.002	1621.99	2	1621.94	0.044164	D	PPLAVFQLDKVLVPS	Q	248	170	184			34.54	1	0	Solyc07g053540.1.1	17.41	0.953169	13.2947	cyr_090307_meja_05_2_bi4_p.02166.02166.2_52.355mins	1621.907944[0.080556];1621.905533[0.082967];1621.940262[0.048238];1621.922516[0.065984];1621.926361[0.062139];1621.999115[-0.010615];1621.899002[0.089498];1621.926376[0.062124];1621.915146[0.073354]	YTVKNFLDVIQGLI/;ASIEKIDLKKIVVS/Phospho (ST)[0000000000000020];AGNAPVDKLELKLALA/;QAIMTKKLGLVKYN/Oxidation (M)[0000100000000000];ILLSSKDLQRQGHK/;GRIIDLLKRGALNLA/;LTMAKKDIRGLLAI/Phospho (ST)[0020000000000000];QTRSGARIQLVPLPS/;RITGLTDIVLSHNAL/	17.130000;12.770000;10.450000;10.110000;9.880000;9.790000;9.790000;9.790000;9.790000	0.019364;0.052845;0.090157;0.097499;0.102802;0.104954;0.104954;0.104954;0.000000	4.360000;2.320000;0.340000;0.230000;0.090000;0.000000;0.000000;0.000000;NA	0.017304938910;0.006341179843;0.003716807514;0.003436925121;0.003259643242;0.003192787912;0.003192787912;0.003192787912;0.003192787912	0.075812;0.027627;0.016172;0.014952;0.014180;0.013888;0.013888;0.013888;0.013888
query17884	693.875	2771.47	4	2771.42	0.049449	K	VFVRADLNVPLDDSQNITDDTRIR	A	483	95	118			31.26	1	0	Solyc07g066610.2.1	20.69	0.951074	13.1046	cyr_090307_meja_05_2_bi3_p.01697.01697.4_39.924mins	2771.404083[0.065593];2771.396454[0.073222];2771.475220[-0.005544];2771.449356[0.020320];2771.418671[0.051005];2771.399811[0.069865];2771.374252[0.095424];2771.374252[0.095424];2771.374252[0.095424]	RERFKSLSVNLMKDGSLQLQDVL/Oxidation (M) Phospho (ST)[0000002000001000000000000];RFAYLSKSNNKFKIPKIPISFN/2 Phospho (ST)[000000202000000000000000];GDKKTKEKVIPTEPATLKQHGVHCQ/;HPLFSYITTLIPAASSSALSXESPIN/;YKSYVKFSLGVSDEGVLIIVSFKN/Phospho (ST)[00000000000000000000020000];ADVPKYLKLMKPLYARASKRYT/2 Phospho (ST)[000000000000000000200020];ASFSGKVSVSIADAGETAVVVSIVERN/Phospho (ST)[00000000200000000000000000000];…	10.570000;9.660000;8.640000;8.510000;8.390000;8.380000;8.220000;8.220000;8.220000	0.087700;0.108143;0.136773;0.140929;0.144877;0.145211;0.150661;0.150661;0.000000	0.910000;1.020000;0.130000;0.120000;0.010000;0.160000;0.000000;0.000000;NA	0.008113616159;0.006579826744;0.005202528382;0.005049105650;0.004911503503;0.004900207359;0.004722962074;0.004722962074;0.004722962074	0.035381;0.028670;0.022653;0.021984;0.021383;0.021334;0.020560;0.020560;0.020560
query9764	922.473	1842.93	2	1842.92	0.010319	A	RDLSDGIEVLEILENE	I	115	28	43			51.42	1	0	Solyc09g089540.2.1	13.86	0.950052	13.0148	cyr_090307_meja_05_2_bi3_p.02236.02236.2_53.980mins	1842.958328[-0.026958];1842.987305[-0.055935];1842.976059[-0.044689];1842.993805[-0.062435];1843.009735[-0.078365];1842.947525[-0.016155];1842.957428[-0.026058];1842.987289[-0.055919];1842.915207[0.016163]	LMKDIELVMKGLVDHS/Oxidation (M)[001000000000000000];AVKGLMASQVNKLASPTX/;ALDLVGLIQAAKXIEEN/Oxidation (M)[0000000000000100000];KTAIAEEEILNKIDSGI/;LMNRGLKRKNLELEN/Oxidation (M)[00100000000000000];EIQRKWKEELDQEL/;LEELDIQEKIEIDRT/;KMQKEVQVQKLIEEN/;DQFLILASDGLWEHLS/	37.560000;27.950000;24.530000;21.370000;20.930000;20.730000;20.270000;20.260000;19.530000	0.000175;0.001603;0.003524;0.007295;0.008072;0.008453;0.009397;0.009419;0.000000	9.610000;3.420000;3.160000;0.440000;0.200000;0.460000;0.010000;0.730000;NA	0.039061349967;0.004273141247;0.001944228247;0.000939176568;0.000848686411;0.000810489231;0.000729033103;0.000727356373;0.000614818955	0.173043;0.018598;0.008452;0.004081;0.003687;0.003521;0.003167;0.003160;0.002671
query10231	941.53	1881.05	2	1881	0.042118	L;L	IFYFEAGQGKTPLGALGL	-;-	257	239	256			35.12	0	0	Solyc01g105030.2.1;Solyc01g105050.2.1	19.93	0.949393	12.9579	cyr_090307_meja_05_2_bi3_p.02232.02232.2_53.874mins	1881.000259[0.045491];1880.982498[0.063252];1880.998520[0.047230];1880.960052[0.085698];1880.963806[0.081944];1880.963806[0.081944];1880.979462[0.066288];1880.951965[0.093785];1880.969971[0.075779]	SQKKGKNTKFKRSCAGX/;HESQFALIKYTLFWV/;LNLEAVRISKNFXKN/Phospho (ST)[00000000020000000];FLSCLSKGLRAMGIRDD/;YTKKSGRIITTLRGK/2 Phospho (ST)[00000200000200000];YTKKSGRIITTLRGK/2 Phospho (ST)[00000200002000000];RILGLVERLTISMDVA/Oxidation (M) Phospho (ST)[000000000020010000];NILLDADYNAKLSDFGL/;TDCKKTLLSGVGGTLMKN/Oxidation (M)[00000000000000001000]	15.190000;14.970000;14.450000;11.920000;11.910000;11.910000;11.320000;10.380000;9.960000	0.030269;0.031842;0.035892;0.064269;0.064417;0.064417;0.073790;0.091622;0.000000	0.220000;0.520000;2.530000;0.010000;0.000000;0.590000;0.940000;0.420000;NA	0.009648197247;0.009171622553;0.008136660088;0.004544082144;0.004533631045;0.004533631045;0.003957730097;0.003187470496;0.002893651156	0.042105;0.040016;0.035482;0.019780;0.019734;0.019734;0.017222;0.013865;0.012585
query8371	859.932	1717.85	2	1717.81	0.043371	R;R	FNKVNYANVSTNNYA	L;L	139	117	131			34.82	0	0	Solyc06g083680.2.1;Solyc09g063130.2.1	20.72	0.946751	12.7368	cyr_090306_meja_005_bi9_2_p.01530.01530.2_32.413mins	1717.840012[0.009328];1717.841660[0.007680];1717.776276[0.073064];1717.787506[0.061834];1717.757660[0.091680];1717.856888[-0.007548];1717.846420[0.002920];1717.841660[0.007680];1717.816483[0.032857]	IDTLEGKGGHNVKTVA/Phospho (ST)[000200000000000000];RATAATVISVVLSVTA/2 Phospho (ST)[000200000000000200];AESGMLVGKPLVGSIT/2 Phospho (ST)[000200000000002000];KRPTMASVVQTLLD/2 Phospho (ST)[0000200000020000];KSEATVPALVVAGTDT/2 Phospho (ST)[002002000000000000];SAKNIPGKVKFLVSA/2 Phospho (ST)[02000000000000200];SFFWTQSSTVRXLP/;RATAATVISVVLSVTA/2 Phospho (ST)[000000200000000200];KKTDKRGGVIVASEA/2 Phospho (…	14.100000;13.940000;13.640000;13.270000;12.380000;11.940000;11.650000;11.590000;11.410000	0.038905;0.040365;0.043251;0.047098;0.057810;0.063973;0.068391;0.069343;0.000000	0.160000;0.300000;0.370000;0.890000;0.440000;0.290000;0.060000;0.180000;NA	0.008021130194;0.007730998083;0.007214987210;0.006625757939;0.005398033377;0.004877930021;0.004562843419;0.004500238861;0.004317532005	0.034976;0.033706;0.031448;0.028871;0.023507;0.021236;0.019862;0.019588;0.018791
query2778	603.347	1204.68	2	1204.68	-0.001902	D	FSLANVTKVNL	S	229	145	155			41.41	1	0	Solyc06g076480.2.1	16.1	0.94478	12.579	cyr_090307_meja_05_2_bi3_p.01870.01870.2_44.435mins	1204.612152[0.067510];1204.659775[0.019887];1204.660446[0.019216];1204.616867[0.062795];1204.593521[0.086141];1204.649887[0.029775];1204.637283[0.042379];1204.649887[0.029775];1204.593536[0.086126]	SLNKGGVAMLES/;TKVGRMKLGSE/;HLPAPNVFIPT/;FVTAYFIFPT/;KTISDQNAELS/;KTGVRMNPRF/;SEIKCLLASIE/;KTGVRNMPRF/;QTSPKASLDSAT/	25.310000;19.520000;18.760000;18.550000;18.010000;17.680000;15.750000;15.670000;15.610000	0.002944;0.011169;0.013305;0.013964;0.015812;0.017061;0.026607;0.027102;0.000000	5.790000;0.760000;0.210000;0.540000;0.330000;1.930000;0.080000;0.060000;NA	0.023191588044;0.006114071145;0.005132518081;0.004890243539;0.004318475778;0.004002492142;0.002566436292;0.002519593550;0.002485023431	0.101906;0.026635;0.022348;0.021290;0.018796;0.017417;0.011160;0.010956;0.010806
query13471	1096.54	2191.06	2	2191.01	0.056875	Q	AYFGKTDSEGGFESGAVATANL	L	259	164	185			30.57	1	0	Solyc07g044860.2.1	18.19	0.942744	12.4218	cyr_090307_meja_05_2_bi3_p.01695.01695.2_39.881mins	2191.017090[0.046728];2191.017090[0.046728];2191.023163[0.040655];2191.007523[0.056295];2191.091583[-0.027765];2191.111008[-0.047190];2191.120346[-0.056528];2191.032303[0.031515];2191.057907[0.005911]	KRGENERFSLRDGYSALN/Phospho (ST)[00000000000000020000];KRGENERFSLRDGYSALN/Phospho (ST)[00000000020000000000];MLISPSLQQAEIHSLEAGST/Phospho (ST)[0000000000000000000200];VEPRTISGETRFASLAALN/2 Phospho (ST)[000000000020002000000];NLALNGPDHRMVAAEANTAAR/;LRLSPRPQNTKNTSTTLAN/Phospho (ST)[000000000000020000000];KIFVFVAMTSLSSTMLGCRT/;TEMGNKVCSAKVMLFTSSLN/2 Oxidation (M)[0001000000000100000000];AGGTPPGNSIEMF…	12.380000;10.890000;8.770000;8.310000;7.880000;6.980000;6.950000;6.940000;6.380000	0.057810;0.081470;0.132739;0.147571;0.162930;0.200447;0.201837;0.202302;0.000000	1.490000;2.120000;0.460000;0.430000;0.900000;0.030000;0.010000;0.560000;NA	0.014301895230;0.010148306895;0.006228645189;0.005602651284;0.005074503919;0.004124711640;0.004096317325;0.004086896056;0.003592473657	0.062561;0.044299;0.027135;0.024400;0.022094;0.017950;0.017827;0.017786;0.015630
query14598	1168.06	2334.11	2	2334.08	0.028158	L	VGDYGFDPFGLGKPAEYLQFD	L	286	67	87			29.43	1	0	Solyc09g014520.2.1	16.69	0.9419	12.3582	cyr_090307_meja_05_2_bi3_p.02227.02227.2_53.747mins	2334.200165[-0.087519];2334.109390[0.003256];2334.065781[0.046865];2334.065781[0.046865];2334.152176[-0.039530];2334.100937[0.011709];2334.100937[0.011709];2334.100937[0.011709];2334.100937[0.011709]	DRDVNMVSINAGLLIHPDLNI/Oxidation (M)[00000010000000000000000];QRGTSTNARPGTIKKSTTTGI/2 Phospho (ST)[00000000000020002000000];FAGDIQGGLGLRAEVLSSNIAS/2 Phospho (ST)[000000000000000000200020];FAGDIQGGLGLRAEVLSSNIAS/2 Phospho (ST)[000000000000000002000020];DHRTYVDLKDKWKTLVHT/Phospho (ST)[00002000000000000000];HLRLMMLMSFMVVGLGSIAT/3 Oxidation (M) Phospho (ST)[0000001012010000000000];HLRLMMLMSFMVVGLGSIAT…	12.740000;7.510000;6.510000;6.510000;6.340000;6.130000;6.130000;6.130000;6.130000	0.053211;0.177419;0.223357;0.223357;0.232274;0.243781;0.243781;0.243781;0.000000	5.230000;1.000000;0.000000;0.170000;0.210000;0.000000;0.000000;0.000000;NA	0.020183876362;0.006053472547;0.004808444162;0.004808444162;0.004623858947;0.004405595067;0.004405595067;0.004405595067;0.004405595067	0.088554;0.026370;0.020933;0.020933;0.020128;0.019176;0.019176;0.019176;0.019176
query3230	621.875	1241.73	2	1241.71	0.021505	K	VFVRADLNVPL	D	483	95	105			47.42	1	0	Solyc07g066610.2.1	18.37	0.941802	12.351	cyr_090307_meja_05_2_bi5_p.01827.01827.2_43.412mins	1241.655045[0.079671];1241.642105[0.092611];1241.686722[0.047994];1241.713196[0.021520];1241.636368[0.098348];1241.709183[0.025533];1241.672760[0.061956];1241.643799[0.090917];1241.650314[0.084402]	GNGVCGSLIGRIX/;EVVVFRTLVT/Phospho (ST)[000000020000];DLVNTSGTLLPI/;GAKAKTNFPVLP/;GKAANNLAEGALN/;DIGRLSVVRDL/;EVAAALSQALRN/;GAKTXPAQCAVLP/;NTLLIDASDALP/	29.050000;28.800000;27.020000;26.110000;25.320000;23.040000;21.230000;21.220000;21.160000	0.001245;0.001318;0.001986;0.002449;0.002938;0.004966;0.007534;0.007551;0.000000	0.250000;1.780000;0.910000;0.790000;2.280000;1.810000;0.010000;0.060000;NA	0.013707549551;0.012940761241;0.008589340599;0.006965620739;0.005807106949;0.003435261677;0.002264434821;0.002259226765;0.002228229012	0.059943;0.056568;0.037464;0.030357;0.025293;0.014945;0.009845;0.009823;0.009688
query4529	677.375	1352.74	2	1352.69	0.045094	L	MLFAGRFGLAPSA	N	131	64	76	Oxidation (M)	[010000000000000]	36.62	1	0	Solyc08g006930.2.1	20.1	0.9414	12.321	cyr_090307_meja_05_2_bi3_p.01803.01803.2_42.694mins	1352.708847[0.027333];1352.686584[0.049596];1352.716232[0.019948];1352.664612[0.071568];1352.639435[0.096745];1352.679840[0.056340];1352.716232[0.019948];1352.691071[0.045109];1352.683868[0.052312]	SWKFLKVGXSSN/;VMLGLMALTMKN/2 Oxidation (M)[00000010001000];FIFNLCLLVSAN/;MEFLVSTVVGASN/;EMFSIASRSATGP/;FLMAIFPEGKAN/Oxidation (M)[00010000000000];FLMFLLLVNNN/Oxidation (M)[0001000000000];FLMKTWAKAQN/Oxidation (M)[0001000000000];IFYLYFVKMN/Oxidation (M)[000000000100]	16.520000;15.710000;15.190000;15.190000;14.470000;14.380000;14.380000;14.380000;14.380000	0.022284;0.026853;0.030269;0.030269;0.035727;0.036475;0.036475;0.036475;0.000000	0.810000;0.520000;0.000000;0.720000;0.090000;0.000000;0.000000;0.000000;NA	0.009199710968;0.007634387207;0.006772892509;0.006772892509;0.005738180207;0.005620490047;0.005620490047;0.005620490047;0.005620490047	0.040139;0.033283;0.029514;0.029514;0.024992;0.024478;0.024478;0.024478;0.024478
query1777	531.284	1060.55	2	1060.57	-0.012492	G	VSNFDPVKR	T	112	102	110			40.69	1	0	Solyc05g025600.1.1	17.94	0.939431	12.1775	cyr_090307_meja_05_2_bi4_p.01162.01162.2_26.161mins	1060.577759[-0.023707];1060.581131[-0.027079];1060.569901[-0.015849];1060.595032[-0.040980];1060.558655[-0.004603];1060.581787[-0.027735];1060.459030[0.095022];1060.544754[0.009298];1060.508377[0.045675]	GENFRLGLR/;GKDMLRGLR/Oxidation (M)[00001000000];TQAMIVNLR/Oxidation (M)[00001000000];DANMIKKLL/Oxidation (M)[00001000000];DANMLLQKI/Oxidation (M)[00001000000];WNFPRKTL/;FDSDIKTR/Phospho (ST)[0000000200];DGAGMALVRR/Oxidation (M)[000001000000];GRSMGPLGDR/Oxidation (M)[000010000000]	22.750000;19.670000;19.670000;18.980000;18.980000;18.980000;16.950000;16.780000;16.780000	0.005309;0.010789;0.010789;0.012647;0.012647;0.012647;0.020184;0.020989;0.000000	3.080000;0.000000;0.690000;0.000000;0.000000;2.030000;0.170000;0.000000;NA	0.015096100810;0.007427878433;0.007427878433;0.006336723938;0.006336723938;0.006336723938;0.003970679076;0.003818253753;0.003818253753	0.066061;0.032379;0.032379;0.027608;0.027608;0.027608;0.017279;0.016614;0.016614
query1444	508.812	1015.61	2	1015.61	0.003666	Q	PIAIFTINK	V	416	317	325			38.93	1	0	Solyc10g005960.1.1	15.71	0.938898	12.1394	cyr_090307_meja_05_2_bi3_p.01779.01779.2_42.068mins	1015.606613[0.003651];1015.595367[0.014897];1015.537186[0.073078];1015.573578[0.036686];1015.570206[0.040058];1015.541031[0.069233];1015.570236[0.040028];1015.602570[0.007694];1015.566177[0.044087]	LAPIFITKGG/;LPAITLFLE/;PLAMKGSAEL/;PMLILTANK/Oxidation (M)[00100000000];LPALFEQAK/;QKREITNQ/;PLAIFGLGGAT/;KDKVLASQK/;KASLAPSTNK/	23.220000;17.110000;16.960000;16.510000;15.710000;15.150000;14.980000;14.250000;13.960000	0.004764;0.019454;0.020137;0.022336;0.026853;0.030549;0.031769;0.037584;0.000000	6.110000;0.150000;0.450000;0.800000;0.560000;0.170000;0.730000;0.290000;NA	0.025212631895;0.006174733000;0.005965106242;0.005377967621;0.004473198629;0.003932042317;0.003781100172;0.003196083986;0.002989635096	0.110901;0.026900;0.025984;0.023419;0.019470;0.017110;0.016452;0.013903;0.013003
query4502	676.361	1350.71	2	1350.7	0.004171	D	LLNAAGETYSVTL	S	171	133	145			35.59	1	0	Solyc04g082010.1.1	16.37	0.935635	11.9135	cyr_090307_meja_05_2_bi3_p.01840.01840.2_43.660mins	1350.654434[0.052816];1350.633316[0.073934];1350.639053[0.068197];1350.619675[0.087575];1350.654434[0.052816];1350.619659[0.087591];1350.703110[0.004140];1350.665848[0.041402];1350.636673[0.070577]	RLTLTADAASVGP/Phospho (ST)[000000000020000];AHFKTVSSQPGL/Phospho (ST)[00000000200000];RDYTMWHLLT/Oxidation (M)[000001000000];KEKTSLSGKTL/2 Phospho (ST)[0000020200000];PQTPASTSLRTL/Phospho (ST)[00000000200000];SAKKSKSELTL/2 Phospho (ST)[0200000200000];TIDVNGVLGYSTI/;WTSLMIPPITI/Phospho (ST)[0020000000000];SVLDSMRLXLH/Phospho (ST)[0200000000000]	19.220000;15.540000;14.500000;13.740000;12.350000;12.280000;12.060000;11.450000;11.420000	0.011967;0.027925;0.035481;0.042267;0.058210;0.059156;0.062230;0.071614;0.000000	3.680000;1.040000;0.760000;1.390000;0.070000;0.220000;0.610000;0.030000;NA	0.021582735007;0.009249249153;0.007279582604;0.006110918315;0.004437174194;0.004366228685;0.004150557918;0.003606670590;0.003581842444	0.094759;0.040356;0.031730;0.026621;0.019313;0.019004;0.018063;0.015692;0.015584
query2997	612.353	1222.69	2	1222.7	-0.008373	-	MKVIASYLLAV	L	114	1	11	Oxidation (M)	[0100000000000]	33.81	1	0	Solyc11g067100.1.1	17.2	0.934619	11.8455	cyr_090306_meja_005_bi6_2_p.01887.01887.2_45.220mins	1222.696136[-0.005000];1222.630585[0.060551];1222.655746[0.035390];1222.637970[0.053166];1222.618286[0.072850];1222.604126[0.087010];1222.595840[0.095296];1222.595810[0.095326];1222.643433[0.047703]	LFNIAYSLALV/;ETALHIAANVGQ/;VDSIHLADLGAL/;TLRMKYLPDA/Oxidation (M)[000010000000];RKIGRSELAN/Phospho (ST)[000000200000];TSSXALSVTGTSN/;GLVDSINKLAN/Phospho (ST)[0000020000000];KLELAASNLAN/Phospho (ST)[0000000200000];KNKQKSLLAN/Phospho (ST)[000000200000]	16.610000;13.480000;13.480000;11.700000;11.650000;11.330000;10.890000;10.520000;10.520000	0.021827;0.044875;0.044875;0.067608;0.068391;0.073621;0.081470;0.088716;0.000000	3.130000;0.000000;1.780000;0.050000;0.320000;0.440000;0.370000;0.000000;NA	0.017808792898;0.008662325190;0.008662325190;0.005749558319;0.005683743669;0.005280006819;0.004771275384;0.004381617712;0.004381617712	0.078040;0.037784;0.037784;0.025042;0.024755;0.022992;0.020771;0.019071;0.019071
query13322	1088.14	2174.26	2	2174.18	0.084234	K	VQLILNHVIPKFYTFDDL	Q	248	104	121			38.58	1	0	Solyc07g053540.1.1	16.64	0.93236	11.698	cyr_090306_meja_005_bi6_2_p.02119.02119.2_51.343mins	2174.246323[0.015493];2174.200989[0.060827];2174.202057[0.059759];2174.188766[0.073050];2174.212234[0.049582];2174.293884[-0.032068];2174.199570[0.062246];2174.267395[-0.005579];2174.256821[0.004995]	KFLQAQSKVDVLAGIGFAAVL/;ENPTKKCKLKLSVQIRXI/Phospho (ST)[00000000000020000000];INLTMTLSAVTLNISLLATW/;ILNYWNLLQADKSKLWIG/;RAIAGVLLLAGKKGMRTDPK/Phospho (ST)[0000000000000000020000];RAIINSYKYTLIQIRIPL/;WIKALTWVMIQVLMAGLVA/2 Oxidation (M)[000000000100001000000];YKKAAKKVILIDELTKGQE/;ARAKREKLKMEKILKSTE/Oxidation (M)[00000000001000000000]	21.940000;19.030000;17.990000;16.310000;15.620000;15.620000;15.620000;15.620000;15.470000	0.006397;0.012503;0.015885;0.023388;0.027416;0.027416;0.027416;0.027416;0.000000	2.910000;1.040000;1.680000;0.690000;0.000000;0.000000;0.000000;0.150000;NA	0.020210802574;0.010341500559;0.008139234474;0.005528197621;0.004716106021;0.004716106021;0.004716106021;0.004716106021;0.004555998367	0.088674;0.045146;0.035493;0.024075;0.020530;0.020530;0.020530;0.020530;0.019832
query11980	1025.55	2049.09	2	2049.03	0.062261	L	LEASSATVGGKEYYYLSVL	T	259	186	204			29.65	1	0	Solyc07g044860.2.1	19.78	0.932264	11.6918	cyr_090307_meja_05_2_bi3_p.01961.01961.2_46.803mins	2049.054733[0.038137];2049.099823[-0.006953];2049.148346[-0.055476];2049.008438[0.084432];2049.014481[0.078389];2049.014481[0.078389];2049.016907[0.075963];2049.016907[0.075963];2049.019958[0.072912]	IARSLTVYGISYKIDITG/Phospho (ST)[00000000000000000200];NRWKYLLSXLMILAVI/Phospho (ST)[000000002000000000];VNGGRVDYLRVFKIQTKG/;PERLYYSIRVAGNLFTA/Phospho (ST)[0000000000000000200];NIAELSLYIIYCEXITV/Phospho (ST)[0000000000000000200];NIAELSLYIIYCEXITV/Phospho (ST)[0000000000000000200];AGNKGMMVDLNNKMNVAKV/Oxidation (M)[000000010000000000000];AGNKGMMVDLNNKMNVAKV/Oxidation (M)[000000100000000000000];ISAAE…	9.870000;9.620000;9.620000;9.560000;9.000000;9.000000;6.790000;6.790000;6.560000	0.103039;0.109144;0.109144;0.110662;0.125893;0.125893;0.209411;0.209411;0.000000	0.250000;0.000000;0.060000;0.560000;0.000000;2.210000;0.000000;0.230000;NA	0.009807058191;0.009258459949;0.009258459949;0.009131429116;0.008026731804;0.008026731804;0.004825460359;0.004825460359;0.004576555698	0.042802;0.040396;0.040396;0.039839;0.035000;0.035000;0.021007;0.021007;0.019921
query2881	405.594	1213.76	3	1213.73	0.031546	D;D	PKTRYPVVVR	F;F	139	107	116			32.76	0	0	Solyc06g083680.2.1;Solyc09g063130.2.1	19.29	0.930303	11.5678	cyr_090307_meja_05_2_bi8_p.01262.01262.3_26.743mins	1213.693130[0.067939];1213.681915[0.079154];1213.718262[0.042807];1213.674011[0.087058];1213.669601[0.091468];1213.669601[0.091468];1213.674026[0.087043];1213.707047[0.054022];1213.677856[0.083213]	PLHAAVIQKHT/;PQTLVPPPKTH/;PKTRYNPLLI/;PKLMQEVKIE/;KKFRGKAATK/Phospho (ST)[000000000200];KKFRGKTAAK/Phospho (ST)[000000020000];KPMAVISATLAP/Oxidation (M)[00010000000000];KGIIADFPQLL/;PKDERSTIRI/	13.470000;13.470000;12.820000;12.310000;11.480000;11.480000;10.680000;10.340000;10.080000	0.044978;0.044978;0.052240;0.058749;0.071121;0.071121;0.085507;0.092470;0.000000	0.000000;0.650000;0.510000;0.830000;0.000000;0.800000;0.340000;0.260000;NA	0.010955299015;0.010955299015;0.009432444005;0.008387339754;0.006928260932;0.006928260932;0.005762676440;0.005328736381;0.005019081360	0.047841;0.047841;0.041159;0.036579;0.030194;0.030194;0.025099;0.023204;0.021852
query4412	672.378	1342.74	2	1342.75	-0.005169	A	RDLISDGIEVVK	F	118	28	39			48.02	1	0	Solyc09g089510.2.1	15.64	0.925622	11.2856	cyr_090307_meja_05_2_bi3_p.01604.01604.2_37.513mins	1342.709229[0.031223];1342.756821[-0.016369];1342.702698[0.037754];1342.811829[-0.071377];1342.664581[0.075871];1342.699356[0.041096];1342.720459[0.019993];1342.781998[-0.041546];1342.734390[0.006062]	SSAVDKLQPTAIN/;SSIAAKAQLEVAR/;QNGAIIDMRVIN/;CRKLKKLEVLN/;LKHSPNLEVLN/Phospho (ST)[0000200000000];TSQHFRIEVLGG/;QKNIDTGLGLER/;ANVSVKLSSLVLN/;DSIVPSLISSVIN/	32.380000;30.760000;27.130000;25.050000;25.050000;25.050000;24.340000;23.270000;23.270000	0.000578;0.000839;0.001936;0.003126;0.003126;0.003126;0.003681;0.004710;0.000000	1.620000;3.630000;2.080000;0.000000;0.000000;0.710000;1.070000;0.000000;NA	0.025260018589;0.017395369807;0.007541082045;0.004671255969;0.004671255969;0.004671255969;0.003966739363;0.003100513780;0.003100513780	0.111112;0.076212;0.032875;0.020335;0.020335;0.020335;0.017262;0.013486;0.013486
query12940	713.378	2137.11	3	2137.03	0.080284	L	LGGDDGSLAFIPGNFSVSAGEK	I	171	76	97			32.21	1	0	Solyc04g082010.1.1	16.1	0.925311	11.2674	cyr_090307_meja_05_2_bi7_p.01686.01686.3_39.463mins	2137.107147[0.005913];2137.075470[0.037590];2137.049652[0.063408];2137.019135[0.093925];2137.083755[0.029305];2137.024918[0.088142];2137.082001[0.031059];2137.019135[0.093925];2137.085388[0.027672]	TLSKIYLVSSYSPKKGXSL/Phospho (ST)[000000000000200000000];WNSLKSTIMNLARLPGLQ/Oxidation (M) Phospho (ST)[00000002010000000000];LIYLQTYAPTTLATARDF/Phospho (ST)[00000020000000000000];SSTASSTIVNPPLSPESASLL/Phospho (ST)[00000000000000200000000];SSQGMVGSQALVAFQKSDGKL/;GKDTFSIVPTSAISGEGIPDM/Oxidation (M)[00000000000000000000010];KLATVNPELNFDIDRILS/Phospho (ST)[00002000000000000000];SANVLIPEDGIELTDATKAT/Ph…	16.110000;11.440000;11.250000;11.080000;11.070000;10.440000;10.410000;9.690000;9.630000	0.024491;0.071779;0.074989;0.077983;0.078163;0.090365;0.090991;0.107399;0.000000	4.670000;0.190000;0.170000;0.010000;0.630000;0.030000;0.720000;0.060000;NA	0.022713695989;0.007749752068;0.007418016734;0.007133255972;0.007116849939;0.006155846880;0.006113470328;0.005179499657;0.005108434258	0.099782;0.033788;0.032336;0.031090;0.031019;0.026817;0.026632;0.022553;0.022243
query794	455.249	908.483	2	908.519	-0.035746	L	RVLSLHAN	R	660	97	104			38.78	1	0	Solyc03g111670.2.1	16.1	0.920314	10.9862	cyr_090307_meja_05_2_bi10_p.01717.01717.2_35.419mins	908.507965[-0.024531];908.555573[-0.072139];908.544342[-0.060908];908.519226[-0.035792];908.580734[-0.097300];908.519180[-0.035746];908.519180[-0.035746];908.486847[-0.003413];908.463699[0.019735]	GVVLSHANL/;RVLSKHIG/;RVLSLPQP/;RVVVVSHGG/;RLVVVLPN/;RSIVAIHN/;RSVIALHN/;VGLWHAIGG/;TIKDMKSA/Oxidation (M)[0000010000]	22.680000;22.680000;22.680000;14.150000;12.080000;11.450000;11.450000;11.450000;11.370000	0.005395;0.005395;0.005395;0.038459;0.061944;0.071614;0.071614;0.071614;0.000000	0.000000;0.000000;8.530000;2.070000;0.630000;0.000000;0.000000;0.080000;NA	0.022591021805;0.022591021805;0.022591021805;0.003169099499;0.001967595745;0.001701907197;0.001701907197;0.001701907197;0.001670843890	0.099237;0.099237;0.099237;0.013785;0.008554;0.007398;0.007398;0.007398;0.007262
query16230	843.09	2526.25	3	2526.22	0.032905	S	TDEAMNDYITKVKQLLEEAAASA	-	91	68	90	Oxidation (M)	[0000010000000000000000000]	26.85	1	0	Solyc08g075690.2.1	17.6	0.919282	10.9303	cyr_090307_meja_05_2_bi3_p.02245.02245.3_54.204mins	2526.281311[-0.032509];2526.153534[0.095268];2526.164764[0.084038];2526.291672[-0.042870];2526.157379[0.091423];2526.157379[0.091423];2526.309662[-0.060860];2526.302917[-0.054115];2526.215897[0.032905]	LANALDPGSTISLTVNDIVSSSAAPN/;CLLSFATEKDADCDRYKSLVGI/Phospho (ST)[000000000000000000200000];CIAEDIKSHAMTVGKYQIVNPN/Oxidation (M) Phospho (ST)[000000002001000000000000];SHKLSELIISDVKHLSNSLVPM/Phospho (ST)[000000000000000020000000];PASDSAAFLKIGGDGNLRIMDGNQ/Phospho (ST)[00000200000000000000000000];PASDSAAFLKIGGDGNLRIMDGNQ/Phospho (ST)[00020000000000000000000000];SFVTSAMSFILYGLTVLIGSVLI/Oxidation (M) P…	9.250000;8.510000;6.990000;6.090000;5.680000;5.680000;5.610000;5.580000;5.170000	0.118850;0.140929;0.199986;0.246037;0.270396;0.270396;0.274789;0.276694;0.000000	0.740000;1.520000;0.900000;0.410000;0.000000;0.070000;0.030000;0.410000;NA	0.015975294823;0.013472521390;0.009493992445;0.007717006780;0.007021806894;0.007021806894;0.006909535966;0.006861971055;0.006243798539	0.069940;0.058908;0.041429;0.033645;0.030603;0.030603;0.030112;0.029904;0.027201
query5850	751.375	1500.73	2	1500.75	-0.018641	D;D	DQQDIARGKGLVDS	L;L	440	82	95			36.16	0	0	Solyc09g011080.2.1;Solyc10g086580.1.1	18.28	0.918643	10.896	cyr_090307_meja_05_2_bi3_p.01217.01217.2_27.415mins	1500.725876[0.008718];1500.743332[-0.008738];1500.798325[-0.063731];1500.760590[-0.025996];1500.770126[-0.035532];1500.722504[0.012090];1500.713852[0.020742];1500.704544[0.030050];1500.729706[0.004888]	TGQISLILMTKNS/Oxidation (M) Phospho (ST)[000000000120000];GQWDLARQGLDRS/;LTSNAPGIRKWRC/;ENKDVLKANKMPD/;QDSRVKITFSLK/Phospho (ST)[00000000200000];LDFARSAIVTELS/Phospho (ST)[000000000020000];KQVMKFMCAALES/Oxidation (M)[000000010000000];RRSSKDDTKKNS/Phospho (ST)[00000000200000];RVSGSTSLSKANKS/Phospho (ST)[0000000002000000]	17.880000;17.700000;17.350000;16.760000;16.630000;15.920000;13.760000;12.420000;12.420000	0.016293;0.016982;0.018408;0.021086;0.021727;0.025586;0.042073;0.057280;0.000000	0.180000;0.350000;0.590000;0.130000;0.710000;2.160000;1.340000;0.000000;NA	0.013650441824;0.013096242506;0.012082219139;0.010547431375;0.010236387279;0.008692540212;0.005286237953;0.003882815087;0.003882815087	0.059691;0.057252;0.052792;0.046050;0.044685;0.037916;0.023019;0.016896;0.016896
query4665	685.884	1369.75	2	1369.76	-0.002392	H	RDLKPSNVLLDT	D	821	624	635			42.4	1	0	Solyc02g030300.2.1	15.29	0.910607	10.487	cyr_090306_meja_005_bi6_2_p.01588.01588.2_37.424mins	1369.745285[0.008839];1369.667633[0.086491];1369.764557[-0.010433];1369.760574[-0.006450];1369.655624[0.098500];1369.737030[0.017094];1369.674164[0.079960];1369.674164[0.079960];1369.656403[0.097721]	NLPTSLANVTVLE/;KIATNKGVXDTI/Phospho (ST)[00000000000200];YALLVGGAFLAIY/;KTPHTVFVILDT/;LSMIGRAIFCPM/2 Oxidation (M)[00010000000010];ATLFKRIILDX/Phospho (ST)[0020000000000];VLDSLKSSITVE/Phospho (ST)[00000000200000];VLDSLKSSITVE/Phospho (ST)[00000002000000];MSLLVSPSLLSGA/Oxidation (M) Phospho (ST)[010000200000000]	27.110000;25.720000;22.860000;22.750000;19.860000;19.610000;19.280000;19.280000;19.000000	0.001945;0.002679;0.005176;0.005309;0.010328;0.010940;0.011803;0.011803;0.000000	1.390000;2.860000;0.110000;2.890000;0.250000;0.330000;0.000000;0.280000;NA	0.026935870705;0.019558296188;0.010123507728;0.009870315132;0.005073772833;0.004789950427;0.004439468908;0.004439468908;0.004162277379	0.118585;0.085782;0.044190;0.043079;0.022091;0.020852;0.019323;0.019323;0.018114
