# Supplementary material for: An improved scoring method for the identification of endogenous peptides based on the Mascot MS/MS ion search
Source: Royal Society of Chemistry journal article supplement (doi:10.1039/c8an02141d), 2019-01-01
Supplement: c8an02141d5.xlsx [file c8an02141d5.xlsx]

## Sheet: target sequences
PSMId	score	q-value	posterior_error_prob	peptide	proteinIds
query:16738;rank:1	0	0.0204082	0.00166389	X.LEVLLGGDDGSLAFIPGNFSVSAGEK.X	Solyc04g082010.1.1
query:6876;rank:1	0	0.0204082	0.00166389	X.VLGLGTGSTAAFVVAKL.X	Solyc01g097460.2.1
query:5779;rank:1	0	0.0204082	0.00166389	X.VLGLGTGSTAAFVVAK.X	Solyc01g097460.2.1
query:8278;rank:1	-0.0145811	0.0204082	0.00166389	X.INSPISGEIVEVNTKL.X	Solyc08g007040.2.1
query:6339;rank:1	-0.19243	0.0204082	0.00166389	X.IMVTSTSLMLFAGR.X	Solyc08g006930.2.1
query:7339;rank:1	-0.196022	0.0204082	0.00166389	X.EGVESFDIDIKEQK.X	Solyc11g007200.1.1
query:6812;rank:1	-0.267287	0.0204082	0.00166389	X.INSPISGEIVEVNTK.X	Solyc08g007040.2.1
query:17240;rank:1	-0.305442	0.0204082	0.00166389	X.FNKVNYANVSTNNYALDEVEEVK.X	Solyc09g063130.2.1
query:7494;rank:1	-0.307225	0.0204082	0.00166389	X.EGVETFDIDLKEQK.X	Solyc05g055310.2.1
query:10727;rank:1	-0.311369	0.0204082	0.00166389	X.EGRSTPVKFSAHLKEDE.X	Solyc01g087520.2.1
query:15759;rank:1	-0.32212	0.0204082	0.00166389	X.AVEYVKSGMVLGLGTGSTAAFVVAK.X	Solyc01g097460.2.1
query:6462;rank:1	-0.340655	0.0204082	0.00166389	X.NKVNYANVSTNNYA.X	Solyc09g063130.2.1
query:14358;rank:1	-0.345904	0.0204082	0.00166389	X.FNKVNYANVSTNNYALDEVE.X	Solyc09g063130.2.1
query:4993;rank:1	-0.348391	0.0204082	0.00166389	X.KVQLILNHVIPK.X	Solyc07g053540.1.1
query:10702;rank:1	-0.356817	0.0204082	0.00166389	X.NKVNYANVSTNNYALDE.X	Solyc09g063130.2.1
query:13107;rank:1	-0.365005	0.0204082	0.0349418	X.NKVNYANVSTNNYALDEVE.X	Solyc09g063130.2.1
query:16023;rank:1	-0.402615	0.0204082	0.0349418	X.ASGSDENDVVVIGGGPGGYVAAIKAAQ.X	Solyc05g053300.2.1
query:3359;rank:1	-0.405166	0.0204082	0.0349418	X.EGVESFDIDIK.X	Solyc11g007200.1.1
query:870;rank:1	-0.418981	0.0204082	0.0349418	X.IIIIIIII.X	Solyc07g020720.1.1
query:10442;rank:1	-0.425203	0.0204082	0.0349418	X.VLGLGTGSTAAFVVAKLGEL.X	Solyc01g097460.2.1
query:8183;rank:1	-0.429479	0.0204082	0.0349418	X.IMVTSTSLMLFAGRF.X	Solyc08g006930.2.1
query:4789;rank:1	-0.435005	0.0204082	0.0349418	X.LLYQEPVLGPVR.X	caseinbeta
query:3814;rank:1	-0.444621	0.0204082	0.0349418	X.LSIAVGLPNIGPH.X	Solyc03g121540.2.1
query:7782;rank:1	-0.45766	0.0204082	0.0349418	X.VGDYGFDPFGLGKPAE.X	Solyc09g014520.2.1
query:4818;rank:1	-0.513009	0.0204082	0.0349418	X.KFVENAATSFSIA.X	Solyc07g044860.2.1
query:3961;rank:1	-0.531402	0.0204082	0.0349418	X.LTVIGGASERVPT.X	Solyc06g063370.2.1
query:2397;rank:1	-0.551734	0.0204082	0.0349418	X.IIIIIIIIII.X	Solyc07g020720.1.1
query:4085;rank:1	-0.552559	0.0204082	0.0349418	X.SSYADELVKTAK.X	Solyc02g084440.2.1
query:13427;rank:1	-0.555602	0.0204082	0.0349418	X.DMPIQAFLLYQEPVLGPVR.X	caseinbeta
query:6984;rank:1	-0.568457	0.0204082	0.0349418	X.APQEKGFAAFATDFL.X	Solyc11g062190.1.1
query:5170;rank:1	-0.578264	0.0204082	0.0349418	X.AFIPGNFSVSAGEK.X	Solyc04g082010.1.1
query:13460;rank:1	-0.585164	0.0204082	0.0349418	X.KVQLILNHVIPKFYTFDD.X	Solyc07g053540.1.1
query:6227;rank:1	-0.586407	0.0204082	0.0349418	X.ENLELIVGLVKEGK.X	Solyc09g059020.2.1
query:5640;rank:1	-0.587927	0.0204082	0.0349418	X.MTNLNLPSIFVPL.X	Solyc01g007350.2.1
query:8262;rank:1	-0.588755	0.0204082	0.0349418	X.KVQLILNHVIPKFY.X	Solyc07g053540.1.1
query:5311;rank:1	-0.605194	0.0204082	0.0349418	X.LEIAGLISPHFLK.X	Solyc01g107330.2.1
query:6590;rank:1	-0.621938	0.0204082	0.0349418	X.KYGDKSVYFDLED.X	Solyc06g066640.2.1
query:6408;rank:1	-0.64484	0.0204082	0.0349418	X.LLNAAGETYSVTLSE.X	Solyc04g082010.1.1
query:3529;rank:1	-0.645807	0.0204082	0.0349418	X.EGVETFDIDLK.X	Solyc05g055310.2.1
query:17144;rank:1	-0.651291	0.0204082	0.0349418	X.APTKIGNGYSLIAIEESPDGGLIGYL.X	Solyc05g009470.2.1
query:9553;rank:1	-0.65217	0.0204082	0.0349418	X.VLNEANLTNAVLVRSVL.X	Solyc08g079110.2.1
query:5057;rank:1	-0.657688	0.0204082	0.0349418	X.FLSKVDYLLGKQ.X	Solyc07g044860.2.1
query:13136;rank:1	-0.659069	0.0204082	0.0349418	X.ISMSEEDLLNAAGETYSVTL.X	Solyc04g082010.1.1
query:7243;rank:1	-0.66025	0.0204082	0.0349418	X.MTNLNLPSIFVPLVG.X	Solyc01g007350.2.1
query:9979;rank:1	-0.665147	0.0204082	0.0349418	X.NNSLSYEISFTSKRSE.X	Solyc06g062950.1.1
query:18818;rank:1	-0.666535	0.0204082	0.0349418	X.AYGEAANVFGKPKENTDFLPYNGDGFK.X	Solyc07g044860.2.1
query:10052;rank:1	-0.673592	0.0204082	0.0730838	X.LAAVKINAADIDIIANEL.X	Solyc12g099240.1.1
query:16164;rank:1	-0.676613	0.0204082	0.0730838	X.FYVITWESPKEQIFEMPTGGAA.X	Solyc06g054260.1.1
query:5690;rank:1	-0.677036	0.0204082	0.0730838	X.APHQGAGMVGKVTVN.X	Solyc04g082010.1.1
query:2480;rank:1	-0.682836	0.0307692	0.0730838	X.RLATSGANFAR.X	Solyc08g013670.2.1
query:76;rank:1	-0.682931	0.0307692	0.0730838	X.IIIIIII.X	Solyc07g020720.1.1
query:15424;rank:1	-0.684268	0.0307692	0.0730838	X.IEKFQSEEQQQTEDELQDK.X	caseinbeta
query:3524;rank:1	-0.692361	0.0307692	0.0730838	X.FTFGLVYGSMK.X	Solyc01g110540.2.1
query:4434;rank:1	-0.692913	0.0307692	0.0730838	X.VEEDKLELATSL.X	Solyc07g066610.2.1
query:12285;rank:1	-0.697472	0.0307692	0.0730838	X.KVQLILNHVIPKFYTFD.X	Solyc07g053540.1.1
query:5163;rank:1	-0.698992	0.0307692	0.0730838	X.IIGVGVVLGLKNIGA.X	Solyc08g006930.2.1
query:13848;rank:1	-0.700373	0.0307692	0.0730838	X.ASGSDENDVVVIGGGPGGYVAAIK.X	Solyc05g053300.2.1
query:9140;rank:1	-0.703274	0.0307692	0.0730838	X.RTEEQALSLNIPLSTL.X	Solyc01g097460.2.1
query:10349;rank:1	-0.703826	0.0307692	0.0730838	X.MVSAHASQQIYTRATNT.X	Solyc02g069850.2.1
query:12989;rank:1	-0.704946	0.0307692	0.0730838	X.SHNDPLFHFGFGLTTKPVK.X	Solyc11g071640.1.1
query:6665;rank:1	-0.707043	0.0307692	0.0730838	X.VQLILNHVIPKFY.X	Solyc07g053540.1.1
query:3731;rank:1	-0.708472	0.0307692	0.0730838	X.ASLFLHVQKNK.X	Solyc01g007350.2.1
query:5048;rank:1	-0.718469	0.0307692	0.0730838	X.IQTAVRLVLPGEL.X	Solyc05g055440.1.1
query:5281;rank:1	-0.720385	0.0307692	0.0730838	X.LSIAVGLPNIGPHF.X	Solyc03g121540.2.1
query:19344;rank:1	-0.722061	0.0307692	0.0730838	X.ELLVLLAGLMPNSGTTTSVVAMCVNTQN.X	Solyc10g007360.2.1
query:11304;rank:1	-0.725653	0.038835	0.0730838	X.TGAVTPPGFRFVVTSNGEM.X	Solyc05g005480.2.1
query:11136;rank:1	-0.72658	0.038835	0.0730838	X.GDDGSLAFIPGNFSVSAGEK.X	Solyc04g082010.1.1
query:3794;rank:1	-0.730678	0.038835	0.0730838	X.PVGNWIGQRPY.X	Solyc00g174340.1.1
query:19834;rank:1	-0.730764	0.038835	0.0730838	X.AGIGLGTSNSLMTCTWALDFWYGGKLMA.X	Solyc02g087410.2.1
query:5827;rank:1	-0.736279	0.038835	0.0730838	X.APQEKGFAAFATDF.X	Solyc11g062190.1.1
query:8795;rank:1	-0.738683	0.038835	0.0730838	X.PPLAVFQLDKVLVPSQ.X	Solyc07g053540.1.1
query:7290;rank:1	-0.741629	0.038835	0.0730838	X.YAVGASFKGTDFSNAV.X	Solyc03g082890.2.1
query:6307;rank:1	-0.741828	0.038835	0.0730838	X.RTSAFTFGLVYGSM.X	Solyc01g110540.2.1
query:9318;rank:1	-0.746236	0.038835	0.149723	X.EGRSTPVKFSAHLKED.X	Solyc01g087520.2.1
query:2881;rank:1	-0.74817	0.038835	0.149723	X.PKTRYPVVVR.X	Solyc09g063130.2.1
query:20829;rank:1	-0.753143	0.038835	0.149723	X.KVGTTGTISALMSRELDSKPSASTTS.X	Solyc07g064320.1.1
query:15418;rank:1	-0.757678	0.038835	0.149723	X.KVQLILNHVIPKFYTFDDLQ.X	Solyc07g053540.1.1
query:3635;rank:1	-0.760507	0.038835	0.149723	X.KVQLILNHVIP.X	Solyc07g053540.1.1
query:3230;rank:1	-0.760879	0.038835	0.149723	X.VFVRADLNVPL.X	Solyc07g066610.2.1
query:5850;rank:1	-0.762122	0.038835	0.149723	X.DQQDIARGKGLVDS.X	Solyc09g011080.2.1
query:13471;rank:1	-0.763365	0.038835	0.149723	X.AYFGKTDSEGGFESGAVATANL.X	Solyc07g044860.2.1
query:3128;rank:1	-0.771371	0.038835	0.149723	X.SLSVDAGVDEKD.X	Solyc01g087520.2.1
query:6718;rank:1	-0.773864	0.038835	0.149723	X.SPSITYRFDPLLT.X	Solyc05g009000.2.1
query:15849;rank:1	-0.777888	0.038835	0.149723	X.RAFFVFGDSLVDSGNNNYLATTA.X	Solyc11g006250.1.1
query:5557;rank:1	-0.779869	0.038835	0.149723	X.KYGDKSVYFDLE.X	Solyc06g066640.2.1
query:14598;rank:1	-0.784086	0.038835	0.149723	X.VGDYGFDPFGLGKPAEYLQFD.X	Solyc09g014520.2.1
query:13322;rank:1	-0.784777	0.038835	0.149723	X.VQLILNHVIPKFYTFDDL.X	Solyc07g053540.1.1
query:12342;rank:1	-0.785053	0.038835	0.149723	X.QSTAGNTSPTTVPGTT.X	Solyc01g010310.2.1
query:16238;rank:1	-0.786573	0.038835	0.149723	X.RFEQIMQETTTNKQITSPTT.X	Solyc02g087190.1.1
query:1631;rank:1	-0.787597	0.038835	0.149723	X.GAGMVGKVTVN.X	Solyc04g082010.1.1
query:4502;rank:1	-0.788507	0.038835	0.149723	X.LLNAAGETYSVTL.X	Solyc04g082010.1.1
query:7519;rank:1	-0.789479	0.038835	0.149723	X.VTFGDTNLAIFRVAK.X	Solyc01g009080.2.1
query:844;rank:1	-0.790717	0.038835	0.149723	X.GMVGKVTVN.X	Solyc04g082010.1.1
query:2778;rank:1	-0.792236	0.038835	0.149723	X.FSLANVTKVNL.X	Solyc06g076480.2.1
query:794;rank:1	-0.792236	0.038835	0.149723	X.RVLSLHAN.X	Solyc03g111670.2.1
query:2987;rank:1	-0.792433	0.038835	0.149723	X.NKVNYANVSTN.X	Solyc09g063130.2.1
query:5843;rank:1	-0.792513	0.038835	0.149723	X.NKVNYANVSTNNY.X	Solyc09g063130.2.1
query:8355;rank:1	-0.793958	0.038835	0.149723	X.MIYDVNSPLFRSFL.X	Solyc06g083340.2.1
query:3908;rank:1	-0.794585	0.038835	0.149723	X.IQTAVRLVLPGE.X	Solyc05g055440.1.1
query:6604;rank:1	-0.7979	0.038835	0.149723	X.TTRTPSFLGLDVSAD.X	Solyc03g044150.2.1
query:15026;rank:1	-0.798729	0.038835	0.149723	X.ITVYDDRSFTFILKTPPASVL.X	Solyc08g083350.2.1
query:12334;rank:1	-0.799972	0.038835	0.149723	X.IISTKPPKEYLESKKTSE.X	Solyc10g076710.1.1
query:4527;rank:1	-0.801077	0.038835	0.149723	X.MLFAGRFGLAPSA.X	Solyc08g006930.2.1
query:6833;rank:1	-0.802726	0.0471698	0.293139	X.PIAIFTINKVLMPK.X	Solyc10g005960.1.1
query:11978;rank:1	-0.803011	0.0471698	0.293139	X.LEASSATVGGKEYYYLSVL.X	Solyc07g044860.2.1
query:4665;rank:1	-0.803426	0.0471698	0.293139	X.RDLKPSNVLLDT.X	Solyc02g030300.2.1
query:8371;rank:1	-0.806222	0.0560748	0.293139	X.FNKVNYANVSTNNYA.X	Solyc09g063130.2.1
query:11577;rank:1	-0.80909	0.0619469	0.293139	X.AVQSKPPSKRDPPKMQTD.X	Solyc05g051750.2.1
query:10105;rank:1	-0.811714	0.0619469	0.293139	X.RLATSGANFARAYTVQF.X	Solyc08g013670.2.1
query:4138;rank:1	-0.812562	0.0619469	0.293139	X.KFVENAATSFSI.X	Solyc07g044860.2.1
query:23814;rank:1	-0.812923	0.0619469	0.293139	X.RAFFVFGDSLVDSGNNNYLATTARADSPPYGIDYPTRRATGRFSN.X	Solyc11g006250.1.1
query:17884;rank:1	-0.81359	0.0619469	0.293139	X.VFVRADLNVPLDDSQNITDDTRIR.X	Solyc07g066610.2.1
query:10231;rank:1	-0.814048	0.0619469	0.293139	X.IFYFEAGQGKTPLGALGL.X	Solyc01g105030.2.1
query:3791;rank:1	-0.81945	0.0695652	0.293139	X.LNIHEYQGAEL.X	Solyc06g083790.2.1
query:14340;rank:1	-0.821108	0.0695652	0.293139	X.KVQLILNHVIPKFYTFDDL.X	Solyc07g053540.1.1
query:186;rank:1	-0.823042	0.0756303	0.293139	X.PVENIGAK.X	Solyc01g028810.2.1
query:9764;rank:1	-0.82318	0.0756303	0.293139	X.RDLSDGIEVLEILENE.X	Solyc09g089540.2.1
query:16995;rank:1	-0.826495	0.0756303	0.293139	X.LVGVIFYSSSLLSGIIGAFLLPVT.X	Solyc04g074870.2.1
query:21175;rank:1	-0.827462	0.0756303	0.293139	X.KPINVMNLESCKQTSCSLSKSADRCNTM.X	Solyc04g009450.1.1
query:6377;rank:1	-0.831745	0.0833333	0.293139	X.ATVGGKEYYYLSVL.X	Solyc07g044860.2.1
query:16230;rank:1	-0.837131	0.0991736	0.293139	X.TDEAMNDYITKVKQLLEEAAASA.X	Solyc08g075690.2.1
query:16864;rank:1	-0.837408	0.106557	0.293139	X.MKSAIDYFETTRARPSLTATLLI.X	Solyc03g097500.2.1
query:9771;rank:1	-0.838514	0.111111	0.293139	X.LGILAGGALLVYNTSALAQ.X	Solyc07g066310.2.1
query:7149;rank:1	-0.839013	0.111111	0.293139	X.PPLAVFQLDKVLVPS.X	Solyc07g053540.1.1
query:1777;rank:1	-0.839798	0.111111	0.293139	X.VSNFDPVKR.X	Solyc05g025600.1.1
query:1983;rank:1	-0.840171	0.111111	0.293139	X.KSQAMVLAAS.X	Solyc07g008950.2.1
query:5151;rank:1	-0.841138	0.113636	0.293139	X.GAAKPTGGPARVPIQ.X	Solyc04g076310.2.1
query:3696;rank:1	-0.841829	0.113636	0.293139	X.IFFLCFPLVSP.X	Solyc02g091450.2.1
query:12086;rank:1	-0.84258	0.113636	0.293139	X.FQSEEQQQTEDELQDK.X	caseinbeta
query:13587;rank:1	-0.842934	0.113636	0.293139	X.EGRSTPVKFSAHLKEDEFE.X	Solyc01g087520.2.1
query:9891;rank:1	-0.843625	0.113636	0.293139	X.IVPPVLMVKSVALVCRN.X	Solyc01g088240.2.1
query:6211;rank:1	-0.843763	0.113636	0.293139	X.AEEAPAATEEKPAPAG.X	Solyc06g054260.1.1
query:2997;rank:1	-0.84685	0.120301	0.293139	X.MKVIASYLLAV.X	Solyc11g067100.1.1
query:10931;rank:1	-0.848852	0.130435	0.293139	X.VQLILNHVIPKFYTFD.X	Solyc07g053540.1.1
query:10338;rank:1	-0.850808	0.130435	0.293139	X.STSFKLNGNSTLQISH.X	Solyc10g008270.2.1
query:12940;rank:1	-0.851991	0.130435	0.293139	X.LGGDDGSLAFIPGNFSVSAGEK.X	Solyc04g082010.1.1
query:7461;rank:1	-0.851991	0.130435	0.293139	X.FNKVNYANVSTNNY.X	Solyc09g063130.2.1
query:5000;rank:1	-0.853571	0.130435	0.293139	X.QVLFIVIVSVASQ.X	Solyc03g114680.2.1
query:10155;rank:1	-0.854538	0.134752	0.293139	X.LSISLLFLNILLLRFV.X	Solyc06g084430.2.1
query:15492;rank:1	-0.854856	0.134752	0.293139	X.IPLTGPNSVVGRALVVHELEDDL.X	Solyc11g066390.1.1
query:10766;rank:1	-0.855142	0.134752	0.293139	X.LEVLLGGDDGSLAFIPGNF.X	Solyc04g082010.1.1
query:7848;rank:1	-0.85813	0.15493	0.293139	X.LEVLLGGDDGSLAFIPG.X	Solyc04g082010.1.1
query:7708;rank:1	-0.859097	0.160839	0.293139	X.ATVGGKEYYYLSVLT.X	Solyc07g044860.2.1
query:12276;rank:1	-0.860193	0.163265	0.293139	X.AESVSPSLKNFLLSISAGGVV.X	Solyc05g025600.1.1
query:14707;rank:1	-0.860616	0.163265	0.293139	X.MSIFLVIISSLFNLLLVVAY.X	Solyc07g006420.1.1
query:1444;rank:1	-0.86105	0.163265	0.293139	X.PIAIFTINK.X	Solyc10g005960.1.1
query:4412;rank:1	-0.861717	0.163265	0.293139	X.RDLISDGIEVVK.X	Solyc09g089510.2.1
query:11765;rank:1	-0.861898	0.165563	0.293139	X.NKVNYANVSTNNYALDEV.X	Solyc09g063130.2.1
query:9163;rank:1	-0.861998	0.165563	0.293139	X.LEVLLGGDDGSLAFIPGN.X	Solyc04g082010.1.1
query:9145;rank:1	-0.861998	0.165563	0.293139	X.TDCSVVHNSCNSSL.X	Solyc08g066510.2.1
query:19712;rank:1	-0.862136	0.165563	0.293139	X.TLFILVATFMLDRSGRRRLLLTSVGGMV.X	Solyc01g109460.2.1
query:23387;rank:1	-0.862964	0.168831	0.293139	X.KIWMMKKLRCIHIREAFYLPSPGRKSILNKHLAIGMPNV.X	Solyc08g074250.1.1
query:5435;rank:1	-0.862964	0.168831	0.293139	X.LTKDDIKVYGAIL.X	Solyc11g072190.1.1
query:19709;rank:1	-0.863103	0.168831	0.293139	X.MLLHTNHVLGHVPQMLLQMNKVKMVL.X	Solyc09g059930.1.1
query:9895;rank:1	-0.863931	0.173077	0.293139	X.KKKPKVQLKRLVEFL.X	Solyc10g019220.1.1
query:20907;rank:1	-0.864386	0.173077	0.293139	X.TIIAPPTTSRTTRARASSSASRASPRTTAPPTT.X	Solyc04g024620.1.1
query:12352;rank:1	-0.865451	0.176101	0.293139	X.IPQNERTKTTSSILVSLI.X	Solyc07g064980.2.1
query:15549;rank:1	-0.865727	0.176101	0.293139	X.FYVITWESPKEQIFEMPTGGA.X	Solyc06g054260.1.1
query:3956;rank:1	-0.866006	0.176101	0.293139	X.VPVVVSEYLSQ.X	Solyc02g064770.2.1
query:23478;rank:1	-0.868214	0.184049	0.293139	X.RSNLISVPSLSISTSSIHDISCASSVEQMVPPDAEME.X	Solyc11g065950.1.1
query:18706;rank:1	-0.868214	0.184049	0.293139	X.HMPPVWCGTSSTTYQYSPPGGGYN.X	Solyc08g028990.1.1
query:11054;rank:1	-0.86849	0.184049	0.293139	X.KVQLILNHVIPKFYTF.X	Solyc07g053540.1.1
query:18164;rank:1	-0.868766	0.184049	0.293139	X.GGKAAPGYEVAKKIIKLCHVVADKVNN.X	Solyc02g077680.2.1
query:8848;rank:1	-0.869427	0.189024	0.293139	X.GSSKVSKLGTKKSRKS.X	Solyc05g014130.2.1
query:9360;rank:1	-0.869595	0.193939	0.293139	X.PLSSLLSSNASTIN.X	Solyc01g091380.2.1
query:12360;rank:1	-0.871667	0.216867	0.293139	X.KYEVPPTYASPPPPPPTY.X	Solyc01g097700.1.1
query:3146;rank:1	-0.872634	0.221557	0.293139	X.GKSSRRKTAVM.X	Solyc01g005330.2.1
query:9669;rank:1	-0.873049	0.225434	0.293139	X.VKVAKAILEGLTKSSPN.X	Solyc09g005290.1.1
query:14879;rank:1	-0.874154	0.225434	0.293139	X.KKKKESGPTGKFMELTSRPH.X	Solyc11g008750.1.1
query:15863;rank:1	-0.874876	0.225434	0.293139	X.VLGFIGIKMILDFFGYHVSTE.X	Solyc10g085980.1.1
query:4441;rank:1	-0.875372	0.225434	0.293139	X.QLFGAPRIYKR.X	Solyc05g007510.2.1
query:4333;rank:1	-0.875669	0.225434	0.293139	X.MKVIASYLLAVL.X	Solyc11g067100.1.1
query:4071;rank:1	-0.875669	0.225434	0.293139	X.KLPEWSPIQVL.X	Solyc06g007800.2.1
query:23396;rank:1	-0.87664	0.241379	0.293139	X.VFESASYGKVLVLDGIVQLTEKDECAYQEMIAHLPLCSIKS.X	Solyc03g007240.2.1
query:3691;rank:1	-0.879403	0.274286	0.293139	X.MLFAGRFGLAPS.X	Solyc08g006930.2.1
query:13594;rank:1	-0.880094	0.274725	0.293139	X.HVKPAMRLLKLHLLFGAFV.X	Solyc06g007110.2.1
query:16224;rank:1	-0.880492	0.274725	0.293139	X.KGLIRMVSAHASQQIYTRATNT.X	Solyc02g069850.2.1
query:7922;rank:1	-0.880492	0.274725	0.293139	X.GSLAFIPGNFSVSAGEK.X	Solyc04g082010.1.1
query:21149;rank:1	-0.880508	0.274725	0.293139	X.LCNFLPANLPGLRVPEAPGVRLKRDGLTALHP.X	Solyc11g066710.1.1
query:14339;rank:1	-0.880523	0.274725	0.293139	X.VQLILNHVIPKFYTFDDLQ.X	Solyc07g053540.1.1
query:5808;rank:1	-0.880968	0.274725	0.293139	X.PPSKRDPPKMQTD.X	Solyc05g051750.2.1
query:21894;rank:1	-0.881018	0.274725	0.293139	X.FVVLCMLIAHGEALSCGQVTKLLFPCLAYLRDKGG.X	Solyc09g018010.2.1
query:10924;rank:1	-0.881613	0.277487	0.293139	X.VYFKMVKLQQSTANN.X	Solyc05g013890.1.1
query:9302;rank:1	-0.882857	0.277487	0.293139	X.PKFIPKRFTSLRNVP.X	Solyc01g103740.2.1
query:11931;rank:1	-0.883396	0.277487	0.293139	X.ISMSEEDLLNAAGETYSVT.X	Solyc04g082010.1.1
query:22024;rank:1	-0.883891	0.277487	0.293139	X.KNVGMHNAVRFVNPLFYQKDKPIDGCAKLVEEM.X	Solyc07g062560.2.1
query:13311;rank:1	-0.884288	0.277487	0.293139	X.FNKVNYANVSTNNYALDEV.X	Solyc09g063130.2.1
query:21524;rank:1	-0.884929	0.277487	0.293139	X.FNVQVPGSTHYSMVFYFVMKELTSGSLLQ.X	Solyc12g096050.1.1
query:17657;rank:1	-0.885205	0.277487	0.293139	X.RSNMEQIQQSKAKLLGVQGLVHRN.X	Solyc07g052700.2.1
query:4022;rank:1	-0.88562	0.277487	0.293139	X.QFRWIVVIFV.X	Solyc02g030170.2.1
query:6037;rank:1	-0.885675	0.277487	0.293139	X.GFVACTIAAVLAVIGN.X	Solyc07g061970.2.1
query:14885;rank:1	-0.886034	0.283505	0.293139	X.DGAAYEISAGDLINRISFQAQQ.X	Solyc08g076920.2.1
query:5446;rank:1	-0.886115	0.283505	0.293139	X.TYVPVTRKGYW.X	Solyc02g032940.2.1
query:8827;rank:1	-0.886269	0.283505	0.293139	X.LAAVKINAADIDIIANE.X	Solyc12g099240.1.1
query:16736;rank:1	-0.886587	0.287179	0.293139	X.FKSNREQLVAVLNLLMLCCKIR.X	Solyc02g089260.2.1
query:9928;rank:1	-0.886782	0.290816	0.293139	X.QRVQALRGLRLENRM.X	Solyc06g073650.1.1
query:22660;rank:1	-0.888021	0.304569	0.293139	X.NQQVSKEIESLQDKIKDQMDASSKGSLTMSQLAEKI.X	Solyc04g014380.2.1
query:15610;rank:1	-0.888382	0.306533	0.293139	X.SHGCTGVAARACGLVGLEPTRVSE.X	Solyc03g120910.2.1
query:22943;rank:1	-0.888548	0.306533	0.293139	X.GATGTGKSGLSVDVATHFGGEIINLEKMHVYKVLEIVTN.X	Solyc11g020430.1.1
query:3447;rank:1	-0.889211	0.31441	0.293139	X.IALHSQVITEF.X	Solyc09g090570.2.1
query:18792;rank:1	-0.890178	0.31441	0.293139	X.TSADMRESDFSGSTFNGAYLEKAVAYK.X	Solyc08g079110.2.1
query:17116;rank:1	-0.890593	0.31441	0.293139	X.SEKGTYTFYCAPHQGAGMVGKVTVN.X	Solyc04g082010.1.1
query:5755;rank:1	-0.890731	0.31441	0.293139	X.LISQVISSLTASLR.X	Solyc02g087880.2.1
query:13542;rank:1	-0.891145	0.31441	0.293139	X.TVILLRKEMESALDCLKGV.X	Solyc01g108670.2.1
query:12726;rank:1	-0.891145	0.31441	0.293139	X.PAKHEWLRSRPLGDELVN.X	Solyc01g096160.2.1
query:18134;rank:1	-0.891421	0.31441	0.293139	X.IQTAVRLVLPGELAKHAVSEGTKAVTK.X	Solyc05g055440.1.1
query:9911;rank:1	-0.89225	0.31441	0.293139	X.KANPSQDGEDFLDKLV.X	Solyc02g081860.1.1
query:11819;rank:1	-0.892309	0.31441	0.293139	X.RVTPQPGVPPEEAGAAVAAES.X	Solyc01g007330.2.1
query:840;rank:1	-0.892388	0.31441	0.293139	X.RVMKKKN.X	Solyc03g007360.2.1
query:12038;rank:1	-0.89251	0.31441	0.293139	X.AESGSEGSSEGSDAHSQN.X	Solyc08g005290.2.1
query:20386;rank:1	-0.892609	0.31441	0.293139	X.KSTSQLLDDFVWDDDMIDYVRGIRTTPGG.X	Solyc12g019020.1.1
query:17438;rank:1	-0.893006	0.31441	0.293139	X.KLTLTAPKEPEFETAQRVRPTTV.X	Solyc07g053790.1.1
query:8191;rank:1	-0.893494	0.31441	0.293139	X.IQKESTLHLVLRLR.X	Solyc11g005670.1.1
query:6950;rank:1	-0.893494	0.31441	0.293139	X.DYTSTDLDFTN.X	Solyc01g094060.2.1
query:16107;rank:1	-0.893908	0.31441	0.293139	X.ANGSPATEGSSGDVANYMGQMAMA.X	Solyc10g080770.1.1
query:19670;rank:1	-0.893996	0.31441	0.293139	X.FARKVTKTEMGITHLQRIGIGLFLSVI.X	Solyc04g005790.2.1
query:19923;rank:1	-0.894322	0.31441	0.293139	X.RYQPLMNEAAKALLQKLLKTNTSGRLE.X	Solyc06g072750.2.1
query:4629;rank:1	-0.894492	0.31441	0.293139	X.RSIVKEVQEVT.X	Solyc09g083060.2.1
query:14952;rank:1	-0.894596	0.31441	0.293139	X.KLRMFVVQEPVVAASCLIAGF.X	Solyc01g096090.2.1
query:5272;rank:1	-0.894596	0.31441	0.293139	X.FTFILKTPPASVL.X	Solyc08g083350.2.1
query:13355;rank:1	-0.894599	0.31441	0.66759	X.LIVIYLQGFRVVLPVRSK.X	Solyc10g007390.2.1
query:4835;rank:1	-0.894599	0.31441	0.66759	X.LQEEIVDLKGEL.X	Solyc06g072470.2.1
query:1228;rank:1	-0.895086	0.31441	0.66759	X.EIPAGVDASK.X	Solyc04g082010.1.1
query:20973;rank:1	-0.895151	0.31441	0.66759	X.RIMLLWQVVYEHIASIVQSTTMPCSLVEKA.X	Solyc02g088290.2.1
query:5726;rank:1	-0.895264	0.31441	0.66759	X.FETFAAPFTKRGL.X	Solyc06g066640.2.1
query:19084;rank:1	-0.895289	0.31441	0.66759	X.TGSSGSASTSHTMPPTSGPTSLIN.X	Solyc08g077310.2.1
query:17917;rank:1	-0.895842	0.31441	0.66759	X.IVLNLGFSHPVRMEVPAGLQVKVEE.X	Solyc12g100160.1.1
query:5326;rank:1	-0.895842	0.31441	0.66759	X.KPIISGRKMISE.X	Solyc05g013260.1.1
query:22762;rank:1	-0.895978	0.31441	0.66759	X.PKVFFDLTIGGAPAGRVVMELFADTTPKTAENFRALCTG.X	Solyc01g111170.2.1
query:331;rank:1	-0.896572	0.316017	0.66759	X.TYSEVVSG.X	Solyc01g088750.2.1
query:17358;rank:1	-0.896598	0.316017	0.66759	X.SSSIEDTFSLGGCTITIIAPGPN.X	Solyc10g054800.1.1
query:11478;rank:1	-0.896947	0.318966	0.66759	X.LLLLVLGIALVFVPVTFV.X	Solyc03g006100.2.1
query:4346;rank:1	-0.897085	0.321888	0.66759	X.QMKCLTISSKSL.X	Solyc05g024320.1.1
query:18962;rank:1	-0.898355	0.333333	0.66759	X.RQTADNLKLPTIPTKKRRPTPSGY.X	Solyc10g009430.2.1
query:16073;rank:1	-0.898467	0.333333	0.66759	X.RKTEISKALSTIKVISKVVNPL.X	Solyc11g065650.1.1
query:7306;rank:1	-0.899019	0.333333	0.66759	X.LQKMIEKLCETGKI.X	Solyc02g083780.1.1
query:4575;rank:1	-0.899019	0.333333	0.66759	X.SVKSLTVGQDVF.X	Solyc12g014050.1.1
query:17747;rank:1	-0.899986	0.341667	0.66759	X.VALSKYPKLLEKSLNPDISKAYRN.X	Solyc02g091720.1.1
query:5003;rank:1	-0.90004	0.341667	0.66759	X.QEVVGLDRMVEE.X	Solyc04g050620.2.1
query:16327;rank:1	-0.900337	0.341667	0.66759	X.MLLLLFLSLSFAVIIIVVVIFV.X	Solyc12g062980.1.1
query:10919;rank:1	-0.900535	0.348548	0.66759	X.RDKQLYPKLAALVQGMV.X	Solyc08g068100.2.1
query:8178;rank:1	-0.900677	0.349794	0.66759	X.CRICLKLNFNQLLK.X	Solyc03g071670.1.1
query:5942;rank:1	-0.900677	0.349794	0.66759	X.KDVREYIEHRY.X	Solyc08g080990.2.1
query:16469;rank:1	-0.901229	0.356275	0.66759	X.PLNRPMIVLPNSPINTPDRLKV.X	Solyc02g088830.2.1
query:305;rank:1	-0.901363	0.356275	0.66759	X.LGDFGDSK.X	Solyc02g083810.2.1
query:23404;rank:1	-0.901506	0.356275	0.66759	X.FNSNRNSIPHRRQSTPLKMSNAGSTRELLPVTNTLVSQPS.X	Solyc09g065570.2.1
query:9717;rank:1	-0.901526	0.356275	0.66759	X.FETFAAPFTKRGLLLK.X	Solyc06g066640.2.1
query:8977;rank:1	-0.901644	0.35743	0.66759	X.ISSSMIARPTRVVL.X	Solyc03g097830.2.1
query:12309;rank:1	-0.901724	0.35743	0.66759	X.FNKVNYANVSTNNYALDE.X	Solyc09g063130.2.1
query:15920;rank:1	-0.902058	0.36	0.66759	X.TQKVKLKILFEKLVYDVLTK.X	Solyc04g078360.1.1
query:11211;rank:1	-0.902058	0.36255	0.66759	X.PFVRHYVSTSSRVLMV.X	Solyc01g088000.2.1
query:21708;rank:1	-0.902411	0.369048	0.66759	X.VAEETAEPALPVAEDISEAKMSAKPRSFSISKFS.X	Solyc01g106750.1.1
query:19228;rank:1	-0.903012	0.375494	0.66759	X.MTMMMMMMTMMMTLMTMMTW.X	Solyc00g165080.1.1
query:23059;rank:1	-0.903163	0.380392	0.66759	X.AKGLSFLHSYNKTKICHGNFTSSNILIDHNGNACISDICL.X	Solyc11g069960.1.1
query:9940;rank:1	-0.903163	0.380392	0.66759	X.TTIAKTEDYKVPSIPD.X	Solyc12g038170.1.1
query:19380;rank:1	-0.903578	0.381323	0.66759	X.SLVAEVVAEGSGTVDHVADASLVSTILN.X	Solyc09g007340.2.1
query:18492;rank:1	-0.903578	0.381323	0.66759	X.KNSGGVGMIIINEKGDGITTSVSAHVLP.X	Solyc08g007700.1.1
query:18250;rank:1	-0.903716	0.384615	0.66759	X.SPSGGSGTTAVSAIAAGGDATTTGSNS.X	Solyc12g096390.1.1
query:18323;rank:1	-0.903841	0.384615	0.66759	X.SVSAGEKITFKNNAGFPHNVVFDEDE.X	Solyc04g082010.1.1
query:21191;rank:1	-0.903903	0.384615	0.66759	X.RNREIRSETSPEVHFEKASNVKPKLIACRK.X	Solyc07g039190.2.1
query:3604;rank:1	-0.903992	0.385455	0.66759	X.LYQEPVLGPVR.X	caseinbeta
query:11807;rank:1	-0.904127	0.385455	0.66759	X.PKKRVVITGTGLVSVFGN.X	Solyc02g070790.2.1
query:22963;rank:1	-0.904821	0.385455	0.66759	X.IAQGMQYLHEHKPMVIHRDLKPSNIFLDDSMHVRIA.X	Solyc08g062140.1.1
query:18539;rank:1	-0.905097	0.385455	0.66759	X.AIVGLALLVIGFVGMNWWMLSRIQN.X	Solyc02g081080.2.1
query:21855;rank:1	-0.905236	0.385455	0.66759	X.ERTPTSKTVATTCKTGKKRSSTAASRN.X	Solyc03g111590.2.1
query:7195;rank:1	-0.905236	0.385455	0.66759	X.GSSAGMYMSCNSCG.X	Solyc08g075840.2.1
query:3869;rank:1	-0.90527	0.385455	0.66759	X.PPILEPKKKEL.X	Solyc08g083350.2.1
query:10906;rank:1	-0.905365	0.385455	0.66759	X.PQFTGSVGMFLSYCMVF.X	Solyc02g082410.2.1
query:9536;rank:1	-0.905488	0.385455	0.66759	X.SPSIATEFGIRSIPTVM.X	Solyc07g063190.2.1
query:15958;rank:1	-0.905842	0.385455	0.66759	X.KNTSPNQSLFMVYMIFLLVSF.X	Solyc11g006850.1.1
query:9331;rank:1	-0.906064	0.385455	0.66759	X.LKSTFRVLNLIHSN.X	Solyc12g040530.1.1
query:10393;rank:1	-0.906083	0.385455	0.66759	X.HSSSAGNAAQNSNAPS.X	Solyc10g055450.1.1
query:1575;rank:1	-0.906203	0.385455	0.66759	X.GITDIGLVPR.X	Solyc06g009160.2.1
query:17157;rank:1	-0.90638	0.385455	0.66759	X.VGDYGFDPFGLGKPAEYLQFDLDS.X	Solyc09g014520.2.1
query:14953;rank:1	-0.906755	0.385455	0.66759	X.LNAVSERTRKMYVEMSRQCG.X	Solyc08g060840.1.1
query:18037;rank:1	-0.906893	0.387681	0.66759	X.KNGEKKDAIIGAVPKSTLTTSIE.X	Solyc07g063190.2.1
query:969;rank:1	-0.907308	0.395683	0.824047	X.QGPKPGRPT.X	Solyc09g014450.2.1
query:1422;rank:1	-0.907446	0.395683	0.824047	X.SMGITITMK.X	Solyc01g103060.2.1
query:9014;rank:1	-0.908064	0.396429	0.824047	X.LSGGIPIQIIADDTIVF.X	Solyc09g005270.2.1
query:15385;rank:1	-0.908163	0.396429	0.824047	X.APSQESSPPKNGASSTVMSF.X	Solyc07g064240.2.1
query:2117;rank:1	-0.908275	0.398577	0.824047	X.KKDVMKELP.X	Solyc06g065730.2.1
query:12399;rank:1	-0.908361	0.400709	0.824047	X.AGHIFQAEKIIKEMPMQP.X	Solyc02g062630.1.1
query:7832;rank:1	-0.908827	0.40493	0.824047	X.TVSFLPSALCRPSIT.X	Solyc06g069220.1.1
query:22637;rank:1	-0.908956	0.40493	0.824047	X.RKMGHIKHYKPTNSTIRNRGHDISMHWHGDAGS.X	Solyc09g008420.2.1
query:12939;rank:1	-0.908965	0.409091	0.824047	X.FGSLFASSTASGSLPSQAPVF.X	Solyc02g085580.2.1
query:11520;rank:1	-0.909082	0.409091	0.824047	X.VPSTGLAKALDLAKVAIGVVS.X	Solyc02g069230.2.1
query:18515;rank:1	-0.909749	0.425087	0.824047	X.VPRTRPSMSFSTSHLLMSLQDS.X	Solyc10g084250.1.1
query:2815;rank:1	-0.910046	0.428571	0.824047	X.QQSVSLLQVK.X	Solyc02g076790.2.1
query:6481;rank:1	-0.910347	0.428571	1	X.KESTIETTYT.X	Solyc05g056520.2.1
query:21469;rank:1	-0.910485	0.428571	1	X.ILVLAASCDAGGIAIYWGQNGGEGTLAETCATKN.X	Solyc01g095260.1.1
query:2513;rank:1	-0.910607	0.428571	1	X.TPLSFGPFNST.X	Solyc10g077100.1.1
query:21893;rank:1	-0.910899	0.428571	1	X.YLTAMVAGLSVIRSFLDAKIGNGIKPKALCLGVGGG.X	Solyc11g007550.1.1
query:17184;rank:1	-0.910988	0.428571	1	X.KMDSLESVSSIVYEDNPEKF.X	Solyc03g111660.2.1
query:17987;rank:1	-0.911036	0.428571	1	X.IKADNKDITITLTKVMKRAIEVPL.X	Solyc11g030670.1.1
query:5984;rank:1	-0.911274	0.428571	1	X.GIGEVVSTSGREHAI.X	Solyc04g056660.1.1
query:3595;rank:1	-0.911655	0.428571	1	X.CANIVSVEEVK.X	Solyc12g015920.1.1
query:1958;rank:1	-0.911866	0.428571	1	X.AALPPLPLGMS.X	Solyc11g069820.1.1
query:21920;rank:1	-0.912143	0.428571	1	X.PPTLTRLHGVKKATSISVGETHLLIITSLYHPGY.X	Solyc01g056570.2.1
query:16985;rank:1	-0.912143	0.428571	1	X.VHDSDFGLGKPNLIFFGMKDTQ.X	Solyc12g005440.1.1
query:7706;rank:1	-0.912281	0.428571	1	X.PVPKRGRVSPSNLP.X	Solyc12g007300.1.1
query:4322;rank:1	-0.912323	0.428571	1	X.RRTLCKYPGKN.X	Solyc07g054170.2.1
query:7535;rank:1	-0.912971	0.450331	1	X.KSSRRLTGASPGRSGG.X	Solyc01g006720.2.1
query:11062;rank:1	-0.913248	0.453947	1	X.PRPWLRPRPRPHWPI.X	Solyc09g097940.1.1
query:16239;rank:1	-0.913371	0.453947	1	X.GWSKRKRSLRTKIGTINSTT.X	Solyc05g050860.1.1
query:18822;rank:1	-0.913386	0.455738	1	X.TRVLRPEIPNKCPSIVANIMKQCWH.X	Solyc04g026210.2.1
query:2324;rank:1	-0.913524	0.457516	1	X.NILVGAIIGGPN.X	Solyc11g040340.1.1
query:11285;rank:1	-0.913662	0.457792	1	X.IGFLGMPIAAAIKMIPVGS.X	Solyc04g077870.2.1
query:18591;rank:1	-0.913938	0.457792	1	X.IIFVVLAATAGAYGFAASETSHKDIRN.X	Solyc08g075970.2.1
query:19686;rank:1	-0.914215	0.459547	1	X.NITLPGQQSLLVTEVASVSKGPVILVIMSG.X	Solyc01g104950.2.1
query:4340;rank:1	-0.914629	0.459877	1	X.GVHLVFSRKTN.X	Solyc08g067370.1.1
query:11904;rank:1	-0.914999	0.459877	1	X.TPKIIALSILIGLLLGVNN.X	Solyc02g082170.1.1
query:22951;rank:1	-0.915182	0.459877	1	X.NEFQKGSSHMAAVEKVSKKDCNLVSDRAGVKGGESKFCN.X	Solyc09g064870.2.1
query:14083;rank:1	-0.915277	0.459877	1	X.FSVSVVHGIGEVVSTSGREHAI.X	Solyc04g056660.1.1
query:5370;rank:1	-0.915494	0.459877	1	X.QATESSTDAMM.X	Solyc03g096960.2.1
query:17581;rank:1	-0.915596	0.459877	1	X.SIPPRVSEIRILNYLNLSRNHLN.X	Solyc01g103530.2.1
query:7938;rank:1	-0.915596	0.459877	1	X.QKGTGLTNMKGKGSTGT.X	Solyc10g012030.2.1
query:16878;rank:1	-0.915753	0.459877	1	X.SLLALWSMFTGTVTLRWSAGNLN.X	Solyc02g085480.2.1
query:12320;rank:1	-0.915872	0.459877	1	X.QRHMSSSLSSNSADMS.X	Solyc08g083070.2.1
query:16028;rank:1	-0.916089	0.459877	1	X.FRLHPPIPLLVPRESMEDVKL.X	Solyc03g111950.2.1
query:19850;rank:1	-0.916149	0.459877	1	X.TTRTPSFLGLDVSADYFPESNAMGDVIVGV.X	Solyc03g044150.2.1
query:15933;rank:1	-0.91623	0.459877	1	X.SIATVFSDQSSSTGETTPNDFH.X	Solyc05g054570.2.1
query:22328;rank:1	-0.916485	0.459877	1	X.SIQLVTEHFTSWKKPKEQKAIIIIVLMAPLY.X	Solyc07g063520.2.1
query:17408;rank:1	-0.916516	0.459877	1	X.RREKLAKLRSTAVTKRRNTKN.X	Solyc03g096830.2.1
query:22384;rank:1	-0.916563	0.459877	1	X.GGRNPLSDWSENETFILLDAWGTRFVRHGRKSL.X	Solyc12g043090.1.1
query:6373;rank:1	-0.917116	0.467692	1	X.WMLRGLTQGSVCPD.X	Solyc01g010680.1.1
query:15142;rank:1	-0.917254	0.470948	1	X.PQVIVGRRKMGKIIIYLKGPD.X	Solyc03g007140.2.1
query:13729;rank:1	-0.917278	0.470948	1	X.KKKIEIEKITKQTARMV.X	Solyc01g098070.1.1
query:21499;rank:1	-0.917392	0.473214	1	X.KLIPKIQVMARSSPLDKHTLVKQLRTTFN.X	Solyc02g092450.2.1
query:18559;rank:1	-0.917476	0.473214	1	X.TNPSLSKNTNARFMIPDLSVLSWDN.X	Solyc11g008820.1.1
query:13089;rank:1	-0.917564	0.473214	1	X.IMRFLKVLLARTNKLAHN.X	Solyc03g096600.1.1
query:5672;rank:1	-0.917755	0.473214	1	X.PSDASVLRVLYT.X	Solyc12g055720.1.1
query:19743;rank:1	-0.917773	0.473214	1	X.QRMSYMVGYGPHYPQRIHHRGSSVPSV.X	Solyc09g010210.2.1
query:22174;rank:1	-0.917806	0.473214	1	X.QPNWVPSLSSQQLSAAAGRRVGSVVAKYRGQVIH.X	Solyc01g106980.1.1
query:12322;rank:1	-0.918083	0.473214	1	X.DDTGSTSAITITTVTN.X	Solyc03g120190.2.1
query:6498;rank:1	-0.918221	0.473214	1	X.KNDMGGAAAVLGAAKAL.X	Solyc12g010020.1.1
query:20509;rank:1	-0.918231	0.473214	1	X.DKVLRTYAVINERGPAFKILLVMSVSILT.X	Solyc10g044470.1.1
query:15398;rank:1	-0.918497	0.480712	1	X.DGLSSTKSIISKIREIVLKMN.X	Solyc03g119830.2.1
query:9253;rank:1	-0.918773	0.482353	1	X.LGRLSNLAILKLGNNSI.X	Solyc04g051510.1.1
query:20348;rank:1	-0.918911	0.482353	1	X.QTGTKTVLEKMLTLRDPEPLKMPKGKV.X	Solyc01g066460.2.1
query:17415;rank:1	-0.918994	0.482353	1	X.FTKDVEILKLTSIALPIVGLCELGN.X	Solyc04g076950.2.1
query:22504;rank:1	-0.919184	0.482558	1	X.TYPRSLIIPLLSSKDTQHKQQVESIAYATESSKKN.X	Solyc09g083310.1.1
query:2487;rank:1	-0.919259	0.482558	1	X.ETLRPALQR.X	Solyc10g083220.1.1
query:2041;rank:1	-0.919259	0.482558	1	X.NMVLQLLVF.X	Solyc02g081340.2.1
query:15569;rank:1	-0.91928	0.482558	1	X.DTVTLIIKGMELELVKILRVF.X	Solyc09g005080.1.1
query:19044;rank:1	-0.919326	0.484058	1	X.KKSYSNSLSTSNNQTKLTNASS.X	Solyc04g055090.1.1
query:12508;rank:1	-0.91947	0.487106	1	X.LQDFSLKVKAGKTVAIVGGS.X	Solyc05g013890.1.1
query:2396;rank:1	-0.919754	0.487106	1	X.QPLLLILLLN.X	Solyc03g058620.1.1
query:15151;rank:1	-0.919878	0.487106	1	X.SIVISVLLMTFFAVSMMQRL.X	Solyc06g074310.2.1
query:7055;rank:1	-0.920155	0.487106	1	X.KSNSTVEMCGQVYR.X	Solyc08g042080.2.1
query:12519;rank:1	-0.920349	0.490028	1	X.LQVAAINTAMAALTKTVGVF.X	Solyc05g008350.2.1
query:12437;rank:1	-0.920614	0.490028	1	X.EMMKVTSSTFSSMN.X	Solyc01g068470.2.1
query:12882;rank:1	-0.920707	0.491477	1	X.QMLILMSKVTKNKMLLLN.X	Solyc12g005230.1.1
query:8665;rank:1	-0.920844	0.491525	1	X.QDFLGIVILLVINSTV.X	Solyc03g117150.2.1
query:21983;rank:1	-0.9209	0.491525	1	X.ATNLPVTLTTGHHQSNSTGALTINTSSLS.X	Solyc08g066910.1.1
query:22119;rank:1	-0.921538	0.5	1	X.RNESIMKSVRIVFPNVPHYACIWHLWKNVCVN.X	Solyc10g046890.1.1
query:19980;rank:1	-0.921674	0.5	1	X.HGANMLTKYLAEVGEKTPLTAATCINN.X	Solyc07g042500.2.1
query:22686;rank:1	-0.921812	0.5	1	X.SALKACSTLAFMQDGRKIHCLIFHTGFDMDELTS.X	Solyc04g064750.1.1
query:12223;rank:1	-0.921835	0.5	1	X.KPVKVVYISNPMKVNTSA.X	Solyc10g078440.1.1
query:3025;rank:1	-0.922089	0.501393	1	X.AFGAPTSTPAFGT.X	Solyc04g007280.2.1
query:13840;rank:1	-0.922615	0.511873	1	X.GGLTITGFSVLSKILDKQKIL.X	Solyc08g016160.2.1
query:20072;rank:1	-0.922641	0.511873	1	X.SAGSHSNLEASSSLSSNLTTSATKFV.X	Solyc12g056260.1.1
query:17617;rank:1	-0.922779	0.511873	1	X.KDARKVFDEMPERSLVSWNVM.X	Solyc05g006800.1.1
query:10395;rank:1	-0.922918	0.511873	1	X.NVGDDTFTTYVKDAN.X	Solyc05g005540.2.1
query:7613;rank:1	-0.923056	0.511873	1	X.LSIGYARQVFNEMN.X	Solyc01g006920.2.1
query:7800;rank:1	-0.923123	0.511873	1	X.TRRIHKIFASAVAEA.X	Solyc05g009570.2.1
query:20043;rank:1	-0.92347	0.511873	1	X.RLTPSSDSSSPSSSSSCSPPLVTTSSN.X	Solyc03g117100.2.1
query:4111;rank:1	-0.923568	0.511873	1	X.SVQASKHSVQKN.X	Solyc06g069360.2.1
query:12520;rank:1	-0.923608	0.511873	1	X.PPSPPKITTHVITLPPPPLP.X	Solyc10g009140.2.1
query:13113;rank:1	-0.923854	0.511873	1	X.GFFWIPSLAGPTTVAARQTG.X	Solyc05g014050.2.1
query:20560;rank:1	-0.923915	0.511873	1	X.MQIFVKTLTGKTITLEVESSDTIDNVKAKI.X	Solyc11g005670.1.1
query:20860;rank:1	-0.923949	0.511873	1	X.GYVFIRKNCSCAYGMRKYLTNTTFTVRKN.X	Solyc03g121050.2.1
query:15232;rank:1	-0.924014	0.511873	1	X.ACAHASLAALSKDDTLTASQN.X	Solyc06g060120.2.1
query:10774;rank:1	-0.924023	0.511873	1	X.KEVIAAVQKSAVNARRN.X	Solyc02g077990.2.1
query:8475;rank:1	-0.924161	0.511873	1	X.IVNTFEELELEYVK.X	Solyc10g083860.1.1
query:5040;rank:1	-0.924299	0.511873	1	X.DSCDFELGTMN.X	Solyc09g091220.1.1
query:11515;rank:1	-0.924299	0.511873	1	X.TMKHLVTKKMILRTNV.X	Solyc04g047780.1.1
query:10656;rank:1	-0.924299	0.511873	1	X.SFSRYGDPYSSSSS.X	Solyc08g074320.1.1
query:12094;rank:1	-0.924311	0.511873	1	X.VQLILNHVIPKFYTFDD.X	Solyc07g053540.1.1
query:8536;rank:1	-0.924426	0.511873	1	X.PIAIFTINKVLMPKE.X	Solyc10g005960.1.1
query:23292;rank:1	-0.924437	0.515306	1	X.TLMLTLTMMLTLKLMFTLKLTLTLMLTLVLTLTLMSIL.X	Solyc03g065080.1.1
query:9036;rank:1	-0.924708	0.515306	1	X.EVGQITLVSDENENVK.X	Solyc04g056460.1.1
query:15299;rank:1	-0.924807	0.515306	1	X.DVAFPPGKMPNIYNALVVQGRD.X	Solyc01g007320.2.1
query:21712;rank:1	-0.924851	0.515306	1	X.RLFWIFLLSAMTFVMLASLKVMISIGLKKYA.X	Solyc06g051440.2.1
query:9677;rank:1	-0.924851	0.515306	1	X.KKSLISFAKGTTIKPCN.X	Solyc08g063060.1.1
query:20792;rank:1	-0.924902	0.515306	1	X.PLLAALIQLVKTGYTKAAQRLDGIYALLCVAK.X	Solyc04g050520.2.1
query:3094;rank:1	-0.924906	0.515306	1	X.QSSMHSGSLPAN.X	Solyc12g088010.1.1
query:5651;rank:1	-0.92499	0.515306	1	X.KSSSGTTSSSLD.X	Solyc09g009120.2.1
query:3896;rank:1	-0.924998	0.515306	1	X.KRMMPVEIIM.X	Solyc01g111870.1.1
query:10899;rank:1	-0.925093	0.515306	1	X.DINSSFGKGSVTRLGS.X	Solyc07g066320.2.1
query:2460;rank:1	-0.925128	0.515306	1	X.GLALNIPRPPN.X	Solyc04g005690.2.1
query:21541;rank:1	-0.925188	0.515306	1	X.IGSIISQWFPKINHVLANGLFPSLVGIVLCLLP.X	Solyc10g078470.1.1
query:14742;rank:1	-0.925188	0.515306	1	X.KDVMSILVQDRVPKFLEKL.X	Solyc10g019110.1.1
query:6820;rank:1	-0.925401	0.519084	1	X.SSLSASTRSSSPN.X	Solyc01g067490.2.1
query:18316;rank:1	-0.925542	0.520202	1	X.ERLSQAAFGAEILQTIGYIYTRQAA.X	Solyc04g063390.2.1
query:20141;rank:1	-0.925599	0.520202	1	X.ISATLVMALNNQKKTIVVATIGTTPIQ.X	Solyc02g069730.2.1
query:8729;rank:1	-0.925599	0.520202	1	X.MSVKVDTTHTSQFLG.X	Solyc04g078740.2.1
query:18319;rank:1	-0.926141	0.526448	1	X.FGRVYKGHLDRTGQVIAVKQLDRN.X	Solyc06g083500.2.1
query:13706;rank:1	-0.926233	0.528822	1	X.SVLVLASDLGVDARPFLTHQ.X	Solyc04g040200.2.1
query:3083;rank:1	-0.926233	0.528822	1	X.GRPTFRSTLN.X	Solyc00g112490.1.1
query:330;rank:1	-0.926618	0.533499	1	X.VPARSAPGS.X	Solyc12g088940.1.1
query:10235;rank:1	-0.926713	0.533499	1	X.GKLQNLTNLRLSGNQLN.X	Solyc01g087510.1.1
query:9206;rank:1	-0.926713	0.533499	1	X.SVSSATSQSIPTF.X	Solyc06g074000.1.1
query:7870;rank:1	-0.926713	0.533499	1	X.KNTEANTNKVVGTYG.X	Solyc07g053130.2.1
query:14147;rank:1	-0.926986	0.544335	1	X.GPRANGRSVPSKPSAEEDQLV.X	Solyc01g103540.2.1
query:13431;rank:1	-0.926999	0.544335	1	X.KPLKPPRAPATRLSFSLLGG.X	Solyc08g007910.2.1
query:10596;rank:1	-0.926999	0.544335	1	X.GKKKEKKKKPIIPLVAD.X	Solyc01g103700.2.1
query:9249;rank:1	-0.927383	0.565111	1	X.ARIHHIFQSIFVKSL.X	Solyc08g006600.2.1
query:4090;rank:1	-0.927571	0.565534	1	X.KNVATASVKASR.X	Solyc06g050550.2.1
query:1898;rank:1	-0.927581	0.565534	1	X.TQATHPLPPN.X	Solyc08g074390.2.1
query:17368;rank:1	-0.927614	0.565534	1	X.SIVHTVKNWLGVTIVSLHLKIY.X	Solyc06g009450.1.1
query:14145;rank:1	-0.927666	0.565534	1	X.LKVLNISYCIVTEDPPLEPM.X	Solyc03g026400.1.1
query:12585;rank:1	-0.927666	0.565534	1	X.FIRTASTIYKKIQDGVFD.X	Solyc07g056150.2.1
query:19734;rank:1	-0.928524	0.578692	1	X.GLGGGGGGGLGGGLYTGGGGGGLGGGGGGGLGGGLYIGGGGG.X	Solyc11g068630.1.1
query:20926;rank:1	-0.928581	0.582126	1	X.SLVPSASADEYTKVANRMVSMSSSHVPSV.X	Solyc04g049860.1.1
query:16384;rank:1	-0.928619	0.583133	1	X.IDEIQDNFHELKSQLKSGLHLS.X	Solyc10g078160.1.1
query:13982;rank:1	-0.92881	0.584135	1	X.LKNLVESNLVMLSKRSCGT.X	Solyc05g007640.2.1
query:6244;rank:1	-0.928869	0.58753	1	X.YIFLRALKYIVF.X	Solyc05g009510.1.1
query:2740;rank:1	-0.929	0.590909	1	X.NLSSSRVIFV.X	Solyc10g079690.1.1
query:2582;rank:1	-0.929134	0.595238	1	X.VGHVKPYSIT.X	Solyc08g076990.2.1
query:9000;rank:1	-0.929364	0.595238	1	X.SKGMAPAPPPPPMTSN.X	Solyc02g078660.2.1
query:10528;rank:1	-0.92941	0.5962	1	X.IDLKTKKPMKKKPLFV.X	Solyc06g069020.2.1
query:21719;rank:1	-0.930049	0.616114	1	X.VLIGGILPFGAVFIELFFILTSIWLNQYYYI.X	Solyc06g062590.2.1
query:20417;rank:1	-0.930144	0.617021	1	X.CDSKRMFRPGKKAVIIGISVLFSSLVSN.X	Solyc06g050690.2.1
query:11291;rank:1	-0.930239	0.617925	1	X.ILPLIISSCVTIAIHVPL.X	Solyc04g007530.2.1
query:487;rank:1	-0.930454	0.623529	1	X.QKDGISLT.X	Solyc01g097590.2.1
query:15480;rank:1	-0.930653	0.632319	1	X.YASVLNLYCRLGLYSNAEMVF.X	Solyc04g008570.2.1
query:16039;rank:1	-0.930653	0.632319	1	X.SGSLHPAGNFSESFSGDRHN.X	Solyc12g011050.1.1
query:20953;rank:1	-0.930792	0.633178	1	X.GDGITSMVCISLFISLITTISDTSWYG.X	Solyc07g026910.1.1
query:4677;rank:1	-0.93093	0.64186	1	X.VESEKNLLLSKL.X	Solyc07g056370.2.1
query:12762;rank:1	-0.931002	0.64186	1	X.NLDTYNILISAMFVRKK.X	Solyc03g113750.1.1
query:15073;rank:1	-0.931097	0.642691	1	X.SSSHSGNSTPSSPLSPTSN.X	Solyc03g044620.2.1
query:1915;rank:1	-0.931482	0.65127	1	X.TGLVNVGATFV.X	Solyc06g054270.2.1
query:5863;rank:1	-0.93162	0.65127	1	X.QKILQHALLLPTE.X	Solyc05g008540.2.1
query:13120;rank:1	-0.931759	0.654462	1	X.RGVGGRVSLPNTIWKMVK.X	Solyc05g007610.2.1
query:10541;rank:1	-0.931759	0.654462	1	X.KDGYWKSTLEGGGVDII.X	Solyc11g017460.1.1
query:17842;rank:1	-0.931764	0.654462	1	X.KKKGKLPKDARQKLITWWELHY.X	Solyc04g077210.2.1
query:1222;rank:1	-0.931841	0.654462	1	X.FVPMAPPPN.X	Solyc01g005130.2.1
query:3677;rank:1	-0.932035	0.662896	1	X.AMISTILAYWI.X	Solyc08g005880.2.1
query:1946;rank:1	-0.932035	0.662896	1	X.TPSPKDTAAN.X	Solyc02g082920.2.1
query:20913;rank:1	-0.932449	0.662896	1	X.GLAVGATVLLNVMFAGPISGASMNPARSLGPAIVS.X	Solyc02g071920.2.1
query:7818;rank:1	-0.932449	0.662896	1	X.ITILFLLSPITTHSN.X	Solyc02g080180.1.1
query:21698;rank:1	-0.932526	0.662896	1	X.SPDDKLLAILGDSPECLLADAQSGKVVSNLKGHLD.X	Solyc04g072890.2.1
query:20915;rank:1	-0.932831	0.675676	1	X.SNSPFKLVILHAKPTPASVIGLAVGPGSVEAFS.X	Solyc06g009050.2.1
query:3986;rank:1	-0.932831	0.675676	1	X.ADRSARLAVGAH.X	Solyc07g053180.2.1
query:1134;rank:1	-0.93293	0.678571	1	X.ASTSISTRF.X	Solyc09g074450.1.1
query:15271;rank:1	-0.93303	0.678571	1	X.IKPRMRSNRQSQWSFFSEN.X	Solyc01g066890.1.1
query:12186;rank:1	-0.933129	0.678571	1	X.IAKQEMKKLEEETSKYGG.X	Solyc08g022030.2.1
query:6867;rank:1	-0.933129	0.678571	1	X.IISKQMVGILISVW.X	Solyc01g005090.2.1
query:7917;rank:1	-0.933228	0.681514	1	X.PVIIASFMILLFVSI.X	Solyc04g015980.2.1
query:11044;rank:1	-0.933479	0.686957	1	X.KVKAKAKKKGKKVEVVSC.X	Solyc12g019020.1.1
query:9667;rank:1	-0.933479	0.686957	1	X.SGLIKTKVPGVKSIISK.X	Solyc12g011430.1.1
query:17909;rank:1	-0.933554	0.686957	1	X.KEDLIPKNLKSMDYRQLVETLVK.X	Solyc08g005440.2.1
query:11898;rank:1	-0.933554	0.686957	1	X.NLSLKATLPRPKSKTDI.X	Solyc02g086600.2.1
query:20013;rank:1	-0.933575	0.686957	1	X.SSLSPTSSHDEPSPSVSPTTAKSSN.X	Solyc07g063020.1.1
query:12876;rank:1	-0.93367	0.686957	1	X.NIIISAEEIPANVERGAKLP.X	Solyc11g066780.1.1
query:5189;rank:1	-0.933692	0.686957	1	X.EIQTAVRLVLPGE.X	Solyc05g055440.1.1
query:22223;rank:1	-0.933765	0.686957	1	X.TILSTLAMINLFCLMGLVKKLILTRELGLEYVFE.X	Solyc07g065660.2.1
query:4413;rank:1	-0.933831	0.686957	1	X.LDWPPMVRSIN.X	Solyc01g090860.2.1
query:2319;rank:1	-0.933831	0.686957	1	X.SKVPVVENGE.X	Solyc01g109260.2.1
query:20012;rank:1	-0.933921	0.686957	1	X.RIGLSSTTSMKPSNSASSSMSSHM.X	Solyc04g078050.2.1
query:4642;rank:1	-0.934051	0.689805	1	X.RKTLVPHARPL.X	Solyc07g053790.1.1
query:15189;rank:1	-0.934107	0.690476	1	X.KCSTEVSSALASNDTMELV.X	Solyc10g079790.1.1
query:16961;rank:1	-0.934147	0.693305	1	X.RSYLGIAKPDIMAPGVLILAAFPPN.X	Solyc01g087800.2.1
query:9255;rank:1	-0.934242	0.693966	1	X.TYKIKSSLLKIFQIN.X	Solyc07g006750.2.1
query:6280;rank:1	-0.934615	0.709677	1	X.ICATIAFGMGINKPN.X	Solyc01g103960.2.1
query:22466;rank:1	-0.934718	0.711538	1	X.QEKKQSSTAANVKNIRGDPTQRKAVSRRTESKNPE.X	Solyc08g081980.2.1
query:21460;rank:1	-0.934813	0.711538	1	X.LAASIVGPPSEFVPSLIQVLEMLVVHISKDP.X	Solyc03g007970.1.1
query:18049;rank:1	-0.934814	0.711538	1	X.YSTSGNSSSASSFDATPTHVHMN.X	Solyc04g072070.2.1
query:5210;rank:1	-0.935209	0.722814	1	X.QGTQTTVLAVSKN.X	Solyc03g058860.2.1
query:18368;rank:1	-0.93535	0.72766	1	X.LKDVGAVVAATAVSAMLASNAMALEVLLGG.X	Solyc04g082010.1.1
query:20856;rank:1	-0.935488	0.733051	1	X.GLKSLNLSRNELNGTVIEGIGQMRMLESLDM.X	Solyc07g008620.1.1
query:20808;rank:1	-0.935506	0.733051	1	X.KMRKFDTAWSLIEEMRGGKDRPSLVNPQT.X	Solyc07g025250.1.1
query:11039;rank:1	-0.935626	0.733615	1	X.GASTLDRKIKATVKLGNGE.X	Solyc08g079880.1.1
query:12970;rank:1	-0.935704	0.734177	1	X.TEIEKLSKEETIEREKV.X	Solyc09g064810.2.1
query:13568;rank:1	-0.935765	0.738947	1	X.NRRTKRKYVRVKKNKNN.X	Solyc02g093890.1.1
query:8190;rank:1	-0.935903	0.741344	1	X.KLEGSKQLKQIKLL.X	Solyc08g081980.2.1
query:20190;rank:1	-0.936053	0.741344	1	X.QNTLGEFLEKDMANGCSPSNDTASSSPLC.X	Solyc12g099900.1.1
query:9440;rank:1	-0.936053	0.741344	1	X.FFILAAIIYRKVSRN.X	Solyc01g094020.2.1
query:10980;rank:1	-0.936101	0.741344	1	X.LKEFDGGGLLMNILSLTN.X	Solyc07g052390.2.1
query:23384;rank:1	-0.936179	0.741344	1	X.VKLLLPSIAALPLLMAYAGHTTIIIPKPLVSYVGLEILDL.X	Solyc04g016520.2.1
query:5632;rank:1	-0.936243	0.741344	1	X.VFVRADLNVPLDD.X	Solyc07g066610.2.1
query:9956;rank:1	-0.936317	0.741344	1	X.YTLPYVLKACGRMKSL.X	Solyc04g005460.1.1
query:17775;rank:1	-0.936339	0.741344	1	X.NILTEDNKLTKSIQVILDALNELR.X	Solyc03g112950.2.1
query:20094;rank:1	-0.936455	0.741344	1	X.KIMVGRTCVVVAHRLSTIRKAGTIVVINN.X	Solyc07g018130.1.1
query:13673;rank:1	-0.936593	0.741344	1	X.IRLHAAREMLRISPPVPKK.X	Solyc04g007290.2.1
query:3210;rank:1	-0.936596	0.741344	1	X.AKPLSKVKISGGG.X	Solyc02g067480.2.1
query:18673;rank:1	-0.93672	0.741344	1	X.KLKKTTSGSSVLSSSPDTSEKL.X	Solyc07g052000.1.1
query:14754;rank:1	-0.936732	0.741344	1	X.FSSFSSSSLDTESTMS.X	Solyc02g077720.2.1
query:10388;rank:1	-0.936732	0.741344	1	X.FKFLLFMIIIISSVF.X	Solyc02g085590.2.1
query:3712;rank:1	-0.936815	0.741344	1	X.SQSSPVLVSENG.X	Solyc09g082970.2.1
query:19771;rank:1	-0.93687	0.741344	1	X.KNVHSLPTLSQNLLNETNLQSCMKLKL.X	Solyc09g008100.2.1
query:22351;rank:1	-0.937006	0.744422	1	X.TLAIFLSIPIFLAGSSFYRNKIPSGSPLTTISKV.X	Solyc05g006990.2.1
query:10192;rank:1	-0.937006	0.744422	1	X.IVGMAGLGKTALARKVYN.X	Solyc05g009760.1.1
query:17401;rank:1	-0.937008	0.746479	1	X.RKLAKETHPDLAHSTHNSSTSK.X	Solyc02g064740.2.1
query:16884;rank:1	-0.937146	0.746479	1	X.ELERLKQCLSVFFEHYPSLSL.X	Solyc11g011370.1.1
query:11241;rank:1	-0.937146	0.746479	1	X.PSRSSSSSSSSSL.X	Solyc10g006350.2.1
query:6232;rank:1	-0.937146	0.746479	1	X.PGDVRPSVKMNLVN.X	Solyc02g085680.1.1
query:8214;rank:1	-0.937284	0.746988	1	X.CRLPVITPCKHLLCL.X	Solyc11g005250.1.1
query:336;rank:1	-0.937482	0.751503	1	X.QPPTVPMG.X	Solyc02g082220.2.1
query:23093;rank:1	-0.937699	0.753479	1	X.QLEDGRNLVDYNIQKESTLHLVLRLRGGMQIFVKTLTG.X	Solyc11g005640.1.1
query:19501;rank:1	-0.937785	0.753479	1	X.ASTLMVPPSPTGVWDVASSSDMSDDD.X	Solyc12g087900.1.1
query:16094;rank:1	-0.937785	0.753479	1	X.DFISFIITVSFLPSALCRPSIT.X	Solyc06g069220.1.1
query:5772;rank:1	-0.937785	0.753479	1	X.AIMSSQAGQMSKHN.X	Solyc06g054340.1.1
query:14883;rank:1	-0.937837	0.754455	1	X.KSASFVKWAPLFKCSPVVALST.X	Solyc08g075280.2.1
query:21840;rank:1	-0.937884	0.754455	1	X.IVKNSLSTAVKLVQEDVKLVTDSYMKNKSFLS.X	Solyc08g036440.1.1
query:19974;rank:1	-0.937983	0.757339	1	X.SMTTTMMMMLMVMVMMMKMIQMVM.X	Solyc07g021560.1.1
query:6629;rank:1	-0.938113	0.757339	1	X.SQDDTSSSSSMN.X	Solyc11g066380.1.1
query:5505;rank:1	-0.938113	0.757339	1	X.SLITLARNINETN.X	Solyc12g010300.1.1
query:15367;rank:1	-0.938181	0.757339	1	X.FGASTTTFGSSSPAFGSSS.X	Solyc04g007280.2.1
query:18920;rank:1	-0.938245	0.757339	1	X.KVLRLVAVAAFTLSLRTKRDIKET.X	Solyc01g104490.2.1
query:2504;rank:1	-0.938245	0.757339	1	X.NPPLRNTASVP.X	Solyc05g052340.2.1
query:11003;rank:1	-0.938251	0.757813	1	X.IITTHIDILHKLAQLLI.X	Solyc04g082250.2.1
query:16716;rank:1	-0.938478	0.761165	1	X.KLWIKIVCQKKRGGLTKLMEAM.X	Solyc02g079810.1.1
query:12725;rank:1	-0.938478	0.761165	1	X.TMVLAILGISLATITTNIAAN.X	Solyc09g008550.2.1
query:4927;rank:1	-0.938478	0.761165	1	X.LKPSLGCSLKGVN.X	Solyc11g065340.1.1
query:23592;rank:1	-0.93853	0.761628	1	X.IVELMQKMQECGQPPNDIVQELAPDFDISTLGQLSPEMLES.X	Solyc06g060720.2.1
query:14313;rank:1	-0.938666	0.764023	1	X.LLLLLLLLLLMMLLFLLSLS.X	Solyc12g062980.1.1
query:12012;rank:1	-0.938912	0.766409	1	X.GSSSTSRMSSSNSSN.X	Solyc03g112390.2.1
query:18254;rank:1	-0.939073	0.770713	1	X.YRMSVRIPKKNRSIKVDYIRSG.X	Solyc03g044940.1.1
query:16748;rank:1	-0.93908	0.771593	1	X.WYHYITGRVLILLATINVFYG.X	Solyc06g082860.2.1
query:10933;rank:1	-0.939102	0.771593	1	X.VDLPDSGTSVSHGSSFGAVE.X	Solyc08g007040.2.1
query:18505;rank:1	-0.939271	0.778388	1	X.DITTATTTITMTTTSSAATVISE.X	Solyc11g013560.1.1
query:10347;rank:1	-0.939356	0.778388	1	X.ENVQVIGTEKLSSMEA.X	Solyc01g113450.1.1
query:12526;rank:1	-0.939483	0.778388	1	X.KGVSITLLEITGKKGDVQVN.X	Solyc09g074950.2.1
query:13893;rank:1	-0.939483	0.778388	1	X.SQIEDLKKESRRPGPPPPPN.X	Solyc08g076930.1.1
query:5668;rank:1	-0.939568	0.778388	1	X.LSFFDQISEKEH.X	Solyc07g052060.2.1
query:12623;rank:1	-0.939674	0.778388	1	X.SGRLYHQVEMMSRYYR.X	Solyc08g077800.2.1
query:1704;rank:1	-0.939766	0.778388	1	X.NSAATIIVAN.X	Solyc06g008160.2.1
query:3925;rank:1	-0.939771	0.778388	1	X.KRTAGGVLKRM.X	Solyc05g006130.2.1
query:60;rank:1	-0.939771	0.778388	1	X.FRVHHN.X	Solyc01g006540.2.1
query:3761;rank:1	-0.939964	0.778388	1	X.KICTIALTAGSQ.X	Solyc01g096110.2.1
query:8442;rank:1	-0.940047	0.778388	1	X.TGMSFRVPTVDVSVVD.X	Solyc01g098950.1.1
query:2610;rank:1	-0.940047	0.778388	1	X.IKSLPVEGFGG.X	Solyc09g005160.1.1
query:16414;rank:1	-0.940185	0.778388	1	X.QIEGLVILKIIKHCKEFSPALV.X	Solyc12g098680.1.1
query:10131;rank:1	-0.940185	0.778388	1	X.KPNLQAGGGTAVRAFSLW.X	Solyc00g036750.1.1
query:5713;rank:1	-0.940185	0.778388	1	X.TLYQAILTEMDAD.X	Solyc10g080340.1.1
query:14785;rank:1	-0.940262	0.778388	1	X.RNGTSAISGPNQKLDRMLRF.X	Solyc04g016560.1.1
query:21805;rank:1	-0.940361	0.778388	1	X.KDTSSSSTQMMNNMGNVDFPKHCVIENGMM.X	Solyc11g072770.1.1
query:19360;rank:1	-0.9406	0.778388	1	X.GMLRPLLPTKFPFIPTTDVGGEVVEVGSN.X	Solyc09g059030.2.1
query:16294;rank:1	-0.940627	0.778388	1	X.VLAGVLNAVRVPITSIAAVILLHD.X	Solyc07g005660.2.1
query:6328;rank:1	-0.940627	0.778388	1	X.FLVLMSGLLLNPKL.X	Solyc03g112260.2.1
query:6171;rank:1	-0.940738	0.778388	1	X.LTMAVGVAFVSKES.X	Solyc11g011220.1.1
query:2037;rank:1	-0.940757	0.778388	1	X.FSLANVTKVN.X	Solyc06g076480.2.1
query:1788;rank:1	-0.940757	0.778388	1	X.ALVIVPSVNA.X	Solyc05g054410.2.1
query:1225;rank:1	-0.940757	0.778388	1	X.AKTTAGPT.X	Solyc03g005440.2.1
query:19924;rank:1	-0.940818	0.778388	1	X.LVSLDADPLLKGHTPVHRFTSLQAAAVVF.X	Solyc05g008590.2.1
query:14255;rank:1	-0.940876	0.779197	1	X.LHHDTMTASTSPTRHP.X	Solyc05g053130.2.1
query:11663;rank:1	-0.940876	0.779197	1	X.PSFQLLTILFLLLHVLA.X	Solyc02g072400.1.1
query:12060;rank:1	-0.940913	0.779599	1	X.LIVSGRFIGTCPGSVKVSGT.X	Solyc03g122270.2.1
query:11493;rank:1	-0.941054	0.780797	1	X.FDTLIEPPSHISHLLE.X	Solyc06g065410.2.1
query:17042;rank:1	-0.941104	0.780797	1	X.TVFVAKFFGRAGLMSFISAVPENQ.X	Solyc02g092550.2.1
query:17551;rank:1	-0.941152	0.780797	1	X.TDVDDKVASWWDYGYQTTAMAN.X	Solyc12g008360.1.1
query:5997;rank:1	-0.94129	0.783002	1	X.LADPGHATIFAAFSP.X	Solyc10g006230.2.1
query:1586;rank:1	-0.941428	0.785199	1	X.LAPAGNEQKN.X	Solyc09g091280.2.1
query:16417;rank:1	-0.941485	0.785586	1	X.KLSPYGIEALRHIRDFLGVKFV.X	Solyc02g069340.2.1
query:22157;rank:1	-0.941567	0.78777	1	X.VVKSPNRSTTCPNGSIHQDRGCNNISASGVTNPFED.X	Solyc06g076590.2.1
query:4644;rank:1	-0.941771	0.789286	1	X.RVARTVIIGGIVN.X	Solyc01g109990.2.1
query:7943;rank:1	-0.941843	0.789286	1	X.DIKLGQVRVLLDKAGG.X	Solyc08g067420.2.1
query:13062;rank:1	-0.941866	0.789286	1	X.SMNAAFQGTRLSFDPGYN.X	Solyc00g045570.1.1
query:8109;rank:1	-0.941946	0.789286	1	X.QSGSHSTPFYSAI.X	Solyc03g121940.2.1
query:10921;rank:1	-0.941981	0.789661	1	X.NKIGARGKKGFLSTELLN.X	Solyc11g072800.1.1
query:5364;rank:1	-0.942144	0.792185	1	X.SAVTVAMVMGLIVA.X	Solyc03g093650.2.1
query:9144;rank:1	-0.942152	0.792185	1	X.GVVPVLYTRVACKRSG.X	Solyc07g063210.2.1
query:8647;rank:1	-0.942441	0.803191	1	X.ETDTGVPSGGNFRS.X	Solyc07g017730.2.1
query:10005;rank:1	-0.942639	0.805996	1	X.GGFIPYVGGVEHAHVLLP.X	Solyc04g007100.2.1
query:22822;rank:1	-0.942672	0.805996	1	X.PLKAKVTHPHSVRAICGLNLQENCVHGSDSPQSASREI.X	Solyc12g049370.1.1
query:14965;rank:1	-0.942672	0.805996	1	X.ISMSEEDLLNAAGETYSVTLSE.X	Solyc04g082010.1.1
query:21949;rank:1	-0.943086	0.814361	1	X.YFPDYTEDELRQILMKNQKNPKLYSSFLEV.X	Solyc01g094760.2.1
query:21703;rank:1	-0.943086	0.814361	1	X.EDGTTLAVRRIGESGVERFKDFENQVKLIAKL.X	Solyc02g092940.2.1
query:759;rank:1	-0.943086	0.814361	1	X.QIPVEFGN.X	Solyc03g007050.2.1
query:18694;rank:1	-0.943135	0.814361	1	X.PGKERMSTASTSSDPLAGTSATN.X	Solyc04g078680.2.1
query:5859;rank:1	-0.943224	0.81993	1	X.ISKSGFSQYFV.X	Solyc08g081990.2.1
query:4425;rank:1	-0.943234	0.82199	1	X.EARSIKVGPPPPP.X	Solyc02g079950.2.1
query:22628;rank:1	-0.943391	0.822917	1	X.ILKSMNIESMIVTGDNWGTANAIAKQVGIERKHVV.X	Solyc08g080890.2.1
query:13662;rank:1	-0.943432	0.822917	1	X.LFIIRPLVYVLLMRKYGT.X	Solyc06g074460.2.1
query:4144;rank:1	-0.943486	0.822917	1	X.SISYKSISLSA.X	Solyc01g008920.2.1
query:12143;rank:1	-0.9435	0.824957	1	X.RTDGMFLLCGGRDASGTPLV.X	Solyc09g074320.2.1
query:18526;rank:1	-0.943581	0.825561	1	X.KKSINGVLNKINKANIKYIIPELFG.X	Solyc03g116050.1.1
query:7552;rank:1	-0.943729	0.825561	1	X.KSTFSSRGLRSTFT.X	Solyc04g074220.2.1
query:1709;rank:1	-0.943772	0.825862	1	X.MKVIASYLL.X	Solyc11g067100.1.1
query:14387;rank:1	-0.943963	0.83821	1	X.KMISILPKFFDMIYFLFH.X	Solyc06g008510.2.1
query:3811;rank:1	-0.944125	0.840206	1	X.PLVITQPSAGKP.X	Solyc02g092560.2.1
query:12715;rank:1	-0.944153	0.840753	1	X.QKMAPASSSSQNASGIVSCS.X	Solyc08g067150.2.1
query:3426;rank:1	-0.944153	0.840753	1	X.SSTMNTSGG.X	Solyc02g094410.2.1
query:17492;rank:1	-0.944224	0.843434	1	X.CIFKSKFLKFMLHMLKLEVTFV.X	Solyc01g049970.1.1
query:14305;rank:1	-0.944323	0.843434	1	X.KTDLSETHMRLSIPVNQVVN.X	Solyc08g006130.1.1
query:23113;rank:1	-0.944467	0.843434	1	X.AYFQVTNPIKLPKTKSCSYLILKHDFAYTYGKTPILTN.X	Solyc07g062460.2.1
query:16505;rank:1	-0.944467	0.843434	1	X.NSAVWKAIRRVKKPSTNPWLG.X	Solyc08g067260.2.1
query:14984;rank:1	-0.944467	0.843434	1	X.LAVSPVLVCTAVLLGTLLSFGQP.X	Solyc10g081200.1.1
query:4088;rank:1	-0.944606	0.843434	1	X.KFGTQVKVLEY.X	Solyc12g056820.1.1
query:23691;rank:1	-0.944606	0.843434	1	X.KLVVSSALSRHESRGLHYTIDFPHVEESKRLPTVIFPSQL.X	Solyc12g014530.1.1
query:21142;rank:1	-0.944606	0.843434	1	X.AYLRNGRAGSSTSPLIVAKKDRKGKRMQLVN.X	Solyc10g050190.1.1
query:18917;rank:1	-0.944725	0.843434	1	X.LCAKPLVISIEDLSDAMGIPSFLIPFV.X	Solyc02g077270.2.1
query:4107;rank:1	-0.944744	0.843434	1	X.KAVKSGSTFKKM.X	Solyc10g084610.1.1
query:5738;rank:1	-0.945017	0.847059	1	X.KPCYFNTGVLVMD.X	Solyc09g074080.1.1
query:17185;rank:1	-0.94502	0.847826	1	X.KATGATVVSTFADMEGEETFEP.X	Solyc01g090750.2.1
query:5921;rank:1	-0.945106	0.847826	1	X.KRGVVMTCSKCVT.X	Solyc06g069200.1.1
query:3318;rank:1	-0.945116	0.847826	1	X.SVVFAHSNDL.X	Solyc07g045400.1.1
query:9428;rank:1	-0.945202	0.84808	1	X.FLRSIIIIHLYLVPN.X	Solyc01g073950.2.1
query:16176;rank:1	-0.945413	0.854098	1	X.FLRLGGLWLVTFAVLGVPIAAASF.X	Solyc02g092700.2.1
query:17832;rank:1	-0.945512	0.854098	1	X.GVVSGAALVCIIVFSLYKLYLTSRN.X	Solyc02g081500.2.1
query:15662;rank:1	-0.945512	0.854098	1	X.KATTTTLRHTISESERGS.X	Solyc12g005920.1.1
query:21009;rank:1	-0.945573	0.854098	1	X.AAENVYIKKMEKEKLEKLARQGPKPGEQAAGG.X	Solyc11g068510.1.1
query:16142;rank:1	-0.945573	0.854098	1	X.KASKVRQELSQVISLVKGSETF.X	Solyc05g016290.1.1
query:12868;rank:1	-0.945611	0.854098	1	X.TARLSSRRLPFTVRMS.X	Solyc10g077040.1.1
query:8481;rank:1	-0.94571	0.854098	1	X.KDDVVPGTSPNTLGS.X	Solyc08g005860.2.1
query:17737;rank:1	-0.945711	0.854098	1	X.YTVEGMPIWCTFLVHKSKGVLIPL.X	Solyc11g011560.1.1
query:10948;rank:1	-0.945773	0.854098	1	X.HTPIVSQGESLESQVSGN.X	Solyc06g065540.2.1
query:5009;rank:1	-0.945773	0.854098	1	X.ATTTSHATNT.X	Solyc07g056570.1.1
query:2314;rank:1	-0.945773	0.854098	1	X.LMASCLGAGSLV.X	Solyc02g086500.2.1
query:19642;rank:1	-0.945869	0.85443	1	X.ILTTTTTSSTLLPLLPPLSRAQSLLIQ.X	Solyc04g014240.1.1
query:15847;rank:1	-0.945987	0.85443	1	X.SVVSSLSESGAVSELVTVTEV.X	Solyc06g071490.1.1
query:15306;rank:1	-0.945987	0.85443	1	X.HGCDKGPILLLDLSSKSILLKS.X	Solyc11g017270.1.1
query:13024;rank:1	-0.946008	0.85443	1	X.DFDAIRLPSFQMMFKATL.X	Solyc09g005670.1.1
query:15066;rank:1	-0.946125	0.85443	1	X.KREGDDLLLGVKVRLVQTLTG.X	Solyc11g040400.1.1
query:17013;rank:1	-0.946155	0.85443	1	X.DSTMSSESDHDQDKGVAPEQLN.X	Solyc06g073960.2.1
query:18051;rank:1	-0.946263	0.85443	1	X.KMNLMIIGDGMYATIITGSLNVVDG.X	Solyc07g064180.2.1
query:18989;rank:1	-0.946401	0.85443	1	X.VGSMPMEFAVRLTVWTPNESVYCN.X	Solyc03g116480.1.1
query:16887;rank:1	-0.946401	0.85443	1	X.INLVIWDKHSTLVGTVGLLICML.X	Solyc03g110970.2.1
query:5302;rank:1	-0.946401	0.85443	1	X.NYLNLSRNHLN.X	Solyc01g103530.2.1
query:14787;rank:1	-0.946401	0.85443	1	X.QFVPANAHYIQHTATGPVAAPS.X	Solyc03g118870.2.1
query:12368;rank:1	-0.946404	0.85443	1	X.TLAFVLPVVEIIRRSSSN.X	Solyc02g078880.2.1
query:19158;rank:1	-0.94644	0.85443	1	X.SNMCTDALSAEKYYYFIRLMGRKAS.X	Solyc12g095760.1.1
query:5440;rank:1	-0.94644	0.85443	1	X.ATVGGKEYYYLSV.X	Solyc07g044860.2.1
query:23209;rank:1	-0.94654	0.85443	1	X.AVTDGLLYTWRLCSYASPKYLFWILAYVLGAGLTIRNF.X	Solyc04g055120.2.1
query:14869;rank:1	-0.94654	0.85443	1	X.YTGEQKTLDMVYRQAPKEL.X	Solyc06g069660.1.1
query:138;rank:1	-0.94654	0.85443	1	X.PPKMQTD.X	Solyc05g051750.2.1
query:14036;rank:1	-0.946602	0.85443	1	X.ASSCTDSMMQTIMSGYN.X	Solyc07g052940.2.1
query:22021;rank:1	-0.946631	0.85443	1	X.SGGKYSDEPSPADEWFDRGKFVKAYPVSGTGEKA.X	Solyc09g047900.1.1
query:10767;rank:1	-0.946701	0.85443	1	X.SCIHNIISTTTTDLISTN.X	Solyc04g077310.2.1
query:16057;rank:1	-0.946726	0.85443	1	X.NKLNTIMQEAAGFKLRYGLKE.X	Solyc01g047590.1.1
query:6749;rank:1	-0.9468	0.85443	1	X.FIQSGRKLTNSTKN.X	Solyc03g044690.1.1
query:21171;rank:1	-0.946822	0.85624	1	X.MLTLKLMFTLKLTLTLMLTLVLTLTLMSIL.X	Solyc03g065080.1.1
query:7380;rank:1	-0.946899	0.858044	1	X.TESAISTLVQRN.X	Solyc09g092410.2.1
query:13334;rank:1	-0.946954	0.858915	1	X.RNIPEDDPRNPAVIADNVGD.X	Solyc03g117480.2.1
query:1840;rank:1	-0.947092	0.858915	1	X.THGIYPKPR.X	Solyc07g007870.2.1
query:19968;rank:1	-0.947196	0.858915	1	X.VKQHDLETLKSLTVEAPLGISTEVSALR.X	Solyc01g005380.2.1
query:16240;rank:1	-0.94723	0.858915	1	X.QKLSIVTDKPQTTRHRVLGI.X	Solyc02g077280.2.1
query:16083;rank:1	-0.947295	0.858915	1	X.VVKTNSIVSSISVQAAGKLFSYK.X	Solyc07g006030.2.1
query:17798;rank:1	-0.947298	0.858915	1	X.RKVAIGLNKLGVQQKDTIMILLPN.X	Solyc12g042460.1.1
query:22393;rank:1	-0.947368	0.858915	1	X.MGSLTMEDNTAATDRTDLSSFARTSMITDS.X	Solyc04g012170.2.1
query:19798;rank:1	-0.947368	0.858915	1	X.SEAAGALAYLHSAASTPVIHRDVKSTNIL.X	Solyc11g072140.1.1
query:9426;rank:1	-0.947368	0.858915	1	X.AKQLAESGAHLVMAVRN.X	Solyc12g042640.1.1
query:13611;rank:1	-0.947394	0.858915	1	X.PEKISVAIFVTALMPGLILD.X	Solyc01g108750.2.1
query:8195;rank:1	-0.947394	0.858915	1	X.FVKSMAQSSDSSN.X	Solyc09g009820.2.1
query:18016;rank:1	-0.947489	0.859351	1	X.VGVSIAVFNQASKIAIFPLVSVTTSFV.X	Solyc01g008420.2.1
query:2317;rank:1	-0.947489	0.859351	1	X.LPGDGQLIHTS.X	Solyc06g072340.2.1
query:16951;rank:1	-0.947584	0.86	1	X.GLPLQLWSKEVMKMIGRVCGGLL.X	Solyc10g012000.1.1
query:6998;rank:1	-0.947645	0.86	1	X.MKRFVLPTSYLKN.X	Solyc06g065220.1.1
query:5220;rank:1	-0.947679	0.86	1	X.LRMEDGTGLLLPI.X	Solyc12g089220.1.1
query:10683;rank:1	-0.947783	0.869432	1	X.TVKSAVSLAAKKVLITGQN.X	Solyc05g056170.2.1
query:21289;rank:1	-0.94787	0.869832	1	X.TYFPSVNMKKTKEKSNTDSIACMSMFG.X	Solyc06g063240.2.1
query:742;rank:1	-0.94789	0.869832	1	X.LVASHSSSN.X	Solyc08g076020.2.1
query:7939;rank:1	-0.947965	0.87156	1	X.PNDQVISRIYYVTGG.X	Solyc07g014580.2.1
query:852;rank:1	-0.947989	0.871756	1	X.AAMETCCP.X	Solyc07g005570.2.1
query:16395;rank:1	-0.948156	0.875	1	X.DNEFSMKSSSASSSTVAAGKRSM.X	Solyc09g011190.1.1
query:5793;rank:1	-0.948197	0.877273	1	X.GRISSMDFHKTSN.X	Solyc02g083940.2.1
query:15502;rank:1	-0.948251	0.877273	1	X.QSKSTIGVEFATRTIHVDDKIV.X	Solyc10g008840.2.1
query:14948;rank:1	-0.948286	0.877273	1	X.AGQEGNSVLLVWTMILLCLH.X	Solyc07g055480.1.1
query:9708;rank:1	-0.948286	0.877273	1	X.KSRPVIIDPSSLLLNW.X	Solyc08g062080.1.1
query:15647;rank:1	-0.948474	0.878971	1	X.KLVTFQSTQAWIKSLNYSV.X	Solyc04g077640.2.1
query:5905;rank:1	-0.948583	0.880292	1	X.AASSGPSSPIFS.X	Solyc01g104540.2.1
query:17476;rank:1	-0.948632	0.880292	1	X.TVTEVHPSLDDSTGVQSKSISN.X	Solyc07g064970.2.1
query:17323;rank:1	-0.948632	0.880292	1	X.EVQKIAKVMIKTGKLLSASPVSGVD.X	Solyc04g050470.2.1
query:13795;rank:1	-0.948682	0.880292	1	X.VTSPKSGSVWLKSLLFALVN.X	Solyc05g011900.1.1
query:19271;rank:1	-0.948728	0.880292	1	X.SPSANMSATALLQKAAQIGATTTTDPS.X	Solyc07g053570.2.1
query:4238;rank:1	-0.948728	0.880292	1	X.LLKNGKVTNQPL.X	Solyc06g073740.2.1
query:664;rank:1	-0.948728	0.880292	1	X.TTTAAAN.X	Solyc02g082250.2.1
query:21739;rank:1	-0.94875	0.880292	1	X.LQLPYQIIWSSLSEATSFPYSDHQPVVGILPQP.X	Solyc09g005600.2.1
query:2933;rank:1	-0.94875	0.880292	1	X.QPTNNAGQRFS.X	Solyc04g016370.2.1
query:2031;rank:1	-0.948888	0.880292	1	X.GIIMVVLMSI.X	Solyc06g068680.2.1
query:19306;rank:1	-0.948918	0.880292	1	X.KSATKLSSSSHVYMSKVLVVASLLVVF.X	Solyc03g080090.2.1
query:110;rank:1	-0.94898	0.880292	1	X.KFKSGFV.X	Solyc10g079000.1.1
query:573;rank:1	-0.949109	0.880292	1	X.MKKHSKN.X	Solyc08g082710.2.1
query:11009;rank:1	-0.949164	0.880292	1	X.VLENLQTLCTITISTIN.X	Solyc11g069020.1.1
query:3958;rank:1	-0.949164	0.880292	1	X.AIEPLIHVLHTG.X	Solyc12g100000.1.1
query:18364;rank:1	-0.949204	0.880292	1	X.TTPPIEKIAIAGGLISTPVIGWSLYT.X	Solyc03g034070.1.1
query:19375;rank:1	-0.9493	0.880292	1	X.AAKMSRKGLMEQDLSKLDVTQLHPLS.X	Solyc01g066690.2.1
query:545;rank:1	-0.9493	0.880292	1	X.SGPLAGLIGS.X	Solyc10g079290.1.1
query:13009;rank:1	-0.949302	0.880292	1	X.KQSEHVVPTIREAPIPPFV.X	Solyc02g055460.1.1
query:21638;rank:1	-0.949376	0.880292	1	X.LVYEYMANGTLRSHLFGSDLPSLSWKQRLE.X	Solyc02g069970.2.1
query:118;rank:1	-0.949395	0.880292	1	X.QPMPNID.X	Solyc12g038490.1.1
query:20647;rank:1	-0.949441	0.880292	1	X.LMNNNRITRINPNIGEFLPKLHTLIITSN.X	Solyc03g117940.2.1
query:1284;rank:1	-0.94949	0.880292	1	X.KKLVIALNP.X	Solyc02g033100.1.1
query:13158;rank:1	-0.949574	0.880292	1	X.DLLLTLLRAALDKIETMGAS.X	Solyc07g045370.2.1
query:1268;rank:1	-0.949681	0.886297	1	X.KSSNCVKIL.X	Solyc00g009540.1.1
query:9872;rank:1	-0.949855	0.889374	1	X.LPSEQVMSEVHLGCPPN.X	Solyc03g120130.2.1
query:5675;rank:1	-0.949871	0.889535	1	X.ASRAQNYANSRAGD.X	Solyc09g007010.1.1
query:19575;rank:1	-0.949967	0.892754	1	X.KPVKLTTAILSHLMSKTRKGTGIQGLR.X	Solyc03g062720.2.1
query:3940;rank:1	-0.94997	0.892754	1	X.GVGVVGGGVVVGVVGS.X	Solyc07g021320.2.1
query:16595;rank:1	-0.950062	0.894356	1	X.MAMLSMPKKLCDTLLEIADKYN.X	Solyc02g065280.2.1
query:15335;rank:1	-0.950131	0.894509	1	X.LGRAGSKRWLGKRPVVRGVVM.X	Solyc01g007630.2.1
query:3005;rank:1	-0.950253	0.894813	1	X.KRPNLAEGPKN.X	Solyc11g013240.1.1
query:151;rank:1	-0.950253	0.894813	1	X.GAPMDDPD.X	Solyc06g066810.2.1
query:14908;rank:1	-0.950269	0.898135	1	X.TAKCVPNSIIMHIGDTIEILSN.X	Solyc08g080040.2.1
query:12626;rank:1	-0.950269	0.898135	1	X.SPVSNHLFSAEKAMPQATL.X	Solyc08g065800.1.1
query:4059;rank:1	-0.950367	0.898135	1	X.GHEDPIALASQTA.X	Solyc08g077770.2.1
query:14535;rank:1	-0.950546	0.899148	1	X.VPKLSEWKLNPIRAISVVYN.X	Solyc01g100910.2.1
query:10459;rank:1	-0.950565	0.899148	1	X.AGEKTGGYTVANLIWDM.X	Solyc01g112020.2.1
query:2630;rank:1	-0.950634	0.899148	1	X.KNNGVKITVVD.X	Solyc11g033320.1.1
query:16719;rank:1	-0.950684	0.899148	1	X.DIWKPLQLRQLHSDLPVKLPPP.X	Solyc04g015250.1.1
query:10291;rank:1	-0.950684	0.899148	1	X.WERQRQSEMKIVPAN.X	Solyc02g083900.2.1
query:4885;rank:1	-0.950684	0.899148	1	X.PKAAKSIVSIAIL.X	Solyc01g066610.2.1
query:1818;rank:1	-0.950684	0.899148	1	X.SGSRLAQRL.X	Solyc07g063040.2.1
query:23419;rank:1	-0.950824	0.903439	1	X.STSSGAAGAAASSSSSSGSSSRSSSSNRSRSSGSGSGSGSE.X	Solyc08g077750.2.1
query:9633;rank:1	-0.95096	0.903439	1	X.SQENETALVMRQPGN.X	Solyc10g005030.2.1
query:8463;rank:1	-0.95096	0.903439	1	X.RRRSMDSVTSNSSVK.X	Solyc02g069290.2.1
query:20105;rank:1	-0.950961	0.903439	1	X.PPLPSVMPAPSSFPPPSSILNLAPSIVQSK.X	Solyc09g064840.2.1
query:19224;rank:1	-0.950961	0.903439	1	X.RGQLSLEKLTPEKSLNSFSTSLGSMVVN.X	Solyc11g005250.1.1
query:12321;rank:1	-0.95106	0.903439	1	X.PEVPLASSSDCSLNECAD.X	Solyc11g066170.1.1
query:2254;rank:1	-0.95106	0.903439	1	X.PPLAVFQLDK.X	Solyc07g053540.1.1
query:9850;rank:1	-0.951098	0.903439	1	X.DLMRLLHQPVYRSQ.X	Solyc01g066820.2.1
query:5993;rank:1	-0.95111	0.903439	1	X.GLRNLQILWLSSN.X	Solyc01g009700.1.1
query:19170;rank:1	-0.951159	0.903439	1	X.HAFTKIMQTINAGTTAIFFVDGPGGT.X	Solyc03g083230.1.1
query:2777;rank:1	-0.951159	0.903439	1	X.NGTGKFDLKLL.X	Solyc09g075230.1.1
query:16255;rank:1	-0.951236	0.903439	1	X.RNLPPLPAKKNSAVEKIQTCQD.X	Solyc10g086430.1.1
query:19841;rank:1	-0.951301	0.903439	1	X.KIFPKFVAFLKSKDSGDGTEQALLDEL.X	Solyc11g011250.1.1
query:18162;rank:1	-0.951301	0.903439	1	X.LADTAGLLVVDSTYQKLSSPNPRTYI.X	Solyc04g080770.2.1
query:5594;rank:1	-0.951374	0.903439	1	X.NNDIKAVIIAIVVS.X	Solyc05g006620.2.1
query:12398;rank:1	-0.951491	0.903439	1	X.EKKFKVACLAIGGLKVRSG.X	Solyc10g006330.2.1
query:8520;rank:1	-0.951587	0.903439	1	X.MGSLTKMLEYLHFGS.X	Solyc06g075970.2.1
query:14689;rank:1	-0.951651	0.903439	1	X.GVHWWNGRFFVLLVTTLGVF.X	Solyc02g089400.2.1
query:9607;rank:1	-0.951654	0.903439	1	X.KSSILVGSSMPNLGSKLN.X	Solyc05g020020.2.1
query:3157;rank:1	-0.951682	0.903439	1	X.QKNSEGSVLVP.X	Solyc03g115940.2.1
query:18597;rank:1	-0.951754	0.903439	1	X.LWKRKKKAFRPSGGNVMPTPSGSTP.X	Solyc05g010140.2.1
query:8885;rank:1	-0.951777	0.903439	1	X.RGITIKRTKSKAHVS.X	Solyc07g056400.1.1
query:4593;rank:1	-0.951777	0.903439	1	X.LLETGSQKAKE.X	Solyc11g017460.1.1
query:10736;rank:1	-0.951853	0.903439	1	X.PLVIQTLLPMLQNDKK.X	Solyc02g086500.2.1
query:6986;rank:1	-0.951927	0.903439	1	X.FFGNLLDRKSRML.X	Solyc07g062740.2.1
query:13326;rank:1	-0.951968	0.903439	1	X.QKESQLNLNCRDNSSIS.X	Solyc01g100540.2.1
query:6505;rank:1	-0.951968	0.903439	1	X.NATPIPATVQVTNPA.X	Solyc04g076270.1.1
query:1381;rank:1	-0.951968	0.903439	1	X.HVLKTTGHN.X	Solyc07g007690.2.1
query:2560;rank:1	-0.952065	0.903439	1	X.KSASGKMAKQAA.X	Solyc07g040980.2.1
query:2306;rank:1	-0.952065	0.903439	1	X.KSITELFGKN.X	Solyc02g084740.2.1
query:7378;rank:1	-0.952159	0.903439	1	X.NTTSVTSLNTSN.X	Solyc10g080650.1.1
query:2986;rank:1	-0.952203	0.903439	1	X.SVTFQNAMVF.X	Solyc03g120100.2.1
query:11207;rank:1	-0.952249	0.903439	1	X.SVGLRHTRSKNLKNLAV.X	Solyc12g056050.1.1
query:5629;rank:1	-0.952249	0.903439	1	X.IPSFLIPFVMVPL.X	Solyc02g077270.2.1
query:5426;rank:1	-0.952249	0.903439	1	X.REIIPKKNSAVI.X	Solyc04g054900.2.1
query:10633;rank:1	-0.952341	0.903439	1	X.TNTLSSKLENTNTT.X	Solyc08g080290.2.1
query:20467;rank:1	-0.952349	0.903439	1	X.GSKTEVSPETLKRIKRVKRVTKMTEKVAV.X	Solyc02g062100.2.1
query:15127;rank:1	-0.952349	0.903439	1	X.QSFSSARRNLEKTPNRIVVN.X	Solyc07g006850.1.1
query:3452;rank:1	-0.952349	0.903439	1	X.FDLDKMVLMD.X	Solyc06g074240.1.1
query:14278;rank:1	-0.952444	0.903439	1	X.TNNGKDLVRFTQRNILRVF.X	Solyc03g096070.2.1
query:8775;rank:1	-0.952444	0.903439	1	X.RNHGVSRNSVGAISES.X	Solyc06g073550.2.1
query:19757;rank:1	-0.952447	0.903439	1	X.VLAKMSAPPKSDVPIITPQELAEADGFVFG.X	Solyc10g006650.2.1
query:19568;rank:1	-0.952447	0.903439	1	X.AAMPLSIPSLDSPSQGEQKTSMPLGA.X	Solyc08g067040.2.1
query:9659;rank:1	-0.952447	0.903439	1	X.DKIHNFSALILNSFDT.X	Solyc04g074340.2.1
query:14571;rank:1	-0.95248	0.903439	1	X.ILTSMSKVFSDLERSVCRMV.X	Solyc07g022830.2.1
query:1986;rank:1	-0.95248	0.903439	1	X.SKMVGIGLSN.X	Solyc08g005080.1.1
query:15503;rank:1	-0.95254	0.903439	1	X.EHVGKNVHSLPTLSQNLLNETN.X	Solyc09g008100.2.1
query:5024;rank:1	-0.95254	0.903439	1	X.KLVLSPVSLPWS.X	Solyc02g005210.2.1
query:18651;rank:1	-0.952546	0.903439	1	X.RITSTLTMGLPKLDIQSSTTNAA.X	Solyc05g054910.2.1
query:20602;rank:1	-0.952618	0.903439	1	X.SKEEPGTSYSNLMNNSNCDEGIDESPRN.X	Solyc06g083660.2.1
query:17902;rank:1	-0.952618	0.903439	1	X.RFTINGAGIFLSVLISNVAGAGDIVAAK.X	Solyc03g031840.2.1
query:446;rank:1	-0.952645	0.903439	1	X.IPAGVDASK.X	Solyc04g082010.1.1
query:4755;rank:1	-0.95273	0.903567	1	X.NLRRVTYLVMD.X	Solyc12g098700.1.1
query:17128;rank:1	-0.952756	0.908854	1	X.AIASVGPSFSLQQAHQLITGKLGSR.X	Solyc10g080020.1.1
query:16550;rank:1	-0.952756	0.908854	1	X.AVLDSSSPSGRTKFGVIVVPVG.X	Solyc11g007820.1.1
query:16930;rank:1	-0.952843	0.908854	1	X.KNYRTQVARACWGLRAKRRWC.X	Solyc03g006570.2.1
query:10497;rank:1	-0.952843	0.908854	1	X.SEGFVWIVTDAMANQLN.X	Solyc08g006500.2.1
query:6960;rank:1	-0.952843	0.908854	1	X.IPNPGVKVPSGGTIPV.X	Solyc07g054310.1.1
query:11325;rank:1	-0.952894	0.908854	1	X.KKDGEISSASKAPEVIPDN.X	Solyc03g007760.2.1
query:6191;rank:1	-0.952921	0.908854	1	X.YTLVLVVLSGMLVI.X	Solyc06g053370.1.1
query:11237;rank:1	-0.952942	0.908854	1	X.KHKPKPTKLRSSITPGTV.X	Solyc11g012110.1.1
query:9577;rank:1	-0.952942	0.908854	1	X.PISYSLHRYKSANCL.X	Solyc02g086680.2.1
query:11350;rank:1	-0.953032	0.908854	1	X.QLSGSIPEEIGYLSSLTN.X	Solyc06g008300.2.1
query:8318;rank:1	-0.953032	0.908854	1	X.PAAIVALGLCSAALGTDGGG.X	Solyc01g106360.2.1
query:11023;rank:1	-0.953041	0.908973	1	X.VVAWNSLIVSYMQNGFN.X	Solyc08g013850.1.1
query:19404;rank:1	-0.953112	0.909091	1	X.LSEAEKQLRMSNDRLTWLTAALLQL.X	Solyc02g072090.1.1
query:2890;rank:1	-0.95314	0.910506	1	X.LSRILISSS.X	Solyc08g014100.1.1
query:10215;rank:1	-0.953302	0.915803	1	X.SLVYRMIPPTGREVMV.X	Solyc01g066190.1.1
query:10867;rank:1	-0.953308	0.921087	1	X.VARALQKKVYVTASKLS.X	Solyc08g067250.2.1
query:18297;rank:1	-0.953339	0.922481	1	X.LPNGTLDKWLYSHNLFLNLLQRL.X	Solyc06g006070.1.1
query:16279;rank:1	-0.953493	0.92278	1	X.ILMRLKNVKNLDPRHITLVEN.X	Solyc04g049760.2.1
query:15132;rank:1	-0.953493	0.92278	1	X.NLPIHINMTFPSLPCDVLSVDA.X	Solyc12g006310.1.1
query:15239;rank:1	-0.953537	0.92278	1	X.SRLTIAVSLTLFLTLFICAFV.X	Solyc03g112990.1.1
query:10297;rank:1	-0.953585	0.922879	1	X.LPVSRQSSYGQGVLNGIN.X	Solyc11g008440.1.1
query:6386;rank:1	-0.953683	0.925926	1	X.LSIAVGLPNIGPHFE.X	Solyc03g121540.2.1
query:18066;rank:1	-0.953723	0.925926	1	X.ETPSVSMPEIPSIPKRELPTTP.X	Solyc01g065910.1.1
query:11676;rank:1	-0.953723	0.925926	1	X.IFDLSNSTNGESCLSI.X	Solyc06g071200.2.1
query:8781;rank:1	-0.953723	0.925926	1	X.PLPPGPRSAALRGPLPPG.X	Solyc07g054980.1.1
query:15794;rank:1	-0.953735	0.925926	1	X.KSCKGFSIKGKQSLISIEDPQT.X	Solyc10g006990.2.1
query:12877;rank:1	-0.953861	0.929847	1	X.SSSLSMNIEKRFIILRGS.X	Solyc04g014450.1.1
query:8071;rank:1	-0.953933	0.929936	1	X.LLLIVTLPTNWEKR.X	Solyc07g007480.1.1
query:2623;rank:1	-0.953999	0.930607	1	X.SVNKAGKRVF.X	Solyc05g009800.2.1
query:1328;rank:1	-0.953999	0.930607	1	X.GKSATGNSILG.X	Solyc06g064920.1.1
query:9247;rank:1	-0.954131	0.930607	1	X.KATYSKVKNTFHPQM.X	Solyc10g045470.1.1
query:19888;rank:1	-0.954137	0.930607	1	X.KPIPMVSRVTVKKSKNILFVISKPDVF.X	Solyc10g078150.1.1
query:21774;rank:1	-0.954255	0.930607	1	X.ATSNGASNHPMTTPSSESRRIKTPIHPTASGSITA.X	Solyc02g093720.2.1
query:12926;rank:1	-0.954255	0.930607	1	X.KGISWDASSHNPAVKSVN.X	Solyc08g081890.2.1
query:16470;rank:1	-0.954275	0.930607	1	X.KPEKLKATRNVLSGYGNMGCATIL.X	Solyc12g098090.1.1
query:9405;rank:1	-0.954275	0.930607	1	X.NDWIVVDSARRHMN.X	Solyc12g006700.1.1
query:5117;rank:1	-0.954329	0.930607	1	X.THIPFNIFDNVT.X	Solyc11g071480.1.1
query:18331;rank:1	-0.954351	0.930607	1	X.KQKQLSALLEVLPEEDWDAHYLLN.X	Solyc05g044610.1.1
query:8717;rank:1	-0.954428	0.930607	1	X.GKMKEAMKISFMILS.X	Solyc11g012300.1.1
query:16912;rank:1	-0.954552	0.930607	1	X.VGGGERQCDVWYQLFPHKFLKI.X	Solyc02g080650.2.1
query:10088;rank:1	-0.954552	0.930607	1	X.KKIYGSQKLLDHQVNT.X	Solyc12g005010.1.1
query:7638;rank:1	-0.954552	0.930607	1	X.IDVKIIGWDAMIRI.X	Solyc08g076930.1.1
query:5194;rank:1	-0.954552	0.930607	1	X.DGILVLVDSTNVT.X	Solyc10g006720.2.1
query:2760;rank:1	-0.954627	0.930607	1	X.GLSSRHISST.X	Solyc11g010850.1.1
query:15911;rank:1	-0.95469	0.930607	1	X.PRSDLYLNLPALKKLDAMLISI.X	Solyc01g111930.2.1
query:7421;rank:1	-0.954726	0.930607	1	X.QMIAGSASSSSPSV.X	Solyc08g061590.2.1
query:12191;rank:1	-0.954825	0.930607	1	X.NAISSSDPKVATNKKVGN.X	Solyc09g010200.2.1
query:19720;rank:1	-0.954827	0.930607	1	X.YAMSEMGWGAGVVVMFMSWAITFYTI.X	Solyc12g027890.1.1
query:14472;rank:1	-0.954827	0.930607	1	X.SFKNSDDGTALLSFPSYA.X	Solyc07g043120.1.1
query:18550;rank:1	-0.954828	0.930607	1	X.AEILALISGALPILGLAEIGNAPQTAACGA.X	Solyc09g018070.1.1
query:12335;rank:1	-0.954924	0.930779	1	X.PKNLSLPPPGVPESVVRLV.X	Solyc11g064850.1.1
query:22409;rank:1	-0.954966	0.930779	1	X.IGNRISSLQQQQGHMPNATTYEIMVDVFVYGFF.X	Solyc11g044440.1.1
query:12165;rank:1	-0.955023	0.930864	1	X.TPKGVLKLMNVDSLTIY.X	Solyc04g050070.1.1
query:11877;rank:1	-0.955104	0.933905	1	X.PNAPPSSKKPKPESVAGGPN.X	Solyc05g051290.2.1
query:14398;rank:1	-0.955122	0.933905	1	X.PVLIPPIDKSPLIAPLMPIVS.X	Solyc02g078070.1.1
query:13226;rank:1	-0.955208	0.933905	1	X.SNSSHVQMMLLATVVYVI.X	Solyc07g021150.1.1
query:5822;rank:1	-0.955208	0.933905	1	X.CYVSFFKDQESF.X	Solyc12g009040.1.1
query:14376;rank:1	-0.955221	0.933905	1	X.DRPTMSNVVVMLGGESMTLPR.X	Solyc07g053120.2.1
query:15521;rank:1	-0.955242	0.933905	1	X.VWSAASSTSSCGGSKTDSVNN.X	Solyc12g017240.1.1
query:8809;rank:1	-0.955242	0.933905	1	X.SPVVTSIVVAGRIGSA.X	Solyc01g100250.2.1
query:19502;rank:1	-0.955381	0.934146	1	X.SGSLVLGGDSNTTIFKNSTPISYT.X	Solyc06g068550.2.1
query:12737;rank:1	-0.955381	0.934146	1	X.MACILSKLVKLNGMRSKN.X	Solyc03g124060.2.1
query:7318;rank:1	-0.955381	0.934146	1	X.VSKGITPDDSTYL.X	Solyc01g109060.2.1
query:15842;rank:1	-0.955589	0.941535	1	X.SPSMVKKRERLLKLLDSVVSL.X	Solyc02g064560.1.1
query:21020;rank:1	-0.955657	0.944175	1	X.TVGIHPSAAEEFVTMRSESRRISSNKPKTN.X	Solyc09g091840.2.1
query:5026;rank:1	-0.955657	0.944175	1	X.VILVISVPMLLI.X	Solyc08g016010.2.1
query:4918;rank:1	-0.955657	0.944175	1	X.SSGPSITSSSMD.X	Solyc08g076010.2.1
query:7651;rank:1	-0.955716	0.944242	1	X.KKPRDHGTPYSLT.X	Solyc03g119060.2.1
query:14576;rank:1	-0.955795	0.945586	1	X.STSAPIQSEERAKKRRRSS.X	Solyc07g021570.1.1
query:17550;rank:1	-0.955795	0.945586	1	X.FEGQVIHSMDHSKMDTKTATN.X	Solyc01g112120.2.1
query:5412;rank:1	-0.955815	0.946924	1	X.KKPSLVLIHGIGAN.X	Solyc11g009000.1.1
query:20812;rank:1	-0.955875	0.946924	1	X.MTINKIQGQTLQRVGVNLPKQVFTYGQVYV.X	Solyc09g061220.1.1
query:16454;rank:1	-0.955933	0.948441	1	X.KKKVVFEKLHLKPELKINKDK.X	Solyc11g007650.1.1
query:156;rank:1	-0.955933	0.948441	1	X.KVVCKKI.X	Solyc06g083960.1.1
query:14552;rank:1	-0.956066	0.948441	1	X.NYAASKRVGNERIVIYIKR.X	Solyc03g083840.2.1
query:9219;rank:1	-0.956066	0.948441	1	X.RNCKGLPLVIVLNAGII.X	Solyc05g009740.1.1
query:8053;rank:1	-0.956066	0.948441	1	X.WKVSTLTDVEEVK.X	Solyc08g007430.1.1
query:4821;rank:1	-0.956071	0.949701	1	X.SKNNTNKLTLAT.X	Solyc08g006990.1.1
query:16583;rank:1	-0.956209	0.950119	1	X.SEKLAVVFGLLKLPRGATIRVF.X	Solyc04g082870.1.1
query:9517;rank:1	-0.956209	0.950119	1	X.AGKLESYIEKKRRKN.X	Solyc06g073120.2.1
query:12093;rank:1	-0.956311	0.950119	1	X.TTESLLKQKPFVPRATVF.X	Solyc04g050150.2.1
query:18759;rank:1	-0.956348	0.950119	1	X.MNPQVLDALVSLFCRSNISAETLWDGG.X	Solyc07g018090.2.1
query:18264;rank:1	-0.956348	0.950119	1	X.CRLTATGKAIHRALKLLILGLFLQGG.X	Solyc11g040150.1.1
query:11683;rank:1	-0.956348	0.950119	1	X.LLFSRLIGLMFMSLGIN.X	Solyc09g056220.1.1
query:2627;rank:1	-0.956348	0.950119	1	X.TIHLDQAMIK.X	Solyc03g095790.1.1
query:13856;rank:1	-0.956509	0.952103	1	X.VIGVLGTIKMPYPSKAFDMA.X	Solyc05g007490.2.1
query:14812;rank:1	-0.956542	0.952103	1	X.VVSSKMDVVSAPPVYPSTKVCS.X	Solyc01g099220.2.1
query:6439;rank:1	-0.956542	0.952103	1	X.GYHKGLAAKEGCCYA.X	Solyc04g077190.2.1
query:7205;rank:1	-0.956624	0.952103	1	X.QPLWPPSVGSTPPQG.X	Solyc07g022760.2.1
query:15152;rank:1	-0.956638	0.952103	1	X.PHSLYAAVSVGLETETIIAVLSK.X	Solyc08g081340.2.1
query:6399;rank:1	-0.956638	0.952103	1	X.FVIGVSVVLGALFVF.X	Solyc01g090120.2.1
query:5348;rank:1	-0.956638	0.952103	1	X.TLNLSVLTPNRIV.X	Solyc01g017220.1.1
query:15261;rank:1	-0.956733	0.952103	1	X.KVIDISHKYVPDLPAYDSKSG.X	Solyc10g049970.1.1
query:3669;rank:1	-0.956762	0.952103	1	X.DMSLLKQFIVS.X	Solyc07g064400.1.1
query:10380;rank:1	-0.956806	0.952103	1	X.VLHLIAIARSVGLELTL.X	Solyc12g043020.1.1
query:1747;rank:1	-0.956806	0.952103	1	X.LRQDSPQVN.X	Solyc12g006940.1.1
query:21328;rank:1	-0.9569	0.952103	1	X.LPGGYGTMEELLEVITWSQLGIHEKPVGLLN.X	Solyc01g005680.2.1
query:4062;rank:1	-0.9569	0.952103	1	X.KIVNKATKKVT.X	Solyc03g005950.1.1
query:7490;rank:1	-0.956905	0.952103	1	X.NRSGSYMPHLSLL.X	Solyc02g071750.2.1
query:6933;rank:1	-0.956924	0.953326	1	X.GGVAGIVISILVVGAIVA.X	Solyc12g055720.1.1
query:3107;rank:1	-0.957004	0.95338	1	X.TVLKGLMEVM.X	Solyc09g064290.1.1
query:19581;rank:1	-0.957019	0.953488	1	X.RKSSAASSSSSSTMPNDLLNQQYSNNGSN.X	Solyc04g071510.2.1
query:9209;rank:1	-0.957019	0.953488	1	X.ELFSTNYETPPSS.X	Solyc09g065770.1.1
query:19939;rank:1	-0.957038	0.953542	1	X.ASIKQVVDSSFMLMKESVSSYGSNN.X	Solyc05g008520.2.1
query:23239;rank:1	-0.957176	0.958237	1	X.SQAFSVLNHMLEIGRLPNVQLYGILINALSKNGKLSDAM.X	Solyc03g118280.1.1
query:16531;rank:1	-0.957202	0.959584	1	X.KKLNPPSKKLTTPRISRRAVSI.X	Solyc12g088480.1.1
query:2237;rank:1	-0.957301	0.959584	1	X.VVSKKSLVAN.X	Solyc01g086850.2.1
query:17828;rank:1	-0.957305	0.959584	1	X.QFPIQRFLQSQLKTVVIAWISLA.X	Solyc04g074850.2.1
query:1263;rank:1	-0.957305	0.959584	1	X.AGMVGKVTVN.X	Solyc04g082010.1.1
query:13579;rank:1	-0.957315	0.959631	1	X.ETIPLSILHLAIRGVTPDT.X	Solyc01g018060.1.1
query:9129;rank:1	-0.9574	0.961982	1	X.GFEIRKGPKTHNRNK.X	Solyc03g044690.1.1
query:18084;rank:1	-0.957453	0.963218	1	X.IVPHSSSSSSSHCANNKGFSSDSS.X	Solyc06g060360.2.1
query:12523;rank:1	-0.957453	0.963218	1	X.QEIFGQLTQVRFLVLHGN.X	Solyc06g069650.2.1
query:20957;rank:1	-0.957591	0.964208	1	X.GQVIAESSQPMRPSLSEGTPGTPDMMTR.X	Solyc01g103120.2.1
query:16173;rank:1	-0.957591	0.964208	1	X.TIRKVGDASQKVGGAAIQQIVLEG.X	Solyc03g025540.2.1
query:3061;rank:1	-0.957591	0.964208	1	X.AVSLKFSQTFV.X	Solyc02g094180.2.1
query:17912;rank:1	-0.957686	0.964208	1	X.FYVITWESPKEQIFEMPTGGAAIM.X	Solyc06g054260.1.1
query:17913;rank:1	-0.957729	0.964208	1	X.SSKNSMHLFPVVLHLLGCASLKR.X	Solyc08g013940.2.1
query:4598;rank:1	-0.957781	0.964208	1	X.ISAAWYAFIHAN.X	Solyc06g082960.2.1
query:8874;rank:1	-0.957797	0.964208	1	X.SVMTIFQLLCSIFKN.X	Solyc01g112350.2.1
query:2033;rank:1	-0.957867	0.964208	1	X.LFLVAAFVVI.X	Solyc10g083750.1.1
query:21841;rank:1	-0.957877	0.964208	1	X.MAATRSLRQGDFQKAFDVINSLDVWRLLRNK.X	Solyc01g102590.2.1
query:11132;rank:1	-0.957877	0.964208	1	X.TIRIVLGFMLIALIWK.X	Solyc03g117150.2.1
query:7349;rank:1	-0.957877	0.964208	1	X.QKRRAALNDFDRF.X	Solyc09g066430.2.1
query:9042;rank:1	-0.958005	0.964208	1	X.QGSGSSVPNATPVNCKVE.X	Solyc01g100050.2.1
query:7607;rank:1	-0.958005	0.964208	1	X.TGGLNKTMAMIVVF.X	Solyc03g005150.2.1
query:17505;rank:1	-0.958094	0.964208	1	X.LMVGSSGHSSTEVFNSIMKT.X	Solyc08g061090.2.1
query:22011;rank:1	-0.958163	0.964208	1	X.ETSHLLPQDPYEKAMARFWAKFVDDKFKNLN.X	Solyc01g081260.1.1
query:4956;rank:1	-0.958163	0.964208	1	X.SSISKLSYLRVF.X	Solyc03g005670.2.1
query:6086;rank:1	-0.958282	0.964208	1	X.IGKSKIHKETLRN.X	Solyc08g023310.1.1
query:21559;rank:1	-0.958282	0.964208	1	X.SPAGETTEGNSIVSESSSPAVVATATTEDENIVSA.X	Solyc06g054650.2.1
query:21890;rank:1	-0.95849	0.964208	1	X.KDGVLSKALKNRVEMERVRREFLCNSSQALK.X	Solyc04g009990.2.1
query:22385;rank:1	-0.958544	0.964208	1	X.NTQASQMTASDKVLKQRSKIQTGVNSRYLYGFV.X	Solyc03g119750.2.1
query:6305;rank:1	-0.958544	0.964208	1	X.MKDMSVLMKQVM.X	Solyc05g056510.2.1
query:5828;rank:1	-0.958544	0.964208	1	X.TATFVPSLETLLK.X	Solyc05g008520.2.1
query:18809;rank:1	-0.958558	0.964208	1	X.GILSLFAAQAGASRVIAVEASEKMAAVAAK.X	Solyc01g096550.2.1
query:18590;rank:1	-0.958558	0.964208	1	X.STMEIVSMVLVGKVNKHLVSLINKA.X	Solyc11g005620.1.1
query:15434;rank:1	-0.958558	0.964208	1	X.TYATHRMRVLNKILQLMSIQ.X	Solyc12g013500.1.1
query:19607;rank:1	-0.958589	0.964208	1	X.KKLITLAMDRKNKEKEMASVLLSALHI.X	Solyc03g111630.2.1
query:14044;rank:1	-0.958589	0.964208	1	X.FSTMWLELVGFSHKTTALI.X	Solyc05g051910.1.1
query:13689;rank:1	-0.958589	0.964208	1	X.ARPPRGVLLVGLPGTGKTLLAK.X	Solyc06g005950.2.1
query:1968;rank:1	-0.958589	0.964208	1	X.ATALSSKGLR.X	Solyc01g102950.2.1
query:3135;rank:1	-0.958639	0.964208	1	X.RLATSGANFARA.X	Solyc08g013670.2.1
query:18548;rank:1	-0.958696	0.964208	1	X.VRVLADIPITGKPTKVRMGRGKGNPTG.X	Solyc09g015860.1.1
query:11031;rank:1	-0.95883	0.964208	1	X.IEVTRFVFLASFNMLGN.X	Solyc10g083700.2.1
query:15778;rank:1	-0.958834	0.964208	1	X.VNDQCELPSGHRHSSVSSVD.X	Solyc10g081340.1.1
query:4742;rank:1	-0.958886	0.964208	1	X.LPSSPSEVLYTW.X	Solyc02g020890.2.1
query:22234;rank:1	-0.958972	0.964208	1	X.GNIIGATTQYWIPTPSQILVGFTHFSCHICHKT.X	Solyc04g074320.1.1
query:15600;rank:1	-0.958972	0.964208	1	X.YTSTTSSCSSNVSSSSSLAL.X	Solyc11g069190.1.1
query:12287;rank:1	-0.958986	0.964208	1	X.HGLNRVQIYGAEKLHQVL.X	Solyc01g099710.2.1
query:6202;rank:1	-0.95902	0.964208	1	X.EIGIVFEHPTQPGN.X	Solyc11g013810.1.1
query:4658;rank:1	-0.95902	0.964208	1	X.LDNEVLVKLVGGN.X	Solyc03g059150.2.1
query:1895;rank:1	-0.95902	0.964208	1	X.MLIGIVAIVF.X	Solyc06g071400.2.1
query:4228;rank:1	-0.959085	0.964208	1	X.EDRPNMSTVIM.X	Solyc07g063770.2.1
query:18226;rank:1	-0.95911	0.964208	1	X.MLTAGTDTTASTMEWALSLLLN.X	Solyc12g088460.1.1
query:16613;rank:1	-0.95911	0.964208	1	X.SSVLSTEYSMGSMADLAGVSMS.X	Solyc05g054860.1.1
query:9412;rank:1	-0.95911	0.964208	1	X.ESSIKGTRKILHSN.X	Solyc01g006440.1.1
query:15979;rank:1	-0.959116	0.964208	1	X.MMGSHGIISSSSNTHNASSLRF.X	Solyc11g009060.1.1
query:5346;rank:1	-0.959116	0.964208	1	X.LNFLAILNLSQN.X	Solyc12g009770.1.1
query:9854;rank:1	-0.959211	0.964208	1	X.VVTVQGLPTSMNGLRLS.X	Solyc10g006330.2.1
query:22717;rank:1	-0.959249	0.964208	1	X.SGAESTKEDNEENVELEKSNVLLMGPTGSGKTLLAKT.X	Solyc06g063410.2.1
query:6290;rank:1	-0.959283	0.964208	1	X.VVLIVVIVVVATVF.X	Solyc12g062980.1.1
query:3837;rank:1	-0.959283	0.964208	1	X.QDADGSSTCS.X	Solyc09g009080.2.1
query:12149;rank:1	-0.959306	0.964208	1	X.IPNSLLNQESLQFLLLSH.X	Solyc01g006550.2.1
query:4954;rank:1	-0.959306	0.964208	1	X.ISPKLTKYAAPPN.X	Solyc06g069600.1.1
query:17833;rank:1	-0.959382	0.964323	1	X.FLEFLSEKFEVVVFTAGLKEYASL.X	Solyc02g071930.1.1
query:6806;rank:1	-0.959387	0.964323	1	X.IFAAADITSQMIAMT.X	Solyc04g078040.2.1
query:16735;rank:1	-0.959525	0.964323	1	X.FSRHKASWQELAGVLVFSAIPFT.X	Solyc04g082920.2.1
query:14149;rank:1	-0.95958	0.964323	1	X.RSVPTAFKLFTGSAWMVLS.X	Solyc02g087550.2.1
query:7614;rank:1	-0.95958	0.964323	1	X.KAEEVVEKRNKKSI.X	Solyc04g054190.2.1
query:8670;rank:1	-0.959592	0.964323	1	X.INRPSMRRVVKMLQ.X	Solyc02g077630.2.1
query:1566;rank:1	-0.959592	0.964323	1	X.SAASTYYD.X	Solyc12g036470.1.1
query:9949;rank:1	-0.959663	0.964323	1	X.KSGGGISAGGGISSGITGGPLAG.X	Solyc11g062070.1.1
query:20272;rank:1	-0.959687	0.964323	1	X.KKLEFNSSRVSPIPNGTSQWGALNISKSF.X	Solyc11g065120.1.1
query:2517;rank:1	-0.959687	0.964323	1	X.GALLGACRVHGN.X	Solyc01g096440.2.1
query:16285;rank:1	-0.959801	0.964323	1	X.GGDATKVSILPSGIIISPDGRLSSN.X	Solyc05g015020.1.1
query:15620;rank:1	-0.959801	0.964323	1	X.GKTYLLRILNAAMHEILFFAI.X	Solyc12g056820.1.1
query:3513;rank:1	-0.959801	0.964323	1	X.VFLYRDFMSA.X	Solyc03g025500.2.1
query:14998;rank:1	-0.959878	0.964323	1	X.HIGGSIPSNLPITLKTLSLSGN.X	Solyc02g078780.2.1
query:4137;rank:1	-0.959878	0.964323	1	X.LLKMAKLSNDT.X	Solyc08g079450.2.1
query:21037;rank:1	-0.959939	0.964323	1	X.IITSSLLQDGTTQAEISTSTISTSPTAGA.X	Solyc06g074120.2.1
query:8210;rank:1	-0.959939	0.964323	1	X.KMKGKIPEIASSHVS.X	Solyc01g065580.2.1
query:4148;rank:1	-0.959939	0.964323	1	X.KMAIVLITLMA.X	Solyc12g005810.1.1
query:6216;rank:1	-0.959976	0.964323	1	X.GASMASSHQQIS.X	Solyc03g095410.2.1
query:5964;rank:1	-0.959976	0.964323	1	X.SSSPSSTLSESSN.X	Solyc07g008540.2.1
query:19905;rank:1	-0.960077	0.964323	1	X.FDILPAKNLVSWNTMVVGYAQHGFGKEA.X	Solyc11g007230.1.1
query:13184;rank:1	-0.960077	0.964323	1	X.SSQPYPSTLPGIPKGSARQL.X	Solyc09g060080.2.1
query:12118;rank:1	-0.960174	0.964323	1	X.VTAAGLLLSNPIEFAAGMI.X	Solyc03g025320.2.1
query:1664;rank:1	-0.960215	0.964323	1	X.SGKGKHHPTC.X	Solyc06g082520.2.1
query:15685;rank:1	-0.960273	0.964323	1	X.LDRQILSRFQRPPGAIPSSMI.X	Solyc02g089820.2.1
query:21745;rank:1	-0.960355	0.964323	1	X.GSSSGSAAIVASGLCSAALGTDAGGSVRIPASLC.X	Solyc01g106330.2.1
query:12934;rank:1	-0.960355	0.964323	1	X.AEPGTDHLSGMAASVLEGLVS.X	Solyc10g079510.1.1
query:1689;rank:1	-0.960355	0.964323	1	X.SGCLKMRKL.X	Solyc02g089790.2.1
query:19015;rank:1	-0.96045	0.964323	1	X.QLSVPSSTSTSVSSPTPPTAARD.X	Solyc01g102550.2.1
query:15545;rank:1	-0.96045	0.964323	1	X.IVSGSDDCTVILWDLSSMVFV.X	Solyc09g065700.2.1
query:6542;rank:1	-0.960472	0.964323	1	X.RLEHANVQSWLSG.X	Solyc07g064190.1.1
query:18864;rank:1	-0.960545	0.965553	1	X.KPNTQSPPPSSNSNSSSSSSSSS.X	Solyc03g034060.2.1
query:16169;rank:1	-0.960545	0.965553	1	X.FLRGFLKRSGVTQLVTGYLPSV.X	Solyc12g088230.1.1
query:5219;rank:1	-0.960545	0.965553	1	X.SSIIADALDSIPLL.X	Solyc03g007830.2.1
query:19264;rank:1	-0.960571	0.965553	1	X.PAKPAGSRASTSNHAPKVTNGLKRKIDMV.X	Solyc03g043760.2.1
query:16010;rank:1	-0.960571	0.965553	1	X.AAKLPSNSILFNTRVVSVDSGS.X	Solyc02g083410.2.1
query:17727;rank:1	-0.96063	0.966667	1	X.TIVGAGIMALPATMKSLGLIPGIAMI.X	Solyc02g065680.2.1
query:15194;rank:1	-0.96063	0.966667	1	X.RLMKKKILQSQCSSCDDSDLS.X	Solyc01g006790.2.1
query:18897;rank:1	-0.96067	0.967742	1	X.HSSSVRSKTSSESSWDGSSS.X	Solyc10g009490.1.1
query:9933;rank:1	-0.960736	0.967775	1	X.MDLFSGGSTTSAST.X	Solyc09g066370.1.1
query:11471;rank:1	-0.960768	0.969886	1	X.KPPTSSKLPLIILVARL.X	Solyc01g005040.2.1
query:8405;rank:1	-0.960831	0.973817	1	X.RDSSKVIEMVDSKLN.X	Solyc07g062170.1.1
query:2677;rank:1	-0.960831	0.973817	1	X.KIFTSSSALY.X	Solyc06g008620.1.1
query:15924;rank:1	-0.960906	0.973817	1	X.ETTHTARSSTNSPTRSN.X	Solyc00g007120.2.1
query:7556;rank:1	-0.960906	0.973817	1	X.FTIAVVNKDPKKSK.X	Solyc03g005430.2.1
query:11712;rank:1	-0.960926	0.973817	1	X.RNKKEAIMALAEAERTL.X	Solyc01g087750.2.1
query:10882;rank:1	-0.960926	0.973817	1	X.KLTHLVLVRCELNPPPN.X	Solyc04g005900.2.1
query:21379;rank:1	-0.961022	0.973817	1	X.FRYNHQAAHDALKGLKVTVNHRRTSQKFV.X	Solyc02g069270.2.1
query:14790;rank:1	-0.961022	0.973817	1	X.LAHNMAVVGERHIRVDRACPP.X	Solyc08g076660.2.1
query:2340;rank:1	-0.961022	0.973817	1	X.CRIFVGGLSW.X	Solyc03g071560.2.1
query:21059;rank:1	-0.961044	0.973817	1	X.ALVMIVVQPLTILCFYTRKVLLSTMTAKFV.X	Solyc03g093650.2.1
query:15108;rank:1	-0.961044	0.973817	1	X.VALAVVFVVITAGIVIVKVINGSI.X	Solyc04g077460.2.1
query:5142;rank:1	-0.961044	0.973817	1	X.KTVGCTISGSIL.X	Solyc04g025170.2.1
query:2568;rank:1	-0.961044	0.973817	1	X.GPLLPIITLKN.X	Solyc02g084640.2.1
query:2651;rank:1	-0.961117	0.973817	1	X.SSLGGLKNLGVF.X	Solyc04g008430.1.1
query:14986;rank:1	-0.961182	0.973817	1	X.ALIHKVISRKPFEVQLSWLN.X	Solyc03g019640.1.1
query:12213;rank:1	-0.961182	0.973817	1	X.SDSTTEKKNDKNESSKL.X	Solyc02g087540.1.1
query:7722;rank:1	-0.961182	0.973817	1	X.RKTLKKSISLLPSL.X	Solyc02g032920.2.1
query:1970;rank:1	-0.961182	0.973817	1	X.GSVLGACAVVK.X	Solyc11g007230.1.1
query:17266;rank:1	-0.961264	0.973817	1	X.SVLCRTTTLESQIRSITKQTLK.X	Solyc02g078160.2.1
query:15908;rank:1	-0.961264	0.973817	1	X.DLVHLSYLDLSGNKICSLPKRL.X	Solyc09g059830.1.1
query:15940;rank:1	-0.961321	0.973817	1	X.IPVHGGLGGGYFFRNSRGESVAIV.X	Solyc04g005270.1.1
query:11455;rank:1	-0.961321	0.973817	1	X.KMSFAPLGARRSRGSRE.X	Solyc00g049210.1.1
query:17754;rank:1	-0.961363	0.973817	1	X.ISFAVNKTVATGTSIMTPSVVAVSSQG.X	Solyc02g085070.1.1
query:17695;rank:1	-0.961403	0.973817	1	X.KKKLIRKALDMIRKLAEEDPDET.X	Solyc04g081570.2.1
query:9597;rank:1	-0.961403	0.973817	1	X.QELSVYILMILAHQSS.X	Solyc02g076930.1.1
query:3633;rank:1	-0.961459	0.973817	1	X.AVLTIITSYHR.X	Solyc06g072350.2.1
query:3088;rank:1	-0.961459	0.973817	1	X.KPLSMLPFSL.X	Solyc07g066020.2.1
query:15371;rank:1	-0.961462	0.973817	1	X.DRIIAKGEEATAALDAKMKKFT.X	Solyc01g067390.2.1
query:20042;rank:1	-0.961561	0.973817	1	X.RKRHSTLTKRIWISLLILISGRFRPS.X	Solyc02g077190.1.1
query:19864;rank:1	-0.961593	0.973817	1	X.KDFEKAKEVMNWVERSGIKVSVILYN.X	Solyc11g073270.1.1
query:18435;rank:1	-0.961597	0.979879	1	X.RPIIIPSPPLLSLDKRQPLLSSN.X	Solyc10g081700.1.1
query:10607;rank:1	-0.961759	0.982915	1	X.VISCASMEVLQAYLLW.X	Solyc04g051600.2.1
query:7717;rank:1	-0.961784	0.983936	1	X.AITIGLIAGVALLIVF.X	Solyc04g007950.2.1
query:4972;rank:1	-0.961873	0.986961	1	X.SIRAARIYAKHN.X	Solyc03g005280.2.1
query:15435;rank:1	-0.961975	0.986987	1	X.GSSSSTISDETTYDTEL.X	Solyc02g088310.1.1
query:5407;rank:1	-0.962011	0.986987	1	X.RKSVQGMRGVTKV.X	Solyc02g083550.1.1
query:1740;rank:1	-0.962057	0.989066	1	X.ISDNLGQPVN.X	Solyc11g005550.1.1
query:17944;rank:1	-0.962057	0.989066	1	X.SPTTDRVFKDKSVETMVKDLF.X	Solyc11g020770.1.1
query:13599;rank:1	-0.962057	0.989066	1	X.LEVLLGGDDGSLAFIPGNFSVS.X	Solyc04g082010.1.1
query:7992;rank:1	-0.96207	0.989066	1	X.WESMIPLGFLAATGV.X	Solyc04g074860.2.1
query:17547;rank:1	-0.962149	0.989066	1	X.PLQSSASTTTATVTSSASSSMTN.X	Solyc01g007770.2.1
query:16546;rank:1	-0.962149	0.989066	1	X.PELVTTTSGSCESKMSSTMV.X	Solyc01g006600.1.1
query:905;rank:1	-0.962149	0.989066	1	X.SSLSKSGSP.X	Solyc01g017340.1.1
query:9434;rank:1	-0.962288	0.995054	1	X.HALLTKIASVREVVMGA.X	Solyc11g068610.1.1
query:7414;rank:1	-0.962354	0.995054	1	X.SYFRRLITKVIVF.X	Solyc01g105890.2.1
query:2559;rank:1	-0.962354	0.995054	1	X.NLNRSKSGKSS.X	Solyc04g082110.2.1
query:9141;rank:1	-0.962354	0.995054	1	X.GDKTLMRFLIARSMN.X	Solyc01g005290.2.1
query:536;rank:1	-0.962354	0.995054	1	X.IVAPAGPVF.X	Solyc01g099600.2.1
query:2724;rank:1	-0.962426	0.995064	1	X.AILLWLAANTN.X	Solyc10g085600.1.1
query:1936;rank:1	-0.962426	0.995064	1	X.SKGGFVIKMP.X	Solyc01g087460.1.1
query:20517;rank:1	-0.962453	0.996055	1	X.VSKHLLDNNEKDSKKKLLAVIGVSTNFGN.X	Solyc08g081920.2.1
query:13879;rank:1	-0.962552	0.996063	1	X.GIFGATVFQILMTLPRIVMV.X	Solyc02g077270.2.1
query:12534;rank:1	-0.962552	0.996063	1	X.LTILLWPLVVIGSVIMAVF.X	Solyc02g090690.1.1
query:22739;rank:1	-0.962564	0.996075	1	X.ILMTGKWNESISYQPCDLEGEPMAGSTLKEVWKAA.X	Solyc10g084800.1.1
query:13560;rank:1	-0.962564	0.996075	1	X.GVKKMGEIQLAVRFSCSSVF.X	Solyc01g086700.2.1
query:6511;rank:1	-0.962564	0.996075	1	X.RALAAIGAGVSGLLSFA.X	Solyc06g067920.2.1
query:18595;rank:1	-0.962642	0.997062	1	X.LMQTHIMPAVVAPREVSRNTSVENK.X	Solyc09g083390.1.1
query:9217;rank:1	-0.962651	0.997062	1	X.LIIEEGGVAPLLKLAKE.X	Solyc01g111270.2.1
query:16207;rank:1	-0.96275	0.99809	1	X.LAGMLAGRFLVGLGLGVGPPVASLY.X	Solyc07g020790.2.1
query:139;rank:1	-0.96284	0.99809	1	X.QPMPSVSA.X	Solyc04g076360.2.1
query:22819;rank:1	-0.962849	0.99809	1	X.PKNIKTTPLLKNPRRPSLYYVNLTSVSVGRVSVPIAP.X	Solyc12g087940.1.1
query:17349;rank:1	-0.962849	0.99809	1	X.AAIAMASTTSSAAKMLLSGSMPS.X	Solyc07g051840.2.1
query:19916;rank:1	-0.962928	0.99809	1	X.LDFLDSGDMGISIQLMYEKLHIFSPLV.X	Solyc10g018030.1.1
query:3917;rank:1	-0.962978	0.99809	1	X.PGIGLGALLSGARN.X	Solyc01g094200.2.1
query:22917;rank:1	-0.962978	0.99809	1	X.STRKRMSVIVKDEDGKILLLSKGADSIMFERLSKSG.X	Solyc05g010120.2.1
query:20006;rank:1	-0.963116	0.99809	1	X.EIGVKSDEYSLSILLGLFNGRMGLSKAK.X	Solyc06g048900.1.1
query:19806;rank:1	-0.963116	0.99809	1	X.KKIEMKLIESERARAVSFSKRKKTL.X	Solyc02g032000.1.1
query:10031;rank:1	-0.963118	0.99809	1	X.TAMTGEMTLRGMVLP.X	Solyc08g077440.2.1
query:22503;rank:1	-0.963146	0.99809	1	X.KLDFPNKMMNRPAKVDTSVINGTYKAFVEIIFQN.X	Solyc09g055930.2.1
query:13053;rank:1	-0.963146	0.99809	1	X.TPKPLSIRKGSGTQLKDIPN.X	Solyc03g097490.2.1
query:5861;rank:1	-0.963214	0.99809	1	X.GDLLGFFGGFGFAPT.X	Solyc05g009700.2.1
query:16817;rank:1	-0.963245	0.99809	1	X.FTMSTTTSDHPDHHQQHSGN.X	Solyc06g051940.2.1
query:11670;rank:1	-0.963255	0.99809	1	X.LLHANYLVMVLTSMLWV.X	Solyc03g026010.1.1
query:10176;rank:1	-0.963255	0.99809	1	X.TPFTRFSEITGAGGRTV.X	Solyc09g065180.2.1
query:9601;rank:1	-0.963255	0.99809	1	X.ILEVYTKAYKKMSKN.X	Solyc10g019040.1.1
query:21288;rank:1	-0.963345	0.99809	1	X.PIGGMAVILALVEAAETRDMLHMALTLLACALH.X	Solyc09g065700.2.1
query:19967;rank:1	-0.963444	0.99809	1	X.GVNKPVGTTGTGFVKEAVKYMVMDDLVVK.X	Solyc06g069810.1.1
query:5463;rank:1	-0.963444	0.99809	1	X.FSSLMPNNQRKGG.X	Solyc11g072430.1.1
query:13771;rank:1	-0.963499	0.99809	1	X.LQRGYKKVSPFFIPYSIT.X	Solyc08g082620.2.1
query:2395;rank:1	-0.963499	0.99809	1	X.ISPIVATLAAN.X	Solyc01g095980.2.1
query:17014;rank:1	-0.963531	0.99809	1	X.LSSGQSGVTTMTGAVPLAGSAQN.X	Solyc12g070100.1.1
query:13854;rank:1	-0.963531	0.99809	1	X.KKKQRANYRFTPFTPHNT.X	Solyc01g073770.2.1
query:17448;rank:1	-0.963543	0.99809	1	X.IGTLAATLTTSALYLVSVLFFGSVAT.X	Solyc02g021620.2.1
query:4717;rank:1	-0.963543	0.99809	1	X.ICPKFPKLSKTN.X	Solyc05g008650.1.1
query:18092;rank:1	-0.963595	1	1	X.NSMREKRSECIPDVVTYTTIM.X	Solyc04g015950.1.1
query:15857;rank:1	-0.96369	1	1	X.SARSSSSREADRSGELSVSN.X	Solyc06g062880.1.1
query:12279;rank:1	-0.963741	1	1	X.MKAVVDVIGRMKVAVTVLN.X	Solyc09g005630.2.1
query:10003;rank:1	-0.963741	1	1	X.RKRNRFFKLISAFV.X	Solyc02g092140.1.1
query:12404;rank:1	-0.963785	1	1	X.KGILIQGPVFVSFFMAISN.X	Solyc08g008320.2.1
query:6311;rank:1	-0.963785	1	1	X.MSKQNGVAKLIRK.X	Solyc03g083230.1.1
query:22710;rank:1	-0.963881	1	1	X.STRLSRLKAAAISLSARHADGSLPVEDFNLELENQ.X	Solyc07g007370.2.1
query:21843;rank:1	-0.963881	1	1	X.VMVRMTFKALVDRFVERNNLVIALVQSNISW.X	Solyc08g014210.1.1
query:10623;rank:1	-0.963881	1	1	X.KSKKQKRSVFSRIHL.X	Solyc04g014380.2.1
query:18808;rank:1	-0.963939	1	1	X.KNITVKFRDLTYQLPPKSISILPD.X	Solyc11g018490.1.1
query:13562;rank:1	-0.963945	1	1	X.LMVLYIALYMTALGTGGLKSS.X	Solyc08g007430.1.1
query:21532;rank:1	-0.964071	1	1	X.SGVPAKDLEKLKKTRGDIRSLSSQKTDIGFPASC.X	Solyc06g008960.2.1
query:13665;rank:1	-0.964071	1	1	X.MPPMATAESPSMSMSPGS.X	Solyc11g072030.1.1
query:9341;rank:1	-0.964083	1	1	X.QRAFLIGLDKVGKGNW.X	Solyc05g013420.1.1
query:11151;rank:1	-0.964222	1	1	X.YTSTDDSTLPQDMYR.X	Solyc11g068500.1.1
query:19041;rank:1	-0.964262	1	1	X.KNTHHSSGKMSSLAIIAIILGDVLVLCV.X	Solyc05g009100.2.1
query:12956;rank:1	-0.964262	1	1	X.QVGGVTVPSTAGTSAGGLT.X	Solyc11g017140.1.1
query:3042;rank:1	-0.964357	1	1	X.QPMMTDDWW.X	Solyc09g007820.1.1
query:7934;rank:1	-0.96436	1	1	X.SIGLTIPAVSVVCIMY.X	Solyc00g122530.1.1
query:6073;rank:1	-0.96436	1	1	X.GMSNAGGSVTMSVDN.X	Solyc12g016080.1.1
query:14162;rank:1	-0.96436	1	1	X.EFIAVGKLRGTSQGKIICLSGP.X	Solyc10g024320.1.1
query:18782;rank:1	-0.964434	1	1	X.CRRADFLESCIDLYFSCVRAAQAVK.X	Solyc09g065700.2.1
query:12078;rank:1	-0.964434	1	1	X.LVKASTIEKSIETLTST.X	Solyc12g009920.1.1
query:19108;rank:1	-0.964498	1	1	X.IGGGMLISPLLIQVGITPEVTAATCSFMV.X	Solyc02g079980.2.1
query:12493;rank:1	-0.964498	1	1	X.RPRKTRLGQPSSGNPATPP.X	Solyc10g077070.1.1
query:19959;rank:1	-0.964533	1	1	X.KHRSSAAKVSVKGKSLEQRMKEKEIKK.X	Solyc02g094490.2.1
query:17491;rank:1	-0.964533	1	1	X.MASHFTNLGFVLGRIISECLGIPPN.X	Solyc03g116260.2.1
query:16934;rank:1	-0.964533	1	1	X.RKMVLPTHKKQVRRMVEKRGL.X	Solyc07g041860.1.1
query:13924;rank:1	-0.964643	1	1	X.FEGTVGGASEALEELTEADLK.X	Solyc05g044510.1.1
query:15383;rank:1	-0.964738	1	1	X.VGNSSSSNCSSGKLFTWGDGD.X	Solyc12g099740.1.1
query:15327;rank:1	-0.964738	1	1	X.AKKVAAAKKKNADKTLVNNLVN.X	Solyc07g008700.2.1
query:14322;rank:1	-0.964738	1	1	X.KPEIPTSPKPKIPTFSKPDI.X	Solyc01g105740.1.1
query:4680;rank:1	-0.964738	1	1	X.YACVIRVLAHTQ.X	Solyc01g104590.2.1
query:17124;rank:1	-0.964831	1	1	X.YTEMASRHRVRHHCIQIIKTA.X	Solyc02g070650.2.1
query:5667;rank:1	-0.964831	1	1	X.IRGSESVFSGSN.X	Solyc01g009070.2.1
query:12581;rank:1	-0.964834	1	1	X.DILVKILCGLSAEDLLRCQ.X	Solyc01g102320.1.1
query:13803;rank:1	-0.964912	1	1	X.SPASSCVSREPTPDHQE.X	Solyc06g073990.1.1
query:12234;rank:1	-0.964929	1	1	X.KPVGTDGISVDGKIIKVVS.X	Solyc02g020940.2.1
query:5994;rank:1	-0.964929	1	1	X.ETFELKIVHRKN.X	Solyc06g072340.2.1
query:6915;rank:1	-0.965024	1	1	X.WRGKTRFNPSGIST.X	Solyc11g066710.1.1
query:3764;rank:1	-0.965029	1	1	X.VPVGIFPRDATN.X	Solyc10g076420.1.1
query:20193;rank:1	-0.96505	1	1	X.APLRCKTCSSILNPFCRVDFQALIWIC.X	Solyc09g092680.2.1
query:10028;rank:1	-0.96505	1	1	X.VESGEVSISSASLVEM.X	Solyc01g110190.2.1
query:20508;rank:1	-0.965128	1	1	X.QPKLRGEGGVKALQGMVRSRHPDVLAQVARG.X	Solyc08g079710.2.1
query:13556;rank:1	-0.965128	1	1	X.SRAVIAERRGNEVMAVDLSI.X	Solyc05g018300.2.1
query:12288;rank:1	-0.965215	1	1	X.TYGAIIPLVIFVPLGLLIY.X	Solyc05g052990.2.1
query:8528;rank:1	-0.965227	1	1	X.KKKSMDTIILSLVAS.X	Solyc06g065740.2.1
query:777;rank:1	-0.96531	1	1	X.QKVMAMSP.X	Solyc12g008420.1.1
query:12064;rank:1	-0.965327	1	1	X.DPKSLLFIFGMQLDYSDA.X	Solyc05g051700.2.1
query:10284;rank:1	-0.965327	1	1	X.SYYGYDGSASSSDE.X	Solyc03g095610.2.1
query:17836;rank:1	-0.965406	1	1	X.IGELKDMKKMKGMKMKKTNKGGAVV.X	Solyc01g020560.1.1
query:5363;rank:1	-0.965406	1	1	X.LDNVFWVISVLG.X	Solyc06g075440.1.1
query:4161;rank:1	-0.965406	1	1	X.DDDRIELLLSQ.X	Solyc11g067100.1.1
query:13197;rank:1	-0.965425	1	1	X.RVSKRLETQKQEGLSVF.X	Solyc06g008350.2.1
query:16175;rank:1	-0.965501	1	1	X.SVVSIYYYLKIIKLLMTGRNK.X	Solyc08g077160.1.1
query:5107;rank:1	-0.965501	1	1	X.TKTKVRSLLQKL.X	Solyc08g008490.2.1
query:1288;rank:1	-0.965501	1	1	X.KSSWIPLS.X	Solyc02g089090.2.1
query:20898;rank:1	-0.965524	1	1	X.LPLPPNPLLPPPSILPPNPFLPPPSIIPPIIP.X	Solyc02g089250.2.1
query:9826;rank:1	-0.965524	1	1	X.IQLLEVPKIVASFILS.X	Solyc04g080400.1.1
query:2191;rank:1	-0.965623	1	1	X.KAYKKMSKN.X	Solyc10g019040.1.1
query:13265;rank:1	-0.965691	1	1	X.PSPHPLPSTSSEAPATSPSPLN.X	Solyc06g074810.2.1
query:14987;rank:1	-0.965741	1	1	X.AKYLIDVFKIGLRLCRGVAEN.X	Solyc08g016240.1.1
query:15566;rank:1	-0.965787	1	1	X.YTRNPLILRILPPLWPNLKE.X	Solyc07g055120.2.1
query:9589;rank:1	-0.965787	1	1	X.VGKTELAKALANYLFN.X	Solyc02g088610.2.1
query:18100;rank:1	-0.965821	1	1	X.AHSEASSVSGGVLDDLDPLNGFSKS.X	Solyc06g082840.2.1
query:7277;rank:1	-0.965879	1	1	X.VVVAGLVGKMDPTHD.X	Solyc11g006630.1.1
query:13097;rank:1	-0.965882	1	1	X.KNISVVAGIEARGFIFGPPIA.X	Solyc04g077970.2.1
query:19641;rank:1	-0.96592	1	1	X.RISIKSVSRIAWSLQIRLSLHSS.X	Solyc05g010410.1.1
query:17844;rank:1	-0.96592	1	1	X.NSTTSTLATTSPSIASQMISL.X	Solyc01g095860.2.1
query:16643;rank:1	-0.96592	1	1	X.PISGSTYPGGLPPALKVLKKVLYT.X	Solyc12g014360.1.1
query:14172;rank:1	-0.96592	1	1	X.MKLCLLLNVIDPKIGGVMIMG.X	Solyc10g008740.2.1
query:3347;rank:1	-0.96592	1	1	X.VVYQLLLRMV.X	Solyc01g005020.2.1
query:7709;rank:1	-0.965977	1	1	X.PSATQSKLIELIRK.X	Solyc05g052160.2.1
query:13149;rank:1	-0.966017	1	1	X.PEFYTEDVIKSIMLVIFV.X	Solyc04g078370.2.1
query:23473;rank:1	-0.966073	1	1	X.KPVVLAGPVLPEPMETSNTEENWSKWLEKFQEKTVILCAF.X	Solyc10g008860.1.1
query:16924;rank:1	-0.966073	1	1	X.RTPAKSLSFRFFSQSKQVQTAK.X	Solyc09g065840.2.1
query:6400;rank:1	-0.966073	1	1	X.LDVNESWALFMEN.X	Solyc08g007250.1.1
query:2786;rank:1	-0.966073	1	1	X.WKSYFPHEN.X	Solyc11g012360.1.1
query:7945;rank:1	-0.966156	1	1	X.QQVIPGVIFQIGIRN.X	Solyc06g073060.2.1
query:16418;rank:1	-0.966294	1	1	X.KITELREKFKSIKQVLKSHVF.X	Solyc04g049490.2.1
query:2410;rank:1	-0.966294	1	1	X.KMLQTLMEK.X	Solyc11g006310.1.1
query:19737;rank:1	-0.966317	1	1	X.AFEKASKGQEMLSSPWDAAKHMESAATMA.X	Solyc02g069640.2.1
query:7207;rank:1	-0.966359	1	1	X.QKPSHGISKQTHIS.X	Solyc05g055350.2.1
query:9734;rank:1	-0.966416	1	1	X.KRSNPNRNSVRGFEV.X	Solyc02g062510.2.1
query:6602;rank:1	-0.966432	1	1	X.ETVLSDSSRTLVL.X	Solyc10g086530.1.1
query:435;rank:1	-0.966515	1	1	X.SPMGIASV.X	Solyc09g011300.2.1
query:19279;rank:1	-0.966549	1	1	X.SHRDVDSFSAPMDGKPLVMYSLTY.X	Solyc07g025240.1.1
query:1592;rank:1	-0.966708	1	1	X.LTELDFKP.X	Solyc05g024300.1.1
query:17079;rank:1	-0.966708	1	1	X.ASETSSISQSSMNLPSSTTY.X	Solyc05g051830.2.1
query:10733;rank:1	-0.966708	1	1	X.KLMLLAKRVEKKTSVW.X	Solyc10g079040.1.1
query:21204;rank:1	-0.966713	1	1	X.LDVRAWTTVLHAYSRIGKYDKAIALFEYVK.X	Solyc07g017760.1.1
query:14275;rank:1	-0.966812	1	1	X.VLRKEVEVGNVVAVNKSVSAN.X	Solyc03g119220.2.1
query:20300;rank:1	-0.966846	1	1	X.MTLLMMMMMTMMTMMMTTTTT.X	Solyc00g006050.1.1
query:15792;rank:1	-0.966846	1	1	X.GAGAVIRADDGSMTLRLREGLGV.X	Solyc05g006090.2.1
query:3440;rank:1	-0.966846	1	1	X.LSDIVGSALCVT.X	Solyc05g041110.1.1
query:7837;rank:1	-0.966911	1	1	X.PSVRRVVITSSTASVI.X	Solyc01g087640.2.1
query:22341;rank:1	-0.96693	1	1	X.YAQAAAETAGLPAANFKFLHAVSESLPLRDASVDAVIG.X	Solyc06g084030.2.1
query:22017;rank:1	-0.96693	1	1	X.FEGNNVIGNSRMWNKINGKASLSSCDKQSKSFV.X	Solyc01g109780.2.1
query:5881;rank:1	-0.96693	1	1	X.HVLQFFLRLSFV.X	Solyc01g107880.2.1
query:3707;rank:1	-0.966984	1	1	X.KTSLVEHLLEN.X	Solyc03g096640.2.1
query:20760;rank:1	-0.96701	1	1	X.EGMSLLDRLRFLKRDFKFLSIIIELHI.X	Solyc05g012890.1.1
query:17416;rank:1	-0.967026	1	1	X.KVSSTTSSSNQVVTETTCTS.X	Solyc02g077680.2.1
query:2299;rank:1	-0.967109	1	1	X.RLGPVLEHTN.X	Solyc06g060880.2.1
query:4976;rank:1	-0.967121	1	1	X.SPRKARQVLVVF.X	Solyc01g098350.2.1
query:22275;rank:1	-0.967216	1	1	X.ATVGGKEYYYLSVLTRTADGDEGGKHQLITATVNDGK.X	Solyc07g044860.2.1
query:19389;rank:1	-0.967261	1	1	X.NSVSGSLNEESTSGYNSQDSKTGS.X	Solyc06g043030.2.1
query:7002;rank:1	-0.967307	1	1	X.KKKTRSEIKMER.X	Solyc04g073980.2.1
query:3969;rank:1	-0.967312	1	1	X.GLSKSFPNDVTH.X	Solyc05g009010.1.1
query:14798;rank:1	-0.967399	1	1	X.GFVTRTEVATGLFDIYSKCGN.X	Solyc03g058310.1.1
query:17673;rank:1	-0.967406	1	1	X.ASNRSVTIVTSSGSGSSRYT.X	Solyc05g015820.2.1
query:8327;rank:1	-0.967406	1	1	X.VGRGPSPPVGFQVAANY.X	Solyc04g015040.2.1
query:6888;rank:1	-0.967406	1	1	X.AGETETESQTLAE.X	Solyc06g074750.1.1
query:7582;rank:1	-0.967407	1	1	X.SVGSVETSISSHF.X	Solyc05g025740.2.1
query:10946;rank:1	-0.967502	1	1	X.ASFLKPMKPRPKLIKGG.X	Solyc02g087600.2.1
query:18921;rank:1	-0.967505	1	1	X.ASFFSIQLIERGLLSTSLLHLSLLET.X	Solyc02g090130.2.1
query:9314;rank:1	-0.967537	1	1	X.DVQSDFLAQGFGSLGLM.X	Solyc01g005560.2.1
query:6587;rank:1	-0.967537	1	1	X.EVSTGASASGFVM.X	Solyc10g012050.2.1
query:13070;rank:1	-0.967597	1	1	X.TSEFVVKLLQFLVPLIIL.X	Solyc09g061230.2.1
query:646;rank:1	-0.967597	1	1	X.TYGKDTSN.X	Solyc02g037530.2.1
query:16291;rank:1	-0.967605	1	1	X.QKFTALIMNSVVVLSLSASLLAVN.X	Solyc01g088550.2.1
query:14122;rank:1	-0.967605	1	1	X.VTVAISPPRIPVDGFRQRTY.X	Solyc01g090730.2.1
query:18098;rank:1	-0.967675	1	1	X.YFTGTTKDEYGNKEFNGSKTSD.X	Solyc09g082890.1.1
query:9834;rank:1	-0.967675	1	1	X.SRSLTATVHVLIRLKR.X	Solyc02g088140.1.1
query:21720;rank:1	-0.967675	1	1	X.PIKYTEHRNVIRKVTKPSLVKSKKLSEAAKSS.X	Solyc03g007460.1.1
query:6576;rank:1	-0.967675	1	1	X.KKLSVSNADEFLLN.X	Solyc07g063170.1.1
query:18473;rank:1	-0.967693	1	1	X.VSKLTTSDSPSAISFGRSRARGLSFV.X	Solyc02g094170.2.1
query:11387;rank:1	-0.967693	1	1	X.QNPEKTHKNSKKVFF.X	Solyc07g041680.1.1
query:23234;rank:1	-0.967704	1	1	X.TVPTLRFIRRYPTLFEEFPHPKYQSLPCFKLTQIAK.X	Solyc01g105040.2.1
query:21043;rank:1	-0.967803	1	1	X.VKGFHDAHPIDANSILVEDCDVLIPAALGGVIN.X	Solyc10g078550.1.1
query:16963;rank:1	-0.967803	1	1	X.TSSSFLRGIGVMSSTSSSN.X	Solyc02g085580.2.1
query:13843;rank:1	-0.967803	1	1	X.LPETAIRNIGKPLVNVGGKRV.X	Solyc08g078450.2.1
query:7924;rank:1	-0.967883	1	1	X.SVAAFLHNLGINNVVL.X	Solyc02g005410.1.1
query:12568;rank:1	-0.967902	1	1	X.SISEGAKNLVRQMLEADPK.X	Solyc09g005550.2.1
query:13353;rank:1	-0.967951	1	1	X.APGQLTRLRAANVDTEKLAR.X	Solyc05g041920.2.1
query:11098;rank:1	-0.967951	1	1	X.ATFHSITQYAGMSTN.X	Solyc10g081140.1.1
query:3887;rank:1	-0.967951	1	1	X.GNPLYSPVFTSL.X	Solyc02g093160.2.1
query:18042;rank:1	-0.967979	1	1	X.SALLLAILFQDANIVSSPTSMRFIP.X	Solyc11g017460.1.1
query:3006;rank:1	-0.968001	1	1	X.TYGLLVGPFGSI.X	Solyc03g120310.2.1
query:7540;rank:1	-0.9681	1	1	X.LMSLKILQENIQK.X	Solyc10g051040.1.1
query:6497;rank:1	-0.9681	1	1	X.KRAATSLINPGQAS.X	Solyc11g072930.1.1
query:12265;rank:1	-0.968199	1	1	X.TYLQRVGVGLVLSALSMTA.X	Solyc03g005950.1.1
query:2835;rank:1	-0.968199	1	1	X.YTFGLALSNLI.X	Solyc05g006000.2.1
query:11979;rank:1	-0.968265	1	1	X.RTLKLRIRVGSDKTAQK.X	Solyc01g067600.2.1
query:12246;rank:1	-0.96836	1	1	X.PSESSTFGACDDVSPSTM.X	Solyc03g112140.2.1
query:15150;rank:1	-0.968366	1	1	X.NRLPPQTTAQPFFQPLRLN.X	Solyc12g038510.1.1
query:21474;rank:1	-0.968397	1	1	X.GMHGMGMMGSLGSTSPMRPAGISPQQLRPVSS.X	Solyc09g009680.2.1
query:17091;rank:1	-0.968397	1	1	X.LSILLLLPFLSSPSSLSLNLPNTTV.X	Solyc01g021670.2.1
query:12772;rank:1	-0.968496	1	1	X.DKRAPVLLLLPSFACIVRI.X	Solyc02g093890.1.1
query:17510;rank:1	-0.968504	1	1	X.MNSSSSQIDLQTGSSQSLLIK.X	Solyc04g010050.2.1
query:9323;rank:1	-0.968504	1	1	X.GLGLDELMKLEKLVEGG.X	Solyc01g105800.2.1
query:3115;rank:1	-0.968504	1	1	X.KPTTIVASRT.X	Solyc07g006030.2.1
query:6287;rank:1	-0.968504	1	1	X.LMRKLFKAKWVN.X	Solyc00g017880.1.1
query:2390;rank:1	-0.96855	1	1	X.ISVAMKAMPW.X	Solyc02g086180.2.1
query:21574;rank:1	-0.968595	1	1	X.TSKSKGKMPRTRPAALKFHGSFNVVVTGITIQN.X	Solyc07g015870.2.1
query:16249;rank:1	-0.968595	1	1	X.LAQKEQIERNRLAETLDFDIK.X	Solyc04g080600.2.1
query:13682;rank:1	-0.968595	1	1	X.RFMGQVPGIMVDRLLSANI.X	Solyc09g074260.1.1
query:21170;rank:1	-0.968642	1	1	X.LANQAGFNGISFICTFGSWNSTSRSTL.X	Solyc06g060220.1.1
query:14455;rank:1	-0.968642	1	1	X.TSNRSRDSPSLPVSKEGLLD.X	Solyc01g098350.2.1
query:10892;rank:1	-0.968642	1	1	X.SPVGVALVLLLVLFLLYN.X	Solyc12g099500.1.1
query:11292;rank:1	-0.968646	1	1	X.GAPLILHKLLVWSANRN.X	Solyc07g055560.2.1
query:9711;rank:1	-0.968646	1	1	X.SSKLTYKPTTLANLAET.X	Solyc09g089560.2.1
query:2107;rank:1	-0.968694	1	1	X.LIINFIAAVK.X	Solyc01g087730.2.1
query:16779;rank:1	-0.968741	1	1	X.SLIGLVVVQRAIEHHGRASLIVF.X	Solyc03g031530.2.1
query:19963;rank:1	-0.96878	1	1	X.MLFASVVFGLLFWNKGKKLDDQQSVF.X	Solyc01g101070.2.1
query:14853;rank:1	-0.96878	1	1	X.LPRVNKMFLFIKKRTKVMV.X	Solyc07g006480.2.1
query:332;rank:1	-0.96878	1	1	X.REKHKGS.X	Solyc02g070320.2.1
query:15053;rank:1	-0.968793	1	1	X.ILIQNLIQIQYSTYMYIRN.X	Solyc12g035980.1.1
query:8378;rank:1	-0.968793	1	1	X.KAAFSPEYGLFTQT.X	Solyc09g008700.1.1
query:10041;rank:1	-0.968836	1	1	X.LKVIVRTTPEIVEVVGN.X	Solyc06g060100.2.1
query:20329;rank:1	-0.968892	1	1	X.SLSSLVFIVYVTKDVPKISLCVLLTLIVF.X	Solyc07g052330.1.1
query:10677;rank:1	-0.968892	1	1	X.KKHPLALLASELKSIAE.X	Solyc08g080520.2.1
query:6262;rank:1	-0.968892	1	1	X.GSAGLIQLVSTKLLF.X	Solyc10g009570.2.1
query:2750;rank:1	-0.968892	1	1	X.ILMAGSLPALVT.X	Solyc06g034200.1.1
query:11954;rank:1	-0.968918	1	1	X.ISLASSLLLSLTGNGTFN.X	Solyc12g009600.1.1
query:3839;rank:1	-0.968918	1	1	X.QAYASSRST.X	Solyc01g058490.1.1
query:17841;rank:1	-0.968932	1	1	X.KGSTAIFIVKLGIPGRLNESKLPFT.X	Solyc07g056580.2.1
query:6346;rank:1	-0.968932	1	1	X.MEVGKVESQVSGSQ.X	Solyc02g094700.1.1
query:13917;rank:1	-0.968991	1	1	X.YGFLIISAILSIVFISSIK.X	Solyc09g090210.2.1
query:7734;rank:1	-0.968991	1	1	X.GSSSSGTDSGSSSGGE.X	Solyc03g111090.2.1
query:19010;rank:1	-0.969056	1	1	X.MVEAAKSAYQEIMSSGMVPSLLTFN.X	Solyc07g047820.1.1
query:13503;rank:1	-0.969056	1	1	X.QSTAKGYRTIDLFIQTTDG.X	Solyc05g054620.2.1
query:8521;rank:1	-0.969056	1	1	X.VGTKVSAVSRKTNTTT.X	Solyc02g081660.2.1
query:16251;rank:1	-0.969091	1	1	X.ERDLDRELSYEKRERRSGR.X	Solyc11g008730.1.1
query:10241;rank:1	-0.969091	1	1	X.YSSSDSEEVSMNVN.X	Solyc04g007330.1.1
query:14630;rank:1	-0.969122	1	1	X.MQLQMQLAMAQAEILCIQMQ.X	Solyc06g050950.2.1
query:9402;rank:1	-0.969122	1	1	X.KTVVPKRPASASRGRPT.X	Solyc09g014490.2.1
query:13833;rank:1	-0.969195	1	1	X.FICKIAGNTVHDARKAIMLGG.X	Solyc10g078470.1.1
query:16488;rank:1	-0.969218	1	1	X.GRSNPAVRVSMQTIPKPIIFSPR.X	Solyc04g045320.1.1
query:14622;rank:1	-0.969313	1	1	X.TSSETTNKCYLFLLGMN.X	Solyc10g005170.1.1
query:14405;rank:1	-0.969313	1	1	X.LKRVPKGWAMPTDAKPLIIGV.X	Solyc02g077290.1.1
query:2508;rank:1	-0.969313	1	1	X.RLVRKTFDM.X	Solyc05g010670.2.1
query:13025;rank:1	-0.969333	1	1	X.KLEAGLARSRAAILLSRQN.X	Solyc10g083750.1.1
query:17243;rank:1	-0.969333	1	1	X.KAAQSLNGKLEIAGRTIKVSSVTE.X	Solyc11g005170.1.1
query:13541;rank:1	-0.969333	1	1	X.HVKEEGLKLWLELLTAFTA.X	Solyc06g076740.1.1
query:11637;rank:1	-0.969388	1	1	X.SLSGAAIAISLTNVTGFSLL.X	Solyc02g091050.2.1
query:8678;rank:1	-0.969388	1	1	X.LKSLSSKSPIVVLLT.X	Solyc03g112760.2.1
query:9280;rank:1	-0.969471	1	1	X.FPALRVVNLSATGIRAL.X	Solyc08g013970.1.1
query:5684;rank:1	-0.969471	1	1	X.FLVSSFPILGLSSN.X	Solyc06g083750.2.1
query:20644;rank:1	-0.969487	1	1	X.KRTLPIEEELSPPPNPAESKEMATSRSSSN.X	Solyc11g010610.1.1
query:19606;rank:1	-0.969487	1	1	X.RGIKQIVRLKEFLSKWQHVTLGPKGN.X	Solyc05g025920.2.1
query:13034;rank:1	-0.969487	1	1	X.VASPPVATPPPTTSTPPIV.X	Solyc12g057140.1.1
query:5600;rank:1	-0.969487	1	1	X.AISSGITTMVGGG.X	Solyc05g014970.2.1
query:13456;rank:1	-0.969503	1	1	X.TSHGGGSLSRRSSLSLTS.X	Solyc03g019680.2.1
query:19802;rank:1	-0.969586	1	1	X.MLFDKMPSKNLVSWTIMISGYAEKGLI.X	Solyc02g088470.1.1
query:673;rank:1	-0.969586	1	1	X.GMATAVLIN.X	Solyc08g083060.2.1
query:18699;rank:1	-0.969599	1	1	X.IFSSISTSSNSTGNLISSRNPN.X	Solyc03g097060.2.1
query:11092;rank:1	-0.969599	1	1	X.KIIDLATLTGAIMVALGPS.X	Solyc12g010020.1.1
query:8664;rank:1	-0.969599	1	1	X.QAFVGVAPNLNAIVIAF.X	Solyc06g054550.2.1
query:13752;rank:1	-0.969609	1	1	X.TMTMTMTMMTTMMTY.X	Solyc12g032910.1.1
query:3832;rank:1	-0.969609	1	1	X.RVPLMDKINGF.X	Solyc10g008480.2.1
query:12042;rank:1	-0.969685	1	1	X.NQTTPFFRSTSQQN.X	Solyc03g013420.1.1
query:11049;rank:1	-0.969685	1	1	X.LFDEASQKDVVLWNCL.X	Solyc01g010510.2.1
query:3609;rank:1	-0.969685	1	1	X.AGLSVTLLGDVM.X	Solyc11g043010.1.1
query:16826;rank:1	-0.969694	1	1	X.MQIKLVQGNSAGTVTAYYLSSQGSS.X	Solyc07g006870.2.1
query:14032;rank:1	-0.969694	1	1	X.NKLIGKSKRGTRYLKVIFH.X	Solyc07g052970.2.1
query:13747;rank:1	-0.969694	1	1	X.VKTAFLNGELEEEIYIEQP.X	Solyc12g018970.1.1
query:7609;rank:1	-0.969694	1	1	X.LGTMSSLEVLLLSTN.X	Solyc01g007130.2.1
query:17482;rank:1	-0.969784	1	1	X.AAGVSQKDATMAVLVQEMLSPDLS.X	Solyc09g098040.2.1
query:19637;rank:1	-0.969789	1	1	X.MKKLHEDVVMQILLELSVKSLIRFKS.X	Solyc01g056220.2.1
query:1762;rank:1	-0.969789	1	1	X.QRNEALRVA.X	Solyc01g006350.2.1
query:15278;rank:1	-0.969883	1	1	X.LRMPLRKISNFVPPPSPPSPLA.X	Solyc01g098980.2.1
query:3667;rank:1	-0.969883	1	1	X.VQNKSNNFSDK.X	Solyc03g044970.1.1
query:12436;rank:1	-0.969885	1	1	X.SSSSTFNSVTSSVKN.X	Solyc04g005430.2.1
query:20780;rank:1	-0.969982	1	1	X.KNKRGLAILYRSKDFVKWTKAPHPFHSSV.X	Solyc10g085640.1.1
query:13978;rank:1	-0.969982	1	1	X.QAASFMLGNGITQYHPISFVA.X	Solyc11g061700.1.1
query:17722;rank:1	-0.970023	1	1	X.GSSSSSFSSCLPLSSASSSFSST.X	Solyc11g068530.1.1
query:17925;rank:1	-0.970075	1	1	X.ELKLPTIDCLSQLQLSELKAVGKHN.X	Solyc05g012800.1.1
query:5240;rank:1	-0.970075	1	1	X.FSVRSVQLTFVF.X	Solyc10g047270.1.1
query:7301;rank:1	-0.970081	1	1	X.NFTAGIVGLGGSKVSF.X	Solyc08g074920.1.1
query:14663;rank:1	-0.970162	1	1	X.HGEIPRFLPTRLEYLGLYGN.X	Solyc06g033920.1.1
query:2544;rank:1	-0.970171	1	1	X.KKEVCSLLKE.X	Solyc03g121250.2.1
query:3033;rank:1	-0.97018	1	1	X.QPPSSIVRLNN.X	Solyc11g011090.1.1
query:15634;rank:1	-0.970266	1	1	X.GQAPDGIKSLGSSLCMASMSL.X	Solyc01g006440.1.1
query:15788;rank:1	-0.970279	1	1	X.KTRKDLIVATVASSLIGCVIM.X	Solyc06g050250.1.1
query:8154;rank:1	-0.9703	1	1	X.TCSTGPVALLSGLDPN.X	Solyc00g085070.2.1
query:4469;rank:1	-0.970361	1	1	X.PPASDSWVMSN.X	Solyc01g111040.2.1
query:21424;rank:1	-0.970438	1	1	X.ILAFEELFKASGSSWQSSLSHRKTGKSG.X	Solyc02g088480.2.1
query:13806;rank:1	-0.970438	1	1	X.YDECSTSKGKRDSSAGMDN.X	Solyc08g082040.2.1
query:11814;rank:1	-0.970438	1	1	X.KNGSSSSSSSTTTNQ.X	Solyc01g103030.2.1
query:7282;rank:1	-0.970438	1	1	X.QPGEQPMPYYLTN.X	Solyc11g044900.1.1
query:6292;rank:1	-0.970438	1	1	X.QSSSSSSSSNN.X	Solyc02g086290.1.1
query:3634;rank:1	-0.970456	1	1	X.IVDLVLFFGHN.X	Solyc10g007100.2.1
query:19383;rank:1	-0.970478	1	1	X.IQGTIPKELGNLKSLISLDLYNNNISG.X	Solyc10g081190.1.1
query:14171;rank:1	-0.970478	1	1	X.RVQHVVYELSPILAATIVVS.X	Solyc05g013470.2.1
query:7189;rank:1	-0.970552	1	1	X.YLDYDMFAMLSGPA.X	Solyc02g067010.2.1
query:2417;rank:1	-0.970576	1	1	X.MQIFVKTLTG.X	Solyc11g005670.1.1
query:21948;rank:1	-0.970577	1	1	X.GDIIVEGEGKNLSPRIEVITSDATSNLEKSPIS.X	Solyc11g040150.1.1
query:18091;rank:1	-0.970577	1	1	X.QPSSSSASQLMMSSLHIQGNSSE.X	Solyc05g016050.1.1
query:13156;rank:1	-0.970577	1	1	X.RFSSENVLNGLRGLSQGFV.X	Solyc05g051220.2.1
query:14307;rank:1	-0.970676	1	1	X.EEAVALQNIICPSISTRKMV.X	Solyc03g119070.2.1
query:9170;rank:1	-0.970676	1	1	X.LRLSSPISQEMELPGN.X	Solyc12g088740.1.1
query:7587;rank:1	-0.970676	1	1	X.SQVSGTVGKESKPI.X	Solyc06g073550.2.1
query:21751;rank:1	-0.970714	1	1	X.KKESVIEKSLDKLKETSTDVWQGTQLLAIDVAAA.X	Solyc09g010280.2.1
query:6418;rank:1	-0.970714	1	1	X.AYKASSPKHGSSLR.X	Solyc02g032550.1.1
query:22068;rank:1	-0.970742	1	1	X.SSLENIFGGSRPQHFENAPNFNSSHGLPMSIKT.X	Solyc11g020020.1.1
query:10532;rank:1	-0.970775	1	1	X.PSPGTLQSLAPNMSPAPGP.X	Solyc05g056210.2.1
query:3380;rank:1	-0.970775	1	1	X.SRIREQPISS.X	Solyc01g103180.2.1
query:16425;rank:1	-0.970838	1	1	X.GSKVAMACILSKLVKLNGMRSKN.X	Solyc03g124060.2.1
query:9113;rank:1	-0.970838	1	1	X.RGVKRILGHPSGRSIF.X	Solyc11g044330.1.1
query:19944;rank:1	-0.970852	1	1	X.HAKVGRLSQESSVCSMAGRSPLEHASRVL.X	Solyc10g084760.1.1
query:15114;rank:1	-0.970852	1	1	X.STLILLPRIWDLVKLRVLFV.X	Solyc06g008770.1.1
query:7790;rank:1	-0.970852	1	1	X.KKKPNTSVIPAVEV.X	Solyc06g050820.1.1
query:16875;rank:1	-0.970933	1	1	X.AVKDDDKLEISYNVPVVDASVRAN.X	Solyc03g005850.2.1
query:12541;rank:1	-0.970933	1	1	X.DTLSQLTNLLTMSIMNN.X	Solyc08g069170.1.1
query:20220;rank:1	-0.970973	1	1	X.DVNMKVNAMKVREQAWKAKAIGGSSEKRL.X	Solyc02g088500.1.1
query:15340;rank:1	-0.970973	1	1	X.RSGSWGFSSAPPYWSSFL.X	Solyc04g018170.1.1
query:16872;rank:1	-0.97099	1	1	X.STTSPTSGNSIRTTTTTSAAGG.X	Solyc06g068460.2.1
query:8172;rank:1	-0.97099	1	1	X.SHAAGIAMITKRILK.X	Solyc01g007050.1.1
query:19996;rank:1	-0.971028	1	1	X.SSSGGIKGSNFSRFFDSDSEDDDNDN.X	Solyc01g009920.1.1
query:21800;rank:1	-0.971072	1	1	X.MSTPPHIVPEWYVLPIHAILRSIPDKSGGVAAIAP.X	Solyc09g050020.1.1
query:5760;rank:1	-0.971072	1	1	X.DTNISANNSMFV.X	Solyc01g009170.2.1
query:15111;rank:1	-0.971129	1	1	X.TSSSSSSSSSSELIVMEN.X	Solyc06g009480.1.1
query:7084;rank:1	-0.971129	1	1	X.KSSTSSSTSTS.X	Solyc11g045690.1.1
query:4280;rank:1	-0.971171	1	1	X.KRSEVLSIRKN.X	Solyc07g066200.2.1
query:7975;rank:1	-0.971267	1	1	X.ITNRPKHTGMSVTEV.X	Solyc02g021340.2.1
query:14781;rank:1	-0.97127	1	1	X.MDISRKRDTYGITNINSGDQG.X	Solyc04g009690.1.1
query:13950;rank:1	-0.97127	1	1	X.LLNTKYKERLLMGYKGLI.X	Solyc02g087710.2.1
query:13205;rank:1	-0.971314	1	1	X.NIENSHAATAQGRSQLAKAAK.X	Solyc06g062360.2.1
query:10407;rank:1	-0.971314	1	1	X.TYMVVFRQYFASLLY.X	Solyc04g025260.2.1
query:22146;rank:1	-0.971369	1	1	X.TEMCKKILATGIKTLHLYTLNMEKSALAILMNLG.X	Solyc11g008870.1.1
query:10753;rank:1	-0.971369	1	1	X.LSSPPLPSSSNHSILSTPL.X	Solyc08g067840.2.1
query:9111;rank:1	-0.971369	1	1	X.QKDKPKGIFLKNIHN.X	Solyc12g013940.1.1
query:3472;rank:1	-0.971369	1	1	X.KPFEEVNKVGL.X	Solyc11g011460.1.1
query:15022;rank:1	-0.971405	1	1	X.LELMKKTWVILGVNKSLHN.X	Solyc09g090480.2.1
query:5046;rank:1	-0.971405	1	1	X.KDPSLTNLFLMN.X	Solyc11g006620.1.1
query:18038;rank:1	-0.97141	1	1	X.LEQMIKQKPFLDSSLYSSETSL.X	Solyc12g013960.1.1
query:19480;rank:1	-0.971468	1	1	X.QLYVAVGVVLSTLILLLIIRLFKGTASN.X	Solyc03g112450.2.1
query:11415;rank:1	-0.971543	1	1	X.AKKLDILVKDKNGELYM.X	Solyc03g094020.2.1
query:9309;rank:1	-0.971543	1	1	X.GTGTTTTTTPTTT.X	Solyc01g109920.2.1
query:8236;rank:1	-0.971543	1	1	X.SLSMDSLLVGKTRK.X	Solyc11g008740.1.1
query:1863;rank:1	-0.971543	1	1	X.QSTKLSISQ.X	Solyc10g005620.2.1
query:14384;rank:1	-0.971681	1	1	X.AQNLRDSLAEANSDIVVKIGL.X	Solyc12g010840.1.1
query:14235;rank:1	-0.971765	1	1	X.KPKEALSVFNELQLIKKAEP.X	Solyc06g076900.2.1
query:7228;rank:1	-0.971765	1	1	X.RLLLSDDNLRMAVN.X	Solyc11g020590.1.1
query:3220;rank:1	-0.971765	1	1	X.STLGKSDDIIN.X	Solyc07g063240.2.1
query:18086;rank:1	-0.971791	1	1	X.MASTLLASTAIMLSSLIGVLMSS.X	Solyc03g079980.1.1
query:7770;rank:1	-0.971791	1	1	X.RPALASVIVEALKVDS.X	Solyc02g079040.2.1
query:7821;rank:1	-0.971819	1	1	X.PITSKTQPKTKSD.X	Solyc01g094420.2.1
query:5666;rank:1	-0.971819	1	1	X.TIASGTSTSASP.X	Solyc06g076030.2.1
query:15692;rank:1	-0.971864	1	1	X.LYTSYSDGLHFAKPISTLRTN.X	Solyc04g079390.2.1
query:14280;rank:1	-0.971864	1	1	X.SQLGVRNNAKILASRVSVDQG.X	Solyc07g007370.2.1
query:20585;rank:1	-0.971957	1	1	X.LEVIFSICLVLSGLMLFTLLIGNIQVFLH.X	Solyc02g088560.2.1
query:12463;rank:1	-0.971964	1	1	X.GSKRMPGTAITKSVVANEPG.X	Solyc04g076230.2.1
query:16806;rank:1	-0.971981	1	1	X.SLLKMDGKLITIGLPEKPLELPI.X	Solyc03g078440.2.1
query:19455;rank:1	-0.972077	1	1	X.TVTSINPERMRAEKVIQTRSVATAN.X	Solyc10g044810.1.1
query:2584;rank:1	-0.972077	1	1	X.VQVVSSKLLK.X	Solyc10g011650.2.1
query:973;rank:1	-0.972077	1	1	X.KGLAPSKAS.X	Solyc03g093150.1.1
query:1499;rank:1	-0.972162	1	1	X.GLKPQPFSA.X	Solyc08g006930.2.1
query:3885;rank:1	-0.972172	1	1	X.KPTKGSSVAIF.X	Solyc06g059740.2.1
query:7078;rank:1	-0.972234	1	1	X.NEGYAIGLTSVLIIVG.X	Solyc09g065120.2.1
query:5787;rank:1	-0.972234	1	1	X.CSSCDDCPRTS.X	Solyc09g008600.2.1
query:21027;rank:1	-0.972261	1	1	X.KRSSSSRRREHSRKGLQILFEDERHR.X	Solyc07g022860.2.1
query:20823;rank:1	-0.972261	1	1	X.RLSKMKKNTKALKLKLTVDDKNVSQFTN.X	Solyc07g063050.1.1
query:18481;rank:1	-0.972261	1	1	X.LARKVSLIRAVAYIIAQSLGAICGVGFV.X	Solyc10g055630.1.1
query:6383;rank:1	-0.972261	1	1	X.PGATPSASSPFPGA.X	Solyc12g009390.1.1
query:5382;rank:1	-0.972261	1	1	X.VETVRMDKSLW.X	Solyc03g123620.2.1
query:9321;rank:1	-0.972267	1	1	X.GRITGQKYLLMSKLL.X	Solyc01g065620.1.1
query:21360;rank:1	-0.97236	1	1	X.LCATKMALETALSRQEELLAYIEKKKKKKN.X	Solyc11g040280.1.1
query:9479;rank:1	-0.97236	1	1	X.QKKRGYLLPRPKMAN.X	Solyc10g084350.1.1
query:3274;rank:1	-0.97236	1	1	X.TYTSSTVS.X	Solyc07g049750.2.1
query:3201;rank:1	-0.97236	1	1	X.KDIMIFNVFV.X	Solyc09g082880.1.1
query:10372;rank:1	-0.972363	1	1	X.LETARVDQVVAVVKSCT.X	Solyc03g118700.2.1
query:164;rank:1	-0.972372	1	1	X.LSKMGPGN.X	Solyc02g014030.1.1
query:17507;rank:1	-0.972458	1	1	X.NMTSTLNSSAFQDNSMSEPNL.X	Solyc11g071230.1.1
query:8176;rank:1	-0.972458	1	1	X.PIEHMKITVIESVN.X	Solyc01g079380.1.1
query:21269;rank:1	-0.972459	1	1	X.MTNLSSSKISSSKNRHASTLKDQKTPK.X	Solyc11g032070.1.1
query:10662;rank:1	-0.972459	1	1	X.SRRSVGTSMLSDSK.X	Solyc12g098630.1.1
query:22922;rank:1	-0.97251	1	1	X.PSSFDLVEKMHYLFVRVVKARSLPTVGCPVVKMVVSG.X	Solyc01g065500.2.1
query:10301;rank:1	-0.97251	1	1	X.FLRTVERAQADWIRQ.X	Solyc01g103690.2.1
query:4227;rank:1	-0.97251	1	1	X.NLVNYGFLIISA.X	Solyc09g090210.2.1
query:197;rank:1	-0.97251	1	1	X.SQVPIGNN.X	Solyc12g056510.1.1
query:12699;rank:1	-0.972553	1	1	X.KNRSLLSTLEGVVSLRPY.X	Solyc07g052390.2.1
query:10007;rank:1	-0.972553	1	1	X.KVQTVSIPYTQLKDKN.X	Solyc04g049580.2.1
query:9900;rank:1	-0.972553	1	1	X.TKARSYNEQMCNSF.X	Solyc03g119830.2.1
query:2010;rank:1	-0.972553	1	1	X.SSSKAAGKKVK.X	Solyc03g083390.2.1
query:4448;rank:1	-0.972648	1	1	X.AMAATVLKNLAVF.X	Solyc03g097740.1.1
query:20156;rank:1	-0.972648	1	1	X.RDFKGGKFRLCQTIKDDPLNLFRLASK.X	Solyc02g069320.1.1
query:19527;rank:1	-0.972648	1	1	X.KVVFISTPALGNIVPIIEFAKVFTQKNK.X	Solyc02g081690.1.1
query:12325;rank:1	-0.972648	1	1	X.VKVVETAMALQEAGCFSVV.X	Solyc09g007130.2.1
query:17107;rank:1	-0.972648	1	1	X.PINRPVVQELASELRIGRVVLKR.X	Solyc04g072260.1.1
query:16759;rank:1	-0.972657	1	1	X.KRMLSSGGMPSSHSATVTS.X	Solyc10g006140.2.1
query:4721;rank:1	-0.972744	1	1	X.IPGTFPKGPLVNH.X	Solyc02g088510.2.1
query:20920;rank:1	-0.972756	1	1	X.MSNLSSSSISSSSTAKVLCQCGIVVEMK.X	Solyc03g122220.1.1
query:9177;rank:1	-0.972786	1	1	X.GGKVILGDRPVQVTLR.X	Solyc12g005780.1.1
query:20964;rank:1	-0.972924	1	1	X.KLEELSEICLHDLVGTNLVVVSKTRSNGKMK.X	Solyc05g009760.1.1
query:16672;rank:1	-0.972924	1	1	X.SSAPVVLPPLIVISALGFASSVPFG.X	Solyc04g051280.2.1
query:7630;rank:1	-0.972924	1	1	X.DIRILICTNIVESGL.X	Solyc02g094590.2.1
query:981;rank:1	-0.972934	1	1	X.RKEIDGPE.X	Solyc09g084470.2.1
query:13102;rank:1	-0.972954	1	1	X.KKVGGQLSLGNVVEKVQTKGS.X	Solyc09g083110.1.1
query:7353;rank:1	-0.97303	1	1	X.SRVVVLFVAGTSRVF.X	Solyc12g100360.1.1
query:22501;rank:1	-0.973063	1	1	X.ESKKITRKLHIKARATISSCGALFTPPLLLSSGLQN.X	Solyc09g072610.2.1
query:22391;rank:1	-0.973063	1	1	X.ENLEIHRFIKQLKIVQKKMRFLRYLYVIEIN.X	Solyc09g098100.2.1
query:16555;rank:1	-0.973063	1	1	X.YETRIAYYSWRGAQGYRFTAI.X	Solyc07g065740.2.1
query:13564;rank:1	-0.973125	1	1	X.YRTVKRLGIPDERIILML.X	Solyc10g007850.2.1
query:10281;rank:1	-0.973125	1	1	X.AHSSCVEGSMSSCEG.X	Solyc03g025970.2.1
query:20112;rank:1	-0.973152	1	1	X.RSSSSSWSSESSYNMSDLQYGAELP.X	Solyc08g078120.1.1
query:12197;rank:1	-0.973201	1	1	X.IKTTTSNIPNEILMRV.X	Solyc04g054380.1.1
query:11777;rank:1	-0.973201	1	1	X.PIKTDASSGDTGSFQDDQ.X	Solyc06g083420.1.1
query:20510;rank:1	-0.97322	1	1	X.RSMLIGIVAIVFNIIMYTSPLTVMKKVI.X	Solyc06g071400.2.1
query:9658;rank:1	-0.973251	1	1	X.KTLFILVATFMLDRS.X	Solyc01g109460.2.1
query:14678;rank:1	-0.973316	1	1	X.PKVLLPLVNAPMIDYTLAWL.X	Solyc01g098180.2.1
query:8659;rank:1	-0.973339	1	1	X.HPVSPKNDKGDILLPN.X	Solyc01g080780.2.1
query:8395;rank:1	-0.973339	1	1	X.KMRMLAKEGGVKVIAG.X	Solyc01g112200.2.1
query:7064;rank:1	-0.973339	1	1	X.LTSLFLLLSLLSIAN.X	Solyc12g014420.1.1
query:5425;rank:1	-0.973339	1	1	X.KLMLLKMSLQLN.X	Solyc10g050850.1.1
query:14216;rank:1	-0.973351	1	1	X.LPLVESINGGHMTQKLISVM.X	Solyc06g060960.1.1
query:19890;rank:1	-0.97345	1	1	X.GVIKDLLKLCKTPHERRKSCKCVKKAAN.X	Solyc10g075150.1.1
query:7270;rank:1	-0.97345	1	1	X.KPTRLVLNGLKKKG.X	Solyc01g009670.2.1
query:5522;rank:1	-0.97345	1	1	X.FTFNLSSSPSLT.X	Solyc01g097910.2.1
query:2498;rank:1	-0.97345	1	1	X.GIKLSPNMPI.X	Solyc02g088750.1.1
query:15575;rank:1	-0.973477	1	1	X.LQKKKNALFVLIMTLLLTTKN.X	Solyc02g061880.1.1
query:15376;rank:1	-0.973477	1	1	X.KEKASGGKICGNMTSGGTESIL.X	Solyc05g015860.2.1
query:6874;rank:1	-0.973477	1	1	X.IRTFVIDLSQSVPE.X	Solyc06g068860.2.1
query:19605;rank:1	-0.973506	1	1	X.PELIRTLLKMAPTNDEELKLRLFAGDI.X	Solyc07g052730.2.1
query:20461;rank:1	-0.973549	1	1	X.LFNQRQKVIINITFNNLTKELMATKKL.X	Solyc10g047500.1.1
query:19842;rank:1	-0.973549	1	1	X.MLLEPIFPFDEQKGPYYPWHFFSPGN.X	Solyc09g064800.1.1
query:13798;rank:1	-0.973549	1	1	X.KPGCQTKYGSLTVPYPFGIGL.X	Solyc05g017780.1.1
query:9074;rank:1	-0.973601	1	1	X.PSTYVVLDKIYASQN.X	Solyc02g011680.2.1
query:20472;rank:1	-0.973615	1	1	X.LIDTTAQLLCDKMMPCITQSLALSNQSEG.X	Solyc11g011080.1.1
query:16429;rank:1	-0.973615	1	1	X.KYTRVGDIMTEQSKLITVTSD.X	Solyc04g080510.2.1
query:12583;rank:1	-0.973648	1	1	X.EKLYTGSIIGAVIVIIGLY.X	Solyc09g089860.2.1
query:15927;rank:1	-0.973697	1	1	X.KYEESSGSAYTVASHNISSA.X	Solyc05g055800.2.1
query:11542;rank:1	-0.973697	1	1	X.PTYASPPPPSPSPPPPTY.X	Solyc01g097720.1.1
query:6250;rank:1	-0.973697	1	1	X.RHGLLQILHEESN.X	Solyc03g117470.2.1
query:4968;rank:1	-0.973697	1	1	X.FRHVLIGNTVPF.X	Solyc03g111320.1.1
query:19738;rank:1	-0.973753	1	1	X.RNTPLTTENARRVMEAMRRISFGGVAP.X	Solyc03g098130.2.1
query:7919;rank:1	-0.973753	1	1	X.GGGGIVVVGVIVIVVGGGGGG.X	Solyc01g034180.1.1
query:7033;rank:1	-0.973753	1	1	X.TVVTIVKKVLCFEH.X	Solyc09g018640.1.1
query:4198;rank:1	-0.973753	1	1	X.STLHLVLRLRGG.X	Solyc11g005670.1.1
query:10257;rank:1	-0.973792	1	1	X.KRELDGVTSIKREALGGG.X	Solyc11g065650.1.1
query:21501;rank:1	-0.973887	1	1	X.KESSISTTISPSTQAAIDALIKDLGKDPTNARPL.X	Solyc03g044400.1.1
query:16261;rank:1	-0.973887	1	1	X.YILYTLSTFTLILLDLATSVRGG.X	Solyc02g079310.1.1
query:4826;rank:1	-0.973891	1	1	X.LLIIIIIFSILN.X	Solyc09g091920.2.1
query:16277;rank:1	-0.973945	1	1	X.RNTSGLLLLLGLDFFAMIFPVV.X	Solyc00g021630.1.1
query:17891;rank:1	-0.973983	1	1	X.INSIVVVASVAIVVVLLLLLILLLL.X	Solyc12g062990.1.1
query:16423;rank:1	-0.97403	1	1	X.LLWSVMEHHPKDIMLTCIYA.X	Solyc01g099310.2.1
query:8497;rank:1	-0.97403	1	1	X.DSSSLDGRMAVISTN.X	Solyc12g096580.1.1
query:19004;rank:1	-0.974044	1	1	X.VGFLYKLKVLDVSNNKLAGTIPYTISG.X	Solyc07g053840.1.1
query:18561;rank:1	-0.974044	1	1	X.LLAFLFLLTEGAPQSALVTQLPGFN.X	Solyc06g083050.2.1
query:15820;rank:1	-0.974044	1	1	X.MDMAKRITVDAKIDYPAACNAM.X	Solyc08g043170.2.1
query:6129;rank:1	-0.974044	1	1	X.WSLKLETIFKEG.X	Solyc07g052000.1.1
query:9973;rank:1	-0.974078	1	1	X.TKIERFREPLLESKGG.X	Solyc08g077610.1.1
query:9632;rank:1	-0.974143	1	1	X.VTAVRIIWDGKETW.X	Solyc01g056440.1.1
query:2581;rank:1	-0.974143	1	1	X.DHGLSSAISTI.X	Solyc01g109080.2.1
query:23615;rank:1	-0.974168	1	1	X.RNKVLEILSHVNKRVKHQNDIGLPLSDLWQLYMESSASS.X	Solyc11g062320.1.1
query:17846;rank:1	-0.974168	1	1	X.SSASGVQLSRDKERLDMSSIGK.X	Solyc03g119870.2.1
query:14293;rank:1	-0.974168	1	1	X.ILVLHSLYLFVCSLYGFQV.X	Solyc12g036730.1.1
query:7825;rank:1	-0.974242	1	1	X.NLNVSVNNLNVSGNVN.X	Solyc03g058570.1.1
query:23616;rank:1	-0.974269	1	1	X.IGDVRKAGKLPRMGTIMTCSFCKGPNHNKRNCPKNSKLSLHQ.X	Solyc12g015960.1.1
query:7076;rank:1	-0.974269	1	1	X.SEKGRISNVIAKLMG.X	Solyc04g080270.2.1
query:1939;rank:1	-0.974269	1	1	X.KLSVLRFCN.X	Solyc10g080630.1.1
query:12140;rank:1	-0.974306	1	1	X.AGFYQLLPPMDKYRLHT.X	Solyc04g072190.2.1
query:7471;rank:1	-0.974306	1	1	X.KVVLGNGIPVAVRRLG.X	Solyc05g015150.2.1
query:19490;rank:1	-0.974341	1	1	X.NSSGVNAFSFGNTSTSGSFGFGTQV.X	Solyc12g009390.1.1
query:4159;rank:1	-0.974341	1	1	X.MTLLTTNDPSK.X	Solyc03g082860.2.1
query:23112;rank:1	-0.974364	1	1	X.GGVHFDLVKRVLRDIQRAGQEPSEIIHQISETVYPMY.X	Solyc05g010340.2.1
query:10708;rank:1	-0.974364	1	1	X.SVSNTSDQITEYEH.X	Solyc06g074480.2.1
query:4847;rank:1	-0.974364	1	1	X.RSKVLLGNGRTVS.X	Solyc01g091930.2.1
query:16881;rank:1	-0.97444	1	1	X.PAASMSTFDIMSVAVFIFLYRR.X	Solyc08g077170.2.1
query:8032;rank:1	-0.97444	1	1	X.RKITSMAIASRVTKL.X	Solyc10g005580.2.1
query:7252;rank:1	-0.97444	1	1	X.KLGFNDPIARGIATAS.X	Solyc08g076290.2.1
query:14151;rank:1	-0.974444	1	1	X.LPLFPITTTDDLKDQTTSST.X	Solyc11g072790.1.1
query:11073;rank:1	-0.974444	1	1	X.KDTFNNSTMGNMMAI.X	Solyc08g060940.1.1
query:3387;rank:1	-0.974444	1	1	X.KQKQNQAATGV.X	Solyc10g049300.1.1
query:1482;rank:1	-0.974444	1	1	X.MTTSGNAT.X	Solyc03g063130.1.1
query:16345;rank:1	-0.974459	1	1	X.GGPSFSRGMFGEDIFTSFRN.X	Solyc09g005350.2.1
query:15517;rank:1	-0.974459	1	1	X.MKTCRQILGKIMKKKYGRVF.X	Solyc02g091660.2.1
query:1791;rank:1	-0.974459	1	1	X.LAVLKTLPK.X	Solyc09g018220.1.1
query:13676;rank:1	-0.974554	1	1	X.LMIPPIVIGMVNIIAVVVAFS.X	Solyc01g067520.2.1
query:4464;rank:1	-0.974554	1	1	X.ISSFNSSTYAN.X	Solyc05g023900.1.1
query:2898;rank:1	-0.974554	1	1	X.NAKNAILSGGSAGG.X	Solyc08g005790.2.1
query:12832;rank:1	-0.974582	1	1	X.RQLIDSGITSTDTLKGVVF.X	Solyc07g005780.1.1
query:6846;rank:1	-0.974582	1	1	X.TFVSASTLDGAGR.X	Solyc08g061600.1.1
query:18624;rank:1	-0.974638	1	1	X.RVLCYNKDGRRCIAESKDVIKNLCN.X	Solyc04g078170.1.1
query:20960;rank:1	-0.97465	1	1	X.DLVSAVKVPIDAHSGLVRSQKRYKSCAVVGN.X	Solyc06g074370.1.1
query:12291;rank:1	-0.97465	1	1	X.SYCSTIFSLSSGGSLS.X	Solyc04g078410.2.1
query:5086;rank:1	-0.97472	1	1	X.LMGRSTATRRW.X	Solyc11g006300.1.1
query:18508;rank:1	-0.974737	1	1	X.QRGSAGASSSSSSNQNRSSTSIP.X	Solyc11g068660.1.1
query:9277;rank:1	-0.974737	1	1	X.THPLPPNIVVKLLKDN.X	Solyc08g074390.2.1
query:13399;rank:1	-0.974837	1	1	X.QGSGGYPVRPIQSSLQTVVGGP.X	Solyc01g028970.1.1
query:10073;rank:1	-0.97484	1	1	X.ASKRKALLLTTGIIVAGGT.X	Solyc04g055120.2.1
query:14247;rank:1	-0.974858	1	1	X.FGLNLPTNGSTSLFGNSGSSLVN.X	Solyc03g120280.1.1
query:11250;rank:1	-0.974936	1	1	X.PARPTGGAAAIAMLIGPDAPI.X	Solyc12g056450.1.1
query:4834;rank:1	-0.974936	1	1	X.LKDRAKDIIISGG.X	Solyc06g008920.2.1
query:3521;rank:1	-0.974936	1	1	X.VKKSLVIPSTI.X	Solyc10g086570.2.1
query:23544;rank:1	-0.974997	1	1	X.QRSDAVVPKITVIPVPATCSMDISPSHSDGSLVSMDESMSNSDT.X	Solyc11g005090.1.1
query:13194;rank:1	-0.974997	1	1	X.QGTTPSSSGVSTHSSAN.X	Solyc07g052600.2.1
query:1113;rank:1	-0.974997	1	1	X.FPSGPLTMN.X	Solyc09g064840.2.1
query:4763;rank:1	-0.975031	1	1	X.KGSTGSAASTN.X	Solyc03g117110.2.1
query:13255;rank:1	-0.975035	1	1	X.GLPLATRTLSVMLGSLLNSF.X	Solyc02g090300.2.1
query:19035;rank:1	-0.975126	1	1	X.TATFVPSLETLLKLSQEIGLQIDEL.X	Solyc05g008520.2.1
query:18519;rank:1	-0.975134	1	1	X.QGMASMAKLLVVLLMFLTILSMLCR.X	Solyc05g026380.1.1
query:14617;rank:1	-0.975134	1	1	X.KQTSSSSLRYDTALWN.X	Solyc06g051060.2.1
query:11599;rank:1	-0.975233	1	1	X.LGQSMEKAVKANYDALWA.X	Solyc10g005920.2.1
query:19385;rank:1	-0.975273	1	1	X.PQTTEYKILQQVCRHLIDFYPILAAN.X	Solyc04g008140.1.1
query:2144;rank:1	-0.975273	1	1	X.RSTKLLVLP.X	Solyc03g044540.1.1
query:1988;rank:1	-0.975273	1	1	X.LGDPTTKRQA.X	Solyc12g035280.1.1
query:23682;rank:1	-0.975273	1	1	X.IVNGAPNEILLVLDGTTGLNMLPQAREFNEVVGITGLILTKLDGS.X	Solyc01g091580.2.1
query:4052;rank:1	-0.975273	1	1	X.VIKLPCDNKLS.X	Solyc07g043170.2.1
query:10341;rank:1	-0.975317	1	1	X.HFTTLCFVNVRVSNGSL.X	Solyc08g075530.2.1
query:149;rank:1	-0.975317	1	1	X.QPLMVVD.X	Solyc11g020310.1.1
query:2466;rank:1	-0.975332	1	1	X.QYNCSMAAQF.X	Solyc11g062440.1.1
query:12254;rank:1	-0.975411	1	1	X.QRIPTDALGTAVIAKNGLVG.X	Solyc00g028520.1.1
query:10768;rank:1	-0.975412	1	1	X.ATKLRWLPSHNLLMSA.X	Solyc08g008070.1.1
query:23535;rank:1	-0.975507	1	1	X.FQSHSTCPLCRNPISDTQSTNSGAISVASTETPNLPTN.X	Solyc03g123680.1.1
query:23192;rank:1	-0.975507	1	1	X.SFRSMATGTSSSSSLPADEEEEEILMLYGSESGWV.X	Solyc10g049650.1.1
query:22131;rank:1	-0.975507	1	1	X.TGKFLRMYYKVSIPISKTMKAKESENREKPSQ.X	Solyc11g011580.1.1
query:14137;rank:1	-0.975507	1	1	X.KRCLGTRKLVSRDFVTAKD.X	Solyc12g009040.1.1
query:13096;rank:1	-0.975507	1	1	X.LGVIGRRSVADLGAIGDSLSVT.X	Solyc12g019860.1.1
query:14850;rank:1	-0.97553	1	1	X.LQSLSLVLDVISDSLLRTVVN.X	Solyc07g066240.2.1
query:8905;rank:1	-0.97553	1	1	X.LIKLVSQKKGTPLKPN.X	Solyc12g055840.1.1
query:19184;rank:1	-0.975549	1	1	X.QKYCEKHMHRGRQRSRKCMELTN.X	Solyc08g079800.2.1
query:17309;rank:1	-0.975549	1	1	X.KKRKSTLVNRKAGLVKKISELSI.X	Solyc11g020320.1.1
query:11440;rank:1	-0.975549	1	1	X.QVERVIADRISKDGYGN.X	Solyc12g099910.1.1
query:10741;rank:1	-0.975549	1	1	X.RRARTVILQRIIKPPN.X	Solyc01g109380.2.1
query:8145;rank:1	-0.975549	1	1	X.RFITSCSTAERN.X	Solyc06g082490.2.1
query:7080;rank:1	-0.975549	1	1	X.VVMLVSLLMLSAPVM.X	Solyc03g119990.2.1
query:3590;rank:1	-0.975549	1	1	X.RTLLSIKKYM.X	Solyc01g080780.2.1
query:2575;rank:1	-0.975549	1	1	X.KMVPGKSAKDC.X	Solyc01g068540.2.1
query:2528;rank:1	-0.975549	1	1	X.KRFTGSAEEM.X	Solyc09g059240.2.1
query:97;rank:1	-0.975549	1	1	X.HMALIPN.X	Solyc06g051090.1.1
query:21440;rank:1	-0.975603	1	1	X.RTALCAALGGRMEVSAMSTISGVKSTYLLAVAYL.X	Solyc11g043130.1.1
query:15883;rank:1	-0.975603	1	1	X.MTMMMMTMSMMMTTTMI.X	Solyc07g026760.1.1
query:3377;rank:1	-0.975603	1	1	X.NGKLSAGVANKN.X	Solyc09g055500.1.1
query:17216;rank:1	-0.975629	1	1	X.LTKSIWLLHRLAYSFDPPVRVF.X	Solyc01g091120.2.1
query:16845;rank:1	-0.975629	1	1	X.PSVLPAALSSLLPSNPVSVLHSSNGS.X	Solyc01g094620.2.1
query:15167;rank:1	-0.975629	1	1	X.TFGWKILSTASSPLQKGLSTYN.X	Solyc06g083670.2.1
query:18443;rank:1	-0.975687	1	1	X.LSRKLPISSSKINPYRILIILRLT.X	Solyc11g005560.1.1
query:16798;rank:1	-0.975687	1	1	X.SLISAENGTSAKETRVDKLELKE.X	Solyc03g007140.2.1
query:19960;rank:1	-0.975698	1	1	X.VASLDSSVPVEVAPLDSSMPVNVAPLASSV.X	Solyc08g005030.1.1
query:7563;rank:1	-0.975698	1	1	X.ARVMAELILVELLAN.X	Solyc00g033890.1.1
query:6796;rank:1	-0.975793	1	1	X.SSLKIVHRDIKTSN.X	Solyc07g055810.2.1
query:7376;rank:1	-0.975825	1	1	X.DAGSSLDSLVSSFN.X	Solyc05g050900.2.1
query:15983;rank:1	-0.975827	1	1	X.EGHLSQNACMSAFIEILQDSK.X	Solyc01g098870.2.1
query:22833;rank:1	-0.975926	1	1	X.HSSFIILDSFPPSQAFFNRSLDPVMVPLLKFLQDT.X	Solyc04g007910.2.1
query:12582;rank:1	-0.975964	1	1	X.SIPALNFPVTAIIPTAKIR.X	Solyc02g085680.1.1
query:2291;rank:1	-0.975964	1	1	X.TMPELVTVVF.X	Solyc09g061510.1.1
query:16231;rank:1	-0.975984	1	1	X.SSALGFLLAQKHFTNPLVAVPSA.X	Solyc05g017950.2.1
query:8256;rank:1	-0.975984	1	1	X.AHLKKVNSLLEMKAN.X	Solyc11g011080.1.1
query:5998;rank:1	-0.976025	1	1	X.VPAFVTMVLMPLT.X	Solyc03g111400.1.1
query:2436;rank:1	-0.976025	1	1	X.PHHSIDPVLAA.X	Solyc10g079640.1.1
query:1593;rank:1	-0.976025	1	1	X.KNDFLTPK.X	Solyc05g054500.1.1
query:7678;rank:1	-0.976102	1	1	X.RNLKIGVPAAIMTFGG.X	Solyc01g108150.2.1
query:1826;rank:1	-0.976102	1	1	X.SGKIAHAGLDV.X	Solyc00g025510.1.1
query:796;rank:1	-0.976124	1	1	X.IAKVQHTN.X	Solyc08g076050.2.1
query:5461;rank:1	-0.976175	1	1	X.SAIDDGVDIISMSL.X	Solyc08g079920.1.1
query:12137;rank:1	-0.976223	1	1	X.LSAFTIAAIIGSIFLYTGQ.X	Solyc03g117280.2.1
query:6596;rank:1	-0.976223	1	1	X.ILQAVIASVVEIED.X	Solyc05g050630.2.1
query:5641;rank:1	-0.976223	1	1	X.EVVMMSRVKHEN.X	Solyc09g018060.2.1
query:20603;rank:1	-0.97624	1	1	X.TAMANFMPSLALMDNKDILMGMTALGILVIT.X	Solyc06g060660.1.1
query:13960;rank:1	-0.97624	1	1	X.TGGVKQASHLLKYDSTLGIFD.X	Solyc04g009030.2.1
query:21512;rank:1	-0.97627	1	1	X.GAWNVTITLSSYYNNTYVNDNPCCSYT.X	Solyc09g015210.1.1
query:16906;rank:1	-0.97627	1	1	X.QMVVESTDTTHNNAAGSGSEKSN.X	Solyc03g007800.2.1
query:2293;rank:1	-0.97627	1	1	X.QELDFARAVS.X	Solyc08g059810.1.1
query:1304;rank:1	-0.97627	1	1	X.KSASKGSSS.X	Solyc03g005860.2.1
query:20950;rank:1	-0.976323	1	1	X.KAEGIFRINPENSEEEHVRDQLNRGIVPE.X	Solyc06g084450.2.1
query:17764;rank:1	-0.976323	1	1	X.QVEALEAKMKKVKGALVRSSKETFG.X	Solyc01g057940.1.1
query:21952;rank:1	-0.976365	1	1	X.NKLKVGDVCVFEVIKGTQIFMNVTIFRAAGSMP.X	Solyc02g065310.1.1
query:20742;rank:1	-0.976365	1	1	X.VQKGDILMLSLARMHELRNARVQALLFVGN.X	Solyc01g016810.1.1
query:18790;rank:1	-0.976365	1	1	X.GVGIAVLVRCFVNKKNMEAEIVDRLGN.X	Solyc05g016030.2.1
query:7940;rank:1	-0.976365	1	1	X.LQTILKGSCKGELLV.X	Solyc09g015800.1.1
query:5919;rank:1	-0.976365	1	1	X.FVTCDDPKGVIEGK.X	Solyc12g007140.1.1
query:11290;rank:1	-0.976378	1	1	X.NVAKQSGKSSPANPSLLGLN.X	Solyc03g123810.1.1
query:10298;rank:1	-0.976378	1	1	X.HSATKFISKTYKREI.X	Solyc06g066080.1.1
query:7488;rank:1	-0.976378	1	1	X.GSRIVESLPLSKRK.X	Solyc04g064680.2.1
query:1084;rank:1	-0.976378	1	1	X.LNLKIYVP.X	Solyc12g009650.1.1
query:21382;rank:1	-0.97646	1	1	X.AAQQLSQTAMTFGHSNPFIKSREQQERLRE.X	Solyc02g086580.2.1
query:7478;rank:1	-0.97646	1	1	X.KKHYSTRKAFVGF.X	Solyc02g065500.2.1
query:9099;rank:1	-0.976516	1	1	X.KLPIVGAFCVLTFGLSN.X	Solyc04g076050.2.1
query:17242;rank:1	-0.976521	1	1	X.PINRPSMRRVVKMLQEVGGGNLP.X	Solyc02g077630.2.1
query:21038;rank:1	-0.976556	1	1	X.QELGLKQSGYIVFCDSQSSMDLSKNSM.X	Solyc00g222460.1.1
query:10411;rank:1	-0.97662	1	1	X.KGKQISANLPYKVEFV.X	Solyc01g087520.2.1
query:5589;rank:1	-0.97662	1	1	X.WTRHKLASRSLN.X	Solyc06g083400.1.1
query:563;rank:1	-0.97662	1	1	X.IGNGKVDGL.X	Solyc01g081640.2.1
query:16081;rank:1	-0.976651	1	1	X.MFRNAQFRLELQQSLEQAALP.X	Solyc04g082310.2.1
query:7072;rank:1	-0.976651	1	1	X.KTKASAGKVNTGSIP.X	Solyc08g074680.2.1
query:17746;rank:1	-0.976654	1	1	X.AVSISNGVFVLIFSRIGTLLSLLTLN.X	Solyc12g013910.1.1
query:14966;rank:1	-0.976654	1	1	X.MATLKDEGVTMIWICCMGGVGK.X	Solyc10g054970.1.1
query:1799;rank:1	-0.976654	1	1	X.VYLFGKLSG.X	Solyc02g030450.2.1
query:22933;rank:1	-0.976719	1	1	X.VAPAKKGKVASSSDDSDSSDEDEAPAKKVVVASTKN.X	Solyc02g014310.2.1
query:19922;rank:1	-0.976719	1	1	X.PLKTLRAEIATLGSRMVSVFVITEGNEGN.X	Solyc07g053290.2.1
query:11335;rank:1	-0.976719	1	1	X.EPTGKTSEFKALRVLVIP.X	Solyc01g103610.2.1
query:8365;rank:1	-0.976719	1	1	X.EGVDGTGVNTKMLTCN.X	Solyc01g087140.2.1
query:5180;rank:1	-0.976719	1	1	X.PLNPRSAGTNRLQ.X	Solyc01g109590.2.1
query:1497;rank:1	-0.976719	1	1	X.KKLVAIAPAI.X	Solyc04g076620.2.1
query:21489;rank:1	-0.976746	1	1	X.ILLKTEHVKVISDLILDMHLKLVKSWTGPGG.X	Solyc03g096890.1.1
query:16135;rank:1	-0.976746	1	1	X.IGEVPGTLRGLNKLVNLDLALNN.X	Solyc03g006300.1.1
query:10009;rank:1	-0.976792	1	1	X.FPIMALLAGVLGGVFGIGGG.X	Solyc02g079980.2.1
query:9171;rank:1	-0.976792	1	1	X.LPCGSCSLKVRLLINGN.X	Solyc12g088890.1.1
query:6819;rank:1	-0.976792	1	1	X.KWLEVVLSIKEAAN.X	Solyc01g091460.2.1
query:10047;rank:1	-0.976818	1	1	X.ALRKLLLPKNTSVVISN.X	Solyc10g083240.1.1
query:12063;rank:1	-0.976917	1	1	X.SNIGVPVLESPSMISSTT.X	Solyc09g042800.1.1
query:11087;rank:1	-0.976931	1	1	X.SVSPIVKKCLSFSGTLSPN.X	Solyc03g119220.2.1
query:19210;rank:1	-0.976931	1	1	X.KKKASSMIVCSKNPLASVVDRQGVNES.X	Solyc10g080320.1.1
query:16803;rank:1	-0.976931	1	1	X.FSSLSYYKKRGKSLASRSLGIVA.X	Solyc02g068270.2.1
query:1819;rank:1	-0.976931	1	1	X.GSDGTSVEKST.X	Solyc01g060040.2.1
query:20959;rank:1	-0.976937	1	1	X.TKWGMKQTDHELVDLMERAQTKYQIILT.X	Solyc06g007150.2.1
query:11122;rank:1	-0.976937	1	1	X.VVPLGQLMAAKITKRVF.X	Solyc08g082990.2.1
query:10587;rank:1	-0.976937	1	1	X.KVKYMKLRKLFSGKN.X	Solyc11g013500.1.1
query:3130;rank:1	-0.976937	1	1	X.AFFMPRALTT.X	Solyc08g029270.1.1
query:18175;rank:1	-0.977016	1	1	X.GSGPTSYFISGLGNGSLTGSIMPNSS.X	Solyc05g010340.2.1
query:20396;rank:1	-0.977016	1	1	X.SCSPPLVTTSSNRSRGKSPVPSSSPLI.X	Solyc03g117100.2.1
query:10433;rank:1	-0.977016	1	1	X.ATVHITGGASIMIQYT.X	Solyc02g067450.2.1
query:20391;rank:1	-0.977032	1	1	X.PGEQSSMTSNMMPQQSHRQNGFATPH.X	Solyc12g017260.1.1
query:13799;rank:1	-0.977032	1	1	X.VVSIWIMKRKKKGKSKDV.X	Solyc04g009640.2.1
query:15248;rank:1	-0.977032	1	1	X.NVNISMNVNVNVKVNVNVNVNL.X	Solyc03g058570.1.1
query:14893;rank:1	-0.977069	1	1	X.EDLFPSSSENSSFLTVE.X	Solyc09g057640.2.1
query:2308;rank:1	-0.977069	1	1	X.SLAVLLSSTFV.X	Solyc05g026370.1.1
query:19953;rank:1	-0.977115	1	1	X.KLKELKQQFEGKTVLLGVDDLDIFKGIN.X	Solyc07g055300.2.1
query:16103;rank:1	-0.977115	1	1	X.TTPLSMFSAAASSGFSTPAT.X	Solyc11g072600.1.1
query:15175;rank:1	-0.977115	1	1	X.KYWGKGIATKAVKMAVSAIFVD.X	Solyc09g082230.1.1
query:4962;rank:1	-0.977115	1	1	X.ITKDLKVTRVF.X	Solyc06g053810.2.1
query:11372;rank:1	-0.977128	1	1	X.MGQQVHSYHDSSLMD.X	Solyc02g036270.2.1
query:12622;rank:1	-0.977207	1	1	X.TSLIFSQPHKIPRLTPL.X	Solyc11g066600.1.1
query:6631;rank:1	-0.977214	1	1	X.STTSKQNQSNS.X	Solyc07g049720.2.1
query:4077;rank:1	-0.977214	1	1	X.GASSSSGSTLDC.X	Solyc06g035630.1.1
query:5139;rank:1	-0.977223	1	1	X.STGKKKSLSVKRV.X	Solyc12g010740.1.1
query:15530;rank:1	-0.977313	1	1	X.AGTLLITLTIVILIRIWVNRS.X	Solyc03g026040.2.1
query:14759;rank:1	-0.977313	1	1	X.INTVASSEMITTSSVAAN.X	Solyc01g049780.1.1
query:15400;rank:1	-0.977318	1	1	X.LGVKPTRKGDLKGIPILTHPK.X	Solyc02g069090.2.1
query:16755;rank:1	-0.977412	1	1	X.KNGVGKAPGSITLREESGVKKKQT.X	Solyc04g007420.2.1
query:16029;rank:1	-0.977412	1	1	X.NIAVILQEAGVQSARAIKPQTTN.X	Solyc06g075600.2.1
query:3049;rank:1	-0.977412	1	1	X.KDLSVPTETR.X	Solyc01g087120.2.1
query:22798;rank:1	-0.977414	1	1	X.MGAQLQPRVIGLPRSQGVLDVEVYSINRAQLRTSTSN.X	Solyc06g051410.2.1
query:1725;rank:1	-0.977483	1	1	X.SVQLPLVWN.X	Solyc08g080340.2.1
query:20002;rank:1	-0.977511	1	1	X.LETLDVLNAVYLTFYNVMFCSTVGS.X	Solyc01g090070.1.1
query:10885;rank:1	-0.977511	1	1	X.TLHRISAIRNRKGEVI.X	Solyc04g005830.2.1
query:8531;rank:1	-0.977511	1	1	X.IVMGRKSLPDPSKKTG.X	Solyc03g113510.1.1
query:1051;rank:1	-0.977511	1	1	X.NSMLLKVG.X	Solyc09g090290.2.1
query:9748;rank:1	-0.977604	1	1	X.RDLFGPKVDLGLIKRN.X	Solyc02g090860.2.1
query:22946;rank:1	-0.977621	1	1	X.IELVNIEEFKGCMMKLNDAIKCKIDKYSHGKRTKVV.X	Solyc05g008290.2.1
query:8654;rank:1	-0.977699	1	1	X.SPRFGIMKKTPITTS.X	Solyc04g078810.2.1
query:6087;rank:1	-0.977699	1	1	X.IKSWAPSPPSKVF.X	Solyc02g069480.1.1
query:3019;rank:1	-0.977699	1	1	X.TTTQASTD.X	Solyc05g017810.1.1
query:19139;rank:1	-0.977759	1	1	X.VSVMTVLFVVCGLTMSDLFAAILAFVPT.X	Solyc07g056260.2.1
query:16098;rank:1	-0.977759	1	1	X.ILCAAELFSFKFMQIFVKTLTG.X	Solyc12g099030.1.1
query:10944;rank:1	-0.977759	1	1	X.QALKMKKQPVLAVGRSN.X	Solyc02g087250.2.1
query:5164;rank:1	-0.977795	1	1	X.GIIAIAVKVAAIGLN.X	Solyc04g010080.2.1
query:3356;rank:1	-0.977795	1	1	X.RNMTTVLTR.X	Solyc02g094500.2.1
query:11779;rank:1	-0.977809	1	1	X.RLGITTVVSTDSIRHMM.X	Solyc11g069780.1.1
query:12901;rank:1	-0.97789	1	1	X.FRAMPNVLMLRPADGNETA.X	Solyc05g050970.2.1
query:6740;rank:1	-0.97789	1	1	X.SSSSASTPVSKR.X	Solyc12g009620.1.1
query:19755;rank:1	-0.97789	1	1	X.GRLNVLGNVVRKPLRQIFSEFTGGTKP.X	Solyc04g011350.2.1
query:17658;rank:1	-0.97789	1	1	X.PSRSLPVSFQGEKLVGLKLKDSRI.X	Solyc04g007320.1.1
query:21276;rank:1	-0.977897	1	1	X.NQAGLDYMMNIEVGKNDYDWLKTPPATPLFP.X	Solyc11g008840.1.1
query:9693;rank:1	-0.977897	1	1	X.YYSGNGGLGSWTGLMN.X	Solyc03g112930.2.1
query:6174;rank:1	-0.977897	1	1	X.ILRNRRIPYGYN.X	Solyc09g015850.2.1
query:20774;rank:1	-0.977908	1	1	X.KIKMVASEFSAGDGMGLNKGNMMKIKSTVKN.X	Solyc03g078650.2.1
query:5197;rank:1	-0.977908	1	1	X.GSGKSTVISLLQR.X	Solyc12g098870.1.1
query:22752;rank:1	-0.977985	1	1	X.RVSPRKGGTLTSIVTSTQSISMAGGRGRGKSSGK.X	Solyc10g009630.1.1
query:15341;rank:1	-0.978007	1	1	X.MFSSMIKNMSPEMMSNMS.X	Solyc06g073840.2.1
query:4982;rank:1	-0.978036	1	1	X.PRLKFLLIEGTN.X	Solyc12g009450.1.1
query:13114;rank:1	-0.978081	1	1	X.FPSPSSSSITLTNVLNADAVH.X	Solyc02g094590.2.1
query:10254;rank:1	-0.978081	1	1	X.KIQEAEKLVNEMDIEP.X	Solyc01g091610.1.1
query:1766;rank:1	-0.978081	1	1	X.TDQTNKPGVV.X	Solyc12g017630.1.1
query:14907;rank:1	-0.978174	1	1	X.SRMTLQQILARAVGEEIIMN.X	Solyc02g090890.2.1
query:13593;rank:1	-0.978174	1	1	X.SSSGITYKASSASFSS.X	Solyc08g065890.2.1
query:11447;rank:1	-0.978174	1	1	X.VSGLQGRVPGFGTNALVFT.X	Solyc04g025990.2.1
query:11416;rank:1	-0.978174	1	1	X.MIEKPKKKRRKNRVS.X	Solyc08g006130.1.1
query:9915;rank:1	-0.978174	1	1	X.KKSSKLLPVIGWSMW.X	Solyc03g063880.2.1
query:1370;rank:1	-0.978174	1	1	X.PNISSVFKN.X	Solyc01g079710.2.1
query:20186;rank:1	-0.978176	1	1	X.VITGRSCSSCDYSKESISVKDKIGVN.X	Solyc06g007300.1.1
query:23015;rank:1	-0.978176	1	1	X.YVETYIKHKNRLAKYGMVPKHSFLNELSSCSAALVPE.X	Solyc01g112120.2.1
query:20393;rank:1	-0.978176	1	1	X.VNVSITSDTYDVTQASTIYHMLGLI.X	Solyc01g011260.1.1
query:19929;rank:1	-0.978176	1	1	X.STATALVISPFLRFPKIFNSKLDFRR.X	Solyc02g062580.2.1
query:11331;rank:1	-0.978176	1	1	X.NPILGTLFVVVATVLLR.X	Solyc04g014790.1.1
query:10071;rank:1	-0.978205	1	1	X.TMYGKLSNVKSATKVF.X	Solyc08g075350.1.1
query:10022;rank:1	-0.978205	1	1	X.PSISSSSVGVSRAYM.X	Solyc01g090780.2.1
query:9334;rank:1	-0.978205	1	1	X.IETVSGTLLITCRTTN.X	Solyc04g047830.1.1
query:22402;rank:1	-0.978271	1	1	X.MEALPSKSSEETLEKPKTETGSTSSPHDKN.X	Solyc03g119850.1.1
query:6182;rank:1	-0.978271	1	1	X.LKSLQKIVLADNN.X	Solyc11g006040.1.1
query:16728;rank:1	-0.978304	1	1	X.LKLIMTAVAVVVVDKLGRRPLLLG.X	Solyc03g096950.2.1
query:13554;rank:1	-0.978304	1	1	X.PSASAAPTQGARGRPPAKLSAPN.X	Solyc06g036010.1.1
query:4471;rank:1	-0.978304	1	1	X.KAAGIPSACGVSIP.X	Solyc10g075070.1.1
query:13400;rank:1	-0.978312	1	1	X.VTLSVICPRKLPKLRAIYN.X	Solyc05g009710.2.1
query:10069;rank:1	-0.978312	1	1	X.TAVGSAMASIVLFESNI.X	Solyc03g042560.1.1
query:9281;rank:1	-0.978312	1	1	X.IIVIVMILCILLQSNI.X	Solyc01g104380.2.1
query:8723;rank:1	-0.978312	1	1	X.KMLKKREKKPGNVSS.X	Solyc06g068230.2.1
query:5396;rank:1	-0.978312	1	1	X.LPRLKILDLSYN.X	Solyc10g076490.1.1
query:3109;rank:1	-0.978367	1	1	X.CFLEMSGESTN.X	Solyc06g008130.2.1
query:1556;rank:1	-0.978367	1	1	X.ISKTMKAKE.X	Solyc04g008950.2.1
query:18251;rank:1	-0.978403	1	1	X.LAEFDSMTTSSLMASALSSSSSSL.X	Solyc03g025310.2.1
query:12402;rank:1	-0.978403	1	1	X.LHPKLELVSRSWQAAIR.X	Solyc09g065400.1.1
query:11426;rank:1	-0.978403	1	1	X.LMSKLIVVLAVVRRTSN.X	Solyc01g057150.1.1
query:1735;rank:1	-0.978403	1	1	X.SYFYVALN.X	Solyc01g091180.2.1
query:18681;rank:1	-0.97845	1	1	X.KVLVNTFDALEFDAVNVIESVTISG.X	Solyc12g098600.1.1
query:9594;rank:1	-0.97845	1	1	X.KKNQLFKEQISLLKD.X	Solyc12g056460.1.1
query:1544;rank:1	-0.97845	1	1	X.NMIRKDEL.X	Solyc08g074260.2.1
query:757;rank:1	-0.97845	1	1	X.ATTSASATN.X	Solyc02g060580.1.1
query:14031;rank:1	-0.978462	1	1	X.IQPITRILVGVAVITLLIVM.X	Solyc04g072120.2.1
query:10040;rank:1	-0.978588	1	1	X.QNKLKTHVIEMGKFI.X	Solyc06g075970.2.1
query:8658;rank:1	-0.978588	1	1	X.KSIAFAKSKIVTAHQD.X	Solyc03g111780.1.1
query:17153;rank:1	-0.978601	1	1	X.PVMLIVTSKLMNNLGGNDSSDTFT.X	Solyc02g087410.2.1
query:8851;rank:1	-0.978601	1	1	X.SFPLLEKLLLYDLN.X	Solyc12g017800.1.1
query:4303;rank:1	-0.978601	1	1	X.LIRAQSPMSSDL.X	Solyc01g095010.2.1
query:20149;rank:1	-0.978652	1	1	X.AAGDALLAAAAVHREVVINEKGKLENVEIQN.X	Solyc09g009240.1.1
query:14791;rank:1	-0.978652	1	1	X.AGMGRGSASRRGEGRGISAESVL.X	Solyc07g054030.1.1
query:15408;rank:1	-0.9787	1	1	X.QKITFNKAVNLRAGINKISLLS.X	Solyc06g062580.2.1
query:5488;rank:1	-0.9787	1	1	X.QAASVRKVLKNKN.X	Solyc07g005850.1.1
query:15277;rank:1	-0.978726	1	1	X.KKAILVLGVGMLFLALAFTYVF.X	Solyc02g068830.1.1
query:3435;rank:1	-0.978726	1	1	X.NRAKEIGLDIE.X	Solyc10g085860.1.1
query:498;rank:1	-0.978726	1	1	X.AMNVVLSGG.X	Solyc03g031760.2.1
query:346;rank:1	-0.978726	1	1	X.QRVPLSGS.X	Solyc07g062160.2.1
query:21267;rank:1	-0.978748	1	1	X.IPTIPKRPPVDRVKYLQSAPVNVPVMSAAAR.X	Solyc06g074260.2.1
query:18902;rank:1	-0.978799	1	1	X.PKDTLVSMWHFTNKWKAVDQDGPW.X	Solyc04g028380.1.1
query:12610;rank:1	-0.978799	1	1	X.TAGLSIVVVVLACVKRRKN.X	Solyc07g008400.1.1
query:17945;rank:1	-0.978843	1	1	X.IASMYLELISVDSSISNEMNNLGLS.X	Solyc09g061420.2.1
query:17920;rank:1	-0.978843	1	1	X.VFGLPIRPSFCRAVLSKDDLRVE.X	Solyc07g007620.2.1
query:14648;rank:1	-0.978843	1	1	X.LGGAMVPGLIITVGSLLLPETPN.X	Solyc03g006650.1.1
query:21002;rank:1	-0.978864	1	1	X.PKGDFTKFTTLHVVGDLVELLNIIAPDRKVF.X	Solyc01g066460.2.1
query:8957;rank:1	-0.978864	1	1	X.TVGSLLVSFTVYIIP.X	Solyc10g055260.1.1
query:8553;rank:1	-0.978864	1	1	X.KFLSIIRIEGEGGWK.X	Solyc12g017620.1.1
query:2461;rank:1	-0.978898	1	1	X.AAVVGGKIYVAGG.X	Solyc11g072080.1.1
query:20504;rank:1	-0.978938	1	1	X.ALVFVTRYLDIFTDFISLYNTTMKLVF.X	Solyc09g091900.2.1
query:14425;rank:1	-0.978997	1	1	X.GGCTYSLSAIHNGILRSNQ.X	Solyc04g072380.2.1
query:13129;rank:1	-0.978997	1	1	X.IVGMPPPSSGTLGISLILKVV.X	Solyc12g008640.1.1
query:9631;rank:1	-0.979003	1	1	X.GSQKSFEILAGEFFN.X	Solyc02g031750.2.1
query:10067;rank:1	-0.979034	1	1	X.KPISRNLSIRASVST.X	Solyc01g109850.2.1
query:19705;rank:1	-0.979096	1	1	X.SPKSFSSFAEWEKGGLIPRFVANTGKES.X	Solyc02g088430.1.1
query:3964;rank:1	-0.979096	1	1	X.GRLPLKMSQRN.X	Solyc09g075330.2.1
query:12580;rank:1	-0.979129	1	1	X.GSAALKDRSKHIPGTSRLQ.X	Solyc03g118530.2.1
query:9646;rank:1	-0.979129	1	1	X.GLSSLVTVGVRDIQGEGF.X	Solyc02g086640.2.1
query:20283;rank:1	-0.979141	1	1	X.MIALSGAHTLGFSHCDRFANRLYSFTPS.X	Solyc02g094180.2.1
query:13228;rank:1	-0.979141	1	1	X.QVMDVSLVGADPPLPPPRPS.X	Solyc02g064720.2.1
query:12835;rank:1	-0.979141	1	1	X.TYTFAVVLKVCVGLMDLNK.X	Solyc07g042720.1.1
query:1124;rank:1	-0.979141	1	1	X.LISGDKSVM.X	Solyc06g009540.1.1
query:18658;rank:1	-0.979279	1	1	X.NTEQSFRSIMSEPSPGILTFQMLQP.X	Solyc04g080880.2.1
query:13776;rank:1	-0.979279	1	1	X.LISSSQLLHLILLLLSIMSN.X	Solyc08g069040.2.1
query:12975;rank:1	-0.979295	1	1	X.LNPGTLSQKILLTGLSYKD.X	Solyc01g080390.1.1
query:23078;rank:1	-0.97932	1	1	X.DAVMPYLKTILVNANDKSNRMLRAKAMECISLVGMAVGK.X	Solyc01g044360.2.1
query:14822;rank:1	-0.97932	1	1	X.RLRRVSALFARLEKDIRFN.X	Solyc02g070530.2.1
query:14685;rank:1	-0.97932	1	1	X.QPVRRKQMHSNPKKVLHAL.X	Solyc02g082660.2.1
query:5015;rank:1	-0.979394	1	1	X.INVKPSKPSLEN.X	Solyc05g009930.2.1
query:16632;rank:1	-0.979394	1	1	X.PASKSRFPQMIASTLGFGQKHD.X	Solyc08g076210.2.1
query:10150;rank:1	-0.979394	1	1	X.TYGPAEMIQILAIRAQV.X	Solyc11g069370.1.1
query:7792;rank:1	-0.979415	1	1	X.NFSPHPQKLPFAVTS.X	Solyc03g097710.2.1
query:3699;rank:1	-0.979415	1	1	X.EGWVPMHLIAN.X	Solyc04g081820.2.1
query:14108;rank:1	-0.979417	1	1	X.FKKVVKLSKKKVGKTESKQ.X	Solyc06g065010.2.1
query:12297;rank:1	-0.979417	1	1	X.SRVGDSEASSTSSLNV.X	Solyc01g081030.2.1
query:10949;rank:1	-0.979417	1	1	X.KASATVLVDKSEAEKVN.X	Solyc09g007560.2.1
query:9873;rank:1	-0.979493	1	1	X.SAYTSGQNLAVDGGLSSIL.X	Solyc01g073640.2.1
query:20335;rank:1	-0.97951	1	1	X.KAMAVAGRVAIMEEGTTLKASCPVCLQVLSTP.X	Solyc03g115330.1.1
query:7249;rank:1	-0.97951	1	1	X.KMADDTSVRTLHLK.X	Solyc10g006550.1.1
query:3906;rank:1	-0.97951	1	1	X.LDVLQKVFYGN.X	Solyc01g088310.2.1
query:1589;rank:1	-0.979555	1	1	X.PVSLAGPLSSN.X	Solyc04g047850.1.1
query:19699;rank:1	-0.979555	1	1	X.SLKFGDGMELLSPTKLVVAGNPTRLVES.X	Solyc01g079410.2.1
query:12314;rank:1	-0.979555	1	1	X.ALPLAILQICLVLVVTRGLA.X	Solyc12g056160.1.1
query:7599;rank:1	-0.979592	1	1	X.PFGDPKAIGDPYSTL.X	Solyc09g098390.2.1
query:14881;rank:1	-0.979605	1	1	X.VIATNRQLSVLHPIHKLLHP.X	Solyc01g099180.2.1
query:846;rank:1	-0.979605	1	1	X.MLGPGETTD.X	Solyc06g050530.2.1
query:2331;rank:1	-0.979691	1	1	X.HTRFYRGSN.X	Solyc07g025130.1.1
query:20691;rank:1	-0.979693	1	1	X.EYMPNGTLDKWLYNHNFFLDMLQRLSI.X	Solyc02g068820.1.1
query:11295;rank:1	-0.979693	1	1	X.TYKRRKRTKVVEDGFV.X	Solyc04g058190.2.1
query:6638;rank:1	-0.979693	1	1	X.IPSGGEYLMKISIGT.X	Solyc08g005840.1.1
query:4463;rank:1	-0.979693	1	1	X.MTVMTPPSFNN.X	Solyc02g084380.2.1
query:3433;rank:1	-0.979693	1	1	X.KSGSTGDRLKE.X	Solyc07g064030.2.1
query:15915;rank:1	-0.979701	1	1	X.LIMSILIAVVITILLLAVVPVSGG.X	Solyc10g054840.1.1
query:12599;rank:1	-0.979701	1	1	X.NGIRHLTAAECEKIAKNR.X	Solyc03g113000.2.1
query:6325;rank:1	-0.979701	1	1	X.RSSGECRTTFLKGGG.X	Solyc00g036750.1.1
query:6635;rank:1	-0.97979	1	1	X.KPRYGTSRRSTI.X	Solyc01g097160.2.1
query:1827;rank:1	-0.97979	1	1	X.SLTLKRKAA.X	Solyc02g094420.2.1
query:3579;rank:1	-0.979796	1	1	X.IPITIGGLKELN.X	Solyc05g007230.2.1
query:2146;rank:1	-0.979796	1	1	X.KDTLKPVLI.X	Solyc05g056030.2.1
query:12281;rank:1	-0.979831	1	1	X.KLLLKKCDVNKKLTWMN.X	Solyc04g025790.1.1
query:5665;rank:1	-0.979831	1	1	X.GSSSMTSAHSK.X	Solyc03g097820.1.1
query:5297;rank:1	-0.979831	1	1	X.TFLLAVAETLRDS.X	Solyc09g005330.2.1
query:4839;rank:1	-0.979831	1	1	X.KVVVQSKDKIIE.X	Solyc03g083060.2.1
query:9286;rank:1	-0.979889	1	1	X.KRLKYIHAWRKVSN.X	Solyc01g109380.2.1
query:2046;rank:1	-0.979889	1	1	X.GKSHHSKVVN.X	Solyc02g090330.2.1
query:3182;rank:1	-0.979891	1	1	X.KRQAFVTYVE.X	Solyc03g111150.2.1
query:18956;rank:1	-0.979891	1	1	X.GSSSTSSRLREETIQVATIEAD.X	Solyc11g032080.1.1
query:15732;rank:1	-0.979891	1	1	X.KWSGIIAVVSLTVFLMSLTAAT.X	Solyc06g050130.2.1
query:20888;rank:1	-0.97997	1	1	X.GSGRDGFSTQVSSMNTSSGSVGSMFSKGG.X	Solyc01g067550.2.1
query:19958;rank:1	-0.97997	1	1	X.LPEYSQTASSTHSGSSSSRPSSNYN.X	Solyc07g045230.2.1
query:9941;rank:1	-0.97997	1	1	X.ADFATKELEIGERVVT.X	Solyc04g051680.2.1
query:14705;rank:1	-0.97997	1	1	X.FSQRGPLQSSNTSSVRAWMDP.X	Solyc07g062680.1.1
query:10045;rank:1	-0.979987	1	1	X.SLRLILLGLDLPLHVN.X	Solyc05g056470.1.1
query:3138;rank:1	-0.979987	1	1	X.AIGPLLPTKMD.X	Solyc04g008310.1.1
query:19451;rank:1	-0.979988	1	1	X.SSSHSNYLELINGTYAGVMVSHGRGCL.X	Solyc11g066780.1.1
query:5430;rank:1	-0.979988	1	1	X.STVNTNGIPASNN.X	Solyc06g074530.1.1
query:14647;rank:1	-0.980082	1	1	X.VMVLLASKYSQELIPLSSHIN.X	Solyc01g097110.1.1
query:13455;rank:1	-0.980082	1	1	X.ENSFSSEYCDVNDFLVQN.X	Solyc03g095980.2.1
query:8385;rank:1	-0.980087	1	1	X.AGITIVKVLSEVIANI.X	Solyc10g047280.1.1
query:4730;rank:1	-0.980087	1	1	X.AGEVLGKRKMGSE.X	Solyc04g077100.2.1
query:19241;rank:1	-0.980108	1	1	X.AHMLKYHSEKLAVAFAILNVPSRRPI.X	Solyc11g039540.1.1
query:12485;rank:1	-0.980108	1	1	X.KQLMEAKGIKQLPVVKRGG.X	Solyc07g066210.2.1
query:5486;rank:1	-0.980108	1	1	X.LASSISSLGIKKGD.X	Solyc03g031940.2.1
query:17291;rank:1	-0.980177	1	1	X.VPDLEKSMYMAIDGYPCVRLLNL.X	Solyc11g011480.1.1
query:14849;rank:1	-0.980186	1	1	X.LHPSSSTSSEIEESRGT.X	Solyc12g088230.1.1
query:19294;rank:1	-0.980246	1	1	X.LSVLHFFIKQIAQISPSSTKHVISQVF.X	Solyc01g111870.1.1
query:19175;rank:1	-0.980246	1	1	X.QSASYLSTDETILASVKSLSEKVTSF.X	Solyc03g115710.1.1
query:15891;rank:1	-0.980246	1	1	X.KDQSSRGKKRRRESKKSPSSA.X	Solyc07g065490.2.1
query:21615;rank:1	-0.980273	1	1	X.SSSTTVNTSTTHHDHESDQEADQLVSLSLG.X	Solyc06g070990.2.1
query:15161;rank:1	-0.980273	1	1	X.LKELSTNPQLAPRLRFMVRN.X	Solyc07g005810.2.1
query:12771;rank:1	-0.980273	1	1	X.MPPTTSTTTPPPMSS.X	Solyc08g078020.1.1
query:886;rank:1	-0.980368	1	1	X.CGVDKTPQ.X	Solyc05g053500.2.1
query:184;rank:1	-0.980368	1	1	X.ITRSSTY.X	Solyc04g078720.1.1
query:21488;rank:1	-0.980384	1	1	X.QNVISKHISVDDNQNKSFWRIRRSTSLHGN.X	Solyc12g036440.1.1
query:9214;rank:1	-0.980384	1	1	X.KVGSTKAPAATVTRTQP.X	Solyc10g074820.1.1
query:7840;rank:1	-0.980384	1	1	X.IHFRVLAKALRMSGG.X	Solyc01g007330.2.1
query:559;rank:1	-0.980384	1	1	X.KALSMVK.X	Solyc02g092470.2.1
query:4037;rank:1	-0.980463	1	1	X.GGGSSKSEMVGG.X	Solyc10g061930.1.1
query:12208;rank:1	-0.980483	1	1	X.KIMNIKLEESSVSFDLNS.X	Solyc08g076010.2.1
query:11949;rank:1	-0.980483	1	1	X.HFCFQSNSSSYRTY.X	Solyc12g027690.1.1
query:9980;rank:1	-0.980483	1	1	X.FTNNMVNAPNQIHSMK.X	Solyc03g111130.1.1
query:365;rank:1	-0.980483	1	1	X.TYRHVVA.X	Solyc03g080070.2.1
query:15076;rank:1	-0.980522	1	1	X.TATSSAAQTSSPLTVASSSGT.X	Solyc01g090670.2.1
query:13031;rank:1	-0.980558	1	1	X.VSNSTPLVGQGGDYGRSKS.X	Solyc02g014450.1.1
query:6027;rank:1	-0.980558	1	1	X.EVALKGALATKFRN.X	Solyc09g090700.1.1
query:18177;rank:1	-0.980583	1	1	X.VFGKGELVMDRRLIAIRYLKNAFV.X	Solyc03g114110.2.1
query:18295;rank:1	-0.980654	1	1	X.VTSEIKGSFAITTSAHGDSVESSG.X	Solyc06g083420.1.1
query:14941;rank:1	-0.980654	1	1	X.SHFRTGEATITLQDVEVFY.X	Solyc11g020020.1.1
query:15207;rank:1	-0.98066	1	1	X.EKLVIRSPSLKRLRLNRFV.X	Solyc04g074980.2.1
query:2644;rank:1	-0.98066	1	1	X.KNIQLHLHSV.X	Solyc12g019370.1.1
query:20326;rank:1	-0.980682	1	1	X.STKLNQPQKPTKVDLNSAVYPGGPPSPAR.X	Solyc02g077780.2.1
query:5424;rank:1	-0.980749	1	1	X.KLMRPGFEGRKE.X	Solyc02g082130.1.1
query:3872;rank:1	-0.980749	1	1	X.NILGMPMSKASL.X	Solyc10g007810.2.1
query:15533;rank:1	-0.980781	1	1	X.SISDLSALTIISVYTNDFS.X	Solyc09g072810.2.1
query:6314;rank:1	-0.980781	1	1	X.DTTSQSESSEMN.X	Solyc04g015460.2.1
query:2675;rank:1	-0.980781	1	1	X.GKTLAFGIPVL.X	Solyc08g042050.2.1
query:16301;rank:1	-0.980798	1	1	X.DCSSGSSVTTSNSMAEGVKN.X	Solyc03g115940.2.1
query:13382;rank:1	-0.980798	1	1	X.IIVGVAAAGGLLLLVMLVFLIS.X	Solyc11g044460.1.1
query:2604;rank:1	-0.980798	1	1	X.PRVRGSEVPDA.X	Solyc06g053330.2.1
query:18176;rank:1	-0.980798	1	1	X.SFRNMSAAKVKQTSLMGTKGIKQG.X	Solyc07g065600.2.1
query:14373;rank:1	-0.980798	1	1	X.MYDIKRTELHRPWTSMEP.X	Solyc04g005500.2.1
query:9833;rank:1	-0.980798	1	1	X.KRHMLLTEEILKKNP.X	Solyc05g053170.2.1
query:22440;rank:1	-0.98088	1	1	X.FPASPLGSPVLPGSPIGRRNEIKPSPGSGRNNGLYSGW.X	Solyc03g123980.2.1
query:17966;rank:1	-0.98088	1	1	X.QIVLLSCNVICHVGVLLLHLLRGGCN.X	Solyc03g044910.1.1
query:5387;rank:1	-0.98088	1	1	X.KFKLKGAAVLTVAV.X	Solyc05g041890.1.1
query:22852;rank:1	-0.980937	1	1	X.GSGFTWESMFIGYSCGLVVGTVVFTLIFNAGKTKWLV.X	Solyc12g019870.1.1
query:21135;rank:1	-0.980937	1	1	X.LFLITQKKGGDCFKTLVKLRQLRTLILSN.X	Solyc12g099040.1.1
query:19446;rank:1	-0.980937	1	1	X.TYFLKKKKKSTMLVEEKEVKHIDDH.X	Solyc03g033250.1.1
query:10149;rank:1	-0.980937	1	1	X.GLSNKMLHRGVLPTAVT.X	Solyc08g023490.2.1
query:22802;rank:1	-0.98094	1	1	X.NIAIKVIDKKSIIGTNVSMEPRILREISIMSCLN.X	Solyc03g005330.1.1
query:19201;rank:1	-0.98094	1	1	X.ELQLLSVKKRESSGGGGIMFNLNKENEG.X	Solyc02g087840.2.1
query:16085;rank:1	-0.98094	1	1	X.AVIGMELSAAKQWILAVKIGGVR.X	Solyc07g053190.2.1
query:17809;rank:1	-0.980979	1	1	X.GNGKGRTSIVWSESSIDTTKSA.X	Solyc12g099230.1.1
query:9694;rank:1	-0.980979	1	1	X.PEHQDLLCASKCSFV.X	Solyc11g006220.1.1
query:4761;rank:1	-0.981035	1	1	X.SKSVMTDCSS.X	Solyc03g025820.1.1
query:6559;rank:1	-0.981075	1	1	X.DKSTANLVQIKGRF.X	Solyc08g008550.2.1
query:5685;rank:1	-0.981075	1	1	X.LPTEVLKGFKAMM.X	Solyc01g098370.1.1
query:6197;rank:1	-0.981078	1	1	X.VEEKTSGGLFLSQAA.X	Solyc12g009250.1.1
query:6787;rank:1	-0.981177	1	1	X.VLAVGRSNIVTGVAKN.X	Solyc02g087250.2.1
query:2795;rank:1	-0.981177	1	1	X.TAVLGSFGIASAGG.X	Solyc06g036720.2.1
query:19847;rank:1	-0.981213	1	1	X.SELFENSSRRSLGRSSSLEQNLNLN.X	Solyc01g080340.2.1
query:15089;rank:1	-0.981213	1	1	X.KLNKKVRRLGLKIALSARAAEG.X	Solyc12g088730.1.1
query:9094;rank:1	-0.981213	1	1	X.VKIQFFKWAGKRRN.X	Solyc12g043100.1.1
query:6926;rank:1	-0.981213	1	1	X.VTAEVLAKLISRLN.X	Solyc06g060100.2.1
query:2362;rank:1	-0.981213	1	1	X.KPTGAVRVSF.X	Solyc07g066480.2.1
query:5218;rank:1	-0.981226	1	1	X.ILSVHGQGRTIVF.X	Solyc09g090740.2.1
query:3999;rank:1	-0.981226	1	1	X.SQVAVMVFSKN.X	Solyc01g066020.1.1
query:960;rank:1	-0.981276	1	1	X.KEKGSMNK.X	Solyc09g074190.1.1
query:17040;rank:1	-0.981321	1	1	X.TINAEQSIIMHIQTISNDNTNMQ.X	Solyc08g062300.1.1
query:10508;rank:1	-0.981321	1	1	X.RLMYRSSSLESPVYK.X	Solyc11g073020.1.1
query:10360;rank:1	-0.981321	1	1	X.TIIKATMLTIVSDATHT.X	Solyc06g073570.2.1
query:12974;rank:1	-0.981351	1	1	X.LPIPSLLTAVESNLRMPLP.X	Solyc02g093770.2.1
query:19538;rank:1	-0.981375	1	1	X.TGIAVSGSKASGSSIMSDGSSLKVPVRAAAG.X	Solyc09g082280.2.1
query:22788;rank:1	-0.981474	1	1	X.KRSSTSNSSTSAKSSNNNTKSQGSSQTTNSGSTSN.X	Solyc10g086440.1.1
query:22274;rank:1	-0.981474	1	1	X.KENYMNKEEQTAVNHFHEKLLKLKDLMKTKAG.X	Solyc02g014720.2.1
query:20893;rank:1	-0.981489	1	1	X.QSRRSSSNSYIGYLFNKLILISTLMFKN.X	Solyc00g032230.1.1
query:12014;rank:1	-0.981489	1	1	X.HLLKRTKKTMTVLVK.X	Solyc09g014340.1.1
query:10357;rank:1	-0.981489	1	1	X.SSTSNGSSSSSWKGG.X	Solyc10g047530.1.1
query:10227;rank:1	-0.981489	1	1	X.SLKKSVNTPVPLSSGK.X	Solyc02g081130.1.1
query:8984;rank:1	-0.981489	1	1	X.QLAEAGAHVVMAVRSTN.X	Solyc03g098460.2.1
query:3682;rank:1	-0.981489	1	1	X.VVTGFIISFVSL.X	Solyc10g076280.1.1
query:21906;rank:1	-0.981573	1	1	X.AKLISDATAAAGMGLIELRRIEASREVAGTLAKTPN.X	Solyc11g013260.1.1
query:11141;rank:1	-0.981573	1	1	X.AVRSGNGLMLKGGKEAKR.X	Solyc08g043170.2.1
query:6584;rank:1	-0.981573	1	1	X.QAGVLSNPNKRGRT.X	Solyc05g012830.1.1
query:18650;rank:1	-0.981607	1	1	X.LDPPTVAMHDGVWKLSLPQEIETLKP.X	Solyc07g006810.2.1
query:12506;rank:1	-0.981607	1	1	X.AMNPPIYHRDIKSSNILL.X	Solyc02g090110.2.1
query:10574;rank:1	-0.981607	1	1	X.AKESAPPVAVTALRTLQS.X	Solyc12g056520.1.1
query:3077;rank:1	-0.981627	1	1	X.RIGRDVLREGG.X	Solyc05g051780.2.1
query:585;rank:1	-0.981627	1	1	X.KDSSASAK.X	Solyc07g065710.2.1
query:9738;rank:1	-0.981672	1	1	X.QSKPPSKRDPPKMQTD.X	Solyc05g051750.2.1
query:6471;rank:1	-0.981672	1	1	X.KRMSAFVSNLSR.X	Solyc10g076730.1.1
query:19817;rank:1	-0.981765	1	1	X.HGQTSVSTKKNVIIGRMPIMLRSSCCVL.X	Solyc10g078860.1.1
query:13904;rank:1	-0.981765	1	1	X.SSLKSVIKPLSSSLVKHN.X	Solyc06g060380.2.1
query:10015;rank:1	-0.981765	1	1	X.LLVAASMPVIQILLITA.X	Solyc12g095750.1.1
query:4727;rank:1	-0.981765	1	1	X.SPHMKKNTPKN.X	Solyc05g055830.2.1
query:3886;rank:1	-0.981765	1	1	X.YTDGIIGLGNGKS.X	Solyc06g009090.1.1
query:2904;rank:1	-0.981765	1	1	X.SPRIFKFEI.X	Solyc12g036510.1.1
query:22591;rank:1	-0.981771	1	1	X.KEMRNLMRLRAAGIRCPAPILLRLHVLVMEFIGKGG.X	Solyc08g080850.2.1
query:13406;rank:1	-0.981797	1	1	X.VSAMLLEKLVAAGIGNRPVVF.X	Solyc04g079280.2.1
query:6065;rank:1	-0.981797	1	1	X.KGKGINGVPVLAKLK.X	Solyc07g066660.2.1
query:23;rank:1	-0.981797	1	1	X.TALIPETG.X	Solyc05g015780.1.1
query:8209;rank:1	-0.98187	1	1	X.TAIMHQPASPRFPPGT.X	Solyc03g006680.2.1
query:19822;rank:1	-0.981893	1	1	X.QVGKKMDHNKKSFARSIKQSVSWVGTK.X	Solyc03g115500.2.1
query:11159;rank:1	-0.981893	1	1	X.PEISLPELSSISLYT.X	Solyc06g075100.2.1
query:21713;rank:1	-0.981904	1	1	X.RSFRPKFSIMSSLYPSIPHFAIEESAVKPSTL.X	Solyc04g074240.2.1
query:12146;rank:1	-0.981904	1	1	X.RSVISANNAREILLAIVF.X	Solyc01g107980.2.1
query:8015;rank:1	-0.981904	1	1	X.KPVSSPSGTRSATTASR.X	Solyc03g096090.2.1
query:20388;rank:1	-0.981969	1	1	X.VSVDPFSLLETIEGYLWPKVSKKKSEKL.X	Solyc09g007310.2.1
query:5661;rank:1	-0.981988	1	1	X.TYEVLLKDKAVLS.X	Solyc12g099910.1.1
query:1984;rank:1	-0.981988	1	1	X.THFKVNIIN.X	Solyc12g020030.1.1
query:22734;rank:1	-0.982042	1	1	X.FKLSIECFKGLGVTLISPRFVFVLGNSIVIILFLKSG.X	Solyc01g109800.2.1
query:20435;rank:1	-0.982042	1	1	X.LHALVIKRGLENVTIISNVLISMYVKSCT.X	Solyc01g090510.2.1
query:17282;rank:1	-0.982042	1	1	X.FFLLGALLNAVVVHISMLIFSRI.X	Solyc01g086770.1.1
query:11559;rank:1	-0.982042	1	1	X.KSQSHPAALTTQRYRVS.X	Solyc06g036240.1.1
query:9188;rank:1	-0.982042	1	1	X.TSSSSNSPSPSPSS.X	Solyc06g053190.2.1
query:4707;rank:1	-0.982042	1	1	X.LQESATGGGIVTY.X	Solyc04g053090.1.1
query:746;rank:1	-0.982042	1	1	X.ISRALTQL.X	Solyc01g105290.2.1
query:21846;rank:1	-0.982069	1	1	X.PKSSGIGTLSGPQFLWGSSPIQSERTDSSV.X	Solyc07g056340.2.1
query:9324;rank:1	-0.982069	1	1	X.SDLTKLESSMGRSA.X	Solyc02g093020.2.1
query:3700;rank:1	-0.982069	1	1	X.GLWVPVSPHPN.X	Solyc05g053340.2.1
query:20253;rank:1	-0.982083	1	1	X.SFVTGIGPSLYKSGKECGACYQVKCTKKMH.X	Solyc03g093390.2.1
query:12570;rank:1	-0.982083	1	1	X.LPLIAKKTPSISASKPPN.X	Solyc02g065050.1.1
query:8692;rank:1	-0.982083	1	1	X.FLRKGKTQEALKLVN.X	Solyc08g076680.1.1
query:16412;rank:1	-0.982168	1	1	X.PEYISVVLKAGIITAMVSLAEGIAI.X	Solyc12g006960.1.1
query:15755;rank:1	-0.982179	1	1	X.QSAETIRKQEYADTLPRASVK.X	Solyc10g051200.1.1
query:6606;rank:1	-0.98218	1	1	X.KQTFSQNAAASSIF.X	Solyc07g056220.2.1
query:4678;rank:1	-0.98218	1	1	X.QSGSGRPYRTHQ.X	Solyc12g099910.1.1
query:350;rank:1	-0.98218	1	1	X.KVLALRGS.X	Solyc07g006810.2.1
query:18799;rank:1	-0.982267	1	1	X.QKGFVNLRATRTLRPTKCSLSASRPAS.X	Solyc03g005230.2.1
query:18421;rank:1	-0.982274	1	1	X.ISIMLLAKLGKPLMGTARIVVNSIHI.X	Solyc03g119440.2.1
query:6534;rank:1	-0.982274	1	1	X.AKVAYTALTKCKSI.X	Solyc01g009190.1.1
query:3093;rank:1	-0.982274	1	1	X.NSKAAEESMAN.X	Solyc01g096140.2.1
query:20251;rank:1	-0.982318	1	1	X.KPFILTSAMQKGYEMVFLAFSQRWPV.X	Solyc04g072270.1.1
query:12860;rank:1	-0.982318	1	1	X.AKGSGGGGSMKAPGGGGAYISRGG.X	Solyc05g008410.1.1
query:4584;rank:1	-0.982318	1	1	X.SGQKLSSLLRL.X	Solyc01g104040.2.1
query:5987;rank:1	-0.982366	1	1	X.SYSSSASIGNSVN.X	Solyc03g006790.1.1
query:17900;rank:1	-0.982369	1	1	X.MAIGMKQMSMIIATLGVLSFIFGVIA.X	Solyc08g006000.2.1
query:11899;rank:1	-0.982369	1	1	X.THFKVPLNIGKRGGKKDM.X	Solyc07g009470.1.1
query:19160;rank:1	-0.982456	1	1	X.NLPSLGATIYASRFAANALRALRRNHP.X	Solyc01g095770.2.1
query:21819;rank:1	-0.982465	1	1	X.LRTLAKPHYLRHPQPPPSFISLRLLSFATPE.X	Solyc03g083280.2.1
query:2083;rank:1	-0.982465	1	1	X.KDVLPNGSRL.X	Solyc04g056660.1.1
query:22780;rank:1	-0.982465	1	1	X.IMTVTMTMTTITTTMMIMMAMTIRTSTTTMN.X	Solyc01g018050.1.1
query:22511;rank:1	-0.982465	1	1	X.LVVATSGTGYILGSGSAIDYMGLCCTCAGTMMVAASA.X	Solyc01g080860.2.1
query:8344;rank:1	-0.982465	1	1	X.FTISSGDCKSSAN.X	Solyc01g006930.2.1
query:7368;rank:1	-0.982465	1	1	X.SLQKLGRLTDAARE.X	Solyc06g069080.2.1
query:23360;rank:1	-0.98256	1	1	X.PPYGTPDATVKMNMMLSSLRGLSNLTYTFHGKGVFLLASQCP.X	Solyc03g116840.1.1
query:16507;rank:1	-0.98256	1	1	X.RRSYPVAYRLYMELLKIYAF.X	Solyc09g064780.2.1
query:21395;rank:1	-0.982594	1	1	X.AVAMAIALVFFFSGTRLYRLQPPAGSPLTRIF.X	Solyc09g014220.2.1
query:20397;rank:1	-0.982594	1	1	X.LCSVERVESLKALIRIIPMWSTGLMVFV.X	Solyc05g005960.2.1
query:19054;rank:1	-0.982594	1	1	X.TEVAALVELNMLKNLTGSAMAGALGGFNAH.X	Solyc02g038740.2.1
query:17733;rank:1	-0.982594	1	1	X.SGRSNLSGKGRSQVPTQKLSKSRE.X	Solyc04g057880.2.1
query:7527;rank:1	-0.982594	1	1	X.VLTALEESVQLVNSA.X	Solyc07g042910.2.1
query:5587;rank:1	-0.982594	1	1	X.MKLMIFFIIAQN.X	Solyc12g038830.1.1
query:5576;rank:1	-0.982594	1	1	X.DLLNAAGETYSVTL.X	Solyc04g082010.1.1
query:18126;rank:1	-0.982655	1	1	X.LMVLSISTFLIGSPLYIKVKTDTN.X	Solyc05g005960.2.1
query:17496;rank:1	-0.982655	1	1	X.TVDRPVIARVEALEGLSFNFVLEK.X	Solyc07g038000.1.1
query:17199;rank:1	-0.982663	1	1	X.DLKQTINSLHVNLVKSEISTLGS.X	Solyc02g076920.2.1
query:9990;rank:1	-0.982663	1	1	X.PPPPPPPKLMAKTTSGMV.X	Solyc02g069560.2.1
query:18110;rank:1	-0.982732	1	1	X.AVGYSCVVFGWMTILSVKQPSSKLN.X	Solyc06g053370.1.1
query:14878;rank:1	-0.982732	1	1	X.NVSMIRKIIMKQDVESTPMN.X	Solyc02g071550.1.1
query:9464;rank:1	-0.982732	1	1	X.PVIPSPPPLIPSPPIVN.X	Solyc03g117190.1.1
query:1114;rank:1	-0.982732	1	1	X.KYDIVVNI.X	Solyc10g006980.2.1
query:1061;rank:1	-0.982732	1	1	X.KDSQDSLS.X	Solyc03g006820.2.1
query:13222;rank:1	-0.98275	1	1	X.TYTKPKKIKHKKKKVKLA.X	Solyc12g098940.1.1
query:8096;rank:1	-0.98275	1	1	X.DKFRVGSQFFVITR.X	Solyc06g073970.1.1
query:10262;rank:1	-0.982762	1	1	X.YLFLLVLTFFTLQTS.X	Solyc07g006660.1.1
query:8752;rank:1	-0.982762	1	1	X.RGRGTGYTMKGHVNVD.X	Solyc12g017520.1.1
query:1267;rank:1	-0.982762	1	1	X.SSVVLISSIS.X	Solyc04g014670.2.1
query:15292;rank:1	-0.982861	1	1	X.KGKLIKTTILTMELLLLSTGF.X	Solyc03g098490.1.1
query:9706;rank:1	-0.982861	1	1	X.LKSFSGHIKAPVPSPI.X	Solyc06g082450.1.1
query:9081;rank:1	-0.982861	1	1	X.DQRLLREKVLNISGG.X	Solyc01g103990.2.1
query:3461;rank:1	-0.982861	1	1	X.LFRSLLTHL.X	Solyc05g016440.2.1
query:13529;rank:1	-0.982941	1	1	X.TNDKVLQKVSSNSTLECGN.X	Solyc08g079760.2.1
query:20130;rank:1	-0.98296	1	1	X.MKRTTSMTEFTLDLNLNNPDPNSS.X	Solyc04g072780.2.1
query:14867;rank:1	-0.98296	1	1	X.IKSQGGKILTGGSVVESEGNFV.X	Solyc03g122310.2.1
query:10957;rank:1	-0.98296	1	1	X.PVWEVAVRNNQSQTLQ.X	Solyc07g042430.1.1
query:9364;rank:1	-0.98296	1	1	X.TNGTFSALKDALGSLKT.X	Solyc11g011480.1.1
query:5731;rank:1	-0.98296	1	1	X.RFTIRDASKVVN.X	Solyc02g090600.1.1
query:19424;rank:1	-0.983009	1	1	X.GLTVQVPKHIVEGDKIIVNTIDHSYM.X	Solyc01g044490.2.1
query:18314;rank:1	-0.983009	1	1	X.RWSLKQFNLNIFLPLPSVQGVNAE.X	Solyc07g032620.1.1
query:18232;rank:1	-0.983009	1	1	X.KATGDGAKRVRHRERTRAGPAPDANA.X	Solyc01g098160.2.1
query:7993;rank:1	-0.983009	1	1	X.KQVSGSKKGNVNLNSQ.X	Solyc02g069140.1.1
query:3802;rank:1	-0.983009	1	1	X.QDSMESSYT.X	Solyc11g011260.1.1
query:6987;rank:1	-0.983059	1	1	X.TYLQERAIVTPKN.X	Solyc12g038210.1.1
query:20241;rank:1	-0.983132	1	1	X.CEVDSRTSPSLSMQPSVTGGTGMYT.X	Solyc11g071500.1.1
query:18203;rank:1	-0.983132	1	1	X.PTQDKQALLAFLSQIRHANRVQWN.X	Solyc03g111670.2.1
query:15541;rank:1	-0.983132	1	1	X.IPVIGSTESETPGSTSSKLR.X	Solyc08g068110.1.1
query:11328;rank:1	-0.983132	1	1	X.LDELGDKTAIVFINTKK.X	Solyc02g081290.2.1
query:8493;rank:1	-0.983132	1	1	X.ILLKLLNGMKSGVKPT.X	Solyc05g005580.2.1
query:3041;rank:1	-0.983132	1	1	X.QPLVSVMSLR.X	Solyc05g014160.2.1
query:19110;rank:1	-0.983147	1	1	X.LGKSKHNSIEGEVPSDIGGLKAIVRLH.X	Solyc04g014650.2.1
query:13258;rank:1	-0.983147	1	1	X.RQINGHRTAPSTVKKRLK.X	Solyc09g091480.2.1
query:8056;rank:1	-0.983147	1	1	X.TYNEGETGIAVKGLIE.X	Solyc03g111990.2.1
query:1105;rank:1	-0.983147	1	1	X.ENVIISSSN.X	Solyc06g060140.2.1
query:19107;rank:1	-0.983158	1	1	X.KAWKMMNMAKAIEQNSVGNKSSVQASK.X	Solyc06g069360.2.1
query:6880;rank:1	-0.983158	1	1	X.TYNSIAVKGSNGHP.X	Solyc01g086830.2.1
query:6082;rank:1	-0.983158	1	1	X.KRKIGLAKKWNT.X	Solyc09g074240.1.1
query:20180;rank:1	-0.983257	1	1	X.AFGLLSKSLPQSKLVFIDIYNLVTDFIVN.X	Solyc06g048670.2.1
query:11225;rank:1	-0.983257	1	1	X.PYRRRFLLLRAPFLR.X	Solyc01g104620.2.1
query:9139;rank:1	-0.983257	1	1	X.GFMSHCGWTSCLES.X	Solyc07g043440.1.1
query:7280;rank:1	-0.983257	1	1	X.AGPMCVLPLYAMLPAS.X	Solyc01g095710.2.1
query:4557;rank:1	-0.983257	1	1	X.GNLVGVLPASAIFV.X	Solyc12g056660.1.1
query:3900;rank:1	-0.983257	1	1	X.PLVQGMSGKGLL.X	Solyc09g082500.2.1
query:6007;rank:1	-0.983285	1	1	X.LLAALSEGTTVVDNL.X	Solyc05g050980.2.1
query:1723;rank:1	-0.983285	1	1	X.TYTAKWKGT.X	Solyc01g005030.2.1
query:480;rank:1	-0.983285	1	1	X.KPSRLT.X	Solyc05g053600.2.1
query:18052;rank:1	-0.983322	1	1	X.NKKIEKFQSEEQQQTEDELQDK.X	caseinbeta
query:16044;rank:1	-0.983322	1	1	X.HFFFSLIFIFSLSFQPISS.X	Solyc11g020230.1.1
[truncated: 4,847 more rows]

## Sheet: decoy sequences
PSMId	score	q-value	posterior_error_prob	peptide	proteinIds
query:18103;rank:1	-0.677432	0.0307692	0.0730838	X.KLTAGQLFADFFVSSHSSLYTVA.X	DECOY1_Solyc09g010570_25256
query:23550;rank:1	-0.7234	0.038835	0.0730838	X.DFVSIGNAVTFAMVVQKDILPAGLGQMEPASRCSDVRAVMVKS.X	DECOY0_Solyc02g079500_7011
query:22961;rank:1	-0.72658	0.038835	0.0730838	X.YTTSIAPSQSADSTTVQNQTTRGQGVVTRLGGRKKAAN.X	DECOY1_Solyc04g014580_12438
query:20831;rank:1	-0.802061	0.0471698	0.149723	X.KRTNLSLPQSPSTPTSNSLSHATPSP.X	DECOY1_Solyc03g118700_11442
query:15456;rank:1	-0.804945	0.0560748	0.293139	X.HLFLADLSLPFRRKIIFCVF.X	DECOY0_Solyc08g028760_22997
query:13289;rank:1	-0.807985	0.0619469	0.293139	X.AGAVSAGAGDGMSDMGGTGPGKII.X	DECOY0_Solyc11g066100_31723
query:16866;rank:1	-0.814339	0.0695652	0.293139	X.RYLNKRKVPGVVGARTILFAERA.X	DECOY0_Solyc12g096450_34435
query:17363;rank:1	-0.822351	0.0756303	0.293139	X.LWRNGSLTSNSSFRLHSLNGN.X	DECOY1_Solyc08g029410_23058
query:8477;rank:1	-0.831385	0.0833333	0.293139	X.QETVVVKEVTSST.X	DECOY0_Solyc07g005700_19923
query:22620;rank:1	-0.833402	0.0916667	0.293139	X.MSDGICSNLLGKAKNREKVISAEIITDLLGFPASMI.X	DECOY1_Solyc10g083430_29528
query:3685;rank:1	-0.833541	0.0991736	0.293139	X.ETLQLLTLSIA.X	DECOY0_Solyc03g031910_9121
query:14844;rank:1	-0.837408	0.106557	0.293139	X.RSGAAKLIRKLERLTSINKK.X	DECOY0_Solyc08g076300_24105
query:23091;rank:1	-0.837547	0.111111	0.293139	X.GTFRFSLTADKSLKFGDLKISRKRQGVIYKMIINDVLP.X	DECOY0_Solyc02g080980_7159
query:10966;rank:1	-0.840697	0.113636	0.293139	X.LTVSACIGGALFFAYLGVF.X	DECOY0_Solyc00g125990_681
query:6094;rank:1	-0.843769	0.120301	0.293139	X.SLPARDIASSTS.X	DECOY1_Solyc02g092760_8328
query:4021;rank:1	-0.848322	0.12782	0.293139	X.TYRRGLKYLH.X	DECOY0_Solyc12g099920_34683
query:7079;rank:1	-0.84846	0.130435	0.293139	X.GKSMKVFTKGHRIN.X	DECOY1_Solyc06g066130_18710
query:20545;rank:1	-0.853985	0.134752	0.293139	X.HIQPCFFEISEMISLLTKRGYEIAPLLGGG.X	DECOY0_Solyc05g018510_15753
query:14859;rank:1	-0.855558	0.141844	0.293139	X.SPYSMSSSAQEASQTNTIADN.X	DECOY0_Solyc03g114670_11041
query:19019;rank:1	-0.856334	0.148936	0.293139	X.SAVYVNILIYVIAVAMVLVVNIYLILV.X	DECOY1_Solyc12g062970_34086
query:21816;rank:1	-0.858034	0.15493	0.293139	X.SNSVDTMTQSMASCINNSTMPTWPSDTY.X	DECOY0_Solyc12g014350_32883
query:20016;rank:1	-0.858682	0.160839	0.293139	X.SRSSTSMNCNSLTTISSTPLRGHN.X	DECOY0_Solyc02g090220_8077
query:13216;rank:1	-0.860193	0.163265	0.293139	X.RAVMSPPSRSGGQQTSSN.X	DECOY0_Solyc07g055140_21699
query:1235;rank:1	-0.861859	0.165563	0.293139	X.PQGVMGPDGN.X	DECOY1_Solyc02g032720_5638
query:20931;rank:1	-0.862688	0.168831	0.293139	X.RAIIDPTSVVDCIGSDTVVSNYCNTQTTNK.X	DECOY0_Solyc07g054710_21657
query:20948;rank:1	-0.863814	0.173077	0.293139	X.RLAMASAHSVERQQRDATIKRVIKSQGLPE.X	DECOY0_Solyc01g049960_2067
query:17532;rank:1	-0.865313	0.176101	0.293139	X.CTGSWHANMVPNKHTKGIRIMSWG.X	DECOY0_Solyc02g005560_5229
query:17843;rank:1	-0.866971	0.18239	0.293139	X.LQVEAVPEKTSAGLIVIGKLVMIATLG.X	DECOY1_Solyc10g079300_29216
query:2469;rank:1	-0.86804	0.184049	0.293139	X.KNTAENMPKN.X	DECOY0_Solyc05g016360_15647
query:12657;rank:1	-0.869319	0.189024	0.293139	X.AAKKLQRTRGNPIPLICCK.X	DECOY0_Solyc02g005350_5209
query:12722;rank:1	-0.869526	0.193939	0.293139	X.NLPLTGNNIPPIGNHSFLQA.X	DECOY1_Solyc07g037960_20818
query:2876;rank:1	-0.870562	0.2	0.293139	X.QPEPFTKIVR.X	DECOY1_Solyc06g082070_19598
query:1707;rank:1	-0.870616	0.206061	0.293139	X.TYVVLLTSGT.X	DECOY0_Solyc02g082120_7273
query:22962;rank:1	-0.870839	0.212121	0.293139	X.ARENKKGTGKDPSVPKYASDGKNKQTLSAGPKKKAAN.X	DECOY0_Solyc07g045340_21229
query:4809;rank:1	-0.871247	0.216867	0.293139	X.KEPGVAIAYVTHV.X	DECOY0_Solyc04g082500_14571
query:9916;rank:1	-0.8723	0.221557	0.293139	X.KKSSHTTVRQYDVGVA.X	DECOY1_Solyc11g008550_30214
query:20685;rank:1	-0.872868	0.225434	0.293139	X.IPFISKSGLSYAYFPTSAGKHMQVPSVELG.X	DECOY1_Solyc04g049120_13068
query:7261;rank:1	-0.873291	0.225434	0.293139	X.QPMAPPPASMQMAQD.X	DECOY1_Solyc05g005620_14684
query:16802;rank:1	-0.876088	0.231214	0.293139	X.LSIMLLVCLMVAFIKVGIMVIIF.X	DECOY0_Solyc05g055410_16921
query:21887;rank:1	-0.876263	0.236994	0.293139	X.FRMLSTELVALSHNDRLEPLVLSDIKSQIDQV.X	DECOY1_Solyc02g014730_5344
query:17445;rank:1	-0.87656	0.241379	0.293139	X.PLNPRPMGSLFLGQHRSSLNINTQ.X	DECOY0_Solyc12g035670_33287
query:23297;rank:1	-0.877746	0.247126	0.293139	X.KSGTLKESMNNTSVEQISLSGNSAVATLLADEKSDM.X	DECOY1_Solyc03g113660_10940
query:19893;rank:1	-0.877884	0.252874	0.293139	X.ARLIPVAPVGRLLKAELLGSMPALIDMHGQ.X	DECOY1_Solyc11g008390_30198
query:5687;rank:1	-0.878022	0.258621	0.293139	X.YTRISLKEALSVT.X	DECOY0_Solyc09g056430_26011
query:17472;rank:1	-0.878298	0.264368	0.293139	X.SGYDMNSLRSTRILSTSSMY.X	DECOY1_Solyc10g079240_29210
query:10152;rank:1	-0.879265	0.270115	0.293139	X.YTKGVVMIIKGIAGTPII.X	DECOY1_Solyc08g015670_22804
query:20993;rank:1	-0.879348	0.274286	0.293139	X.HALFHAEPKSFFFPDLDMEVTLLRSLHL.X	DECOY0_Solyc03g120770_11649
query:9090;rank:1	-0.879818	0.274725	0.293139	X.ITVVRGPILINDFIQ.X	DECOY1_Solyc12g098870_34578
query:5389;rank:1	-0.88037	0.274725	0.293139	X.AVLKTELFQLEGP.X	DECOY0_Solyc03g114730_11047
query:16899;rank:1	-0.881613	0.277487	0.293139	X.EPQLLREVSGIARKFPMPPLARL.X	DECOY0_Solyc01g094550_3497
query:17655;rank:1	-0.882304	0.277487	0.293139	X.RKTTMSIQVAVPVIAVELIKKRSS.X	DECOY1_Solyc09g011390_25338
query:6997;rank:1	-0.884376	0.277487	0.293139	X.LLITVLPYQHLGVM.X	DECOY1_Solyc11g033250_31062
query:17948;rank:1	-0.885758	0.283505	0.293139	X.TGNMSPAKRKIVFPKVLLTKHGTP.X	DECOY1_Solyc02g077740_6836
query:6100;rank:1	-0.885758	0.283505	0.293139	X.RKLASLAREWDT.X	DECOY0_Solyc03g025530_8983
query:23008;rank:1	-0.886496	0.287179	0.293139	X.MMTMTMMMMTMTMMMMKTTMMTMMETTMMT.X	DECOY1_Solyc12g032910_33222
query:22299;rank:1	-0.886686	0.290816	0.293139	X.LMLLALRLGNLRAQPQGTIMIDSKRNLLAGKFKSG.X	DECOY1_Solyc10g007550_27570
query:4431;rank:1	-0.887139	0.295918	0.293139	X.KKVAGDDELATIS.X	DECOY0_Solyc11g068690_31883
query:17170;rank:1	-0.887139	0.30102	0.293139	X.LHMVIIRSNMKEGQNRRLKLTI.X	DECOY0_Solyc07g056230_21803
query:20367;rank:1	-0.887415	0.304569	0.293139	X.RYDIFPILPKSRKMLEKLNIKISKAQA.X	DECOY1_Solyc11g013570_30614
query:455;rank:1	-0.888106	0.306533	0.293139	X.HTAAHPQP.X	DECOY0_Solyc11g012280_30485
query:8465;rank:1	-0.888797	0.311558	0.293139	X.LPDKVFVVLCAMFNN.X	DECOY0_Solyc11g005310_29893
query:1949;rank:1	-0.889211	0.31441	0.293139	X.SGGGVMVSKDE.X	DECOY1_Solyc09g009140_25114
query:4038;rank:1	-0.889626	0.31441	0.293139	X.STGGGGGTASFIG.X	DECOY0_Solyc11g069750_31989
query:6852;rank:1	-0.889764	0.31441	0.293139	X.TANIASLAWVLDATR.X	DECOY1_Solyc02g055330_5794
query:17110;rank:1	-0.890178	0.31441	0.293139	X.SSGRLTFFKGCRNTTVGSLVN.X	DECOY1_Solyc06g061250_18422
query:6567;rank:1	-0.891421	0.31441	0.293139	X.NSPRIASVQISVF.X	DECOY0_Solyc01g091180_3359
query:21875;rank:1	-0.892786	0.31441	0.293139	X.VWTGDLAAKNMAGKVKIATRGKTLATVTGAMILN.X	DECOY0_Solyc03g083770_10169
query:16520;rank:1	-0.892803	0.31441	0.293139	X.STGLTQIHIEGSLENSNHGPAS.X	DECOY1_Solyc00g171810_758
query:16095;rank:1	-0.892808	0.31441	0.293139	X.MTLAVGMNVTIVIFMVQTRSPS.X	DECOY1_Solyc06g063240_18522
query:23684;rank:1	-0.893739	0.31441	0.293139	X.TMTMMMTTTTMMTMMKTLTDMTMLMTDDDMDDMDTAIL.X	DECOY0_Solyc00g006050_37
query:16191;rank:1	-0.894322	0.31441	0.293139	X.SSRSAFGLAKSSSTLCGVVAL.X	DECOY1_Solyc01g006820_1070
query:16358;rank:1	-0.896395	0.316017	0.66759	X.SAGTKKLLTMQELLEKSKHIM.X	DECOY0_Solyc07g047940_21287
query:11442;rank:1	-0.896947	0.318966	0.66759	X.LSPTEEASGQTLSSHASQGL.X	DECOY0_Solyc07g065260_22205
query:19993;rank:1	-0.897085	0.321888	0.66759	X.QPLMLREGSKAAVPWNFRIERLEVSAAN.X	DECOY1_Solyc02g078860_6948
query:9721;rank:1	-0.897223	0.32618	0.66759	X.QSQKLNVNLECQDLQ.X	DECOY1_Solyc04g078160_14142
query:2927;rank:1	-0.897362	0.330472	0.66759	X.TIATETPMD.X	DECOY1_Solyc11g066210_31734
query:20534;rank:1	-0.8975	0.333333	0.66759	X.TFILTLLLMTLFTKLTLTTLLTILMLLK.X	DECOY1_Solyc01g018000_1874
query:1121;rank:1	-0.898467	0.333333	0.66759	X.KESVSMLR.X	DECOY1_Solyc06g065360_18634
query:11857;rank:1	-0.899445	0.337553	0.66759	X.LTLALALYLIIEVLRKN.X	DECOY1_Solyc11g045030_31322
query:15862;rank:1	-0.899742	0.341667	0.66759	X.REGNEVATFRSTKILATDSVK.X	DECOY1_Solyc07g047860_21280
query:19678;rank:1	-0.899838	0.341667	0.66759	X.AERELGLVVVQIIKIIKCHKSPETPFV.X	DECOY0_Solyc12g098680_34559
query:3881;rank:1	-0.900401	0.345833	0.66759	X.YTNSTSSLVSGV.X	DECOY0_Solyc05g052980_16679
query:10967;rank:1	-0.900436	0.348548	0.66759	X.LTMNYLANIVNKIIKKG.X	DECOY0_Solyc08g083060_24773
query:13832;rank:1	-0.900677	0.349794	0.66759	X.LFGSFKQRIGAHKIYVGYM.X	DECOY1_Solyc04g071430_13670
query:20308;rank:1	-0.900815	0.353909	0.66759	X.SISGGLMEDHQASLETHGKNQTIILSN.X	DECOY1_Solyc01g097110_3752
query:14051;rank:1	-0.901091	0.356275	0.66759	X.DPGTGTVYEWVVGTRLIKGRG.X	DECOY0_Solyc04g009410_12221
query:2765;rank:1	-0.901091	0.356275	0.66759	X.TCVHVWSFLI.X	DECOY0_Solyc07g064260_22107
query:2507;rank:1	-0.901644	0.35743	0.66759	X.LNVGEGLFAVF.X	DECOY0_Solyc09g005250_24831
query:16323;rank:1	-0.90192	0.36	0.66759	X.KALKMMVAKKSNMRLHGDSAVF.X	DECOY1_Solyc04g076860_14012
query:8148;rank:1	-0.902058	0.36255	0.66759	X.GNMRTLRDMHPSN.X	DECOY0_Solyc05g055070_16887
query:21561;rank:1	-0.902221	0.366534	0.66759	X.DPSRYSGIVLQDVEKQTMSVYNDVDELKEN.X	DECOY0_Solyc11g067120_31825
query:4841;rank:1	-0.902335	0.369048	0.66759	X.KEINSGDSVRTT.X	DECOY0_Solyc04g012050_12383
query:8137;rank:1	-0.902611	0.373016	0.66759	X.ISVLFTSVLTILAVF.X	DECOY0_Solyc05g055510_16931
query:15964;rank:1	-0.902615	0.375494	0.66759	X.KKGNSMSTNSTSQSSKSKE.X	DECOY0_Solyc04g054350_13371
query:9403;rank:1	-0.903025	0.379447	0.66759	X.KVDIVPVGVLLIGDASGR.X	DECOY1_Solyc01g094280_3470
query:12633;rank:1	-0.903163	0.380392	0.66759	X.FASKCKHCTVNRSWFFF.X	DECOY1_Solyc10g086120_29796
query:20239;rank:1	-0.903302	0.381323	0.66759	X.GQGTNPTVHNRWLWVEDLVQLMKSFM.X	DECOY0_Solyc09g063080_26265
query:22115;rank:1	-0.903716	0.384615	0.66759	X.SSGGTRAGSSGNGRSGAEESAGGSGYSSGARSGNCAGG.X	DECOY0_Solyc00g058890_503
query:5982;rank:1	-0.903716	0.384615	0.66759	X.ISLRKRVAELVF.X	DECOY0_Solyc03g082680_10061
query:5638;rank:1	-0.903992	0.385455	0.66759	X.KIEEQSKELKQN.X	DECOY1_Solyc12g016150_32962
query:12627;rank:1	-0.904407	0.385455	0.66759	X.GGPGPTKKKGRACLNQMIR.X	DECOY1_Solyc05g055080_16888
query:2586;rank:1	-0.904498	0.385455	0.66759	X.KSLDFIRSTN.X	DECOY1_Solyc07g015920_20344
query:12791;rank:1	-0.905236	0.385455	0.66759	X.MLECKVKIRSRAPHKNVT.X	DECOY1_Solyc10g009310_27744
query:18568;rank:1	-0.905556	0.385455	0.66759	X.DGFFISIVKNTIFLNINLRTVTNT.X	DECOY0_Solyc01g013770_1557
query:15741;rank:1	-0.905885	0.385455	0.66759	X.KLGLGVTLSEYSVVLDYKVM.X	DECOY0_Solyc07g039340_20847
query:3091;rank:1	-0.906893	0.387681	0.66759	X.SINIGQSNGIIN.X	DECOY1_Solyc10g080900_29374
query:14815;rank:1	-0.907031	0.391304	0.824047	X.VSNMKPKLKIIDFVAFLSLT.X	DECOY0_Solyc05g024370_15923
query:22239;rank:1	-0.907081	0.394928	0.824047	X.TMTMMMMTMTMMMMKTTMMTMMITTMMT.X	DECOY1_Solyc12g032910_33222
query:3443;rank:1	-0.907173	0.395683	0.824047	X.DISINISLRM.X	DECOY0_Solyc09g082250_26781
query:15559;rank:1	-0.907722	0.396429	0.824047	X.IQEAKHDFPIVTALLKNVDTN.X	DECOY1_Solyc08g014530_22790
query:8623;rank:1	-0.908262	0.398577	0.824047	X.ARLSSWAPLTPLALFV.X	DECOY0_Solyc01g068070_2653
query:18078;rank:1	-0.90832	0.400709	0.824047	X.TLKIFITLNLMVVILLLFNVDAAH.X	DECOY1_Solyc10g062320_28914
query:15437;rank:1	-0.908551	0.404255	0.824047	X.KISILIQTIVVARAVVAAQLDM.X	DECOY1_Solyc01g103990_4336
query:13119;rank:1	-0.908796	0.40493	0.824047	X.GSNVLGMLQASLGLGQSELLGN.X	DECOY0_Solyc01g102680_4207
query:3262;rank:1	-0.908965	0.409091	0.824047	X.SSSTYSIT.X	DECOY0_Solyc09g082190_26775
query:2842;rank:1	-0.908965	0.409091	0.824047	X.LNLLKNSTVPN.X	DECOY1_Solyc05g039950_16076
query:3666;rank:1	-0.909242	0.412587	0.824047	X.SKIAVAGSLGMVF.X	DECOY1_Solyc03g118580_11432
query:13314;rank:1	-0.909273	0.416084	0.824047	X.IDLFNYASLQGQEIAMPGK.X	DECOY0_Solyc08g080170_24485
query:21659;rank:1	-0.90938	0.423077	0.824047	X.LLNSSNSKIYSPCTTFVTLITTGPLSGSSKRSKI.X	DECOY0_Solyc09g011380_25337
query:4201;rank:1	-0.90938	0.423077	0.824047	X.SGYQKVRSKLR.X	DECOY0_Solyc09g065470_26401
query:20120;rank:1	-0.909463	0.425087	0.824047	X.FPTTFNSSLNSPSETKAPSSGASIINSSS.X	DECOY1_Solyc02g069660_6426
query:10550;rank:1	-0.909847	0.428571	0.824047	X.LIKRGNCCLKLVTLTY.X	DECOY1_Solyc06g074490_19342
query:2036;rank:1	-0.909947	0.428571	0.824047	X.GLKKHPVLSL.X	DECOY0_Solyc04g028470_12915
query:6966;rank:1	-0.910244	0.428571	0.824047	X.NPIPPKGTTKKEKSS.X	DECOY0_Solyc02g078030_6865
query:13117;rank:1	-0.910541	0.428571	1	X.IQVEAVVPSASSPCENPTIG.X	DECOY1_Solyc11g068820_31896
query:11427;rank:1	-0.910798	0.428571	1	X.IEKDLIKRKSDISKKN.X	DECOY1_Solyc07g052400_21432
query:20031;rank:1	-0.911274	0.428571	1	X.PAPPRIEHQLYTQIARTGSRCTKQLW.X	DECOY1_Solyc00g033890_430
query:5208;rank:1	-0.911928	0.428571	1	X.PINGLTSQKLIY.X	DECOY1_Solyc05g007230_14844
query:17245;rank:1	-0.912324	0.431894	1	X.LMKLAQTGELCSVKLRSPREKV.X	DECOY1_Solyc07g005570_19910
query:23377;rank:1	-0.912522	0.438538	1	X.KRSDHEKLGFKLGMWTQVWQIARNTGLYAVASFSQMRF.X	DECOY1_Solyc06g008820_17322
query:2905;rank:1	-0.912522	0.438538	1	X.HTYLLQAAVSN.X	DECOY0_Solyc06g063190_18517
query:7387;rank:1	-0.912557	0.44186	1	X.KKNRFPAIHVTLSK.X	DECOY1_Solyc05g041530_16134
query:2956;rank:1	-0.912695	0.445183	1	X.KVHVILLVWD.X	DECOY0_Solyc00g164680_743
query:19466;rank:1	-0.912799	0.448505	1	X.ILLVNLSIKYPEILKLFSDMSSSLKQL.X	DECOY1_Solyc04g047820_13038
query:17911;rank:1	-0.912919	0.450331	1	X.MLPVRPQLELQYPEKAGIVLAPAVAG.X	DECOY1_Solyc10g005530_27368
query:14488;rank:1	-0.913018	0.453642	1	X.RVSRVRLTLDRIVIPRGHV.X	DECOY0_Solyc09g010740_25273
query:17313;rank:1	-0.91311	0.453947	1	X.TLSIDLASTYLITTLSASRGN.X	DECOY0_Solyc07g008520_20205
query:6875;rank:1	-0.913386	0.455738	1	X.PAGSLHFPVSLGAFGF.X	DECOY1_Solyc03g005410_8570
query:4421;rank:1	-0.913414	0.457516	1	X.LITTALVSEPTSI.X	DECOY0_Solyc04g050520_13201
query:6855;rank:1	-0.913662	0.457792	1	X.SRIVTHFKRIVFV.X	DECOY0_Solyc06g035960_17727
query:21919;rank:1	-0.914107	0.459547	1	X.MVILFDGARSSGILHVLEILIFLLTGWSKISGPT.X	DECOY0_Solyc10g006120_27427
query:21895;rank:1	-0.914353	0.459877	1	X.NSQKIEVEFRKVVIESGLQASIVIELTLICVNN.X	DECOY0_Solyc11g008540_30213
query:20225;rank:1	-0.914353	0.459877	1	X.TVLSKLFAFASVRITNSLKERIHSPRIP.X	DECOY1_Solyc11g066890_31802
query:10;rank:1	-0.914491	0.459877	1	X.KNGGGATD.X	DECOY0_Solyc11g067200_31833
query:17297;rank:1	-0.914705	0.459877	1	X.QVSFPLHLILFQLQSISVFFLPV.X	DECOY0_Solyc02g093650_8417
query:2634;rank:1	-0.915467	0.459877	1	X.TSSGMTST.X	DECOY1_Solyc11g005380_29900
query:16811;rank:1	-0.915849	0.459877	1	X.ARIKSPPIGYWVEVKRFLILVN.X	DECOY1_Solyc11g005200_29882
query:20562;rank:1	-0.916287	0.459877	1	X.SLRINTGNLTNPQKLLNDISGMLFNLTSAI.X	DECOY1_Solyc10g054290_28716
query:23476;rank:1	-0.916802	0.462963	1	X.RSNILVKALGDPSPAMVAPALMVELNNHVANFVAITNVVMRLA.X	DECOY0_Solyc02g081360_7197
query:4904;rank:1	-0.917116	0.467692	1	X.YAVEKTGTKAFV.X	DECOY0_Solyc12g014090_32857
query:2322;rank:1	-0.917116	0.467692	1	X.AAMGLMLDSVN.X	DECOY0_Solyc01g016670_1741
query:8941;rank:1	-0.917179	0.470769	1	X.LKLIEVKLIRTPTKN.X	DECOY1_Solyc09g005940_24900
query:9196;rank:1	-0.917254	0.470948	1	X.DSSTTAEGASTTVKN.X	DECOY0_Solyc09g010820_25281
query:22865;rank:1	-0.917278	0.473214	1	X.AHGKTDETSSPAISSTQTITDSASLTISTAKGDLKN.X	DECOY1_Solyc06g051710_18072
query:17780;rank:1	-0.917392	0.473214	1	X.GGSSKVKGATLLKLMKRSRSRRGSN.X	DECOY0_Solyc09g090480_27007
query:4637;rank:1	-0.917392	0.473214	1	X.IAKDLMLPAKAT.X	DECOY0_Solyc08g080890_24557
query:8313;rank:1	-0.917659	0.473214	1	X.SCIGKLKGTNKAATKN.X	DECOY1_Solyc06g063200_18518
query:18938;rank:1	-0.917944	0.473214	1	X.AGTVTDHILTKSPTIYNASGITFS.X	DECOY0_Solyc08g080010_24469
query:17043;rank:1	-0.918359	0.47619	1	X.RQEARRQERRLESIQLRISQ.X	DECOY0_Solyc06g068740_18869
query:22075;rank:1	-0.918422	0.479167	1	X.HRAKNTSSTFIQLGHEKIGVTYMFTMPSASPENP.X	DECOY0_Solyc04g076230_13949
query:14487;rank:1	-0.918497	0.480712	1	X.SSAMLLNRVILEERGRAILT.X	DECOY0_Solyc12g036150_33335
query:16563;rank:1	-0.918635	0.482353	1	X.FMRKGLEGGNVGASDPVLSMRHPT.X	DECOY0_Solyc03g026070_9037
query:12913;rank:1	-0.918764	0.482353	1	X.SLLLLLLLIMTKRKKKK.X	DECOY1_Solyc04g077360_14062
query:4849;rank:1	-0.919061	0.482558	1	X.PFDIGAARSTATT.X	DECOY1_Solyc05g053130_16694
query:8871;rank:1	-0.919259	0.482558	1	X.IPGPANFLHCAMIGRF.X	DECOY0_Solyc09g090000_26959
query:723;rank:1	-0.919326	0.484058	1	X.PGKASKIEA.X	DECOY0_Solyc01g059950_2347
query:15668;rank:1	-0.919375	0.486957	1	X.SGGSSLGESKGCSVIFLPSMV.X	DECOY0_Solyc07g063780_22059
query:11989;rank:1	-0.919457	0.487106	1	X.SAVLPFGSVGLTSTLIKGGS.X	DECOY1_Solyc01g104110_4348
query:19810;rank:1	-0.919661	0.487106	1	X.LDLIIIIDLRLNFDIIRGISECTSVNN.X	DECOY1_Solyc11g005760_29938
query:14610;rank:1	-0.920293	0.489971	1	X.KLVGSRGDTCVKMLVKLFMD.X	DECOY0_Solyc08g006960_22539
query:18154;rank:1	-0.920328	0.490028	1	X.KGLSQSVIVQMYASSTFSLEMY.X	DECOY0_Solyc11g042820_31203
query:8666;rank:1	-0.920707	0.491477	1	X.SGLPGLMTSTILKLSLP.X	DECOY1_Solyc02g081070_7168
query:3851;rank:1	-0.920709	0.491525	1	X.KKIKTISSNSAN.X	DECOY0_Solyc12g087930_34181
query:22913;rank:1	-0.921141	0.49435	1	X.ILKAGPAIVIPIFLVVTPKMSNVLSDSVPYDRGTAMS.X	DECOY1_Solyc06g068650_18860
query:456;rank:1	-0.92126	0.497175	1	X.KDSFKSF.X	DECOY1_Solyc05g014610_15478
query:16377;rank:1	-0.921398	0.5	1	X.KLDKIPVSSVVRKKTLLSSSGF.X	DECOY1_Solyc05g008860_15006
query:17851;rank:1	-0.921438	0.5	1	X.NNISPFSKRKIDIFSTTARKTPS.X	DECOY1_Solyc12g087860_34174
query:20607;rank:1	-0.921736	0.5	1	X.QFLQTFLVKDLVDDMFKCDITVVKKQVK.X	DECOY0_Solyc03g113710_10945
query:4720;rank:1	-0.921934	0.501393	1	X.SMPPITAATGTEGK.X	DECOY1_Solyc11g045120_31330
query:17086;rank:1	-0.922234	0.506964	1	X.TLSAAKFAALANRVHGRNRLNKA.X	DECOY1_Solyc07g005590_19912
query:14109;rank:1	-0.922234	0.506964	1	X.RRLRKVLEPKFPPRPAMY.X	DECOY1_Solyc02g067100_6170
query:4854;rank:1	-0.922503	0.509749	1	X.TYRQIFNAIYV.X	DECOY1_Solyc03g045010_9424
query:18202;rank:1	-0.922503	0.511873	1	X.FGSPASNLILTGEPSFSALILFLSCGI.X	DECOY0_Solyc03g123860_11859
query:17877;rank:1	-0.922503	0.511873	1	X.MIKEQQVKWKARQFKKSVDWL.X	DECOY0_Solyc07g025300_20667
query:21103;rank:1	-0.922615	0.511873	1	X.GRVSETSSNMHEAQTSANTVKMEDLQYG.X	DECOY0_Solyc07g005400_19893
query:16015;rank:1	-0.922918	0.511873	1	X.GGDVQDEAGVELEVENQKALQHH.X	DECOY1_Solyc05g025830_15970
query:18020;rank:1	-0.92342	0.511873	1	X.SPRTPIKGRAIVAVIGAGALAGLRFGLG.X	DECOY0_Solyc05g055590_16939
query:19990;rank:1	-0.923519	0.511873	1	X.LKEDNQNAAVMAKKRELAISYEIKRTV.X	DECOY0_Solyc08g016420_22873
query:12418;rank:1	-0.923717	0.511873	1	X.MDKRWRSPEGLGFLAMV.X	DECOY1_Solyc05g026140_16000
query:18686;rank:1	-0.923885	0.511873	1	X.TYATIAVFSLEKLVPYGLELESTPSI.X	DECOY0_Solyc06g009550_17395
query:14390;rank:1	-0.924161	0.511873	1	X.FSVTNLAFNVVLLKTYGLIGG.X	DECOY0_Solyc06g035760_17709
query:7161;rank:1	-0.924212	0.511873	1	X.TTPSISNPIQRRSS.X	DECOY1_Solyc12g056590_33956
query:16492;rank:1	-0.924235	0.511873	1	X.KPVLHEARNLKDGVGISKIKMYA.X	DECOY1_Solyc03g113980_10972
query:23663;rank:1	-0.924437	0.515306	1	X.TIKVLQEGCISSSSWGLGHFCFVVAAGPLGFIMIFTLFTG.X	DECOY0_Solyc07g007560_20109
query:1699;rank:1	-0.924437	0.515306	1	X.AKLHKRVSN.X	DECOY1_Solyc08g008120_22652
query:6952;rank:1	-0.924708	0.515306	1	X.PDNLVSEAITPQDVN.X	DECOY0_Solyc05g005770_14699
query:14021;rank:1	-0.924807	0.515306	1	X.KGEDFSESLKAEYLPSVLVF.X	DECOY1_Solyc06g061090_18406
query:6075;rank:1	-0.924851	0.515306	1	X.LSQLVVEQIATKN.X	DECOY1_Solyc03g119960_11568
query:17209;rank:1	-0.924902	0.515306	1	X.LLGITLIPASAMMFMQLTTLGPLL.X	DECOY0_Solyc00g088210_567
query:21599;rank:1	-0.924906	0.515306	1	X.KTLPSVPEETIVALDSVNLPIYKAATLLFSI.X	DECOY0_Solyc00g027990_379
query:588;rank:1	-0.925104	0.515306	1	X.IDIKEKK.X	DECOY0_Solyc07g015930_20345
query:9701;rank:1	-0.925284	0.517857	1	X.KKGKHANHQQSSSIK.X	DECOY0_Solyc11g007850_30145
query:471;rank:1	-0.925401	0.519084	1	X.QPRTYVP.X	DECOY1_Solyc04g077860_14112
query:6188;rank:1	-0.925474	0.520202	1	X.PGKSMLAGFGAKIVGC.X	DECOY1_Solyc05g014550_15472
query:18778;rank:1	-0.925599	0.520202	1	X.WAHKIFQGKALIQVPLPVLVSCSTIN.X	DECOY1_Solyc10g084680_29652
query:199;rank:1	-0.925996	0.522727	1	X.KSPVGVKGG.X	DECOY1_Solyc01g079420_2786
query:17854;rank:1	-0.926095	0.526448	1	X.LIPSSHISNKMLPLAVGGINSGPTPST.X	DECOY0_Solyc04g076910_14017
query:13648;rank:1	-0.926095	0.526448	1	X.WGSGLCCLLSLTFLVKVAVNS.X	DECOY1_Solyc10g078560_29142
query:23713;rank:1	-0.926233	0.528822	1	X.PSMDPAKSPKLRRSQSFKLDASDGSTHTSSSMYHDDD.X	DECOY0_Solyc03g111030_10685
query:9336;rank:1	-0.926233	0.528822	1	X.TLPNDNILRRLCLMN.X	DECOY0_Solyc08g062330_23429
query:6301;rank:1	-0.926293	0.531328	1	X.NLGLYKKHTLGDI.X	DECOY1_Solyc01g088830_3224
query:13998;rank:1	-0.926332	0.533499	1	X.SASASITFGVVAETISSF.X	DECOY1_Solyc06g009240_17364
query:22807;rank:1	-0.92659	0.533499	1	X.VYKETYALKRVSPLALKIEQFNFTESPPLPRQDL.X	DECOY1_Solyc11g005840_29946
query:19645;rank:1	-0.926647	0.533499	1	X.SSRKRIMVIFHPALKHPRETHTLLGD.X	DECOY1_Solyc08g081810_24648
query:20458;rank:1	-0.926785	0.53598	1	X.VSSMKSRLFSELLSMLPGELVLAGLVLLSL.X	DECOY1_Solyc02g084820_7540
query:3727;rank:1	-0.926785	0.538462	1	X.NLTALFLGVTGV.X	DECOY0_Solyc10g051200_28611
query:10645;rank:1	-0.926904	0.540943	1	X.AAASSRHGKQSVTISAN.X	DECOY1_Solyc03g006630_8692
query:17540;rank:1	-0.926924	0.544335	1	X.QCGGTSSHTSFSNHSSSAVSAGG.X	DECOY0_Solyc01g087240_3065
query:9558;rank:1	-0.926924	0.544335	1	X.AKFVKMAQGRLGSMVGN.X	DECOY0_Solyc07g045510_21245
query:9114;rank:1	-0.926999	0.544335	1	X.IVQGISTKDLLVSFFL.X	DECOY0_Solyc05g006620_14783
query:20074;rank:1	-0.927062	0.551724	1	X.LPNALSAPESFNTWESGTVGGQASGCY.X	DECOY1_Solyc09g047920_25866
query:16641;rank:1	-0.927062	0.551724	1	X.PSDKGSQILFSLQRILSLDGLVL.X	DECOY1_Solyc03g117540_11328
query:8688;rank:1	-0.927062	0.551724	1	X.IVQSRGVFFKCHVPK.X	DECOY0_Solyc06g061000_18397
query:9519;rank:1	-0.927085	0.55665	1	X.IKFNCSKAPLLKVLFV.X	DECOY1_Solyc07g054600_21646
query:9287;rank:1	-0.927085	0.55665	1	X.IKRRKNMLLTIVIAN.X	DECOY0_Solyc07g062820_21963
query:11033;rank:1	-0.927284	0.559113	1	X.ELVVGAMFAVIVRSRKS.X	DECOY1_Solyc03g080060_9998
query:8525;rank:1	-0.927338	0.564039	1	X.LDVTQVIDYLSDRI.X	DECOY1_Solyc02g078640_6926
query:5723;rank:1	-0.927338	0.564039	1	X.TSIKKSVVSLPFV.X	DECOY0_Solyc02g083940_7455
query:4269;rank:1	-0.927383	0.565111	1	X.KLTMSSSCCN.X	DECOY0_Solyc02g085220_7579
query:8836;rank:1	-0.927482	0.565534	1	X.REVHGTGSIGSMALKVN.X	DECOY1_Solyc11g073030_32218
query:6499;rank:1	-0.927482	0.565534	1	X.HEVGPKVIPTVRANG.X	DECOY1_Solyc09g010950_25294
query:12661;rank:1	-0.927614	0.565534	1	X.SGSSRSGSDDSSQEMN.X	DECOY1_Solyc02g076800_6742
query:22537;rank:1	-0.928029	0.567961	1	X.SVGFTVTWVVLSESIADHKTITGIRIGSGKVSTE.X	DECOY1_Solyc01g080360_2880
query:8338;rank:1	-0.928143	0.572816	1	X.KDSFAGEPLIGVQKLGG.X	DECOY0_Solyc07g064660_22145
query:1963;rank:1	-0.928143	0.572816	1	X.KMFSLGLSKG.X	DECOY0_Solyc06g084380_19827
query:15743;rank:1	-0.928175	0.575243	1	X.KKIVPSWSFRRLELNKKT.X	DECOY1_Solyc05g041590_16140
query:11093;rank:1	-0.928333	0.57767	1	X.KLPEADVAQSSPIIGAVRI.X	DECOY1_Solyc01g066930_2540
query:4539;rank:1	-0.928524	0.578692	1	X.VVVRVLIVLVVF.X	DECOY0_Solyc12g062960_34085
query:9661;rank:1	-0.928571	0.581114	1	X.LNTPQLVFLVVIDKVH.X	DECOY0_Solyc08g080630_24531
query:21526;rank:1	-0.928581	0.582126	1	X.MKIVFKLTKVVFGVDEIDEASEPHTKKKQQSA.X	DECOY0_Solyc02g085840_7641
query:4108;rank:1	-0.928619	0.583133	1	X.KKNSSNLMGGT.X	DECOY1_Solyc04g050840_13226
query:20188;rank:1	-0.928719	0.584135	1	X.SPVSTPSLTTTPVSGSIVPPSNSPIN.X	DECOY0_Solyc05g024330_15919
query:12248;rank:1	-0.928858	0.58753	1	X.TYREIRRTHKRNIHN.X	DECOY1_Solyc05g016180_15630
query:6899;rank:1	-0.928858	0.58753	1	X.FNLLLKCVSMVHW.X	DECOY1_Solyc07g063450_22026
query:12969;rank:1	-0.928869	0.589928	1	X.NKLFDVINTFSSNCCIPLL.X	DECOY0_Solyc02g092290_8281
query:1440;rank:1	-0.928968	0.590909	1	X.GELVPVRMV.X	DECOY1_Solyc02g087180_7774
query:14423;rank:1	-0.929067	0.593301	1	X.KFLSILVAVWGVVGGYIVYGLG.X	DECOY0_Solyc01g100900_4129
query:14522;rank:1	-0.929134	0.595238	1	X.FILATEIGLSKLLGLSVNDDQ.X	DECOY1_Solyc02g005510_5224
query:7697;rank:1	-0.929134	0.595238	1	X.LKTVLRKVVLIVSN.X	DECOY1_Solyc09g011890_25388
query:20736;rank:1	-0.92941	0.5962	1	X.SLIARMMARSIRAKFIFLWRRYGQVF.X	DECOY1_Solyc12g015800_32928
query:14360;rank:1	-0.929463	0.598575	1	X.AKGSLLFLFYWHSRELAW.X	DECOY0_Solyc09g011500_25349
query:18306;rank:1	-0.929463	0.603325	1	X.LQLCRLLVKKSKVTIVLTLTAQQAT.X	DECOY0_Solyc07g065320_22211
query:9011;rank:1	-0.929463	0.603325	1	X.TDPLISVFINRHMGR.X	DECOY0_Solyc02g076830_6745
query:5308;rank:1	-0.929548	0.605701	1	X.TSLHKITAISSVT.X	DECOY1_Solyc10g081460_29430
query:6752;rank:1	-0.929686	0.608076	1	X.TYKNVVKLDIVGSTG.X	DECOY1_Solyc08g066270_23614
query:18843;rank:1	-0.92976	0.610451	1	X.RTKGLLGTDTMGFETLELLEHRLLD.X	DECOY0_Solyc04g009290_12209
query:17397;rank:1	-0.929763	0.612827	1	X.VLINADVVRRVMGVGAVRYVALVTN.X	DECOY1_Solyc06g066760_18770
query:2968;rank:1	-0.929825	0.615202	1	X.KAVTLTSTGGK.X	DECOY1_Solyc01g105410_4478
query:7281;rank:1	-0.929958	0.616114	1	X.KPPECSIQRPQRD.X	DECOY0_Solyc06g068540_18849
query:18201;rank:1	-0.930057	0.617021	1	X.DGRGQQDRQTRSKRSGRMSRQKDT.X	DECOY1_Solyc11g066650_31778
query:18545;rank:1	-0.930157	0.617925	1	X.GFSDRRHLYNKGINRVKASEISFGF.X	DECOY1_Solyc09g075800_26736
query:21804;rank:1	-0.930239	0.620283	1	X.DKDPKLTHFILILKINKSKYNYPILPRTLHN.X	DECOY0_Solyc11g020480_30803
query:308;rank:1	-0.930256	0.622642	1	X.LTAFATNT.X	DECOY1_Solyc08g075100_23990
query:1368;rank:1	-0.930355	0.623529	1	X.KDVREYVP.X	DECOY1_Solyc02g083250_7386
query:3850;rank:1	-0.930515	0.625882	1	X.QFNVGPKSKDGN.X	DECOY1_Solyc09g092390_27198
query:22213;rank:1	-0.930553	0.628235	1	X.KSPKANSSGTEPVSMSVETSSEMNATQGISIDGG.X	DECOY0_Solyc07g065600_22239
query:23399;rank:1	-0.930652	0.632319	1	X.KKSYDTSSSPSDPGNRSSSINGPSRDSGKKKGKNSS.X	DECOY0_Solyc03g118530_11427
query:18692;rank:1	-0.930652	0.632319	1	X.IKLIKNLNYDVPFKEEHLSILLAPN.X	DECOY0_Solyc01g012600_1539
query:10818;rank:1	-0.930653	0.632319	1	X.VFLPSLLSAGGLRSAVNGV.X	DECOY0_Solyc08g075680_24047
query:18722;rank:1	-0.930751	0.633178	1	X.DLAVSTKTAWKSIREGDGKLITLSP.X	DECOY0_Solyc06g051320_18037
query:17926;rank:1	-0.93085	0.640187	1	X.NYKLGAVMLTSLLTASGGLPIRHRL.X	DECOY0_Solyc06g068980_18893
query:8139;rank:1	-0.93085	0.640187	1	X.ARTVLIGLGMLLIAMV.X	DECOY0_Solyc03g118970_11469
query:1838;rank:1	-0.93085	0.640187	1	X.AGIAVQLAPLD.X	DECOY1_Solyc06g074650_19358
query:20198;rank:1	-0.93093	0.64186	1	X.KVMKDFPHKIKLFVVLDAIIGTLMVIEAG.X	DECOY0_Solyc07g065380_22217
query:16136;rank:1	-0.93093	0.64186	1	X.DITSKVAESPNSYLLNPISII.X	DECOY1_Solyc07g018230_20472
query:13128;rank:1	-0.931097	0.642691	1	X.LFKELTKLRTQMKRNR.X	DECOY0_Solyc01g110600_4995
query:11055;rank:1	-0.931192	0.645012	1	X.SAGKMVSEKGGIVKAKSGIL.X	DECOY1_Solyc02g092480_8300
query:18444;rank:1	-0.931206	0.647332	1	X.SIASTVELKTIVPLNLLQIIQMLSHL.X	DECOY1_Solyc10g044620_28172
query:3132;rank:1	-0.931444	0.649652	1	X.AKYELTKNST.X	DECOY0_Solyc07g041510_20961
query:21597;rank:1	-0.931478	0.65127	1	X.TAVVVNKTSGIEQKWSGIMKSALGQVAMKTEV.X	DECOY0_Solyc09g010520_25251
query:5166;rank:1	-0.931482	0.65127	1	X.AFLTPFPLVGKSM.X	DECOY1_Solyc01g102880_4226
query:20280;rank:1	-0.931643	0.65358	1	X.LEQSVKISPLLICKLGSLMLIGLGSGNSSLTT.X	DECOY0_Solyc11g005690_29931
query:12240;rank:1	-0.931759	0.654462	1	X.ESSNHNITPNSSNSW.X	DECOY1_Solyc03g113120_10886
query:6843;rank:1	-0.931759	0.654462	1	X.QLAVIFIALSLRKE.X	DECOY1_Solyc03g059420_9652
query:22793;rank:1	-0.931764	0.654462	1	X.TGGTRPTGLVIHIHKGHHTPEADMVNATQVHLGLAPIN.X	DECOY0_Solyc03g025810_9011
query:6685;rank:1	-0.931859	0.656751	1	X.ANSSAGMRSHSSG.X	DECOY0_Solyc05g006540_14775
query:3485;rank:1	-0.931897	0.659039	1	X.LPNLPGSLIIPQ.X	DECOY0_Solyc01g095100_3551
query:20414;rank:1	-0.931897	0.661327	1	X.TGDLAAKNMAGKVKIATRGKTLATVPGAMILN.X	DECOY0_Solyc03g083770_10169
query:21674;rank:1	-0.931955	0.662896	1	X.SGLTPDASMKSSKTYSAGLSTSFISMSAKI.X	DECOY0_Solyc03g121610_11733
query:13017;rank:1	-0.931955	0.662896	1	X.VLAKIPIVVSSLLPSIFRN.X	DECOY1_Solyc01g080200_2864
query:16216;rank:1	-0.932035	0.662896	1	X.TSSFSLHIMVAGGIKSNSGDNF.X	DECOY1_Solyc05g032690_16050
query:18579;rank:1	-0.932431	0.662896	1	X.LGVYPRNPECDYNVLILKVKLNEPN.X	DECOY1_Solyc03g123670_11840
query:6996;rank:1	-0.932587	0.665158	1	X.FGNEIRVGSIHLSLA.X	DECOY1_Solyc07g064110_22092
query:11425;rank:1	-0.932622	0.667421	1	X.DLSSLPSYHKDVLLMFN.X	DECOY0_Solyc02g081340_7195
query:20737;rank:1	-0.932717	0.671946	1	X.YRSAHQGNYPPGPFLCAGVLSIGQLWGCVSKS.X	DECOY0_Solyc09g009370_25137
query:9606;rank:1	-0.932717	0.671946	1	X.WITSKIQKKGSSILY.X	DECOY1_Solyc03g118880_11460
query:21978;rank:1	-0.932726	0.674208	1	X.VSVGFKTAIAIASEYGVSSKKDAEIINHAQTS.X	DECOY0_Solyc01g081100_2953
query:10754;rank:1	-0.932732	0.675676	1	X.VTAVGARDSSTVSRIPMGN.X	DECOY0_Solyc06g036720_17799
query:17594;rank:1	-0.932812	0.675676	1	X.TSHIHKAILQAFVKSTLPNSPLLK.X	DECOY1_Solyc07g065730_22252
query:22102;rank:1	-0.932864	0.677928	1	X.ASTVLLENINNTYYKYGIKGEGRKVFMVMLPGFN.X	DECOY0_Solyc06g064970_18595
query:18204;rank:1	-0.932908	0.678571	1	X.VLTWLDRRLEGTQTDSVRIDFNVT.X	DECOY1_Solyc02g014770_5348
query:20169;rank:1	-0.933002	0.678571	1	X.TYYALQWVGVAVKTIVVAGSITVKMISWS.X	DECOY0_Solyc01g105500_4487
query:8448;rank:1	-0.933002	0.678571	1	X.KKFDATTHISTSYM.X	DECOY0_Solyc08g067210_23707
query:19589;rank:1	-0.93314	0.680804	1	X.VGNVQGAPLTRLSLFLFANEIIGFKLQS.X	DECOY0_Solyc06g036490_17777
query:19674;rank:1	-0.933228	0.681514	1	X.NKGNLTARNIPGLSGGYVDRWTMHSTSL.X	DECOY1_Solyc07g052400_21432
query:2161;rank:1	-0.933278	0.683742	1	X.MMVIGVVVFV.X	DECOY1_Solyc12g040630_33570
query:22101;rank:1	-0.933289	0.685969	1	X.NLLLTRVVLDSVQGTPDSTPDNEFMLLFSGLKHN.X	DECOY0_Solyc10g047980_28395
query:10272;rank:1	-0.933327	0.686957	1	X.TKIVAKRFIVIANSVM.X	DECOY1_Solyc07g055590_21740
query:700;rank:1	-0.933479	0.686957	1	X.KTGIDQVH.X	DECOY1_Solyc09g007760_24982
query:22161;rank:1	-0.933525	0.686957	1	X.APAASACLDFKGLGSAIVGRMSFGAGTHARIMSEMY.X	DECOY0_Solyc09g066210_26475
query:10984;rank:1	-0.933554	0.686957	1	X.ALSGSEELAPPIAPALITSN.X	DECOY1_Solyc01g080200_2864
query:17264;rank:1	-0.93367	0.686957	1	X.FTKTSSLVLPFPPIASTFMISSAK.X	DECOY1_Solyc08g081570_24624
query:9291;rank:1	-0.933692	0.686957	1	X.KYDGDESVGESSLSS.X	DECOY1_Solyc11g066790_31792
query:931;rank:1	-0.933723	0.686957	1	X.MSGTLVVM.X	DECOY0_Solyc06g075630_19455
query:16714;rank:1	-0.933831	0.686957	1	X.MTIMRVILNTVKKVEILKIR.X	DECOY1_Solyc01g044510_2024
query:10381;rank:1	-0.933956	0.68913	1	X.IVWPSLIKNPMDLELN.X	DECOY0_Solyc02g081480_7209
query:14916;rank:1	-0.933969	0.689805	1	X.SPPAPVPVKVVSKSETDRTTD.X	DECOY0_Solyc06g072680_19161
query:17223;rank:1	-0.934107	0.690476	1	X.SDQCSSTVTDLLNSMSYPTN.X	DECOY0_Solyc08g078770_24349
query:22225;rank:1	-0.934107	0.692641	1	X.IGTWVTSDLANSEAMKMLELELTGVFRFPMIVSG.X	DECOY0_Solyc11g005970_29959
query:8279;rank:1	-0.934147	0.693305	1	X.KVSASNLIDSSGVVRT.X	DECOY1_Solyc04g009700_12250
query:12387;rank:1	-0.934242	0.693966	1	X.DGSPLSSSFKSSPLPEK.X	DECOY0_Solyc11g008150_30175
query:20349;rank:1	-0.934245	0.700431	1	X.GARLSPADPNLSVMELIISIRWRRVVVS.X	DECOY0_Solyc05g056010_16981
query:18532;rank:1	-0.934245	0.700431	1	X.QSKNNTSQLVGSYEYVTGSDRWG.X	DECOY1_Solyc10g083510_29536
query:13754;rank:1	-0.934245	0.700431	1	X.GSSSILSGMSSGSNSNASP.X	DECOY0_Solyc09g007670_24973
query:23127;rank:1	-0.934317	0.702586	1	X.SPAPPPAAHPIPKHKRKKHKHKDSPPGPTPLNQPISSGN.X	DECOY1_Solyc05g010080_15128
query:13522;rank:1	-0.934337	0.704741	1	X.GAILTLCNIKSKQRVDAGAAS.X	DECOY1_Solyc06g071010_18996
query:16604;rank:1	-0.934383	0.709052	1	X.SKHDKIKDPKNVDKKLVGMKDH.X	DECOY1_Solyc08g006240_22468
query:8552;rank:1	-0.934383	0.709052	1	X.KNEARAAKELITMKN.X	DECOY0_Solyc10g084470_29631
query:2939;rank:1	-0.934615	0.709677	1	X.QAALILPLRLI.X	DECOY1_Solyc03g026260_9056
query:7163;rank:1	-0.934623	0.711538	1	X.SLAFIMNELAIRET.X	DECOY0_Solyc12g098380_34529
query:20219;rank:1	-0.934659	0.711538	1	X.WILPDGFKIVGRVGKRFCGEAIMVIMVLL.X	DECOY1_Solyc06g060530_18350
query:16428;rank:1	-0.934714	0.711538	1	X.FPSLTISVTSNSSSASAAN.X	DECOY1_Solyc05g045660_16250
query:19334;rank:1	-0.934912	0.713675	1	X.QPCSSSIVSSPVANYTDILVSGSN.X	DECOY1_Solyc11g068960_31910
query:22617;rank:1	-0.934936	0.717949	1	X.PRSAGVGTVSLEPAKFEFSIDLSGGKIWESGSQVESV.X	DECOY0_Solyc05g013880_15407
query:18160;rank:1	-0.934936	0.717949	1	X.MRFLSPLPSSKRSRASVILKFLL.X	DECOY0_Solyc04g051380_13277
query:18667;rank:1	-0.935074	0.722222	1	X.LIASATKGTSGITGLSAKHLLKSSRFN.X	DECOY1_Solyc03g120640_11636
query:7659;rank:1	-0.935074	0.722222	1	X.PGITITNTTTPYPQR.X	DECOY0_Solyc08g079970_24465
query:6385;rank:1	-0.9351	0.722814	1	X.ERVVVARELICYN.X	DECOY1_Solyc08g083270_24792
query:6011;rank:1	-0.935212	0.727079	1	X.EMMTTESSSN.X	DECOY1_Solyc08g013940_22734
query:2312;rank:1	-0.935212	0.727079	1	X.FYLAPGEVEI.X	DECOY1_Solyc10g005130_27328
query:20057;rank:1	-0.93529	0.72766	1	X.KEEASRLIRKARRRKRKRTIHFIN.X	DECOY0_Solyc01g094650_3507
query:16513;rank:1	-0.935385	0.729787	1	X.RLCMPHSSIPSSSSPWSMY.X	DECOY0_Solyc04g080700_14391
query:18352;rank:1	-0.935407	0.731915	1	X.KLRKYGHYKGKLEVYLMFTSISL.X	DECOY1_Solyc01g098010_3842
query:9216;rank:1	-0.935488	0.733051	1	X.RSTMQVLIILRNLR.X	DECOY0_Solyc06g074340_19327
query:2692;rank:1	-0.935488	0.733051	1	X.KTGPKDLDLM.X	DECOY0_Solyc07g049390_21333
query:21305;rank:1	-0.935605	0.733615	1	X.TDDSPTSLKTSNESDTVRNLLDDAYVLL.X	DECOY0_Solyc12g014350_32883
query:12502;rank:1	-0.935671	0.734177	1	X.WADHVLPQPINPLKPYPL.X	DECOY0_Solyc12g096190_34409
query:13417;rank:1	-0.935765	0.738947	1	X.LMVVYPYKYMNKKTVRG.X	DECOY1_Solyc06g036540_17782
query:5033;rank:1	-0.935765	0.738947	1	X.NLPLTGNNIPPIGS.X	DECOY1_Solyc07g037960_20818
query:1195;rank:1	-0.935765	0.738947	1	X.TCLVRFLK.X	DECOY1_Solyc02g088280_7884
query:19559;rank:1	-0.935767	0.741344	1	X.GAPVQVFTSMRYGVFKSTSSDGAEVTE.X	DECOY0_Solyc05g051930_16575
query:5943;rank:1	-0.935767	0.741344	1	X.LKKVHGSVKMIGD.X	DECOY0_Solyc03g112010_10777
query:20049;rank:1	-0.935803	0.741344	1	X.KDYSIIPRPYGRTGHRVTVLQLLDVMN.X	DECOY1_Solyc09g013130_25412
query:378;rank:1	-0.936002	0.741344	1	X.TDGTFVQ.X	DECOY1_Solyc01g012650_1544
query:19249;rank:1	-0.936041	0.741344	1	X.VDQFSSMSWLVLNRGFCSYIWW.X	DECOY0_Solyc09g060100_26169
query:19207;rank:1	-0.936041	0.741344	1	X.SSTSSNYTWTFPSSESQTTLYT.X	DECOY1_Solyc12g056590_33956
query:17278;rank:1	-0.936041	0.741344	1	X.KKRASTSRVVFMPEENTGGSSGS.X	DECOY1_Solyc08g076930_24166
query:6139;rank:1	-0.936041	0.741344	1	X.YFILQVVRWPPN.X	DECOY1_Solyc05g018740_15776
query:1334;rank:1	-0.936053	0.741344	1	X.FRSLAIALN.X	DECOY1_Solyc00g135040_714
query:10332;rank:1	-0.936317	0.741344	1	X.AFVFLLTLFIIICLSV.X	DECOY1_Solyc03g120020_11574
query:6253;rank:1	-0.936339	0.741344	1	X.TWLTGASMLRLDS.X	DECOY1_Solyc03g093480_10242
query:3663;rank:1	-0.936398	0.741344	1	X.EGRGILGGHKAAN.X	DECOY0_Solyc11g073160_32231
query:6424;rank:1	-0.936455	0.741344	1	X.APRYPSSIPSVQPVA.X	DECOY1_Solyc03g007570_8786
query:16832;rank:1	-0.936992	0.744422	1	X.PELNLKVLYVINSLTGSLGVATPK.X	DECOY1_Solyc10g084080_29592
query:12494;rank:1	-0.936992	0.744422	1	X.GHYVSRKGFMALLIGKGS.X	DECOY1_Solyc07g017750_20426
query:14640;rank:1	-0.937006	0.744422	1	X.TTFVLIYLYLKYLQGSNFGT.X	DECOY0_Solyc05g009090_15029
query:3251;rank:1	-0.937008	0.74645	1	X.GDLKEKRRKGG.X	DECOY0_Solyc07g054040_21593
query:14649;rank:1	-0.937008	0.746479	1	X.LMFSSKVETYLSSRES.X	DECOY1_Solyc09g064440_26300
query:17694;rank:1	-0.937146	0.746479	1	X.IFPSSLPPKVVLKLMHVTYALEKN.X	DECOY1_Solyc11g020730_30828
query:1174;rank:1	-0.937146	0.746479	1	X.GSRVSMVKN.X	DECOY1_Solyc02g087800_7836
query:8651;rank:1	-0.937196	0.746988	1	X.RVMQKLSKKVGQDM.X	DECOY0_Solyc12g098320_34523
query:1294;rank:1	-0.937422	0.748996	1	X.SNPVMAGIL.X	DECOY0_Solyc07g008140_20167
query:17012;rank:1	-0.937422	0.751503	1	X.SASVASVSSAAFSSAISGKKNN.X	DECOY0_Solyc02g086610_7717
query:8707;rank:1	-0.937422	0.751503	1	X.KPPPGSPIPFPPFPPSS.X	DECOY0_Solyc10g084190_29603
query:13991;rank:1	-0.937488	0.753479	1	X.PRRQGRDGTTHEGLTMVVF.X	DECOY0_Solyc02g070110_6471
query:21044;rank:1	-0.93756	0.753479	1	X.YAVKADSHILKQEPAVETVGNQLLRAMSDRG.X	DECOY1_Solyc02g086660_7722
query:18392;rank:1	-0.937699	0.753479	1	X.GAESGVESSVWGQSPSASVLGLSN.X	DECOY1_Solyc03g114900_11064
query:7953;rank:1	-0.937785	0.753479	1	X.IFLGIKWFDDALFV.X	DECOY1_Solyc04g082860_14606
query:4770;rank:1	-0.937837	0.754455	1	X.SPQASKRSAVRN.X	DECOY1_Solyc05g023590_15846
query:4612;rank:1	-0.937837	0.754455	1	X.TFDTPSESKN.X	DECOY0_Solyc07g042790_21077
query:22120;rank:1	-0.937959	0.757339	1	X.KAPKIDMPSSRLLAVPTLSRLLLPKSTQHTSLN.X	DECOY0_Solyc08g006170_22461
query:15473;rank:1	-0.937959	0.757339	1	X.LPNPFILSVACNYTPLGKSARV.X	DECOY1_Solyc10g008670_27680
query:13654;rank:1	-0.937975	0.757339	1	X.AQQPQSLHLPANQNVVPKSGP.X	DECOY1_Solyc02g082540_7314
query:13480;rank:1	-0.937975	0.757339	1	X.HGVFRDVGVGLLLVRKANIE.X	DECOY0_Solyc01g096520_3693
query:6858;rank:1	-0.937975	0.757339	1	X.FTDSMSDELQSS.X	DECOY1_Solyc01g103020_4240
query:11245;rank:1	-0.938181	0.757339	1	X.TKPSANLRAYAEGFKKD.X	DECOY1_Solyc11g072810_32196
query:20477;rank:1	-0.938251	0.757813	1	X.AIPAQIELARKVSYDLSMLPINKLTSAFLN.X	DECOY0_Solyc04g071400_13667
query:14397;rank:1	-0.93828	0.759766	1	X.GAIGRILSPQIPLFSIKDPKR.X	DECOY0_Solyc03g031910_9121
query:568;rank:1	-0.938379	0.761165	1	X.SKQPTPTN.X	DECOY0_Solyc11g005130_29875
query:18437;rank:1	-0.938389	0.761165	1	X.KRAVPRNISAEEVDRRQKRIMKN.X	DECOY1_Solyc10g076920_29078
query:7092;rank:1	-0.938435	0.761165	1	X.QPVMSTTCDTSN.X	DECOY1_Solyc04g077380_14064
query:13780;rank:1	-0.938527	0.761628	1	X.SSSDLTEGKKSHSSKMKLV.X	DECOY0_Solyc09g074130_26569
query:21581;rank:1	-0.938577	0.763566	1	X.VIRSLDFIKFQPVRRIAGLVLQVQPRLTVNT.X	DECOY1_Solyc01g098230_3864
query:13909;rank:1	-0.938626	0.764023	1	X.SGKGCKDSTAFQQTLFELQR.X	DECOY0_Solyc03g063160_9727
query:4673;rank:1	-0.938676	0.765957	1	X.VQLGGARSRALDE.X	DECOY0_Solyc08g080550_24523
query:18369;rank:1	-0.938721	0.766409	1	X.YTTFASKILKIFNPEQIEISPTKSC.X	DECOY0_Solyc07g005740_19927
query:2910;rank:1	-0.938942	0.76834	1	X.KRYRGPPTQN.X	DECOY1_Solyc03g116840_11258
query:15870;rank:1	-0.938974	0.77027	1	X.PLRRVPDIVELLGSIDHINFV.X	DECOY0_Solyc10g005880_27403
query:8796;rank:1	-0.939007	0.770713	1	X.FEPNLLDIRALHKAN.X	DECOY0_Solyc02g083900_7451
query:21376;rank:1	-0.93908	0.771593	1	X.TYPPVTESAGKMPTSNAGTMSHFGNAKLHSFFG.X	DECOY1_Solyc10g037880_28098
query:20590;rank:1	-0.93908	0.771593	1	X.SCESTDGTVSRMCASGTATRSQMAGP.X	DECOY0_Solyc00g008030_127
query:14560;rank:1	-0.939172	0.773512	1	X.IDLFKILNPTNNGVMTLNALI.X	DECOY0_Solyc07g055220_21707
query:17818;rank:1	-0.939218	0.778388	1	X.GLNFNDLNTLWGLKFTLSFLERS.X	DECOY1_Solyc01g008390_1228
query:7696;rank:1	-0.939218	0.778388	1	X.PLSVWGLKTKLIRA.X	DECOY0_Solyc03g031570_9087
query:5635;rank:1	-0.939218	0.778388	1	X.TAAASSSFAIPPGG.X	DECOY0_Solyc11g017250_30681
query:13674;rank:1	-0.939271	0.778388	1	X.RIVKVGQIKLFGNKLGILES.X	DECOY0_Solyc06g084080_19797
query:13540;rank:1	-0.939271	0.778388	1	X.GSTIIVVARGDLTLLIAGRI.X	DECOY1_Solyc09g005600_24866
query:11642;rank:1	-0.939356	0.778388	1	X.KKAVFPGNGGSTIAAILSGIN.X	DECOY0_Solyc01g107240_4661
query:8672;rank:1	-0.939388	0.778388	1	X.LKLVAKISRGERQFV.X	DECOY0_Solyc10g085630_29747
query:21189;rank:1	-0.939483	0.778388	1	X.LPYNAALLRKRGSTKYFPVIVMSIVLNASWN.X	DECOY0_Solyc02g069050_6365
query:9088;rank:1	-0.939568	0.778388	1	X.GAAAMRRTLAAREFLK.X	DECOY1_Solyc11g011030_30360
query:3981;rank:1	-0.939667	0.778388	1	X.GISSPSRGTSN.X	DECOY0_Solyc03g083680_10161
query:6974;rank:1	-0.939766	0.778388	1	X.MLVYKRINLLPVH.X	DECOY1_Solyc11g069620_31976
query:15135;rank:1	-0.939909	0.778388	1	X.LETPQTQVPVEQTLHTKNSMV.X	DECOY1_Solyc03g007640_8792
query:11886;rank:1	-0.93996	0.778388	1	X.AANVPAGMSFERVGIFNDE.X	DECOY0_Solyc07g064820_22161
query:4524;rank:1	-0.940047	0.778388	1	X.PLQVFEITLVN.X	DECOY0_Solyc07g064600_22139
query:3277;rank:1	-0.940055	0.778388	1	X.EPSGKATNAPGG.X	DECOY0_Solyc01g081640_3007
query:12148;rank:1	-0.940162	0.778388	1	X.KRIGARYPFSVNGTMRVN.X	DECOY1_Solyc09g091050_27064
query:15388;rank:1	-0.940323	0.778388	1	X.SQNHPPGRCTLSVAPQIGITRN.X	DECOY0_Solyc10g008400_27653
query:2418;rank:1	-0.940461	0.778388	1	X.KFISLMSVKT.X	DECOY0_Solyc09g091820_27141
query:12542;rank:1	-0.940559	0.778388	1	X.PISKASPSPFPNNASTFV.X	DECOY0_Solyc02g068090_6269
query:16048;rank:1	-0.940722	0.778388	1	X.DRLQEQGGGRNWYKYEYGNGN.X	DECOY1_Solyc10g078460_29132
query:9152;rank:1	-0.940722	0.778388	1	X.NLPTKGLSTQKAFIPGN.X	DECOY0_Solyc05g006170_14739
query:4281;rank:1	-0.940738	0.778388	1	X.PGSKELARLIFV.X	DECOY0_Solyc10g076510_29037
query:8691;rank:1	-0.940856	0.779197	1	X.LLDIEDIVIIVNYVN.X	DECOY1_Solyc10g062300_28912
query:13779;rank:1	-0.940876	0.779197	1	X.VQEKNSYDTFLSAVLSLA.X	DECOY0_Solyc09g097860_27241
query:16033;rank:1	-0.940913	0.779599	1	X.TGEFFIYRLLVIDKAAMPRVF.X	DECOY0_Solyc00g015000_249
query:14645;rank:1	-0.941008	0.780797	1	X.IKVKAGIAESLSPAEYDTKLE.X	DECOY1_Solyc03g031700_9100
query:17283;rank:1	-0.941014	0.780797	1	X.KFHQMQIIKTYPKFVPRTRR.X	DECOY1_Solyc02g077320_6794
query:15259;rank:1	-0.941104	0.780797	1	X.IFIFGRVQAIAQPIDVLWVLI.X	DECOY0_Solyc09g018840_25671
query:22873;rank:1	-0.941252	0.782609	1	X.GLFRLTAAAFKSAASAAPEASRFENTLEFPDLQVRT.X	DECOY0_Solyc03g114050_10979
query:22720;rank:1	-0.94129	0.783002	1	X.EDKEFGMRIARAVQSKRLFRTEEKKIVKIPLVESS.X	DECOY1_Solyc04g074750_13900
query:22831;rank:1	-0.941294	0.78481	1	X.PASMDTPGSSSMPSAMPGFSPPPMSAPTTTLEPPMLM.X	DECOY1_Solyc08g078020_24274
query:10409;rank:1	-0.941389	0.785199	1	X.ENLKRQIDTSLKYVN.X	DECOY0_Solyc08g022080_22935
query:22494;rank:1	-0.941485	0.785586	1	X.SPTEHLETPGSTMTLDSLERMTDSTSVLSFK.X	DECOY1_Solyc01g087450_3086
query:8466;rank:1	-0.941549	0.787387	1	X.IYFKIAGPATINGDVF.X	DECOY1_Solyc06g083030_19692
query:14024;rank:1	-0.941567	0.78777	1	X.KMKIKIGLISLSLIIQSVGG.X	DECOY0_Solyc03g115050_11079
query:2263;rank:1	-0.941705	0.789286	1	X.QNKAGIRFVP.X	DECOY0_Solyc07g042620_21061
query:20453;rank:1	-0.941748	0.789286	1	X.SVANACSWVVMFESKSSALSGDGTIWED.X	DECOY1_Solyc11g064750_31592
query:9182;rank:1	-0.941748	0.789286	1	X.RKLYPGISASSILRM.X	DECOY0_Solyc02g065330_6093
query:5662;rank:1	-0.941843	0.789286	1	X.IKKADPKLIPIEN.X	DECOY0_Solyc02g085110_7569
query:12567;rank:1	-0.941981	0.789661	1	X.GSKYAASGPTGGFVYRSGAIR.X	DECOY1_Solyc10g084560_29640
query:22644;rank:1	-0.942057	0.792185	1	X.SDVFLISKSAEDYVMLLLPGNKYFYQSIYLDNLSH.X	DECOY0_Solyc03g006100_8639
query:8103;rank:1	-0.942057	0.792185	1	X.GLLCPIAVVGIGKDVMV.X	DECOY0_Solyc02g070730_6533
query:6954;rank:1	-0.942144	0.792185	1	X.TIAKARESGTHLFT.X	DECOY1_Solyc06g074710_19364
query:12612;rank:1	-0.942243	0.793961	1	X.QRFDMLKKEVTPKQAATV.X	DECOY0_Solyc05g007450_14865
query:9174;rank:1	-0.942257	0.797513	1	X.LIHPLLGKGKHLPLHN.X	DECOY1_Solyc08g074260_23908
query:4006;rank:1	-0.942257	0.797513	1	X.QSMNKSIHSV.X	DECOY0_Solyc08g014030_22743
query:13373;rank:1	-0.942342	0.79929	1	X.KQRRFIWNNTPRKKET.X	DECOY1_Solyc01g080580_2902
query:19195;rank:1	-0.942395	0.802842	1	X.DSEAVGSSDSRGSDLSSLLSVSAS.X	DECOY0_Solyc07g062660_21947
query:5813;rank:1	-0.942395	0.802842	1	X.KSKGTGKLRKNLS.X	DECOY1_Solyc06g069450_18940
query:19515;rank:1	-0.942438	0.803191	1	X.LTQLSLKTSAALLGGPVLVTAQNYVSG.X	DECOY1_Solyc11g017140_30670
query:22640;rank:1	-0.942533	0.805996	1	X.LTDGLRVWVLEAGNHIYLEAPRIGAASIAFSPWSKKM.X	DECOY1_Solyc10g080560_29342
query:7457;rank:1	-0.942533	0.805996	1	X.NRTYGPFSQLMHT.X	DECOY1_Solyc08g048460_23254
query:2356;rank:1	-0.94254	0.805996	1	X.KVLNEPMKS.X	DECOY1_Solyc12g089100_34298
query:16783;rank:1	-0.942672	0.805996	1	X.TLKRSSDGDNAFLGPAANKSQLPK.X	DECOY0_Solyc02g050200_5781
query:11081;rank:1	-0.942738	0.80776	1	X.KMKQTAKQAKGANKLRM.X	DECOY0_Solyc09g009490_25149
query:5535;rank:1	-0.94281	0.809524	1	X.NRKVFKLREGTN.X	DECOY1_Solyc01g094640_3506
query:3935;rank:1	-0.942819	0.811287	1	X.KLCSCNMVTGII.X	DECOY1_Solyc10g017490_27864
query:5847;rank:1	-0.942837	0.813051	1	X.TPKMKDSVTATII.X	DECOY0_Solyc06g083300_19719
query:9241;rank:1	-0.942948	0.814361	1	X.TKGLAAKTAEEGGQQNL.X	DECOY0_Solyc04g071340_13661
query:4147;rank:1	-0.942948	0.814361	1	X.KTGMGVATIIKT.X	DECOY0_Solyc07g020880_20535
query:3831;rank:1	-0.94301	0.814361	1	X.GPTLVAKKTCTGN.X	DECOY0_Solyc03g083990_10191
query:22381;rank:1	-0.943086	0.814361	1	X.CSVLGVLMVGLEQIDFRLNYGAPRRRMNDDLVND.X	DECOY0_Solyc03g117950_11369
query:18905;rank:1	-0.9432	0.817863	1	X.NLISIVTWTASIKTINGKTIPVRSN.X	DECOY0_Solyc12g035200_33249
query:16896;rank:1	-0.9432	0.817863	1	X.NKTLRLIKTINHPQTSGMLQATH.X	DECOY1_Solyc02g091780_8230
query:17578;rank:1	-0.943224	0.81993	1	X.VGPEQKLIKNQLATFKMLTVSYN.X	DECOY0_Solyc10g085530_29737
query:1231;rank:1	-0.943224	0.81993	1	X.QPSPVQAT.X	DECOY1_Solyc12g056510_33948
query:18931;rank:1	-0.943234	0.82199	1	X.SMAPGTTIRLFTNADEFDICGMDLKN.X	DECOY0_Solyc01g104000_4337
query:10153;rank:1	-0.943234	0.82199	1	X.KLQLFTLFQWPIILN.X	DECOY1_Solyc02g068060_6266
query:13713;rank:1	-0.943296	0.822917	1	X.SFLALITIQGLIVYILITF.X	DECOY1_Solyc02g094060_8458
query:20672;rank:1	-0.943391	0.822917	1	X.NLKLAKRSLYTGQPKTVGLITKLAFSAIADA.X	DECOY1_Solyc03g113460_10920
query:17045;rank:1	-0.943391	0.822917	1	X.LLLTSQKNPLTLNQLLGSGLITSQ.X	DECOY1_Solyc04g014650_12444
query:12870;rank:1	-0.9435	0.824957	1	X.PSPSGEFIRDFANGFSFV.X	DECOY1_Solyc11g069160_31930
query:4983;rank:1	-0.9435	0.824957	1	X.SHCILVTRLIFV.X	DECOY0_Solyc10g050660_28559
query:21144;rank:1	-0.943581	0.825561	1	X.KSSDSNSHQEMMKTIRQGVLDVMLSSILGM.X	DECOY1_Solyc12g098470_34538
query:18981;rank:1	-0.943581	0.825561	1	X.RTLESKKDLKFLAISLLCATFMLIIGG.X	DECOY0_Solyc01g011100_1495
query:14105;rank:1	-0.943772	0.825862	1	X.PIVGSMLKINESQLHVKLAI.X	DECOY0_Solyc08g007520_22595
query:4728;rank:1	-0.943777	0.827586	1	X.HHWTYEKMFV.X	DECOY1_Solyc09g059220_26084
query:16663;rank:1	-0.943828	0.82931	1	X.FLRTKIYTPVKFFVILALFSV.X	DECOY1_Solyc01g080770_2920
query:11283;rank:1	-0.943915	0.834483	1	X.VRRISGQGGKKRGGTVVM.X	DECOY0_Solyc11g067000_31813
query:8660;rank:1	-0.943915	0.834483	1	X.MIAVQITVLIRLMPN.X	DECOY0_Solyc12g027820_33213
query:7039;rank:1	-0.943915	0.834483	1	X.TTMSSLGASNTVQ.X	DECOY0_Solyc04g076910_14017
query:12696;rank:1	-0.943927	0.837931	1	X.KNLAGDVSVMHRVQHILV.X	DECOY1_Solyc08g081380_24606
query:9871;rank:1	-0.943927	0.837931	1	X.TWDIFYSMVLLAISN.X	DECOY1_Solyc01g005920_980
query:2561;rank:1	-0.943963	0.83821	1	X.IFQLGTPRFV.X	DECOY1_Solyc09g090630_27022
query:6432;rank:1	-0.943963	0.839931	1	X.HKSMEPETIKILK.X	DECOY0_Solyc01g094110_3453
query:17410;rank:1	-0.944125	0.840206	1	X.DIRLVFPLALCQTLEKTQKRHP.X	DECOY0_Solyc02g083200_7381
query:8076;rank:1	-0.944153	0.840753	1	X.PLNGPVLCVLVFLIAK.X	DECOY0_Solyc02g090700_8123
query:2049;rank:1	-0.944153	0.840753	1	X.KSKISKKGCN.X	DECOY1_Solyc02g094060_8458
query:6413;rank:1	-0.944191	0.842466	1	X.VRRGIVYSYMLPN.X	DECOY0_Solyc00g009060_155
query:20407;rank:1	-0.944191	0.843434	1	X.MGARLTYLVATKFDELHGLPDVLGTEKQW.X	DECOY1_Solyc05g052600_16642
query:6729;rank:1	-0.944191	0.843434	1	X.TRDKMLPLLYNLV.X	DECOY1_Solyc06g035680_17702
query:15097;rank:1	-0.944249	0.843434	1	X.GSKTGDRKQQQILETTQALLV.X	DECOY1_Solyc10g085080_29692
query:21764;rank:1	-0.944329	0.843434	1	X.TYECNCSLFLPSRCVARFNFACSFYLSEQ.X	DECOY0_Solyc05g006410_14763
query:21233;rank:1	-0.944344	0.843434	1	X.KVGGLIKAHHICVLRGSITSHRMGILSSLGYCN.X	DECOY1_Solyc11g017340_30690
query:602;rank:1	-0.944344	0.843434	1	X.QKNAATY.X	DECOY1_Solyc10g017870_27898
query:1543;rank:1	-0.944422	0.843434	1	X.HGVYVMLVT.X	DECOY0_Solyc01g104280_4365
query:7882;rank:1	-0.944534	0.843434	1	X.STQSSSTSSNM.X	DECOY1_Solyc06g062520_18450
query:2438;rank:1	-0.944725	0.843434	1	X.PFASTRGLKT.X	DECOY1_Solyc05g045730_16256
query:11878;rank:1	-0.944744	0.845118	1	X.HESIRYFILQVVRAPPN.X	DECOY1_Solyc05g018740_15776
query:4550;rank:1	-0.944918	0.846801	1	X.YTKIMGMIKKK.X	DECOY0_Solyc12g005300_32277
query:17333;rank:1	-0.945011	0.847059	1	X.AVIVGSLSVSLYDARKWIKMVTLL.X	DECOY0_Solyc04g049550_13111
query:22483;rank:1	-0.94502	0.847826	1	X.PSLPGAVKRIGSGIIFPLITMSGVMLKSQLAVALEP.X	DECOY1_Solyc08g041850_23102
query:13388;rank:1	-0.94502	0.847826	1	X.LAECLMVALQIVRYTNSEN.X	DECOY1_Solyc10g079460_29232
query:8503;rank:1	-0.945106	0.847826	1	X.LSSRNALVQVAISPN.X	DECOY1_Solyc11g069500_31964
query:12095;rank:1	-0.945158	0.84808	1	X.PMRRGPQLPQQLVQAPVM.X	DECOY0_Solyc01g107870_4723
query:5339;rank:1	-0.945215	0.84975	1	X.VLFTSDLTILAVF.X	DECOY0_Solyc05g055510_16931
query:22194;rank:1	-0.945297	0.851419	1	X.EEWVMRLIESLDLAFTGTTKMSRASQHIVSAN.X	DECOY1_Solyc01g057310_2186
query:3192;rank:1	-0.945314	0.853088	1	X.ILVDITNLNLN.X	DECOY1_Solyc02g065170_6078
query:7046;rank:1	-0.945314	0.854098	1	X.MNVFSEVIKLSRN.X	DECOY1_Solyc02g076760_6738
query:13951;rank:1	-0.945413	0.854098	1	X.SEIYHKLMIAFLGARGKTPT.X	DECOY0_Solyc02g082160_7277
query:4852;rank:1	-0.945434	0.854098	1	X.FVMHLVIKLSSN.X	DECOY0_Solyc12g062720_34065
query:4419;rank:1	-0.945487	0.854098	1	X.KKAVRSATQLKN.X	DECOY1_Solyc11g010920_30350
query:10591;rank:1	-0.945573	0.854098	1	X.TPKSAKKVKRYTTLGQN.X	DECOY1_Solyc04g081170_14438
query:6581;rank:1	-0.945583	0.854098	1	X.TVIARRARFRTA.X	DECOY1_Solyc12g016010_32948
query:7844;rank:1	-0.94571	0.854098	1	X.NCTGMLATSMVPSNA.X	DECOY0_Solyc01g028970_1971
query:3757;rank:1	-0.94571	0.854098	1	X.ILSSIAGYPLAT.X	DECOY0_Solyc08g014350_22775
query:21645;rank:1	-0.945711	0.854098	1	X.QTARLGLFDLLLADHHQWERHLCKFRVFQP.X	DECOY0_Solyc05g053240_16705
query:7742;rank:1	-0.945711	0.854098	1	X.RLFQIVKTDIFTAN.X	DECOY0_Solyc04g009210_12201
query:4579;rank:1	-0.945809	0.85443	1	X.KRAPYLTGLVY.X	DECOY1_Solyc03g019650_8894
query:4094;rank:1	-0.945809	0.85443	1	X.ITFALLTMRFV.X	DECOY1_Solyc02g065770_6136
query:21125;rank:1	-0.945849	0.85443	1	X.RSFTVVVIPISLLASVMTPVLLSIVYVDLVVM.X	DECOY0_Solyc03g119990_11571
query:17427;rank:1	-0.945964	0.85443	1	X.KNGAADRGAPPAVVELTPTKAKAVVVE.X	DECOY0_Solyc10g078930_29179
query:15929;rank:1	-0.946008	0.85443	1	X.LAHVPSSLGNFGTSESTPMR.X	DECOY1_Solyc01g108120_4748
query:4627;rank:1	-0.946008	0.85443	1	X.RNNIAISLRMY.X	DECOY1_Solyc05g013670_15386
query:2703;rank:1	-0.946059	0.85443	1	X.TSRIATKIPPN.X	DECOY1_Solyc01g060250_2376
query:20741;rank:1	-0.946125	0.85443	1	X.SKPKSAPKKKGKHTRRKNKKRKQSVSTN.X	DECOY0_Solyc02g081680_7229
query:14528;rank:1	-0.946125	0.85443	1	X.PAKVPSPTKRNPIPLNSALFV.X	DECOY1_Solyc12g062210_34018
query:2931;rank:1	-0.946125	0.85443	1	X.SEGSNKKRPH.X	DECOY0_Solyc03g097750_10559
query:12377;rank:1	-0.946155	0.85443	1	X.TYSPVAETRKRNKKKYI.X	DECOY0_Solyc03g098540_10637
query:8140;rank:1	-0.94625	0.85443	1	X.PCAAMNHKVVEKIYT.X	DECOY0_Solyc04g071870_13711
query:5790;rank:1	-0.946305	0.85443	1	X.PTPTIGSTVSTN.X	DECOY0_Solyc05g012440_15265
query:1241;rank:1	-0.946305	0.85443	1	X.TAGGPINIMGG.X	DECOY0_Solyc00g042640_459
query:19356;rank:1	-0.946345	0.85443	1	X.QSAGFVFSNRVQMLLIFNLSTLDQT.X	DECOY0_Solyc11g042820_31203
query:15934;rank:1	-0.946401	0.85443	1	X.MPQADVDRTSNSYSAALWSVN.X	DECOY0_Solyc10g086440_29827
query:16133;rank:1	-0.946404	0.85443	1	X.PELEYRGSVYMNSMVVTSNKL.X	DECOY1_Solyc03g098420_10626
query:767;rank:1	-0.94654	0.85443	1	X.QLGSKGDIS.X	DECOY1_Solyc09g098270_27282
query:936;rank:1	-0.946678	0.85443	1	X.RHALEPPN.X	DECOY1_Solyc04g076660_13992
query:5952;rank:1	-0.946816	0.85624	1	X.QMSRLLQVILPN.X	DECOY1_Solyc08g005560_22402
query:4253;rank:1	-0.946816	0.85624	1	X.QVYLVDVQMCGG.X	DECOY1_Solyc05g015970_15610
query:14923;rank:1	-0.946899	0.858044	1	X.FQRIRREMQEIKALSRVN.X	DECOY1_Solyc04g054930_13422
query:1230;rank:1	-0.946899	0.858044	1	X.VPTAMIAVDA.X	DECOY0_Solyc07g042600_21059
query:5643;rank:1	-0.946917	0.858915	1	X.KIRKRISHRSN.X	DECOY1_Solyc01g079280_2772
query:5138;rank:1	-0.946917	0.858915	1	X.KKSLLRVGAFIVS.X	DECOY1_Solyc09g010080_25208
query:2971;rank:1	-0.946917	0.858915	1	X.KSIGSPALAVSI.X	DECOY0_Solyc00g011890_203
query:22878;rank:1	-0.947012	0.858915	1	X.AINMSLQEVDIIQEDNKAERKDMIEVKSGLEQIKK.X	DECOY0_Solyc11g005690_29931
query:4118;rank:1	-0.947097	0.858915	1	X.GSKELARLIFV.X	DECOY0_Solyc10g076510_29037
query:8107;rank:1	-0.947097	0.858915	1	X.LSSETSGSATSN.X	DECOY0_Solyc01g056950_2153
query:724;rank:1	-0.947196	0.858915	1	X.VKAANVLSV.X	DECOY1_Solyc03g044810_9404
query:6585;rank:1	-0.947295	0.858915	1	X.KGTQVYANVLDIEK.X	DECOY0_Solyc05g053600_16741
query:8748;rank:1	-0.947368	0.858915	1	X.NVTAKKAHVGPGFDIN.X	DECOY1_Solyc03g111180_10700
query:7911;rank:1	-0.947394	0.858915	1	X.AGKLLAVEPTTAHDQQ.X	DECOY1_Solyc05g042050_16186
query:10115;rank:1	-0.947394	0.859351	1	X.RRGGGRGGSSRYTGIGAAG.X	DECOY1_Solyc07g063170_21998
query:18744;rank:1	-0.947489	0.859351	1	X.YTVTDVVALFKYLTPLTIDPLGGRAE.X	DECOY1_Solyc11g008530_30212
query:18298;rank:1	-0.947494	0.86	1	X.FPLVVDDRLYFTMVLEIQKRRN.X	DECOY1_Solyc11g042700_31192
query:17690;rank:1	-0.947584	0.86	1	X.SNSLQEALFGLIHYIKLTYKQN.X	DECOY0_Solyc03g033620_9193
query:2853;rank:1	-0.947645	0.86	1	X.LLLLLIMTKR.X	DECOY1_Solyc04g077360_14062
query:9657;rank:1	-0.947679	0.861538	1	X.MKYRSSPKASGKLSTN.X	DECOY1_Solyc04g071010_13628
query:10973;rank:1	-0.947775	0.864615	1	X.KTFGSTIIEANAKSIKIE.X	DECOY0_Solyc09g090320_26991
query:7372;rank:1	-0.947775	0.864615	1	X.IIWSLQTYRVLVF.X	DECOY0_Solyc06g070940_18989
query:11973;rank:1	-0.947783	0.869432	1	X.PKGQKTCKRFPKKNFQN.X	DECOY0_Solyc06g034070_17643
query:6770;rank:1	-0.947783	0.869432	1	X.SLRSSLFLGNKLFN.X	DECOY0_Solyc05g017990_15705
query:5681;rank:1	-0.947783	0.869432	1	X.LVGLLYEKGNEMV.X	DECOY0_Solyc03g118110_11385
query:2667;rank:1	-0.947783	0.869432	1	X.RKTKVLLGAK.X	DECOY0_Solyc12g010020_32649
query:21425;rank:1	-0.947791	0.869832	1	X.MMLPDILTSYVSSGILTLSELTWDIFYSM.X	DECOY1_Solyc01g005920_980
query:18560;rank:1	-0.947791	0.869832	1	X.KNSSKLHTNPFGQAHPLQAPYSRKN.X	DECOY0_Solyc08g061120_23311
query:10707;rank:1	-0.947921	0.87156	1	X.DLSSDYASAVSPSSSH.X	DECOY1_Solyc11g042440_31170
query:8565;rank:1	-0.947921	0.87156	1	X.SNGIIITFASPGDAYPL.X	DECOY0_Solyc03g096000_10389
query:8903;rank:1	-0.947989	0.871756	1	X.ILRSMGQLLHALLLW.X	DECOY0_Solyc02g069290_6389
query:5567;rank:1	-0.948059	0.874809	1	X.QSAKKCRVMLKGT.X	DECOY1_Solyc07g066200_22298
query:3477;rank:1	-0.948059	0.874809	1	X.LNIGSSLHLLD.X	DECOY1_Solyc12g017480_32994
query:16439;rank:1	-0.948088	0.875	1	X.LPLAANVRLRDLIDEGSMVSFKT.X	DECOY0_Solyc10g055450_28827
query:21506;rank:1	-0.948187	0.877273	1	X.KTFTSTIDTHAQNTDTSDGSMVATSRKHS.X	DECOY0_Solyc07g062620_21943
query:13658;rank:1	-0.948187	0.877273	1	X.FIAIHVLTLMAFLPVGPVSAN.X	DECOY0_Solyc09g014380_25437
query:17322;rank:1	-0.948197	0.877273	1	X.FALIQDSRFVYTRERAVALPFV.X	DECOY0_Solyc08g067610_23747
query:9846;rank:1	-0.948197	0.877273	1	X.RSSGPSSASNASVTSH.X	DECOY1_Solyc02g067980_6258
query:1374;rank:1	-0.948197	0.877273	1	X.LTYQPDRI.X	DECOY1_Solyc05g056500_17030
query:12629;rank:1	-0.948385	0.878971	1	X.NLATLNVYASLSNKRGIN.X	DECOY1_Solyc07g005250_19878
query:5052;rank:1	-0.948385	0.878971	1	X.RVVTLESQKRN.X	DECOY0_Solyc08g061960_23393
query:13178;rank:1	-0.948583	0.880292	1	X.LVNQRLSRKSLKKSVMV.X	DECOY0_Solyc03g111920_10771
query:3536;rank:1	-0.948583	0.880292	1	X.DDYQKLDRVN.X	DECOY0_Solyc00g066140_519
query:21799;rank:1	-0.948612	0.880292	1	X.ENPSIGQVIRLTILGLSDLNHRQESCQIIIILM.X	DECOY0_Solyc02g071790_6639
query:10577;rank:1	-0.948612	0.880292	1	X.IPATPSVVATAIAAVVLVF.X	DECOY1_Solyc12g056570_33954
query:10565;rank:1	-0.948612	0.880292	1	X.PSIISVLFTSPLTILAVF.X	DECOY0_Solyc05g055510_16931
query:3484;rank:1	-0.948612	0.880292	1	X.RMKLVVSGIEN.X	DECOY1_Solyc10g052690_28658
query:674;rank:1	-0.948612	0.880292	1	X.MTIPILVC.X	DECOY1_Solyc01g096390_3680
query:17829;rank:1	-0.948632	0.880292	1	X.KIISVNPLFGKVTEEKKVDIICNV.X	DECOY0_Solyc03g082420_10035
query:13203;rank:1	-0.948632	0.880292	1	X.NRLILNEQILTSKKKSSN.X	DECOY1_Solyc09g059800_26140
query:11699;rank:1	-0.948682	0.880292	1	X.MTVLRANLKSPLIGDVQA.X	DECOY0_Solyc01g066520_2503
query:7531;rank:1	-0.948881	0.880292	1	X.LARRTHPMVNLISE.X	DECOY1_Solyc02g082030_7264
query:21180;rank:1	-0.948888	0.880292	1	X.RSVQTMNSPFIMVDQPNPFSIQGDNQAF.X	DECOY1_Solyc05g055240_16904
query:9435;rank:1	-0.94898	0.880292	1	X.ITVSIVYKLKIVSHPN.X	DECOY0_Solyc06g061260_18423
query:10081;rank:1	-0.949026	0.880292	1	X.RNLAYQWSLSLVIDL.X	DECOY1_Solyc04g015190_12498
query:18036;rank:1	-0.949164	0.880292	1	X.QDALYMKALFNSSVIQGLSESVGS.X	DECOY0_Solyc01g006530_1041
query:6157;rank:1	-0.949164	0.880292	1	X.PGKLGGIRSRAIHGN.X	DECOY1_Solyc08g074580_23938
query:16650;rank:1	-0.949178	0.880292	1	X.KSQAPPEAENKAIISQANLMIITI.X	DECOY0_Solyc03g122370_11809
query:4112;rank:1	-0.949178	0.880292	1	X.KGVLSDVLTPTC.X	DECOY1_Solyc07g008950_20248
query:2806;rank:1	-0.949277	0.880292	1	X.VGPEKIYRVF.X	DECOY0_Solyc04g050720_13215
query:23745;rank:1	-0.949395	0.880292	1	X.RKSSDSNSGTSGPSPPHLPVDSSSHSKANNMTSPSNLALPSS.X	DECOY1_Solyc06g065640_18662
query:8384;rank:1	-0.949441	0.880292	1	X.IAGFPFMPPTPSCKLN.X	DECOY0_Solyc05g055470_16927
query:1065;rank:1	-0.949441	0.880292	1	X.QPTHWQY.X	DECOY0_Solyc01g088160_3157
query:16957;rank:1	-0.949579	0.884672	1	X.RAPTKSLLVEDVMKLAHTLVDK.X	DECOY1_Solyc06g066340_18730
query:16474;rank:1	-0.949579	0.884672	1	X.GPLNAMVSGGDSPVTASGYMGFV.X	DECOY1_Solyc01g091590_3400
query:4784;rank:1	-0.949579	0.884672	1	X.STTLIDATKN.X	DECOY1_Solyc10g006970_27512
query:12122;rank:1	-0.949585	0.886297	1	X.VNFDEKEVIFLNAGQSSS.X	DECOY1_Solyc12g009570_32604
query:6368;rank:1	-0.949585	0.886297	1	X.VQFVLFRFGTHPN.X	DECOY0_Solyc10g084990_29683
query:1211;rank:1	-0.949717	0.887755	1	X.KVVAKVPIK.X	DECOY0_Solyc01g108400_4775
query:16486;rank:1	-0.949776	0.889213	1	X.GPRSADYEYVKGSRDGQVIRKVS.X	DECOY0_Solyc03g097550_10539
query:8462;rank:1	-0.949855	0.889374	1	X.NIIGARLDRDPGYSV.X	DECOY0_Solyc02g063360_5997
query:13012;rank:1	-0.949871	0.889535	1	X.TAASLGGKSCGGSTPTRN.X	DECOY0_Solyc02g089150_7971
query:14274;rank:1	-0.949871	0.892754	1	X.VIGIAAPPLSIGAGSTYHVSKTA.X	DECOY0_Solyc05g014150_15433
query:12347;rank:1	-0.949871	0.892754	1	X.PLSHQLTSSATLSHSN.X	DECOY1_Solyc03g114720_11046
query:5539;rank:1	-0.949871	0.892754	1	X.RILVSYGLRITGN.X	DECOY1_Solyc03g013440_8872
query:7271;rank:1	-0.949967	0.892754	1	X.FIAIIVYIIIDLII.X	DECOY1_Solyc01g073950_2738
query:7923;rank:1	-0.949993	0.894203	1	X.EKADVSVALVLTRSL.X	DECOY1_Solyc06g064910_18590
query:7014;rank:1	-0.950062	0.894356	1	X.CTSDTAPIPVNGIS.X	DECOY0_Solyc11g027780_30925
query:11253;rank:1	-0.950069	0.894509	1	X.DVVLSGLGGRAIAAVKQKN.X	DECOY1_Solyc03g114640_11038
query:15694;rank:1	-0.950157	0.894813	1	X.TNASGKHGNDNRTPLVVKNFKS.X	DECOY1_Solyc09g009380_25138
query:20398;rank:1	-0.950253	0.894813	1	X.VTLAVDVKLFSSGAEIPIKMWMPIYTLAL.X	DECOY1_Solyc12g042950_33698
query:18239;rank:1	-0.950269	0.898135	1	X.TREFWHSLPFEVDSGPKFPFSIG.X	DECOY0_Solyc11g021160_30869
query:16830;rank:1	-0.950269	0.898135	1	X.LLSLGTVKEDLALDTLNARRAPGC.X	DECOY0_Solyc06g075350_19427
query:12824;rank:1	-0.950269	0.898135	1	X.KAGLFTIRRSPLRAPIRP.X	DECOY1_Solyc02g090290_8082
query:12205;rank:1	-0.950269	0.898135	1	X.TEPSPVLNTSGKSINISVF.X	DECOY1_Solyc01g099190_3960
query:10996;rank:1	-0.950269	0.898135	1	X.IVDLLVSCRAVQVLRGVN.X	DECOY1_Solyc11g062310_31546
query:17572;rank:1	-0.950408	0.899148	1	X.GLKNLIQLSAKTMMSILNILTATY.X	DECOY0_Solyc07g065700_22249
query:2633;rank:1	-0.950408	0.899148	1	X.SDTSTSSC.X	DECOY1_Solyc11g071570_32072
query:20275;rank:1	-0.950466	0.899148	1	X.GPLIIIMEHMSFSWESKSFMMVSALLSAGG.X	DECOY0_Solyc01g068410_2685
query:19125;rank:1	-0.950466	0.899148	1	X.KNQGNLLPPKSLRQLLHLTGKQNFGSK.X	DECOY0_Solyc01g007130_1101
query:18587;rank:1	-0.950546	0.899148	1	X.KTGLVPFNSGGSRLPTNPPTPTTEN.X	DECOY0_Solyc06g076490_19541
query:6884;rank:1	-0.950546	0.899148	1	X.FDTSSEKEQSQ.X	DECOY1_Solyc08g077500_24222
query:1533;rank:1	-0.950684	0.899148	1	X.CNYSPAAPPGG.X	DECOY1_Solyc02g083190_7380
query:17940;rank:1	-0.950729	0.901989	1	X.IDMLTSVLESKFTIGSGGNVTN.X	DECOY0_Solyc02g072160_6675
query:7085;rank:1	-0.950729	0.901989	1	X.ESTSSVTQTVT.X	DECOY0_Solyc01g044390_2013
query:15989;rank:1	-0.950763	0.903439	1	X.KDLPGRIGILKLVTLFSLSMSN.X	DECOY1_Solyc02g077200_6782
query:3736;rank:1	-0.950763	0.903439	1	X.KISQCSCSSC.X	DECOY1_Solyc04g072360_13760
query:22542;rank:1	-0.950822	0.903439	1	X.VVAPSSSFHSVRSLLGYPSRLMSVDLIAHGKATWIP.X	DECOY1_Solyc10g084320_29616
query:14559;rank:1	-0.950822	0.903439	1	X.TIRTIADLRDKHGSGSMFLVL.X	DECOY1_Solyc04g028400_12908
query:12873;rank:1	-0.950822	0.903439	1	X.LLNFLYVLSCNCSTVRTST.X	DECOY0_Solyc11g008520_30211
query:20430;rank:1	-0.950862	0.903439	1	X.MQTAIGKDKGMADSSTSIIHGEVSGTIGS.X	DECOY0_Solyc02g031860_5555
query:19345;rank:1	-0.95092	0.903439	1	X.NLTQSKITIKGSIQRTKGLLGTDTMGF.X	DECOY0_Solyc04g009290_12209
query:2476;rank:1	-0.95092	0.903439	1	X.LRVMVIMSTN.X	DECOY1_Solyc06g054350_18236
query:9865;rank:1	-0.95096	0.903439	1	X.KKKLAPITAKSEAPITR.X	DECOY0_Solyc08g077630_24235
query:1353;rank:1	-0.95096	0.903439	1	X.QSTKYIVS.X	DECOY0_Solyc06g005930_17133
query:4276;rank:1	-0.95106	0.903439	1	X.SLTLVFFILYN.X	DECOY0_Solyc00g127670_691
query:16644;rank:1	-0.951098	0.903439	1	X.SLSSESNSTSKTEVISTC.X	DECOY0_Solyc10g076990_29085
query:12304;rank:1	-0.951098	0.903439	1	X.SEFLSNIGLGARGINIPSA.X	DECOY0_Solyc06g076910_19581
query:2343;rank:1	-0.951098	0.903439	1	X.NRALSAKIHE.X	DECOY0_Solyc09g018370_25627
query:16079;rank:1	-0.951098	0.903439	1	X.VIKTPELFIQVMVQEAIVPGQS.X	DECOY1_Solyc12g006380_32384
query:12865;rank:1	-0.95111	0.903439	1	X.SDFRCMQKAVGQVSAVVYE.X	DECOY0_Solyc02g086570_7713
query:7452;rank:1	-0.951236	0.903439	1	X.KKTESLSSATEM.X	DECOY0_Solyc01g099650_4005
query:16656;rank:1	-0.951258	0.903439	1	X.GSGGPHCAQSSSGTIVITSKLGG.X	DECOY1_Solyc08g028690_22992
query:14379;rank:1	-0.951301	0.903439	1	X.KFDKVISLIDRLGLKVTSN.X	DECOY1_Solyc07g049220_21316
query:10679;rank:1	-0.951301	0.903439	1	X.GMLKEAAALIKNLVGSAII.X	DECOY1_Solyc03g097680_10552
query:18612;rank:1	-0.951374	0.903439	1	X.RKTQELEPSAAEVFKSAKLRFSSH.X	DECOY0_Solyc04g076430_13969
query:4091;rank:1	-0.951456	0.903439	1	X.KNYRISKPII.X	DECOY0_Solyc02g082260_7287
query:16978;rank:1	-0.951513	0.903439	1	X.TVCLPFTNCDSYNAVNTATTHN.X	DECOY1_Solyc06g051570_18060
query:12275;rank:1	-0.951555	0.903439	1	X.DEPQLILDKKSLRVVGAN.X	DECOY0_Solyc01g017810_1855
query:12110;rank:1	-0.951555	0.903439	1	X.AQGKVVVDEGKTPIPVGVRN.X	DECOY0_Solyc01g067530_2599
query:8800;rank:1	-0.951555	0.903439	1	X.NLLHKTVAKSAVSALAK.X	DECOY0_Solyc05g056170_16997
query:9808;rank:1	-0.951587	0.903439	1	X.TCSISPLDGSMCIAGIGK.X	DECOY1_Solyc02g079140_6976
query:8143;rank:1	-0.951651	0.903439	1	X.YDLKLRTSSTSN.X	DECOY0_Solyc01g067080_2555
query:1751;rank:1	-0.951654	0.903439	1	X.IGIIEGFPPN.X	DECOY1_Solyc04g077520_14078
query:23820;rank:1	-0.951682	0.903439	1	X.NSSLAMGPPIKRRNAVILKANQDLRHLMNKSFIYSNWRKAS.X	DECOY0_Solyc10g080070_29293
query:14782;rank:1	-0.951682	0.903439	1	X.TAVVAKMAVSTLDLYAPLLSPT.X	DECOY0_Solyc08g082560_24723
query:10643;rank:1	-0.951853	0.903439	1	X.TLGVLEVMFLGIKIEFV.X	DECOY1_Solyc09g064520_26308
query:10337;rank:1	-0.951853	0.903439	1	X.HSLDLNCSTTTPCT.X	DECOY1_Solyc02g068460_6306
query:8020;rank:1	-0.951968	0.903439	1	X.QLLKKSRVLRVRGG.X	DECOY0_Solyc02g092010_8253
query:20140;rank:1	-0.952051	0.903439	1	X.KFVKPASLITATRQFNKPLKLKAPTMTN.X	DECOY1_Solyc03g005090_8538
query:14892;rank:1	-0.952051	0.903439	1	X.PKSSESFSETSEESIED.X	DECOY0_Solyc03g113890_10963
query:15356;rank:1	-0.952065	0.903439	1	X.NGATAGATVWSGTSSITTSSMV.X	DECOY0_Solyc05g054790_16859
query:7166;rank:1	-0.952065	0.903439	1	X.PRSGNSRKCHVKVR.X	DECOY1_Solyc09g005460_24852
query:7134;rank:1	-0.952249	0.903439	1	X.PSPVQLLKMKLGKS.X	DECOY0_Solyc03g115610_11135
query:10016;rank:1	-0.952254	0.903439	1	X.ELVLVMVLIPLPKQRN.X	DECOY0_Solyc03g117950_11369
query:14501;rank:1	-0.952341	0.903439	1	X.SRFPPYAPPQLSYSARIMSR.X	DECOY1_Solyc05g012350_15256
query:13697;rank:1	-0.952348	0.903439	1	X.KLILPLGQMNSVTAGRKCDR.X	DECOY1_Solyc03g120800_11652
query:15919;rank:1	-0.952349	0.903439	1	X.KNSGPFNTVLVKKSNRSKISTT.X	DECOY1_Solyc09g074200_26576
query:19833;rank:1	-0.952447	0.903439	1	X.LQQQIYKTLRTAESDDSKIVSSEKQT.X	DECOY1_Solyc04g076560_13982
query:11173;rank:1	-0.95248	0.903439	1	X.KGGDKDFLSMVHTQFLM.X	DECOY0_Solyc12g041960_33603
query:7752;rank:1	-0.95254	0.903439	1	X.SLQAFRKIGYRKSI.X	DECOY0_Solyc04g045310_12993
query:21231;rank:1	-0.952546	0.903439	1	X.KATINPPRYVYLALDKYDGKRLPDPNKPFM.X	DECOY1_Solyc03g083900_10182
query:19247;rank:1	-0.952546	0.903439	1	X.TVSSNTGTRFSIELSHDSESSHW.X	DECOY0_Solyc03g117170_11291
query:587;rank:1	-0.95273	0.903567	1	X.KTTKSTK.X	DECOY0_Solyc12g011180_32765
query:19395;rank:1	-0.952744	0.906209	1	X.VALMLQIILKTLPRKMLGDVILRVKRG.X	DECOY1_Solyc02g032930_5658
query:9772;rank:1	-0.952744	0.906209	1	X.YLPSLRVFCILTRTY.X	DECOY0_Solyc06g073540_19247
query:21438;rank:1	-0.952756	0.908854	1	X.GSKTPRKALLFCLVACVTVVVLGFLMVLMLVS.X	DECOY0_Solyc03g115610_11135
query:15780;rank:1	-0.952756	0.908854	1	X.NSERGEEVQGGTGLDELDLTN.X	DECOY0_Solyc01g103660_4303
query:14962;rank:1	-0.952756	0.908854	1	X.AYGPCQIVVFAKLIYMDVSNAG.X	DECOY1_Solyc08g075430_24022
query:10159;rank:1	-0.952756	0.908854	1	X.IFFFHYMRKTRVNT.X	DECOY1_Solyc05g010060_15126
query:9950;rank:1	-0.952756	0.908854	1	X.KLTTAYKNYDVKVDLS.X	DECOY0_Solyc00g102400_613
query:15498;rank:1	-0.952756	0.908854	1	X.KKVLEVEVDKGSSGCNSLLLMV.X	DECOY1_Solyc11g008670_30226
query:15527;rank:1	-0.952826	0.908854	1	X.CTTKSQSYSYLADNDFTFN.X	DECOY0_Solyc09g072700_26525
query:1938;rank:1	-0.952843	0.908854	1	X.IPVNLHSSVN.X	DECOY0_Solyc08g062780_23471
query:9802;rank:1	-0.952894	0.908854	1	X.YGDDMYMDPGSGAMLGG.X	DECOY1_Solyc01g099370_3978
query:7692;rank:1	-0.952894	0.908854	1	X.VEILPRLERSPSEG.X	DECOY1_Solyc01g106330_4570
query:19677;rank:1	-0.952921	0.908854	1	X.GARHSFAMNAMVGSSKHGIFYVMLLLGTD.X	DECOY1_Solyc11g056450_31460
query:15843;rank:1	-0.952921	0.908854	1	X.PSANNTGPTDGYPSSRVSGTGG.X	DECOY1_Solyc04g064700_13596
query:16447;rank:1	-0.953041	0.908973	1	X.PPLGNPTPSYLQHPVHPLLTSLSP.X	DECOY0_Solyc01g095900_3631
query:16290;rank:1	-0.953112	0.909091	1	X.VGGSLKAVIKRGEDGMGVGLTDLFV.X	DECOY0_Solyc07g055360_21721
query:23012;rank:1	-0.95314	0.910506	1	X.YGKVNVFGVVWVDHHITILAPHKEKDWLNLHASVCVL.X	DECOY1_Solyc07g037940_20816
query:18040;rank:1	-0.95314	0.910506	1	X.PSGCISGIVCNSLVCKSCGTQAIMLR.X	DECOY0_Solyc03g007400_8769
query:21679;rank:1	-0.953207	0.914397	1	X.ITNLDFNKLYGGLNGVLAEMPDRKPGPDRGPVKL.X	DECOY1_Solyc02g080250_7086
query:21087;rank:1	-0.953207	0.914397	1	X.KVNTHRIDKDAPGNGNLIVRIKDLGAMFAKI.X	DECOY0_Solyc06g036080_17739
query:11619;rank:1	-0.953207	0.914397	1	X.KPTSYITSGSATFSS.X	DECOY0_Solyc11g050730_31391
query:3178;rank:1	-0.95324	0.915694	1	X.GAWRGSIGRSGG.X	DECOY0_Solyc04g083010_14621
query:17304;rank:1	-0.953302	0.915803	1	X.TYPKYFGSSKKVLLTETKLPTI.X	DECOY0_Solyc05g013820_15401
query:21293;rank:1	-0.953308	0.921087	1	X.PLNMIGVSGLRYLDGDEKIRELCGILLFISQ.X	DECOY0_Solyc04g054140_13353
query:20715;rank:1	-0.953308	0.921087	1	X.VDPFDPVLERLKAQGLTNVMIGQLKGIVGGDS.X	DECOY1_Solyc12g015710_32920
query:15065;rank:1	-0.953308	0.921087	1	X.RNKGLILYIKVHERSSDFASG.X	DECOY1_Solyc10g049790_28474
query:11270;rank:1	-0.953308	0.921087	1	X.SVVLFSLTEKGGQGYEW.X	DECOY1_Solyc01g007940_1182
query:10554;rank:1	-0.953308	0.921087	1	X.LIDSIRASTTVRVLKFV.X	DECOY0_Solyc09g011280_25327
query:10970;rank:1	-0.953339	0.922481	1	X.GAKVLLQVDLSKKVRTN.X	DECOY0_Solyc11g065920_31705
query:1537;rank:1	-0.953339	0.922481	1	X.ALPICFQKN.X	DECOY0_Solyc09g066270_26481
query:9653;rank:1	-0.953438	0.92278	1	X.AEEAPFEVLTEGNLTTN.X	DECOY1_Solyc03g059180_9628
query:14069;rank:1	-0.953447	0.92278	1	X.MAQIKHTKGKTPKRIVSTSG.X	DECOY1_Solyc10g078400_29126
query:4043;rank:1	-0.953493	0.92278	1	X.TMEGEDDDVMA.X	DECOY1_Solyc03g093440_10238
query:14011;rank:1	-0.953585	0.922879	1	X.ATKRRKHPIGRSAVIPMEL.X	DECOY1_Solyc08g005100_22356
query:21282;rank:1	-0.953636	0.92545	1	X.ALGRVVLLCLLMNLSIIELFTVSPLLTLIM.X	DECOY1_Solyc02g068080_6268
query:6928;rank:1	-0.953636	0.92545	1	X.RKEGSTMLISVAGVSG.X	DECOY1_Solyc01g107190_4656
query:14012;rank:1	-0.953683	0.925926	1	X.SMVFESSSLSSSHKYT.X	DECOY0_Solyc03g121610_11733
query:6394;rank:1	-0.953683	0.925926	1	X.LIKFILWEDEFI.X	DECOY0_Solyc01g007610_1149
query:6803;rank:1	-0.953723	0.925926	1	X.LISHADRSLVNLT.X	DECOY0_Solyc03g083700_10163
query:6192;rank:1	-0.953723	0.925926	1	X.KVVSLKVRAAKVAS.X	DECOY1_Solyc08g014440_22782
query:3753;rank:1	-0.953723	0.925926	1	X.NESFMRTDRN.X	DECOY0_Solyc11g044860_31305
query:17861;rank:1	-0.953779	0.92848	1	X.KNSSNDSDPTFHDQHLTSKEY.X	DECOY0_Solyc11g066600_31773
query:15941;rank:1	-0.953779	0.92848	1	X.TYLPAKSPTIRSSLQYYVRFV.X	DECOY0_Solyc03g121170_11689
query:9401;rank:1	-0.953861	0.929847	1	X.KSLGMKMKKERLAQQ.X	DECOY0_Solyc10g084330_29617
query:1074;rank:1	-0.953861	0.929847	1	X.PQTLVIMGT.X	DECOY0_Solyc10g049680_28463
query:11088;rank:1	-0.953874	0.929936	1	X.FSKIIQDITTKIKTAP.X	DECOY1_Solyc11g068600_31874
query:13177;rank:1	-0.953969	0.930607	1	X.VTLVGKVGSFMVTETKKHQG.X	DECOY1_Solyc06g008940_17334
query:22090;rank:1	-0.953999	0.930607	1	X.VAMVDVSSATASSRSPDWGITEGTSPALPFGN.X	DECOY0_Solyc03g071590_9853
query:10917;rank:1	-0.953999	0.930607	1	X.TILIVIYRQKMNDPKN.X	DECOY0_Solyc07g017560_20407
query:5265;rank:1	-0.954065	0.930607	1	X.LVNKIIVHPLDDG.X	DECOY1_Solyc09g074280_26584
query:17332;rank:1	-0.954137	0.930607	1	X.GRKVGGNKVFLVLMTGRMKSSLKVG.X	DECOY1_Solyc04g058060_13532
query:7124;rank:1	-0.95416	0.930607	1	X.KTTLPAVLVSSRAKA.X	DECOY1_Solyc05g053650_16746
query:10065;rank:1	-0.95423	0.930607	1	X.SPSSHMTNTISIN.X	DECOY0_Solyc03g078160_9911
query:13243;rank:1	-0.954275	0.930607	1	X.DDMDIPEEEERDDPALIAP.X	DECOY1_Solyc03g117120_11286
query:11748;rank:1	-0.954329	0.930607	1	X.LGKQLLDLKMVMKLKHD.X	DECOY0_Solyc06g065730_18671
query:4447;rank:1	-0.954329	0.930607	1	X.TTVFRAEAKKTP.X	DECOY0_Solyc07g019480_20497
query:1659;rank:1	-0.954329	0.930607	1	X.TYIAKLVKD.X	DECOY1_Solyc11g005440_29906
query:11624;rank:1	-0.954414	0.930607	1	X.IIQPAILSWGQGPTNLII.X	DECOY1_Solyc08g005280_22374
query:19450;rank:1	-0.954428	0.930607	1	X.YMVSNASYDAASPNTKDGDNGPAGRTVGT.X	DECOY0_Solyc04g009510_12231
query:22748;rank:1	-0.954541	0.930607	1	X.QPLFTDVKNSLFFKLIGEGDVKSVYGVPYQPTKRMG.X	DECOY1_Solyc11g069280_31942
query:5038;rank:1	-0.954541	0.930607	1	X.SSASYCPPLEGG.X	DECOY0_Solyc11g044560_31277
query:17158;rank:1	-0.954552	0.930607	1	X.GSAPSGSIVTKWVIGTLMNSPIGAF.X	DECOY1_Solyc00g019730_288
query:12052;rank:1	-0.954552	0.930607	1	X.KVAKSRKTPLKMDDLRGN.X	DECOY0_Solyc12g099920_34683
query:10665;rank:1	-0.954552	0.930607	1	X.SQSRSASMGSPCPPSQ.X	DECOY1_Solyc09g011690_25368
query:7865;rank:1	-0.95469	0.930607	1	X.TVVKVIYDFATRDF.X	DECOY1_Solyc06g009280_17368
query:3577;rank:1	-0.95469	0.930607	1	X.IPIDKKRKRN.X	DECOY1_Solyc01g065930_2444
query:6293;rank:1	-0.954732	0.930607	1	X.SGTAIGSVGGGDSS.X	DECOY0_Solyc04g015100_12489
query:9220;rank:1	-0.954922	0.930779	1	X.ASAAMLHTLALLLIAGLN.X	DECOY0_Solyc09g098340_27289
query:15580;rank:1	-0.954924	0.930779	1	X.TIAFLSIFMLIKDDWRESFV.X	DECOY1_Solyc10g044640_28174
query:13828;rank:1	-0.955018	0.930864	1	X.LEVLMKDMHKGKILYEVS.X	DECOY0_Solyc03g026030_9033
query:5274;rank:1	-0.955104	0.933905	1	X.LKILNKRQIPPN.X	DECOY1_Solyc12g098910_34582
query:3695;rank:1	-0.955104	0.933905	1	X.KVLGPSRHLYL.X	DECOY0_Solyc06g062810_18479
query:2552;rank:1	-0.955104	0.933905	1	X.MGVFIQNRVN.X	DECOY0_Solyc02g014420_5313
query:89;rank:1	-0.955104	0.933905	1	X.NVHARTN.X	DECOY1_Solyc02g079470_7008
query:22996;rank:1	-0.955122	0.933905	1	X.LLSYPVAVPPQSAFFPSRTQKMATTYKTAAAFELVPE.X	DECOY1_Solyc07g039430_20856
query:20228;rank:1	-0.955122	0.933905	1	X.VEEMQTHIAQMNNLESSTQEASLQGS.X	DECOY1_Solyc08g015870_22822
query:10815;rank:1	-0.955122	0.933905	1	X.SSNRFGCSIMFLLVSLF.X	DECOY1_Solyc00g147570_730
query:1720;rank:1	-0.955208	0.933905	1	X.DLSYACIAAK.X	DECOY1_Solyc12g017440_32990
query:5031;rank:1	-0.955242	0.933905	1	X.VSVVKGRDGVYLN.X	DECOY1_Solyc11g007960_30156
query:4407;rank:1	-0.95532	0.934146	1	X.KNQIASTMQVK.X	DECOY0_Solyc03g121810_11753
query:1568;rank:1	-0.95532	0.934146	1	X.CKSSAYTDY.X	DECOY0_Solyc01g095580_3599
query:11823;rank:1	-0.955381	0.934146	1	X.AKGMSPVAEMLKKKVPSH.X	DECOY1_Solyc05g013190_15338
query:19906;rank:1	-0.955494	0.936585	1	X.FLSEQIAMKTSSKMRDSMLLKANFSTN.X	DECOY0_Solyc06g082920_19681
query:13970;rank:1	-0.955494	0.936585	1	X.RTSPTPPPISTPSSVS.X	DECOY1_Solyc10g007070_27522
query:22294;rank:1	-0.955519	0.939024	1	X.LDREALMAALPKSEAQESYLLCKLSVPEVVLIFV.X	DECOY0_Solyc05g006760_14797
query:20612;rank:1	-0.955519	0.939024	1	X.KDTLEGGRALIMGIAVYNIVTNLLKWGIQ.X	DECOY1_Solyc01g104250_4362
query:16678;rank:1	-0.955589	0.941535	1	X.DSANVPSSPASNTEDNPSSPLT.X	DECOY0_Solyc08g067770_23761
query:15935;rank:1	-0.955589	0.941535	1	X.DDDSSYVDVFQEPIVDLEEN.X	DECOY0_Solyc10g049740_28469
query:4926;rank:1	-0.955589	0.941535	1	X.AAIIALKSAGINSS.X	DECOY0_Solyc11g042610_31185
query:14891;rank:1	-0.955657	0.944175	1	X.KVSEILMSHFMYCSSSS.X	DECOY1_Solyc09g056180_25988
query:10068;rank:1	-0.955657	0.944175	1	X.GALLARLPTAPRDTSYS.X	DECOY1_Solyc03g096790_10464
query:5751;rank:1	-0.955657	0.944175	1	X.SHKTYQFLISTY.X	DECOY0_Solyc07g063400_22021
query:3023;rank:1	-0.955657	0.944175	1	X.PSCSVCASCACN.X	DECOY0_Solyc03g121190_11691
query:279;rank:1	-0.955657	0.944175	1	X.KVFSAPAN.X	DECOY1_Solyc02g094230_8474
query:12079;rank:1	-0.955716	0.944242	1	X.VSRTSSTCTSPSTST.X	DECOY0_Solyc02g084590_7517
query:23057;rank:1	-0.95578	0.945455	1	X.NRDKTRYTWKLVKDIRIDLTYTSYMEAIEEDPIL.X	DECOY0_Solyc03g123520_11825
query:18116;rank:1	-0.955795	0.945586	1	X.KIVVTVDQQFIIIHMIFAYIIII.X	DECOY1_Solyc06g019130_17550
query:4685;rank:1	-0.955795	0.945586	1	X.RTIRTVSRIGTN.X	DECOY1_Solyc03g005550_8584
query:22100;rank:1	-0.955815	0.946924	1	X.PDSRSVNVMVRMALGGAKAAHRLQYLASMPITSIGG.X	DECOY1_Solyc10g085380_29722
query:8480;rank:1	-0.955815	0.946924	1	X.LSVSAADLGVVGTMS.X	DECOY0_Solyc01g079890_2833
query:1306;rank:1	-0.955815	0.946924	1	X.KTPLSIYV.X	DECOY1_Solyc08g022130_22940
query:12765;rank:1	-0.955875	0.948441	1	X.RLRMKLTKTLLPIANEE.X	DECOY1_Solyc02g072550_6714
query:3493;rank:1	-0.955875	0.948441	1	X.RADSSDGRRKGG.X	DECOY0_Solyc01g098220_3863
query:14969;rank:1	-0.955914	0.948441	1	X.IDFKSVLKGPPLIIKDKKAAN.X	DECOY1_Solyc10g011870_27802
query:5730;rank:1	-0.955914	0.948441	1	X.LLLDDATVRLIDE.X	DECOY1_Solyc11g069380_31952
query:2311;rank:1	-0.955933	0.948441	1	X.IVKKVLRDS.X	DECOY1_Solyc03g110880_10670
query:13647;rank:1	-0.956013	0.948441	1	X.MEELPCPLGPTGIRQLNAVR.X	DECOY1_Solyc00g215560_802
query:17838;rank:1	-0.956071	0.949701	1	X.VGIIIKRKVDAPQSVVMKDKSIVF.X	DECOY0_Solyc12g098100_34501
query:14106;rank:1	-0.956071	0.949701	1	X.CPALSQLRKVFFGVATVYALS.X	DECOY0_Solyc02g078630_6925
query:21015;rank:1	-0.956161	0.950119	1	X.ASSCKSDGDSSCNRRVRSTRYAARMIN.X	DECOY0_Solyc05g039940_16075
query:9013;rank:1	-0.956161	0.950119	1	X.LWGSTGSPIGGALVSAIW.X	DECOY1_Solyc01g087810_3122
query:7839;rank:1	-0.956161	0.950119	1	X.VSPPPILFGNLPLPPN.X	DECOY1_Solyc01g088730_3214
query:9877;rank:1	-0.956209	0.950119	1	X.RVEAILAKAKITREIAA.X	DECOY0_Solyc09g014980_25495
query:1308;rank:1	-0.956212	0.950119	1	X.KRSVPSNVN.X	DECOY1_Solyc03g114380_11012
query:17486;rank:1	-0.956348	0.950119	1	X.SDKIELMVPERLRHFVSSQFST.X	DECOY0_Solyc08g069180_23899
query:5711;rank:1	-0.956348	0.950119	1	X.VLFAIGLFGTKAFV.X	DECOY0_Solyc07g063400_22021
query:19441;rank:1	-0.956447	0.951306	1	X.TFVLQSPSLRSQSKTFLQNFPTRLTN.X	DECOY1_Solyc03g013420_8870
query:23676;rank:1	-0.956486	0.952103	1	X.GFIITFFWGLWLPELVAMFVYHLGGISRGGSKMAAEKKAEARV.X	DECOY1_Solyc07g054490_21638
query:17399;rank:1	-0.956486	0.952103	1	X.ILLLISIVSFIPALVLIGAVLSKVI.X	DECOY1_Solyc12g005670_32314
query:17287;rank:1	-0.956486	0.952103	1	X.TIWLVKTIKLGIKLTRKARQHS.X	DECOY1_Solyc09g018670_25654
query:7157;rank:1	-0.956486	0.952103	1	X.LTGMILAPVSLWLN.X	DECOY0_Solyc10g017700_27883
query:17103;rank:1	-0.956509	0.952103	1	X.MPTEKKLVMVPKKTPQPHSEKL.X	DECOY1_Solyc02g088580_7914
query:10829;rank:1	-0.956608	0.952103	1	X.VLNKKSIVSKVVRLLKN.X	DECOY0_Solyc05g009830_15103
query:8769;rank:1	-0.956608	0.952103	1	X.MPELLFKKKSIKRN.X	DECOY0_Solyc11g013040_30561
query:18083;rank:1	-0.956624	0.952103	1	X.PMHLFGTHGSQAYMIKSTSSSSC.X	DECOY0_Solyc04g081360_14457
query:5865;rank:1	-0.956624	0.952103	1	X.ALVVLLTSVRKLL.X	DECOY0_Solyc12g006150_32361
query:16855;rank:1	-0.956638	0.952103	1	X.GSHKSSDFSNSFEQFRKEAAN.X	DECOY1_Solyc09g098370_27292
query:19032;rank:1	-0.956707	0.952103	1	X.SLTIKACLHAANISRSKDDMTDWQLT.X	DECOY0_Solyc07g017940_20445
query:21994;rank:1	-0.956733	0.952103	1	X.SFRNEEDTLKILGMLEKGVCTVTTEIVAMVEN.X	DECOY1_Solyc01g007920_1180
query:16092;rank:1	-0.956806	0.952103	1	X.PWPSTFDRAVKNGGGGGAVGVSPIT.X	DECOY0_Solyc06g073020_19195
query:19129;rank:1	-0.956828	0.952103	1	X.NSWPHAPAFTNSYTLTKFLSSLTN.X	DECOY1_Solyc03g118500_11424
query:19364;rank:1	-0.956924	0.953326	1	X.RGLVKSTFCLLEVKESLTIDKEKILK.X	DECOY0_Solyc01g087640_3105
query:2450;rank:1	-0.956924	0.953326	1	X.IYATPLISAM.X	DECOY1_Solyc10g011670_27782
query:13007;rank:1	-0.957004	0.95338	1	X.PSTFNRLESLKLSSPIKM.X	DECOY1_Solyc03g078490_9942
query:12529;rank:1	-0.957019	0.953488	1	X.ASDLLPLYAVARLLKALSAN.X	DECOY0_Solyc03g115510_11125
query:1951;rank:1	-0.957019	0.953488	1	X.QIFMKGKTE.X	DECOY1_Solyc01g088690_3210
query:8170;rank:1	-0.957038	0.953542	1	X.IVQINLLQTAMILR.X	DECOY0_Solyc02g076650_6727
query:21212;rank:1	-0.957103	0.954704	1	X.SPPPTIPSTPSITSPSITSDIIGPTPGN.X	DECOY0_Solyc10g007800_27595
query:20115;rank:1	-0.957176	0.958237	1	X.MPPSSPSSLTSASVTSCTRGIPPTQGL.X	DECOY1_Solyc06g010200_17458
query:18124;rank:1	-0.957176	0.958237	1	X.RRININFMRSTPELFLRAIAVTV.X	DECOY1_Solyc09g098410_27296
query:15139;rank:1	-0.957176	0.958237	1	X.VPKTPPQVKYESKSLPVPKD.X	DECOY1_Solyc12g049150_33812
query:13138;rank:1	-0.957176	0.958237	1	X.YSTMEMTIIVDNRQGKI.X	DECOY0_Solyc01g111760_5111
query:18117;rank:1	-0.957202	0.959584	1	X.PANPIRSLSMPVPVLTPPIPAPPPPPAS.X	DECOY1_Solyc01g110820_5018
query:5670;rank:1	-0.957202	0.959584	1	X.QPPTRQRMSKR.X	DECOY1_Solyc02g061960_5858
query:4911;rank:1	-0.957202	0.959584	1	X.LCKRSMRRKSN.X	DECOY0_Solyc10g018440_27955
query:2594;rank:1	-0.957202	0.959584	1	X.ALPLVVVTQIK.X	DECOY1_Solyc03g013160_8844
query:4501;rank:1	-0.95721	0.959584	1	X.SPSLNKVITLSI.X	DECOY1_Solyc12g026400_33172
query:9835;rank:1	-0.957315	0.959631	1	X.SIRITNPVSRKSRKK.X	DECOY0_Solyc11g012020_30459
query:20599;rank:1	-0.9574	0.961938	1	X.LEVLFLQQALSRVAAAGKLVPRKRILLLIN.X	DECOY0_Solyc02g067010_6161
query:5833;rank:1	-0.9574	0.961938	1	X.ISTKVMGELGKALG.X	DECOY1_Solyc03g122100_11782
query:9648;rank:1	-0.9574	0.961982	1	X.QQDSPAYSAGAARATFN.X	DECOY0_Solyc03g114110_10985
query:19099;rank:1	-0.957453	0.963218	1	X.KSSSSPSSRSSSEVDQPELAVSDS.X	DECOY0_Solyc04g082480_14569
query:6359;rank:1	-0.957453	0.963218	1	X.KKFLPSKRTLSP.X	DECOY0_Solyc07g052730_21465
query:4048;rank:1	-0.957453	0.963218	1	X.TQSHIMSQSN.X	DECOY0_Solyc07g042790_21077
query:20200;rank:1	-0.957495	0.964208	1	X.KKFECRPLPEDVKQVGTGEWNNDWIRN.X	DECOY1_Solyc06g068450_18840
query:13704;rank:1	-0.9575	0.964208	1	X.SPLGPLYGSDPARRLELISP.X	DECOY1_Solyc05g007030_14824
query:17360;rank:1	-0.957591	0.964208	1	X.PTTGTQGGSSISMHTPEMRYASQ.X	DECOY0_Solyc05g018260_15729
query:12133;rank:1	-0.957591	0.964208	1	X.GSKNSIFAPNSFFKIDMM.X	DECOY0_Solyc03g044840_9407
query:16584;rank:1	-0.957591	0.964208	1	X.PLVIPNRSVITLLATLSPAILPVP.X	DECOY1_Solyc09g064260_26282
query:5342;rank:1	-0.957591	0.964208	1	X.LTSDLYVPSLDH.X	DECOY1_Solyc06g009480_17388
query:17740;rank:1	-0.957599	0.964208	1	X.AIRLATSPFTPNKRLIRNGDSFI.X	DECOY1_Solyc00g058280_500
query:8156;rank:1	-0.957781	0.964208	1	X.PAAAIQPEAPEDNQPTG.X	DECOY1_Solyc04g080590_14380
query:7673;rank:1	-0.957797	0.964208	1	X.WEVSNSAQCSYM.X	DECOY0_Solyc04g025430_12815
query:5443;rank:1	-0.957797	0.964208	1	X.GFSDRRHLYNKG.X	DECOY1_Solyc09g075800_26736
query:3671;rank:1	-0.957797	0.964208	1	X.IPKLVTNLGVF.X	DECOY0_Solyc01g097420_3783
query:5429;rank:1	-0.957867	0.964208	1	X.ELKTTSASSGDL.X	DECOY1_Solyc09g090270_26986
query:16102;rank:1	-0.957896	0.964208	1	X.TRIELLMVDKKYKVMIAVKVN.X	DECOY1_Solyc08g069010_23882
query:5451;rank:1	-0.957972	0.964208	1	X.QLRTMYTAFGFV.X	DECOY1_Solyc03g083410_10134
query:13504;rank:1	-0.957995	0.964208	1	X.QIALSIENYMRLLEFLEL.X	DECOY1_Solyc09g014890_25486
query:20217;rank:1	-0.958005	0.964208	1	X.IPVSFGIALSGLIHCGFHVHHLRIDKSNI.X	DECOY0_Solyc09g098420_27297
query:5807;rank:1	-0.958005	0.964208	1	X.SIKKFLSIIGYM.X	DECOY1_Solyc09g098190_27274
query:12230;rank:1	-0.958067	0.964208	1	X.KVPKYVYGVRVRVKRGS.X	DECOY0_Solyc09g056130_25983
query:6510;rank:1	-0.958067	0.964208	1	X.EKVRKAKEQAEEE.X	DECOY1_Solyc04g048900_13046
query:23181;rank:1	-0.958163	0.964208	1	X.ASISGSVSLMIRRLTSFLVLLNVLECGINTVFLTAEARNM.X	DECOY0_Solyc07g006120_19965
query:17048;rank:1	-0.958163	0.964208	1	X.AASVSAVFNFCGLLTWISIIYTAW.X	DECOY0_Solyc11g017190_30675
query:10724;rank:1	-0.958193	0.964208	1	X.KESWPVEIELTMTPRGG.X	DECOY0_Solyc08g078630_24335
query:4863;rank:1	-0.958193	0.964208	1	X.VLVFLILLVLVF.X	DECOY0_Solyc12g063000_34089
query:16024;rank:1	-0.958258	0.964208	1	X.EVGDVLDKFMNVMFKCTRILQ.X	DECOY1_Solyc02g091660_8218
query:9837;rank:1	-0.958282	0.964208	1	X.SSSGTSFYSSNS.X	DECOY0_Solyc05g015950_15609
query:14469;rank:1	-0.958391	0.964208	1	X.DELKAGIQILGARTEIRLQN.X	DECOY0_Solyc03g093970_10289
query:13416;rank:1	-0.95842	0.964208	1	X.LAATRKNMLPKAKYASVLD.X	DECOY0_Solyc06g071870_19081
query:14740;rank:1	-0.95842	0.964208	1	X.KSIAAERIVSITLTILNWFV.X	DECOY0_Solyc02g087870_7843
query:2577;rank:1	-0.958448	0.964208	1	X.EVTVILVVHGN.X	DECOY1_Solyc08g062970_23488
query:13300;rank:1	-0.958558	0.964208	1	X.AWPPIPSNPRVKPMPTPFAA.X	DECOY1_Solyc05g005080_14630
query:8399;rank:1	-0.958589	0.964208	1	X.LDKRTDFMLAAALVR.X	DECOY0_Solyc01g110320_4967
query:20151;rank:1	-0.958639	0.964208	1	X.EKFTPGLKTPLADDIILLLVAPLLSYIGSF.X	DECOY0_Solyc04g014390_12419
query:8158;rank:1	-0.958639	0.964208	1	X.LPGAGCSLLLAAVGRDL.X	DECOY0_Solyc02g070410_6501
query:18730;rank:1	-0.958696	0.964208	1	X.KQNVPALAPDILVEHEVQEKSLSNST.X	DECOY1_Solyc10g086000_29784
query:15346;rank:1	-0.958696	0.964208	1	X.ARTGSSRAVTYRTHAITNG.X	DECOY0_Solyc12g019000_33041
query:10900;rank:1	-0.95883	0.964208	1	X.LPSASETTALDDELEN.X	DECOY0_Solyc08g061250_23323
query:8163;rank:1	-0.958834	0.964208	1	X.TGMVPEPPIISLIY.X	DECOY0_Solyc11g030460_30987
query:14741;rank:1	-0.958886	0.964208	1	X.KVNHNNGKEGDKHIHMARLR.X	DECOY0_Solyc01g066020_2453
query:6101;rank:1	-0.958886	0.964208	1	X.LSSGGRLQFAPNAQ.X	DECOY0_Solyc08g008130_22653
query:13555;rank:1	-0.958925	0.964208	1	X.LPQGGQDMRRSVDISPTCLL.X	DECOY1_Solyc04g039950_12960
query:4663;rank:1	-0.958925	0.964208	1	X.IFNTNQTYKQN.X	DECOY0_Solyc12g009220_32569
query:12775;rank:1	-0.958972	0.964208	1	X.EKISGSEGFSLIYTLIACN.X	DECOY1_Solyc02g072130_6672
query:4173;rank:1	-0.958972	0.964208	1	X.APRASIARLGLI.X	DECOY0_Solyc00g025540_359
query:1098;rank:1	-0.958972	0.964208	1	X.AIRHRGHGG.X	DECOY1_Solyc00g036540_440
query:21420;rank:1	-0.958986	0.964208	1	X.KKKRKRNSSSHSTDSIARQCSCSSRSSVSENR.X	DECOY0_Solyc07g062920_21973
query:19544;rank:1	-0.959085	0.964208	1	X.QPVELKVKDMGDECCRRVKVNARRMK.X	DECOY1_Solyc02g091300_8182
query:2004;rank:1	-0.95911	0.964208	1	X.LVLVVPSAVN.X	DECOY0_Solyc11g015890_30647
query:16120;rank:1	-0.959184	0.964208	1	X.SPNARVPKDLEKNAESLKILQ.X	DECOY0_Solyc07g053220_21513
query:9461;rank:1	-0.959184	0.964208	1	X.KQESQRSLAVLERRN.X	DECOY1_Solyc08g005200_22366
query:10928;rank:1	-0.959249	0.964208	1	X.SKRQRTVQLLLQIFG.X	DECOY0_Solyc04g012190_12397
query:5113;rank:1	-0.959249	0.964208	1	X.LLGTSPTAGVVHW.X	DECOY0_Solyc06g051860_18087
query:21390;rank:1	-0.959382	0.964323	1	X.VVSGKKKTSEERINSQEGKRSEVGGSSGREKP.X	DECOY0_Solyc12g010820_32729
query:18104;rank:1	-0.959382	0.964323	1	X.SDGYRVSVAGMLSALLVFLSVASF.X	DECOY1_Solyc01g094040_3446
query:15877;rank:1	-0.959382	0.964323	1	X.LIQVAALAVRKTPSLKSQTSKEN.X	DECOY0_Solyc12g013910_32839
query:3573;rank:1	-0.959387	0.964323	1	X.AFLVLLAAGFVF.X	DECOY1_Solyc07g052400_21432
query:15211;rank:1	-0.959402	0.964323	1	X.VRNTKSPAKISIEIFIESMLL.X	DECOY1_Solyc04g071150_13642
query:21448;rank:1	-0.959497	0.964323	1	X.GARRFTSGCLLGLAMLCLVALGLVFLTKMVTMG.X	DECOY0_Solyc01g098500_3891
query:4160;rank:1	-0.959497	0.964323	1	X.FNIREYMITN.X	DECOY0_Solyc08g005610_22407
query:17350;rank:1	-0.959525	0.964323	1	X.KRDSSQSLTPSTTQSSTQT.X	DECOY1_Solyc12g043020_33704
query:11644;rank:1	-0.959525	0.964323	1	X.VVVDLQIKTRIVKVPNN.X	DECOY1_Solyc08g043140_23130
query:16903;rank:1	-0.95958	0.964323	1	X.ANNQSSTCGPSGRSNGCHKLDS.X	DECOY1_Solyc07g009130_20266
query:3913;rank:1	-0.95958	0.964323	1	X.TYTSKLEDLLI.X	DECOY0_Solyc08g066360_23623
query:19336;rank:1	-0.959592	0.964323	1	X.LLSSNSSEMKAGIRTNGSSRAENVLRI.X	DECOY0_Solyc02g085050_7563
query:17336;rank:1	-0.959592	0.964323	1	X.TESCKTLMSNNPATVTANAET.X	DECOY1_Solyc01g111870_5122
query:401;rank:1	-0.959592	0.964323	1	X.VVSETAFV.X	DECOY0_Solyc01g005910_979
query:12511;rank:1	-0.959663	0.964323	1	X.YSAKKTGLTNADTSPVSLTSG.X	DECOY1_Solyc03g026120_9042
query:16318;rank:1	-0.959778	0.964323	1	X.RQQLRFASGMSVLGVIVVAVAHVS.X	DECOY0_Solyc04g079520_14277
query:19034;rank:1	-0.959801	0.964323	1	X.QEVWIFLSKQNMMVNAMNSQVVRPT.X	DECOY0_Solyc09g098460_27301
query:15415;rank:1	-0.959801	0.964323	1	X.VLGTTGIGRLFKIPNNQEKKH.X	DECOY1_Solyc08g014340_22774
query:4436;rank:1	-0.959939	0.964323	1	X.PSLVPLLPRCSS.X	DECOY0_Solyc02g078030_6865
query:4192;rank:1	-0.959939	0.964323	1	X.VLLTRQPTISN.X	DECOY0_Solyc07g043450_21141
query:22672;rank:1	-0.959973	0.964323	1	X.PGIFNSYSNTSIKLFHGVSLSSTSQSESLSGKDR.X	DECOY1_Solyc11g013470_30604
query:6734;rank:1	-0.959973	0.964323	1	X.LDSTRKLTALEHQ.X	DECOY0_Solyc07g045370_21231
query:9815;rank:1	-0.959976	0.964323	1	X.GCRIARMIDTGASTSNT.X	DECOY1_Solyc07g066550_22332
query:6817;rank:1	-0.960075	0.964323	1	X.FRLSPLSPLIQDTI.X	DECOY0_Solyc07g037950_20817
query:11074;rank:1	-0.960215	0.964323	1	X.SVSSTSAKTSSTT.X	DECOY0_Solyc09g072980_26553
query:12632;rank:1	-0.960273	0.964323	1	X.GSSKLCTSSPTKQPIDRRM.X	DECOY0_Solyc11g010330_30293
query:19887;rank:1	-0.960354	0.964323	1	X.SRKTSKRSSSSSSSSKKLSGTN.X	DECOY1_Solyc03g121400_11712
query:15607;rank:1	-0.960354	0.964323	1	X.SYNVENGYAELLMFFPLVKCL.X	DECOY1_Solyc11g011410_30398
query:2691;rank:1	-0.960372	0.964323	1	X.QYGDQHSHLL.X	DECOY1_Solyc08g028870_23008
query:5106;rank:1	-0.96045	0.964323	1	X.DPALAVFKAKIEI.X	DECOY1_Solyc00g134830_712
query:17495;rank:1	-0.960492	0.965553	1	X.QKMIVKVVAIFMLCPIALFSSCNM.X	DECOY0_Solyc05g007000_14821
query:4655;rank:1	-0.960492	0.965553	1	X.FNPINIKTGATN.X	DECOY0_Solyc08g066260_23613
query:3221;rank:1	-0.960492	0.965553	1	X.SVNIQVYLLN.X	DECOY1_Solyc03g118940_11466
query:5901;rank:1	-0.960545	0.965553	1	X.QSTTASTIDSP.X	DECOY1_Solyc05g007030_14824
query:3295;rank:1	-0.960545	0.965553	1	X.GFVEDPPVIHH.X	DECOY1_Solyc10g019210_28026
query:14928;rank:1	-0.960571	0.965553	1	X.SGKSILSITVVRGPILINDFIQ.X	DECOY1_Solyc12g098870_34578
query:17335;rank:1	-0.96063	0.966667	1	X.MTTMMMMMMMTMMMMMIST.X	DECOY1_Solyc07g026760_20708
query:2426;rank:1	-0.96063	0.966667	1	X.IKGVEQHEIT.X	DECOY1_Solyc06g068090_18804
query:2253;rank:1	-0.96063	0.966667	1	X.PLRNSEWLI.X	DECOY0_Solyc04g082440_14565
query:6460;rank:1	-0.96064	0.967708	1	X.ITHVVTASNARRS.X	DECOY0_Solyc06g024290_17567
query:17524;rank:1	-0.96067	0.967742	1	X.KSKEVDKHYLEGIVYEQLISQTV.X	DECOY1_Solyc04g014650_12444
query:9251;rank:1	-0.960736	0.967775	1	X.KLFEVKIPKCPIPIGN.X	DECOY0_Solyc07g064020_22083
query:13493;rank:1	-0.960768	0.969886	1	X.SLVMIYMASTSTKSEN.X	DECOY0_Solyc07g052430_21435
query:4032;rank:1	-0.960768	0.969886	1	X.NDHTSMSMN.X	DECOY0_Solyc12g009340_32581
query:1682;rank:1	-0.960768	0.969886	1	X.GLARMPITP.X	DECOY1_Solyc03g115440_11118
query:23329;rank:1	-0.960769	0.973817	1	X.AVVFTMTSGETDEERIMAIVDDDVKTGKLSSLITVS.X	DECOY0_Solyc01g090750_3317
query:17839;rank:1	-0.960769	0.973817	1	X.DRLDKIEGGPLMPRKKIQMLLLSD.X	DECOY1_Solyc02g087220_7778
query:10800;rank:1	-0.960769	0.973817	1	X.SSIGIDLVVGLVRLAQDT.X	DECOY1_Solyc01g091080_3350
query:9914;rank:1	-0.960769	0.973817	1	X.GASKGNSPSPGVHQTPRV.X	DECOY1_Solyc01g108430_4778
query:9445;rank:1	-0.960831	0.973817	1	X.YTTAMHKGLLRGALSL.X	DECOY1_Solyc03g005530_8582
query:8060;rank:1	-0.960831	0.973817	1	X.GIHLISSAVGAGLLSAID.X	DECOY1_Solyc03g025840_9014
query:2186;rank:1	-0.960831	0.973817	1	X.GAPKTTAGPGLSG.X	DECOY0_Solyc01g111320_5067
query:285;rank:1	-0.960831	0.973817	1	X.LRIFATN.X	DECOY1_Solyc11g043130_31234
query:19102;rank:1	-0.960906	0.973817	1	X.SPKSETRNVFVLAMQCALAKTEPNRK.X	DECOY1_Solyc07g051810_21376
query:7764;rank:1	-0.960906	0.973817	1	X.LFAVMLVIAYSALKL.X	DECOY1_Solyc01g060450_2396
query:6621;rank:1	-0.960906	0.973817	1	X.SSRSSMNSPDN.X	DECOY0_Solyc02g086130_7669
query:5266;rank:1	-0.960906	0.973817	1	X.TLVILLVINLAHN.X	DECOY0_Solyc12g040820_33589
query:1325;rank:1	-0.960906	0.973817	1	X.GNLSKERSN.X	DECOY1_Solyc11g028250_30968
query:14192;rank:1	-0.960926	0.973817	1	X.RIIRSEVLGMSFAPWTSVIN.X	DECOY1_Solyc03g005650_8594
query:2914;rank:1	-0.960926	0.973817	1	X.SGRRRKADLGT.X	DECOY0_Solyc07g017520_20403
query:19868;rank:1	-0.960967	0.973817	1	X.FDSSRFPASISAVKLSSSSGSDQML.X	DECOY0_Solyc05g039960_16077
query:12228;rank:1	-0.960967	0.973817	1	X.KPVKVNPKGVKFKDMLSR.X	DECOY1_Solyc00g025650_360
query:3859;rank:1	-0.961022	0.973817	1	X.QINAGKSKILGY.X	DECOY0_Solyc12g038430_33455
query:15286;rank:1	-0.961066	0.973817	1	X.LIRSVKVESGRIAKLISHSIK.X	DECOY0_Solyc01g007010_1089
query:7352;rank:1	-0.961066	0.973817	1	X.FGVHLGRHGKLVAFV.X	DECOY1_Solyc03g044830_9406
query:9038;rank:1	-0.961117	0.973817	1	X.LIYRGPFIAISHHFC.X	DECOY1_Solyc07g009150_20268
query:468;rank:1	-0.961165	0.973817	1	X.PQVMDRV.X	DECOY0_Solyc09g055210_25895
query:12509;rank:1	-0.961182	0.973817	1	X.NTVIDKGFRRVVGALLFL.X	DECOY1_Solyc12g099070_34598
query:6791;rank:1	-0.961182	0.973817	1	X.NGLQSRIKFIPPNN.X	DECOY0_Solyc09g011040_25303
query:6055;rank:1	-0.961212	0.973817	1	X.GFMMDVYLRIRS.X	DECOY0_Solyc06g050630_17969
query:21868;rank:1	-0.961264	0.973817	1	X.GALSSCSIVIFKQLDMAMGTKIYLLWALLGEWV.X	DECOY0_Solyc05g041540_16135
query:8620;rank:1	-0.961264	0.973817	1	X.GSRIILSTRLKIPHA.X	DECOY1_Solyc07g009190_20272
query:17290;rank:1	-0.961308	0.973817	1	X.SKSVLAAAYRGQIKMNTVQSEHSA.X	DECOY1_Solyc10g007770_27592
query:5563;rank:1	-0.961308	0.973817	1	X.ESQKFIGSIRWN.X	DECOY0_Solyc01g106480_4585
query:16620;rank:1	-0.961321	0.973817	1	X.MMIGFSGLIGEGGRTNIVLAVENIS.X	DECOY0_Solyc11g062070_31523
query:14168;rank:1	-0.961363	0.973817	1	X.LKSQMYHLRVTKDTSKATS.X	DECOY0_Solyc04g079600_14285
query:4200;rank:1	-0.961363	0.973817	1	X.YTGFPLIVELVA.X	DECOY0_Solyc08g080170_24485
query:1613;rank:1	-0.961363	0.973817	1	X.GSSGGGYSTN.X	DECOY0_Solyc02g087370_7793
query:20952;rank:1	-0.961597	0.979879	1	X.ATSGADPGGSNPSASPPAGGNTAKAVAVVASTE.X	DECOY1_Solyc12g013900_32838
query:19826;rank:1	-0.961597	0.979879	1	X.KKEAPAKAPEAAAAKSKGAKKPLKADDGVGAA.X	DECOY0_Solyc12g013510_32799
query:17651;rank:1	-0.961597	0.979879	1	X.LHAIALAHELYGLITVTAGHYTKGAN.X	DECOY0_Solyc12g043110_33713
query:16304;rank:1	-0.961597	0.979879	1	X.TMMMCMMTTMTTTMTMM.X	DECOY1_Solyc00g165080_744
query:14857;rank:1	-0.961597	0.979879	1	X.DKMEYEVVLSMFTFPWS.X	DECOY0_Solyc08g005130_22359
query:13572;rank:1	-0.961597	0.979879	1	X.IAIPNVGQTMAFIFQVLVF.X	DECOY1_Solyc03g093400_10234
query:3844;rank:1	-0.961597	0.979879	1	X.GAEGGPTTTME.X	DECOY1_Solyc12g089020_34290
query:5754;rank:1	-0.961689	0.980885	1	X.GRSGTGKTSLLAFI.X	DECOY1_Solyc11g065720_31686
query:16689;rank:1	-0.961735	0.981891	1	X.GACVGFTLLFDSARILKAARITAN.X	DECOY0_Solyc04g009430_12223
query:153;rank:1	-0.961735	0.982897	1	X.KPMPTPF.X	DECOY1_Solyc05g005080_14630
query:16202;rank:1	-0.961759	0.982915	1	X.YLLTIQTSAMSVGLRLEGRVANN.X	DECOY0_Solyc04g076950_14021
query:8192;rank:1	-0.961784	0.98392	1	X.CRIILSPCILIIVIG.X	DECOY0_Solyc08g077240_24197
query:4859;rank:1	-0.961784	0.983936	1	X.SSLMLLVVTYFV.X	DECOY1_Solyc04g082210_14542
query:15831;rank:1	-0.961859	0.98494	1	X.FVRYHYRVFKTLRSGQILN.X	DECOY1_Solyc05g018460_15748
query:20211;rank:1	-0.961873	0.986961	1	X.PIWMKGDRVFSFGFGLNFLGPKRVPVAE.X	DECOY0_Solyc10g050890_28581
query:13874;rank:1	-0.961873	0.986961	1	X.VERQRQILTVSKGNRFIN.X	DECOY0_Solyc11g009100_30269
query:8024;rank:1	-0.961873	0.986961	1	X.LPGASFKFSRKILLL.X	DECOY1_Solyc02g089710_8026
query:3199;rank:1	-0.961879	0.986987	1	X.NLVSQDSGIVPL.X	DECOY1_Solyc02g091110_8164
query:15751;rank:1	-0.961975	0.986987	1	X.ALRKMWKRADARSHGKMEGLN.X	DECOY1_Solyc05g013410_15360
query:16046;rank:1	-0.962011	0.989066	1	X.SSHGNTDSGVKMVLTSKTGHSLACS.X	DECOY1_Solyc03g111740_10756
query:10394;rank:1	-0.962011	0.989066	1	X.TTTMTTTMTIIMTT.X	DECOY1_Solyc01g018050_1878
query:7819;rank:1	-0.962011	0.989066	1	X.RLVHLLRLIPQPTN.X	DECOY0_Solyc02g069650_6425
query:491;rank:1	-0.962011	0.989066	1	X.LLGSMNVGG.X	DECOY0_Solyc12g009960_32643
query:12126;rank:1	-0.962057	0.989066	1	X.TELLAACMSGATTKSMN.X	DECOY0_Solyc10g017580_27873
query:4969;rank:1	-0.962057	0.989066	1	X.RIFLLWINVEP.X	DECOY0_Solyc12g042610_33665
query:7038;rank:1	-0.96207	0.989066	1	X.EISTDANSSASSK.X	DECOY0_Solyc09g090700_27029
query:1869;rank:1	-0.96207	0.989066	1	X.KLVKSLSH.X	DECOY0_Solyc06g060740_18371
query:20183;rank:1	-0.962149	0.989066	1	X.LRVLSEQFLTLAAHRGTAIAISLPLCTNVM.X	DECOY1_Solyc02g014450_5316
query:6859;rank:1	-0.962156	0.992048	1	X.HFDTTTIMSIT.X	DECOY0_Solyc07g025210_20659
query:1218;rank:1	-0.962156	0.992048	1	X.NAAPPSSLDL.X	DECOY1_Solyc08g083210_24786
query:274;rank:1	-0.962156	0.992048	1	X.GYAFYVN.X	DECOY1_Solyc01g058000_2254
query:22562;rank:1	-0.962165	0.99503	1	X.AYLAPCEHSALELILRTVHVRSLSLQGLDSRSSYSL.X	DECOY0_Solyc02g083900_7451
query:10705;rank:1	-0.962165	0.99503	1	X.AGSSAMSVTKSWNST.X	DECOY0_Solyc05g005910_14713
query:7320;rank:1	-0.962165	0.99503	1	X.SHKHSTSATSSIEIA.X	DECOY0_Solyc08g076020_24081
query:11810;rank:1	-0.962261	0.995054	1	X.LFTIMLASLLFFPVQLY.X	DECOY0_Solyc02g036260_5691
query:10451;rank:1	-0.962261	0.995054	1	X.QFNGGGSIMVSNASPKTN.X	DECOY0_Solyc01g050070_2075
query:9996;rank:1	-0.962261	0.995054	1	X.QNEFGFKALGNAIVKLL.X	DECOY1_Solyc01g096670_3708
query:4853;rank:1	-0.962354	0.995054	1	X.QDPPDLLHIVIQ.X	DECOY0_Solyc10g055650_28847
query:22606;rank:1	-0.962354	0.995054	1	X.NLVNTSLSSNNLSNDAVSSQGLVPNSSLSPPSS.X	DECOY1_Solyc08g029020_23022
query:5321;rank:1	-0.962356	0.995064	1	X.PIGKVGEIAVNNDI.X	DECOY1_Solyc02g086700_7726
query:15660;rank:1	-0.962426	0.995064	1	X.EGKAPPQEALNSSSSSVSSL.X	DECOY1_Solyc01g094640_3506
query:15254;rank:1	-0.962451	0.996055	1	X.QGISNIKRHLTVIVLLSLVLN.X	DECOY0_Solyc10g086600_29843
query:5277;rank:1	-0.962451	0.996055	1	X.IKLRIGPMPTGHN.X	DECOY0_Solyc02g014520_5323
query:8876;rank:1	-0.962546	0.996063	1	X.SLIISFVILLISHCDS.X	DECOY1_Solyc01g094120_3454
query:2534;rank:1	-0.962552	0.996063	1	X.RGSQNVVQQAS.X	DECOY0_Solyc00g034010_433
query:20223;rank:1	-0.962564	0.996075	1	X.KESVKMPRSKVVEKTLLRSSISSRSKGY.X	DECOY0_Solyc03g123860_11859
query:19566;rank:1	-0.962564	0.996075	1	X.ISYIGAMLALKLAFGAMLIAVSYSFIFT.X	DECOY0_Solyc04g005070_11887
query:1905;rank:1	-0.962564	0.996075	1	X.ALNVVAIVMF.X	DECOY1_Solyc03g013560_8884
query:20089;rank:1	-0.962642	0.997062	1	X.VLSLIISLVKLFRLLDPSSFIITSSLKGS.X	DECOY0_Solyc11g064980_31615
query:17773;rank:1	-0.962642	0.997062	1	X.LIAALPASSIAIMIKAIELASPPRII.X	DECOY0_Solyc07g043230_21121
query:11404;rank:1	-0.962642	0.997062	1	X.ASEMGSIKGKGKAAAYSHAN.X	DECOY1_Solyc04g076620_13988
query:20473;rank:1	-0.962702	0.998041	1	X.EYKKGATESFSFKGVLLAIVLGEQSHIVGE.X	DECOY0_Solyc01g099590_3999
query:23578;rank:1	-0.962737	0.99809	1	X.DTGPLLIDIEVFFVTSLTHAMPIMAAINDIVRCYNDTPLPM.X	DECOY0_Solyc09g005210_24827
query:22786;rank:1	-0.962737	0.99809	1	X.VLGLTSAPMITTTSFIASMQINSNNMSPAAKSN.X	DECOY0_Solyc10g085090_29693
query:13146;rank:1	-0.962737	0.99809	1	X.QNYKRDDPKPQKDSPTKN.X	DECOY0_Solyc11g072660_32181
query:5678;rank:1	-0.962737	0.99809	1	X.SGASKDVPALLTKN.X	DECOY0_Solyc03g045060_9429
query:20757;rank:1	-0.96275	0.99809	1	X.SLAVLGLILEYLIFILFILFLCVSTKLYT.X	DECOY1_Solyc06g011590_17498
query:19599;rank:1	-0.96275	0.99809	1	X.VIEYMVLVIVIPLSVWGLKTKLIRCM.X	DECOY0_Solyc03g031570_9087
query:17435;rank:1	-0.96284	0.99809	1	X.MVSCKITQRKEAPNLSVRASNSL.X	DECOY1_Solyc03g031560_9086
query:1205;rank:1	-0.96284	0.99809	1	X.KRNSSVPN.X	DECOY0_Solyc05g054290_16809
query:7116;rank:1	-0.962928	0.99809	1	X.KIAKRTESFEMGE.X	DECOY1_Solyc01g107820_4718
query:2310;rank:1	-0.962948	0.99809	1	X.SKTLVIPAHGGG.X	DECOY0_Solyc06g075610_19453
query:20704;rank:1	-0.962978	0.99809	1	X.KHQESLEIAREAVLICMSNSQVKLTMEV.X	DECOY1_Solyc12g056810_33978
query:7236;rank:1	-0.963116	0.99809	1	X.DALAMVSLLKGLIRN.X	DECOY0_Solyc01g057520_2207
query:22687;rank:1	-0.963118	0.99809	1	X.SNSMEEEERVATEINAFRQQRLFRSTFSEEVF.X	DECOY0_Solyc01g109800_4915
query:16874;rank:1	-0.963118	0.99809	1	X.QNKRKRGKSGKRNGSSCKKIRSN.X	DECOY0_Solyc08g023280_22955
query:13358;rank:1	-0.963118	0.99809	1	X.DSTMTRRSTVGTQFN.X	DECOY0_Solyc11g030740_31013
query:22694;rank:1	-0.963146	0.99809	1	X.DMEILAEIEKVKSSNNISDPESNRAIEGVLTDFFDT.X	DECOY1_Solyc08g067970_23782
query:20327;rank:1	-0.963146	0.99809	1	X.TKKYNAPIGVAVEDQLTYTRTEGTKDKT.X	DECOY1_Solyc06g072670_19160
query:12815;rank:1	-0.963146	0.99809	1	X.TPKQKVKLKTEVEKLLMN.X	DECOY1_Solyc02g087620_7818
query:16314;rank:1	-0.963255	0.99809	1	X.CVGHTCIALILTGGPQKAWMRRI.X	DECOY1_Solyc06g073410_19234
query:5658;rank:1	-0.963309	0.99809	1	X.KVYSVKKTAKVM.X	DECOY1_Solyc07g049720_21366
query:14153;rank:1	-0.963393	0.99809	1	X.SAVKDSKEVVIKSPVVTKAE.X	DECOY1_Solyc02g067080_6168
query:12839;rank:1	-0.963404	0.99809	1	X.TYCPVSIAKVAVKLESLLVP.X	DECOY0_Solyc01g091090_3351
query:21028;rank:1	-0.963444	0.99809	1	X.RYESRKGGMLRGEATLNSVIVVVAIAFLAN.X	DECOY1_Solyc08g006730_22516
query:11297;rank:1	-0.963499	0.99809	1	X.KVPGLPPTVSIIISYVVIS.X	DECOY1_Solyc05g006080_14730
query:8667;rank:1	-0.963531	0.99809	1	X.ITLLLSGSLTTNVALNN.X	DECOY0_Solyc10g079970_29283
query:6254;rank:1	-0.963543	0.99809	1	X.GYMILQAMIKSYL.X	DECOY0_Solyc04g082000_14521
query:19357;rank:1	-0.963595	1	1	X.LESPASRLPLRSILFAFPLWTLMSKT.X	DECOY1_Solyc09g091010_27060
query:7954;rank:1	-0.963595	1	1	X.KVKLVGFSVGSQKNI.X	DECOY0_Solyc02g065140_6075
query:4061;rank:1	-0.963595	1	1	X.HKSKNASQQTT.X	DECOY1_Solyc07g008010_20154
query:15471;rank:1	-0.963642	1	1	X.QKIAKKGDTLDLEEKLTSAKSG.X	DECOY0_Solyc10g024310_28037
query:18163;rank:1	-0.963669	1	1	X.QLMLSSKLLHLARVKIILATSTIP.X	DECOY0_Solyc09g008510_25057
query:14843;rank:1	-0.963669	1	1	X.KKRMPGPRKKEKKQMMKNS.X	DECOY1_Solyc04g025960_12866
query:11662;rank:1	-0.963669	1	1	X.TLGAVLQPSLAILALLVFV.X	DECOY0_Solyc12g043030_33705
query:6825;rank:1	-0.963669	1	1	X.GDLKPRAIKLSLIP.X	DECOY1_Solyc05g053350_16716
query:15122;rank:1	-0.96369	1	1	X.EPNQPPLLLLKVLLTSVSKIL.X	DECOY0_Solyc12g094660_34355
query:1128;rank:1	-0.96369	1	1	X.LGLTTGTLI.X	DECOY1_Solyc11g069340_31948
query:3366;rank:1	-0.963741	1	1	X.ARPMNGPIPANN.X	DECOY0_Solyc06g070940_18989
query:12317;rank:1	-0.963785	1	1	X.SDCADSPDSSTSTKASPT.X	DECOY1_Solyc04g077560_14082
query:10195;rank:1	-0.963785	1	1	X.SAGSSSVHASSPTHS.X	DECOY0_Solyc07g053960_21585
query:14026;rank:1	-0.963807	1	1	X.LPRQGISLWVLVFAPAALLN.X	DECOY0_Solyc06g071120_19007
query:11223;rank:1	-0.963807	1	1	X.TILEEIRKNKYHLAVF.X	DECOY1_Solyc01g108670_4802
query:10458;rank:1	-0.963807	1	1	X.SLSTPSSSMPHRVYT.X	DECOY1_Solyc09g009200_25120
query:14489;rank:1	-0.963881	1	1	X.RNIPGGGLHVYVRLIIGTGLH.X	DECOY0_Solyc11g044760_31295
query:14517;rank:1	-0.963939	1	1	X.EMTRKLETLPCNPLLSNSYT.X	DECOY1_Solyc08g080100_24478
query:11443;rank:1	-0.963939	1	1	X.ATKLKGADQAELATAAELAK.X	DECOY1_Solyc08g061610_23358
query:16763;rank:1	-0.963945	1	1	X.KTSISIIMMLSDNTYFETY.X	DECOY0_Solyc09g063060_26263
query:4274;rank:1	-0.963945	1	1	X.IYIIFVLTFSN.X	DECOY1_Solyc06g075600_19452
query:18450;rank:1	-0.963976	1	1	X.VKGGSLQHQKHIQNNQKGKGKLGRTG.X	DECOY0_Solyc01g028850_1959
query:1956;rank:1	-0.963976	1	1	X.RINSPRGPKG.X	DECOY0_Solyc01g103030_4241
query:16168;rank:1	-0.964038	1	1	X.LVAKVAGRSATTGALVRELKRNK.X	DECOY0_Solyc09g064610_26317
query:5537;rank:1	-0.964038	1	1	X.KKLLSSGRLMAKN.X	DECOY0_Solyc04g080780_14399
query:17536;rank:1	-0.964071	1	1	X.FSGGSVVFLTPLVLVNGSLISLIIW.X	DECOY1_Solyc01g102770_4216
query:14632;rank:1	-0.964083	1	1	X.TAPVTDDGRKALVEVSIKLMV.X	DECOY1_Solyc11g040390_31164
query:9041;rank:1	-0.964083	1	1	X.PLNPRALMISAERLP.X	DECOY0_Solyc08g075520_24031
query:5471;rank:1	-0.964083	1	1	X.AKGTPLIKAKAEM.X	DECOY1_Solyc05g014980_15514
query:9467;rank:1	-0.964137	1	1	X.PGAGSKISRSKKKNDKL.X	DECOY1_Solyc11g021070_30860
query:15645;rank:1	-0.964167	1	1	X.QKAKENSDSNVDYDGDRIGNDL.X	DECOY0_Solyc10g037930_28103
query:22138;rank:1	-0.964222	1	1	X.HLIIQTALNVLMGVPLRLPRPSSLKTLVPSAKTM.X	DECOY1_Solyc11g007000_30060
query:11213;rank:1	-0.964236	1	1	X.SNSSAKIHCMPFTNELV.X	DECOY0_Solyc08g069200_23901
query:17262;rank:1	-0.964335	1	1	X.KNVQAFLIDKAKLISGTTKAATST.X	DECOY1_Solyc02g078260_6888
query:2001;rank:1	-0.964335	1	1	X.LVLHTLAEN.X	DECOY1_Solyc01g107960_4732
query:18528;rank:1	-0.964357	1	1	X.IEVKDSTEESVEPASQMASTTQE.X	DECOY0_Solyc01g097120_3753
query:13288;rank:1	-0.964357	1	1	X.KLYNLFCTSRISSQDSA.X	DECOY0_Solyc12g008400_32487
query:1696;rank:1	-0.964434	1	1	X.MTETTMY.X	DECOY1_Solyc07g053670_21556
query:8559;rank:1	-0.964498	1	1	X.GGVSSLPQGIGVSGRRK.X	DECOY0_Solyc04g011580_12337
query:5534;rank:1	-0.964632	1	1	X.QKTVLKFKSRIN.X	DECOY0_Solyc06g071670_19061
query:3968;rank:1	-0.964632	1	1	X.KRVVLIVLIFT.X	DECOY1_Solyc07g006410_19994
query:15093;rank:1	-0.964636	1	1	X.VCVGARWRKQGYKVIKHGPPN.X	DECOY1_Solyc07g005650_19918
query:5192;rank:1	-0.964636	1	1	X.PLNIGSFLSKLR.X	DECOY0_Solyc12g009740_32621
query:13327;rank:1	-0.964636	1	1	X.QASAGMGIDTRGFMARMTV.X	DECOY0_Solyc07g045070_21203
query:11460;rank:1	-0.964636	1	1	X.RKSPLADVPQELLSITR.X	DECOY0_Solyc02g080400_7101
query:3332;rank:1	-0.964732	1	1	X.GIKVKEGSGSSSGG.X	DECOY0_Solyc07g005000_19853
query:19594;rank:1	-0.964774	1	1	X.RALIPVTTAMIPSLQGIVVERMLAKLPV.X	DECOY0_Solyc04g076750_14001
query:4104;rank:1	-0.964831	1	1	X.PLSTIRIRLY.X	DECOY0_Solyc07g021760_20619
query:17855;rank:1	-0.964834	1	1	X.PELKLISGATISQLKTWKQDGFEV.X	DECOY1_Solyc12g008510_32498
query:8784;rank:1	-0.964834	1	1	X.KKLAVLKDGALYLCTN.X	DECOY0_Solyc06g048420_17851
query:3403;rank:1	-0.964834	1	1	X.NAANAAPAAKAAVN.X	DECOY1_Solyc03g121620_11734
query:3052;rank:1	-0.964834	1	1	X.TITVIGIGASLT.X	DECOY0_Solyc07g042460_21045
query:1215;rank:1	-0.964834	1	1	X.SPPPITGSLGG.X	DECOY0_Solyc06g005670_17107
query:22619;rank:1	-0.964912	1	1	X.RTKSISEMERIGTRKFVKNRVRRYKSESDVD.X	DECOY0_Solyc04g076010_13927
query:22224;rank:1	-0.964912	1	1	X.LYIFSDKKCLREWLLFVLITLTLVTGFSLIIY.X	DECOY0_Solyc05g041480_16129
query:14311;rank:1	-0.964912	1	1	X.AIVKGFQSDARVRENATHIVS.X	DECOY1_Solyc08g080700_24538
query:11378;rank:1	-0.96493	1	1	X.LEGLHLELLMDVKTHIN.X	DECOY1_Solyc04g049650_13120
query:10782;rank:1	-0.96493	1	1	X.RAGIPFLILSSPNGSVF.X	DECOY1_Solyc04g077000_14026
query:9860;rank:1	-0.965029	1	1	X.TTSNSKPPNKARSRGHN.X	DECOY1_Solyc12g038320_33444
query:15838;rank:1	-0.96505	1	1	X.SSNKARVYQRSKPTRLRLHT.X	DECOY0_Solyc06g051060_18011
query:15141;rank:1	-0.96505	1	1	X.RNKSKKSKLLADQSKSLLI.X	DECOY0_Solyc04g081940_14515
query:10328;rank:1	-0.965128	1	1	X.KFHLVLVLSTGEAVVEA.X	DECOY1_Solyc05g047600_16344
query:1637;rank:1	-0.965128	1	1	X.SKFYVKYN.X	DECOY1_Solyc12g097060_34496
query:22086;rank:1	-0.965189	1	1	X.CIHVQATFVNDAVEAKGFKSMAFAGLVGINDKISSI.X	DECOY0_Solyc12g056600_33957
query:17541;rank:1	-0.965189	1	1	X.SGSIYGGVGTGTNSSSKTSMV.X	DECOY1_Solyc08g080960_24564
query:15405;rank:1	-0.965189	1	1	X.FAEQLLPSIRYDVLIVIPTKI.X	DECOY0_Solyc02g080180_7079
query:18414;rank:1	-0.96531	1	1	X.RNSFLSQGLRSNVKHMDVVRVIES.X	DECOY0_Solyc04g005550_11935
query:4217;rank:1	-0.96531	1	1	X.TLGAKLCIVDPN.X	DECOY0_Solyc06g048890_17897
query:17692;rank:1	-0.965326	1	1	X.TSTTYAVLVVPILPIFSLAGGARNSI.X	DECOY1_Solyc05g006020_14724
query:10825;rank:1	-0.965326	1	1	X.PGSLPLHDAQELEPVKK.X	DECOY0_Solyc01g108840_4819
query:16036;rank:1	-0.965327	1	1	X.LTVILLMKAWGIGLTVSWAALVM.X	DECOY0_Solyc12g019320_33071
query:13738;rank:1	-0.965327	1	1	X.LSTIFLKTLQEEQLREN.X	DECOY1_Solyc09g074120_26568
query:11594;rank:1	-0.965327	1	1	X.KSSAPHAHLQKEVTDLFC.X	DECOY0_Solyc10g085650_29749
query:9590;rank:1	-0.965327	1	1	X.VSTRYAVSAISSMKAFN.X	DECOY1_Solyc08g069070_23888
query:4603;rank:1	-0.965327	1	1	X.ITKESIVTIIS.X	DECOY0_Solyc01g107550_4691
query:15181;rank:1	-0.965406	1	1	X.SKGKNQDFELCLLREVLQVT.X	DECOY0_Solyc12g044350_33737
query:16836;rank:1	-0.965425	1	1	X.DPSNTTMQARQNGHPPSASVN.X	DECOY0_Solyc09g055690_25941
query:20009;rank:1	-0.965524	1	1	X.PGFYIGTNGLPYANPVIFGRELSKKQKGA.X	DECOY1_Solyc04g016380_12614
query:19258;rank:1	-0.965524	1	1	X.STLGLKATLLLATLGKLDALPRHGLTVN.X	DECOY1_Solyc05g053610_16742
query:15015;rank:1	-0.965524	1	1	X.LPKLALIGTLDRDLRQTMLGGT.X	DECOY0_Solyc11g042430_31169
query:20014;rank:1	-0.965596	1	1	X.ELSYLAILLLLALRVERRISTTLRSF.X	DECOY1_Solyc12g015650_32914
query:12295;rank:1	-0.965596	1	1	X.RSNSISARSSSEGNSH.X	DECOY1_Solyc02g077820_6844
query:6476;rank:1	-0.965691	1	1	X.TAIFSLSIAVQGLTA.X	DECOY1_Solyc06g009280_17368
query:9267;rank:1	-0.965722	1	1	X.FIVAALSPLLILIAYT.X	DECOY1_Solyc03g117000_11274
query:4878;rank:1	-0.965722	1	1	X.GGQIIPKSLLQR.X	DECOY0_Solyc07g008620_20215
query:15811;rank:1	-0.965741	1	1	X.RTAISGSEQTHDMLEPSSN.X	DECOY1_Solyc06g075320_19424
query:13794;rank:1	-0.965741	1	1	X.ALALAAKASGQMPIGANAGFSVT.X	DECOY0_Solyc08g078530_24325
query:2564;rank:1	-0.965741	1	1	X.QPQVPQLRGR.X	DECOY1_Solyc12g088720_34260
query:12107;rank:1	-0.965821	1	1	X.KIIYTIRNPKLMIIHN.X	DECOY0_Solyc05g012950_15315
query:10880;rank:1	-0.965879	1	1	X.GPSEGKIIVAGVKRDMRGG.X	DECOY1_Solyc01g006980_1086
query:13042;rank:1	-0.965882	1	1	X.VPVVCVEPVPPSPPIVTIPPN.X	DECOY1_Solyc00g018760_282
query:6249;rank:1	-0.965882	1	1	X.EKLSAVFLPPSMPN.X	DECOY1_Solyc10g012180_27832
query:7539;rank:1	-0.965977	1	1	X.LLQGDLGQVVQDLQQ.X	DECOY0_Solyc08g083260_24791
query:4268;rank:1	-0.966017	1	1	X.SQKWHSAPNN.X	DECOY0_Solyc09g075870_26743
query:2170;rank:1	-0.966017	1	1	X.LEMVHDPRV.X	DECOY0_Solyc01g081140_2957
query:17953;rank:1	-0.966073	1	1	X.RSSEVTLAIISRLTMPLHIPFIL.X	DECOY0_Solyc09g098240_27279
query:12630;rank:1	-0.966156	1	1	X.YTTMVGVIGELSETLPNLNG.X	DECOY0_Solyc11g013640_30621
query:4576;rank:1	-0.966156	1	1	X.MRSAIAALMHIN.X	DECOY0_Solyc06g068680_18863
query:95;rank:1	-0.966156	1	1	X.VNPPSPSN.X	DECOY1_Solyc04g006930_11974
query:16560;rank:1	-0.966263	1	1	X.RFILANMAEKLIIATNNSFYF.X	DECOY1_Solyc01g108410_4776
query:22273;rank:1	-0.966294	1	1	X.SGKKVSKRFSFLVIPSLFVVWISLIIAVILLARF.X	DECOY0_Solyc07g054500_21639
query:3564;rank:1	-0.966294	1	1	X.GTPKTSISIAVN.X	DECOY1_Solyc00g014970_246
query:1853;rank:1	-0.966294	1	1	X.KTLILTVSD.X	DECOY0_Solyc08g065380_23527
query:5795;rank:1	-0.966359	1	1	X.FSTDGGHFLLHAN.X	DECOY0_Solyc08g008190_22659
query:17579;rank:1	-0.966416	1	1	X.KSGVLSIVGNVSIFSFILLLLGTFN.X	DECOY1_Solyc11g050770_31394
query:16089;rank:1	-0.966454	1	1	X.VILYIPIAFGLHLFSKLHVFV.X	DECOY0_Solyc09g074790_26635
query:5868;rank:1	-0.966515	1	1	X.TKKLTLRYNAPLS.X	DECOY0_Solyc07g041550_20963
query:13209;rank:1	-0.966549	1	1	X.KSISGSTDSESSSLPVGE.X	DECOY0_Solyc12g017390_32985
query:7732;rank:1	-0.966549	1	1	X.LKKSAGLSHNWYT.X	DECOY0_Solyc02g089560_8011
query:17563;rank:1	-0.96657	1	1	X.GTLVALFLNIFFISITLGPAVGFMGT.X	DECOY0_Solyc11g063610_31577
query:9018;rank:1	-0.96657	1	1	X.HMYADNRNEVGGLSN.X	DECOY0_Solyc07g052610_21453
query:6620;rank:1	-0.96657	1	1	X.FKSRAIEFLKRAN.X	DECOY0_Solyc04g011660_12345
query:3501;rank:1	-0.966614	1	1	X.FGSMQSSTY.X	DECOY0_Solyc08g016050_22837
query:20734;rank:1	-0.966708	1	1	X.LPNALSACESFNTWESGTVGGQASGCYDSSL.X	DECOY1_Solyc09g047920_25866
query:18635;rank:1	-0.966713	1	1	X.MGIPKKEVPTAIVVPRLMELLSYTN.X	DECOY0_Solyc10g081550_29439
query:19885;rank:1	-0.96674	1	1	X.TGKDPSVPKYASDGKNKQTLSAGPKKKAAN.X	DECOY0_Solyc07g045340_21229
query:15871;rank:1	-0.966835	1	1	X.ATLNGRTGIVILLALLAWLLSN.X	DECOY0_Solyc04g014570_12437
query:5144;rank:1	-0.966835	1	1	X.PVCAYGLVFGHAW.X	DECOY0_Solyc12g006430_32389
query:4578;rank:1	-0.966835	1	1	X.KEDPVSAFTTW.X	DECOY0_Solyc11g011460_30403
query:4075;rank:1	-0.966835	1	1	X.SAESCMNEGGS.X	DECOY1_Solyc03g025820_9012
query:802;rank:1	-0.966835	1	1	X.NSGVTLVGS.X	DECOY0_Solyc10g006100_27425
query:22401;rank:1	-0.966846	1	1	X.MLRAEIVKIEEGVKIATAEDASRKAVKDLTKKTKD.X	DECOY0_Solyc12g017780_33019
query:15814;rank:1	-0.966911	1	1	X.KAETESMKEVPASTASALPE.X	DECOY1_Solyc04g074550_13880
query:15291;rank:1	-0.96693	1	1	X.GAHSYPFAASIILAQVQAQRNSS.X	DECOY0_Solyc03g096990_10483
query:13976;rank:1	-0.966984	1	1	X.TSVPTHQPVSSLRDEWINVS.X	DECOY1_Solyc10g045720_28274
query:9662;rank:1	-0.966984	1	1	X.LITGSRQLLNLTKSPN.X	DECOY1_Solyc03g112680_10842
query:5872;rank:1	-0.966984	1	1	X.ISVLAILIALAFFN.X	DECOY0_Solyc07g049170_21311
query:16002;rank:1	-0.96701	1	1	X.RKARILKQSNYVVGYKGDVIN.X	DECOY1_Solyc09g008620_25066
query:11332;rank:1	-0.96701	1	1	X.RIAIGRLGNMKTVFLLS.X	DECOY0_Solyc06g062970_18495
query:9825;rank:1	-0.96701	1	1	X.LFEVELDEVRRTSRT.X	DECOY1_Solyc01g060330_2384
query:3816;rank:1	-0.96701	1	1	X.KELKFKVKGPGG.X	DECOY1_Solyc11g007520_30112
query:16814;rank:1	-0.967026	1	1	X.KILSTSHLLATMKTRKLQGG.X	DECOY1_Solyc03g062720_9684
query:15538;rank:1	-0.967026	1	1	X.KVKSMSRGRGSSSQGMATPAS.X	DECOY1_Solyc03g114060_10980
query:5243;rank:1	-0.967026	1	1	X.IVGLSLAFVAPTGAN.X	DECOY0_Solyc01g020560_1929
query:16096;rank:1	-0.967109	1	1	X.ELRIGFSNSVTLWSLWLRGL.X	DECOY1_Solyc03g113340_10908
query:8726;rank:1	-0.967109	1	1	X.PEILIFKAPSAHPLVN.X	DECOY1_Solyc09g092350_27194
query:5044;rank:1	-0.967121	1	1	X.DIIHLDEGVQIR.X	DECOY0_Solyc10g049320_28427
query:970;rank:1	-0.967121	1	1	X.STTRVNT.X	DECOY1_Solyc02g086960_7752
query:22455;rank:1	-0.967123	1	1	X.GEIDSVDSRDEAAKDCAKLTIYEYDSKGIAMESA.X	DECOY0_Solyc02g070290_6489
query:20295;rank:1	-0.967123	1	1	X.ALTDPKQRKVTSSPAAVMYKMILIRRL.X	DECOY1_Solyc05g006100_14732
query:6936;rank:1	-0.967123	1	1	X.VLPVKLSTFSEYM.X	DECOY0_Solyc07g006440_19997
query:9560;rank:1	-0.967208	1	1	X.TYTKALVLYVGNYLK.X	DECOY0_Solyc07g066640_22341
query:9375;rank:1	-0.967208	1	1	X.AKDVVRKAQMIISHN.X	DECOY0_Solyc12g021230_33155
query:20803;rank:1	-0.967216	1	1	X.VLWKYSGFANITANELSGKNQGESVIGVKYM.X	DECOY1_Solyc08g077090_24182
query:20394;rank:1	-0.967261	1	1	X.MSDLDPRQASTESSSMGPVNSSSIIL.X	DECOY1_Solyc05g005780_14700
query:12274;rank:1	-0.967261	1	1	X.STGMRGASGIYKEKRHSPL.X	DECOY0_Solyc01g096680_3709
query:5195;rank:1	-0.967261	1	1	X.RIFGAESPDTLGY.X	DECOY1_Solyc11g021230_30876
query:9675;rank:1	-0.967307	1	1	X.GLEPANVVQPIHHIAIK.X	DECOY1_Solyc10g012200_27834
query:21607;rank:1	-0.967312	1	1	X.RVNILSAGLKNMPNCVDLDVKLRARIVVSTTGGG.X	DECOY0_Solyc11g065750_31689
query:22738;rank:1	-0.967399	1	1	X.ANALMEKDFVQRSKSELSEQKDESMWPFVTKGS.X	DECOY0_Solyc04g009450_12225
query:6701;rank:1	-0.967406	1	1	X.SSNIELILIQSIAAN.X	DECOY0_Solyc12g088170_34205
query:20621;rank:1	-0.967407	1	1	X.SNTAAMLTEKPLRRGYVHVIFPGFRLMLN.X	DECOY0_Solyc08g075480_24027
query:16938;rank:1	-0.967407	1	1	X.RLTVSMSLKLPLSRIFAKFVR.X	DECOY1_Solyc02g081530_7214
query:6762;rank:1	-0.967407	1	1	X.SGGVPKPLKSLCKALP.X	DECOY1_Solyc05g023710_15858
query:4553;rank:1	-0.967407	1	1	X.TTPAPPIGFLTKN.X	DECOY1_Solyc11g012250_30482
query:21598;rank:1	-0.967537	1	1	X.KTKTAAENIFKSRMSPGMAGKYSVKLRTVVTA.X	DECOY0_Solyc07g021130_20559
query:15795;rank:1	-0.967537	1	1	X.QSTGSYGSASLILSMTLIMASLF.X	DECOY1_Solyc02g091050_8158
query:2867;rank:1	-0.967537	1	1	X.QPSFVSLVLPQ.X	DECOY1_Solyc06g083710_19760
query:23238;rank:1	-0.967597	1	1	X.VSNSPHFVGTLVSTPKVANALTIRRGYSEARVLEDFIHVS.X	DECOY1_Solyc11g005080_29870
query:12464;rank:1	-0.967597	1	1	X.SPTLPRKMGNTRLETLW.X	DECOY0_Solyc07g005860_19939
query:10562;rank:1	-0.967597	1	1	X.KVLKIAHKAVKELKQAN.X	DECOY0_Solyc02g022870_5457
query:5509;rank:1	-0.967597	1	1	X.NKISVNRSSSSSN.X	DECOY1_Solyc09g089650_26924
query:5168;rank:1	-0.967597	1	1	X.DHQALNGIDQLAE.X	DECOY1_Solyc12g049540_33850
query:16416;rank:1	-0.967605	1	1	X.TDNLVKRSSGKSSKQLKKRKRN.X	DECOY1_Solyc02g068560_6316
query:20157;rank:1	-0.967675	1	1	X.KGLGQTGLEKEREEEEMIRRRGRFFV.X	DECOY1_Solyc08g062110_23408
query:17517;rank:1	-0.967675	1	1	X.VPLSSGSLPPPKDKSPPPTTGVSTQA.X	DECOY0_Solyc07g005480_19901
query:12356;rank:1	-0.967693	1	1	X.RRLPSESKLSRMITSLSC.X	DECOY1_Solyc01g014710_1650
query:6185;rank:1	-0.967704	1	1	X.KVVFFESEVLKM.X	DECOY0_Solyc05g054450_16825
query:906;rank:1	-0.967704	1	1	X.NQTNVAVAI.X	DECOY0_Solyc02g087810_7837
query:22467;rank:1	-0.967803	1	1	X.SLKSSPTAGPTASFSVLVDLPNILSSEKNSIGGVKSGSLSS.X	DECOY1_Solyc09g009120_25112
query:1326;rank:1	-0.967803	1	1	X.MQGWLKKN.X	DECOY0_Solyc02g072050_6665
query:11521;rank:1	-0.967813	1	1	X.VLAVILFVVLVVAFNVIT.X	DECOY1_Solyc12g062990_34088
query:19008;rank:1	-0.967979	1	1	X.KRGLSKARRLKLALIGGFGRHRELEE.X	DECOY0_Solyc08g041880_23105
query:13125;rank:1	-0.967979	1	1	X.DLTEFFGEKIMALITTILS.X	DECOY0_Solyc08g080430_24511
query:10820;rank:1	-0.967979	1	1	X.PLPVSIFIPSIKKSCPPN.X	DECOY1_Solyc02g089250_7980
query:7554;rank:1	-0.967979	1	1	X.VEEPVMLEERLGTG.X	DECOY0_Solyc05g055330_16913
query:10275;rank:1	-0.968001	1	1	X.TYGALLILRQVIKVDIA.X	DECOY0_Solyc06g005670_17107
query:17007;rank:1	-0.96809	1	1	X.QSMASEDSSSAIVEQASIQSSS.X	DECOY1_Solyc03g025440_8974
query:7199;rank:1	-0.9681	1	1	X.KLYDYSSAEESKQ.X	DECOY1_Solyc07g047780_21272
query:15083;rank:1	-0.968169	1	1	X.GTNLVKWKGKSNILETSTIRM.X	DECOY1_Solyc01g065520_2404
query:21104;rank:1	-0.968199	1	1	X.ASCDCHPDIALCASSARHHRMEVPGAISGMST.X	DECOY0_Solyc02g089500_8005
query:16112;rank:1	-0.968199	1	1	X.LVNSSIVSAYTSLSPNEDGGV.X	DECOY0_Solyc06g069700_18965
query:8768;rank:1	-0.968228	1	1	X.DLIVERFMARIRVGG.X	DECOY0_Solyc01g065920_2443
query:5959;rank:1	-0.968228	1	1	X.VVQKSIIISGHQSL.X	DECOY1_Solyc04g076800_14006
query:4774;rank:1	-0.968228	1	1	X.SDSSMCVSKFD.X	DECOY0_Solyc12g007230_32469
query:16121;rank:1	-0.968265	1	1	X.RIGVLQPVVTVIMVGGMDRRSLN.X	DECOY1_Solyc01g080500_2894
query:16051;rank:1	-0.968298	1	1	X.IEAATESKKSFKVMDQKLYK.X	DECOY1_Solyc08g081710_24638
query:2702;rank:1	-0.968298	1	1	X.LIIIGSIEILN.X	DECOY0_Solyc03g006100_8639
query:12594;rank:1	-0.96836	1	1	X.SKTAVLSQSSSASGSF.X	DECOY0_Solyc03g117950_11369
query:21308;rank:1	-0.968366	1	1	X.ALKRRIEMKQQNFKWNTKKRISGRESPH.X	DECOY1_Solyc01g088170_3158
query:16628;rank:1	-0.968366	1	1	X.FKWVSHLFIIVFLALFKRLSN.X	DECOY0_Solyc07g006900_20043
query:14047;rank:1	-0.968366	1	1	X.AIPVINASFFSCIVRMGRLA.X	DECOY1_Solyc04g018000_12676
query:12857;rank:1	-0.968366	1	1	X.KMKKLRYLVIGRTFLLH.X	DECOY0_Solyc08g005510_22397
query:17671;rank:1	-0.968397	1	1	X.KKIAIYTVARNISPSIKSIVHRKN.X	DECOY0_Solyc00g005420_19
query:10551;rank:1	-0.968397	1	1	X.KTNGWFEKLAYVHIVI.X	DECOY1_Solyc03g078440_9938
query:4194;rank:1	-0.968455	1	1	X.SSLRMSPFLRK.X	DECOY1_Solyc06g083050_19694
query:6200;rank:1	-0.968496	1	1	X.TSTHSLNQAYGLFV.X	DECOY1_Solyc02g062300_5892
query:8070;rank:1	-0.968504	1	1	X.ATVVISVPPGILGFVF.X	DECOY0_Solyc07g065060_22185
query:1690;rank:1	-0.968504	1	1	X.RYSKKAVIS.X	DECOY1_Solyc11g007340_30094
query:21797;rank:1	-0.96855	1	1	X.DKKLSAQALPCNSLHYQVDGEKVEFKSDQPD.X	DECOY1_Solyc03g114500_11024
query:7576;rank:1	-0.96855	1	1	X.QKIARVFEDIILPN.X	DECOY0_Solyc11g072420_32157
query:57;rank:1	-0.96855	1	1	X.IPKNIPK.X	DECOY1_Solyc01g067720_2618
query:10877;rank:1	-0.968595	1	1	X.ILMTLISVISAREALSPI.X	DECOY0_Solyc02g069190_6379
query:19632;rank:1	-0.968694	1	1	X.CAKMAPTVMHPVPVQLEAIRVSERVEN.X	DECOY1_Solyc09g083390_26896
query:4326;rank:1	-0.968694	1	1	X.DYSNFGAIGFFV.X	DECOY0_Solyc02g032530_5621
query:10036;rank:1	-0.968741	1	1	X.STTSSTPGPLEQT.X	DECOY1_Solyc04g071920_13716
query:8044;rank:1	-0.968741	1	1	X.SFMGETNVETQQVQ.X	DECOY1_Solyc01g068540_2698
query:14555;rank:1	-0.96878	1	1	X.AMTALRESKIERARFLGTIA.X	DECOY0_Solyc03g007040_8733
query:8284;rank:1	-0.968793	1	1	X.KRTNVDFIVKTAKI.X	DECOY1_Solyc11g021290_30882
query:16178;rank:1	-0.968836	1	1	X.KIAVGFVFFGPSLLLLQPSSRKN.X	DECOY0_Solyc09g064690_26325
query:4003;rank:1	-0.968836	1	1	X.EKGASLVVLMY.X	DECOY1_Solyc10g062010_28884
query:14823;rank:1	-0.968892	1	1	X.PLRGRKLKKVGKSGEKKVSAN.X	DECOY0_Solyc10g008320_27645
query:21326;rank:1	-0.968918	1	1	X.FDVESAFDENCLFKVKILEGSYKKVTSFLIV.X	DECOY0_Solyc10g082030_29487
query:11181;rank:1	-0.968918	1	1	X.SKIAPVPRKARSKARKP.X	DECOY0_Solyc08g007860_22629
query:20474;rank:1	-0.968932	1	1	X.RIDLDTDVKVKRGQLSVTLDDDHIIEEN.X	DECOY1_Solyc03g026120_9042
query:20262;rank:1	-0.968932	1	1	X.KKAGSMNSMNNTTGGFIFRIDILLSEAV.X	DECOY1_Solyc09g031850_25766
query:9600;rank:1	-0.968932	1	1	X.AAPRSKKLFSPIILPGG.X	DECOY1_Solyc02g090350_8088
query:21953;rank:1	-0.968991	1	1	X.MDYDGGYLTPKKIKSGSFRIVEVEMSALSVVN.X	DECOY1_Solyc05g006420_14764
query:12216;rank:1	-0.969027	1	1	X.ASALMLLRTASRIHTKAA.X	DECOY0_Solyc12g014450_32893
query:7842;rank:1	-0.969027	1	1	X.VKVNLVAIKIFTRGN.X	DECOY1_Solyc12g049600_33856
query:13823;rank:1	-0.969056	1	1	X.KREKHQARYILYADVIQP.X	DECOY0_Solyc03g123580_11831
query:4985;rank:1	-0.969056	1	1	X.AVLTVKTSIAQRN.X	DECOY0_Solyc11g045170_31335
query:2889;rank:1	-0.969056	1	1	X.IRSILSYTC.X	DECOY1_Solyc01g010730_1458
query:15987;rank:1	-0.969122	1	1	X.KVQEKMMFSLTLKLNGKLVPN.X	DECOY1_Solyc06g076800_19570
query:10547;rank:1	-0.969122	1	1	X.WEQLDMSAKLLQQISK.X	DECOY0_Solyc07g056250_21805
query:9988;rank:1	-0.96919	1	1	X.DALIKTAVIMHEPSKE.X	DECOY1_Solyc12g010530_32700
query:9684;rank:1	-0.96919	1	1	X.SNESSSSRAELRN.X	DECOY1_Solyc01g108100_4746
query:7699;rank:1	-0.969195	1	1	X.FGSTKSYASSLTSS.X	DECOY1_Solyc02g062280_5890
query:7297;rank:1	-0.969195	1	1	X.LLAAQVFPLISTLTF.X	DECOY1_Solyc04g074870_13912
query:5473;rank:1	-0.969195	1	1	X.SAVLWFGFIGILM.X	DECOY1_Solyc12g037980_33416
query:1054;rank:1	-0.969195	1	1	X.NLLHNSYP.X	DECOY0_Solyc03g121330_11705
query:18395;rank:1	-0.969218	1	1	X.NTDMLRHLSANWSSLSMDELN.X	DECOY1_Solyc12g005610_32308
query:19580;rank:1	-0.969289	1	1	X.WFTRYAFTYLGMASQRCKITSFV.X	DECOY0_Solyc12g056420_33939
query:16837;rank:1	-0.969289	1	1	X.SNAQAPSPLTYYAPFPHVTPRKS.X	DECOY1_Solyc10g050060_28500
query:13083;rank:1	-0.969289	1	1	X.WGHITRAKEKVAKVLRFD.X	DECOY1_Solyc01g010010_1388
query:5979;rank:1	-0.969289	1	1	X.DIDVARVTDVRAT.X	DECOY0_Solyc11g017000_30657
query:18113;rank:1	-0.969313	1	1	X.VAPGSLYPLAMTPSTNLPAAPQGFNIS.X	DECOY0_Solyc12g006990_32445
query:16945;rank:1	-0.969313	1	1	X.QLSSSIMTNSTNASSGAFFP.X	DECOY0_Solyc11g072600_32175
query:10123;rank:1	-0.969333	1	1	X.PGATSRRQHNPVFLGR.X	DECOY0_Solyc06g075270_19419
query:9067;rank:1	-0.969471	1	1	X.IISMSGSGSGRSSES.X	DECOY1_Solyc09g015830_25574
query:7665;rank:1	-0.969471	1	1	X.TGDKGKTVAAVKGVSKN.X	DECOY0_Solyc11g011960_30453
query:22942;rank:1	-0.969487	1	1	X.KVSMLPFKIVSPVIQATKNPVSALNLYSKAVGMVPDEN.X	DECOY0_Solyc11g071280_32043
query:20159;rank:1	-0.969487	1	1	X.NGIRSRMIRLFKLVLARNTKHALLCLN.X	DECOY0_Solyc03g096600_10445
query:12482;rank:1	-0.969503	1	1	X.LKKMKIHIAGTVKGKGCTS.X	DECOY0_Solyc05g052920_16673
query:13135;rank:1	-0.969586	1	1	X.SNTFGSNGSTDTSTSTAFG.X	DECOY1_Solyc10g044820_28190
query:4881;rank:1	-0.969599	1	1	X.GQSLGKDVYKSE.X	DECOY0_Solyc03g117550_11329
query:1651;rank:1	-0.969599	1	1	X.NDIMHVAIH.X	DECOY0_Solyc01g094960_3537
query:23717;rank:1	-0.969609	1	1	X.KATELIDEIKMEKKEMEAEKNKAQMERKRKALEKAAAKAAK.X	DECOY0_Solyc07g063100_21991
query:18828;rank:1	-0.969609	1	1	X.WKEEVVLGEKADSGFVIGYDINLAVAQ.X	DECOY1_Solyc04g081510_14472
query:16146;rank:1	-0.969609	1	1	X.HAGGFDGGLAVKGLRKFSITATVVL.X	DECOY0_Solyc07g063920_22073
query:8150;rank:1	-0.969609	1	1	X.ITIIMTVDFTTN.X	DECOY1_Solyc09g018170_25608
query:18564;rank:1	-0.969685	1	1	X.KSSHDVVIYRAPYPSHTTFSILSTN.X	DECOY0_Solyc04g082140_14535
query:11380;rank:1	-0.969694	1	1	X.QSGTVLVAKAIIIAKEGNV.X	DECOY1_Solyc10g052500_28640
query:8100;rank:1	-0.969747	1	1	X.KTPTALVPTQAPIAVL.X	DECOY0_Solyc03g098290_10613
query:6018;rank:1	-0.969747	1	1	X.DHVIQMVDRSIGF.X	DECOY0_Solyc11g061950_31511
query:18178;rank:1	-0.969784	1	1	X.AAAIKINRLMLKNPLANIAGYLLVNN.X	DECOY1_Solyc05g055180_16898
query:17123;rank:1	-0.969784	1	1	X.VSFLVIPLMFSKRKKKGKSKEV.X	DECOY1_Solyc04g009640_12244
query:13956;rank:1	-0.969784	1	1	X.VSEDKAPACKRGTSGGKRSR.X	DECOY0_Solyc01g102300_4169
query:469;rank:1	-0.969784	1	1	X.PQVIFTR.X	DECOY1_Solyc04g009580_12238
query:6522;rank:1	-0.969789	1	1	X.ESSGSERECSKG.X	DECOY1_Solyc11g013030_30560
query:19839;rank:1	-0.969885	1	1	X.KHSISGKFFNGISLVTGAYQAFGSDFALGG.X	DECOY0_Solyc00g007190_91
query:19075;rank:1	-0.969885	1	1	X.FLGVKGTGGFGGGVAGEGGFGGGTALAISFGIGG.X	DECOY1_Solyc04g074890_13914
query:21166;rank:1	-0.969885	1	1	X.HKLGAIVASASSSLVIAGNPSLCGASLYATFKITGN.X	DECOY0_Solyc10g086620_29845
query:12407;rank:1	-0.96998	1	1	X.TYAAFVMSAGPGLSSCVNGAS.X	DECOY0_Solyc09g011140_25313
query:3476;rank:1	-0.969982	1	1	X.LLLVSSSVQR.X	DECOY0_Solyc08g016220_22853
query:23307;rank:1	-0.970023	1	1	X.KNSSGSGATLDLPAAMIDEIQRREKLYHISLTVYPALPHD.X	DECOY0_Solyc07g052370_21429
query:11822;rank:1	-0.970023	1	1	X.GRASDVMLLEATVKYER.X	DECOY1_Solyc07g055060_21692
query:2500;rank:1	-0.970162	1	1	X.VKMPIGKSPI.X	DECOY0_Solyc07g055970_21777
query:20942;rank:1	-0.970162	1	1	X.TESLGMSAPAMEEAQRSTVEAICPVPIWNLL.X	DECOY1_Solyc02g090430_8096
query:14041;rank:1	-0.970162	1	1	X.AISVTASDGDSTELFTS.X	DECOY0_Solyc03g117430_11317
query:12923;rank:1	-0.970162	1	1	X.TGDTTTSLMDEGIIPEG.X	DECOY1_Solyc07g049360_21330
query:10039;rank:1	-0.970162	1	1	X.EAMKGRELILKSSGHN.X	DECOY0_Solyc11g020660_30821
query:21884;rank:1	-0.970171	1	1	X.KLSGITLMDSTKTVSNSAEMECGECSDVGSAI.X	DECOY0_Solyc08g065190_23509
query:10856;rank:1	-0.97018	1	1	X.GSAMQQGMSMITNMS.X	DECOY1_Solyc04g072900_13814
query:2192;rank:1	-0.97018	1	1	X.KGPTATPHMGT.X	DECOY1_Solyc08g008180_22658
query:3903;rank:1	-0.970266	1	1	X.GGFAVQSAAIVIY.X	DECOY1_Solyc10g049450_28440
query:15051;rank:1	-0.970279	1	1	X.SPQPPNIQPIIQPPFITVLK.X	DECOY1_Solyc01g104270_4364
query:14832;rank:1	-0.970279	1	1	X.SSSVMSSMALMTGLFVAN.X	DECOY1_Solyc03g034400_9270
query:20917;rank:1	-0.9703	1	1	X.WNRLFLFFENGKYRGKSISHLPALVANSW.X	DECOY1_Solyc07g053350_21526
query:16712;rank:1	-0.9703	1	1	X.LLTDVVAMVWKVVQRRLKMQP.X	DECOY0_Solyc03g059490_9659
query:15209;rank:1	-0.9703	1	1	X.LKLNLQLSLSLMLKALATPQN.X	DECOY0_Solyc04g052930_13331
query:14460;rank:1	-0.9703	1	1	X.QLKIGDGEWKMTKKEGKMV.X	DECOY0_Solyc09g092690_27223
query:12345;rank:1	-0.9703	1	1	X.ACPQLGGSDSGGSSSKLE.X	DECOY1_Solyc03g113000_10874
query:2499;rank:1	-0.9703	1	1	X.LPVDRGTTIN.X	DECOY1_Solyc08g065860_23574
query:1752;rank:1	-0.9703	1	1	X.LAMGRANPLN.X	DECOY1_Solyc03g112030_10778
query:5418;rank:1	-0.9703	1	1	X.KSSFVNDSDIQK.X	DECOY0_Solyc06g008450_17285
query:12740;rank:1	-0.970361	1	1	X.GFTRIVPLTKLGERTRN.X	DECOY0_Solyc08g006960_22539
query:7269;rank:1	-0.970361	1	1	X.TYRGIITKRTKSK.X	DECOY1_Solyc07g056400_21820
query:22999;rank:1	-0.970378	1	1	X.VVLKSSTLLMAKGFSQMLTVDGMAETGTEIWRVSVKAH.X	DECOY0_Solyc02g089260_7981
query:21831;rank:1	-0.970438	1	1	X.QPVGASLSSINDGLASPLFLNIFWYKLNFDLPQ.X	DECOY1_Solyc12g098570_34548
query:11646;rank:1	-0.970438	1	1	X.VDRKSEIFLPRIKSNVN.X	DECOY1_Solyc02g079020_6964
query:2699;rank:1	-0.970456	1	1	X.VLLRLFEGHN.X	DECOY1_Solyc03g006770_8706
query:2220;rank:1	-0.970478	1	1	X.KRGVTMVLSL.X	DECOY1_Solyc06g065870_18684
query:16366;rank:1	-0.970552	1	1	X.KQVLVIQKHQPISTVRLFVLSL.X	DECOY0_Solyc08g068120_23797
query:4082;rank:1	-0.970552	1	1	X.GSMSSEVSASN.X	DECOY1_Solyc03g059420_9652
query:3474;rank:1	-0.970552	1	1	X.MVIIAHVTSMK.X	DECOY1_Solyc01g098610_3902
query:3398;rank:1	-0.970552	1	1	X.LSKLALCHRVN.X	DECOY0_Solyc02g080340_7095
query:6728;rank:1	-0.970576	1	1	X.PRSPSEIFDLMAGR.X	DECOY0_Solyc06g008270_17267
query:20719;rank:1	-0.970576	1	1	X.ASLKVHDDGSKTSNVLTVLIAMPESQPSPMG.X	DECOY1_Solyc08g076910_24164
query:20640;rank:1	-0.970576	1	1	X.SSTAKNPRFHPMSVISISPTNWKIEQIVP.X	DECOY0_Solyc02g079440_7005
query:17325;rank:1	-0.970576	1	1	X.TGSTAPKRLDDLLKCLLSKIRRN.X	DECOY1_Solyc10g005930_27408
query:22323;rank:1	-0.970577	1	1	X.KVPKVRRGHLKAKKYVYGVRVRVKRGSRKATKN.X	DECOY0_Solyc09g057940_26059
query:20775;rank:1	-0.970577	1	1	X.ASKVPKVPMPESPSPATSKDSSATGKRLLNGP.X	DECOY0_Solyc01g009300_1317
query:10151;rank:1	-0.970577	1	1	X.VPWPTKKTGIVPTKKN.X	DECOY1_Solyc03g019670_8896
query:5169;rank:1	-0.970577	1	1	X.LPNPRSTPMPGRT.X	DECOY1_Solyc04g078000_14126
query:6764;rank:1	-0.970647	1	1	X.NTAEALPKGGPNRRN.X	DECOY1_Solyc08g007070_22550
query:2218;rank:1	-0.970647	1	1	X.LPLIVTVITA.X	DECOY0_Solyc06g011610_17499
query:5414;rank:1	-0.970676	1	1	X.VLKTLKGVVLTYL.X	DECOY1_Solyc05g010220_15142
query:22507;rank:1	-0.970714	1	1	X.GISNIDISSLTTGNTSFNSITISTTPYAATN.X	DECOY0_Solyc07g056310_21811
query:12466;rank:1	-0.970714	1	1	X.AGRVMVVKVESNGSSMSEVN.X	DECOY1_Solyc12g099650_34656
query:9628;rank:1	-0.970714	1	1	X.SFTITSSLGATTFFN.X	DECOY1_Solyc04g077360_14062
query:1264;rank:1	-0.970714	1	1	X.KGLSSGSVEQ.X	DECOY0_Solyc02g083020_7363
query:20825;rank:1	-0.970742	1	1	X.KKADFIVITDGPLLVLEKSDVNLTKAKYLL.X	DECOY1_Solyc01g102730_4212
query:3642;rank:1	-0.970742	1	1	X.GAMPTASPEAMT.X	DECOY1_Solyc03g005990_8628
query:3053;rank:1	-0.970742	1	1	X.MQTATVLFTLT.X	DECOY1_Solyc03g082750_10068
query:9076;rank:1	-0.970775	1	1	X.QPRFIVGGLTSGPGKAL.X	DECOY0_Solyc11g013700_30627
query:5242;rank:1	-0.970775	1	1	X.HQCGSAPRLPHLN.X	DECOY0_Solyc01g098740_3915
query:20769;rank:1	-0.970838	1	1	X.INLSIAYVGFAIIISEPADGNQENPTVKRYN.X	DECOY1_Solyc04g050860_13228
query:17645;rank:1	-0.970838	1	1	X.RSLPFEPDKLAWSDAGTEAFVLER.X	DECOY0_Solyc08g068020_23787
query:18750;rank:1	-0.970852	1	1	X.TSVLVTVVFLMDTRRALIGSMLSFT.X	DECOY1_Solyc04g076540_13980
query:11316;rank:1	-0.970852	1	1	X.KRQAIPLEVFTLDNKLV.X	DECOY0_Solyc07g014590_20313
query:15859;rank:1	-0.970874	1	1	X.NNRGFHQSIRKNTSTLKGLA.X	DECOY1_Solyc03g044690_9396
query:9349;rank:1	-0.970874	1	1	X.KIAITALWLVAIFELT.X	DECOY0_Solyc09g011560_25355
query:3127;rank:1	-0.970973	1	1	X.KDTDLLRMEN.X	DECOY1_Solyc08g065800_23568
query:21075;rank:1	-0.97099	1	1	X.KDEIMISSARKMKNLSIELRGAVSVLVGKFV.X	DECOY1_Solyc05g018900_15792
query:20889;rank:1	-0.97099	1	1	X.PRVKLRISLPSGRTGKELVSQALKFSLTDKGG.X	DECOY0_Solyc04g016530_12629
query:8681;rank:1	-0.97099	1	1	X.AFLLPIASSTAKLPVG.X	DECOY0_Solyc08g006010_22445
query:3118;rank:1	-0.97099	1	1	X.IFRGTRRAVSA.X	DECOY0_Solyc04g080460_14367
query:11321;rank:1	-0.971124	1	1	X.GSPTRIRLTNSPISRGL.X	DECOY1_Solyc03g082490_10042
query:2799;rank:1	-0.971129	1	1	X.TVRTIPLTLGG.X	DECOY0_Solyc12g099100_34601
query:21266;rank:1	-0.971171	1	1	X.MESRLRLLANFGVMSYAGAMLVTMVLAPSRMV.X	DECOY0_Solyc03g007360_8765
query:11152;rank:1	-0.971171	1	1	X.NSPSSSSKNYPTNQALN.X	DECOY1_Solyc01g005660_954
query:2135;rank:1	-0.971171	1	1	X.KVLPVVSGLN.X	DECOY0_Solyc02g089130_7969
query:4765;rank:1	-0.971219	1	1	X.SATSFTVMSN.X	DECOY0_Solyc10g050270_28521
query:13401;rank:1	-0.971267	1	1	X.LRRLVDSGVGVVPKYDSPIN.X	DECOY1_Solyc09g015910_25582
query:10391;rank:1	-0.97127	1	1	X.YLNKVLHKNRGVNKTN.X	DECOY0_Solyc02g089860_8041
query:1458;rank:1	-0.97127	1	1	X.SWTMGPLIN.X	DECOY0_Solyc05g051310_16513
query:18244;rank:1	-0.971314	1	1	X.MWIFSAVQVAPKGKQGAEGPLSWSGL.X	DECOY0_Solyc06g005950_17135
query:11813;rank:1	-0.971314	1	1	X.KQSPRVLCSINALLKKAY.X	DECOY0_Solyc09g097920_27247
query:1698;rank:1	-0.971314	1	1	X.ALMTVKMIN.X	DECOY1_Solyc03g078470_9940
query:13746;rank:1	-0.971369	1	1	X.AAWLAAGTGVIKLDTQVMYDV.X	DECOY1_Solyc01g006800_1068
query:13993;rank:1	-0.971405	1	1	X.GALMQKTALAIDHFSPLSKE.X	DECOY0_Solyc01g079230_2767
query:15779;rank:1	-0.971468	1	1	X.SIESMMSVMPTCLQNAKHN.X	DECOY0_Solyc01g060460_2397
query:19643;rank:1	-0.971505	1	1	X.PNIPPHSVPTPGIPGGAHTEFHIRANPPPN.X	DECOY1_Solyc01g008280_1216
query:16467;rank:1	-0.971543	1	1	X.MARKIYLLTPGLMIRKHLSIN.X	DECOY1_Solyc10g047680_28368
query:15622;rank:1	-0.971543	1	1	X.KKFVSKMLRLLRGKRSPGLR.X	DECOY1_Solyc03g121140_11686
query:4178;rank:1	-0.971543	1	1	X.KLLGFYRKTN.X	DECOY1_Solyc07g063350_22016
query:21034;rank:1	-0.971567	1	1	X.MEKEKSRSSIITTPSETGIGGESYMT.X	DECOY0_Solyc12g014010_32849
query:20249;rank:1	-0.971567	1	1	X.HPQAPSPYFLLIFPLCVFVTLGLHTSE.X	DECOY0_Solyc08g079810_24449
query:16006;rank:1	-0.9716	1	1	X.PMKLSSGNTRSGSTSSGGAGS.X	DECOY1_Solyc10g007430_27558
query:22803;rank:1	-0.971666	1	1	X.YTGPAIGLRQGMNSKMGWAALLLGAALLMLQFNNGSLI.X	DECOY0_Solyc07g043230_21121
query:13284;rank:1	-0.971666	1	1	X.QKVGGQPKDKIDSRVFIVSA.X	DECOY0_Solyc01g104640_4401
query:16700;rank:1	-0.971681	1	1	X.TRQESAQDAELFVHRALVVIIGG.X	DECOY0_Solyc06g069870_18981
query:11064;rank:1	-0.971681	1	1	X.VPKVGEAYVIVALDNAMR.X	DECOY1_Solyc03g118080_11382
query:3910;rank:1	-0.971681	1	1	X.TLRTRLKITN.X	DECOY0_Solyc09g055310_25903
query:15121;rank:1	-0.971695	1	1	X.LGMLIPVIIITKLCEDVRLQK.X	DECOY0_Solyc08g006660_22509
query:12378;rank:1	-0.971695	1	1	X.LLFYRLGSSLMNYGWFV.X	DECOY0_Solyc03g122010_11773
query:4196;rank:1	-0.971695	1	1	X.AMEAISSLCLKR.X	DECOY0_Solyc08g074890_23969
query:16287;rank:1	-0.971765	1	1	X.AFLERLLKFAQTGNRNITAYK.X	DECOY1_Solyc04g057940_13520
query:15208;rank:1	-0.971765	1	1	X.APTGSPMFGYLAVVAGVLGRTLVL.X	DECOY1_Solyc01g102530_4192
query:16300;rank:1	-0.971791	1	1	X.VLQQLPFMMALPQEIKVLIPIV.X	DECOY1_Solyc03g013240_8852
query:7036;rank:1	-0.971791	1	1	X.DQTSNPSLMSSN.X	DECOY0_Solyc07g007320_20085
query:15128;rank:1	-0.971819	1	1	X.GGPLNVPPPSPPTGSGPGPLGPGGVGP.X	DECOY1_Solyc05g018370_15740
query:13049;rank:1	-0.971819	1	1	X.MVIPLIITSSVPKVYDLVM.X	DECOY0_Solyc02g092730_8325
query:8616;rank:1	-0.971864	1	1	X.LLMWMLATLGIVIVH.X	DECOY0_Solyc08g041710_23089
query:8542;rank:1	-0.971864	1	1	X.EQAEDRVLLLKLGFV.X	DECOY0_Solyc09g091660_27125
query:7737;rank:1	-0.971864	1	1	X.HRFICVAILVGLASS.X	DECOY0_Solyc02g062580_5919
query:8523;rank:1	-0.971886	1	1	X.PNLTQKMRRISLKE.X	DECOY1_Solyc05g006950_14816
query:7773;rank:1	-0.971886	1	1	X.KLLPSALGPATLLKFV.X	DECOY1_Solyc06g084250_19814
query:15583;rank:1	-0.971957	1	1	X.VESKMIKELTVKLLLWNSVSGG.X	DECOY1_Solyc09g091370_27096
query:13506;rank:1	-0.971957	1	1	X.QLALSELEGHRKTYLIFP.X	DECOY0_Solyc07g017640_20415
query:12954;rank:1	-0.971957	1	1	X.GKAGAQQTMQASAEGSTFN.X	DECOY0_Solyc07g066050_22283
query:10524;rank:1	-0.971957	1	1	X.DLPGVVAFRKLENRWN.X	DECOY0_Solyc03g081240_10017
query:2103;rank:1	-0.971957	1	1	X.SPLKVSRLTT.X	DECOY1_Solyc12g040320_33540
query:15109;rank:1	-0.971964	1	1	X.HVAKKKLVLLLVMVFPFLEGL.X	DECOY0_Solyc07g014610_20315
query:15830;rank:1	-0.971981	1	1	X.VHIMVSRILLSADVSLWVEYM.X	DECOY1_Solyc01g006180_1006
query:8039;rank:1	-0.971981	1	1	X.QARMVEITLSLVTSQ.X	DECOY1_Solyc11g006640_30024
query:9656;rank:1	-0.972063	1	1	X.LNLTITMITQKQISTN.X	DECOY1_Solyc03g059340_9644
query:6043;rank:1	-0.972063	1	1	X.LNCGSQLQYSLTI.X	DECOY0_Solyc04g077710_14097
query:3991;rank:1	-0.972063	1	1	X.LQGIQVPSILR.X	DECOY0_Solyc11g007790_30139
query:23243;rank:1	-0.972077	1	1	X.GFNSPSEFCLMNTTSNQESRLLFSNTMHGGGYQGCG.X	DECOY0_Solyc09g014250_25425
query:7225;rank:1	-0.972077	1	1	X.NPGSILWWVLMMS.X	DECOY0_Solyc06g075370_19429
query:2984;rank:1	-0.972096	1	1	X.TRNSTDPFATN.X	DECOY0_Solyc12g014570_32905
query:8335;rank:1	-0.972162	1	1	X.TLVVEMSYRGSVLFV.X	DECOY1_Solyc02g076960_6758
query:18127;rank:1	-0.972172	1	1	X.PLNVLTDTLLTQILMVRKDGHSPR.X	DECOY0_Solyc12g044450_33747
query:23065;rank:1	-0.972234	1	1	X.QVIPPVGILITGWFLLFSVGGPSVWIIWLLGVTQFLGRIG.X	DECOY0_Solyc12g100360_34727
query:5630;rank:1	-0.972234	1	1	X.PSGVLNGLVTYVSS.X	DECOY0_Solyc11g069330_31947
query:4713;rank:1	-0.972234	1	1	X.LSLNLSLMKLNN.X	DECOY0_Solyc04g056640_13493
query:1006;rank:1	-0.972234	1	1	X.EYVLHVGE.X	DECOY1_Solyc06g065500_18648
query:12579;rank:1	-0.972261	1	1	X.ASSGLFFQGILTISANVLYT.X	DECOY1_Solyc10g005450_27360
query:11936;rank:1	-0.972261	1	1	X.RHLDSGFDVLRLNTADH.X	DECOY0_Solyc02g037510_5717
query:2617;rank:1	-0.972261	1	1	X.SPVPLCYDVL.X	DECOY1_Solyc03g120260_11598
query:21783;rank:1	-0.972267	1	1	X.SVGFPRLGDWVLVFLPRRAFAFVEVQDLHTGN.X	DECOY0_Solyc03g005280_8557
query:11768;rank:1	-0.972267	1	1	X.LMRTQGTTPTNILKLMN.X	DECOY1_Solyc09g011870_25386
query:10362;rank:1	-0.972267	1	1	X.EERSKREPLLHMLKN.X	DECOY0_Solyc12g019280_33067
query:473;rank:1	-0.972267	1	1	X.PKSNSATR.X	DECOY1_Solyc10g008790_27692
query:12735;rank:1	-0.972363	1	1	X.PSEYDHKSTHAIASLLLR.X	DECOY0_Solyc06g074000_19293
query:10261;rank:1	-0.972363	1	1	X.IVMSKGLKALVQDLAGM.X	DECOY1_Solyc01g094060_3448
query:19537;rank:1	-0.972372	1	1	X.TILLVVATSFGVWYISICISAYAYGSF.X	DECOY1_Solyc04g009380_12218
query:15696;rank:1	-0.972372	1	1	X.SLPIEKALKVTNFQGVRMSW.X	DECOY0_Solyc01g058140_2267
query:6700;rank:1	-0.972372	1	1	X.RMVMMTVVVIPYM.X	DECOY1_Solyc05g005720_14694
query:1127;rank:1	-0.972372	1	1	X.SLSISNHPN.X	DECOY1_Solyc04g074170_13842
query:11832;rank:1	-0.972458	1	1	X.QDKKRTKKTKKRSRFV.X	DECOY0_Solyc09g090740_27033
query:16515;rank:1	-0.972459	1	1	X.AHIGNSPSDKSCPKNSTGFMGN.X	DECOY0_Solyc01g106640_4601
query:8560;rank:1	-0.972459	1	1	X.RNASIGQVLVAEKRN.X	DECOY1_Solyc03g082690_10062
query:13298;rank:1	-0.97251	1	1	X.LEGAKDALSPFATAVSLYIK.X	DECOY0_Solyc08g075940_24073
query:7850;rank:1	-0.97251	1	1	X.KFLMAASLEYGVAGLS.X	DECOY0_Solyc09g090480_27007
query:6268;rank:1	-0.97251	1	1	X.MGRKKKPSNRGGES.X	DECOY0_Solyc07g064540_22133
query:11653;rank:1	-0.972553	1	1	X.YIQKHFTLNKLIKQQN.X	DECOY1_Solyc09g066480_26502
query:10429;rank:1	-0.972553	1	1	X.SLTMHMTPVVTYGN.X	DECOY0_Solyc07g025230_20661
query:19803;rank:1	-0.972648	1	1	X.ANVDGIRDLIREWMQALIDFSGRGIGLG.X	DECOY0_Solyc09g072660_26521
query:14064;rank:1	-0.972648	1	1	X.PKTNHCRFMVDVTIPDNFN.X	DECOY1_Solyc08g075020_23982
query:7273;rank:1	-0.972648	1	1	X.PTTSAMSDTGLSE.X	DECOY0_Solyc04g007420_12023
query:21130;rank:1	-0.972648	1	1	X.SKAIDDIRGSQHASKIAMTNSLLLADYLSAVSD.X	DECOY0_Solyc02g091430_8195
query:10437;rank:1	-0.972648	1	1	X.TAKGAMMEKGTTTLTDS.X	DECOY1_Solyc08g081400_24608
query:2231;rank:1	-0.972648	1	1	X.APLAVLPIAAW.X	DECOY0_Solyc01g096240_3665
query:15931;rank:1	-0.972657	1	1	X.LPVGPQRTDSPTSEHETTES.X	DECOY0_Solyc12g019480_33087
query:14806;rank:1	-0.972657	1	1	X.MATTMTASSVASRFMSTY.X	DECOY0_Solyc01g008250_1213
query:12650;rank:1	-0.972657	1	1	X.GIPVSSLNSLLLLARSVPN.X	DECOY0_Solyc06g066040_18701
query:11762;rank:1	-0.972744	1	1	X.RRKKKKLVSKDGRFSN.X	DECOY0_Solyc02g078590_6921
query:9500;rank:1	-0.972744	1	1	X.TYAAFVMGAGPGLSSCVNG.X	DECOY0_Solyc09g011140_25313
query:4317;rank:1	-0.972756	1	1	X.KRRKVISLYGN.X	DECOY1_Solyc01g007260_1114
query:8740;rank:1	-0.972786	1	1	X.ITRAIDNIVDLPTIN.X	DECOY0_Solyc01g014770_1655
query:6219;rank:1	-0.972786	1	1	X.TISTTPYAATN.X	DECOY0_Solyc07g056310_21811
query:9672;rank:1	-0.972839	1	1	X.RTLMATRSVVTVAAIFV.X	DECOY0_Solyc06g036720_17799
query:7619;rank:1	-0.972839	1	1	X.KAMKAQAALLVKRLT.X	DECOY1_Solyc07g040980_20912
query:9843;rank:1	-0.972855	1	1	X.SFSHGDDDDDTGTDK.X	DECOY1_Solyc10g086450_29828
query:5351;rank:1	-0.972924	1	1	X.TAKSQFSHNT.X	DECOY1_Solyc12g014260_32874
query:4518;rank:1	-0.972924	1	1	X.LLRTLNSIKTL.X	DECOY0_Solyc07g061900_21871
query:122;rank:1	-0.972924	1	1	X.DGRCIPGP.X	DECOY1_Solyc00g111270_638
query:12667;rank:1	-0.972934	1	1	X.SVETTLVLGRVTKLISSNN.X	DECOY0_Solyc08g014150_22755
query:15906;rank:1	-0.972954	1	1	X.LNLTLISGSSGNNGVLGAKVSAGQLN.X	DECOY0_Solyc00g139760_721
query:22318;rank:1	-0.97303	1	1	X.PLRGIQGGSLQKQRAIIARALIKDPKTALEISDLL.X	DECOY0_Solyc02g071350_6595
query:13278;rank:1	-0.97303	1	1	X.KFLLSDPLPITTKKYNDV.X	DECOY1_Solyc04g077500_14076
query:13098;rank:1	-0.973053	1	1	X.ALARISVGLIGALLIAAVLLE.X	DECOY0_Solyc03g112260_10801
query:4999;rank:1	-0.973053	1	1	X.FGTTSIYSPEVTT.X	DECOY1_Solyc07g042150_21016
query:22755;rank:1	-0.973063	1	1	X.GSKLYTMRDLNFADIAFNILRMHAITALEKDGVQI.X	DECOY0_Solyc06g076330_19525
query:23037;rank:1	-0.973351	1	1	X.IDIVAGLIRRRLSISNLPVKRSSVLRGNILMAGLSLDY.X	DECOY1_Solyc09g090850_27044
query:21856;rank:1	-0.973411	1	1	X.LSGMALTQNQIKNMPLRKSFSLCMGRFRNSE.X	DECOY1_Solyc05g018720_15774
query:4177;rank:1	-0.973411	1	1	X.KSQLPPLLPVAR.X	DECOY0_Solyc12g098980_34589
query:23719;rank:1	-0.973477	1	1	X.DSRASEAVLILAQISRQLSKKKIGMPWHARKYEIAKAKLSHP.X	DECOY0_Solyc09g082980_26855
query:2801;rank:1	-0.973477	1	1	X.KGPAAKIRTVS.X	DECOY1_Solyc07g017250_20378
query:16927;rank:1	-0.973506	1	1	X.KNLLDNSRQAAQPIFVSSSKLLL.X	DECOY1_Solyc10g006930_27508
query:9998;rank:1	-0.973506	1	1	X.AHATSIDTSGEVFSIVMP.X	DECOY0_Solyc05g013600_15379
query:7858;rank:1	-0.973506	1	1	X.IRCHPSGGFGQNDANT.X	DECOY0_Solyc08g060970_23299
query:21351;rank:1	-0.973549	1	1	X.TPKGAIGFILYSLLTKQGVPPKGVDLLIIRER.X	DECOY1_Solyc01g109930_4928
query:20816;rank:1	-0.973549	1	1	X.YAFICLILLVLIIMMLLPILLVIIFAIYR.X	DECOY1_Solyc08g076850_24158
query:16796;rank:1	-0.973601	1	1	X.KVLAKKHKREEHFEESCLHLG.X	DECOY1_Solyc05g013290_15348
query:10916;rank:1	-0.973601	1	1	X.GTLSKLANKKLKSRKN.X	DECOY0_Solyc01g090210_3263
query:6519;rank:1	-0.973615	1	1	X.DCVSTVKDVGDDPPQ.X	DECOY0_Solyc07g049490_21343
query:16054;rank:1	-0.973615	1	1	X.VKTSVLKVNGHSNPGHSAISRR.X	DECOY1_Solyc01g067600_2606
query:20564;rank:1	-0.973648	1	1	X.LEVLFVFVSVLSASPLTEPAVLRIIPFKSS.X	DECOY0_Solyc08g045880_23199
query:17105;rank:1	-0.973648	1	1	X.RKVPRLGPKVRRKNSAEERKGT.X	DECOY1_Solyc10g077140_29100
query:15187;rank:1	-0.973648	1	1	X.VGGGPIKMLKRRLPPKSEIPF.X	DECOY1_Solyc10g005870_27402
query:5705;rank:1	-0.973648	1	1	X.PSAVTMTTPQN.X	DECOY1_Solyc07g009130_20266
query:6127;rank:1	-0.973697	1	1	X.NVWLTIMITSSAD.X	DECOY1_Solyc02g077540_6816
query:19814;rank:1	-0.973747	1	1	X.YSSIFGELASSGSLEYSSGMPTSR.X	DECOY0_Solyc02g083940_7455
query:8866;rank:1	-0.973747	1	1	X.VVRKDPLLGTPAEADV.X	DECOY1_Solyc12g014080_32856
query:7502;rank:1	-0.973753	1	1	X.KEIVRKRTAFPLL.X	DECOY0_Solyc05g024000_15887
query:19112;rank:1	-0.973792	1	1	X.VTLFSLGIRSVRDSDVQAFIRSFAYS.X	DECOY1_Solyc01g090260_3268
query:18605;rank:1	-0.973792	1	1	X.DMIMLRSYICSILSIACQLVYLLKN.X	DECOY1_Solyc04g015950_12572
query:16953;rank:1	-0.973792	1	1	X.QPETIHAGHNCGKVMPLVFKRFV.X	DECOY0_Solyc01g108350_4771
query:15494;rank:1	-0.973792	1	1	X.QEPQQTSTAQGSRATMCHPASVE.X	DECOY0_Solyc06g073960_19289
query:8833;rank:1	-0.973792	1	1	X.SSRSSTSRSLQ.X	DECOY1_Solyc08g074980_23978
query:8240;rank:1	-0.973792	1	1	X.QPNMLPFKSSRIFF.X	DECOY0_Solyc05g021530_15839
query:3334;rank:1	-0.973792	1	1	X.RRIIAGLVGTN.X	DECOY1_Solyc03g096440_10432
query:20733;rank:1	-0.973887	1	1	X.TVNSQPSSNISSVVSSVKQDTPTHTA.X	DECOY0_Solyc06g033930_17629
query:22269;rank:1	-0.973891	1	1	X.TVPMEKFQGKVVLQKEVSSKGLDSNLHFSDFIFR.X	DECOY0_Solyc06g050630_17969
query:7477;rank:1	-0.973945	1	1	X.RGARTCGIKSYPFL.X	DECOY1_Solyc01g103690_4306
query:23114;rank:1	-0.973983	1	1	X.QPEVKQSPRVLCSINALLKKAYEFGLNLFPTLKKNRR.X	DECOY0_Solyc09g097920_27247
query:20645;rank:1	-0.97403	1	1	X.FSGGRRTKLGQGNAKIELRHTSTLNSQVF.X	DECOY0_Solyc10g086180_29801
query:5305;rank:1	-0.97403	1	1	X.GAHMRVQHMLQN.X	DECOY1_Solyc00g008160_140
query:6547;rank:1	-0.97403	1	1	X.MIGQIAAKENSTLAN.X	DECOY1_Solyc07g040940_20908
query:11561;rank:1	-0.974044	1	1	X.KSLNKKFISSKVLSSSP.X	DECOY0_Solyc07g064320_22113
query:7284;rank:1	-0.974044	1	1	X.KKHGTSVIFEKVT.X	DECOY0_Solyc06g036770_17801
query:18758;rank:1	-0.974078	1	1	X.QVTKMTGYSPNFDMNIAMSLSYT.X	DECOY0_Solyc01g107320_4669
query:9540;rank:1	-0.974143	1	1	X.PPAMIMTTIKHTGEH.X	DECOY0_Solyc03g122170_11789
query:23671;rank:1	-0.974168	1	1	X.PDEKVMGLVGEYSDLLRAAVPVVLVSVGLLILCMDYGQPKQRGG.X	DECOY1_Solyc11g069180_31932
query:22703;rank:1	-0.974168	1	1	X.TGRVYLRYSNQLTQHLDLNLLLKTSSSLLRGS.X	DECOY1_Solyc03g005630_8592
query:21261;rank:1	-0.974168	1	1	X.CHSLGVVKSAKLMIYISNHTLILDTSRGCRA.X	DECOY1_Solyc11g012570_30514
query:16642;rank:1	-0.974168	1	1	X.RNTTDLKKYLMKKYATFRGSAS.X	DECOY0_Solyc10g049930_28487
query:10043;rank:1	-0.974168	1	1	X.EVIVIVYLSIIFIVMD.X	DECOY1_Solyc05g045930_16276
query:20022;rank:1	-0.974173	1	1	X.TDKDLGTVAGTLTTKLFEDLTPLRLFTY.X	DECOY1_Solyc03g079920_9984
query:13638;rank:1	-0.974173	1	1	X.KNVAVYSIGNGTVGKYGCWGH.X	DECOY0_Solyc12g019130_33053
query:7439;rank:1	-0.974173	1	1	X.RVNCFARIPINPVF.X	DECOY0_Solyc10g080350_29321
query:3261;rank:1	-0.974242	1	1	X.SDDGPSSSSS.X	DECOY0_Solyc01g106280_4565
query:8832;rank:1	-0.974306	1	1	X.ALKVGVMSSLVFQEMV.X	DECOY0_Solyc04g076810_14007
query:7862;rank:1	-0.974341	1	1	X.IALCGSRTFLGRWN.X	DECOY0_Solyc01g079370_2781
query:7019;rank:1	-0.974341	1	1	X.AHKIKSAIVSRVF.X	DECOY0_Solyc01g101080_4147
query:3911;rank:1	-0.974341	1	1	X.PSGLGLRSLGQPN.X	DECOY1_Solyc01g066820_2530
query:7647;rank:1	-0.974364	1	1	X.QWTSTVLWQSSP.X	DECOY1_Solyc03g120260_11598
query:1254;rank:1	-0.974364	1	1	X.LTDYLLHN.X	DECOY0_Solyc04g080820_14403
query:3180;rank:1	-0.97444	1	1	X.LKEEDVDMVM.X	DECOY1_Solyc02g084210_7480
query:22210;rank:1	-0.974444	1	1	X.RSVLYHPGHSYTPLILVKKIMAELGLHRLMFV.X	DECOY0_Solyc01g094410_3483
query:19412;rank:1	-0.974444	1	1	X.KGTGKDDQPSDELAADSGSMINENSQQ.X	DECOY1_Solyc02g093880_8440
query:16525;rank:1	-0.974444	1	1	X.LLNTLFSVSNKQEGGLFLKSSAH.X	DECOY1_Solyc11g070020_32016
query:4013;rank:1	-0.974444	1	1	X.SGPLLKLVVFSF.X	DECOY0_Solyc09g090560_27015
query:21529;rank:1	-0.974459	1	1	X.FDRRSSTLTDSCAISPSGLTLNFMLGTT.X	DECOY0_Solyc02g014120_5283
query:19695;rank:1	-0.974459	1	1	X.RTEVIESDKGSPAATAIPKAPAAPPAAASIS.X	DECOY0_Solyc05g009530_15073
query:12759;rank:1	-0.974459	1	1	X.ESKISRVTAWDKRQGFTL.X	DECOY0_Solyc07g032100_20741
query:1063;rank:1	-0.974459	1	1	X.AGDGYSYNL.X	DECOY1_Solyc03g082430_10036
query:20895;rank:1	-0.974539	1	1	X.ARQKAINTFTGRDAVKIRLNKGRQLKKSEN.X	DECOY0_Solyc03g121810_11753
query:11694;rank:1	-0.974539	1	1	X.KQPVKGLFMAVALKSPKV.X	DECOY0_Solyc07g066600_22337
query:4310;rank:1	-0.974539	1	1	X.ILRFLKVTSSGI.X	DECOY1_Solyc10g079700_29256
query:1399;rank:1	-0.974539	1	1	X.GDNSVEPPN.X	DECOY0_Solyc10g079590_29245
query:9874;rank:1	-0.974554	1	1	X.PVWLPIIIGETLAGNIM.X	DECOY0_Solyc12g062810_34071
query:6541;rank:1	-0.974582	1	1	X.LGFLFTLASASLLSG.X	DECOY1_Solyc04g076620_13988
query:1634;rank:1	-0.974582	1	1	X.ISAAAALWVF.X	DECOY1_Solyc06g073270_19220
query:17984;rank:1	-0.974638	1	1	X.LIMSLPPDPIPGLGSMVKLVGIKKRD.X	DECOY0_Solyc03g005940_8623
query:15352;rank:1	-0.974638	1	1	X.LDLHVSMIELIVLTIILFQLP.X	DECOY0_Solyc05g052010_16583
query:1947;rank:1	-0.974638	1	1	X.PAKKTPSATT.X	DECOY0_Solyc05g009010_15021
query:16576;rank:1	-0.97465	1	1	X.KSATRIILCLNFCHACFVNLNL.X	DECOY0_Solyc05g046380_16321
query:17654;rank:1	-0.97472	1	1	X.VGNPSPFKLHEISRCPHTWFIGVI.X	DECOY1_Solyc06g009760_17416
query:18784;rank:1	-0.974737	1	1	X.TAQAAVTAALLLIEITSGGEPTSRLGGIAY.X	DECOY1_Solyc09g018070_25598
query:15077;rank:1	-0.974737	1	1	X.STQSSVMTAVALGASTSSPN.X	DECOY0_Solyc11g013760_30633
query:10638;rank:1	-0.974737	1	1	X.QPGPGYASGPALMSMTS.X	DECOY1_Solyc02g021560_5426
query:13948;rank:1	-0.974745	1	1	X.HRMRERSAASIFSQQSPT.X	DECOY0_Solyc02g032450_5613
query:6150;rank:1	-0.974745	1	1	X.DGLMNVPMDSNMI.X	DECOY0_Solyc03g033520_9183
query:11405;rank:1	-0.97484	1	1	X.LEVSPEGVFLKATVVVF.X	DECOY1_Solyc08g082410_24708
query:9112;rank:1	-0.97484	1	1	X.QLRTLSFRRKKSFI.X	DECOY1_Solyc10g085080_29692
query:1289;rank:1	-0.97484	1	1	X.KFPNPPPNS.X	DECOY0_Solyc11g071580_32073
query:18223;rank:1	-0.974936	1	1	X.IESDQGSQLVFYFTIVPKITLAQAS.X	DECOY0_Solyc02g068990_6359
query:12592;rank:1	-0.974936	1	1	X.STKSSASSLTSSFSS.X	DECOY1_Solyc02g062280_5890
query:8197;rank:1	-0.974936	1	1	X.ESQKSLGYHSMSN.X	DECOY0_Solyc01g094880_3529
query:6993;rank:1	-0.974936	1	1	X.TGGGPFKLIYATVTST.X	DECOY1_Solyc01g017320_1806
query:5562;rank:1	-0.974936	1	1	X.VLMSERKLFVF.X	DECOY1_Solyc04g072820_13806
query:1730;rank:1	-0.974936	1	1	X.PLIGKSGSALL.X	DECOY0_Solyc05g049930_16377
query:15162;rank:1	-0.974997	1	1	X.YGNRIHIRDPINLLKDEMAD.X	DECOY0_Solyc06g071810_19075
query:11560;rank:1	-0.974997	1	1	X.IMKTIRQSIALSMVLN.X	DECOY0_Solyc07g042460_21045
query:6398;rank:1	-0.974997	1	1	X.GHTAGTGTFSGSS.X	DECOY0_Solyc04g078720_14197
query:22758;rank:1	-0.975031	1	1	X.RSTHHGRKSRHEHNNKLQHMGRDIHNKKRLLGS.X	DECOY0_Solyc01g103090_4247
query:14866;rank:1	-0.975031	1	1	X.GRAGVYGMVMVLCVLFGVCFMGG.X	DECOY1_Solyc03g083980_10190
query:8494;rank:1	-0.975035	1	1	X.FCDSLGTFGKATQN.X	DECOY1_Solyc02g070540_6514
query:546;rank:1	-0.975126	1	1	X.SNGQHSKN.X	DECOY0_Solyc09g066170_26471
query:4546;rank:1	-0.975134	1	1	X.YSNSITVSMV.X	DECOY0_Solyc02g065660_6125
query:1170;rank:1	-0.975134	1	1	X.RVETERSV.X	DECOY0_Solyc02g094540_8505
query:10237;rank:1	-0.975135	1	1	X.GRSVVPVQLKTSRAKVAS.X	DECOY0_Solyc07g042790_21077
query:6645;rank:1	-0.975135	1	1	X.RRLVASYKMGRFV.X	DECOY0_Solyc05g012810_15301
query:2106;rank:1	-0.975135	1	1	X.VRTLDAAKNN.X	DECOY0_Solyc10g084210_29605
query:6693;rank:1	-0.975222	1	1	X.ASASSQSSFTIV.X	DECOY0_Solyc10g085810_29765
query:12968;rank:1	-0.975233	1	1	X.ISFLVRGGVPLYGIATLKR.X	DECOY0_Solyc03g005600_8589
query:9400;rank:1	-0.975233	1	1	X.GDGLVHGPSPKKPKIPT.X	DECOY0_Solyc11g071380_32053
query:21991;rank:1	-0.975273	1	1	X.LMALNSQAIRIGMGKEPLSMGINLVSSESTLIGFVGG.X	DECOY0_Solyc10g079710_29257
query:7565;rank:1	-0.975273	1	1	X.ENGPYLWAITESYI.X	DECOY1_Solyc08g059730_23274
query:15043;rank:1	-0.975273	1	1	X.GSKSVKGLTKKSRKDLSVGEAE.X	DECOY0_Solyc05g014130_15431
query:12822;rank:1	-0.975273	1	1	X.VTASPVVSAGSRSRGSRGKGRG.X	DECOY1_Solyc03g095580_10348
query:15308;rank:1	-0.975317	1	1	X.LPNPFILSVACNYTPLGKSARVG.X	DECOY1_Solyc10g008670_27680
query:11913;rank:1	-0.975332	1	1	X.AGNVCAQPVEVICSIFAEL.X	DECOY1_Solyc01g094600_3502
query:11792;rank:1	-0.975332	1	1	X.PDNQPFKSKLLLQIFKN.X	DECOY1_Solyc05g006180_14740
query:16955;rank:1	-0.975411	1	1	X.KAQRLQKSSDVNKKFEVIAKLN.X	DECOY0_Solyc05g009230_15043
query:11288;rank:1	-0.975411	1	1	X.STIPSESGEIPKDGVPVGVN.X	DECOY0_Solyc03g059470_9657
query:9931;rank:1	-0.975411	1	1	X.KCLDAWEPRVIASAIAN.X	DECOY0_Solyc06g008170_17257
query:9809;rank:1	-0.975411	1	1	X.THSSSQGIAQMPLTA.X	DECOY1_Solyc07g063570_22038
query:7558;rank:1	-0.975411	1	1	X.RNTALFVNLSLPET.X	DECOY0_Solyc05g007160_14837
query:4792;rank:1	-0.975411	1	1	X.ISWFRRKSNSC.X	DECOY1_Solyc09g007820_24988
query:3817;rank:1	-0.975411	1	1	X.KRSSVITVRQN.X	DECOY0_Solyc07g063780_22059
query:2526;rank:1	-0.975411	1	1	X.KCMCRGGRLM.X	DECOY0_Solyc09g097840_27239
query:16675;rank:1	-0.975412	1	1	X.SNLSLDHFKRILQTRKAFRKQ.X	DECOY0_Solyc09g091860_27145
query:14821;rank:1	-0.975431	1	1	X.SPVYKKLLGANVKFVRYVAQ.X	DECOY0_Solyc11g040340_31159
query:6797;rank:1	-0.975431	1	1	X.VFGRTPTKAIPIPSN.X	DECOY0_Solyc07g006820_20035
query:22948;rank:1	-0.975507	1	1	X.YTGKIIIPLSFSHIGGVMMAIFLHWDVILLKKSPYL.X	DECOY1_Solyc02g088300_7886
query:12449;rank:1	-0.97553	1	1	X.LTKWLESLKGLPKWLGGS.X	DECOY0_Solyc01g010340_1421
query:4919;rank:1	-0.97553	1	1	X.QRTSNSSMDN.X	DECOY0_Solyc12g010240_32671
query:1893;rank:1	-0.97553	1	1	X.TPKKEAVGDM.X	DECOY1_Solyc11g011310_30388
query:14773;rank:1	-0.975549	1	1	X.TTFPLTGTMKFVFQARMEHD.X	DECOY0_Solyc01g058530_2305
query:12394;rank:1	-0.975549	1	1	X.NEFPRRGGEILHPASNIP.X	DECOY1_Solyc09g014770_25476
query:8883;rank:1	-0.975549	1	1	X.GFPKVDHLVKKKKAS.X	DECOY1_Solyc04g050450_13196
query:18238;rank:1	-0.975603	1	1	X.QELEPPDSRKAAPSALVRVEILKVL.X	DECOY1_Solyc07g006830_20036
query:9695;rank:1	-0.975603	1	1	X.TTLTKSYLIGSEGLN.X	DECOY0_Solyc03g093990_10291
query:4716;rank:1	-0.975603	1	1	X.KLAKQLFALETN.X	DECOY0_Solyc01g094290_3471
query:11793;rank:1	-0.975629	1	1	X.ISEEVPLHRKSLKATAGN.X	DECOY0_Solyc08g016710_22897
query:20698;rank:1	-0.975687	1	1	X.GALMSSLGSVSICIFAPDVFQISEIIVLFSFS.X	DECOY1_Solyc01g097110_3752
query:18863;rank:1	-0.975687	1	1	X.QLGLPDIILLFSKFVFILCLAPKQQI.X	DECOY0_Solyc11g012260_30483
query:6376;rank:1	-0.975687	1	1	X.PRLYDMIAQVEVL.X	DECOY0_Solyc04g079280_14253
query:3500;rank:1	-0.975687	1	1	X.GSVHSSVPSS.X	DECOY1_Solyc02g082150_7276
query:1290;rank:1	-0.975687	1	1	X.YGGEKVGSSN.X	DECOY1_Solyc04g071770_13704
query:18988;rank:1	-0.975728	1	1	X.EKRMPPVETIGSKSVTTTMTKAGG.X	DECOY1_Solyc09g098490_27304
query:4011;rank:1	-0.975728	1	1	X.VRVMASNTGLRS.X	DECOY1_Solyc08g074280_23910
query:23761;rank:1	-0.975793	1	1	X.YTLTSYGAIPPISHTKSVLVDDVKSLTSRVDHSNLLLLP.X	DECOY0_Solyc02g014140_5285
query:18908;rank:1	-0.975793	1	1	X.SSLIFFAREKISQVTNPTLDPKDSI.X	DECOY0_Solyc01g103660_4303
query:15585;rank:1	-0.975793	1	1	X.TISLNLWPLQRANYTAVART.X	DECOY0_Solyc07g038120_20825
query:18149;rank:1	-0.975825	1	1	X.KRKKVSSGPAQKRVRKKMDSIAQN.X	DECOY1_Solyc01g016480_1724
query:17494;rank:1	-0.975825	1	1	X.KKLQKMYEAEALELKKHDYRT.X	DECOY0_Solyc08g074550_23935
query:11126;rank:1	-0.975825	1	1	X.MFIAAEIRTAKMIAAALN.X	DECOY1_Solyc12g057050_34002
query:8899;rank:1	-0.975825	1	1	X.RLAEFILISIVLVVV.X	DECOY1_Solyc02g031830_5552
query:1904;rank:1	-0.975825	1	1	X.LVVQKLVYD.X	DECOY1_Solyc04g056530_13482
query:12708;rank:1	-0.975827	1	1	X.IPPQTSPLESLIAALSPAKT.X	DECOY0_Solyc06g036580_17785
query:2803;rank:1	-0.975889	1	1	X.TYATGLILGDAI.X	DECOY1_Solyc01g087650_3106
query:20561;rank:1	-0.975926	1	1	X.QFIFVDIHFVADIPKEAHLSPDRLDDSTI.X	DECOY0_Solyc10g054440_28731
query:6675;rank:1	-0.975926	1	1	X.TSSSSKQRHS.X	DECOY0_Solyc07g041640_20969
query:22095;rank:1	-0.975964	1	1	X.PRATACIPMKTKNGLVTKEKVVKHERFFRKN.X	DECOY1_Solyc07g054940_21680
query:19725;rank:1	-0.975964	1	1	X.SASNLEMMKLNRSPDSCHEHLVQVGFV.X	DECOY1_Solyc04g077940_14120
query:15451;rank:1	-0.975964	1	1	X.KGVSGTMIGKLDSLFIRRQKGQ.X	DECOY1_Solyc03g098280_10612
query:14183;rank:1	-0.975964	1	1	X.LHNRDLTELSSPPLAAHNPN.X	DECOY0_Solyc00g123030_671
query:12996;rank:1	-0.975964	1	1	X.SLKKIASLSFKTGIMKFLN.X	DECOY1_Solyc02g043930_5754
query:3659;rank:1	-0.975964	1	1	X.FTNPPKLLGVN.X	DECOY1_Solyc10g005170_27332
query:9849;rank:1	-0.975984	1	1	X.SHARSLSLDSESSR.X	DECOY1_Solyc01g034150_1990
query:14938;rank:1	-0.976025	1	1	X.SILVIDLSGEFVQRLLFPYY.X	DECOY1_Solyc11g042440_31170
query:10277;rank:1	-0.976025	1	1	X.AAPIVVRMVVHPAKRKN.X	DECOY0_Solyc06g071810_19075
query:15894;rank:1	-0.976079	1	1	X.EIMVGRSKMGIKINSVRLPNKI.X	DECOY0_Solyc12g096450_34435
query:14203;rank:1	-0.976079	1	1	X.MAKMVHMTVGHEIVQHCVM.X	DECOY1_Solyc11g065660_31680
query:13721;rank:1	-0.976079	1	1	X.RIISVAVSIDIVVISVISVVH.X	DECOY0_Solyc07g021720_20615
query:12051;rank:1	-0.976102	1	1	X.QDVPKWAMRMLLILNVN.X	DECOY0_Solyc01g099060_3947
query:9880;rank:1	-0.976124	1	1	X.LTAGQMTSMGYRQSM.X	DECOY1_Solyc07g045420_21236
query:2948;rank:1	-0.976124	1	1	X.DRLPMPVNYT.X	DECOY1_Solyc11g043110_31232
query:12671;rank:1	-0.976175	1	1	X.RSGTNSEMSHIKISSGT.X	DECOY1_Solyc08g076190_24098
query:7544;rank:1	-0.976175	1	1	X.AWAQPSTPVRGLGLSN.X	DECOY0_Solyc04g082280_14549
query:6871;rank:1	-0.976175	1	1	X.SPRHLASSAMPAPVS.X	DECOY1_Solyc02g068720_6332
query:5036;rank:1	-0.976175	1	1	X.LTSSSTGSST.X	DECOY1_Solyc04g078550_14180
query:10695;rank:1	-0.976223	1	1	X.SELSNQDEGGGLTMTFF.X	DECOY1_Solyc02g068060_6266
query:18349;rank:1	-0.97624	1	1	X.LEVLLGMSNSNVELELRLRLIIIG.X	DECOY0_Solyc03g006100_8639
query:11710;rank:1	-0.97624	1	1	X.EERRIRITGSTKVNER.X	DECOY1_Solyc05g013790_15398
query:10161;rank:1	-0.97624	1	1	X.RSGDLINTILNTKTHL.X	DECOY1_Solyc07g005850_19938
query:3974;rank:1	-0.97624	1	1	X.ESSVQTDAEP.X	DECOY0_Solyc02g070690_6529
query:3408;rank:1	-0.97624	1	1	X.SSLAVMPPLT.X	DECOY0_Solyc09g007870_24993
query:22457;rank:1	-0.976323	1	1	X.QQNANDQLALAMVSGTIVFGSLDSKYCGNPLSGVCGC.X	DECOY0_Solyc04g050570_13205
query:21394;rank:1	-0.976323	1	1	X.LSLRTEIQPKSDEFVVEIQRFNMISARNAKA.X	DECOY1_Solyc01g106090_4546
query:12938;rank:1	-0.976323	1	1	X.QPGPPGMLLALHGNPPPSPT.X	DECOY0_Solyc12g042330_33639
query:4218;rank:1	-0.976323	1	1	X.VKGLDVGVLETN.X	DECOY0_Solyc06g048950_17903
query:23028;rank:1	-0.976365	1	1	X.MVRETHEPRITELTNEYSMTEDYCEVNLGAIHITY.X	DECOY1_Solyc02g076860_6748
query:16653;rank:1	-0.976365	1	1	X.ASSSVGSSASTSSISREVKN.X	DECOY1_Solyc09g014790_25478
query:15009;rank:1	-0.976365	1	1	X.ILISNKQVKMTGFISFFIQS.X	DECOY0_Solyc04g016550_12631
query:8576;rank:1	-0.976365	1	1	X.RVALVIDIKPTKLRN.X	DECOY0_Solyc06g082360_19627
query:16774;rank:1	-0.976378	1	1	X.CMVGDFLSLRAGLKRVFWGLFV.X	DECOY0_Solyc09g055830_25953
query:16673;rank:1	-0.976378	1	1	X.GKCRIIGVDEEAQSVGSQKLALRE.X	DECOY1_Solyc07g018340_20482
query:7785;rank:1	-0.976378	1	1	X.QKQSIKCTYFYT.X	DECOY1_Solyc05g014960_15512
query:7265;rank:1	-0.976378	1	1	X.YTTSRIDKIELNV.X	DECOY1_Solyc12g056230_33920
query:21500;rank:1	-0.976422	1	1	X.RSHRMLQVQTIILMKMKSYDRAVANFGEAL.X	DECOY1_Solyc01g095710_3612
query:13941;rank:1	-0.976422	1	1	X.VKRRSAVFKLIMSSRGLAVGG.X	DECOY0_Solyc07g066430_22321
query:16761;rank:1	-0.97646	1	1	X.GLSSNSTFTFGDLNSSTSPN.X	DECOY0_Solyc04g079100_14235
query:18114;rank:1	-0.976516	1	1	X.SMHGNRLCLNFGSLLAVLSHIFVW.X	DECOY1_Solyc05g006360_14758
query:17454;rank:1	-0.976516	1	1	X.HLIGIALIAEHSQHRRGPVAKEVS.X	DECOY0_Solyc07g008900_20243
query:7926;rank:1	-0.976516	1	1	X.LELTTKAEDLMACVE.X	DECOY1_Solyc04g077760_14102
query:7077;rank:1	-0.976516	1	1	X.SGLSGTDTGGEIKKLR.X	DECOY0_Solyc02g070750_6535
query:16003;rank:1	-0.976521	1	1	X.LIVCKTKVVLPIWKPPPPEYT.X	DECOY0_Solyc02g068730_6333
query:19917;rank:1	-0.976556	1	1	X.KENETKTRGLPKKQEEMVLLKGSTI.X	DECOY0_Solyc06g068020_18797
query:10004;rank:1	-0.976556	1	1	X.DLFAKILNVTALCNAQQ.X	DECOY1_Solyc06g074230_19316
query:3498;rank:1	-0.97662	1	1	X.MSALFSSSN.X	DECOY0_Solyc06g005450_17085
query:2441;rank:1	-0.97662	1	1	X.VLATPVAVYPK.X	DECOY1_Solyc11g069320_31946
query:5019;rank:1	-0.976651	1	1	X.KKSKQPNRNLL.X	DECOY0_Solyc03g121330_11705
query:19901;rank:1	-0.976654	1	1	X.TEEMTMGSAMATAALFWSTMVSTRN.X	DECOY0_Solyc10g084590_29643
query:13499;rank:1	-0.976654	1	1	X.EPPHSVSKVASASSIQCLFQ.X	DECOY0_Solyc01g057520_2207
query:13248;rank:1	-0.976654	1	1	X.LSLKTPWVPTILMGSSPTGAN.X	DECOY1_Solyc02g085390_7596
query:8926;rank:1	-0.976654	1	1	X.AFNLLLDPKLKLHPF.X	DECOY0_Solyc10g051020_28593
query:13497;rank:1	-0.976719	1	1	X.GKEEILITARKRQLAAAAASP.X	DECOY0_Solyc06g007360_17177
query:18029;rank:1	-0.976746	1	1	X.DLQSVGSATESGSSTESSKGTSH.X	DECOY0_Solyc06g043030_17819
query:11217;rank:1	-0.976746	1	1	X.PSVSQKGLTTPPLILSKGA.X	DECOY1_Solyc02g079020_6964
query:8849;rank:1	-0.976746	1	1	X.CLVRESKGCITVRTL.X	DECOY0_Solyc12g035930_33313
query:8482;rank:1	-0.976746	1	1	X.HISSFPTPSTGNQN.X	DECOY0_Solyc02g068970_6357
query:22713;rank:1	-0.976792	1	1	X.QENSSSSADGLKKLATNQIMPKIKENNDSGIIGVSG.X	DECOY1_Solyc05g008780_14998
query:16243;rank:1	-0.976792	1	1	X.RVISVLRFSDLVTMNIKLW.X	DECOY1_Solyc11g010860_30344
query:10797;rank:1	-0.976792	1	1	X.FEKLTQGMTIRTRMQ.X	DECOY0_Solyc02g082140_7275
query:4657;rank:1	-0.976792	1	1	X.IKSIGSPALAVSIN.X	DECOY0_Solyc00g011890_203
query:2995;rank:1	-0.976792	1	1	X.EATLDAQLFCL.X	DECOY0_Solyc09g065550_26409
query:11952;rank:1	-0.976818	1	1	X.LLGVKSSEMRVHSPIALN.X	DECOY0_Solyc09g008610_25065
query:10240;rank:1	-0.976818	1	1	X.AYSDESSMIVMNSN.X	DECOY0_Solyc02g068630_6323
query:20118;rank:1	-0.976842	1	1	X.AADSVPMGSDRDLNSRDSSLRWPSTV.X	DECOY1_Solyc03g119920_11564
query:19327;rank:1	-0.976842	1	1	X.GFMTGVLITAVNRGPEAQFAVLPLLMLW.X	DECOY0_Solyc06g073420_19235
query:18642;rank:1	-0.976842	1	1	X.RIFNNALVSVRSMGSGTDIFAALLLA.X	DECOY1_Solyc11g069100_31924
query:9095;rank:1	-0.976842	1	1	X.SIGSKVIHAVGVKAAARGG.X	DECOY1_Solyc03g095970_10386
query:12732;rank:1	-0.976917	1	1	X.TGSGNVLATGGPVASGAGSRKN.X	DECOY0_Solyc01g068580_2701
query:11639;rank:1	-0.976917	1	1	X.GAKGCWAVAPVKGNIDRSVS.X	DECOY0_Solyc08g075820_24061
query:7197;rank:1	-0.976917	1	1	X.ASPHCTCSGSYCGN.X	DECOY0_Solyc04g015300_12509
query:6735;rank:1	-0.976931	1	1	X.SAKLPSFPPFLPPN.X	DECOY0_Solyc04g005050_11885
query:11020;rank:1	-0.976931	1	1	X.SLLQEINHHGTTLLSTGG.X	DECOY0_Solyc07g054120_21601
query:2336;rank:1	-0.976931	1	1	X.KVTFISTPSGT.X	DECOY1_Solyc10g085540_29738
query:17098;rank:1	-0.976937	1	1	X.APMVPGKPFALTIGMRPIAVPHHGGG.X	DECOY1_Solyc03g119660_11538
query:15860;rank:1	-0.976937	1	1	X.AVEGPSMIAFVTRLLYPTLHGGG.X	DECOY1_Solyc04g071880_13712
query:15389;rank:1	-0.976937	1	1	X.LLEPKGPEDDVVNMSSSVLNWP.X	DECOY0_Solyc03g115810_11155
query:10624;rank:1	-0.977016	1	1	X.KLPYDLKFGYSHVNIK.X	DECOY1_Solyc04g079850_14306
query:10494;rank:1	-0.977016	1	1	X.QVKLIIPFALLVSEVIQ.X	DECOY1_Solyc01g073660_2710
query:19361;rank:1	-0.977016	1	1	X.HIRASKQIMIFEQDLMLKNKIELAAN.X	DECOY0_Solyc11g032100_31049
query:10791;rank:1	-0.977016	1	1	X.YTTNGVTHEAGAGMIKCS.X	DECOY1_Solyc07g055210_21706
query:18771;rank:1	-0.977032	1	1	X.HPEGFPSKNILCCNKRSSQDLMELL.X	DECOY1_Solyc12g057130_34010
query:16519;rank:1	-0.977032	1	1	X.KVDSPHRMVRTGSSSTGHDD.X	DECOY1_Solyc06g019190_17556
query:10158;rank:1	-0.977032	1	1	X.SHSMGLDCGKSSVASVKS.X	DECOY1_Solyc01g081430_2986
query:22772;rank:1	-0.977069	1	1	X.RKRRYALGPGVSQSCSSADTNSSGCLLSAVGEGSKTNLGDN.X	DECOY0_Solyc11g010950_30353
query:17407;rank:1	-0.977069	1	1	X.QQAETIANAIADLAAPDYEKLQVLT.X	DECOY0_Solyc03g117630_11337
query:2162;rank:1	-0.977069	1	1	X.KNLLSFVSTT.X	DECOY0_Solyc01g108270_4763
query:12643;rank:1	-0.977115	1	1	X.LPNALSAMESFNTWESG.X	DECOY1_Solyc09g047920_25866
query:16696;rank:1	-0.977207	1	1	X.KETVVNKGKEPHVSLTIELLQF.X	DECOY0_Solyc06g066600_18755
query:5485;rank:1	-0.977207	1	1	X.ARSRRISRYPN.X	DECOY1_Solyc05g018350_15738
query:3559;rank:1	-0.977207	1	1	X.LERKNGSFAVF.X	DECOY0_Solyc10g085710_29755
query:434;rank:1	-0.977207	1	1	X.CTDPNPPN.X	DECOY0_Solyc00g090660_575
query:21281;rank:1	-0.977223	1	1	X.KVKVGGVDGEEGQTYPVWKRMKNTPRDVAET.X	DECOY1_Solyc09g047880_25862
query:20324;rank:1	-0.977223	1	1	X.TIGVTEENHISMNSLSYKDLSTTVADIPAT.X	DECOY0_Solyc08g005850_22429
query:17965;rank:1	-0.977223	1	1	X.QISQQMAQLDGPLQLHVRVGVTRPV.X	DECOY1_Solyc07g053610_21550
query:7415;rank:1	-0.977223	1	1	X.KLGKKEKKILMVPN.X	DECOY1_Solyc07g005890_19942
query:6145;rank:1	-0.977223	1	1	X.TYRIVISALGQTLP.X	DECOY0_Solyc10g054220_28709
query:4823;rank:1	-0.977223	1	1	X.SELMLRANGSIGG.X	DECOY0_Solyc03g122030_11775
query:1750;rank:1	-0.977313	1	1	X.LDSTSGIVKG.X	DECOY0_Solyc06g035490_17683
query:1129;rank:1	-0.977313	1	1	X.SGGISGLLHK.X	DECOY0_Solyc03g053110_9525
query:12075;rank:1	-0.977345	1	1	X.LLYSLFSAIGIFTSSTT.X	DECOY1_Solyc03g025820_9012
query:11546;rank:1	-0.977345	1	1	X.MKEKQEAPEEDVMITES.X	DECOY0_Solyc03g033820_9213
query:17306;rank:1	-0.977412	1	1	X.GKWRKQLRTMKKRLIPDPTKGG.X	DECOY1_Solyc05g007150_14836
query:16815;rank:1	-0.977412	1	1	X.QTPHGLVFTAVGATAYTLSSV.X	DECOY1_Solyc03g059260_9636
query:16622;rank:1	-0.977412	1	1	X.SVVYAFLKSGTATVDQTLSLWLV.X	DECOY0_Solyc05g052920_16673
query:14299;rank:1	-0.977412	1	1	X.SNIFMTNTMTGLQGTSP.X	DECOY1_Solyc01g108340_4770
query:11997;rank:1	-0.977412	1	1	X.EALFGLIHYIKLTYKQN.X	DECOY0_Solyc03g033620_9193
query:23183;rank:1	-0.977414	1	1	X.ELVTLDDELPFLDAMHAIILRENKVKLVRILYQDGSR.X	DECOY0_Solyc05g015950_15609
query:9087;rank:1	-0.977414	1	1	X.KMPIPSIILKDRAES.X	DECOY0_Solyc07g052940_21485
query:1093;rank:1	-0.977414	1	1	X.GMISILVLV.X	DECOY1_Solyc10g017950_27906
query:19328;rank:1	-0.977483	1	1	X.LGGVVSSFTKKLTVIHKTCFIILLPW.X	DECOY1_Solyc12g033070_33238
query:17793;rank:1	-0.977483	1	1	X.TKMLLGASIATTMIVVASRYDPNI.X	DECOY0_Solyc03g033840_9215
query:14556;rank:1	-0.977483	1	1	X.PSVAFGLGEEFAIALGRKKML.X	DECOY1_Solyc07g056540_21834
query:11796;rank:1	-0.977483	1	1	X.FNKKHKTKYNHNFPLN.X	DECOY0_Solyc01g113620_4095
query:11202;rank:1	-0.977509	1	1	X.LMISILKVLKRAIQESN.X	DECOY1_Solyc03g093850_10278
query:10488;rank:1	-0.977509	1	1	X.RGKTLATVAGAMILNISN.X	DECOY0_Solyc03g083770_10169
query:3950;rank:1	-0.977509	1	1	X.AVIPAMVESSEA.X	DECOY0_Solyc03g097370_10521
query:20354;rank:1	-0.977511	1	1	X.VAESGTPATVRGGIKLAGSIALKGACKLANVVY.X	DECOY0_Solyc05g014560_15473
query:9671;rank:1	-0.977511	1	1	X.GAHRLRRIKSPKICSI.X	DECOY1_Solyc02g094150_8466
query:12;rank:1	-0.977604	1	1	X.AHTSGRGN.X	DECOY0_Solyc09g083400_26897
query:22837;rank:1	-0.977604	1	1	X.RGITSPMATLTVNSLLHSHQNNVFLVAPGSTIQPTQLF.X	DECOY1_Solyc01g080560_2900
query:2165;rank:1	-0.977604	1	1	X.PAGPAPSSKLKG.X	DECOY0_Solyc02g092790_8331
query:15391;rank:1	-0.97761	1	1	X.QMLLRVPTTFILLIFPLTLT.X	DECOY1_Solyc08g005880_22432
query:22293;rank:1	-0.97761	1	1	X.KMTGPMTPLHINNSMDPKDSVGKFQQLQQFNIN.X	DECOY1_Solyc04g080270_14348
query:20892;rank:1	-0.97761	1	1	X.AGKTKVIVWMKTEVISASKSKGLVAYLTKK.X	DECOY1_Solyc10g085300_29714
query:4168;rank:1	-0.97761	1	1	X.APDFFRGKPWP.X	DECOY0_Solyc12g055960_33893
query:11505;rank:1	-0.977621	1	1	X.LLVVVVVAVEVVFVIVVVN.X	DECOY1_Solyc10g050020_28496
query:9583;rank:1	-0.977621	1	1	X.KAIVWEVAGRKFMSN.X	DECOY1_Solyc06g067970_18792
query:3030;rank:1	-0.977621	1	1	X.HAYLAGVGIIPN.X	DECOY1_Solyc10g083760_29560
query:2255;rank:1	-0.977621	1	1	X.ISGRRPVTY.X	DECOY1_Solyc11g071610_32076
query:639;rank:1	-0.977621	1	1	X.NKKSYPF.X	DECOY1_Solyc06g071330_19028
query:16082;rank:1	-0.977699	1	1	X.LNPQSPTLQWKKSIRREVVF.X	DECOY0_Solyc06g074360_19329
query:15377;rank:1	-0.977699	1	1	X.TPYKSDSPEEPMHVISSETPP.X	DECOY1_Solyc11g072810_32196
query:12899;rank:1	-0.977699	1	1	X.LSGSKFGMNGPGAKTSMLAPAP.X	DECOY0_Solyc02g083420_7403
query:529;rank:1	-0.97771	1	1	X.AKMAMGDN.X	DECOY0_Solyc03g093250_10219
query:17271;rank:1	-0.977759	1	1	X.ISINHSITKKQHRLTSLVVKNGL.X	DECOY0_Solyc08g075620_24041
query:14772;rank:1	-0.977759	1	1	X.ITHVVTASNARRSPNFTFV.X	DECOY0_Solyc06g024290_17567
query:11188;rank:1	-0.977759	1	1	X.NNPGSSSKVSKAAPHGN.X	DECOY0_Solyc02g080500_7111
query:6147;rank:1	-0.977759	1	1	X.CVPPIVGINKHIKN.X	DECOY1_Solyc05g014800_15496
query:19234;rank:1	-0.977795	1	1	X.TGEFLIDPEYTPDYDTQELFASSPPE.X	DECOY0_Solyc05g050840_16467
query:6455;rank:1	-0.977795	1	1	X.LIPLKGELLIKYGN.X	DECOY1_Solyc07g021190_20564
query:18613;rank:1	-0.97789	1	1	X.FVKIALMKDYTLNKVLFLLGGYYT.X	DECOY1_Solyc02g071340_6594
query:23155;rank:1	-0.97789	1	1	X.DYHTAAGKHEPELARVFIVIRLICDFDSLNVKVDRRG.X	DECOY0_Solyc02g092470_8299
query:14680;rank:1	-0.97789	1	1	X.IHAVLLLNSSFLLFFTHSAH.X	DECOY1_Solyc03g119280_11500
query:12141;rank:1	-0.977897	1	1	X.SGQITKQLAGPTAPAKKLP.X	DECOY0_Solyc07g065040_22183
query:8422;rank:1	-0.977897	1	1	X.RDRALKEGICMERE.X	DECOY1_Solyc03g043730_9304
query:10187;rank:1	-0.977908	1	1	X.LALGKVYNTIQSILTY.X	DECOY0_Solyc10g044630_28173
query:7710;rank:1	-0.977908	1	1	X.LVNAARHVVFHRSSA.X	DECOY0_Solyc02g080340_7095
query:12825;rank:1	-0.977985	1	1	X.QQMLVQLKRVVIVPLEGY.X	DECOY1_Solyc08g006830_22526
query:11357;rank:1	-0.977985	1	1	X.DRASKGIEQAVLMQLSLL.X	DECOY0_Solyc04g007320_12013
query:8797;rank:1	-0.978036	1	1	X.IARIKSTDIKMFPSQ.X	DECOY1_Solyc01g080850_2928
query:8414;rank:1	-0.978036	1	1	X.FSIPRSGLPRINLGN.X	DECOY0_Solyc05g013280_15347
query:4981;rank:1	-0.978036	1	1	X.IIGSLCLLRWLN.X	DECOY0_Solyc04g017950_12671
query:4959;rank:1	-0.978036	1	1	X.DILFKSIIGSVK.X	DECOY0_Solyc08g068610_23845
query:3188;rank:1	-0.978036	1	1	X.VNLTKNVFLN.X	DECOY0_Solyc08g079550_24423
query:968;rank:1	-0.978036	1	1	X.VHDNIIIN.X	DECOY1_Solyc06g082130_19604
query:10263;rank:1	-0.978081	1	1	X.PLCESPHFILVKLSRM.X	DECOY1_Solyc05g010160_15136
query:5717;rank:1	-0.978081	1	1	X.NNRVANLMKKES.X	DECOY1_Solyc08g006590_22502
query:2613;rank:1	-0.978081	1	1	X.PKGAGPNVRSSN.X	DECOY0_Solyc09g089660_26925
query:11664;rank:1	-0.978106	1	1	X.IIIVSGAVKIPLLPPSSLSN.X	DECOY0_Solyc05g012200_15241
query:3828;rank:1	-0.978106	1	1	X.KTAVILLPGLIA.X	DECOY1_Solyc02g071680_6628
query:21618;rank:1	-0.978174	1	1	X.VVGSALSRPIKMNRQNCSDIMMNCNAAREIS.X	DECOY0_Solyc07g005240_19877
query:7479;rank:1	-0.978174	1	1	X.LNVCMANEHLKTIF.X	DECOY1_Solyc08g077700_24242
query:80;rank:1	-0.978174	1	1	X.IPKLINL.X	DECOY0_Solyc04g074020_13827
query:18287;rank:1	-0.978176	1	1	X.PLSLKKHKATTTPSPSSTLPMISKIS.X	DECOY1_Solyc07g054290_21618
query:3946;rank:1	-0.978176	1	1	X.LNINMIDCFSN.X	DECOY1_Solyc04g079010_14226
query:1300;rank:1	-0.978176	1	1	X.GDVIPGLVNN.X	DECOY1_Solyc03g111860_10768
query:11562;rank:1	-0.978205	1	1	X.AATAFTGPVVINQSVRDAL.X	DECOY0_Solyc05g015490_15563
query:3253;rank:1	-0.978205	1	1	X.TAKKPLKKIH.X	DECOY0_Solyc01g059760_2329
query:21999;rank:1	-0.978271	1	1	X.VNLDVFAVTKCILPLEFGQKRLILQIRRNPAVM.X	DECOY0_Solyc03g122110_11783
query:4634;rank:1	-0.978271	1	1	X.TGGEVVKVEKQGG.X	DECOY1_Solyc12g044900_33790
query:5102;rank:1	-0.978312	1	1	X.QVLDVVLEYHLS.X	DECOY0_Solyc02g030100_5483
query:18120;rank:1	-0.978367	1	1	X.QLKKRKVDIRRSAKSRKIRIHN.X	DECOY0_Solyc01g090470_3289
query:9409;rank:1	-0.978367	1	1	X.QNVLLCTGVMLGGKES.X	DECOY1_Solyc02g068660_6326
query:14164;rank:1	-0.978403	1	1	X.SSSGEVTLGASKFSSRIDPRL.X	DECOY1_Solyc03g025260_8956
query:16543;rank:1	-0.97845	1	1	X.LKPNTNTSPSSSTSTTPPN.X	DECOY0_Solyc12g088930_34281
query:16541;rank:1	-0.97845	1	1	X.LLEKSVPQKVKVRRRSLKLVN.X	DECOY1_Solyc06g063420_18540
query:15747;rank:1	-0.97845	1	1	X.SETVTEANHVKAFERVESTGLS.X	DECOY1_Solyc01g100120_4052
query:15412;rank:1	-0.97845	1	1	X.QSSRKTSRVRQSPRIPLL.X	DECOY0_Solyc04g011970_12375
query:7486;rank:1	-0.97845	1	1	X.LLGSFVTLGLTASGFS.X	DECOY1_Solyc02g065420_6102
query:2752;rank:1	-0.97845	1	1	X.PALNDAEVKVF.X	DECOY0_Solyc02g070470_6507
query:19233;rank:1	-0.978502	1	1	X.TEWQSGRVPPGSPDPGREEPSLDQLF.X	DECOY1_Solyc04g082290_14550
query:8683;rank:1	-0.978502	1	1	X.LSEDVIVSAKIKLSGW.X	DECOY0_Solyc07g007920_20145
query:6489;rank:1	-0.978502	1	1	X.SPGNNSLVSEKSN.X	DECOY0_Solyc02g093310_8383
query:5087;rank:1	-0.978502	1	1	X.KRTIATNGGIVDVA.X	DECOY1_Solyc05g005160_14638
query:4616;rank:1	-0.978502	1	1	X.IHGGIGTNGTTSGGG.X	DECOY1_Solyc06g068350_18830
query:16501;rank:1	-0.978557	1	1	X.AGSSPLFPIAAIQKTPVLKNISR.X	DECOY0_Solyc12g088770_34265
query:11533;rank:1	-0.978557	1	1	X.DEPSNSSESFESSK.X	DECOY1_Solyc01g079100_2754
query:10206;rank:1	-0.978557	1	1	X.GDTNVEPFIAEVPSPKV.X	DECOY0_Solyc04g005270_11907
query:7289;rank:1	-0.978557	1	1	X.KLEPLMVEMIARST.X	DECOY0_Solyc06g068860_18881
query:20663;rank:1	-0.978588	1	1	X.RAIIVVRLQQITSQSKFFSPLNLPSNLES.X	DECOY1_Solyc10g033560_28066
query:21124;rank:1	-0.978588	1	1	X.IDLLSRVTLESGLGVMVTLVSQKKVQSGKLLN.X	DECOY0_Solyc01g104880_4425
query:15130;rank:1	-0.978588	1	1	X.LPNTYVAFGAFDTIKMIKVAT.X	DECOY0_Solyc02g071070_6567
query:5386;rank:1	-0.978588	1	1	X.GPAVVHHKLVDVSS.X	DECOY1_Solyc07g064810_22160
query:982;rank:1	-0.978588	1	1	X.KERLDGII.X	DECOY0_Solyc03g058310_9545
query:17168;rank:1	-0.978601	1	1	X.IPNVRSVKTPSRKLSPEVDVIR.X	DECOY0_Solyc01g081640_3007
query:10226;rank:1	-0.978601	1	1	X.ISLLTKRGYEIAPLLGG.X	DECOY0_Solyc05g018510_15753
query:5712;rank:1	-0.978601	1	1	X.NLLPDDDYDDTST.X	DECOY1_Solyc11g031970_31036
query:4389;rank:1	-0.978652	1	1	X.KIKHSLPVAPHN.X	DECOY0_Solyc11g039660_31097
query:3920;rank:1	-0.978652	1	1	X.IKPKTTEKHTN.X	DECOY0_Solyc02g031680_5537
query:3576;rank:1	-0.978652	1	1	X.LSHSRKRSIPS.X	DECOY0_Solyc09g030390_25721
query:3463;rank:1	-0.978652	1	1	X.QPNITKFKLGN.X	DECOY0_Solyc12g014310_32879
query:11753;rank:1	-0.9787	1	1	X.FLSSHATLIARLGDSIFV.X	DECOY1_Solyc04g080610_14382
query:15613;rank:1	-0.978726	1	1	X.IKRLDLNYGNVSLMFAGKVES.X	DECOY1_Solyc02g093060_8358
query:13485;rank:1	-0.978726	1	1	X.SRARVYKVVKDALAKEIFV.X	DECOY0_Solyc05g050800_16463
query:5656;rank:1	-0.978748	1	1	X.KVVMMFFMDISN.X	DECOY0_Solyc07g026690_20701
query:1502;rank:1	-0.978748	1	1	X.KTVASFTNGT.X	DECOY0_Solyc11g021180_30871
query:21860;rank:1	-0.978799	1	1	X.KPVNLGLTLSAMNARARAWPRQKLYNTSLGEQA.X	DECOY1_Solyc09g042290_25810
query:15281;rank:1	-0.978799	1	1	X.ARSIRAKFIFLWRRYGQVF.X	DECOY1_Solyc12g015800_32928
query:10146;rank:1	-0.978799	1	1	X.GYLMVPGLILFPILTM.X	DECOY1_Solyc02g088900_7946
query:681;rank:1	-0.978799	1	1	X.LPVMMDW.X	DECOY0_Solyc10g005460_27361
query:5852;rank:1	-0.978843	1	1	X.GTPPKGSKTLLSR.X	DECOY0_Solyc11g069710_31985
query:2800;rank:1	-0.978843	1	1	X.TFLLVTTVNSL.X	DECOY1_Solyc07g045440_21238
query:13666;rank:1	-0.978864	1	1	X.QLSTLFTMTLSFIIT.X	DECOY1_Solyc05g041590_16140
query:12200;rank:1	-0.978864	1	1	X.SIVLVILDIQSAGLSTDDM.X	DECOY1_Solyc07g064170_22098
query:8464;rank:1	-0.978864	1	1	X.GELPPDPYIKMVGPVN.X	DECOY0_Solyc12g099320_34623
query:5392;rank:1	-0.978864	1	1	X.LITIIGLKLIFSN.X	DECOY0_Solyc06g011610_17499
query:3297;rank:1	-0.978864	1	1	X.SRSSQTKSRIP.X	DECOY1_Solyc08g081060_24574
query:4212;rank:1	-0.978898	1	1	X.FSLGSATWTN.X	DECOY0_Solyc12g042780_33681
query:22439;rank:1	-0.978938	1	1	X.AMDNQNLGNEPVSSNPLVTLRKNGIDVLSGAKIKVM.X	DECOY0_Solyc04g080260_14347
query:18639;rank:1	-0.978938	1	1	X.KILEICGIVGMPLAQCAIILGEGVRWI.X	DECOY0_Solyc01g080450_2889
query:8714;rank:1	-0.978938	1	1	X.LISGVIGLFAAHPKEN.X	DECOY1_Solyc01g104910_4428
query:5372;rank:1	-0.978938	1	1	X.FSSSPSNSSSH.X	DECOY0_Solyc03g005500_8579
query:19915;rank:1	-0.978997	1	1	X.FICADGAYCSLGHRSRDDFPNTARTPLN.X	DECOY1_Solyc06g074810_19374
query:5376;rank:1	-0.978997	1	1	X.GMGSHEQVTGSN.X	DECOY0_Solyc11g007230_30083
query:20495;rank:1	-0.979003	1	1	X.LLGIGISSASAGLILLRAMQAEKNVILILPDM.X	DECOY1_Solyc08g075450_24024
query:19668;rank:1	-0.979003	1	1	X.IGATKGATHPGAHRTKQSITLSMPLQDVL.X	DECOY0_Solyc01g005490_937
query:11143;rank:1	-0.979003	1	1	X.SQDNMSCDVSSNMNFN.X	DECOY0_Solyc08g076940_24167
query:10583;rank:1	-0.979096	1	1	X.HSKSELLQYKRKRFV.X	DECOY0_Solyc08g013740_22715
query:5472;rank:1	-0.979129	1	1	X.GTVTCAAFLVLIVF.X	DECOY1_Solyc10g078680_29154
query:4540;rank:1	-0.979129	1	1	X.KSIVSKVVRLLI.X	DECOY0_Solyc05g009830_15103
query:3171;rank:1	-0.979129	1	1	X.RGGPSKGARAMA.X	DECOY0_Solyc12g041980_33605
query:15103;rank:1	-0.979141	1	1	X.AGTGPKHQSRQATVLELVTAYS.X	DECOY1_Solyc01g103480_4286
query:6243;rank:1	-0.979141	1	1	X.PSSVKVKGSKIVGSGGG.X	DECOY0_Solyc07g018130_20463
query:5334;rank:1	-0.979141	1	1	X.QKGVSAGILIILF.X	DECOY1_Solyc03g117540_11328
query:15816;rank:1	-0.979141	1	1	X.ELRTKTKTFLKTSDVSDCLM.X	DECOY1_Solyc05g052870_16668
query:18027;rank:1	-0.979196	1	1	X.LLLSQQTQLSPALGVVVLYLLQRFV.X	DECOY0_Solyc04g079040_14229
query:16336;rank:1	-0.979196	1	1	X.LPSARASSSSPMSPSPSSNSN.X	DECOY1_Solyc08g066600_23646
query:10075;rank:1	-0.979279	1	1	X.QPMGGTLFRNSLSGVF.X	DECOY1_Solyc06g042960_17812
query:5375;rank:1	-0.979279	1	1	X.ESMVTSRSIN.X	DECOY1_Solyc06g071030_18998
query:5037;rank:1	-0.979279	1	1	X.ESTTSSNSSST.X	DECOY1_Solyc11g065440_31660
query:2913;rank:1	-0.979279	1	1	X.TEIIIIEGKSN.X	DECOY0_Solyc07g063960_22077
query:20717;rank:1	-0.979295	1	1	X.AITLAAGSLASMLMSITMITSVSGSLGN.X	DECOY1_Solyc03g080000_9992
query:12578;rank:1	-0.979295	1	1	X.KRIKLLLTLAMFSVLLF.X	DECOY0_Solyc09g089520_26911
query:11695;rank:1	-0.97932	1	1	X.EHASDGSSSSSSSDSD.X	DECOY0_Solyc12g014170_32865
query:933;rank:1	-0.97932	1	1	X.NLVHVTHN.X	DECOY1_Solyc02g064800_6042
query:15032;rank:1	-0.979394	1	1	X.IENTTVDRLLKLSFSESASN.X	DECOY1_Solyc05g014390_15456
query:13441;rank:1	-0.979394	1	1	X.SLVKLPYISRNLLKNAYVP.X	DECOY0_Solyc02g082900_7351
query:10079;rank:1	-0.979394	1	1	X.FVGITSMDTESQLDFT.X	DECOY1_Solyc11g007280_30088
query:18980;rank:1	-0.979415	1	1	X.EQVKFEENRERSIRGGYLGLTLLN.X	DECOY0_Solyc07g065000_22179
query:14314;rank:1	-0.979415	1	1	X.PGSVSPDCGSGASTNSRKGTGG.X	DECOY0_Solyc01g087800_3121
query:11517;rank:1	-0.979415	1	1	X.SAMLRHLRTTLADGSVKH.X	DECOY0_Solyc11g010370_30297
query:18786;rank:1	-0.979417	1	1	X.PPLITFSTALASPPVHSDQAKYALIF.X	DECOY0_Solyc11g012060_30463
query:20216;rank:1	-0.979493	1	1	X.DRIVPLASLAEVTVSPSRQHSSLLIKKR.X	DECOY0_Solyc03g111710_10753
query:5633;rank:1	-0.97951	1	1	X.GSLSSPSSGGSQC.X	DECOY0_Solyc06g051540_18057
query:5349;rank:1	-0.97951	1	1	X.SFSAEQSTYT.X	DECOY1_Solyc02g030210_5494
query:4109;rank:1	-0.979555	1	1	X.SFGTPLGVKLIT.X	DECOY0_Solyc12g011140_32761
query:18431;rank:1	-0.979592	1	1	X.LMLLTMNSLSSLPSTTTHSASSL.X	DECOY0_Solyc10g086420_29825
query:10467;rank:1	-0.979592	1	1	X.ISNSYLLKSLKERRSL.X	DECOY0_Solyc11g066480_31761
query:15491;rank:1	-0.979605	1	1	X.NSAIMVLSSDQMKINRIVVVPL.X	DECOY0_Solyc05g054310_16811
query:3800;rank:1	-0.979605	1	1	X.QPNSSSSFN.X	DECOY1_Solyc07g052300_21422
query:22197;rank:1	-0.979691	1	1	X.RALIISGKKVEPPKDSVIPVTIDDSAVFNSNNWAVL.X	DECOY0_Solyc09g064940_26349
query:21257;rank:1	-0.979691	1	1	X.AVCTEMETIAMFLAWDKMRVSSLPVKLVSD.X	DECOY0_Solyc07g055580_21739
query:6562;rank:1	-0.979691	1	1	X.LLPVALFKGTDILP.X	DECOY1_Solyc03g122280_11800
query:1034;rank:1	-0.979691	1	1	X.KIGNLDSK.X	DECOY0_Solyc10g044740_28183
query:17825;rank:1	-0.979693	1	1	X.AGFVKSVGQTKVPPLAIKLSTLKNCS.X	DECOY0_Solyc01g008170_1205
query:16723;rank:1	-0.979693	1	1	X.TNSRHSGNSGMDCLLSSSGSN.X	DECOY1_Solyc04g078690_14194
query:16317;rank:1	-0.979693	1	1	X.LSGGLLVEANLREIEPLFRALTE.X	DECOY1_Solyc12g006480_32394
query:15540;rank:1	-0.979693	1	1	X.YSSIFGELASSGSLEYSSGMPT.X	DECOY0_Solyc02g083940_7455
query:11356;rank:1	-0.979693	1	1	X.GSTVSMLEHTVLLKIYT.X	DECOY1_Solyc10g018410_27952
query:8282;rank:1	-0.979693	1	1	X.KVGMYLKDKMKVLK.X	DECOY0_Solyc05g050480_16431
query:7138;rank:1	-0.979693	1	1	X.YTRGLSPIVRSLIM.X	DECOY0_Solyc05g005910_14713
query:19935;rank:1	-0.979701	1	1	X.YTAGQTSPMRTMNMNSSVGGGNGGQAT.X	DECOY0_Solyc03g083340_10127
query:16401;rank:1	-0.979701	1	1	X.ESHVLCYGYMGVRLYQLEVIDA.X	DECOY1_Solyc01g008380_1226
query:11629;rank:1	-0.979701	1	1	X.QVLQVTSSKKEGMVSKQG.X	DECOY0_Solyc07g007180_20071
query:5445;rank:1	-0.979701	1	1	X.REKGGISKIYSVI.X	DECOY1_Solyc10g019270_28032
query:4729;rank:1	-0.97979	1	1	X.LLSFLMITLNVN.X	DECOY0_Solyc02g072440_6703
query:2273;rank:1	-0.97979	1	1	X.KGMLLLESIN.X	DECOY1_Solyc05g046290_16312
query:10655;rank:1	-0.979796	1	1	X.SLSVQRARGSAVLEPKNN.X	DECOY0_Solyc04g076510_13977
query:3098;rank:1	-0.979796	1	1	X.MLVRAKSSMI.X	DECOY1_Solyc02g079120_6974
query:1790;rank:1	-0.979796	1	1	X.KTQIPLVTY.X	DECOY0_Solyc01g086710_3015
query:13698;rank:1	-0.979831	1	1	X.YTSTIDPNLDPPLMRKILL.X	DECOY0_Solyc10g009480_27761
query:13595;rank:1	-0.979831	1	1	X.SSGSGSLLVGMSSDMLS.X	DECOY0_Solyc10g084250_29609
query:3787;rank:1	-0.979831	1	1	X.KNPPGLLPSHAR.X	DECOY0_Solyc01g079570_2801
query:21752;rank:1	-0.979889	1	1	X.AGSRFFLLGSFSFVVKTKTILLTIFLMQAKVR.X	DECOY0_Solyc03g063450_9753
query:9992;rank:1	-0.979889	1	1	X.LREIVGTDPLLNSKLN.X	DECOY1_Solyc01g067090_2556
query:7833;rank:1	-0.979889	1	1	X.MTLAVGMNVTIVIFM.X	DECOY1_Solyc06g063240_18522
query:2473;rank:1	-0.979889	1	1	X.KDPMIEPAMV.X	DECOY1_Solyc01g057630_2218
query:717;rank:1	-0.979889	1	1	X.TYLARLY.X	DECOY0_Solyc09g014900_25487
query:7321;rank:1	-0.979891	1	1	X.CTIHRTPTGTKFGG.X	DECOY1_Solyc01g109450_4880
query:6932;rank:1	-0.979891	1	1	X.VKVSMKGGGFIILEN.X	DECOY1_Solyc08g080460_24514
query:22545;rank:1	-0.97997	1	1	X.KAATVKTEKARELERFKGTKNRFFWTKLRKF.X	DECOY0_Solyc06g073300_19223
query:19832;rank:1	-0.97997	1	1	X.SGVDVGRYLPTVLEDTGAPQGAKYLKFGH.X	DECOY1_Solyc01g099980_4038
query:16587;rank:1	-0.97997	1	1	X.KVLLKKLADQALSKALMKAVLYN.X	DECOY0_Solyc05g055910_16971
query:13332;rank:1	-0.97997	1	1	X.SPLTPLDHLHKASSPAAAMG.X	DECOY0_Solyc02g069470_6407
query:3863;rank:1	-0.97997	1	1	X.PARRPYKSFGL.X	DECOY0_Solyc07g062300_21911
query:16363;rank:1	-0.97997	1	1	X.VALEYSLHSGSARIAVPLDCGKIF.X	DECOY1_Solyc03g120460_11618
query:4437;rank:1	-0.97997	1	1	X.THLPDSPLLEIN.X	DECOY0_Solyc06g065410_18639
query:5080;rank:1	-0.979987	1	1	X.KSGGSLLVETLVM.X	DECOY1_Solyc06g063360_18534
query:18708;rank:1	-0.979988	1	1	X.KSMEELISNCDTVSNNGSASEVN.X	DECOY1_Solyc08g068890_23872
query:18626;rank:1	-0.980087	1	1	X.INPPDVSASRGPPPSHLARSKMSMSFK.X	DECOY1_Solyc07g044780_21174
query:10663;rank:1	-0.980087	1	1	X.NSPNETSNFPYSQTT.X	DECOY0_Solyc02g031990_5567
query:16797;rank:1	-0.980108	1	1	X.GFCDKILLPGKYTAVLVGTAALPGN.X	DECOY0_Solyc09g009710_25171
query:14875;rank:1	-0.980108	1	1	X.SLNHHALKYSMLALQMKTAL.X	DECOY0_Solyc05g006270_14749
query:3803;rank:1	-0.980108	1	1	X.NESANTASSS.X	DECOY0_Solyc11g007850_30145
query:23643;rank:1	-0.980177	1	1	X.LSSGDTLGRKQLIQELLIFNGPSITLLELALVEHVRSLTL.X	DECOY0_Solyc09g072720_26527
query:18137;rank:1	-0.980186	1	1	X.RSNAFTSTTANFSLTPVSFPI.X	DECOY0_Solyc02g069690_6429
query:13923;rank:1	-0.980186	1	1	X.SVAAMYIGSASLLKSVMPKASC.X	DECOY0_Solyc01g105260_4463
query:11502;rank:1	-0.980186	1	1	X.PGIQKLLEQKQKAPIAFV.X	DECOY0_Solyc01g094510_3493
query:6920;rank:1	-0.980246	1	1	X.SPKAAKTGVIDAVNR.X	DECOY1_Solyc04g079310_14256
query:9272;rank:1	-0.980273	1	1	X.GVPVRRTVDGFKIVIAA.X	DECOY0_Solyc10g007600_27575
query:8416;rank:1	-0.980273	1	1	X.LYSVLDPFVALKRSL.X	DECOY0_Solyc01g088620_3203
query:2101;rank:1	-0.980273	1	1	X.LALRRATSLT.X	DECOY1_Solyc12g014180_32866
query:22581;rank:1	-0.980285	1	1	X.NGVVLRTKSSVRIIVDSVVFLIKSAYIYEPAVTSSC.X	DECOY0_Solyc04g056460_13475
query:14780;rank:1	-0.980285	1	1	X.KEEDVYLVSIILANNISNNE.X	DECOY0_Solyc08g082280_24695
query:1435;rank:1	-0.980285	1	1	X.KRKLGLADD.X	DECOY0_Solyc06g035450_17679
query:6387;rank:1	-0.980368	1	1	X.PASPDNAAGRDMTVF.X	DECOY0_Solyc03g118010_11375
query:1095;rank:1	-0.980368	1	1	X.SQKPKKMN.X	DECOY1_Solyc11g008470_30206
query:19696;rank:1	-0.980384	1	1	X.FSTIAYLSHMVVLWQLSGVPFFGASYPT.X	DECOY1_Solyc08g078440_24316
query:15828;rank:1	-0.980384	1	1	X.AVVFSRGLIEVVTSLVKMVGRTV.X	DECOY0_Solyc02g077830_6845
query:6676;rank:1	-0.980384	1	1	X.NSGTSRDTPSY.X	DECOY0_Solyc08g068570_23841
query:6464;rank:1	-0.980384	1	1	X.GDLFSIATTLMSR.X	DECOY1_Solyc12g049580_33854
query:10823;rank:1	-0.980384	1	1	X.MGDNISSVLILGALEYGVA.X	DECOY0_Solyc09g055910_25961
query:10534;rank:1	-0.980384	1	1	X.PLFRSSLMLGIGFAGRL.X	DECOY0_Solyc00g052430_485
query:9449;rank:1	-0.980384	1	1	X.KITSSSMSISYE.X	DECOY1_Solyc09g056360_26006
query:9357;rank:1	-0.980384	1	1	X.MKEQMKVSSVEGKKGG.X	DECOY1_Solyc02g065340_6094
query:9387;rank:1	-0.980463	1	1	X.GAISGARLSLRLSLLSN.X	DECOY1_Solyc07g008530_20206
query:7914;rank:1	-0.980463	1	1	X.FALTLVAGKRWTTTN.X	DECOY1_Solyc12g032950_33226
query:21727;rank:1	-0.980483	1	1	X.LMMHVAVNTVRVGFFIFIIYFSHGVVFSSIN.X	DECOY0_Solyc12g011460_32793
query:15939;rank:1	-0.980483	1	1	X.ISLYANERMRQTTLEKGRIGG.X	DECOY1_Solyc04g076620_13988
query:7532;rank:1	-0.980483	1	1	X.KATSYITSGSATF.X	DECOY0_Solyc11g050730_31391
query:23411;rank:1	-0.980522	1	1	X.AFYAMISIIIIIDARSGKMDFLFTSFVKAAIYVAECEKAN.X	DECOY1_Solyc02g078960_6958
query:22814;rank:1	-0.980522	1	1	X.CTSSQMLSLEPNEKADVEIDNDQKESELSVETS.X	DECOY1_Solyc08g069050_23886
query:18207;rank:1	-0.980522	1	1	X.ELLPEAKRQRKATSIAVLTELQLF.X	DECOY1_Solyc06g071780_19072
query:17947;rank:1	-0.980522	1	1	X.HSQKAITLYLDMQERLMRIASLM.X	DECOY1_Solyc08g081890_24656
query:13696;rank:1	-0.980522	1	1	X.GTDGSFSVRKGKTDLIKLTL.X	DECOY1_Solyc08g083290_24794
query:10166;rank:1	-0.980522	1	1	X.PLETGLQVVSLRAHEVQ.X	DECOY1_Solyc04g054480_13384
query:6048;rank:1	-0.980522	1	1	X.TVYGVLLFSAPSGE.X	DECOY1_Solyc01g111530_5088
query:3829;rank:1	-0.980522	1	1	X.ADSNNSGDLAVLN.X	DECOY0_Solyc01g102890_4227
query:19089;rank:1	-0.980558	1	1	X.DLIVLVLVLLLVGLVVVFLVVATMVVFV.X	DECOY0_Solyc12g063000_34089
query:19029;rank:1	-0.980558	1	1	X.ALTNSPYTNVNLHDAMIFGHVPKTDF.X	DECOY1_Solyc03g083550_10148
query:13165;rank:1	-0.980558	1	1	X.ATRAKRKLSHLTPPQFA.X	DECOY0_Solyc04g007640_12045
query:5574;rank:1	-0.980558	1	1	X.LIHGKNRILRVF.X	DECOY1_Solyc08g062310_23428
query:1064;rank:1	-0.980558	1	1	X.QGVAAGSAGLE.X	DECOY0_Solyc07g065520_22231
query:14677;rank:1	-0.980583	1	1	X.KGSIQRLEMLTLDGTRGSGTM.X	DECOY0_Solyc04g009270_12207
query:13509;rank:1	-0.980583	1	1	X.RVTMLLVLPLIEIDITILN.X	DECOY1_Solyc12g036120_33332
query:10636;rank:1	-0.980583	1	1	X.QQSSKTRTSETSIA.X	DECOY0_Solyc09g009610_25161
query:3747;rank:1	-0.980583	1	1	X.FITEPTATDM.X	DECOY1_Solyc04g025160_12788
query:21826;rank:1	-0.980654	1	1	X.AVLFLLVILTANNACHFRLLKKEFRTMLFY.X	DECOY1_Solyc05g053110_16692
query:9259;rank:1	-0.980654	1	1	X.HLDMTGISQGSILDIT.X	DECOY0_Solyc06g063210_18519
query:20779;rank:1	-0.98066	1	1	X.PTQIPVTQEYLTLLQFTIAIGSPRILQLEK.X	DECOY1_Solyc09g061760_26234
query:18861;rank:1	-0.98066	1	1	X.AHINTTILTDLENIFPLFSIKKRL.X	DECOY1_Solyc09g091670_27126
query:16391;rank:1	-0.98066	1	1	X.IVKLTYGKGDNFIIQLLIDPTN.X	DECOY1_Solyc09g005660_24872
query:10252;rank:1	-0.98066	1	1	X.MIGSRDLKFDASRRPG.X	DECOY1_Solyc02g083650_7426
query:3697;rank:1	-0.98066	1	1	X.KRLLRDGDMY.X	DECOY0_Solyc09g065510_26405
query:11314;rank:1	-0.980682	1	1	X.ALRQLDTVRIIIPKHPN.X	DECOY1_Solyc01g016600_1734
query:3818;rank:1	-0.980682	1	1	X.LKGRGKKMKGAN.X	DECOY1_Solyc12g007180_32464
query:3215;rank:1	-0.980682	1	1	X.YTDSTNSGGT.X	DECOY0_Solyc08g079030_24375
query:17797;rank:1	-0.980749	1	1	X.KKSLPFKLQQMHSMEFNGKMAVV.X	DECOY1_Solyc01g094480_3490
query:21594;rank:1	-0.980781	1	1	X.PWLDGKVTKNSDMVIWGWEHDVHDKKTDVF.X	DECOY1_Solyc02g070620_6522
query:6917;rank:1	-0.980781	1	1	X.FAIKTGEKKRSDF.X	DECOY0_Solyc05g053600_16741
query:5454;rank:1	-0.980781	1	1	X.IVPHSEGMTALSI.X	DECOY1_Solyc11g062310_31546
query:4382;rank:1	-0.980798	1	1	X.TNMMGGSHNIS.X	DECOY0_Solyc07g007040_20057
[truncated: 6,418 more rows]
